# Supplementary material for: The genome and transcriptome of Phalaenopsis yield insights into floral organ development and flowering regulation
Source: PeerJ. 2016 May 12;4:e2017. doi: 10.7717/peerj.2017 (PMC4868593; doi:10.7717/peerj.2017)
Supplement: Supplemental Information 1 [file peerj-04-2017-s001.xlsx]

## Sheet: Dataset S1
Dataset S1: FPKM table of unigenes against RNA-seq data of Phalaenopsis tissues.
		Floral organ						PLB		shoot tip					Leaf		Vegetative tissue			Reproductive tissue	Germinating seed
ID	BLAST_annotation	KHM190_NL value	KHM190_NP value	KHM190_NS value	KHM190_PL value	KHM190_PP value	KHM190_PS value	B190-0 value	B190N-2w value	BH value	BL1 value	BL2 value	BL3 value	BL4 value	BN value	BW value	SRR139062 value	SRR139063 value	SRR139064 value	SRR139065 value	SRR139066 value	SRR139067 value
XLOC_024307	basic leucine zipper (bZIP) transcription factor family protein [Musa acuminata]	11.614	10.3755	8.91115	14.1158	9.95378	9.86086	7.73071	3.68689	1.63211	0.35736	0.264903	0.259362	0.235334	0.0705512	0.0918055	0	0	0	1.93346	0.62488	0.232578
XLOC_063214	PREDICTED: sorting and assembly machinery component 50 homolog [Cucumis sativus] >gi|449490420|ref|XP_004158600.1| PREDICTED: sorting and assembly machinery component 50 homolog [Cucumis sativus]	20.0171	15.9442	13.851	4.60433	19.4562	13.3132	1.40005	2.80248	6.40186	13.4362	12.0585	9.08319	7.45549	8.40901	4.31863	0	0	0	6.90144	4.91306	1.62639
XLOC_090178	Uncharacterized protein TCM_033752 [Theobroma cacao]	0.335986	0.440297	0.111346	0.207722	0.371214	0.376695	0.444851	0.980658	0	0.0290142	0.147492	0.112799	0.0517083	1.03166	1.36108	0.372081	0	0.575233	0.409769	0.586027	0.583671
XLOC_060574	hypothetical protein OsI_04891 [Oryza sativa Indica Group]	520.397	0	0	0	0	0	0	553.036	0	0	0	0	0	0	0	0	0	0	546.293	200.334	360.943
XLOC_012196	hypothetical protein [Citrus unshiu]	18.3253	10.0513	12.2909	20.474	12.6046	13.4652	8.26365	5.41908	21.7208	22.9858	18.6412	13.7401	20.4343	4.68264	3.85017	0	0	1.64938	3.74522	10.0318	7.35439
XLOC_040362	PREDICTED: ABC transporter G family member 16-like [Brachypodium distachyon]	0.0151821	0	0	0	0	0	5.52331	3.19873	0	0.0950629	0.24885	0.0448396	0.151604	0.122764	0	1.96623	2.76473	2.08694	0.261272	2.90928	3.30329
XLOC_048769	hypothetical protein ZEAMMB73_720282 [Zea mays]	0	0	0	0	0	0	3.70301	3.26039	0	0.43249	0	0	1.16283	0	0	0	0	0	0	0.298315	0.251433
XLOC_032623	thioredoxin Y1 [Arabidopsis thaliana] >gi|75324340|sp|Q6NPF9.1|TRXY1_ARATH RecName: Full=Thioredoxin Y1, chloroplastic; Short=AtTrxy1; Flags: Precursor >gi|38454080|gb|AAR20734.1| At1g76760 [Arabidopsis thaliana] >gi|38604000|gb|AAR24743.1| At1g76760 [Arabidopsis thaliana] >gi|110743067|dbj|BAE99426...	411.848	1007.43	878.968	1032.65	1074.97	873.236	1718.92	81.5857	19.7865	22.2652	27.1315	25.7631	27.4568	230.909	645.772	76.2166	88.8231	48.505	138.949	33.3928	43.3493
XLOC_020953	hypothetical protein OsJ_00835 [Oryza sativa Japonica Group]	0.421527	0.421907	0.800235	0.294033	0.234202	0.195874	11.5615	7.34958	1.16527	4.67131	4.83916	4.62456	5.42638	8.08839	20.9853	4.42114	7.01861	1.29195	6.41371	11.4643	18.889
XLOC_077021	hypothetical protein OsJ_36171 [Oryza sativa Japonica Group]	145.349	138.194	116.48	205.006	139.426	125.861	112.997	54.1298	222.285	165.144	175.385	179.133	206.102	123.819	75.8477	0	3.03721	2.07988	30.5286	45.3491	40.8113
XLOC_052102	Xeroderma pigmentosum complementation group B 1 isoform 1 [Theobroma cacao]	27.8579	26.2911	28.9122	26.7812	21.7811	28.045	9.91012	8.39475	19.6654	38.832	38.0621	40.4597	33.6565	32.2912	26.844	0.643162	1.90789	0.489599	15.9927	16.7172	27.1228
XLOC_066895	PREDICTED: SEC12-like protein 2-like [Vitis vinifera]	20.5344	19.1563	24.694	20.8856	18.4994	20.9842	13.5164	23.3789	23.9072	41.7552	38.476	42.278	44.765	36.6358	35.2469	21.9865	19.806	17.347	22.165	23.8956	31.6339
XLOC_022072	hypothetical protein CARUB_v10001258mg [Capsella rubella]	2.08877	2.06772	1.52464	3.05715	2.851	2.50827	1.12335	1.68031	0.802036	0.721565	0.889754	0.239896	0.346288	0.303067	0.367354	9.02734	12.702	15.3757	1.38062	2.90501	1.59706
XLOC_085271	Cucumisin precursor, putative [Ricinus communis] >gi|223549568|gb|EEF51056.1| Cucumisin precursor, putative [Ricinus communis]	9.60032	12.9697	7.58808	7.62358	8.30268	14.0562	4.79337	0.398632	0.0925693	0.538123	0.429462	0.343073	0.678885	0.331384	0.363815	1.50414	1.12903	1.05803	3.44927	0.63641	0.622696
XLOC_033472	unnamed protein product [Vitis vinifera]	3.25379	3.51518	3.13724	2.72906	2.41738	2.88233	2.6383	0.698822	6.01733	3.42406	2.21852	2.31558	2.1974	1.13823	1.23427	0.267546	1.04238	1.28408	7.51659	3.42826	1.80392
XLOC_033308	trehalose-6-phosphate synthase [Camellia sinensis]	0.837536	0.393411	2.07408	0.408297	0.397921	0.732585	3.86473	1.29365	0	0.00135701	0	0.024308	0.300602	2.0188	0	3.9264	0.0212698	0.92131	764.126	0	0
XLOC_037269	CSLA9-like protein [Eucalyptus cladocalyx]	1.71155	1.40313	4.9585	1.55193	1.40673	4.13467	0	0.748372	0.0934104	0.282515	0.293151	0.379811	0.252387	0.841745	0.347409	0	0	0	0.0863535	0	0
XLOC_031447	Ribosomal protein S5/Elongation factor G/III/V family protein [Theobroma cacao]	17.6681	15.8484	8.97757	23.5002	15.3649	14.4929	31.5976	16.9548	15.6586	52.4719	55.4426	52.759	45.4046	41.8452	25.6258	30.1253	0.022212	218.88	63.247	63.8891	82.4719
XLOC_046287	Calcium-binding EF hand family protein [Theobroma cacao]	15.5601	16.5886	16.0055	16.2726	18.4274	18.4526	19.3484	40.4038	19.9569	15.722	15.9441	15.2158	14.9565	12.2378	22.0757	13.7315	21.2931	14.4826	6.79419	21.2869	17.6833
XLOC_030950	RecName: Full=Mannosylglycoprotein endo-beta-mannosidase; Short=Endo-beta-mannosidase; Contains: RecName: Full=Mannosylglycoprotein endo-beta-mannosidase 31 kDa subunit; Contains: RecName: Full=Mannosylglycoprotein endo-beta-mannosidase 28 kDa subunit; Contains: RecName: Full=Mannosylglycoprotein en...	4.09279	3.35597	3.45808	4.0874	3.2783	4.37101	2.51809	3.02045	1.05399	1.45351	1.88927	2.4426	1.96077	0.390425	0.677492	1.27346	0.716672	1.76468	2.39035	1.35086	0.865028
XLOC_045335	PREDICTED: serine/threonine-protein kinase HT1-like isoform X1 [Cicer arietinum] >gi|502159048|ref|XP_004511376.1| PREDICTED: serine/threonine-protein kinase HT1-like isoform X2 [Cicer arietinum]	0	0	1.04031	0.22201	0.477987	0.201313	9.54215	6.72551	0	0	0	0	0	0	0	0	0	0	0.170639	0	0
XLOC_038259	PREDICTED: aspartic proteinase nepenthesin-1-like [Cicer arietinum]	0.225736	2.14637	0.47904	0.0671554	0.0784041	1.21062	0	0	6.68896	19.6428	19.0162	23.7065	26.228	6.98852	1.63176	72.5463	89.3783	108.704	5.79732	0	0.247827
XLOC_085032	exocyst componenet sec8, putative [Ricinus communis] >gi|223544490|gb|EEF46009.1| exocyst componenet sec8, putative [Ricinus communis]	32.6534	46.7284	49.4731	60.7916	36.684	40.8824	56.0684	41.2337	0	1.27009	7.88579	5.51296	5.37967	0	0	0	0	0	0	0	0.241041
XLOC_043751	PREDICTED: APO protein 4, mitochondrial-like [Solanum lycopersicum]	10.4463	7.0699	6.47145	11.497	8.91567	10.2018	13.1678	5.83815	0.85239	5.35055	7.17394	9.23478	6.26907	3.02616	5.04065	0	0	0	6.03545	1.29504	4.06605
XLOC_059572	PREDICTED: meiotic recombination protein SPO11-1-like [Fragaria vesca subsp. vesca]	2.05058	1.17128	3.4713	5.062	2.86874	6.10189	1.78226	4.23126	0.305575	7.0464	7.79587	6.3315	3.33908	2.27513	0	0	3.32405	0	1.9709	2.32683	1.84315
XLOC_055229	hypothetical protein PRUPE_ppa006704mg [Prunus persica]	11.5359	6.63127	6.80394	12.8541	8.77668	11.6476	2.38248	2.51883	0.858162	3.23593	3.05393	3.41429	3.02218	4.35731	3.55112	3.30998	0	0	26.6823	11.1505	11.427
XLOC_044943	TCP transcription factor [Lilium longiflorum]	0	0	0.0283076	0.0600949	0	0	0.240651	0	0.586376	0.299697	0.248015	0.771485	0.994314	0	0	0.517911	0	0	0.232457	0	0.0389235
XLOC_040824	PREDICTED: uncharacterized protein LOC101777770 [Setaria italica]	1.23945	0.894579	0.532222	0.83222	0.589638	0.591037	25.1721	9.90412	4.16768	7.28665	6.39043	5.47085	8.07847	6.71967	3.06697	10.8653	12.8687	18.0079	2.05177	8.57631	9.06573
XLOC_008346	PREDICTED: uncharacterized protein LOC101498018 [Cicer arietinum]	0.0436706	0.252383	0.710075	0.142568	0.126447	0.0487622	2.48066	0.67921	2.08317	0.162891	0.235038	0.114851	0	2.35091	4.24486	6.76948	4.01636	4.88193	1.73563	8.50485	5.91959
XLOC_050966	predicted protein [Populus trichocarpa] >gi|222870608|gb|EEF07739.1| predicted protein [Populus trichocarpa]	16.0855	27.7029	21.7596	13.5344	26.9491	27.8782	64.0863	56.2443	23.2288	23.5751	32.6924	35.0643	40.178	64.6143	50.5749	115.508	158.848	122.496	24.311	11.0827	10.9895
XLOC_014385	U-box domain-containing protein 62 [Arabidopsis thaliana] >gi|75120710|sp|Q6DBN5.1|PUB62_ARATH RecName: Full=U-box domain-containing protein 62; AltName: Full=Plant U-box protein 62 >gi|50198810|gb|AAT70438.1| At5g05230 [Arabidopsis thaliana] >gi|53828605|gb|AAU94412.1| At5g05230 [Arabidopsis thalia...	13.3067	16.027	22.7983	17.5842	22.6031	20.5116	12.0401	15.3654	0	0	0	0	0.450613	0	0	6.70012	0	0	0	0	0
XLOC_055915	PREDICTED: uncharacterized protein LOC100258456 [Vitis vinifera]	4.82008	5.21288	3.48978	6.24244	4.807	4.65078	0.60337	0.605203	1.24555	2.34782	3.05277	2.20384	3.34568	0.846056	0.508042	0	0.264423	0	0.188719	0.35587	0.278003
XLOC_068326	PREDICTED: uncharacterized protein LOC100246370 [Vitis vinifera] >gi|296087274|emb|CBI33648.3| unnamed protein product [Vitis vinifera]	0	0	0	0	0	0	0.548385	0	14.837	0	0.320255	0.334289	0	0.918261	0	0.000252822	0.815738	4.51562	54.6699	0.935849	1.74091
XLOC_083635	uncharacterized protein LOC100805289 [Glycine max] >gi|255638981|gb|ACU19791.1| unknown [Glycine max]	5.51342	3.88575	2.31713	4.94769	3.90063	2.06306	0.835995	0.882145	0	0	0.195778	0	0	0.673461	0	0	0	0	0.215216	0.290093	0.398674
XLOC_041303	Histone H4 [Aegilops tauschii]	89.0336	110.823	62.7313	54.1716	103.921	91.7772	57.0715	94.5488	38.9842	93.3685	71.5751	66.0334	63.4808	50.5622	53.8778	81.7087	28.6142	53.8775	23.7937	28.5306	14.3375
XLOC_000970	PREDICTED: kinesin-like protein KIN12A-like, partial [Cucumis sativus]	1.70352	1.20926	1.31673	1.66132	1.15779	0.994096	0	0	0.573905	0.95538	1.13277	0.557616	0.140291	0.322812	0.193031	0.37236	0	0	0.149786	0.323974	0.459013
XLOC_031988	hypothetical protein OsI_30639 [Oryza sativa Indica Group]	0	0	0	0	0.50851	1.21309	0	3.03461	0	0	0	0	0	11.3098	13.4144	0	0	0	18.4978	0	0
XLOC_028936	glutaredoxin [Populus trichocarpa] >gi|222854528|gb|EEE92075.1| glutaredoxin [Populus trichocarpa]	1.84472	2.52968	11.5207	0.890353	2.76642	6.49359	66.8361	2.1253	0	1.5114	1.50101	0.70528	0.912596	9.58191	26.639	9.14367	4.64298	1.98453	7.42529	8.96427	8.65344
XLOC_023380	hypothetical protein VITISV_041985 [Vitis vinifera]	11.5457	9.88304	9.07215	14.3835	10.878	7.6601	13.7229	7.33896	1.89189	3.51238	3.75877	4.24968	4.7326	4.25922	7.39961	16.2844	5.98705	11.1098	8.05967	5.38834	7.767
XLOC_046814	PREDICTED: 60S ribosomal protein L13-2-like isoform 1 [Brachypodium distachyon] >gi|357144874|ref|XP_003573443.1| PREDICTED: 60S ribosomal protein L13-2-like isoform 2 [Brachypodium distachyon]	13.5859	11.1192	9.22308	14.2331	13.3245	10.3308	17.5107	20.2073	15.9613	17.8327	17.2536	13.7745	11.8531	14.3334	16.8887	44.1805	42.7745	64.6582	11.6711	28.8672	47.9765
XLOC_072104	PREDICTED: putative methylsterol monooxygenase DDB_G0269788-like [Brachypodium distachyon]	0	1.41232	0.818084	1.26767	0	1.01792	0	0	0	0.0107921	0	0	0	0	0	0	1.38946	0	0	16.7497	12.7091
XLOC_012220	PREDICTED: ATP-dependent RNA helicase DHX8-like [Setaria italica]	28.4438	31.4518	30.401	34.765	31.8466	29.5315	40.1468	41.196	50.1453	55.4232	56.6931	47.8756	56.6295	46.5259	64.3374	22.1667	22.7354	22.7949	23.8333	33.2429	39.5394
XLOC_038275	PREDICTED: uncharacterized protein C9orf114 homolog isoform X1 [Setaria italica] >gi|514728616|ref|XP_004956504.1| PREDICTED: uncharacterized protein C9orf114 homolog isoform X2 [Setaria italica]	20.4535	22.1295	18.9176	23.3254	25.1626	19.9618	14.6964	11.9943	30.6389	25	24.3269	26.8586	28.7393	17.8604	18.5231	14.3812	18.8279	18.8751	14.8971	12.3727	15.0284
XLOC_075015	glucose inhibited division protein A, putative [Ricinus communis] >gi|223544550|gb|EEF46067.1| glucose inhibited division protein A, putative [Ricinus communis]	0	0	0	0	0	0	0.983251	1.16482	0	0	0	0	0	0	0	0	0	0	0	0	0
XLOC_053142	PREDICTED: tyramine N-feruloyltransferase 4/11-like [Brachypodium distachyon]	1.55888	1.46643	3.08236	0.505072	1.01199	0	0	1.35562	0	1.17641	1.43331	1.17826	1.24863	0.325142	6.25447	16.3634	21.7173	9.13995	4.61211	18.5619	13.1232
XLOC_053533	hypothetical protein SELMODRAFT_172660 [Selaginella moellendorffii] >gi|300159698|gb|EFJ26317.1| hypothetical protein SELMODRAFT_172660 [Selaginella moellendorffii]	1.78e-05	0.174635	0.101122	0.12604	3.46e-06	0.0417008	0.0565811	0	2.74149	1.07532	1.00172	1.32579	3.10807	0.148073	0.0545464	0.232452	0	0	0.997218	0.636875	0.465515
XLOC_064373	PREDICTED: ferredoxin--nitrite reductase, chloroplastic-like [Setaria italica]	0.416395	0.507501	0.566501	0.763022	0.531494	2.35235	28.8411	427.522	3.35566	3.82037	1.86304	2.57789	2.69609	3.55766	4.4155	35.2488	24.4918	4.97618	1.06153	401.243	465.361
XLOC_062729	PREDICTED: GATA transcription factor 26-like [Cucumis sativus] >gi|449517838|ref|XP_004165951.1| PREDICTED: GATA transcription factor 26-like [Cucumis sativus]	0.506402	0.801491	0.841764	0.396333	0	0.68648	6.70529	3.42149	2.14319	0.676865	0.505369	0	1.6932	0.854703	3.17536	0.30078	0	3.024	19.1682	3.49031	3.96743
XLOC_054533	protein tyrosine phosphatase 1 [Phalaenopsis amabilis]	2.51105	3.2876	2.38951	3.84702	1.92464	2.50811	1.84153	2.09849	2.51218	4.67453	4.47589	3.52533	3.36473	3.9152	3.58249	2.93348	3.66685	2.81763	3.32483	4.17104	5.51946
XLOC_044613	hypothetical protein M569_01376, partial [Genlisea aurea]	6.58426	4.7355	5.86782	2.9045	3.57715	3.81	3.68791	2.07457	2.58131	5.44411	3.73186	5.37242	3.9915	1.68895	1.68297	0	0.49761	0	1.30534	0.536949	0.635407
XLOC_089662	Transducin/WD40 repeat-like superfamily protein, putative [Theobroma cacao]	0.624265	0.913372	1.76478	1.36261	1.51173	1.06051	6.02494	7.52331	0	0	0	0	0	1.37142	0.913554	0	0	0	3.75145	0.694423	0.230569
XLOC_087881	RecName: Full=Calcium and calcium/calmodulin-dependent serine/threonine-protein kinase; Short=LlCCaMK >gi|860676|gb|AAC49008.1| calcium/calmodulin-dependent protein kinase [Lilium longiflorum] >gi|1097385|prf||2113422A Ca/calmodulin-dependent protein kinase	3.1908	2.93525	2.35815	3.82406	4.38123	2.72621	13.7018	9.40629	0.679069	4.72239	6.21114	3.25889	5.88908	4.80109	8.88389	14.1729	9.51271	8.71835	9.95304	7.85935	12.3543
XLOC_087853	hypothetical protein OsJ_14636 [Oryza sativa Japonica Group]	5.36763	3.8951	4.28209	7.30894	6.50096	2.42664	38.2345	20.9076	0.324717	1.35585	2.56601	1.95599	3.40997	4.49043	0.179626	0	1.30407	0	2.28994	3.34558	3.40754
XLOC_079590	Mannosyl-oligosaccharide 1 2-alpha-mannosidase [Medicago truncatula] >gi|355511099|gb|AES92241.1| Mannosyl-oligosaccharide 1 2-alpha-mannosidase [Medicago truncatula]	3.43374	2.13802	9.60252	6.41941	3.20562	7.90746	1.17252	7.99598	12.4706	18.3396	18.08	15.2984	2.7247	15.9875	14.3852	4.4032	16.1451	7.8003	10.3154	7.96245	11.02
XLOC_065471	PREDICTED: pentatricopeptide repeat-containing protein At5g66520-like [Vitis vinifera]	3.34718	1.81142	1.08789	3.20074	1.50919	1.46222	0	0.704694	0.77701	1.0825	0.660711	0.46664	0.724237	0.597241	0.371076	0	0	0	1.92583	0.690848	0.541483
XLOC_064097	PREDICTED: uncharacterized protein LOC100248663 [Vitis vinifera]	6.35333	6.1218	3.2034	5.78469	10.5555	6.45814	2.72138	1.06086	0	0	0	0	0	0	0	0	0	0	0	0	0
XLOC_045590	hypothetical protein PRUPE_ppa004627mg [Prunus persica]	3.26312	4.00864	6.04664	5.14212	3.3353	4.36105	7.04721	7.43979	4.19954	9.79267	9.85274	14.3499	24.8153	6.51007	4.55432	1.12137	1.09639	2.89155	5.09914	6.32061	9.26803
XLOC_076846	zinc finger family protein [Arabidopsis lyrata subsp. lyrata] >gi|297337074|gb|EFH67491.1| zinc finger family protein [Arabidopsis lyrata subsp. lyrata]	0	0	0	0	0	0	0.516779	0.25168	0	0	0	0	0	0	0	0	0	0	0	0	0
XLOC_004398	T3P18.3 [Arabidopsis thaliana]	0.162012	0.411534	0.117536	0.294486	0	0.215834	0.27197	0.223876	0	0.0619475	0	0	0	0.0879702	0	0	0	0.580549	0.643641	0.132265	0.368638
XLOC_071582	PREDICTED: uncharacterized protein LOC100775500 [Glycine max]	129.37	92.4957	83.5844	116.604	78.1032	58.5904	172.988	122.126	58.6153	96.3947	125.087	107.133	90.0367	146.704	124.938	329.034	160.538	71.6264	202.427	312.278	187.466
XLOC_064203	Copper transporter 5 [Theobroma cacao]	0.513018	0.679497	2.77588	0.498736	0.526566	0	43.7248	27.44	0	0.894969	2.36526	2.03562	2.75764	1.2658	0.966417	0	2.05754	4.47883	3.13172	0.428681	0
XLOC_031974	hypothetical protein VITISV_029037 [Vitis vinifera]	0.607787	0.580402	0.703832	0.627128	0.547871	0.475985	0.825881	0.301131	0	0.501349	0.736741	0.557032	0.620452	0.33388	0.4915	0.418278	0.407069	0	0.392833	0.487413	0.759034
XLOC_063987	PREDICTED: sufE-like protein, chloroplastic-like isoform 1 [Brachypodium distachyon] >gi|357136705|ref|XP_003569944.1| PREDICTED: sufE-like protein, chloroplastic-like isoform 2 [Brachypodium distachyon]	1.1089	1.72124	1.93797	0.599801	1.71953	0.886333	16.4027	19.858	0	4.81805	4.88356	4.91788	9.97314	14.9701	36.6079	0	0	32.2821	1.50305	1.64471	1.86874
XLOC_041840	hypothetical protein VITISV_043833 [Vitis vinifera]	8.92277	6.67645	6.45418	7.80062	5.08017	6.71353	18.8743	7.44208	0.175943	0.680878	0.104813	0.204029	0.372078	0.139161	0	0	0	0	0	0.217044	0
XLOC_078372	RING/U-box domain-containing protein, putative isoform 1 [Theobroma cacao] >gi|508726708|gb|EOY18605.1| RING/U-box domain-containing protein, putative isoform 1 [Theobroma cacao] >gi|508726709|gb|EOY18606.1| RING/U-box domain-containing protein, putative isoform 1 [Theobroma cacao] >gi|508726710|gb|...	2.48344	3.15292	1.8464	2.81713	2.35932	4.19584	7.32658	3.19082	15.168	2.45992	4.03536	2.43906	6.31328	13.5919	21.616	5.24934	8.93436	1.35194	5.40454	1.62634	1.40556
XLOC_069656	PREDICTED: uncharacterized protein LOC100262721 [Vitis vinifera]	1.2438	0.957118	2.18087	1.0324	1.85624	2.43632	0.43197	0.566141	3.53106	1.99231	2.0675	1.91474	1.95634	1.13445	0.689417	1.10771	0	0	2.17349	0	0.0877602
XLOC_070875	PREDICTED: uncharacterized protein LOC100253823 [Vitis vinifera]	4.43241	4.01369	3.58061	6.1084	3.74349	4.69024	1.89785	3.18355	12.8356	22.9914	12.0053	21.652	34.5901	4.15749	2.75407	9.00533	5.8547	9.09	4.83063	5.46487	7.42347
XLOC_091717	unnamed protein product [Vitis vinifera]	72.8346	64.176	72.4274	76.9294	65.8091	51.0772	88.2704	62.2007	83.7565	166.391	156.045	102.186	130.087	16.6689	20.5803	72.8066	88.7586	64.7703	33.3897	122.187	206.601
XLOC_079272	hypothetical protein PRUPE_ppa023369mg [Prunus persica]	2.83506	2.43838	2.02342	2.86568	1.8038	2.47363	0.621435	1.60797	2.47452	1.67454	1.22346	1.01505	0.524172	2.89534	3.4216	0.454617	0.685352	0.177951	1.16917	4.09897	5.12777
XLOC_031855	PREDICTED: equilibrative nucleoside transporter 4 [Vitis vinifera] >gi|296081263|emb|CBI18007.3| unnamed protein product [Vitis vinifera]	2.97545	4.03188	4.12783	2.46677	2.45375	3.94415	0.517648	0.390945	0.833847	1.09739	0.747364	0.492916	1.00239	2.66678	1.46292	0	0	0	0.757426	0.218711	3.03069
XLOC_059449	PREDICTED: DUF246 domain-containing protein At1g04910-like [Glycine max]	7.86911	7.90803	7.82053	6.51334	9.13574	8.69808	4.37303	7.24078	1.80877	2.73921	2.90496	1.73893	1.74237	1.10379	3.56995	0	0	0	0.473131	0	0.357054
XLOC_014056	H0622F05.2 [Oryza sativa Indica Group] >gi|116309400|emb|CAH66477.1| OSIGBa0137L20.6 [Oryza sativa Indica Group] >gi|125548232|gb|EAY94054.1| hypothetical protein OsI_15831 [Oryza sativa Indica Group]	0.479664	0.0836483	0.253053	0.252801	0.314104	0.308342	2.71978	1.53995	0	0	0.078426	0.0230063	0.0966659	0	0.0738207	0	0	0	2.33058	1.28437	1.01377
XLOC_008553	unnamed protein product [Vitis vinifera]	89.8097	86.5136	66.3117	88.8734	101.717	69.4367	29.3975	24.5865	15.3346	32.9742	40.7561	25.8424	26.2652	16.1901	20.2604	60.2323	30.3663	25.9444	25.9027	15.0468	66.4711
XLOC_055576	Neutral/alkaline non-lysosomal ceramidase isoform 1 [Theobroma cacao]	23.758	22.9985	30.4585	28.9526	22.8361	21.202	32.5692	21.9737	54.8431	74.4949	62.1249	82.0575	77.1058	76.34	47.3978	56.2784	55.5255	53.4847	86.8558	55.1339	62.6975
XLOC_085202	Os01g0265700 [Oryza sativa Japonica Group] >gi|56783773|dbj|BAD81185.1| unknown protein [Oryza sativa Japonica Group] >gi|113532202|dbj|BAF04585.1| Os01g0265700 [Oryza sativa Japonica Group] >gi|125525302|gb|EAY73416.1| hypothetical protein OsI_01298 [Oryza sativa Indica Group] >gi|215766960|dbj|BAG...	6.49919	11.3916	6.03168	7.02641	8.5636	7.75539	6.95786	11.678	3.44158	18.4291	13.049	22.7478	9.82489	16.6142	8.30038	48.3319	49.3463	98.6963	6.09177	11.4815	3.82845
XLOC_082328	Cysteine synthase [Aegilops tauschii]	37.4259	39.9351	42.7018	36.1044	35.0674	40.2904	59.1986	85.8501	11.3553	13.4099	11.324	12.0302	9.00799	10.6821	12.7305	12.4202	17.9483	10.6264	9.11591	3.59628	4.9644
XLOC_043237	hypothetical protein PRUPE_ppa001220mg [Prunus persica]	0.816634	0.570679	1.04248	0.606499	1.05339	0.290589	2.02061	1.23084	0	0	0	0	0.040827	0	0	0	0	0	0	0	0
XLOC_040025	histone H2B [Malus domestica]	0.746502	1.87645	0.677062	0.635731	0.64121	0.90735	4.08992	13.9609	11.5089	4.98994	13.6125	8.99159	11.2381	2.21952	0	20.34	6.46462	14.5314	21.9455	0.859824	0.240115
XLOC_061124	60S ribosomal protein L24 [Zea mays]	0.153375	0.202168	0.239136	0.146257	0.339993	0.0717069	24.6626	17.8202	29.1862	31.2288	37.2	32.0517	34.7711	31.3753	25.7816	164.204	113.17	197.958	158.148	32.4911	48.5629
XLOC_026034	PREDICTED: probable polygalacturonase At1g80170-like [Vitis vinifera]	3.49018	3.92071	0.942987	5.71799	3.18248	2.72101	0	0	0.383083	6.60098	8.56936	16.9052	27.6038	0	0	0	0	0	0	0	0
XLOC_073348	predicted protein [Populus trichocarpa] >gi|222861170|gb|EEE98712.1| predicted protein [Populus trichocarpa]	23.0207	21.3067	20.1208	25.041	25.7923	24.4504	8.48617	10.2327	6.48907	7.0798	1.26776	1.03977	3.27458	0.519907	0.0951949	0.439107	3.70688	3.47511	11.5112	4.80462	7.56754
XLOC_065982	unknown [Glycine max]	109.95	112.777	71.085	75.046	109.298	104.224	45.1159	69.86	7.80814	13.9236	14.9878	17.5605	13.05	26.6553	53.4682	52.607	51.9803	47.6629	80.9456	24.3234	52.3026
XLOC_025809	PREDICTED: SNARE-interacting protein KEULE-like [Solanum lycopersicum]	12.6765	8.88642	9.84201	14.3856	13.8637	13.3571	11.7285	14.6521	14.2805	30.4774	27.7002	33.4589	32.5564	20.6365	15.3748	3.25209	6.44844	6.86875	8.84151	28.6843	34.2894
XLOC_038570	PREDICTED: uncharacterized protein LOC101304264 [Fragaria vesca subsp. vesca]	0	0	0	0	0	0	0.852758	0.288474	0	0.386717	1.20385	0.257775	2.52795	0.729907	0.219155	0	0	0	1.43257	0	0.113281
XLOC_011016	PREDICTED: uncharacterized protein LOC100268113 [Vitis vinifera]	0.303426	0	0.287708	0.504401	0.789822	0.596581	0	0	0	1.73488	1.31711	2.06615	1.74353	3.38819	1.27054	0	2.1335	0	2.19787	5.18639	3.05395
XLOC_030379	PREDICTED: uncharacterized protein LOC100248973 [Vitis vinifera]	9.67272	9.533	9.34409	10.021	11.2077	9.579	11.6969	9.91989	4.89513	6.15579	7.4597	7.47968	8.52933	6.91708	12.5923	1.54044	0.768793	2.28703	4.51873	7.19718	9.3867
XLOC_021564	hypothetical protein PRUPE_ppa006632mg [Prunus persica]	5.57623	7.5165	7.42629	8.01014	7.01554	7.67073	8.87013	2.52028	4.857	4.88122	3.80618	4.3049	3.39327	7.86633	8.1009	0	0.427501	0	1.33077	3.91465	5.78593
XLOC_053225	hypothetical protein ZEAMMB73_479610 [Zea mays]	60.0254	65.8232	56.2596	48.4403	69.9241	64.7185	54.7747	37.9368	14.7143	34.501	40.6662	45.6815	35.1985	29.069	63.4321	50.5491	53.8274	65.1604	14.1299	25.4075	47.8381
XLOC_052511	PREDICTED: uncharacterized protein LOC100254466 [Vitis vinifera]	5.63943	5.57303	8.17226	7.14027	6.1375	5.72117	8.41858	5.49323	11.8684	15.1674	13.2776	13.9078	15.4495	6.96817	5.3347	1.55045	2.46829	2.10941	2.77848	4.64407	5.60295
XLOC_006792	Os02g0516400 [Oryza sativa Japonica Group] >gi|255670940|dbj|BAF08871.2| Os02g0516400 [Oryza sativa Japonica Group]	1.8734	1.11513	0.963392	1.87074	1.30965	0.77269	0.461715	0.389286	0.272482	1.18277	0.759506	0.50115	0.449299	0	0	0	0.555882	0	0.112244	0	0
XLOC_015200	DHHC-type zinc finger family protein isoform 2 [Theobroma cacao]	15.1949	16.1414	16.0577	16.0564	15.1453	15.9823	21.9013	18.4997	19.9311	20.8378	21.1778	22.1354	23.1182	26.6018	20.2825	22.3235	15.4696	26.2905	15.309	16.2737	19.4212
XLOC_007311	Protein SYM1 [Triticum urartu]	0	0	0	0	0	0	1.10427	0.711704	0	0	0	0	0	0	0	0	0	0	0	0	0
XLOC_060205	PREDICTED: probable inactive receptor-like protein kinase At3g56050-like isoform X2 [Setaria italica]	1.66132	3.04496	2.42514	1.47296	2.57868	2.49917	1.76737	1.2879	13.6952	19.7794	6.87342	13.3891	16.8519	1.16003	1.93902	2.13438	2.07237	0.930133	33.6188	15.6735	7.48347
XLOC_067396	PREDICTED: probable beta-1,4-xylosyltransferase IRX9H-like [Cucumis sativus]	5.35994	4.90075	5.06113	6.57246	4.30132	4.9673	7.55654	4.214	10.4833	7.9623	8.38478	8.12348	6.39827	6.71845	6.42875	12.2949	7.89679	10.4178	9.01549	10.8968	11.5213
XLOC_028075	PREDICTED: uncharacterized protein LOC101309528 [Fragaria vesca subsp. vesca]	0.326528	0	0.41418	3.66575	1.7262	0.385	1.92637	1.05278	4.54567	0.215506	0.196895	0	0.0443955	0.0682456	0.67945	0	0.872615	0	2.81452	0.488401	0.345778
XLOC_082562	PREDICTED: uncharacterized protein LOC101311406 [Fragaria vesca subsp. vesca]	10.2879	8.94002	13.352	13.1836	5.99404	12.7853	18.1875	10.1137	7.75407	17.8632	19.3127	13.8634	15.9286	4.70922	9.35156	34.4158	34.596	25.0679	5.82515	15.5341	9.81803
XLOC_028269	hypothetical protein VITISV_005397 [Vitis vinifera]	46.8482	67.9292	50.1999	74.2388	42.0438	25.7114	128.672	40.7142	97.7185	349.173	560.113	472.39	349.982	162.437	58.1628	83.1986	82.2429	53.0251	88.577	113.141	39.8741
XLOC_080233	PREDICTED: uncharacterized protein LOC101755558 [Setaria italica]	13.872	15.443	15.059	14.5843	15.7523	13.7736	21.4793	12.7427	18.8391	20.756	21.1472	18.0382	17.7543	31.8204	37.9292	2.76296	2.14076	1.6134	7.48631	20.1634	19.9847
XLOC_023782	PREDICTED: glyoxysomal fatty acid beta-oxidation multifunctional protein MFP-a-like [Setaria italica]	32.4679	24.642	27.377	35.1812	27.2255	23.7851	40.744	20.0808	16.1408	34.4666	50.4444	42.9417	48.7895	27.0398	26.5987	3.97924	1.67553	1.49413	14.4514	8.16286	36.0361
XLOC_000581	Vacuolar sorting protein 9 domain containing protein, expressed [Oryza sativa Japonica Group] >gi|215697833|dbj|BAG92026.1| unnamed protein product [Oryza sativa Japonica Group]	3.31448	4.66883	4.6489	4.06089	4.30541	3.64264	5.49578	6.10279	7.71895	9.7194	8.29791	9.27791	9.6374	4.47123	7.10485	4.06954	2.21975	1.71591	2.98734	0.971141	0.717854
XLOC_069595	F-box/WD repeat-containing protein 4 [Theobroma cacao]	2.10961	1.51832	1.49439	1.91261	1.4525	2.36628	4.69188	7.21253	11.2105	4.11608	5.118	3.81346	3.41118	60.2642	29.1566	36.7842	35.2299	36.7553	19.3353	7.66123	9.39716
XLOC_072504	Coiled-coil domain-containing protein 18, putative isoform 2, partial [Theobroma cacao]	0	0	0	0	0	0	72.921	2.6217	0	0	0	0	0	0	0	0	0	29.5336	1.00595	21.7308	5.89482
XLOC_078221	Interactor of constitutive active ROPs 2 [Theobroma cacao]	7.80025	9.29288	4.28147	6.06684	12.094	4.50759	0	0	5.81902	2.3347	1.35162	0.258161	3.59251	0.733972	0.398779	2.30879	6.79829	11.2673	6.29178	8.03503	3.99583
XLOC_033664	PREDICTED: uncharacterized protein LOC101203266 [Cucumis sativus] >gi|449521146|ref|XP_004167591.1| PREDICTED: uncharacterized LOC101203266 [Cucumis sativus]	0.176792	0.171498	0.4063	0.126154	0	0.120498	5.78967	0.228702	0	0	0	0	0	5.27151	3.1332	0	0	0.766531	0	0.336967	0
XLOC_085122	elongation factor 1-alpha 1 [Elaeis guineensis]	429.497	347.399	299.032	508.051	372.5	316.294	537.64	515.114	165.662	243.78	287.022	241.41	158.568	244.959	334.211	143.368	171.268	153.63	239.64	379.18	514.825
XLOC_010609	endoplasmic reticulum [ER]-type calcium ATPase [Populus trichocarpa] >gi|222861455|gb|EEE98997.1| endoplasmic reticulum [ER]-type calcium ATPase [Populus trichocarpa]	8.44932	9.13008	11.4369	11.7355	8.90837	10.2546	20.6244	17.2381	29.5531	40.0003	44.9948	40.1208	51.2941	22.5577	16.3079	2.95027	1.48782	5.26406	28.3756	9.32112	12.4572
XLOC_060399	PREDICTED: filament-like plant protein 4-like isoform X1 [Setaria italica] >gi|514820661|ref|XP_004985017.1| PREDICTED: filament-like plant protein 4-like isoform X2 [Setaria italica]	8.18329	9.13225	9.28442	12.4133	7.45218	11.9928	6.25195	12.8167	48.6578	46.5401	43.2033	61.9829	68.8128	7.12647	10.2074	1.67272	1.32189	0.995797	14.6263	10.1839	13.5927
XLOC_047097	PREDICTED: uncharacterized protein LOC101296656 [Fragaria vesca subsp. vesca]	14.653	14.9409	18.3852	16.31	15.0389	17.5283	16.2011	15.2829	42.3467	56.8155	49.8998	55.8304	49.4873	176.852	31.0801	8.2809	8.14053	7.06395	14.0911	13.0342	9.66612
XLOC_055687	Rubisco methyltransferase family protein, putative [Theobroma cacao]	2.44411	2.26802	1.78634	2.55646	3.32352	3.56587	5.31298	2.52852	1.97323	1.81225	2.66301	2.13102	2.46125	3.30504	11.4954	9.14726	9.14726	3.10946	1.67009	2.13436	2.24857
XLOC_050051	unknown [Lotus japonicus]	0.501139	0	0	0	0	0	0	0	0	0	0	0	0	8.73229	0.525212	0	0	0	4.00124	5.63276	7.1155
XLOC_004426	PREDICTED: glyoxysomal fatty acid beta-oxidation multifunctional protein MFP-a-like [Fragaria vesca subsp. vesca]	14.0678	13.5642	13.7681	15.8875	13.2623	11.3419	26.1556	14.0029	0	0	0	0	0	0	0	0	0	0	0	0	0
XLOC_027054	eukaryotic translation initiation factor 2c, putative [Ricinus communis] >gi|223532851|gb|EEF34625.1| eukaryotic translation initiation factor 2c, putative [Ricinus communis]	163.278	141.302	114.885	189.361	156.216	112.087	41.8059	45.9102	101.623	118.014	108.113	100.536	88.8365	47.633	35.7583	6.5614	3.31227	4.15448	19.7646	54.7471	50.5559
XLOC_000739	Os09g0323500 [Oryza sativa Japonica Group] >gi|48716989|dbj|BAD23681.1| unknown protein<similar to Oryza sativa chromosome 4, OSJNBa0017B10.5 [Oryza sativa Japonica Group] >gi|113631104|dbj|BAF24785.1| Os09g0323500 [Oryza sativa Japonica Group] >gi|125563232|gb|EAZ08612.1| hypothetical protein OsI_3...	7.69274	7.73016	6.95527	7.86815	6.9296	7.88182	15.0756	10.6505	15.9811	6.29688	10.157	7.1038	6.32291	9.29456	8.57487	1.51151	6.50512	4.38385	3.65055	3.28641	7.04649
XLOC_017822	DNA ligase I, putative [Ricinus communis] >gi|223532518|gb|EEF34307.1| DNA ligase I, putative [Ricinus communis]	39.8042	50.4889	50.2736	150.048	111.96	61.0649	0	7.08333	38.373	14.6794	29.9081	76.802	0	0	18.7888	35.8951	0	0	0	4.90568	0
XLOC_003827	hypothetical protein VITISV_038963 [Vitis vinifera]	12.4023	9.48687	11.6499	9.07904	10.1258	8.43666	2.86748	2.48757	34.6497	47.0134	39.8881	50.1023	49.4026	17.0478	12.9439	1.22636	1.79172	1.53628	5.01059	12.3805	23.3655
XLOC_052610	PREDICTED: NADPH:quinone oxidoreductase [Vitis vinifera] >gi|296087867|emb|CBI35123.3| unnamed protein product [Vitis vinifera]	1.39494	1.90407	1.19117	0.891857	1.83523	2.55052	13.1231	21.349	0	0	0.188465	0	0.0837044	0	0.546973	0	1.27866	0	0	0	0.0320445
XLOC_039548	hypothetical protein TRIUR3_35080 [Triticum urartu]	3.9733	4.14167	5.30189	6.00926	4.85928	4.88966	29.7056	15.9664	0.15998	0.315867	0.321034	0.385295	0.488521	1.30365	2.78652	0	1.75389	0.701749	1.47183	3.28104	2.43028
XLOC_026316	calmodulin binding protein, putative [Ricinus communis] >gi|223543714|gb|EEF45242.1| calmodulin binding protein, putative [Ricinus communis]	2.46101	2.06519	2.11506	3.45504	3.90437	3.78175	9.15171	6.36996	2.60804	2.67435	4.08294	4.59058	3.6475	13.5765	9.75225	14.3055	14.3966	12.9599	11.0363	10.2899	12.3698
XLOC_074643	hypothetical protein SORBIDRAFT_08g017700 [Sorghum bicolor] >gi|241944028|gb|EES17173.1| hypothetical protein SORBIDRAFT_08g017700 [Sorghum bicolor]	5.87866	5.33144	5.72501	4.76835	4.49113	4.76387	3.65181	3.12994	4.45367	5.39077	5.29243	7.4442	6.38229	1.82255	1.68872	1.98551	0	0	1.85735	2.48938	4.03706
XLOC_009741	ATPase, V1 complex, subunit B protein isoform 3 [Theobroma cacao] >gi|508774014|gb|EOY21270.1| ATPase, V1 complex, subunit B protein isoform 3 [Theobroma cacao]	4.76606	47.0409	0	0	0	3.67769	1319.71	188.325	0	0	15.051	13.879	55.698	40.6575	0	0	0	0	1.68102	0	0
XLOC_003858	PREDICTED: uncharacterized protein LOC100257657 [Vitis vinifera] >gi|147835619|emb|CAN68554.1| hypothetical protein VITISV_017460 [Vitis vinifera]	4.78597	5.32852	7.46229	4.14174	4.70007	5.7063	16.5714	3.33741	3.64511	2.82091	0.521482	0.798482	0.948582	2.08583	0.306716	6.20297	5.09892	8.12267	2.02012	1.78258	1.52927
XLOC_057026	hypothetical protein OsI_39206 [Oryza sativa Indica Group]	7.74217	13.4208	20.5483	6.64806	11.653	10.5722	68.96	51.6134	10.0973	13.9637	11.1578	12.4904	13.8818	16.4422	46.8316	0	0	0	42.4001	3.13761	4.04059
XLOC_088327	hypothetical protein PRUPE_ppa020114mg [Prunus persica]	2.12792	2.43338	1.61731	1.30733	2.29475	2.66218	2.49119	1.14149	5.66204	4.49838	5.00065	8.0949	6.6191	5.38633	15.6356	2.21249	4.42497	4.97772	2.60936	4.25904	4.16316
XLOC_082774	hypothetical protein OsJ_15258 [Oryza sativa Japonica Group]	5.79322	6.30922	6.42849	6.77184	7.27582	7.63047	10.8339	14.3232	6.88039	4.93038	5.52911	3.97047	6.81909	6.34822	7.50853	15.327	14.9258	13.9535	25.0851	3.27526	4.39269
XLOC_084157	hypothetical protein OsI_29529 [Oryza sativa Indica Group]	1.37851	1.57014	3.11375	1.97239	2.29692	2.04904	5.45138	3.9296	0.739109	1.83206	1.48728	1.46857	0.785192	0.888517	2.39816	2.95996	1.09107	2.91966	3.39404	0.953867	1.75701
XLOC_078541	PREDICTED: probable protein phosphatase 2C 5-like [Brachypodium distachyon]	9.63134	16.8076	13.0611	9.21128	14.2043	11.5675	1.39775	8.31966	0.396549	18.5512	17.2148	18.5834	28.8873	129.593	79.6321	58.614	68.3957	47.2733	5.9649	28.2237	17.0292
XLOC_060474	PREDICTED: DNA-directed RNA polymerase II subunit RPB7-like [Brachypodium distachyon]	15.7293	17.9946	12.386	15.04	19.5483	18.0004	14.8063	16.9041	19.7271	28.8063	29.7036	26.7027	22.3114	30.4953	39.3149	0	2.44158	1.22429	6.50184	13.8398	18.2702
XLOC_050182	predicted protein [Populus trichocarpa] >gi|222853317|gb|EEE90864.1| predicted protein [Populus trichocarpa]	0.966544	0.639662	0.433968	0.601748	0.622242	0.556407	0.593121	0.538559	15.2117	10.3505	12.0404	10.0816	9.15119	2.6493	1.57719	1.4991	0.97175	0.524439	2.91958	5.28838	2.65375
XLOC_038760	unnamed protein product [Vitis vinifera]	1.29553	0.829192	1.81694	1.58613	1.82955	1.50197	23.4893	13.8846	0	2.8067	4.85099	5.85943	5.80044	3.48836	2.75354	12.2609	7.24552	15.4834	62.5974	15.9868	16.5702
XLOC_000200	PREDICTED: uncharacterized protein LOC100836736 [Brachypodium distachyon]	8.74305	8.17545	8.39576	9.50119	5.06306	5.45929	13.3459	7.00324	5.40295	5.13366	7.08442	12.3961	7.85001	0.276453	2.40866	2.26873	4.61313	0	5.17943	0.7357	1.9554
XLOC_053808	PREDICTED: probable inactive purple acid phosphatase 27-like [Vitis vinifera]	0.0802774	0.146153	1.30851	0.108762	0.0617916	0.460833	2.91692	3.61932	0	0.226961	0.231791	0.844111	0.352176	0.666393	0.146536	0	0	0	2.00273	6.98458	11.2734
XLOC_045213	hypothetical protein ARALYDRAFT_894885 [Arabidopsis lyrata subsp. lyrata] >gi|297333164|gb|EFH63582.1| hypothetical protein ARALYDRAFT_894885 [Arabidopsis lyrata subsp. lyrata]	0.882668	0.943741	15.405	0.550021	0.472525	1.44953	17.4502	14.5277	0	0	0	0.348123	0.415276	0.164974	0	0	0	0	1.43378	1.7262	2.03906
XLOC_009357	hypothetical protein SORBIDRAFT_06g030050 [Sorghum bicolor] >gi|241939791|gb|EES12936.1| hypothetical protein SORBIDRAFT_06g030050 [Sorghum bicolor]	13.872	13.2673	10.4549	17.0352	13.0245	10.879	3.32701	2.51769	3.43205	1.85552	1.86348	2.0371	2.72143	10.9198	2.63247	0	0	0.378577	1.23559	0.0580293	0
XLOC_020979	PREDICTED: uncharacterized protein LOC100266895 [Vitis vinifera]	1.72884	0.976607	0.297658	2.72029	1.29373	0.487835	0	0	2.24638	3.84372	4.64435	4.1156	1.92943	0.104767	0.0485976	0	0	0	1.62188	0.160014	0.147382
XLOC_001708	PREDICTED: NADPH--cytochrome P450 reductase-like [Setaria italica]	24.4704	27.037	36.3369	26.2366	22.4542	32.0898	111.687	148.482	57.6782	33.1906	37.0087	43.5376	36.0173	121.103	109.781	26.2987	34.2079	29.4923	37.0901	119.595	134.718
XLOC_008929	hypothetical protein [Zea mays] >gi|194706152|gb|ACF87160.1| unknown [Zea mays] >gi|413950306|gb|AFW82955.1| hypothetical protein ZEAMMB73_160675 [Zea mays]	8.67246	8.3257	6.38915	9.6842	10.5851	8.1606	14.4823	9.32691	0	0	0	0	0	0	0	0	0	0	0	0	0
XLOC_082743	omega-3 fatty acid desaturase [Nicotiana tabacum] >gi|21668486|dbj|BAC01274.1| plastid omega-3 fatty acid desaturase [Nicotiana tabacum]	9.70063	9.38476	15.4062	10.0078	9.27468	8.36983	18.0209	14.3309	17.7204	9.03046	8.90665	10.5947	7.87884	26.6767	22.4103	13.3221	11.1548	11.1887	25.6888	9.12125	11.7854
XLOC_021464	hypothetical protein VITISV_043351 [Vitis vinifera]	0	0	0	0	0	0	0	0	0	0	0	0	0	0	0	0	0	0	0	2.66482	2.1742
XLOC_050468	protein phosphatase 2C (PP2C) [Fagus sylvatica]	8.23315	7.70112	7.20961	7.27902	6.95595	7.13177	14.6559	8.16422	0	0	0	0	0.100393	0	0	0	0	0	0	0.125982	0
XLOC_049363	predicted protein [Hordeum vulgare subsp. vulgare]	1.05166	0.563829	1.70896	0.777813	0.772453	1.22258	30.3843	7.01237	0.393266	5.65801	3.77523	2.9282	2.14444	0.774571	0.417819	1.385	0	10.5542	1.87043	9.28933	11.3394
XLOC_014551	hypothetical protein VITISV_008337 [Vitis vinifera]	10.4597	11.2498	12.546	10.9107	12.6406	10.4151	1.55374	0.824828	14.8531	28.5882	22.8675	27.4369	29.6826	36.2241	12.3754	19.7135	4.82969	24.0902	8.34224	22.5796	16.5573
XLOC_017324	unknown [Glycine max]	63.9561	56.3446	53.893	67.3346	57.9076	51.2392	39.6433	34.3047	29.7225	53.741	63.72	69.8961	61.1368	52.3166	41.8322	23.3956	18.9902	22.2312	70.5603	87.2077	127.27
XLOC_083602	PREDICTED: geminivirus Rep-interacting motor protein-like [Cucumis sativus]	25.9257	32.4561	31.2189	25.0062	27.0373	26.2283	13.8517	9.48963	13.3212	24.6051	24.9681	27.0946	25.8172	27.428	30.1773	20.3085	31.1786	22.1037	7.13963	4.46457	7.0444
XLOC_086347	PREDICTED: uncharacterized protein LOC101767723 isoform X3 [Setaria italica]	51.8827	59.94	64.4145	54.5642	55.4272	59.9535	1676.25	254.76	704.082	437.66	609.934	496.827	453.07	1496.95	986.264	1094.72	1182.32	1042.73	5708.3	2427.59	2117.07
XLOC_032019	serine/threonine-protein kinase [Glycine max] >gi|223452434|gb|ACM89544.1| serine/threonine-protein kinase [Glycine max]	19.4284	20.6438	16.3097	22.7572	17.6718	19.1029	14.6301	21.4556	16.828	19.5497	25.3289	25.5956	21.4417	11.2409	11.7557	23.6571	19.1503	15.2482	16.7929	18.139	22.957
XLOC_016312	PREDICTED: uncharacterized protein LOC101248571 [Solanum lycopersicum]	3.41859	5.4254	3.66429	3.70525	2.73704	1.27009	0	0.20809	69.9163	21.6644	19.0613	18.6999	19.322	5.33506	0	0	2.56611	1.17924	2.3076	2.61984	1.36922
XLOC_091140	hypothetical protein M569_17056 [Genlisea aurea]	9.55129	7.72148	6.89597	7.56633	6.4135	7.24098	8.85589	4.49794	20.7763	24.4395	18.7375	22.2527	17.0654	12.6498	9.76747	0.77659	0	2.28396	7.54719	8.59067	15.4347
XLOC_064172	PREDICTED: oligopeptide transporter 4 isoform 1 [Vitis vinifera]	13.5242	8.30357	8.02365	11.5523	6.24398	8.56869	16.4808	13.6934	4.50548	4.32621	2.72355	3.74309	4.19717	8.20902	7.05428	3.12209	1.56133	3.95246	13.8263	20.0989	15.1118
XLOC_020410	hypothetical protein VITISV_014954 [Vitis vinifera]	29.874	20.5653	25.4437	35.2558	30.3531	17.7699	14.1129	10.176	116.663	96.9045	139.299	142.79	75.2373	71.3411	16.3226	0	0	0	13.5207	13.6578	25.77
XLOC_044599	PREDICTED: UDP-glycosyltransferase 87A2-like [Setaria italica]	1.61239	1.68295	2.89174	1.11255	0.939599	2.94009	5.44161	4.00521	0.934229	0.938792	0.965467	0.168553	0.456386	0.484249	0.461489	0	0	0	0.972084	9.24727	10.2471
XLOC_037228	PREDICTED: uncharacterized protein LOC101223452 [Cucumis sativus]	0	0	0	0	0	0	0	0	6.16991	0	0.125612	0	0	1.68436	0.212188	0	0	0	0	0.243682	0.17555
XLOC_032232	unknown [Populus trichocarpa x Populus deltoides]	19.8712	34.5868	57.6688	14.9038	21.4933	41.2453	124.062	37.8279	5.09667	10.5059	12.2463	14.9382	11.9573	583.483	1779.37	342.68	438.415	346.04	116.367	63.9493	109.505
XLOC_069535	hypothetical protein OsI_23811 [Oryza sativa Indica Group]	9.18378	9.07753	13.8434	7.559	6.32021	8.72425	17.4706	14.7444	12.5234	17.2508	14.9619	18.448	17.0468	30.4355	34.3455	38.5618	35.7864	38.2505	6.09344	4.07512	5.44766
XLOC_051665	disease resistance protein [Brassica rapa subsp. pekinensis]	0.0336197	0	0	0.0905043	0	0	0	0	0	0.113897	0.0773389	0.14797	0.101495	0	0	0	0	0	0.355581	0.9244	1.14471
XLOC_047769	putative galactosyltransferase [Oryza sativa Japonica Group]	0	0	0	0	0	0	0	0	0	0	0	0	0	0	0	0	0	0	2.4607	0	0
XLOC_008289	PREDICTED: methyl-CpG-binding domain-containing protein 13-like isoform X1 [Setaria italica] >gi|514792529|ref|XP_004972593.1| PREDICTED: methyl-CpG-binding domain-containing protein 13-like isoform X2 [Setaria italica]	12.3978	12.6194	12.643	13.1733	13.324	9.55624	14.9252	12.2972	8.09257	8.98003	8.46365	9.74655	11.5935	5.96483	10.3205	10.0614	16.5241	13.504	4.88729	8.15817	9.6127
XLOC_011509	Chaperone protein DnaJ [Triticum urartu]	0	0	0	0	0	0	0.458871	0.718544	0	0	0	0	0	0	0	0	0	0	0.117441	0	0
XLOC_076204	hypothetical protein MTR_7g090230 [Medicago truncatula] >gi|124359980|gb|ABN07996.1| Thioredoxin fold [Medicago truncatula] >gi|355500049|gb|AES81252.1| hypothetical protein MTR_7g090230 [Medicago truncatula]	15.241	14.636	21.6885	40.9228	21.5916	19.1537	47.1234	11.8932	11.7002	21.5523	0	0	0	43.0025	47.0722	1219.51	1196.07	985.602	63.3415	74.4285	60.3708
XLOC_043364	PREDICTED: probable potassium transporter 11-like [Brachypodium distachyon]	1.03343	1.47083	1.91582	1.39384	0.825417	1.9603	3.66394	1.18505	0	0	0	0	0	0	0	0	0	0	0	0	0
XLOC_090204	PREDICTED: uncharacterized protein LOC101507528 [Cicer arietinum]	11.8213	11.4118	11.2605	16.6407	9.41756	14.2049	29.2263	20.2266	11.8551	12.9699	11.8342	11.7227	12.7627	14.8066	10.4919	70.499	61.6866	82.6225	27.849	25.2531	31.9062
XLOC_072528	PREDICTED: protein UNUSUAL FLORAL ORGANS [Vitis vinifera]	0	0	0	0	0	0	0	0	0.300983	0.448648	1.22773	1.17788	0.799695	0	0.273551	1.7907	0.895351	2.0585	0.599808	0.391716	0.47046
XLOC_008945	predicted protein [Populus trichocarpa] >gi|222871124|gb|EEF08255.1| predicted protein [Populus trichocarpa]	16.6016	19.5961	23.3132	20.3273	27.2311	24.4627	46.3697	22.8021	4.95849	11.2946	12.9807	9.73292	11.9332	22.3175	7.65541	9.07673	7.70677	6.44456	19.8114	8.52402	14.9268
XLOC_082793	hypothetical protein PRUPE_ppa015042mg [Prunus persica]	2.50851	1.85887	2.12755	2.25031	2.32682	1.61219	2.08328	3.3494	0.0206532	0.574386	0.509569	0.380043	0.414369	0.93892	1.11666	3.49113	2.95227	1.69191	2.91524	5.46296	6.49878
XLOC_065663	PREDICTED: alkylated DNA repair protein alkB homolog 8-like [Vitis vinifera]	16.7734	15.9776	15.2545	15.2081	17.8634	14.9779	10.4534	14.3267	12.0326	25.9148	27.5969	28.2417	28.8947	18.7973	14.892	1.82174	2.85885	1.85309	7.02057	7.60453	11.0207
XLOC_031965	hypothetical protein [Oryza sativa Japonica Group] >gi|56784090|dbj|BAD81419.1| hypothetical protein [Oryza sativa Japonica Group]	7.25047	9.14045	5.52642	6.98117	7.28751	7.26761	2.02128	2.86013	8.17046	3.61887	2.55032	1.74555	1.90399	1.70551	0.878075	0	1.0792	0	0.237445	0.288236	0
XLOC_079402	PREDICTED: DUF246 domain-containing protein At1g04910-like isoform 2 [Vitis vinifera]	5.28225	6.71747	6.85008	5.42816	4.59188	6.3587	6.61025	6.53921	5.1919	8.51337	8.00233	9.32211	10.202	6.34337	6.1101	2.43216	2.81689	0.653725	3.9553	7.45853	7.23332
XLOC_010623	ATP dependent Clp protease ATP-binding subunit ClpX1 [Cenchrus americanus]	17.3145	19.8984	17.5678	15.7372	17.2846	17.7265	94.0652	40.9435	18.7707	10.439	14.528	12.3444	10.581	27.7921	34.9534	93.2976	107.687	55.6804	44.1314	17.3614	20.089
XLOC_026338	PREDICTED: uncharacterized protein LOC101312274 [Fragaria vesca subsp. vesca]	717.632	1116.59	625.279	929.513	159.109	262.248	0	67.1028	0	46.8667	47.7107	42.1407	17.9753	0	52.4397	0	0	0	0	15.6316	12.2286
XLOC_046813	hypothetical protein VITISV_042360 [Vitis vinifera]	76.5511	124.947	96.3273	105.06	64.1547	41.6627	0	2.00341	14.5273	25.7039	43.4397	80.0975	46.3512	6.61901	4.20693	0	0	0	5.78715	0	7.8446
XLOC_047800	PREDICTED: tuftelin-interacting protein 11-like [Vitis vinifera]	4.72854	3.12984	2.62634	4.19189	2.60212	3.22344	3.53626	2.38337	2.66524	3.19325	3.95739	3.86482	2.50466	2.72046	4.15593	71.7397	50.3809	99.3079	6.90281	1.76946	2.36098
XLOC_081696	PREDICTED: putative F-box/LRR-repeat protein At5g02930-like [Vitis vinifera]	0.698316	0.871415	1.12399	0.990134	0.948048	0.478523	6.18145	3.53793	23.7974	11.5114	13.9574	16.6759	24.1041	6.86199	4.09403	0.660501	0.324962	0.752857	0.455958	0.526985	0.888749
XLOC_088060	PREDICTED: uncharacterized protein LOC100790420 [Glycine max]	4.81589	5.07327	3.23711	5.79216	5.25894	5.18729	2.43123	6.164	7.45992	7.30993	7.33973	8.33777	8.44197	9.69762	14.2626	6.45918	9.74665	6.00545	3.79536	2.98257	7.19367
XLOC_080240	PREDICTED: 60S ribosomal protein L38-like [Glycine max]	50.8003	51.9741	44.525	43.0907	63.17	42.8295	120.195	130.927	0.612053	1.37432	1.08005	0.691817	0.62562	0.320588	0.358243	2.78435	0	8.3189	7.37638	1.49277	0.192715
XLOC_068851	Os02g0137600 [Oryza sativa Japonica Group] >gi|42409129|dbj|BAD10379.1| putative methyltransferase [Oryza sativa Japonica Group] >gi|42409260|dbj|BAD10523.1| putative methyltransferase [Oryza sativa Japonica Group] >gi|113535362|dbj|BAF07745.1| Os02g0137600 [Oryza sativa Japonica Group] >gi|12553800...	1.71336	2.44151	2.81819	2.03586	1.22894	2.84996	2.3353	1.71838	1.13658	2.57808	0.811261	1.24989	1.88608	1.62056	10.9773	0	7.45e-06	1.67521	1.29779	1.36666	1.01693
XLOC_038832	PREDICTED: thioredoxin-like 4, chloroplastic [Vitis vinifera] >gi|302142316|emb|CBI19519.3| unnamed protein product [Vitis vinifera]	0	0	0	0	0	0	46.6848	21.3286	0	0	0	0	0	0.179501	0	33.8838	25.4128	21.4573	0	1.11181	1.17417
XLOC_023678	PREDICTED: NADH dehydrogenase [ubiquinone] iron-sulfur protein 1, mitochondrial [Vitis vinifera]	31.7287	28.9443	29.5806	40.7534	27.916	31.5728	43.667	30.2536	39.1306	46.9316	48.3632	50.4167	44.688	60.7149	49.3997	10.942	12.0064	15.5057	29.5609	33.4365	38.0265
XLOC_034220	TPA: hypothetical protein ZEAMMB73_073416 [Zea mays]	0.129039	0	0.0696541	0.216926	0.206049	0.0427973	0.159501	0.225804	0.878061	1.38291	1.11165	0.921543	0.81074	0.20697	0.211066	0	1.38425	0.356148	0.0426451	0.161496	0.0759145
XLOC_067438	Nucleotide pyrophosphatase/phosphodiesterase [Medicago truncatula] >gi|355509888|gb|AES91030.1| Nucleotide pyrophosphatase/phosphodiesterase [Medicago truncatula]	0.636938	0.492415	0.38912	0.978729	0.465427	0.599135	7.2271	4.92531	0	0.55305	1.93619	0.754851	0.752921	0.797377	0.0837347	0.964204	0	0.373195	0.288823	0.422002	0.328653
XLOC_071421	PREDICTED: protein TRANSPARENT TESTA 12-like [Setaria italica]	14.5573	14.7164	17.9329	14.8636	13.7694	15.2535	1.41414	1.7141	0.31438	3.73051	1.8485	1.53704	2.26314	0.538479	0.975485	7.04855	13.5026	12.3052	11.3757	15.07	11.7199
XLOC_003108	uncharacterized protein LOC100277126 [Zea mays] >gi|195639116|gb|ACG39026.1| hypothetical protein [Zea mays]	6.67336	8.37439	9.71258	8.10654	6.41441	6.26577	1.75703	0.413366	3.0003	1.78542	2.08855	0.607201	0.707552	0	0	0	0	0	3.18351	1.41042	2.33875
XLOC_070654	PREDICTED: LOW QUALITY PROTEIN: tRNA wybutosine-synthesizing protein 2/3/4-like [Fragaria vesca subsp. vesca]	0	0.00297549	0	0	0	0	0.212495	0.138674	0.118548	0.243016	1.74909	0.916162	1.29535	2.66088	0.794222	0	0	0	0	0.594704	1.78291
XLOC_000409	Cytokinin-O-glucosyltransferase 2 [Aegilops tauschii]	0.267818	0.458347	0.390893	0.374536	0.286719	0.398503	2.56091	1.42793	0	1.00819	0.215521	0.27311	0.1958	2.28058	3.71948	0.957399	1.84607	0.789051	4.00343	7.56018	6.8384
XLOC_086996	hypothetical protein OsJ_03780 [Oryza sativa Japonica Group]	1.55228	2.18788	2.88759	1.26937	2.15888	3.33231	7.70002	5.43705	9.22156	9.3348	8.92522	7.26308	7.15295	9.00911	19.9356	4.707	3.82179	7.65207	5.46955	2.09537	2.73406
XLOC_026354	putative chlorophyll a/b-binding protein [Phalaenopsis hybrid cultivar]	21.4542	81.9738	382.39	30.0045	43.0385	142.56	212.102	21.0459	1.30874	1.19431	0.0516227	1.68648	1.07708	1617.12	2498.59	907.857	705.409	875.026	68.1648	67.3556	106.077
XLOC_065636	PREDICTED: reticulon-like protein B12 [Vitis vinifera] >gi|297740256|emb|CBI30438.3| unnamed protein product [Vitis vinifera]	4.9227	7.6373	8.51395	6.62318	7.9514	10.9537	7.51289	9.26701	29.3306	43.158	47.8634	55.0645	56.1855	11.4036	15.646	9.28289	6.49898	12.3086	19.9266	12.5203	15.4023
XLOC_018169	afc, putative [Ricinus communis] >gi|223550416|gb|EEF51903.1| afc, putative [Ricinus communis]	2.73302	2.50334	2.12937	3.11357	2.13506	3.11475	9.80075	4.74707	4.44522	2.4878	2.75766	2.38946	1.98369	2.39619	1.09203	0	0.197139	0.265667	0.448983	0.985106	1.74658
XLOC_003191	hypothetical protein SORBIDRAFT_07g004990 [Sorghum bicolor] >gi|241940302|gb|EES13447.1| hypothetical protein SORBIDRAFT_07g004990 [Sorghum bicolor]	6.15795	5.07162	6.90656	4.74487	5.7137	5.4288	15.597	9.98056	0.206899	0.128802	0.91163	0.247061	0.731149	1.19317	0.382841	1.15287	0	0	1.79753	0.451889	0.136064
XLOC_028788	unnamed protein product [Vitis vinifera]	12.1299	10.3268	10.533	23.0469	14.1147	11.9073	5.96782	7.18452	11.1173	8.73728	13.2611	10.0595	10.473	5.12487	3.54642	0	0	3.53891	2.04139	0.91306	1.06663
XLOC_023655	unnamed protein product [Vitis vinifera]	8.35581	13.563	14.1942	9.00153	11.1333	12.665	11.3689	4.73239	4.27371	18.5464	22.343	15.9777	17.8288	16.4529	8.24903	2.78632	5.62566	6.3238	3.30626	4.1439	4.51893
XLOC_089442	hypothetical protein ARALYDRAFT_888250 [Arabidopsis lyrata subsp. lyrata] >gi|297335621|gb|EFH66038.1| hypothetical protein ARALYDRAFT_888250 [Arabidopsis lyrata subsp. lyrata]	1.54603	0.968566	2.56912	1.88437	1.28296	1.33359	6.523	4.35509	0.749853	3.65543	3.42716	4.33547	2.72123	3.27489	2.04441	1.73194	1.23118	3.59626	8.80041	5.36717	6.15307
XLOC_070126	hypothetical protein PRUPE_ppa015715mg, partial [Prunus persica]	0	0	0	0	1.77922	0.506428	0	0	0	4.37813	9.53267	6.91257	6.97362	0	0	0	0	0	0	0	0
XLOC_004000	PREDICTED: protein TRANSPARENT TESTA 12-like [Setaria italica]	0.692845	0.326344	0.180617	0.772277	0.646701	0.392931	0.302208	0.287899	0.497309	1.54044	1.25104	0.748056	0.976873	0.170811	0	0.317385	0	0	0.735585	0.554161	0.786776
XLOC_046273	PREDICTED: uncharacterized protein LOC100836081 [Brachypodium distachyon]	2.73198	5.84666	4.00595	1.64652	4.97877	6.32449	83.0391	51.6089	31.0479	22.207	26.8802	28.1314	22.2084	62.085	27.0546	35.913	51.6285	46.7925	12.5231	11.7845	13.8174
XLOC_039870	Transposon Ty3-G Gag-Pol polyprotein [Triticum urartu]	0	0	0	0	0	0.0705192	0	0	0	0.546145	1.17978	0.476051	0.108159	0.258538	0	0	0	0	0.140214	0.454326	0.422323
XLOC_005254	Uncharacterized protein isoform 2 [Theobroma cacao]	9.90985	7.34127	7.13151	8.97263	8.93444	8.76955	13.488	15.4034	16.8739	15.249	15.8506	16.242	11.9367	10.888	12.9096	3.64255	0	2.75412	3.21739	11.2559	17.3518
XLOC_052572	Putative clathrin assembly protein [Aegilops tauschii]	2.20914	2.17826	1.87566	2.20813	2.44769	2.23192	11.836	9.57235	12.2963	10.8139	12.2518	11.5551	12.663	12.0617	11.08	3.01991	4.24566	4.56725	14.9846	6.06883	9.69637
XLOC_049462	translation initiation factor eif-2b gamma subunit, putative [Ricinus communis] >gi|223537526|gb|EEF39151.1| translation initiation factor eif-2b gamma subunit, putative [Ricinus communis]	28.9721	30.2447	27.3013	32.0727	31.3227	28.9874	23.8746	22.0444	11.9142	18.7314	19.378	20.839	20.0415	18.0953	16.435	11.1198	9.00012	8.78159	22.0823	18.5831	23.3533
XLOC_084254	hypothetical protein PRUPE_ppa001637mg [Prunus persica]	14.2759	12.432	17.471	18.412	14.5688	10.3952	27.2845	14.1424	6.58518	34.0883	35.593	23.2538	25.8987	12.5775	23.4357	12.2863	4.2522	7.38756	15.1344	14.0699	9.99574
XLOC_048877	PREDICTED: mitochondrial-processing peptidase subunit alpha [Vitis vinifera] >gi|297743169|emb|CBI36036.3| unnamed protein product [Vitis vinifera]	129.072	113.613	100.604	127.39	104.684	103.606	28.4753	50.214	60.2615	74.534	71.4144	80.0193	58.3611	37.7767	64.8036	27.2884	21.7016	22.2997	26.5276	49.0289	51.8875
XLOC_029034	Uncharacterized protein isoform 2, partial [Theobroma cacao]	12.0989	6.25389	4.10452	12.5574	7.39757	4.27653	5.41789	3.48395	2.84189	5.4455	2.93321	2.96189	2.89296	3.99418	4.06081	0.471898	1.39252	1.37879	1.18695	11.4974	13.5499
XLOC_081261	PREDICTED: potassium channel KAT1-like [Fragaria vesca subsp. vesca]	0.311661	0.741033	0.422693	0.274958	0.625639	0.129501	5.42482	3.18255	0.840543	3.15527	3.20668	3.31448	4.9478	2.6176	4.28766	0	0	0	0.433905	0	0
XLOC_077128	hypothetical protein SORBIDRAFT_04g003500 [Sorghum bicolor] >gi|241931373|gb|EES04518.1| hypothetical protein SORBIDRAFT_04g003500 [Sorghum bicolor]	16.7403	19.1028	14.5664	29.2998	20.9486	20.7677	8.20706	12.7263	1.30882	7.60128	8.48755	14.4404	13.3257	8.10801	8.0223	10.8955	5.50693	4.29044	5.54445	8.15637	9.62262
XLOC_040244	uncharacterized protein LOC100527776 [Glycine max] >gi|255633184|gb|ACU16948.1| unknown [Glycine max]	0.330697	0.642976	1.52711	0.736303	0	0	130.47	39.1946	15.6507	21.4074	28.4749	22.0133	28.4632	17.1404	6.4361	144.132	288.358	104.605	21.9188	21.2767	15.1768
XLOC_023979	PREDICTED: serine/threonine-protein kinase HT1-like [Fragaria vesca subsp. vesca]	1.02211	0.973387	0.974145	1.22777	1.32277	1.43692	2.0358	1.3634	0.219481	0.148562	0.764533	0.443859	0.810634	1.14857	2.49724	0	0	3.54817	0.761234	0.980061	1.89506
XLOC_071799	predicted protein [Populus trichocarpa] >gi|222843152|gb|EEE80699.1| predicted protein [Populus trichocarpa]	11.7311	6.65492	17.1284	11.908	15.7567	14.004	164.217	25.2477	1.07244	18.1277	28.0066	8.49651	38.1084	2.80288	2.88788	13.9282	41.7836	36.705	20.9456	13.4057	6.30544
XLOC_026495	Rho termination factor, putative [Theobroma cacao]	44.1854	50.9509	48.1804	47.4998	50.4598	44.6005	37.482	27.1872	10.6458	21.5278	22.1476	27.0709	21.1476	23.8546	41.3771	28.2414	29.2005	21.0967	21.3781	15.2088	21.9618
XLOC_009885	sulfate transporter [Vitis rupestris]	4.97043	5.59773	4.32196	6.61237	6.0857	3.96796	2.37242	5.05385	1.02073	2.10231	1.40741	1.93281	0.893332	0.165701	0.864598	0	1.17902	0	0.32169	1.37173	0.560152
XLOC_016263	1-aminocyclopropane-1-carboxylic acid oxidase [Elaeis guineensis]	0.396713	0.275524	0.521615	0.152593	0.649355	0.285263	1.17601	0.755396	6.14365	2.42716	3.46562	2.06222	2.34878	5.62345	4.52437	2.95944	4.1111	3.52545	0.069492	4.516	5.05543
XLOC_079815	Os05g0421300 [Oryza sativa Japonica Group] >gi|48475180|gb|AAT44249.1| putative tetratricopeptide repeat (TPR)-containing protein [Oryza sativa Japonica Group] >gi|113579133|dbj|BAF17496.1| Os05g0421300 [Oryza sativa Japonica Group] >gi|215737118|dbj|BAG96047.1| unnamed protein product [Oryza sativa...	19.3227	18.659	10.2611	8.48411	15.3882	14.1019	14.6908	14.2817	17.5542	43.8306	55.6127	54.4685	33.9633	48.8529	19.9416	4.48943	0	0	3.81586	7.42654	10.4699
XLOC_053753	unnamed protein product [Vitis vinifera]	1.72756	1.60414	1.18179	2.72855	1.77589	1.96186	2.17034	2.35265	3.69462	7.47832	6.61599	7.03455	7.25826	5.06079	4.40235	0.544742	0.269738	2.06403	4.20879	2.97394	4.27459
XLOC_050573	PREDICTED: KAT8 regulatory NSL complex subunit 3-like [Setaria italica]	16.2262	18.3012	9.93194	19.8983	21.5294	13.4484	5.02984	8.91467	2.17695	0	0	1.95197	0.713241	0	0	0	0	0	0.50015	6.30404	4.55464
XLOC_016682	Os08g0483200 [Oryza sativa Japonica Group] >gi|42408160|dbj|BAD09298.1| putative RNA-binding protein cp33 [Oryza sativa Japonica Group] >gi|113624042|dbj|BAF23987.1| Os08g0483200 [Oryza sativa Japonica Group] >gi|125561943|gb|EAZ07391.1| hypothetical protein OsI_29641 [Oryza sativa Indica Group] >gi...	6.60463	8.13996	9.17722	7.23047	7.39236	8.06024	8.37559	5.76175	0.205879	0.661865	0.837804	0.995848	0.485944	7.25768	6.66372	2.52587	0.971195	1.18821	1.46822	4.63212	5.52758
XLOC_063556	unknown [Zea mays] >gi|414872103|tpg|DAA50660.1| TPA: rhomboid family protein [Zea mays]	6.06016	5.88582	5.73045	6.3257	6.03831	5.18233	0.288703	2.83873	4.80933	6.17973	6.4646	6.90787	10.0773	2.33354	0.974369	13.5597	21.536	15.3064	3.10491	7.81676	4.82248
XLOC_029764	PREDICTED: probable inactive poly [ADP-ribose] polymerase SRO2-like [Solanum lycopersicum]	0.0848024	0	0	0.235781	0	0.11365	1.31585	22.4407	0	0	0	0	0	0	0	0	0	0	0	2.41861	1.88929
XLOC_091954	hypothetical protein OsJ_01565 [Oryza sativa Japonica Group]	41.4431	49.677	71.3685	59.7256	26.2852	55.4694	6.57672	4.90143	38.7168	139.519	443.82	331.275	132.413	67.7458	6.19247	11.0325	11.0325	10.7259	56.7344	4.82672	9.33213
XLOC_004664	transparent testa glabra 1 [Rosa rugosa]	0.336709	0.147304	1.03949	0.484693	1.01006	0.482687	7.62677	3.2517	0	2.88797	3.03492	0.899701	1.24285	5.50741	0.569795	0	0	0	6.29955	1.33948	0.38167
XLOC_089516	Uncharacterized protein isoform 1 [Theobroma cacao]	6.00812	6.90257	5.41292	5.71753	6.13947	4.39486	5.0576	4.19984	14.4199	3.34282	3.89447	3.48136	2.53891	4.2456	8.83189	18.2852	13.5892	15.8605	3.52873	7.96552	9.0087
XLOC_048941	PREDICTED: uncharacterized protein LOC100258667 [Vitis vinifera] >gi|296085885|emb|CBI31209.3| unnamed protein product [Vitis vinifera]	6.23287	8.79544	5.10738	6.53947	6.76302	7.36364	7.85264	5.36857	4.574	4.96853	4.34114	5.10921	3.64782	2.46614	5.20383	0	0	0	1.18115	2.54186	3.04076
XLOC_039806	P-loop containing nucleoside triphosphate hydrolases superfamily protein isoform 2 [Theobroma cacao]	0.495149	0.58399	0	0.754259	0.656135	0.154359	3.43981	2.67501	4.86838	3.27428	1.39787	1.57766	1.55668	2.52994	1.3335	1.52368	1.45096	0.876877	1.26341	0.512761	0.608938
XLOC_090812	unnamed protein product [Vitis vinifera]	16.1657	16.0543	16.6518	16.2458	16.2197	14.7887	36.9794	12.0757	6.61251	17.3726	18.1979	17.9672	18.4933	40.6128	68.562	12.586	9.349	8.5727	6.06761	9.86022	9.15457
XLOC_032226	proline oxidase [Zea mays] >gi|195612286|gb|ACG27973.1| proline oxidase [Zea mays]	0.91267	1.36834	1.5623	1.32755	1.06173	1.76758	1.56986	2.29859	0	0.460581	0.430837	0.178368	0.054862	0.528956	2.13612	0	1.82709	0	0.938454	2.7156	6.66511
XLOC_049157	Os01g0385400 [Oryza sativa Japonica Group] >gi|21743361|dbj|BAC03353.1| C4-dicarboxylate transporter-like protein [Oryza sativa Japonica Group] >gi|21952874|dbj|BAC06289.1| C4-dicarboxylate transporter-like protein [Oryza sativa Japonica Group] >gi|113532630|dbj|BAF05013.1| Os01g0385400 [Oryza sativ...	0	0	0	0.22168	0	0	1.41332	2.02266	1.86162	2.21564	1.92104	1.9057	12.509	2.99216	4.30518	0.958919	0.923091	0	0	22.367	15.3137
XLOC_006538	PREDICTED: probable importin-7 homolog [Brachypodium distachyon]	82.8873	83.3411	75.3228	114.236	104.276	90.8508	145.351	111.952	75.4146	167.733	195.144	188.007	157.438	166.481	143.189	108.856	102.108	112.653	85.1244	64.2206	88.5619
XLOC_070262	endo-1,4-beta-glucanase [Allium sativum f. pekinense]	9.97082	7.79239	2.98229	10.8805	10.8636	5.0099	0.268675	0.10815	0	0.0960983	0.672853	6.32e-05	0.266249	0	0	1.04888	0	0	2.48919	0.663234	2.10875
XLOC_002239	cytidine/deoxycytidylate deaminase family protein [Arabidopsis thaliana] >gi|91806546|gb|ABE66000.1| cytidine/deoxycytidylate deaminase family protein [Arabidopsis thaliana] >gi|332644907|gb|AEE78428.1| cytidine/deoxycytidylate deaminase family protein [Arabidopsis thaliana]	7.94303	5.95885	11.0028	8.6341	7.63751	8.9643	12.5529	13.7648	0.339623	0.496491	0.514303	0.35124	0.919296	0	0	1.84816	0	0	0.775846	0.326388	0.0709765
XLOC_078060	dead box ATP-dependent RNA helicase, putative [Ricinus communis] >gi|223551255|gb|EEF52741.1| dead box ATP-dependent RNA helicase, putative [Ricinus communis]	3.88671	4.03024	9.95291	6.33953	7.95764	2.26383	3.82454	7.05362	21.1223	11.5277	11.8417	18.303	13.4652	27.1173	10.246	24.502	63.3843	9.74755	4.25594	21.7973	2.89881
XLOC_045670	serine/threonine protein kinase, putative [Ricinus communis] >gi|223539693|gb|EEF41275.1| serine/threonine protein kinase, putative [Ricinus communis]	1.52815	0.727305	0.879325	1.15878	0.869472	1.27374	0	0	14.3874	7.46717	6.1741	7.57039	5.93333	3.45709	1.42944	4.18723	2.30689	3.02435	1.00105	0.797624	0
XLOC_038975	Phytoene desaturase protein [Medicago truncatula] >gi|355490784|gb|AES71987.1| Phytoene desaturase protein [Medicago truncatula]	6.40102	7.22969	9.96207	8.55414	8.74211	8.18086	15.4948	8.65449	12.0188	5.14901	5.82802	7.78204	7.84833	27.7995	73.3093	8.08907	3.22862	5.60668	8.45669	10.112	13.4752
XLOC_006163	predicted protein [Populus trichocarpa] >gi|222833364|gb|EEE71841.1| predicted protein [Populus trichocarpa]	3.48773	3.98828	7.42235	4.11429	4.24979	6.80581	105.793	54.3449	7.27064	7.47738	7.83915	9.00267	11.0246	18.6894	30.643	17.1302	13.0343	26.0888	34.0449	9.4241	14.3097
XLOC_041929	PREDICTED: nuclear pore membrane glycoprotein 210-like isoform X2 [Setaria italica]	42.0088	42.8033	27.1393	41.1271	41.8667	30.4776	15.8124	23.3565	56.5188	57.4618	63.2697	59.6831	42.9441	19.1787	15.3636	0	2.2398	2.39288	23.9733	27.3999	33.6202
XLOC_020755	PREDICTED: phospholipase D delta-like isoform 2 [Brachypodium distachyon]	29.111	22.0222	46.6464	26.8336	17.5697	18.5517	26.4265	12.3656	0	7.95701	15.9563	21.5698	27.1156	17.2226	31.8591	10.7802	10.875	0	6.24985	29.8868	29.8003
XLOC_067953	PREDICTED: putative glycerol-3-phosphate transporter 1-like [Brachypodium distachyon]	3.53509	4.97426	5.57339	3.6798	4.34749	7.13694	136.996	23.2311	8.93831	9.60181	9.58602	9.46336	16.4183	37.4671	35.4154	83.4242	97.2836	70.0591	26.7465	137.835	162.683
XLOC_079752	hypothetical protein ZEAMMB73_972004 [Zea mays]	0	0	0.643987	0	0	0	10.8349	10.4823	0	0	0	0	0	0	0	0	0	0	0	0	0
XLOC_085848	PREDICTED: probable pectinesterase/pectinesterase inhibitor 51-like [Vitis vinifera]	0.498434	1.59877	3.52972	3.14138	4.59669	5.0684	2.70517	0.643799	1.32577	2.69625	5.06867	4.35086	1.25777	1.13151	5.99084	1.75793	2.84674	5.4247	21.1477	6.31254	1.76479
XLOC_052413	OSIGBa0135C13.5 [Oryza sativa Indica Group]	0.586338	4.39171	8.77229	0.265062	10.2805	35.5127	0	0.770927	5.9995	3.2827	7.68542	6.14256	1.99976	0	0	15.0056	21.0794	16.4616	1.51253	0.176095	0
XLOC_046063	PREDICTED: protein ALWAYS EARLY 2-like [Brachypodium distachyon]	9.40489	7.98505	5.80952	9.20221	8.34723	8.70318	2.03028	2.0901	11.9663	14.8541	12.4353	12.2604	12.6794	5.68227	5.54476	0.930689	2.01927	0	2.15428	1.50539	2.23147
XLOC_076083	hypothetical protein M569_10260, partial [Genlisea aurea]	1.68692	1.88073	1.25488	2.25084	0.919437	2.47814	3.96351	2.27342	0	0.499148	0.348994	1.3234	0.505148	0	0.22099	0	0	0	1.32321	1.05169	0.304238
XLOC_034271	PREDICTED: protein OBERON 2 [Vitis vinifera]	0.671709	0.34614	1.04914	0.169678	0.659663	0.951798	0.157415	0.0894505	1.02109	3.78124	5.16125	3.75958	4.7925	1.24531	0.524791	0.829808	0	0	0.806078	0	0.247539
XLOC_059506	Transcription factor bHLH69, putative [Theobroma cacao]	10.9996	5.11004	2.5872	11.2987	11.1306	6.3992	2.25539	7.50423	7.12656	2.97419	2.70277	2.40877	1.8674	1.13934	0.959503	0.526058	1.02704	0.394389	3.88904	2.63067	2.78601
XLOC_058175	hypothetical protein ARALYDRAFT_892518 [Arabidopsis lyrata subsp. lyrata] >gi|297337665|gb|EFH68082.1| hypothetical protein ARALYDRAFT_892518 [Arabidopsis lyrata subsp. lyrata]	5.04427	9.45002	4.09956	6.16427	7.28866	10.838	44.8205	5.29285	0.319893	0.467681	0	0.301105	0	1.13559	2.25251	1.84045	0	2.10808	4.04541	7.1325	6.57574
XLOC_082544	PREDICTED: uncharacterized protein LOC100244234 [Vitis vinifera]	0	0	0	0	0.120798	0.100966	6.72788	3.85101	0	0	0	0	0	0	0	0	0	0	0	0	0
XLOC_001260	hypothetical protein M569_04254 [Genlisea aurea]	88.2754	93.4135	62.6757	57.4731	44.7745	63.5592	4.36176	1.47692	0.42337	6.50654	10.076	5.36168	0	0	0.713947	18.1938	13.6454	30.1752	13.612	0.39799	1.14446
XLOC_085279	PREDICTED: 33 kDa ribonucleoprotein, chloroplastic-like [Solanum lycopersicum]	13.4891	11.9491	13.043	12.3895	10.5486	15.4376	21.7394	7.8348	15.755	20.6664	15.4128	10.5682	14.5772	74.035	22.5157	7.93653	8.96946	2.99983	18.8877	25.2395	26.636
XLOC_042848	Histone acetyltransferase complex component isoform 1 [Theobroma cacao]	0	0	0	0	0	0	0	1.67154	13.7518	24.1753	29.9546	81.1574	16.022	18.9174	3.04403	96.5706	86.259	188.19	4.20757	18.994	29.3338
XLOC_028587	acyl-CoA binding protein, putative [Ricinus communis] >gi|223543972|gb|EEF45498.1| acyl-CoA binding protein, putative [Ricinus communis]	5.79757	6.47962	6.15411	5.36851	5.72057	4.16254	1.02094	2.00732	1.855	3.65198	2.26423	4.17621	2.42845	1.67469	0.638282	4.12412	3.60891	2.73059	1.10186	2.18366	1.40196
XLOC_045638	DnaJ protein family-like protein [Oryza sativa Japonica Group]	1.86009	1.93853	2.44116	1.53503	2.15606	3.06145	2.60443	2.79826	7.59492	4.41635	4.62291	4.72399	4.2446	2.12032	6.27346	1.36029	2.65617	1.84341	1.9605	6.11874	8.46228
XLOC_030316	RING/U-box superfamily protein [Theobroma cacao]	1.07514	0.393805	1.18355	1.09772	0.396336	0.551589	1.27012	0.41318	0.560009	2.91237	2.06597	2.87159	3.89776	0.212414	0.577039	0	0	0	1.36348	0.359817	0.877704
XLOC_037708	TPA: hypothetical protein ZEAMMB73_415271 [Zea mays]	4.17251	4.3324	13.2406	4.60086	4.88134	6.57621	13.95	28.5991	1.61994	6.21367	9.13981	11.5245	9.59216	5.42273	8.54325	4.86908	6.69499	7.02959	22.8221	4.47347	6.0222
XLOC_082870	Os04g0684200 [Oryza sativa Japonica Group] >gi|255675897|dbj|BAF16222.2| Os04g0684200, partial [Oryza sativa Japonica Group]	11.7715	10.996	14.6844	13.1108	12.3651	11.5105	15.6609	8.12526	5.40717	9.5083	11.0967	9.86505	10.6913	15.8806	18.4693	1.22959	0.609821	2.54639	5.80938	6.17122	9.79676
XLOC_060360	PREDICTED: microtubule-associated protein TORTIFOLIA1-like [Vitis vinifera]	6.7983	7.36075	7.09581	12.4587	7.85875	9.24894	6.39691	11.0323	8.07718	9.14667	14.9	10.0869	14.1236	2.95217	4.59936	3.72738	3.32677	0	12.0359	2.85902	5.12977
XLOC_071340	hypothetical protein PRUPE_ppa021566mg [Prunus persica]	0.355425	0.224454	0.25556	0.397681	0.330989	0.196368	0.0730593	0.124588	0	0.200076	0.135729	0.292043	0	0.142254	0.129517	0	0	0.328065	0.0391454	0	0.122483
XLOC_076151	predicted protein [Hordeum vulgare subsp. vulgare]	0.0641879	0.1743	0.465117	0.128167	0.147788	0.0409558	0.0769763	0.0447464	0	0.315965	0.560475	1.62984	1.58583	0	0	0.339295	1.00282	0.251202	0.186808	0.0529924	0.0552118
XLOC_071748	gibberellin-regulated protein [Arachis hypogaea]	127.846	51.4302	24.4853	111.542	74.0679	28.8894	0	4.27383	2.10462	1.15553	0.599938	0.445493	0	0	0	1.71006	3.39151	6.57212	3.24001	0.656605	0.673603
XLOC_020687	LLA-115 [Lilium longiflorum] >gi|189409350|gb|ACD93462.1| tapetum-specific protein LLA-115 [Lilium longiflorum]	2.28441	0.250501	0.285779	6.96293	12.5694	8.0024	0	0.0610707	4.90924	1.45008	0.408434	0.537747	0	0	0	2.48408	2.48408	1.91231	2352	0.0543392	0.126894
XLOC_093823	PREDICTED: condensin complex subunit 2-like [Setaria italica]	69.2152	100.108	111.47	132.731	86.9963	68.4685	0	2.26693	0	6.56396	18.2573	16.205	11.9435	2.93122	2.25937	0	0	0	8.83576	1.20024	1.46483
XLOC_075961	restorer-of-fertility [Raphanus sativus]	0.250462	0.353533	0.287344	0.128445	0	0.7498	0.417591	0.370859	0	2.27887	2.71353	2.27235	1.38717	0.827824	1.83714	0	0.376191	0	0	1.1163	0.538081
XLOC_030491	cinnamoyl-CoA reductase [Cunninghamia lanceolata]	0	0	0.379842	0.260218	0	0	0	0.542897	0	0.605865	0	2.61152	2.45066	7.61395	0.617714	0	3.97997	1.41416	0.831471	4.06194	1.16476
XLOC_004778	putative UDP-glucose dehydrogenase [Sorghum bicolor]	0.329706	0.322252	0.374086	0.482414	1.59813	0.89775	1.83274	5.55684	0	0	0	0	0	0	0	0	0	0	0	0	0
XLOC_020759	Receptor-like protein kinase THESEUS 1 [Theobroma cacao]	1.28422	0.395358	0.780944	1.26349	1.34521	0.766538	3.40855	4.00572	4.04114	5.5627	5.50719	5.72038	4.48551	9.26268	6.37498	1.86571	1.12236	3.69005	5.45925	2.80977	3.45739
XLOC_091325	uncharacterized protein LOC100278952 [Zea mays] >gi|195657529|gb|ACG48232.1| hypothetical protein [Zea mays] >gi|414585043|tpg|DAA35614.1| TPA: hypothetical protein ZEAMMB73_652181 [Zea mays] >gi|414585046|tpg|DAA35617.1| TPA: hypothetical protein ZEAMMB73_235499 [Zea mays]	1.33029	5.08792	2.76334	0.904128	2.49387	10.7019	2.58895	5.44434	18.7164	1.99353	3.55324	1.21846	0.389485	92.0342	43.2331	95.9069	74.1187	135.218	6.87363	8.93786	8.62839
XLOC_051109	WD repeat-containing protein-like protein [Medicago truncatula] >gi|355500944|gb|AES82147.1| WD repeat-containing protein-like protein [Medicago truncatula]	5.9569	5.49468	4.51027	7.87773	6.92185	7.06312	13.947	9.83969	3.83194	5.84096	6.83767	7.58198	7.29572	4.43635	3.53984	3.61258	5.16209	2.27829	5.50161	2.86552	3.15435
XLOC_076111	hypothetical protein VITISV_011746 [Vitis vinifera]	0.0771375	0.0486695	0.122646	0.1722	0.164136	0.0681369	0.31974	0.0626394	0	0.0537168	0	0	0	0	0	0	0	0	0	0	0.0152842
XLOC_074406	uncharacterized protein LOC100276585 [Zea mays] >gi|195627558|gb|ACG35609.1| hypothetical protein [Zea mays]	0.42871	0.522749	0.725877	0.18371	0.202793	0.189652	22.2929	23.2017	38.817	7.39055	7.36465	7.72873	4.07417	79.6183	35.1447	19.1546	9.909	15.6625	0	10.774	7.13761
XLOC_040975	Os05g0128400 [Oryza sativa Japonica Group] >gi|75254079|sp|Q688R1.1|MTP1_ORYSJ RecName: Full=Metal tolerance protein 1; Short=OsMTP1 >gi|51854365|gb|AAU10745.1| putative zinc transporter [Oryza sativa Japonica Group] >gi|113578090|dbj|BAF16453.1| Os05g0128400 [Oryza sativa Japonica Group] >gi|125550...	14.2779	11.3525	11.224	15.6241	12.493	15.6116	15.7506	12.3578	10.651	17.8336	19.3672	16.1448	14.9455	43.0898	66.5981	20.3543	27.115	21.3912	19.658	34.991	50.412
XLOC_025129	hypothetical protein VITISV_029265 [Vitis vinifera]	0.0830779	0	0.179988	0	0	0.110412	0.103495	0.115656	4.45196	0.141581	0.481583	0.368825	0.462618	0.0670652	0	0	0	0	0	0	0
XLOC_088722	unnamed protein product [Vitis vinifera]	16.7012	12.2621	7.96108	20.5462	13.7861	10.8283	3.05569	3.57236	18.2777	11.3973	13.2924	12.9435	8.18059	10.027	16.114	8.78687	10.7253	10.2692	8.34245	4.79384	7.11079
XLOC_085590	hypothetical protein PRUPE_ppa004264mg [Prunus persica]	1.98288	2.36677	0.836427	0.842333	1.48145	1.04511	0.682373	0.271997	2.03638	1.95679	1.5099	1.31234	2.08265	0	1.22594	2.52633	1.18921	4.36476	3.79181	4.39258	8.06444
XLOC_048789	PREDICTED: probable serine/threonine-protein kinase At4g35230-like, partial [Cucumis sativus]	30.7158	25.8966	27.0176	39.0819	30.2008	28.8359	22.5463	6.4507	4.85653	11.4263	13.4465	12.1128	17.6771	13.4446	16.9149	21.0128	17.9217	16.9612	38.6652	17.6412	24.4626
XLOC_087568	PLC-like phosphodiesterases superfamily protein isoform 2 [Theobroma cacao]	0	0	0	0	0	0	0	0	14.7178	8.84554	1.36434	3.76972	14.3237	8.77004	0.93947	0	0	0	0	0.811069	0.943211
XLOC_028438	hypothetical protein OsJ_15072 [Oryza sativa Japonica Group]	2.82579	2.15015	4.21326	2.64195	2.62146	2.7403	10.4886	1.90828	0.646712	0.413359	1.16539	0.393102	1.23149	2.00851	2.63944	3.63875	2.8674	3.20878	3.78672	0.191402	1.00769
XLOC_001650	neurobeachin, putative [Ricinus communis] >gi|223541620|gb|EEF43169.1| neurobeachin, putative [Ricinus communis]	47.5889	60.061	34.8804	92.2694	66.8394	82.9191	17.4923	8.4696	13.2607	12.9336	18.9132	8.45797	15.7631	4.96461	3.85784	7.61118	7.39116	7.37256	2.97636	2.27809	2.72386
XLOC_084448	predicted protein [Populus trichocarpa] >gi|222862307|gb|EEE99813.1| predicted protein [Populus trichocarpa]	49.3958	50.7125	47.4497	54.1511	46.6995	40.1312	1.10388	1.43715	14.0293	11.1881	9.45858	9.49775	9.35455	1.69583	3.74164	1.53169	0	0.588164	7.32498	3.01551	4.97847
XLOC_028287	hypothetical protein OsI_20166 [Oryza sativa Indica Group]	1.37779	0.128437	0.593021	1.10964	0.876527	0.728296	2.67207	4.35643	11.7839	3.72451	4.95532	5.75228	3.77776	0.677927	0.933196	5.40342	7.88324	6.19064	17.9657	14.906	14.6784
XLOC_026545	PREDICTED: receptor-like protein kinase HSL1-like [Vitis vinifera]	5.52886	5.4727	7.57402	5.30912	5.22763	6.04918	9.49544	3.92869	0	0	0	0	0	0	0	0	0	0	0	0	0.0371791
XLOC_064893	hypothetical protein OsI_26522 [Oryza sativa Indica Group] >gi|125600763|gb|EAZ40339.1| hypothetical protein OsJ_24786 [Oryza sativa Japonica Group]	2.14515	3.57608	3.43056	2.53674	4.06737	3.44778	1.7974	3.64642	1.74074	1.65242	0.57479	0.164181	0.424145	5.75129	1.52918	11.5207	20.4436	15.0115	9.68865	4.4111	6.1402
XLOC_073237	xylosidase [Arabidopsis thaliana]	0	0	0	0	0	0	6.681	0	0	0	0	0	0	0	0.737515	0	0	0	0.25297	0	0.171223
XLOC_067267	Serine/threonine-protein kinase PBS1 isoform 1 [Theobroma cacao]	1.69568	1.91646	1.76102	1.56682	1.60461	1.56777	3.0578	5.3043	0	0	0	0	0	0	0	0	0	0	0.4921	0	0.101634
XLOC_093104	hypothetical protein VITISV_013674 [Vitis vinifera]	4.45747	3.43086	3.00641	3.454	3.94831	3.00069	2.93864	0.974539	4.4066	7.96244	4.5507	5.8325	4.36188	11.3392	9.58378	0.789194	0	0	5.65233	4.02813	7.80303
XLOC_060045	PREDICTED: protein IQ-DOMAIN 1 [Vitis vinifera] >gi|297740471|emb|CBI30653.3| unnamed protein product [Vitis vinifera]	9.64116	13.9349	16.0563	9.39922	10.3221	14.3088	57.3393	15.8573	33.6126	37.9537	25.9089	43.7157	65.4937	34.2003	34.9449	19.1755	17.4174	15.2462	21.5489	8.61461	17.5208
XLOC_069793	ASR2 protein [Solanum chilense]	31.0866	126.71	380.108	20.9284	42.4389	350.653	719.528	375.343	564.632	2815.28	2270.64	2458.74	2632.47	532.828	1069.11	3229.76	2543.85	3612.93	5220.78	411.656	726.631
XLOC_053762	predicted protein [Hordeum vulgare subsp. vulgare]	0.832174	1.19313	1.37119	2.54077	0.184959	0.511357	24.1119	12.1194	8.38929	4.72323	6.60862	4.59583	9.32242	0.984097	4.44001	0	0.11422	0.0869931	1.54663	3.52266	2.64609
XLOC_030798	hypothetical protein CARUB_v10014722mg [Capsella rubella]	2.91174	3.43847	5.84988	3.334	4.14259	4.19555	9.29329	9.79406	0.379329	5.48371	5.09532	3.19705	2.99835	10.0244	10.3194	88.6919	83.2276	86.6157	24.0976	45.4467	51.6534
XLOC_045654	hypothetical protein F775_01080 [Aegilops tauschii]	25.1906	21.5484	21.8009	20.1898	23.0665	24.7759	17.889	14.3149	124.274	127.074	121.715	119.765	103.6	39.2834	28.6514	3.33768	5.50612	6.70598	18.2063	26.1611	30.7671
XLOC_066793	Uncharacterized protein TCM_037572 [Theobroma cacao]	0.947652	0.93029	1.77705	1.03628	1.21383	1.56429	1.56003	1.1609	0.837434	2.94356	0.866618	1.85081	1.11659	0.141305	6.42e-06	0	0.000388467	2.11911	0.985882	0.00524195	0.498106
XLOC_009483	PREDICTED: probable ATP-dependent RNA helicase DHX35 [Vitis vinifera]	22.1971	21.3394	19.1159	27.8649	23.942	22.5707	14.4947	7.6971	47.2144	67.2446	93.7427	88.9323	72.5613	63.6403	26.2496	0	0	5.69199	21.7685	29.5981	26.9073
XLOC_050519	unnamed protein product [Vitis vinifera]	0.741856	0.95749	0.55236	1.76226	0.995104	1.66962	10.5927	4.75814	9.36093	14.691	18.123	8.29391	16.1704	41.1266	29.2727	21.045	22.6639	29.4241	64.8795	16.148	18.3795
XLOC_001733	hypothetical protein OsI_36450 [Oryza sativa Indica Group]	4.19619	2.99557	6.48434	6.11857	4.14401	5.92543	7.96988	5.73347	0	0	0	0	0	1.43143	0	0	0	0	0.27409	0	0.192197
XLOC_071167	unknown [Glycine max]	5.59344	4.38713	6.8473	7.20722	4.45555	6.36823	0	0	4.84936	0	0	0	0	0	0	0	4.12048	0	0	0	0
XLOC_018171	pentatricopeptide repeat-containing protein, putative [Ricinus communis] >gi|223530169|gb|EEF32080.1| pentatricopeptide repeat-containing protein, putative [Ricinus communis]	3.98895	4.0165	1.89156	5.04885	4.04899	3.90361	4.57207	2.84653	3.75762	3.38789	1.69064	3.02406	1.54957	2.19564	1.91032	1.741	1.94579	3.41063	3.7809	2.07247	1.37049
XLOC_069185	PREDICTED: ras-related protein RABC1-like [Setaria italica]	14.0193	24.4459	19.4419	12.9223	10.1698	14.1229	14.848	6.47693	27.2824	59.2964	52.1265	95.7577	69.6123	62.9816	29.3786	19.1921	8.34722	6.23414	0.814618	24.6792	8.16192
XLOC_061948	PREDICTED: uncharacterized protein LOC101755121, partial [Setaria italica]	3.18966	2.61768	3.7351	3.82068	2.98214	3.4351	2.12899	3.76253	2.68907	4.4028	3.25286	4.21195	4.12603	5.46625	10.2153	10.4818	8.52455	23.314	12.4201	12.5375	4.15649
XLOC_034835	TPA: hypothetical protein ZEAMMB73_886510 [Zea mays]	3.9553	2.52846	2.48109	5.27644	5.00292	3.43213	4.0974	5.67837	2.31974	1.67533	1.19392	2.06552	2.37139	0.524068	2.29306	0	0	0	0.666186	0.671782	1.35992
XLOC_067970	PREDICTED: trafficking protein particle complex subunit 6B [Vitis vinifera] >gi|147767146|emb|CAN75647.1| hypothetical protein VITISV_031270 [Vitis vinifera] >gi|298204986|emb|CBI34293.3| unnamed protein product [Vitis vinifera]	13.6371	18.5696	19.7807	13.3687	20.4721	18.2886	31.8677	26.9754	3.13298	2.31398	3.92592	2.85369	2.5054	1.9867	1.05204	3.65903	2.1475	2.6311	1.25364	0.967969	0.734159
XLOC_074886	cyclopropane fatty acid synthase [Gossypium hirsutum]	3.37636	4.11643	9.3255	4.63372	4.17737	11.2085	1.80992	3.33812	4.0151	3.7648	3.38522	2.69231	1.73722	0.344317	1.17215	0	0	0.336339	0.939136	6.66744	11.8848
XLOC_036574	NADH dehydrogenase [ubiquinone] flavoprotein 1, mitochondrial [Triticum urartu]	28.3001	26.3955	26.1749	29.106	26.471	27.4666	28.7816	16.813	0.278586	0.233573	0.369711	0.405163	0.0457709	7.42578	8.92963	0	0	0	46.7351	2.78171	14.0587
XLOC_057338	protein disulfide isomerase, partial [Triticum aestivum]	3.48254	5.36445	6.86241	5.45176	5.6165	3.93553	0.792311	20.1637	10.222	10.9239	13.5198	16.8962	12.6136	9.10379	1.14313	31.6704	48.4371	15.4574	9.48635	23.1473	3.62505
XLOC_042629	PREDICTED: uncharacterized protein LOC100248904 [Vitis vinifera]	7.23157	7.44305	6.89015	11.6686	7.51771	4.7308	9.98852	6.19537	10.5284	9.88115	12.4293	11.1237	12.3241	12.0196	12.6058	4.0344	1.72496	3.56721	8.68227	17.4728	17.345
XLOC_016990	RNI-like superfamily protein [Theobroma cacao]	10.4996	10.2372	10.6658	8.87134	8.67874	8.3082	9.45451	3.1481	3.47152	0.587908	1.03442	1.14808	0.659863	1.07925	3.39972	1.1209	0.575696	2.22445	3.79457	3.23594	5.32956
XLOC_089792	PREDICTED: uncharacterized protein LOC100255542 [Vitis vinifera]	0.563212	1.4755	0.859527	1.11427	2.12785	0.256737	2.66045	9.13102	0.61708	1.68202	2.29707	1.73753	1.28581	0	0	0	2.32131	1.73777	0.754027	0.609343	0.177554
XLOC_084473	PREDICTED: uncharacterized protein LOC101766573 isoform X1 [Setaria italica]	3.56332	1.46322	3.78653	3.72913	1.7988	2.62234	1.44046	0.846685	1.65453	7.58906	4.3717	6.73772	5.12245	3.3229	1.90651	0	0	0.000613159	1.64445	2.06036	2.73159
XLOC_078717	PREDICTED: uncharacterized protein LOC100854102 [Vitis vinifera]	5.15132	7.92617	4.69284	5.86065	5.68328	5.22677	3.11632	4.16107	9.83793	18.9667	26.4529	20.4854	12.6361	1.76958	0.265356	47.1605	31.3579	42.5331	7.11085	4.49698	6.23959
XLOC_017853	PREDICTED: parafibromin-like [Cucumis sativus] >gi|449513423|ref|XP_004164322.1| PREDICTED: parafibromin-like [Cucumis sativus]	15.5326	14.0866	8.13732	11.9421	12.9322	12.6463	12.9457	5.86334	7.07695	8.85959	8.66857	9.31733	4.76961	7.25439	9.35601	9.67965	7.28372	4.33075	11.5826	3.90188	8.26222
XLOC_085302	hypothetical protein SORBIDRAFT_04g020480 [Sorghum bicolor] >gi|241931968|gb|EES05113.1| hypothetical protein SORBIDRAFT_04g020480 [Sorghum bicolor]	1.99725	2.26083	1.93404	2.81823	2.37706	2.76783	0.635771	1.35987	0	0.0483147	0	0.0472133	0.0430555	0.13731	0.183565	0	0	0	1.63043	0	0.0738108
XLOC_013212	hypothetical protein PRUPE_ppa007342mg [Prunus persica]	0.582521	0.180078	0	0.702598	2.94566	1.44432	0	0.891999	0	0.128914	0.882753	0	0.141264	0	24.6383	0	0	1.33344	3.46492	21.9298	14.6937
XLOC_021171	PREDICTED: ethylene-responsive transcription factor CRF1-like [Glycine max]	0.242551	0.35139	0.237769	0.192631	0.531543	0.583554	0.477749	1.25661	0.753254	0.353782	0.36582	0.316004	0.0373179	4.00378	1.93461	8.05052	8.71031	7.42498	0.928587	2.02211	1.57823
XLOC_014132	PREDICTED: macrophage erythroblast attacher [Vitis vinifera] >gi|297736449|emb|CBI25320.3| unnamed protein product [Vitis vinifera]	9.34686	9.07953	9.78802	9.46351	8.19464	13.2342	13.3503	14.1736	7.54678	12.5167	8.57435	7.97522	10.3679	10.1203	5.70733	5.38802	6.06557	3.32274	7.1513	4.18169	9.27794
XLOC_073157	pentatricopeptide (PPR) repeat-containing protein [Musa balbisiana]	1.51432	0.935052	0.762641	0.833191	0.548359	0.77608	0.0873493	0.304072	0.155682	0.0663619	0.168046	0.0297961	5.4e-05	0.0412436	0.174203	0	0.413246	0.33222	0.0358734	0.0306932	0.000629949
XLOC_024426	ATP-dependent DNA helicase Q5 [Aegilops tauschii]	2.21059	1.67609	0.817935	2.12891	1.53059	1.53235	3.33998	1.87791	1.54823	10.4921	7.89607	3.08983	5.08417	5.75671	3.42291	0	0.65222	0.473419	1.53235	3.58307	0.872914
XLOC_062840	hypothetical protein ZEAMMB73_232602 [Zea mays]	5.39441	4.76179	3.60982	6.67359	3.51331	4.51745	2.58407	2.91645	21.4845	11.0222	8.05599	10.5847	10.1676	5.81909	14.0196	7.30875	5.32404	9.05545	2.49238	11.6391	16.8041
XLOC_017972	unknown [Zea mays] >gi|413922750|gb|AFW62682.1| avr9 elicitor response protein [Zea mays]	5.87269	6.13347	4.51997	5.59019	3.13734	5.88254	12.8724	15.8147	6.22771	7.17413	5.87559	7.14986	4.94691	9.73939	2.89354	1.82728	3.45901	0	1.84398	2.75879	4.3892
XLOC_022154	PREDICTED: BEACH domain-containing protein lvsC-like [Setaria italica]	2.99036	3.33971	2.10972	1.3668	3.02082	2.80332	0.20879	0.65522	10.1881	4.58866	3.86948	5.37117	3.56182	0.278933	0.531449	0.279617	0	0	1.07954	0.398277	1.14988
XLOC_040285	PREDICTED: TATA-box-binding protein 2-like isoform X2 [Setaria italica]	0.679609	1.53131	1.51211	1.12256	1.82154	1.67907	1.2017	1.51202	0	0	0	0	0	0	0	0	0	0	0.150723	0	0
XLOC_033182	hypothetical protein M569_15761 [Genlisea aurea]	0.0439083	0	0	0	0	0	0.45699	0	0	0.12186	3.7e-05	0	0.363495	0.292642	0.00106839	0	1.03326	0	0.289744	5.6286	0.432931
XLOC_035583	LOB domain-containing protein, putative [Ricinus communis] >gi|223533209|gb|EEF34965.1| LOB domain-containing protein, putative [Ricinus communis]	0.360137	0.308596	0.35677	1.05211	0.39215	0.326355	0.366973	0.379478	1.80639	0.848066	1.17592	1.41338	1.0704	3.18831	0.798295	2.80143	6.69131	6.9823	2.40615	1.26796	0.902044
XLOC_007298	PREDICTED: uncharacterized protein LOC101765563 [Setaria italica]	0	0	0.276774	0.0868949	0	0	19.2691	12.7011	0	3.2115	2.34012	2.23949	1.41302	2.62645	2.98149	24.6028	17.5734	26.9428	5.54243	13.5708	29.284
XLOC_035920	hypothetical protein SORBIDRAFT_09g002040 [Sorghum bicolor] >gi|241944478|gb|EES17623.1| hypothetical protein SORBIDRAFT_09g002040 [Sorghum bicolor]	1.33573	0.881286	2.08286	2.08838	0.706997	0	46.9076	25.8084	2.67738	4.50908	5.10733	6.66296	0.569317	4.59618	2.36176	0	0	0	3.99115	0.847269	0.598097
XLOC_075642	kinase, putative [Ricinus communis] >gi|223542129|gb|EEF43673.1| kinase, putative [Ricinus communis]	6.7026	5.89252	5.32607	7.8151	7.46413	5.82807	1.18576	2.1231	1.09082	6.17838	6.38918	5.91939	3.94563	0.528151	0.458869	0	0	0.443415	1.38192	2.81033	3.03202
XLOC_046357	PREDICTED: ABC transporter B family member 25, mitochondrial-like [Vitis vinifera] >gi|297745734|emb|CBI15790.3| unnamed protein product [Vitis vinifera]	2.7849	5.27946	1.8659	2.483	1.30415	2.20551	1.70353	2.0686	0.593243	1.12087	1.21311	1.52658	0	8.16592	4.58048	0	0	0	0.64012	0	0
XLOC_004278	actin depolymerizing factor 4-1 [Secale cereale x Triticum durum]	0	0	0	0	0	0	0	0.183943	0	0.171913	0	0.174043	0.61308	0.242848	0	0	0	0	7.46303	0.631627	1.40778
XLOC_093010	PREDICTED: 2-oxoglutarate dehydrogenase, mitochondrial-like [Fragaria vesca subsp. vesca]	10.4911	10.2937	4.63103	7.87919	5.53682	3.62101	10.3347	6.47835	9.20234	14.16	12.1441	14.7076	7.79557	10.0096	12.8039	0	0	1.02596	9.74932	16.3554	17.668
XLOC_002267	HOPM interactor 7 isoform 3, partial [Theobroma cacao]	19.9561	12.2863	8.4218	11.1015	12.5299	13.2819	1.37806	1.47595	53.179	50.1838	30.5722	50.0413	36.3532	3.75928	3.34312	39.124	12.9142	3.66054	7.75923	6.00382	2.77189
XLOC_056500	PREDICTED: SET domain-containing protein 4-like [Brachypodium distachyon]	23.5332	22.3959	20.4554	26.0959	20.9499	19.9479	3.95282	5.95316	6.33644	8.83183	7.37242	11.0845	8.50459	3.38218	3.08946	0.993407	1.39412	0.614701	4.58456	2.9642	4.75627
XLOC_060804	putative receptor-like protein kinase ARK1 [Oryza sativa Japonica Group] >gi|222619373|gb|EEE55505.1| hypothetical protein OsJ_03704 [Oryza sativa Japonica Group]	0.431279	0.457852	0.275709	0.552498	0.308563	0.509577	1.74904	1.94797	1.39408	0.546512	0.235334	0.637346	0.668762	3.37011	2.9985	2.28111	1.6822	1.06576	0.154205	0.83088	1.10326
XLOC_026077	unnamed protein product [Vitis vinifera]	0.0833917	0.15995	0.183486	0	0	0	0.646184	0.226524	5.09561	5.67729	5.34901	5.14128	3.57702	4.85687	1.04057	0	1.1341	0.865749	2.21395	0.89311	0.726513
XLOC_027625	predicted protein [Populus trichocarpa] >gi|222848501|gb|EEE86048.1| predicted protein [Populus trichocarpa]	8.73953	7.22931	2.43591	8.69198	5.46008	5.24975	0	0.202282	1.97323	1.29447	0.710137	0.340964	0.153828	0	0.155343	0	0	0	2.06305	0.978249	1.55356
XLOC_008267	PREDICTED: LOW QUALITY PROTEIN: DEAD-box ATP-dependent RNA helicase 53-like [Setaria italica]	93.0556	101.305	70.4022	95.0654	97.9647	92.5209	45.2429	48.1317	87.9257	129.342	120.945	132.85	117.615	98.0413	34.2462	10.4392	7.64577	10.2156	28.7898	58.7058	57.6281
XLOC_027011	PREDICTED: E3 ubiquitin-protein ligase HERC2 [Vitis vinifera] >gi|296082630|emb|CBI21635.3| unnamed protein product [Vitis vinifera]	16.5948	18.7402	0	11.1959	9.87286	17.5676	27.5148	6.09999	0	17.5917	54.2774	24.7048	25.9493	54.4574	27.5894	54.0375	27.0188	16.8814	40.2122	17.7311	13.22
XLOC_020583	PREDICTED: uncharacterized GPI-anchored protein At3g06035-like [Brachypodium distachyon]	12.8881	17.2411	15.0714	14.1273	13.3284	24.6563	18.497	44.1281	42.8135	42.5717	41.1613	47.1064	45.4232	30.8983	62.8488	2.44295	0	1.84908	24.1886	20.7289	27.9115
XLOC_017299	PREDICTED: agamous-like MADS-box protein AGL14-like, partial [Cucumis sativus]	84.9055	211.569	395.66	109.709	75.3856	124.285	0	31.5635	142.798	519.559	598.297	772.941	485.799	148.611	246.073	0	0	0	277.253	10.1583	11.8238
XLOC_071706	hypothetical protein MTR_102s0003 [Medicago truncatula] >gi|355503708|gb|AES84911.1| hypothetical protein MTR_102s0003 [Medicago truncatula]	13.0962	11.4283	8.59781	13.4276	12.1181	11.0482	2.44518	29.0216	0	0	0	0	0	0.237887	0	10.664	0	15.4389	10.3952	8.11296	9.70539
XLOC_002958	hypothetical protein PRUPE_ppa008268mg [Prunus persica]	8.14543	10.9755	9.73313	9.74712	8.4202	12.6688	12.137	8.16427	28.3257	28.6002	29.2951	31.2608	25.0905	51.1663	44.2905	10.1302	4.80249	4.96509	12.6845	11.9024	17.039
XLOC_053919	predicted protein [Populus trichocarpa] >gi|222849418|gb|EEE86965.1| predicted protein [Populus trichocarpa]	0.337207	0.836527	0.532604	0	0	0.718268	0.227595	0.491506	4.09183	3.99524	0.213124	3.61751	1.05084	0.472531	0.297626	0.000283267	0.000163036	1.65283	0.531895	0.313361	0.599472
XLOC_010108	TPA: putative protein kinase superfamily protein [Zea mays]	5.48368	4.46323	3.71883	4.61242	4.86225	5.15946	3.39821	1.19305	3.14676	1.59751	0.532357	1.03154	1.00864	0.740371	1.57347	2.15562	6.20661	1.67179	0.361647	0.608539	0.790283
XLOC_042864	Os05g0541900 [Oryza sativa Japonica Group] >gi|255676535|dbj|BAF18104.2| Os05g0541900 [Oryza sativa Japonica Group]	4.11994	4.4728	2.76521	3.62181	5.6056	4.20497	12.3275	26.9077	5.55873	5.70486	5.23683	6.61051	3.67241	8.6835	6.48285	95.6571	138.037	29.5417	14.1551	7.9462	2.51332
XLOC_072323	Uncharacterized protein TCM_015294 [Theobroma cacao]	0	0	0.116169	0	0	0	2.352	0.31822	0	0.376881	1.19489	0.104357	0.196462	14.4705	18.2685	20.0814	19.6003	17.7044	4.69079	1.77732	3.68211
XLOC_000062	conserved hypothetical protein [Ricinus communis] >gi|223534729|gb|EEF36421.1| conserved hypothetical protein [Ricinus communis]	0	0	0	0	0	0	0	121.509	244.981	71.517	283.72	246.824	160.639	0	0	0	0	0	0	49.9355	0
XLOC_012629	predicted protein [Hordeum vulgare subsp. vulgare]	1.4413	1.27053	3.52194	1.50111	2.53255	1.77191	0.706302	0.865715	0	0	0	0	0.142488	0	0	1.7039	0	0	0.523829	0.149092	0.133437
XLOC_045557	PREDICTED: peregrin-like [Cucumis sativus] >gi|449525830|ref|XP_004169919.1| PREDICTED: peregrin-like [Cucumis sativus]	3.18755	5.52774	2.10448	4.44432	6.68897	5.93293	0.62499	2.78989	0.761229	0.975194	2.37896	2.07117	1.49403	0.10884	0.0986882	6.79838	10.2993	6.48829	2.24936	2.33957	4.12235
XLOC_060050	hypothetical protein VITISV_002539 [Vitis vinifera]	0	0	0	0	0	0	0	0	0	0.0819074	0	0.0808035	0.146	0.116205	0	0.970728	0	0	0.280431	0.424694	0.625893
XLOC_011698	TBCC domain-containing protein 1 [Triticum urartu]	10.017	8.15698	11.1927	8.93713	8.69679	9.58624	15.4047	7.82046	0.323152	0	0	0	0	0	0	0	0	0	0	0.306142	0
XLOC_021832	PREDICTED: U6 snRNA-associated Sm-like protein LSm6-like isoform 1 [Solanum lycopersicum] >gi|460407397|ref|XP_004249139.1| PREDICTED: U6 snRNA-associated Sm-like protein LSm6-like isoform 2 [Solanum lycopersicum]	15.1696	15.8038	15.3021	14.8131	24.9611	15.161	15.7549	16.551	0.345887	1.22095	0	0.239805	1.61394	1.08504	1.60398	5.00793	6.65485	0	0.510868	1.03268	0.733664
XLOC_093057	PREDICTED: two-component response regulator ARR9-like [Fragaria vesca subsp. vesca]	0.414939	0.637725	1.77605	1.04843	0.934713	1.33799	2.85517	3.67885	18.3731	19.3209	30.6231	23.4346	44.0407	28.7667	38.1879	15.1164	23.5138	18.4995	13.481	11.2676	10.8328
XLOC_085695	PREDICTED: uncharacterized protein LOC100253016 [Vitis vinifera] >gi|296083929|emb|CBI24317.3| unnamed protein product [Vitis vinifera]	0.406513	1.86355	3.40353	0.579843	1.30793	2.40144	3.42416	0.718171	0	0.330972	0	0	0.140545	0	0.272448	0	1.43102	0	0.170818	0.365281	0.704754
XLOC_076816	predicted protein [Populus trichocarpa] >gi|222838434|gb|EEE76799.1| predicted protein [Populus trichocarpa]	2.98861	3.18596	3.94231	3.33708	3.85912	3.22227	1.20368	4.15741	5.0301	8.41727	12.1268	9.33839	8.94361	2.62789	5.4452	2.41895	3.19417	3.04833	10.2217	2.31716	2.10116
XLOC_051085	alpha/beta hydrolase domain containing protein 1,3, putative [Ricinus communis] >gi|223533852|gb|EEF35583.1| alpha/beta hydrolase domain containing protein 1,3, putative [Ricinus communis]	14.4113	19.1513	16.002	22.2693	24.2276	14.0984	13.2737	8.16957	11.6195	31.403	35.597	30.3201	38.5198	21.3765	6.28825	0	0	0	7.61929	31.5288	7.03561
XLOC_087875	peptidyl-prolyl cis-trans isomerase [Linum usitatissimum]	0.421797	2.56786	4.13732	1.40018	1.38712	3.56374	0	0.94382	0	4.02807	0	9.74376	0	0.851986	4.78957	0	0	3.21933	10.1176	0	2.6788
XLOC_052571	Uncharacterized protein isoform 8 [Theobroma cacao]	8.80987	7.10499	9.6467	13.688	6.62646	9.59452	4.39829	2.20565	3.72057	3.11643	4.42639	1.90648	3.86947	4.47935	6.89763	1.78942	0	0	4.63622	12.0302	4.50463
XLOC_009535	succinate dehydrogenase flavoprotein subunit, partial [Ilex paraguariensis]	8.66841	12.2016	19.0525	12.2942	11.2197	15.0917	51.5699	104.623	0.143341	0.425587	1.45464	0.418547	0.695365	0.906166	0	3.41634	3.41634	1.96495	0.244388	0.373662	0.0345783
XLOC_090678	PREDICTED: proteasome subunit beta type-4 isoform 1 [Vitis vinifera] >gi|297746225|emb|CBI16281.3| unnamed protein product [Vitis vinifera]	58.6623	59.3031	46.0958	40.0036	61.5299	54.0382	63.6228	62.7126	14.9994	33.035	38.3688	40.7239	39.2752	33.5903	48.7666	24.7712	25.0688	32.167	35.8056	30.588	69.1342
XLOC_037899	hypothetical protein PRUPE_ppa004452mg [Prunus persica]	3.13899	2.993	1.30865	2.6507	3.22301	1.91814	0.401537	0.94806	0.532814	6.46966	3.74474	4.795	2.3997	4.35724	0.981269	1.32856	1.53745	0	0.975411	0.881497	1.39163
XLOC_025868	Protein SEY1, putative [Ricinus communis] >gi|223545053|gb|EEF46566.1| Protein SEY1, putative [Ricinus communis]	8.53285	9.04789	11.1376	7.49049	5.85034	9.31766	0.183883	1.29086	1.05453	1.24489	0.624697	0.0840439	0.381225	0	2.0777	0.869119	0	0	1.14643	0.331559	0.155065
XLOC_012406	hypothetical protein PRUPE_ppa016947mg, partial [Prunus persica]	0.0482165	0	0	0.0654932	0	0	0	0	0	0.605682	0.112555	0.215636	0.932318	0	0.103582	0.678692	2.03608	1.56594	1.40407	0.950169	1.21754
XLOC_021772	Auxin response factor 19 [Theobroma cacao]	2.14303	1.14262	1.76748	1.51514	2.22637	1.5514	2.7102	1.20691	3.96007	2.45684	1.32008	1.43908	2.48673	2.598	6.07877	0	0	0	0.802879	5.89373	7.19766
XLOC_043551	hypothetical protein VITISV_022809 [Vitis vinifera]	18.1039	17.1337	10.8103	13.0262	16.411	15.9001	4.25543	1.76491	2.73364	1.19304	1.13417	3.22547	2.77171	1.21858	1.90096	1.09521	1.0388	0	1.63536	2.64701	2.08357
XLOC_082224	PREDICTED: uncharacterized protein LOC101204960 [Cucumis sativus] >gi|449508124|ref|XP_004163226.1| PREDICTED: uncharacterized LOC101204960 [Cucumis sativus]	5.61071	6.61747	7.11043	4.80246	6.74408	6.53663	7.35199	5.17579	4.20567	8.86328	9.24207	8.1249	13.9736	5.67734	8.19782	4.73817	4.02704	3.66818	16.4368	2.07779	4.02673
XLOC_074916	predicted protein [Populus trichocarpa] >gi|222840643|gb|EEE78190.1| predicted protein [Populus trichocarpa]	2.62379	5.25177	4.3794	2.24588	2.39989	3.83614	0.906159	1.27358	36.1439	8.51594	13.5823	11.224	15.6362	0.276759	4.06593	6.62876	0	5.09414	4.54028	2.6037	2.34348
XLOC_062587	hypothetical protein PRUPE_ppa006244mg [Prunus persica] >gi|462409158|gb|EMJ14492.1| hypothetical protein PRUPE_ppa006244mg [Prunus persica]	22.4217	33.5914	27.4622	22.766	24.5877	23.6474	53.9741	16.8625	22.1479	27.4652	30.8996	34.4753	21.0899	15.9284	11.6935	0	0	0.851595	14.1119	3.62094	10.5024
XLOC_056754	Os02g0529600 [Oryza sativa Japonica Group] >gi|49388322|dbj|BAD25434.1| putative galactomannan galactosyltransferase [Oryza sativa Japonica Group] >gi|113536545|dbj|BAF08928.1| Os02g0529600 [Oryza sativa Japonica Group] >gi|215704838|dbj|BAG94866.1| unnamed protein product [Oryza sativa Japonica Gro...	0.463789	0.581603	0.385104	0.23581	0.583311	0.314538	2.92596	3.26781	3.84228	0.843176	1.07838	1.80345	1.20999	0.293887	1.45534	1.2482	1.13413	2.0592	1.05551	2.88569	0
XLOC_078138	predicted protein [Hordeum vulgare subsp. vulgare]	3.05042	2.55166	3.03556	2.31662	3.29381	3.68195	23.3609	18.0535	10.0011	5.3158	4.75008	5.03727	3.53202	11.9769	10.266	38.3342	47.5571	29.1917	6.37226	5.82667	7.52098
XLOC_028016	predicted protein [Populus trichocarpa] >gi|222840763|gb|EEE78310.1| predicted protein [Populus trichocarpa]	3.6789	3.18828	3.96756	8.6279	5.72529	3.76495	0.897153	1.24338	5.74383	7.35354	5.93605	6.44303	7.34267	3.94927	3.35351	1.35113	1.28972	3.9578	1.59839	1.93221	3.29734
XLOC_078716	unnamed protein product [Vitis vinifera]	10.2711	8.04747	8.20888	10.5644	9.36481	8.66954	3.98197	4.07314	12.1141	19.9348	15.1857	16.8124	12.699	9.32409	4.01547	5.70455	5.30087	3.06418	4.5206	8.93481	14.5613
XLOC_008160	lysine ketoglutarate reductase trans-splicing related 1 [Oryza sativa Indica Group]	0.56185	0.81902	0	0.404744	0.67931	0.570914	7.25524	8.30793	4.4077	2.41753	3.25479	2.97261	3.54097	3.41493	0.833224	12.6766	14.4876	17.773	2.06064	0.475374	1.05927
XLOC_030333	PREDICTED: phosphatidylinositol-4-phosphate 5-kinase 1 [Vitis vinifera]	5.27651	5.04446	5.40096	6.93608	4.65034	4.08108	1.00891	2.115	1.6449	2.6663	2.3385	3.18191	3.28181	0.904259	1.58091	0.288359	0.297391	1.61977	1.02307	1.44011	1.26685
XLOC_064646	unnamed protein product [Vitis vinifera]	269.397	500.226	545.752	675.822	504.348	430.745	3.67246	5.21048	0.458572	3.57613	55.0129	42.9886	235.888	32.936	29.4972	5.26016	74.6565	714.089	23.1029	1.2498	1.77481
XLOC_016093	Myosin 1 isoform 1 [Theobroma cacao]	28.3668	31.8619	33.2781	26.589	23.7346	34.1969	10.8434	3.82412	0	0.47417	0.239596	0	0.398179	1.03736	0	0	0	0	0.12297	0	0.169913
XLOC_010665	flavanone 3-hydroxylase [x Ascocenda sp. NK-2012]	0.475235	1.89511	1.26892	0.313857	0.491905	3.09904	1.92737	0.585789	1.64311	0.849135	0.927893	0.830742	0.608696	0	0.0845798	0.000564027	2.19145	0	9.18012	0.0789624	0.146193
XLOC_054162	clathrin adapter complex medium subunit-like protein, partial [Picea sitchensis] >gi|306012993|gb|ADM75550.1| clathrin adapter complex medium subunit-like protein, partial [Picea sitchensis] >gi|306012995|gb|ADM75551.1| clathrin adapter complex medium subunit-like protein, partial [Picea sitchensis]...	16.4491	14.642	26.0606	17.9396	19.5526	15.5126	69.0373	37.1985	43.9869	83.7298	83.8889	87.5258	91.5508	67.4068	115.769	58.9176	31.3875	47.7781	195.181	80.6606	87.1996
XLOC_089856	hypothetical protein SORBIDRAFT_02g036430 [Sorghum bicolor] >gi|241924238|gb|EER97382.1| hypothetical protein SORBIDRAFT_02g036430 [Sorghum bicolor]	0.716645	0	0.322561	1.65505	1.38671	0.388598	0.78134	0.56425	0	1.05976	0.555317	0.895304	0.314951	2.49447	1.97899	0	1.84311	0	0.1912	0.161272	0.143566
XLOC_060173	hypothetical protein PRUPE_ppa007716mg [Prunus persica]	1.32514	2.29919	6.53581	1.72221	1.65903	4.10061	6.71161	7.11806	0.785183	0.538478	0.639098	0.886399	0.361575	10.3848	2.28636	7.21051	14.4616	19.5811	1.60616	3.61556	3.73154
XLOC_004561	PREDICTED: diacylglycerol kinase-like [Glycine max]	2.55288	2.42534	2.43292	1.27226	1.9143	1.7077	0	1.8794	0	0	0	0	0	0	0	0	0	0	0	0	0
XLOC_037325	hypothetical protein VITISV_021814 [Vitis vinifera]	3.43506	3.4669	3.69886	3.63027	3.26657	3.42889	5.63006	2.36221	0	0.422561	0.25223	0	0	0.124158	0	0	3.0589	0	1.02422	0	0
XLOC_089995	PREDICTED: uncharacterized protein LOC101268739 [Solanum lycopersicum]	8.76218	8.02135	7.46965	10.6842	8.82078	7.58919	6.03861	7.87147	9.02604	8.50145	8.71731	10.9748	9.25054	11.7062	7.47714	27.7216	23.3309	31.0084	15.6648	7.84692	9.47789
XLOC_040559	hypothetical protein SORBIDRAFT_07g028810 [Sorghum bicolor] >gi|241941178|gb|EES14323.1| hypothetical protein SORBIDRAFT_07g028810 [Sorghum bicolor]	7.64058	3.12993	3.47805	2.14181	4.49306	4.45146	3.549	1.03493	9.0013	2.76242	1.9105	1.53713	1.28369	0	6.0356	0	0	0.210049	2.80195	0.529456	3.4261
XLOC_040237	Uncharacterized protein isoform 1 [Theobroma cacao]	37.1136	46.6099	35.4249	28.5772	35.6933	40.2318	4.48297	3.98901	3.28005	6.78387	6.19785	5.06411	4.23276	8.32899	0.785098	0	0	0	1.01418	1.12235	3.77816
XLOC_014866	PREDICTED: uncharacterized protein LOC100817229 [Glycine max]	0	0	0.0682227	0	0	0	1.63385	0.0289277	0.0951945	0.216279	0	0.136006	0.428872	0	0.18974	0	0	0	0.0681311	0.201896	0.302835
XLOC_013511	TPA: putative RING zinc finger domain superfamily protein [Zea mays]	10.2547	9.2394	7.19423	10.8691	10.9314	9.16671	0.393786	0.568459	2.80848	6.90346	4.93631	5.01441	4.71753	2.60206	4.05332	0	0.761061	0	2.94734	2.19364	3.2643
XLOC_008915	putative plastid ACP synthase [Elaeis guineensis]	32.8485	31.5791	29.4225	21.5843	27.9925	31.4155	42.1289	92.6503	74.6878	54.9654	51.8108	44.3714	61.4212	109.771	129.247	384.436	141.251	315.925	18.1992	56.2112	36.4038
XLOC_003209	PREDICTED: zeaxanthin epoxidase, chloroplastic-like [Glycine max]	0.393545	0.152114	0.424767	0.266848	0.508844	0.367707	8.89421	1.48247	0	0.360497	0.467854	0.59225	0.124193	3.07646	3.80425	2.88025	4.20608	2.67553	0.395402	0.345192	1.66136
XLOC_084596	cysteine proteinase [Elaeis guineensis]	31.7505	27.6655	71.6226	36.8912	31.2057	43.581	547.188	238.593	94.4831	140.615	138.065	162.543	188.039	291.262	306.71	714.173	1003.77	855.299	1009.61	496.317	601.328
XLOC_038137	hypothetical protein PRUPE_ppa000389m2g, partial [Prunus persica]	88.9685	892.346	352.032	450.893	690.852	438.304	1420.77	21.3882	144.703	854.679	728.56	1100.31	289.76	184.945	162.03	48.8126	97.6253	2225.82	454.917	367.315	240.203
XLOC_074751	Os01g0168300 [Oryza sativa Japonica Group] >gi|13486677|dbj|BAB39914.1| P0028E10.18 [Oryza sativa Japonica Group] >gi|20804821|dbj|BAB92504.1| unknown protein [Oryza sativa Japonica Group] >gi|113531659|dbj|BAF04042.1| Os01g0168300 [Oryza sativa Japonica Group] >gi|215686567|dbj|BAG88820.1| unnamed ...	9.73507	11.8883	13.1813	13.8208	12.101	13.7192	24.4231	17.1008	15.3635	16.8139	23.1264	20.3495	20.1048	22.9971	18.3989	0.517741	0	4.2447	7.65482	7.29298	12.1443
XLOC_017457	PREDICTED: probable E3 ubiquitin-protein ligase XBOS32-like [Brachypodium distachyon]	0	0	0	0	0	0	0	0.217427	0	2.74814	0.892674	2.8146	1.13103	0.298011	0.324541	0	0	0	0.673733	0.369838	0.977545
XLOC_074588	CBS domain-containing protein, putative, expressed [Oryza sativa Japonica Group]	11.7802	8.41512	9.0501	11.0275	8.03727	6.17044	3.42922	2.68321	4.65916	7.03775	12.4508	7.66405	9.04116	4.51457	4.90275	2.24114	6.92595	1.72119	2.44222	10.4586	5.93039
XLOC_031656	Os06g0726800 [Oryza sativa Japonica Group] >gi|122167800|sp|Q0D9C7.1|CCB22_ORYSJ RecName: Full=Cyclin-B2-2; AltName: Full=CycB2-Os2; AltName: Full=G2/mitotic-specific cyclin-B2-2; Short=CycB2;2 >gi|147743079|sp|A2YH60.2|CCB22_ORYSI RecName: Full=Cyclin-B2-2; AltName: Full=CycOs2; AltName: Full=G2/mi...	90.3416	83.5693	58.0162	104.807	89.6341	72.6701	1.88522	27.2221	17.9992	13.8395	14.0832	10.8918	6.05469	0.0621976	0.0867427	4.32122	6.8942	6.81639	6.6756	7.05278	9.23695
XLOC_004254	hypothetical protein VITISV_029373 [Vitis vinifera]	6.01512	0	0	38.4811	11.0954	56.6695	0	0	16.6876	33.0318	150.679	99.3359	37.7942	16.3228	21.5005	0	0	0	60.0549	12.4921	11.3244
XLOC_018017	PREDICTED: uncharacterized protein LOC100255255 [Vitis vinifera]	2.06411	1.91573	4.03975	2.11031	1.8716	2.04225	8.32071	5.36935	5.70725	10.2467	8.77468	8.74795	9.78168	8.44048	10.9165	30.8842	24.5761	38.1902	12.1151	7.77994	9.34334
XLOC_003332	PREDICTED: sister chromatid cohesion 1 protein 2-like [Brachypodium distachyon]	10.6332	8.41787	7.88461	9.38972	5.56394	4.46454	0.169035	0.943564	3.96186	6.48959	6.20346	2.97606	5.27198	0.217461	0	1.19121	0.774493	0	2.86883	0.615881	0.417971
XLOC_078172	PREDICTED: 6-phosphofructo-2-kinase/fructose-2,6-biphosphatase 3 [Vitis vinifera] >gi|297745867|emb|CBI15923.3| unnamed protein product [Vitis vinifera]	17.9969	15.4345	11.8431	14.4067	13.8001	13.9041	19.6123	13.8082	36.1998	33.2839	44.3599	48.0646	30.3356	175.523	115.059	27.4804	13.5212	17.3476	76.0403	45.2509	57.7353
XLOC_008113	hypothetical protein VITISV_027853 [Vitis vinifera]	55.5548	66.0499	55.6103	55.4177	68.0264	49.4355	100.853	117.889	1.04722	1.26996	0.721419	1.06958	0.930526	1.57583	0.429162	9.48777	18.3685	7.67093	0.871693	0.606944	0.783979
XLOC_018670	AP2-2 [Erycina pusilla]	49.5742	52.5571	45.0844	54.5623	51.6177	40.0388	41.5959	17.6345	12.348	18.5788	20.2762	19.116	26.4317	11.2728	15.4851	234.374	276.324	272.172	70.2784	42.3118	30.5031
XLOC_085953	f-box family protein [Populus trichocarpa] >gi|222835491|gb|EEE73926.1| f-box family protein [Populus trichocarpa]	0.186946	0.194551	0	0.0902246	0.166546	0.229911	0.249851	0.147452	0.15443	0.337634	0.618639	0.424758	1.55298	0.630108	0	1.09548	0	0.771832	0.914166	1.41068	1.14211
XLOC_082670	Os05g0220100 [Oryza sativa Japonica Group] >gi|46981236|gb|AAT07554.1| unknown protein [Oryza sativa Japonica Group] >gi|46981304|gb|AAT07622.1| unknown protein [Oryza sativa Japonica Group] >gi|113578496|dbj|BAF16859.1| Os05g0220100 [Oryza sativa Japonica Group] >gi|125551295|gb|EAY97004.1| hypothe...	45.2834	41.21	40.1102	51.2469	42.529	39.0273	60.6746	37.0218	39.4827	50.1809	58.8934	58.9932	51.2488	73.4995	50.154	35.4497	25.1818	30.809	19.8013	24.6034	35.5656
XLOC_016671	unnamed protein product [Vitis vinifera]	43.1246	27.4044	25.0672	35.2357	28.8632	20.2164	3.50372	3.5261	3.3449	5.33129	4.92211	3.862	2.5112	0.258038	1.11565	0	2.30536	2.23209	1.81683	0.200637	0.941833
XLOC_037103	PREDICTED: BI1-like protein-like [Cucumis sativus] >gi|449471847|ref|XP_004153426.1| PREDICTED: BI1-like protein-like [Cucumis sativus] >gi|449523593|ref|XP_004168808.1| PREDICTED: BI1-like protein-like [Cucumis sativus]	0	0	0	0	0	0	2.39728	0	4.37491	12.9043	10.7652	23.5674	10.7435	2.61056	0	0	0	0	0.85857	0	0
XLOC_053601	PREDICTED: cation/calcium exchanger 4-like [Setaria italica]	0	0.0671891	0.0765615	0	0	0	0	0.24744	0	0	0	0	0	0	0	0	0	0	0	0	0
XLOC_007644	hypothetical protein OsJ_33766 [Oryza sativa Japonica Group]	22.5067	40.6645	57.9781	30.1944	28.8238	59.5383	4.79695	2.78651	0	0.49538	0.301417	1.063	0.171928	2.96711	0	1.01287	3.01801	0	0.214386	0	0
XLOC_090681	unknown [Zea mays] >gi|413920637|gb|AFW60569.1| hemolysin A [Zea mays]	10.5619	11.5566	14.4923	15.5767	13.0272	13.6676	29.6608	18.3457	8.18002	7.90418	8.90664	5.46178	7.39184	10.6494	2.14146	9.78478	0	0	5.28339	3.86199	3.8068
XLOC_069137	hypothetical protein OsJ_11578 [Oryza sativa Japonica Group]	6.04523	9.61571	9.41788	6.93326	8.16997	7.3038	6.89679	7.56453	17.053	13.3957	18.9185	19.5878	27.2784	15.7552	10.8584	44.03	51.0348	68.9011	44.4358	3.23971	5.55828
XLOC_035763	PREDICTED: polypyrimidine tract-binding protein homolog 3 isoform 1 [Vitis vinifera]	0.687226	1.18999	4.14154	1.73796	2.12072	1.92367	0.559181	2.69698	0.537844	6.86281	16.0737	9.12471	15.683	0.119155	0	0	0	0	0	1.26991	1.2735
XLOC_075575	TPA: hypothetical protein ZEAMMB73_059254 [Zea mays]	4.88638	6.03619	0.413227	5.34883	0.878544	1.48304	2.04026	2.79024	0	0	0	0	0	0	0	0	0	0	0	0	0
XLOC_053867	hypothetical protein [Zea mays] >gi|413939309|gb|AFW73860.1| putative HLH DNA-binding domain superfamily protein [Zea mays]	0.233568	0	0	0.305896	0.126365	0.104799	0.692496	0.202617	0.228622	1.74978	1.85118	1.34537	1.22524	0.11536	0	0	0	0	0.558379	0.502568	0.545668
XLOC_059245	PREDICTED: uncharacterized protein LOC100245310 [Vitis vinifera] >gi|297743856|emb|CBI36826.3| unnamed protein product [Vitis vinifera]	0.220639	0	0	1.00105	0.358269	0	0.641212	0.554218	0	0	0	0	0	0	0	0	0	0	0	0	0
XLOC_011592	BTB/POZ/MATH-domains containing protein isoform 1 [Theobroma cacao]	23.951	23.9895	26.1189	28.1186	22.9386	19.4376	14.1978	11.8351	19.2892	22.5094	21.8666	24.4921	22.7892	24.1417	19.0473	74.3752	71.8345	85.0766	17.6753	15.5303	23.4818
XLOC_052278	PREDICTED: U-box domain-containing protein 21-like [Setaria italica]	0	3.08e-05	0	8.73e-07	0.0814213	3.78e-05	1.01731	1.10657	0	0	0	0.0597668	0	0	0	8.07527	11.2454	23.8733	0.963311	1.96e-05	0
XLOC_079462	Os01g0769700 [Oryza sativa Japonica Group] >gi|14209566|dbj|BAB56062.1| putative protein kinase [Oryza sativa Japonica Group] >gi|53793572|dbj|BAD53342.1| putative protein kinase [Oryza sativa Japonica Group] >gi|113533903|dbj|BAF06286.1| Os01g0769700 [Oryza sativa Japonica Group] >gi|222619314|gb|E...	22.6435	18.9354	17.6109	31.4824	18.7691	17.1886	14.862	13.848	17.0557	21.1294	20.094	24.5324	19.4813	10.1819	13.8873	4.72714	0	3.56937	31.3802	24.9578	28.0436
XLOC_038035	Elongator complex protein [Medicago truncatula] >gi|355502108|gb|AES83311.1| Elongator complex protein [Medicago truncatula]	25.4416	28.5905	32.7365	28.8091	24.3675	25.5686	20.9711	23.6907	17.435	11.1263	9.85132	10.1427	11.2607	18.2078	16.5087	14.9283	22.6135	12.7251	11.9445	5.88725	9.42359
XLOC_042785	PREDICTED: uncharacterized protein LOC101500371 [Cicer arietinum]	0.625243	0.819029	2.25419	0.494031	0.597628	1.79912	44.8851	16.5675	3.2681	1.27882	1.28295	1.55851	1.61131	16.5738	25.6581	9.56508	3.31326	5.41484	2.61999	1.40836	1.55228
XLOC_076020	Os03g0317000 [Oryza sativa Japonica Group] >gi|108707830|gb|ABF95625.1| YT521-B-like family protein, expressed [Oryza sativa Japonica Group] >gi|113548412|dbj|BAF11855.1| Os03g0317000 [Oryza sativa Japonica Group] >gi|215704678|dbj|BAG94306.1| unnamed protein product [Oryza sativa Japonica Group]	7.55769	8.7976	6.95509	11.2679	9.04845	7.35279	29.0578	22.0149	19.7552	9.32977	10.5056	12.9284	12.5226	18.6216	17.0636	57.775	48.2345	67.8038	51.8636	26.5475	19.1887
XLOC_009160	hypothetical protein VITISV_034139 [Vitis vinifera]	15.8123	21.3925	17.0778	23.2979	15.6736	20.1731	180.371	91.9148	0	0.886529	0	0	3.28696	0	0	0	0	0	13.6531	6.03032	1.16038
XLOC_008341	PREDICTED: protein EIN4-like [Brachypodium distachyon]	6.22031	5.22321	6.83268	7.84488	6.58138	5.13639	4.09823	3.68719	0.608439	4.09342	5.76174	5.01902	3.99965	2.91205	2.42241	7.50866	5.9125	6.85465	22.254	3.43841	5.83881
XLOC_026350	Uncharacterized protein isoform 1 [Theobroma cacao]	1.47037	1.99207	0.906746	1.44367	2.46538	3.56504	2.41014	3.9949	6.86202	4.89544	6.89998	3.9139	7.46642	5.71239	6.74679	5.04423	4.93943	4.63992	2.13083	7.61737	3.06034
XLOC_015991	PREDICTED: polyphosphoinositide phosphatase-like, partial [Cucumis sativus]	2.27572	1.86384	1.52653	1.46736	1.48966	2.10622	1.08158	1.35156	5.33127	4.58075	3.92979	5.41773	5.60809	2.30671	0.832104	0.753527	0	0	0.725124	0.519369	0.56201
XLOC_091536	glutamine synthetase [Hevea brasiliensis]	0.903968	1.47669	1.34396	1.00192	0.540484	0.90708	1.02599	0.634135	3.74539	4.09255	4.62603	6.83498	5.0477	8.83341	4.70919	0	0	0.947304	1.60694	0.905627	0.940263
XLOC_034272	PREDICTED: uncharacterized protein LOC100854859 [Vitis vinifera]	6.46337	7.85328	4.85966	4.94102	4.37538	5.5417	0.318099	0.275633	9.06289	4.75295	3.66686	2.08663	3.0579	5.47534	2.28811	12.1542	2.04326	1.67459	5.42916	2.72986	3.06365
XLOC_074177	Region-like protein isoform 1 [Theobroma cacao]	17.8092	20.3558	20.8135	19.7731	21.1326	18.8609	25.5665	18.0101	8.31511	19.8228	21.211	23.5021	20.1872	10.4639	3.84194	8.16227	9.38771	13.6278	17.9357	8.87358	10.8309
XLOC_029802	PHD finger protein, putative, expressed [Oryza sativa Japonica Group]	1.34028	0.260109	0.901681	1.53846	0.863754	1.45085	0.362229	0.707229	0	0	0	0	0.146116	0	0	0	0	0	0	0	0
XLOC_017771	PREDICTED: uric acid degradation bifunctional protein TTL-like isoform X1 [Cicer arietinum]	4.6594	2.54234	2.2516	4.37813	3.88119	3.95042	15.1021	19.4315	1.41752	0.671091	6.94061	3.07162	4.78752	3.10176	3.74202	8.22529	9.05171	10.5915	3.0369	0.750134	0
XLOC_094128	unknown [Lotus japonicus]	9.15115	5.92919	8.81204	5.28761	6.89282	5.3787	2.63388	5.23651	3.31701	1.89448	1.36971	0.759191	0.821262	3.45483	2.49015	0	3.15904	4.32581	1.68214	1.57361	0.818561
XLOC_085339	unknown protein [Oryza sativa Japonica Group]	21.4457	19.6666	17.5417	16.0169	21.8686	16.1803	30.1226	31.1053	9.19072	26.3683	29.8398	24.3779	35.1858	26.9999	24.5029	52.7727	57.7964	76.0197	87.5583	26.6076	55.5313
XLOC_022312	Hydroxyethylthiazole kinase family protein [Theobroma cacao]	2.37946	2.99848	5.29969	2.30673	2.22525	2.34739	19.2615	10.9141	2.00273	1.8706	5.51871	1.144	0	3.3903	1.34535	1.91191	1.91064	1.17437	0.722742	0.797835	5.45267
XLOC_068037	hypothetical protein PRUPE_ppa000813mg [Prunus persica]	0.820904	0.572602	0.647148	1.198	0.660212	0.545088	3.98081	0.994219	0	0.384138	0.132631	0.130221	0.272206	0.374102	0.601243	0.611651	0	0	1.14975	0.899413	1.84935
XLOC_091436	hypothetical protein OsJ_25593 [Oryza sativa Japonica Group]	41.2203	35.5668	29.557	43.5268	30.8557	23.7431	3.42093	2.80768	53.4787	80.5588	80.4058	92.0256	73.5192	16.3879	12.9399	0.612554	0.621524	1.7171	20.0049	22.1579	29.6434
XLOC_040924	non-race specific disease resistance protein 1-like protein b [Coffea arabica]	0.933706	1.83419	2.99126	2.76922	1.81402	1.78728	28.0282	8.84852	0	0	0	0	0	0	0	0	0	0	0	0	0
XLOC_030956	Putative calcium-binding protein CML13 [Aegilops tauschii]	11.6059	11.5377	12.7486	12.5736	13.0035	13.292	8.38238	12.9715	26.2609	21.9323	21.4314	24.0233	30.1243	20.9592	6.53459	5.36468	5.87848	8.84294	3.06282	7.16481	6.16463
XLOC_019060	hypothetical protein PRUPE_ppa001208mg [Prunus persica]	44.7773	63.5415	35.8449	71.9916	58.6836	47.1262	24.7428	33.5636	58.8315	89.8178	68.7466	94.4206	67.7419	60.2314	30.7396	6.8329	3.54919	2.5659	9.9218	13.7985	10.2528
XLOC_027371	PREDICTED: PCI domain-containing protein 2 [Vitis vinifera] >gi|297738675|emb|CBI27920.3| unnamed protein product [Vitis vinifera]	4.89139	4.05598	0	3.62216	3.20918	5.62905	59.4553	25.7982	0	9.89233	23.523	20.9255	12.6445	11.2985	2.58601	0	0	0	4.13167	1.96708	1.79845
XLOC_043334	PREDICTED: protein CUP-SHAPED COTYLEDON 3-like [Solanum lycopersicum]	0.116239	0	0.127032	0.080968	0.0923716	0.233075	0.300772	0	0.875501	0.681569	0.276814	0.657505	1.32056	0	0	0	0	0	0.0833818	0	0.0427422
XLOC_075810	PREDICTED: probable pectate lyase 16-like [Glycine max]	0	0	0	0	0	0	0.354048	0.28501	0	0	0	0	0	0	0	0	0	0	0	2.09215	1.00265
XLOC_083411	photosystem I P700 apoprotein A1, partial (chloroplast) [Camellia sinensis]	17423.3	0	0	0	0	0	0	0	0	742.087	0	0	0	669.693	0	0	0	0	0	668.005	1569.63
XLOC_069325	uncharacterized protein LOC100811372 [Glycine max] >gi|255644593|gb|ACU22799.1| unknown [Glycine max]	23.9086	18.3473	11.6017	16.3223	18.9086	13.2504	5.44457	3.34329	6.9418	13.3149	7.31033	8.80991	9.57185	9.33939	18.9945	10.5497	10.7413	8.48852	8.55191	26.949	15.0117
XLOC_018390	unknown protein [Arachis diogoi]	1.07868	1.01134	1.51098	0.523246	1.75696	2.23269	18.7954	8.12074	1.65563	5.71073	4.51756	4.48853	8.33628	26.3715	21.282	28.8887	16.2588	35.0189	47.1219	4.71684	6.83868
XLOC_086465	WRKY DNA-binding protein 33 isoform 2 [Theobroma cacao]	0.976166	1.94748	4.14886	0.961148	0.668131	1.80928	33.4465	19.6664	11.0229	3.01888	2.72679	2.96174	3.4936	20.6414	12.1118	14.035	11.5052	19.3047	60.8447	34.3035	41.9316
XLOC_032075	PREDICTED: heavy metal-associated isoprenylated plant protein 26-like [Fragaria vesca subsp. vesca]	1.15402	3.33854	4.01675	1.15806	2.75466	5.69502	56.6449	3.48107	0.592165	1.19651	2.70096	0.751402	0.466632	13.2559	14.9388	22.8728	20.0723	31.6368	11.464	13.7546	11.5343
XLOC_022081	conserved hypothetical protein [Ricinus communis] >gi|223529934|gb|EEF31862.1| conserved hypothetical protein [Ricinus communis]	4.68741	5.06904	4.05191	4.65454	4.12551	5.25725	8.20518	4.59331	0.974087	4.3796	4.69197	3.12799	4.61386	5.87728	8.36829	0.485468	1.53139	1.4159	1.98346	3.67123	6.17843
XLOC_053682	Late embryogenesis abundant hydroxyproline-rich glycoprotein family [Theobroma cacao]	0	0	0.420586	0	0.139381	0.497698	0	0	1.69261	1.58191	0.963401	1.62934	3.01274	0.409135	0	4.57323	2.5417	2.26299	11.9967	0	0.362423
XLOC_085644	uncharacterized protein LOC100501426 [Zea mays] >gi|238009206|gb|ACR35638.1| unknown [Zea mays]	0.26688	0	0	0	0.274126	0.146497	0.226333	0	0.000215428	0.195105	0	0	0	0.268078	0	0	6.31e-05	0	0	0	0
XLOC_071828	predicted protein [Populus trichocarpa] >gi|222870829|gb|EEF07960.1| predicted protein [Populus trichocarpa]	0.621518	0.0639372	0.00125691	11.0339	8.23591	11.2016	0	5.82041	2.72883	5.28367	0	0	1.53236	0.612487	0	5.48739	0	0	0	0	0
XLOC_009941	MADS box transcription factor 6 [Oncidium hybrid cultivar]	15.4197	20.7544	26.841	16.9837	20.3553	21.5378	0.340353	0	0	0	0	0	0	0	0	0	0	0	76.4825	0.26748	0.442959
XLOC_087898	UDP-T1 [Oryza minuta]	23.8505	7.82758	29.494	27.8692	55.3672	32.6473	1052.04	519.206	0	0	0	0	0	0	0	0	0	0	0	0	0
XLOC_088493	DRE-binding protein DREB1 [Cymbidium insigne]	8.26031	12.583	12.7825	7.83389	8.41093	10.088	255.139	45.2369	22.6251	33.062	25.8585	25.6896	32.6865	91.7721	151.346	62.9333	65.165	82.0129	226.199	57.9957	76.8764
XLOC_001314	PREDICTED: uncharacterized protein LOC101217801 isoform 1 [Cucumis sativus] >gi|449517239|ref|XP_004165653.1| PREDICTED: uncharacterized protein LOC101225552 isoform 1 [Cucumis sativus]	174.749	164.358	155.863	176.91	173.994	139.912	358.604	174.424	73.1903	266.71	366.332	317.837	130.653	53.6813	11.6257	29.1102	25.6628	7.33395	26.5087	75.8952	26.9471
XLOC_020986	endomembrane protein emp70, partial [Solanum tuberosum]	21.2858	17.2693	18.4632	22.2188	20.7118	22.1053	48.2585	23.9947	60.4546	67.9052	68.0076	64.2629	72.8319	58.6645	35.4104	15.4124	5.47307	12.6139	29.3957	3.51599	30.375
XLOC_006044	Uncharacterized protein TCM_014721 [Theobroma cacao]	26.6428	32.943	49.5442	41.184	27.8132	25.4808	46.6332	57.3385	7.42667	35.9805	30.9744	23.412	41.8632	146.109	148.135	21.7651	20.4278	26.2114	25.8255	17.7703	19.2925
XLOC_052715	peptidyl prolyl cis trans isomerase-like [Oryza sativa Japonica Group]	70.4372	56.7746	49.5484	71.2181	60.0745	62.924	45.491	29.5837	39.0322	43.5441	43.0812	46.8422	41.3904	50.1386	41.7291	24.3304	11.0495	11.5321	21.8201	23.7789	23.0437
XLOC_031961	dynamin family protein [Musa balbisiana]	3.19075	2.03706	1.60115	3.92819	1.58487	3.04147	0	0.606589	0	0.489617	0.584699	0.345176	0.263041	0	0	0.138673	0.456219	1.06998	0.109813	0.837405	1.1784
XLOC_031572	putative staygreen protein [Nicotiana tabacum]	4.83799	3.91676	18.1722	5.4817	3.98321	6.78034	50.7929	12.1864	0.549875	0.525083	0.263473	0.518323	0.999735	5.37569	8.82003	17.3267	15.1824	20.6822	749.713	16.9452	21.7053
XLOC_021253	hypothetical protein VITISV_009629 [Vitis vinifera]	3.39992	2.11643	0.733292	1.78745	2.38424	3.22034	1.46444	2.30605	0.333746	0	0	0.0697088	0	0.0957604	0	0	0	0	0.231084	0.190315	0.0279571
XLOC_030682	prli-interacting factor l, putative [Ricinus communis] >gi|223543331|gb|EEF44863.1| prli-interacting factor l, putative [Ricinus communis]	25.1174	30.9271	30.4475	28.6538	36.4196	30.1794	67.3671	30.6473	46.2301	44.2311	47.1577	47.3098	51.0978	133.128	147.552	177.79	226.631	222.444	99.0164	47.2562	47.7948
XLOC_007360	PREDICTED: paladin [Vitis vinifera]	8.06342	8.34165	8.11831	6.82271	7.7891	8.95507	3.10083	2.29635	28.83	29.4429	35.473	37.8123	32.2817	13.6071	6.91252	3.68892	2.89386	3.98887	8.71315	4.59651	6.53052
XLOC_052166	WD40, G-beta domain containing family protein, family [Zea mays]	0.103546	0.0985832	0	0.0704815	0.248436	0.137886	0.780719	0.501461	2.18364	3.20145	1.51618	2.38267	1.26803	1.09462	1.66279	1.45237	2.17855	0	1.98792	7.75202	9.66323
XLOC_001108	PREDICTED: LOW QUALITY PROTEIN: protein MON2 homolog [Solanum lycopersicum]	0.411994	0	0	0.305196	0.160308	0	4.73728	0.481817	0.110482	0.240929	0.756384	1.09803	1.3845	0.343597	0	0	0	0	0	0.251655	0.844216
XLOC_061606	PREDICTED: uncharacterized protein LOC101493331 [Cicer arietinum]	6.02742	4.89782	4.42499	4.89687	4.42683	4.7007	4.85616	5.24459	1.26612	3.02586	2.83323	2.94169	2.00221	3.79215	6.31538	5.75452	2.68544	6.81929	3.52398	3.32324	5.19201
XLOC_054390	TPA: hypothetical protein ZEAMMB73_368984 [Zea mays]	2.55613	3.52714	1.67615	4.41807	2.44739	1.5715	3.45497	6.14993	2.41109	5.29565	5.59807	6.22701	10.1619	3.51896	1.97375	11.3593	9.10834	18.5914	6.65419	1.9226	0.726411
XLOC_004081	PREDICTED: alpha,alpha-trehalose-phosphate synthase [UDP-forming] 6-like [Cicer arietinum]	0.682192	0.189382	3.10464	0.547687	1.26949	0.531226	7.9282	6.26379	4.06303	1.36494	1.31933	1.21128	3.17342	1.03481	1.09739	10.5598	11.3957	10.8103	50.0213	2.90639	2.49262
XLOC_086955	PREDICTED: probable LRR receptor-like serine/threonine-protein kinase At1g67720 [Vitis vinifera] >gi|297737017|emb|CBI26218.3| unnamed protein product [Vitis vinifera]	2.41374	2.70993	2.65935	3.2563	2.40029	2.36944	3.01359	2.63309	3.55472	9.09471	7.00071	8.90081	10.7023	2.78126	5.24601	0	0	0	0.621285	0.219608	0.248763
XLOC_041481	conserved hypothetical protein [Ricinus communis] >gi|223539113|gb|EEF40709.1| conserved hypothetical protein [Ricinus communis]	0.458858	0	0.383792	0.21185	1.02941	0	0	0	9.56829	1.95261	2.67707	2.31127	3.9901	0.471216	1.83641	0	0	0	0.773748	0.867332	0.593031
XLOC_023003	hypothetical protein OsI_05742 [Oryza sativa Indica Group] >gi|222622117|gb|EEE56249.1| hypothetical protein OsJ_05271 [Oryza sativa Japonica Group]	6.21838	4.63927	4.87342	7.29247	6.08317	5.66955	40.5343	17.1651	7.24379	16.2665	17.3623	14.5001	19.8866	9.24719	17.6579	0.488727	0.488989	4.42915	38.0176	1.25564	8.73913
XLOC_079058	NAC domain protein [Cymbidium hybrid cultivar]	2.87668	2.69156	25.4953	5.48884	2.93144	6.20678	197.346	17.2405	0.537435	1.13718	1.13123	2.29475	2.35962	43.349	22.1099	27.2259	27.0129	22.5394	81.5934	11.5184	13.1093
XLOC_081184	phosphatidate phosphatase [Jatropha curcas]	121.748	97.564	115.679	122.829	92.9635	80.0082	11.2263	16.7048	6.24422	16.4533	26.7023	12.3712	35.5904	12.2548	8.43632	6.38358	0	0	2.27074	10.8004	1.89876
XLOC_003757	PREDICTED: pentatricopeptide repeat-containing protein At2g40720-like [Vitis vinifera]	0.543385	0.724701	1.18279	0.592745	0.434674	0.361975	0.547466	0.375363	1.97093	0.124695	0	0	0.222253	0	0	0.760232	0	0	0.0719605	0	0
XLOC_091288	cellulose synthase-like protein H1 [Avena sativa]	1.67263	6.981	9.54185	3.3319	2.77962	7.72221	17.9409	7.14517	5.34383	6.42631	3.27331	9.62654	5.70118	27.3583	37.1849	29.0088	16.7507	30.5975	43.0922	5.82826	8.1061
XLOC_018168	expansin A2 [Musa acuminata AAA Group]	0.0489949	0	0.105526	0	0	0	0	0.0676107	0	0.111613	0.663534	1.04487	0	0	0	0	0	0.756758	0	0	0
XLOC_066342	Protein kinase APK1B, chloroplast precursor, putative [Ricinus communis] >gi|223529494|gb|EEF31450.1| Protein kinase APK1B, chloroplast precursor, putative [Ricinus communis]	2.49387	2.8063	4.29967	2.1595	3.36411	3.49511	4.30157	4.21003	0	0.221989	0.0573236	0.222839	0	3.65475	6.73521	0	0	0	0.818604	2.20012	3.58303
XLOC_046758	PREDICTED: pentatricopeptide repeat-containing protein At5g66520 [Vitis vinifera]	8.50941	7.43314	6.39403	11.0804	9.10296	8.11984	3.16354	4.3608	11.6375	6.37915	4.49883	3.69006	5.05361	5.49251	2.98777	0	1.11542	0	2.38458	3.18447	5.57394
XLOC_025506	hypothetical protein OsJ_25200 [Oryza sativa Japonica Group]	2.25158	1.59947	2.38526	1.50573	2.27385	2.23458	2.80012	2.03867	0.865292	2.54499	2.92682	2.81315	3.75151	1.66521	5.72306	4.5364	0	2.59725	5.64556	1.78621	2.76982
XLOC_004221	predicted protein [Populus trichocarpa] >gi|222870884|gb|EEF08015.1| predicted protein [Populus trichocarpa]	2.97274	1.84861	2.85111	3.72641	2.67763	2.78645	4.23498	4.83482	5.83199	7.60568	6.65006	9.42488	10.072	5.38859	4.60604	1.69897	2.1079	3.07339	2.09991	4.94821	4.7035
XLOC_050399	unknown [Populus trichocarpa x Populus deltoides] >gi|118489750|gb|ABK96676.1| unknown [Populus trichocarpa x Populus deltoides]	0.160307	0.307244	1.05687	0.222195	0.771155	0.214646	5.16112	1.63602	1.11074	1.68917	1.83688	1.67207	1.50554	20.0926	18.8918	40.4584	53.58	49.2819	6.06315	4.0185	4.47275
XLOC_055630	RecName: Full=Spindle and kinetochore-associated protein 1 homolog >gi|218199611|gb|EEC82038.1| hypothetical protein OsI_26011 [Oryza sativa Indica Group]	0.0759883	0	0.333466	0.630267	0.121802	0.203327	0.390012	0.414608	0	0.266023	0	0	0	0	0	0	0	0	0	0	0.12548
XLOC_084227	PREDICTED: cullin-3B [Vitis vinifera] >gi|147833364|emb|CAN72935.1| hypothetical protein VITISV_020617 [Vitis vinifera]	19.9315	15.9037	18.5994	20.6003	15.4551	15.1395	10.0543	6.62518	23.995	26.263	27.1047	30.2637	22.1639	19.6416	14.6574	4.97829	5.58475	6.95959	13.7375	10.2856	11.3871
XLOC_050058	PREDICTED: epoxide hydrolase 2-like [Glycine max]	4.72509	1.18117	4.20232	1.39338	0.964162	3.69194	10.7948	37.2723	0	2.09432	0.464	0.915425	0	1.72246	0	10.0349	26.7599	14.8278	12.7163	72.2934	116.531
XLOC_059157	hypothetical protein PRUPE_ppa022694mg [Prunus persica]	0	0	0	0	0.24622	0	33.0912	0	0	0	0	0	0	0	0	0	0	0	0	0	0
XLOC_070460	PREDICTED: potassium transporter 2-like [Cucumis sativus] >gi|449491659|ref|XP_004158966.1| PREDICTED: potassium transporter 2-like [Cucumis sativus]	6.19109	5.53596	6.19089	4.97545	5.59033	3.95748	0.837718	1.35564	4.90309	5.87127	6.80958	7.43509	5.16471	2.38058	4.03641	0.911072	2.73322	4.18821	2.96833	2.47128	3.82737
XLOC_073721	PREDICTED: uncharacterized protein LOC100244357 [Vitis vinifera] >gi|296089782|emb|CBI39601.3| unnamed protein product [Vitis vinifera]	1.56364	4.04638	4.56805	2.92244	2.26935	2.04392	6.89211	5.52689	0.139392	1.48912	2.39433	1.49026	2.64453	3.71625	4.76978	0	0	1.02251	3.79316	0	1.81575
XLOC_058047	Os08g0440000 [Oryza sativa Japonica Group] >gi|42408665|dbj|BAD09885.1| putative Golgi SNARE protein [Oryza sativa Japonica Group] >gi|113623869|dbj|BAF23814.1| Os08g0440000 [Oryza sativa Japonica Group] >gi|215686378|dbj|BAG87639.1| unnamed protein product [Oryza sativa Japonica Group] >gi|21573488...	1.66393	1.29935	3.31138	3.05497	2.99498	1.65163	4.07043	11.8102	0	0.42133	0.281653	0.133056	0.119349	1.31929	0.721615	0	0.000512927	3.28913	1.66166	3.33292	2.2305
XLOC_051721	Phosphatidylinositol 4-kinase [Medicago truncatula] >gi|355492935|gb|AES74138.1| Phosphatidylinositol 4-kinase [Medicago truncatula]	19.6737	16.7006	8.40799	12.403	16.1985	15.8605	4.00196	2.23798	31.9581	18.6779	19.2293	20.6192	11.9526	8.32401	3.73565	2.93068	2.20622	1.29063	16.1883	19.2425	17.5669
XLOC_063185	predicted protein [Populus trichocarpa] >gi|222833778|gb|EEE72255.1| predicted protein [Populus trichocarpa]	6.35969	7.9589	0.760365	9.74364	7.11867	4.66849	0	0.403121	1.91034	15.6086	23.8442	9.50782	14.3265	7.92452	0.330731	0	0	0	0	1.19113	0
XLOC_016801	predicted protein [Populus trichocarpa] >gi|222870870|gb|EEF08001.1| predicted protein [Populus trichocarpa]	7.49864	7.31342	4.49133	6.03009	4.26225	5.53796	1.72815	1.67391	4.77326	8.53497	7.37481	8.85915	5.06248	5.59936	4.511	1.3358	2.62153	5.21211	2.59958	3.11931	4.67525
XLOC_032011	tau glutathione S-transferase [Allium cepa]	1.38257	4.21113	5.69493	1.93198	1.84963	4.02099	30.2071	37.3287	5.34226	2.76118	4.0394	4.00816	2.47488	28.8395	16.0725	45.6916	43.6757	36.6123	18.2512	53.1712	25.3912
XLOC_086437	PREDICTED: vinorine synthase-like [Glycine max]	5.19048	4.43471	4.64351	4.02296	4.77316	4.20827	3.40252	2.32445	3.09074	5.2096	5.53953	6.25386	5.81492	3.81455	5.6095	4.97447	5.29502	2.99899	3.29757	2.69784	3.6943
XLOC_019544	hypothetical protein TRIUR3_21458 [Triticum urartu]	2.16757	2.31341	3.40371	2.36984	2.28125	2.63933	4.13388	1.72956	4.59109	5.43033	5.99169	6.64505	6.27894	12.3864	12.803	0.353639	1.41617	1.29691	1.56497	1.91499	2.33753
XLOC_079354	PREDICTED: 125 kDa kinesin-related protein-like [Setaria italica]	2.28825	1.54274	1.94436	2.77105	0	2.13369	0	0	0	1.53716	5.87226	0	1.58756	2.79356	4.12563	0	0	0	0	0	2.73605
XLOC_076635	PREDICTED: interactor of constitutive active ROPs 3-like isoform 1 [Glycine max] >gi|356542563|ref|XP_003539736.1| PREDICTED: interactor of constitutive active ROPs 3-like isoform 2 [Glycine max]	0	0	0	0	0	0	1.79343	3.15341	0	0	0	0	0	0	0	0	0	0	0	0	0
XLOC_010998	PREDICTED: uncharacterized protein At5g41620-like [Vitis vinifera]	8.34767	8.11258	6.67861	8.19216	6.8876	10.2259	2.1006	2.12553	19.0344	16.6257	16.0838	23.1727	19.0092	7.72367	5.21972	8.29208	6.84274	8.37022	7.73251	4.6294	6.48316
XLOC_009946	PREDICTED: serine/threonine-protein kinase Nek2-like [Glycine max]	0.139584	0	0.152786	0.0960993	0	0	0.356288	0.382188	0	0.891532	0.166556	0.319746	0.650107	0.574956	0.293917	0	0	0	0.462711	0.0841515	0.193848
XLOC_025375	Os12g0284000 [Oryza sativa Japonica Group] >gi|77554669|gb|ABA97465.1| regulator of chromosome condensation, putative, expressed [Oryza sativa Japonica Group] >gi|77554670|gb|ABA97466.1| regulator of chromosome condensation, putative, expressed [Oryza sativa Japonica Group] >gi|108862484|gb|ABA97467...	1.42	1.82791	3.56352	1.68576	1.51728	1.87457	10.0638	4.65958	0.428991	1.49622	1.60482	1.66661	1.98232	1.1909	0.577128	0.493347	0.246037	1.74101	1.90683	0.487821	1.91196
XLOC_044583	ribosomal protein L2 [Eschscholzia californica]	2.73272	0	0	4.12392	0.220192	0.184981	0.370157	0.719925	0.153416	0.83722	1.05088	1.01579	0.447849	6.15129	1.6264	1.76776	8.8388	2.671	3.46122	3.24826	9.25248
XLOC_043663	hypothetical protein PRUPE_ppa007799mg [Prunus persica]	52.1757	77.6411	91.0799	22.1171	51.2641	51.57	677.759	106.194	83.1099	128.973	184.748	129.656	49.2568	87.4562	372.315	791.855	777.994	263.612	126.373	69.8657	238.537
XLOC_034380	unknown [Glycine max]	67.1049	53.1521	62.879	75.0215	52.9966	55.2008	10.3039	5.61513	78.981	196.918	290.164	209.889	158.652	71.539	87.985	11.1131	15.6192	15.8581	80.4516	27.8067	24.2978
XLOC_061023	Arabinogalactan protein 22, putative [Theobroma cacao]	0	0	0	0	0	0	2.88924	7.63164	0	0	0	0.641382	0	4.01799	1.37933	0	0	0	0.296694	0	0.169969
XLOC_062983	predicted protein [Populus trichocarpa] >gi|118481523|gb|ABK92704.1| unknown [Populus trichocarpa] >gi|222858598|gb|EEE96145.1| predicted protein [Populus trichocarpa]	24.6642	30.0037	30.9515	22.8349	30.4522	31.8784	15.4188	19.9087	31.7472	59.6846	68.7014	73.1928	71.8591	78.1119	45.2808	169.874	137.514	176.003	28.8225	20.4496	23.484
XLOC_007923	PREDICTED: LOW QUALITY PROTEIN: homogentisate 1,2-dioxygenase [Solanum lycopersicum]	17.4565	10.6899	14.9561	12.6936	8.6635	12.9486	41.2988	29.1141	0.741636	5.63224	3.12004	4.67916	2.05991	4.77921	5.00529	0	0	0	1.48592	0.137107	3.09745
XLOC_002736	hypothetical protein CARUB_v10002094mg, partial [Capsella rubella]	141.522	145.026	114.126	150.936	158.999	138.221	94.9624	86.9162	0.205937	0.875906	0.11477	1.24012	0.315246	2.85029	0.172341	1.57123	0	0	6.08975	0.0856966	0.949611
XLOC_085067	synaptotagmin, putative [Ricinus communis] >gi|223547689|gb|EEF49182.1| synaptotagmin, putative [Ricinus communis]	3.41726	3.75632	4.23707	3.97266	2.30845	5.61144	1.18646	0.40432	5.65671	6.09565	5.16911	5.55324	2.81309	2.07129	2.06204	8.54	4.8568	8.50267	16.9482	1.80183	2.22134
XLOC_028523	ethylene receptor [Persea americana]	2.33475	1.92035	2.12405	2.557	1.77819	1.88547	6.02707	2.48596	4.50946	2.3241	2.49474	3.24018	2.24818	1.98653	3.25214	1.57699	0.477223	1.92886	8.63657	1.95357	2.86837
XLOC_045319	PREDICTED: histidine kinase CKI1-like [Glycine max]	3.25731	2.57966	3.03879	3.44717	3.04039	3.31077	0.734567	0.91934	0	0.572155	0.152418	0.0816008	0.0686247	0	0.330605	0	0	0	0.277785	0.401967	0.280804
XLOC_036370	Leucine-rich repeat transmembrane protein kinase [Theobroma cacao]	2.15948	1.69947	1.55516	2.31991	1.51767	2.45137	3.01826	6.55484	0	0.148045	0	0.363435	0.0643036	0	0	0	0	0	1.40732	0.472189	0.121601
XLOC_035552	putative WRKY transcription factor 50 [Triticum urartu]	0.116096	0	0	0.154014	0.0918448	0.0828876	0.132977	1.48704	0	0	0.067392	0	1.32e-06	0	0	0	0	0	0	0.600374	1.02017
XLOC_032333	hypothetical protein VITISV_017171 [Vitis vinifera]	0.233718	0.118219	0.38282	0.196951	0.0491045	0.0407408	0.406123	0.227509	0.225048	0	0.0413046	0.112719	0.0358706	2.97575	3.54318	63.6766	55.8447	72.0849	55.9746	5.97396	6.88076
XLOC_054131	PREDICTED: flocculation protein FLO11-like [Cicer arietinum]	9.17514	11.9406	21.3696	10.78	14.2687	14.4724	44.6746	17.1453	7.26732	9.62626	8.06446	8.6488	7.89291	17.5945	16.7105	34.9274	30.3317	42.9516	34.3727	12.4659	19.6713
XLOC_074377	predicted protein [Populus trichocarpa] >gi|222839392|gb|EEE77729.1| predicted protein [Populus trichocarpa]	11.6481	9.50471	10.4127	14.3893	13.9058	9.37491	9.12475	6.46495	46.3839	40.5119	49.0267	46.6037	40.4403	17.6013	10.439	15.8938	6.14289	12.5511	14.8626	19.2854	18.4132
XLOC_026924	PREDICTED: uncharacterized protein LOC100257058 isoform 1 [Vitis vinifera]	9.93851	9.62045	9.8428	8.63786	9.0416	6.19887	12.5573	12.3367	4.12315	1.7062	3.94587	2.97008	2.36649	8.35894	16.5738	17.5527	7.86584	8.8049	6.40955	14.3228	25.8074
XLOC_046605	hypothetical protein PRUPE_ppa007470mg [Prunus persica]	7.46723	11.4314	6.96943	6.44805	8.8194	12.8983	1.02251	0.8182	3.55703	2.12987	1.99668	1.63648	2.03207	0.272944	0.112618	2.36075	0.953893	0.754153	2.1256	0.667958	0.923172
XLOC_019609	predicted protein [Hordeum vulgare subsp. vulgare]	0	0	0	0	0	0	0	0	1.52513	0	0.140475	0.131039	0.254705	2.4113	2.71803	1.46666	0	0	3.04964	0.255905	0.678342
XLOC_002959	unnamed protein product [Vitis vinifera]	0.363379	0.200478	0.564335	0.60419	0.474725	0.486063	1.2824	3.30763	3.53291	6.56201	8.2968	8.21166	7.63224	3.6714	2.33542	0.482668	0.472122	0	1.85264	1.29998	1.95927
XLOC_068074	hypothetical protein SELMODRAFT_415131 [Selaginella moellendorffii] >gi|300157269|gb|EFJ23895.1| hypothetical protein SELMODRAFT_415131 [Selaginella moellendorffii]	12.6694	8.58499	10.2529	10.1101	8.78481	8.96029	3.83923	2.02532	9.59135	23.4759	17.4143	17.9791	15.7522	1.66054	1.71732	4.8156	4.78782	3.683	3.07629	2.04064	5.09641
XLOC_000818	Peroxisomal membrane ABC transporter family isoform 1 [Theobroma cacao]	3.16823	11.0056	6.80879	2.9825	4.5314	9.88535	19.5726	16.0594	13.0295	18.0836	9.8309	12.259	16.0495	10.4927	11.5406	3.158	3.66338	4.75094	2.61117	5.26225	3.22032
XLOC_003127	PREDICTED: LAG1 longevity assurance homolog 2-like [Fragaria vesca subsp. vesca]	21.2899	9.40022	10.8102	21.7804	20.019	11.738	11.2781	16.6761	21.7941	43.7764	88.1895	56.4992	97.278	18.9619	34.3737	34.3191	22.3657	7.47428	5.30719	24.9086	24.2755
XLOC_093355	PREDICTED: pyridoxal biosynthesis protein PDX2-like [Brachypodium distachyon]	24.262	22.3337	22.4966	19.9961	22.9181	21.0924	21.5546	19.6488	10.5834	13.9198	15.6321	15.1664	15.3022	21.8183	31.2629	34.7875	37.5872	14.8081	31.7303	16.1275	16.3277
XLOC_071021	unnamed protein product [Vitis vinifera]	15.6711	13.374	14.8636	14.1733	18.7861	13.1266	30.3796	42.0378	11.1921	15.1759	25.213	17.0993	16.9027	21.6621	20.8653	0	4.00268	1.65618	1.70451	0.654359	4.33814
XLOC_053997	PREDICTED: uncharacterized protein LOC100826478 [Brachypodium distachyon]	0.541564	0	0	0	0	0	10.9265	4.54771	1.43671	0.936286	0	0	0	0	0.827464	0	0	0	4.22584	0.912225	2.22986
XLOC_009793	unknown [Lactuca sativa] >gi|255032948|gb|ACT99190.1| unknown [Lactuca sativa] >gi|255032950|gb|ACT99191.1| unknown [Lactuca sativa] >gi|255032952|gb|ACT99192.1| unknown [Lactuca sativa] >gi|255032954|gb|ACT99193.1| unknown [Lactuca sativa] >gi|255032956|gb|ACT99194.1| unknown [Lactuca sativa] >gi|2...	0.150996	0	0	0.104334	0.121011	0.302993	0	0.206025	2.44693	1.84943	2.08428	1.47957	3.29668	0.499637	0	0	0	0	0.100154	0	0
XLOC_016599	expressed protein [Oryza sativa Japonica Group]	396.864	455.704	540.042	961.036	538.202	495.85	0	134.16	318.03	356.839	947.44	874.487	271.269	159.989	228.826	33.2925	29.5146	1773.75	170.381	122.066	120.998
XLOC_040458	crinkly4-like protein [Musa acuminata]	3.30671	1.92683	0	2.394	2.33635	2.00547	0	0.514221	0.440033	1.56189	1.02053	0.989159	0.749724	0.953876	0	0	0	0	2.49601	0.829419	2.88785
XLOC_035539	predicted protein [Populus trichocarpa] >gi|222869800|gb|EEF06931.1| predicted protein [Populus trichocarpa]	5.56166	6.97165	10.7992	5.5154	5.38863	7.66577	18.1895	4.07942	10.2716	8.42339	9.26517	10.6926	12.1536	88.2759	98.0557	30.456	25.8837	33.4797	15.586	12.3663	18.3423
XLOC_072984	hypothetical protein PRUPE_ppa001407mg [Prunus persica]	1.66214	1.88208	1.0817	1.94052	1.5941	1.42013	0.358858	0	0	0.9676	1.18194	0.831633	0.672973	0.845995	1.49025	0	0	0	1.7532	0.965136	1.6445
XLOC_013742	Early nodulin-like protein 15, putative [Theobroma cacao]	21.5748	7.9329	14.7617	27.541	13.5551	19.7841	3.75884	14.908	4.50017	0	1.9175	0.56397	0	0.162417	0	37.4954	32.0198	33.5218	32.2632	70.0734	20.9067
XLOC_070823	PREDICTED: uncharacterized protein LOC100778230 [Glycine max]	36.4067	38.3853	44.4233	43.1934	41.5164	43.8807	12.4523	13.6842	22.7146	14.7932	15.7889	15.8385	11.0098	17.6212	18.5162	0	1.97334	0	12.1028	3.56001	3.12122
XLOC_033785	PREDICTED: potassium transporter 11-like [Solanum lycopersicum]	0.62152	3.90149	3.9077	0.923927	1.01762	1.31772	0.194249	0.165569	4.38493	19.2407	40.0633	7.66811	56.1373	2.27337	0.250926	0	0	0	1.53817	1.63413	0.0368914
XLOC_093488	Protein brittle-1, chloroplast precursor, putative [Ricinus communis] >gi|223547004|gb|EEF48501.1| Protein brittle-1, chloroplast precursor, putative [Ricinus communis]	6.17063	4.89992	4.52542	6.13563	5.99506	5.77495	7.58938	13.1989	8.59895	6.97419	7.93715	9.2332	6.77003	5.05616	6.1919	6.02683	6.32251	8.69796	6.71681	5.06225	6.75928
XLOC_076604	Polynucleotidyl transferase, ribonuclease H-like superfamily protein isoform 1 [Theobroma cacao]	2.8451	1.95179	2.61356	3.09951	3.02745	2.26322	1.47813	1.18217	4.28714	0.791959	0.818723	0.61613	0.793083	1.71882	1.83475	5.56456	3.04016	3.29841	4.90559	2.23313	3.05629
XLOC_062264	glutamine synthetase I [Secale cereale x Triticum durum]	0.0792871	0	0	0	0	0	1.60255	2.1535	0.0890909	1.24391	1.12712	1.47972	0.318664	0.92598	0.163849	0	0	0	0.0908324	0.160213	0.519511
XLOC_087040	predicted protein [Populus trichocarpa] >gi|222858481|gb|EEE96028.1| predicted protein [Populus trichocarpa]	0	0	0	0	0	0	0.539462	1.51674	1.28948	0.734245	1.39494	0.854893	0.872656	0.34657	0	0	1.37079	0	0	0	0
XLOC_073179	hypothetical protein VITISV_038820 [Vitis vinifera]	1.27929	0.687807	0.864117	1.53954	2.03597	1.25843	0.331873	1.76503	0	1.59827	1.3007	1.0061	1.0399	0.475945	0.434666	0	0	0	0.17546	1.82145	0.507781
XLOC_070445	Chaperone protein dnaJ, putative [Ricinus communis] >gi|223551466|gb|EEF52952.1| Chaperone protein dnaJ, putative [Ricinus communis]	234.545	318.252	277.816	513.901	265.918	258.239	224.667	83.4282	419.505	474.281	1185.52	945.353	475.704	214.852	182.918	185.493	139.119	207.428	160.051	107.528	34.6196
XLOC_009863	unnamed protein product [Vitis vinifera]	0.220418	0.312196	0.405567	0.268995	0.124643	0.662171	0.323055	0.820018	0.0791529	0.011329	0	0.0283475	0	0.0162966	0	0	0.120614	0.146234	0.0123791	0.0493016	0.033153
XLOC_080458	PREDICTED: putative mediator of RNA polymerase II transcription subunit 6 [Vitis vinifera]	3.92267	2.27052	1.92132	4.95883	3.70119	2.01431	6.50809	4.76042	0	0.0937228	0.0971594	0.0953482	0.247893	1.88447	5.90305	0	0	0	1.938	0.622134	2.42284
XLOC_056847	unnamed protein product [Thellungiella halophila]	0	0.0726595	0.248483	0.0516702	0.0611521	0.152516	0.0951049	0.160172	0	0.0867577	0.0442332	0	0.193281	0.0616554	0	0	0	0	0	0	0.0223078
XLOC_092042	unknown [Picea sitchensis] >gi|224285325|gb|ACN40387.1| unknown [Picea sitchensis] >gi|224286322|gb|ACN40869.1| unknown [Picea sitchensis]	0	0.97985	0.576449	0.756989	0	0.681117	110.93	4.8824	11.576	51.0016	51.3076	57.3816	89.256	140.435	72.5193	269.986	255.47	299.536	128.959	48.5176	80.1484
XLOC_040848	PREDICTED: uncharacterized protein LOC101771504 isoform X2 [Setaria italica]	16.0087	10.513	12.5557	14.6254	18.6873	15.1101	31.8559	17.8322	10.1041	27.7049	32.5207	28.975	37.6654	50.6046	29.2927	0	10.6155	6.52698	22.4526	41.4182	29.8832
XLOC_089205	ATP synthase CF1 beta subunit [Phalaenopsis aphrodite subsp. formosana] >gi|118573716|sp|Q3BAN5.1|ATPB_PHAAO RecName: Full=ATP synthase subunit beta, chloroplastic; AltName: Full=ATP synthase F1 sector subunit beta; AltName: Full=F-ATPase subunit beta >gi|58802787|gb|AAW82507.1| ATP synthase CF1 bet...	0	0	0	0	0	0	0	0	0	0.996034	2.08308	3.01993	1.184	7.74089	0	0	0	0	1.98822	0.153632	0.411676
XLOC_038731	PREDICTED: cellulose synthase-like protein E6-like isoform X1 [Setaria italica]	0	0	0.20686	0.725803	0.0424406	0	0	0	0	6.92e-05	0	0	0	0.305003	0	0.841105	2.27729	1.09099	0	1.06283	2.59147
XLOC_057369	PREDICTED: uncharacterized protein LOC100821058 [Brachypodium distachyon]	1.38185	1.3704	1.35946	1.10767	1.2019	1.11843	0.581644	1.79167	5.06775	6.26808	8.91	9.74802	9.23074	4.16396	6.2062	0.279118	0	0.210811	1.37764	2.95569	3.74006
XLOC_042756	predicted protein [Hordeum vulgare subsp. vulgare]	1.67835	1.73829	1.83718	2.11859	1.79254	2.05591	1.42816	0.765836	7.87402	10.0711	9.84781	11.055	8.68632	1.61325	2.35572	2.89055	0	2.21275	3.15274	0.843078	0.543745
XLOC_000961	PREDICTED: shikimate O-hydroxycinnamoyltransferase-like [Setaria italica]	0.129576	0.251207	0	0.185388	0	0	1.04634	0.514101	0	0.631474	0.494405	1.27339	3.23704	2.00848	0.258637	1.68728	1.68728	2.55279	0.345311	0	0.06611
XLOC_031902	Os11g0552600 [Oryza sativa Japonica Group] >gi|113645306|dbj|BAF28447.1| Os11g0552600, partial [Oryza sativa Japonica Group]	23.6071	30.0951	18.4748	31.0058	26.9973	25.6402	2.68764	11.2202	19.7034	20.191	29.2331	16.0988	17.1463	0.879233	2.02984	2.40705	2.29907	5.57089	7.16623	8.48106	5.8463
XLOC_083586	unnamed protein product [Vitis vinifera]	0.703571	1.61762	0.343262	1.64948	0.36381	0.888599	1.49838	0.752979	0.639152	0.898958	1.38916	1.99976	0.0483142	3.6497	0.086483	0	0	0	3.11334	0	2.51523
XLOC_047911	predicted protein [Populus trichocarpa] >gi|222857465|gb|EEE95012.1| predicted protein [Populus trichocarpa]	3.97766	2.72032	5.37229	1.9526	1.49509	1.35116	0.539182	1.53851	0	0.624349	0.879767	0.313552	2.09972	2.66797	2.92519	0.861032	2.53778	0	0.0845384	0.816686	1.82754
XLOC_082617	BTB/POZ domain-containing protein TNFAIP1 isoform 1 [Theobroma cacao]	21.0528	31.2007	30.6217	18.4376	23.4096	27.9925	19.051	14.4138	10.7514	8.27686	8.77291	6.73092	7.02394	24.1865	22.6413	13.6531	10.6397	22.3913	10.5507	7.47149	6.76021
XLOC_000432	hypothetical protein F775_26280 [Aegilops tauschii]	410.21	500.836	419.836	805.527	568.32	687.183	472.816	40.4462	2.52663	132.632	473.879	407.984	154.528	196.969	393.279	0	0	845.977	0	60.0935	109.705
XLOC_047182	PREDICTED: calnexin homolog [Setaria italica]	11.4885	15.6585	5.92444	12.6589	14.3934	10.77	0	0	31.3828	39.6488	62.9862	60.3182	31.8264	12.4976	40.8527	4.28208	0	10.0125	49.0776	40.6249	49.4422
XLOC_005600	phosphoribosylamine-glycine ligase, putative [Ricinus communis] >gi|223545791|gb|EEF47295.1| phosphoribosylamine-glycine ligase, putative [Ricinus communis]	1.29779	0.604635	0.482351	0.845687	0.931578	1.01517	1.18471	0.873565	0.359319	0.254565	0.278239	0.371236	0.241052	0.15883	0.19161	0	0	0	0.107195	0	0.0195587
XLOC_067766	PREDICTED: uncharacterized protein LOC100262009 [Vitis vinifera]	4.00471	4.77166	6.3467	5.25395	4.60385	4.60419	8.65773	2.3871	3.44969	5.1478	5.46785	4.68344	4.7066	1.11753	4.34951	1.19623	0.612696	2.77929	7.65511	2.56645	4.73762
XLOC_093378	Os01g0592900 [Oryza sativa Japonica Group] >gi|53791584|dbj|BAD52706.1| DEAH helicase isoform 5-like [Oryza sativa Japonica Group] >gi|255673416|dbj|BAF05370.2| Os01g0592900 [Oryza sativa Japonica Group]	4.31623	5.87245	6.22603	4.92264	7.92082	18.0275	0	1.14999	89.8513	14.6022	7.19336	16.9001	14.2	0	1.66567	0	0	0	3.57347	5.81452	5.6148
XLOC_074795	dehydrin [Hyacinthus orientalis]	130.91	187.881	404.331	155.444	190.945	324.101	280.821	174.498	748.269	1306.37	1224.5	645.173	819.862	999.654	1389.65	2943.83	3474.94	3858.67	4571.02	389	914.451
XLOC_055921	Os06g0671700 [Oryza sativa Japonica Group] >gi|113596372|dbj|BAF20246.1| Os06g0671700, partial [Oryza sativa Japonica Group]	15.049	12.9262	16.5209	15.8979	15.7502	15.5508	19.8728	16.27	3.41615	8.8269	8.37545	10.3518	12.2808	7.75317	3.40005	7.46326	9.10076	6.56611	10.2224	1.21034	3.01567
XLOC_042884	PREDICTED: major facilitator superfamily domain-containing protein 12-like [Setaria italica]	11.7588	13.2025	15.195	12.717	12.6476	15.653	11.4961	12.9691	18.2747	22.072	20.5311	22.2135	24.5933	23.5623	20.4875	3.97349	3.49053	4.89259	43.0495	14.3698	16.363
XLOC_023711	PREDICTED: hydrophobic protein OSR8-like [Brachypodium distachyon]	100.431	72.8242	105.949	72.4103	86.689	83.0046	144.152	207.129	180.214	410.529	496.548	453.498	397.449	297.985	124.616	1359.3	1200.17	1395.74	394.428	330.372	332.412
XLOC_075405	Glutamate synthase 1 isoform 1 [Theobroma cacao]	13.301	16.3647	14.8763	8.79516	12.772	17.4276	14.9023	3.54379	28.4677	26.6875	22.9087	29.7066	23.1285	68.0395	29.2125	18.9119	18.2658	24.9748	18.984	21.3267	22.7544
XLOC_070799	PREDICTED: major facilitator superfamily domain-containing protein 5-like [Glycine max]	0.659276	0	0	0.267042	1.27277	0.320699	0	0	0	1.9787	0.6889	1.30094	1.38643	0.420235	0.595143	0	0	0	0	0	2.95793
XLOC_061260	PREDICTED: transmembrane ascorbate ferrireductase 1-like [Brachypodium distachyon]	1.75074	7.03019	2.09295	4.61662	0.000137085	2.78031	6.40332	19.3222	1.39454	2.1822	1.50307	0	2.05652	45.1005	76.0392	155.492	178.543	201.875	6.91552	9.67266	7.01232
XLOC_053774	Cytochrome P450 90D2 [Triticum urartu]	0.100577	0	0	0.192927	0.15104	0.124979	0.623078	0.229681	0	0	0	0	0	1.02713	0	0	0	0.345256	0.200705	1.5189	2.17963
XLOC_069241	PREDICTED: monothiol glutaredoxin-S15, mitochondrial-like [Fragaria vesca subsp. vesca]	42.6954	53.3406	48.9859	64.9292	62.6114	30.937	28.5618	44.604	82.5747	81.5403	329.649	207.662	145.426	68.26	34.0345	331.009	160.871	416.436	486.386	17.5864	21.3083
XLOC_057959	PREDICTED: tryptophan synthase beta chain 2, chloroplastic-like [Cucumis sativus]	9.99337	10.1202	10.44	9.26193	11.5741	10.5214	8.15323	15.7982	2.61375	7.09314	6.34094	6.03853	5.25126	8.61828	12.0044	10.1442	8.2568	10.3965	8.24513	17.3341	29.2484
XLOC_042330	predicted protein [Populus trichocarpa] >gi|222857955|gb|EEE95502.1| predicted protein [Populus trichocarpa]	7.35641	9.15363	6.01461	8.87941	9.12005	7.83594	4.98034	5.59278	8.37287	18.3533	22.1166	16.5532	16.261	22.7417	25.795	59.7096	63.2545	71.1355	14.5581	17.0339	21.3767
XLOC_001923	predicted protein [Hordeum vulgare subsp. vulgare]	57.5771	54.329	76.6283	80.8747	71.9341	50.1984	32.1206	30.5366	15.0381	15.0899	16.4389	21.1878	17.8658	21.5747	12.9428	20.3911	22.9399	32.3232	23.3867	10.0362	14.9835
XLOC_013415	PREDICTED: LOW QUALITY PROTEIN: pentatricopeptide repeat-containing protein At3g50420-like [Cicer arietinum]	0	0	0	0	0	0	2.82492	3.6266	0	0	0	0	0	0	0	0	0	0	0	1.55337	0.683569
XLOC_006385	predicted protein [Populus trichocarpa] >gi|222866596|gb|EEF03727.1| predicted protein [Populus trichocarpa]	10.1946	8.23521	6.97927	11.533	6.91597	6.4445	10.5577	3.85217	5.16643	5.16898	9.88269	7.58932	8.29976	8.036	2.93895	3.71079	3.92001	5.30765	2.23027	2.05136	2.92106
XLOC_028143	PREDICTED: uncharacterized protein LOC101786121 [Setaria italica]	0.126502	0.241512	0.138132	0.173464	0.202545	0.168828	0.160538	3.21627	0	0	0	0	0	0	0	0	0	0.672447	0.0838241	0	0.0709616
XLOC_072514	unnamed protein product [Oryza sativa Japonica Group]	1.27452	1.60229	2.17881	1.16369	3.04604	1.58737	3.37273	0.00116033	0	0	0	0	0	0	0	0	0	0	0	0	0
XLOC_061049	lectin [Epipactis helleborine]	7.11701	20.0049	23.4769	3.51486	14.2845	35.5264	544.092	1453.41	1902.51	871.067	1298.56	1683.34	2184.27	6844.07	1018.73	190.215	0	25.3199	573.558	718.055	182.159
XLOC_016213	PREDICTED: RNA-binding protein with serine-rich domain 1-like [Setaria italica]	0.556822	0.183237	1.54055	0.691513	0.368685	0.620156	5.82389	3.66063	0.0861365	0.991525	0.623798	0.59622	1.51465	0	1.31564	0	1.77363	1.07328	2.96145	0	0.871269
XLOC_064316	Chaperone protein dnaJ 13, putative, expressed [Oryza sativa Japonica Group] >gi|215694809|dbj|BAG90000.1| unnamed protein product [Oryza sativa Japonica Group]	0.159268	0.117648	0.190842	0.167493	0.255441	0.0462457	0	0	0.605408	1.82072	1.74604	1.42667	5.0492	0.763349	0.0747499	0	0	0	0.0986952	0	0
XLOC_018208	class III peroxidase [Oncidium hybrid cultivar]	19.1948	36.8947	53.4889	14.8797	19.1634	41.0656	630.372	633.253	38.9373	46.8667	27.023	36.2782	23.3417	18.8664	3.83222	5.72539	15.3593	11.95	37.3522	187.933	459.676
XLOC_081318	PREDICTED: uncharacterized protein LOC100823428 [Brachypodium distachyon]	23.2185	21.4429	25.3458	25.3363	24.5692	20.3551	10.8816	13.2603	45.1961	33.998	36.5865	37.8401	28.228	31.8282	21.6201	2.43815	3.43233	1.50382	18.4644	15.4598	18.5233
XLOC_006289	PREDICTED: putative pentatricopeptide repeat-containing protein At5g08490-like [Cicer arietinum]	12.4267	15.1138	0	39.889	45.8731	9.73943	0	5.13051	0	0	0	0	0	0	0	20.7647	20.7647	0	20.5601	21.8029	7.72891
XLOC_000890	predicted protein [Populus trichocarpa] >gi|222855223|gb|EEE92770.1| predicted protein [Populus trichocarpa]	0.60852	1.50405	0.661556	0.836499	0.587878	0.811199	2.80629	2.41457	2.73646	3.72193	2.88704	3.60243	5.25618	1.63713	3.14599	0.971335	0.965644	2.26278	2.08844	1.7416	0.692326
XLOC_087521	PREDICTED: uncharacterized protein LOC101231933, partial [Cucumis sativus]	0.298186	0.186712	1.25982	1.14713	0.458591	0.453539	20.203	15.3514	0	0.709099	0.628972	1.00049	1.1993	2.80229	11.144	0	0	0	12.4978	1.76403	6.03169
XLOC_006534	TPA: hypothetical protein ZEAMMB73_095755 [Zea mays]	6.59782	6.16247	15.1092	9.74485	11.4645	10.7464	13.4055	11.0311	1.66748	0.809812	0	0.839872	0.569301	2.97504	6.25462	4.72861	5.63531	4.94086	1.03385	3.07071	4.82223
XLOC_016843	zinc knuckle (CCHC-type) family protein [Arabidopsis lyrata subsp. lyrata] >gi|297340455|gb|EFH70872.1| zinc knuckle (CCHC-type) family protein [Arabidopsis lyrata subsp. lyrata]	70.5384	60.5282	39.2154	74.2355	39.6511	35.0576	9.80133	22.8148	69.5832	196.407	189.087	202.113	110.933	3.36439	2.74792	0	0	2.20192	17.394	16.8849	22.6376
XLOC_027165	predicted protein [Populus trichocarpa] >gi|222864136|gb|EEF01267.1| predicted protein [Populus trichocarpa]	33.4222	28.9755	23.3919	41.1834	30.6595	27.731	36.0083	22.9608	33.7411	40.3979	39.5797	40.1705	36.0706	34.9087	42.8808	23.6424	26.3234	28.4402	25.658	54.1785	73.7465
XLOC_092488	PREDICTED: uncharacterized protein LOC101297740 [Fragaria vesca subsp. vesca]	2.24329	2.65304	1.99814	1.59532	1.89747	2.15402	2.72035	3.7043	15.0147	35.2926	21.47	23.8454	25.6416	1.18595	0.385053	0.319985	0	0	0.461847	5.09649	5.12331
XLOC_037106	glycosyltransferase [Triticum aestivum]	0	0	0	0	0	0	31.9708	3.66408	0.446871	0.806147	1.06778	4.12769	15.5704	7.80675	3.03932	265.096	212.077	252.716	24.8663	18.9785	7.93806
XLOC_042391	PREDICTED: probable receptor-like protein kinase At5g18500-like isoform X1 [Setaria italica] >gi|514777170|ref|XP_004968654.1| PREDICTED: probable receptor-like protein kinase At5g18500-like isoform X2 [Setaria italica]	0.790871	2.161	1.43203	1.15234	2.55404	1.07529	1.74799	3.91087	0	0	0	0	0	0.278442	0	0	0	0	0	0	0
XLOC_063308	PREDICTED: ribonuclease Z, chloroplastic [Vitis vinifera] >gi|297739240|emb|CBI28891.3| unnamed protein product [Vitis vinifera]	3.80149	4.14921	3.99948	3.14136	4.08759	5.44885	4.25122	2.0194	0.173136	1.42701	3.22307	2.21224	2.33349	3.08038	5.62982	1.84529	1.86167	0.857545	1.42842	3.1706	4.1847
XLOC_056964	hypothetical protein OsJ_25125 [Oryza sativa Japonica Group]	40.3344	29.5564	32.5717	45.5065	41.2584	35.5776	48.9586	27.9203	31.2112	24.2803	25.5005	25.2885	17.9933	34.8036	57.1992	47.4448	55.7949	51.5664	127.303	49.3985	65.6526
XLOC_066122	PREDICTED: 60S ribosome subunit biogenesis protein NIP7 homolog [Vitis vinifera] >gi|147783622|emb|CAN68143.1| hypothetical protein VITISV_035660 [Vitis vinifera]	5.26594	5.02355	4.92468	4.61809	4.88501	3.96999	23.2283	14.6947	11.6053	13.4982	14.8689	11.6925	13.1739	11.5168	17.6306	9.88069	8.53397	16.6047	38.7519	24.1548	38.0452
XLOC_004437	PREDICTED: acyl-coenzyme A thioesterase 13-like [Brachypodium distachyon]	7.40265	9.72544	10.5357	9.08167	5.43487	9.53894	117.975	85.3504	3.55121	7.08017	7.57451	5.17795	8.80223	14.1769	30.8249	86.1233	47.2345	67.3723	31.3281	51.1047	48.4152
XLOC_047094	PREDICTED: uncharacterized transporter YBR287W-like [Cicer arietinum]	20.6784	37.7912	33.1355	27.6298	26.9451	34.5478	19.6186	65.6971	56.5563	64.1044	61.8459	62.6376	58.0119	23.8924	20.2604	2.43492	9.22143	2.5588	6.25626	28.1631	28.7918
XLOC_093750	putative regulator of chromosome condensation (RCC1) family protein [Zea mays]	3.8163	1.38854	3.91168	3.70243	2.81044	3.29654	6.65273	2.82038	5.22381	6.87392	6.01779	7.23472	6.95196	8.20047	10.6221	2.53501	0	3.86235	3.52588	1.64913	4.44968
XLOC_070498	OSIGBa0157K09-H0214G12.23 [Oryza sativa Indica Group]	25.0445	24.4194	16.4447	32.0066	27.3991	21.5353	11.8757	12.9217	9.30148	18.2202	17.9655	16.4431	15.0576	11.6653	16.5843	5.07778	3.8395	5.48877	18.0194	15.3408	18.5633
XLOC_070157	PREDICTED: vacuolar protein sorting-associated protein 35 isoform 1 [Vitis vinifera]	19.8525	21.1729	19.3693	20.0396	17.4129	18.0438	15.541	12.8158	33.6714	28.9554	28.616	27.4815	27.3351	25.868	28.7914	7.58603	6.82545	5.73163	7.31813	13.5979	13.3781
XLOC_011530	hypothetical protein VITISV_043672 [Vitis vinifera]	27.5805	27.5186	21.1606	26.7057	25.8333	25.3711	2.70575	5.04172	16.9772	10.7353	8.79206	11.5215	9.43502	2.46804	2.98763	1.13084	1.50778	1.74812	3.77218	5.9369	5.88075
XLOC_092853	PREDICTED: uncharacterized protein LOC100258531 [Vitis vinifera] >gi|297736240|emb|CBI24878.3| unnamed protein product [Vitis vinifera]	3.31246	3.32846	1.80367	4.58271	4.44714	4.05821	0.315181	2.48236	0	0.0843132	0	0	0	0.111519	0	0	0	0	0	0	0
XLOC_024470	hypothetical protein VITISV_036403 [Vitis vinifera]	0.517791	2.98395	11.4703	0.629048	0.743046	4.43999	11.6918	7.00002	3.96219	14.046	12.6552	18.1909	25.4227	158.102	213.569	1.36479	5.09514	4.99158	9.07177	5.03451	5.33439
XLOC_075286	PREDICTED: E3 ubiquitin-protein ligase PUB23-like [Fragaria vesca subsp. vesca]	0.130722	0.247828	0.564585	0.219811	0.260929	0.260153	2.74783	0.869021	0	0	0	0	0	0	0	0	0	0	0	0	0
XLOC_034395	mitochondrial import inner membrane translocase subunit TIM16 [Zea mays] >gi|195657839|gb|ACG48387.1| mitochondrial import inner membrane translocase subunit TIM16 [Zea mays] >gi|238013110|gb|ACR37590.1| unknown [Zea mays] >gi|414871049|tpg|DAA49606.1| TPA: import inner membrane translocase subunit ...	38.8734	37.6075	34.7483	27.6359	40.7404	34.5527	73.1026	52.6395	50.8206	46.6237	50.2282	52.768	45.9036	66.4606	76.2462	56.6877	97.1118	70.0425	61.0004	41.9412	42.5752
XLOC_021731	SET domain-containing protein [Medicago truncatula] >gi|355497382|gb|AES78585.1| SET domain-containing protein [Medicago truncatula]	0	0	0	7.9326	0	0	0	0	12.1586	5.21077	21.5722	19.6115	0	0	0	0	0	0	2.83114	1.40507	2.76249
XLOC_032304	PREDICTED: F-box protein At2g16365-like [Vitis vinifera]	13.3969	10.5223	15.7396	15.1153	10.3137	13.9799	16.6189	17.6454	0	0	0	0	0	0.168153	0	0	0	0	2.08243	0.28358	0.0634814
XLOC_008503	hypothetical protein OsI_08951 [Oryza sativa Indica Group]	6.45384	7.22644	7.64941	6.08092	5.74691	7.13989	9.37771	5.23652	0.430877	1.59898	2.09326	1.65856	2.34249	7.97971	7.59687	3.13725	3.13725	2.42602	2.81003	2.7146	3.57209
XLOC_002925	PREDICTED: E3 ubiquitin-protein ligase MARCH2-like [Setaria italica]	8.17409	9.67921	8.97959	6.3719	8.60657	9.13771	22.3045	9.26446	18.0796	10.6291	17.2794	17.9125	18.6554	4.55012	3.74306	18.2866	20.494	22.4444	23.3151	16.7187	22.3542
XLOC_028758	hypothetical protein OsJ_19218 [Oryza sativa Japonica Group]	2.13517	0.574971	0	1.03753	1.3623	1.40075	4.6037	0.567915	0	1.02222	2.38432	1.61032	0.906299	0	1.65831	28.3365	26.8037	20.0386	3.29991	2.6849	1.75183
XLOC_091292	cellulose synthase [Phyllostachys edulis]	4.24999	5.80531	2.53512	6.56858	5.38396	4.29339	8.88141	0.947597	1.41914	6.1332	5.00653	5.35391	2.94527	3.65304	1.05607	2.29059	0	3.43127	0.741992	7.81679	4.20977
XLOC_060281	poly(A) polymerase, putative [Ricinus communis] >gi|223541574|gb|EEF43123.1| poly(A) polymerase, putative [Ricinus communis]	4.65618	4.64489	5.11668	4.98227	4.12987	3.76007	3.47372	5.62547	6.54237	7.73783	6.77781	6.51267	7.71219	10.6801	14.2953	6.54057	5.0504	6.2882	5.54413	9.11578	8.08318
XLOC_005304	Heat stress transcription factor A-5 [Medicago truncatula] >gi|355486708|gb|AES67911.1| Heat stress transcription factor A-5 [Medicago truncatula]	0.841783	0.570834	2.8955	1.0106	0.762276	0.770231	2.56693	0	0	0.648981	0.31457	0.193904	0.553129	0.555496	0.328013	0	0	0	2.16451	1.67772	1.22625
XLOC_044257	P-loop containing nucleoside triphosphate hydrolases superfamily protein isoform 2, partial [Theobroma cacao]	12.7318	10.3703	6.5876	14.0968	10.1341	8.8789	1.23524	8.01743	9.57285	5.34605	5.38195	3.86	2.83163	0.0820571	0.121025	1.92931	0.682935	1.3643	0.756845	6.78762	5.82164
XLOC_003277	RecName: Full=DNA-directed RNA polymerase subunit beta'; AltName: Full=PEP; AltName: Full=Plastid-encoded RNA polymerase subunit beta'; Short=RNA polymerase subunit beta' >gi|5457428|emb|CAB48413.1| RNA polymerase A beta prime subunit [Sinapis alba]	902.925	624.064	884.723	1978.52	334.312	505.505	0	45.0488	0	55.16	0	33.3765	0	47.8317	102.922	150.023	550.083	11682.6	103.118	17.5026	61.27
XLOC_077482	predicted protein [Populus trichocarpa] >gi|222852149|gb|EEE89696.1| predicted protein [Populus trichocarpa]	57.5711	104.798	159.836	127.05	63.3594	66.6202	205.475	57.0964	0	0	0	0	0	0	0	0	0	0	0	0	0
XLOC_051206	PREDICTED: uncharacterized protein LOC101501470 isoform X1 [Cicer arietinum] >gi|502112735|ref|XP_004494427.1| PREDICTED: uncharacterized protein LOC101501470 isoform X2 [Cicer arietinum]	2.12952	0.888321	1.65001	2.03777	1.45844	0.810126	0.437425	1.19961	0	0.343588	0.904997	1.60555	0.601579	0	0.302493	0	0	0	0	0	0
XLOC_068802	putative pollen-specific kinase [Phyllostachys edulis]	17.4792	20.7544	23.947	18.0148	16.9221	16.0434	10.9696	12.073	1.97687	4.24411	2.92975	1.43486	2.95887	3.0188	2.08659	22.4558	21.6494	19.7448	4.39837	7.81836	6.85027
XLOC_076084	PREDICTED: uncharacterized protein LOC100264206 [Vitis vinifera] >gi|296084617|emb|CBI25667.3| unnamed protein product [Vitis vinifera]	15.6149	12.5021	11.2847	14.7938	13.5947	12.041	9.3621	10.8118	11.7542	10.8577	13.0823	14.3619	13.7428	11.5405	17.888	11.8656	16.3037	9.0506	19.48	17.1748	23.3079
XLOC_063611	Uncharacterized protein isoform 2 [Theobroma cacao]	13.9116	13.2568	8.70605	13.4871	13.5198	11.3985	2.43257	2.29575	1.16985	2.97316	3.51034	3.72803	3.98736	2.46796	1.6811	1.41117	2.96536	0	4.48929	3.88425	3.42005
XLOC_044872	PREDICTED: E3 ubiquitin-protein ligase At4g11680-like [Solanum lycopersicum]	14.7171	11.3668	11.9287	18.2695	11.4774	16.0132	6.99377	6.13406	0.954142	2.16318	1.62906	3.00796	1.31514	4.13073	4.07776	2.00393	1.9247	1.30421	5.27434	4.40654	8.36223
XLOC_057658	Retinoblastoma-related 1 [Theobroma cacao]	6.02722	5.70015	6.25395	5.33357	5.35483	5.43873	1.70716	1.00428	0	0.369798	0	0	0	0	0	0	0	0	0	0	0
XLOC_015394	Plant heme oxygenase family protein isoform 3 [Theobroma cacao]	16.5588	27.683	31.4576	19.0991	22.3993	24.0558	67.4804	48.0929	0	3.63518	4.10615	2.3624	3.6929	29.4717	13.1632	0	0	0	0	0	0
XLOC_073014	PREDICTED: heat stress transcription factor B-2b [Vitis vinifera]	1.54669	1.63037	4.13127	1.7012	1.75704	1.54675	3.33393	4.56636	0.852229	0.947106	0.692076	0.549795	0.98246	10.3732	15.618	5.60259	4.93297	4.15274	11.3363	5.10908	6.96179
XLOC_050018	PREDICTED: ABC transporter G family member 24-like [Fragaria vesca subsp. vesca]	0	0	0	0	0	0	2.61885	2.83353	1.70863	8.61032	20.1354	22.6493	16.4998	5.50648	0	19.319	6.43966	4.89431	8.20834	16.9041	15.327
XLOC_018007	unknown [Medicago truncatula]	8.0481	0	9.57753	8.07627	6.48796	16.8187	0	0	5.15742	30.2675	9.26185	34.8318	29.7983	0	0	161.96	166.557	266.268	54.9652	22.7407	25.2966
XLOC_015084	myc-like anthocyanin regulatory protein [Cornus canadensis]	0	0	0.426188	0.117373	0	0	2.41459	1.09308	0.768788	2.34512	2.41695	2.20127	2.54667	4.00921	1.25647	3.35805	1.60552	2.3869	1.6702	2.95136	2.694
XLOC_039833	PREDICTED: 50S ribosomal protein L3-2, chloroplastic-like isoform X1 [Cicer arietinum] >gi|502099931|ref|XP_004491594.1| PREDICTED: 50S ribosomal protein L3-2, chloroplastic-like isoform X2 [Cicer arietinum]	33.958	32.334	24.1208	39.0979	33.6177	30.8758	23.6721	30.4973	12.2602	21.1894	21.2433	20.5368	16.3724	15.351	23.1912	22.0858	18.1329	21.2533	15.2993	12.1039	17.5363
XLOC_073710	hypothetical protein ZEAMMB73_189474, partial [Zea mays]	5.71343	4.00383	3.91539	4.6781	7.34441	7.1265	3.55198	5.71625	3.20062	3.71834	2.31266	3.09376	2.87254	0	0	8.31277	2.77087	7.37289	10.7738	14.7895	15.0493
XLOC_014533	PREDICTED: squamosa promoter-binding-like protein 8-like [Brachypodium distachyon]	3.12428	0.755996	1.33511	3.87516	1.74379	0.772003	0.102238	0.0606826	0.376279	0.0495909	0	0.0465548	0	0	0	0	0	0	0.772273	1.07313	0.871468
XLOC_093116	predicted protein [Hordeum vulgare subsp. vulgare]	11.9373	9.33104	9.03206	10.6125	10.2494	8.52575	7.54204	5.44273	6.51564	9.38638	9.28758	13.3696	8.8849	12.849	8.97022	2.29477	1.52947	3.79778	5.56459	8.2006	8.50267
XLOC_090907	1-aminocyclopropane-1-carboxylate synthase [Cattleya bicolor]	0	3.62182	4.79603	0	0	2.54983	0	0	0	92.7549	168.117	0	2.88911	0	0	0	0	0	0	0	0
XLOC_018369	3-ketoacyl-CoA synthase [Eranthis hyemalis]	1.61807	1.15888	1.54768	2.43458	1.32214	1.1621	5.11322	10.0625	1.43309	2.01634	2.1088	2.20746	1.99837	3.42442	7.43411	15.5505	23.8778	25.3542	13.0324	7.63508	5.24604
XLOC_039679	predicted protein [Physcomitrella patens subsp. patens] >gi|162668246|gb|EDQ54857.1| predicted protein [Physcomitrella patens subsp. patens]	1.75932	1.87287	2.83082	2.07002	1.77345	1.65155	0.292529	1.04754	1.11504	2.44428	1.63231	1.60562	1.41516	1.59104	7.09e-05	0	0	1.24763	3.34987	1.87489	2.15484
XLOC_082248	predicted protein [Populus trichocarpa] >gi|222868268|gb|EEF05399.1| predicted protein [Populus trichocarpa]	3.34461	4.0023	3.29852	5.13707	5.373	3.31873	3.43052	8.54781	5.80213	2.44976	4.34154	5.36272	3.3378	3.60452	2.58311	1.03246	2.47853	1.80826	2.68191	4.80713	4.88982
XLOC_079446	predicted protein [Hordeum vulgare subsp. vulgare]	19.6253	19.2915	22.3577	22.0767	19.5585	20.4635	15.3311	14.3835	8.02033	18.7835	19.0753	20.3075	20.0629	16.6012	20.4947	1.62394	0.902141	1.12364	8.13522	11.1678	17.1286
XLOC_032808	hypothetical protein SORBIDRAFT_10g010640 [Sorghum bicolor] >gi|241916478|gb|EER89622.1| hypothetical protein SORBIDRAFT_10g010640 [Sorghum bicolor]	0.260473	0.246902	1.33585	0.262775	0.363941	1.03673	7.40696	6.38002	0	0	0	0	0	0.313402	0	0.465558	0.465558	0.718637	1.07605	7.90285	9.7643
XLOC_076030	MUTS [Theobroma cacao]	10.6047	7.17772	5.22158	15.8685	10.8972	6.40991	2.50531	2.98768	0	0	0	0	0	0	0	0	0	0	0	0	0
XLOC_029295	hypothetical protein OsI_05819 [Oryza sativa Indica Group]	0	0	0	0	0	0	0.322511	1.00954	0	0	0.420759	0	0	0.389113	0	0	0	0	0	0.118247	0.0612689
XLOC_091312	unknown [Picea sitchensis]	0	12.6595	0	0	0	0	0	0	0	18.4651	63.8168	46.3232	70.7843	0	0	19.0046	0	0	0	13.3032	0
XLOC_051015	Os08g0152600 [Oryza sativa Japonica Group] >gi|37806244|dbj|BAC99761.1| unknown protein [Oryza sativa Japonica Group] >gi|113622974|dbj|BAF22919.1| Os08g0152600 [Oryza sativa Japonica Group] >gi|215687065|dbj|BAG90911.1| unnamed protein product [Oryza sativa Japonica Group]	3.06963	3.67023	5.63781	2.136	2.9067	1.48719	6.09054	0.714873	7.16972	6.66518	2.67501	9.94602	8.17638	3.84246	4.43051	0	29.2992	0	3.4869	2.94796	1.93624
XLOC_078156	PREDICTED: protein cereblon-like [Solanum lycopersicum]	0	0	0	0	0	0	126.35	3.96954	46.0446	31.1603	63.6592	55.1342	48.7441	18.1584	27.1514	0	0	0	34.1184	39.5104	9.56909
XLOC_080932	PREDICTED: uncharacterized protein LOC100246973 [Vitis vinifera]	4.47551	6.02988	6.97839	6.0837	7.62416	7.21388	3.53187	13.9068	0.113788	5.25823	6.66345	3.35731	5.62201	4.72141	6.96587	36.0374	31.5945	50.5212	16.24	11.5772	14.7023
XLOC_051369	Mavicyanin, putative [Ricinus communis] >gi|223535015|gb|EEF36698.1| Mavicyanin, putative [Ricinus communis]	0	0	0	0	0	0.0942114	0	0.771735	0	0	0	0	0	0	0	0	0	0	0	0	0
XLOC_020826	PREDICTED: apurinic endonuclease-redox protein-like isoform X2 [Cicer arietinum]	3.68699	3.10745	3.51347	3.68587	3.70093	2.28807	1.91385	1.92432	7.85125	7.84457	7.28056	7.04244	6.7968	1.7586	2.04808	0	0.86208	0.851827	1.59064	4.73087	3.42796
XLOC_014223	hypothetical protein OsJ_33510 [Oryza sativa Japonica Group]	5.65124	5.99247	5.0864	9.7334	7.21867	6.72845	3.77622	4.52476	5.16938	4.94367	5.26925	6.67189	6.32328	0.844139	2.27245	0	1.6117	1.47096	0.431335	0.423645	1.03395
XLOC_052681	predicted protein [Populus trichocarpa] >gi|222852927|gb|EEE90474.1| predicted protein [Populus trichocarpa]	3.06353	3.0909	0.472088	2.80701	2.26072	1.85719	4.82852	2.03638	9.3355	4.6169	5.41478	8.69403	4.17785	10.271	5.5855	0	2.50495	0	5.55356	0.575233	0.520197
XLOC_056316	AP2 domain containing protein [Zea mays] >gi|195610482|gb|ACG27071.1| AP2 domain containing protein [Zea mays]	0	0.990064	0	0	0.209854	0.699789	0.833995	1.58479	0	0	0.1527	0	0	30.4841	44.1099	55.0101	78.6584	59.8342	36.6502	4.39992	4.16616
XLOC_012309	hypothetical protein ZEAMMB73_340618 [Zea mays]	6.43132	5.443	3.76005	3.85348	5.65161	5.20679	0.944262	0.522482	12.4877	4.62595	3.24924	3.87871	4.47203	0.989581	1.82414	0	0	0	3.00994	0.361749	0.676677
XLOC_074650	Os04g0551800 [Oryza sativa Japonica Group] >gi|38345468|emb|CAE01686.2| OSJNBa0010H02.6 [Oryza sativa Japonica Group] >gi|113565071|dbj|BAF15414.1| Os04g0551800 [Oryza sativa Japonica Group] >gi|215768326|dbj|BAH00555.1| unnamed protein product [Oryza sativa Japonica Group] >gi|222629326|gb|EEE61458...	48.5894	36.3173	45.7264	53.7936	35.3469	26.1429	12.1604	16.8413	31.7379	47.0879	48.7142	42.5841	36.8008	30.9836	37.6864	7.67029	8.08889	6.44869	20.6807	29.2341	36.8576
XLOC_063103	PREDICTED: uncharacterized protein LOC100827065 [Brachypodium distachyon]	0.766062	0.730886	0.618166	0.254481	1.50717	0.908686	0	1.42949	0	0.36708	2.54512	0.958662	0.665278	8.02893	1.95025	0	17.5262	0	2.7575	4.60331	5.62553
XLOC_026452	PREDICTED: G-type lectin S-receptor-like serine/threonine-protein kinase B120-like [Vitis vinifera]	2.03083	1.89604	3.17652	2.84872	2.56796	2.50199	3.0614	3.30473	1.12631	0.913894	0.958752	0.764272	0.815237	3.82563	2.23063	9.06665	10.5941	10.0594	2.02311	2.47427	2.52845
XLOC_035170	unknown [Picea sitchensis]	54.1379	30.523	30.7787	51.6826	34.4146	32.547	36.6219	33.9828	29.4258	36.7808	35.0408	48.63	33.7719	106.754	56.6208	40.3111	43.0732	37.9671	22.552	40.8732	44.4828
XLOC_013531	predicted protein [Populus trichocarpa] >gi|222843253|gb|EEE80800.1| predicted protein [Populus trichocarpa]	2.9719	3.64203	3.84126	6.8794	4.7337	3.12107	5.31804	6.4681	3.4341	5.64932	7.09088	5.25848	6.30198	5.05734	9.90243	25.8234	22.8482	21.7807	5.4616	9.86159	11.1292
XLOC_006551	LOC100283786 precursor [Zea mays] >gi|195637204|gb|ACG38070.1| copper chaperone for superoxide dismutase [Zea mays]	0	0.222443	0	0	0	0	8.25829	5.21961	1.04513	0.138616	0.43238	0.27797	0.123567	1.17679	1.39631	3.03861	3.03861	6.91503	9.19313	0.265878	0.179753
XLOC_083616	PREDICTED: putative metallophosphoesterase At3g03305-like [Setaria italica]	2.03721	1.26464	2.09205	2.21076	1.60426	2.20942	0.871235	1.22273	1.07965	0.967228	1.4856	1.64577	1.49143	0.953549	1.25271	0.31842	0.624336	0.234799	1.98982	0.746979	1.24003
XLOC_035233	copalyl diphosphate synthase [Taiwania cryptomerioides]	1.11437	4.49002	2.88982	4.16335	3.56616	0	295.377	34.6595	0	0	0	0	0	0	0	0	0	0	0	0	0
XLOC_089588	unknown [Glycine max]	893.675	439.787	1405.81	1885.29	1406.61	1412.31	0	0	0	0	0	0	0	0	0	0	0	0	0	0	0
XLOC_042688	hypothetical protein PRUPE_ppa007204mg [Prunus persica]	1.4009	2.27753	2.80103	3.00666	2.03469	2.20548	1.55166	2.17755	0.0968326	0	0	0	0.327583	0	1.31651	2.2349	0	0.531822	1.08454	0.28707	0
XLOC_022316	putative homeodomain-like transcription factor superfamily protein [Zea mays]	9.4528	10.2009	9.36655	13.8073	12.665	9.41527	7.80962	9.45429	15.4638	14.2799	14.4664	14.0875	14.6749	7.41013	6.39089	9.70062	11.9803	11.2179	5.63752	7.65273	7.26686
XLOC_059613	Cytochrome P450, family 71, subfamily A, polypeptide 25, putative [Theobroma cacao]	15.1165	21.3965	33.5742	18.1983	18.1328	22.6258	5.92474	8.65311	2.39e-06	0.087302	0.557394	0.440058	0.216776	0.454987	0.493611	2.691	0.870615	2.49018	10.8294	24.2755	24.1331
XLOC_049846	PREDICTED: reticuline oxidase-like protein-like [Vitis vinifera]	0.288873	0.177821	0.197368	0.303474	0.240092	0.159946	0.930593	0.739452	0.900187	0.352352	0.441427	0.15062	0.37978	1.89666	0.441334	2.05693	1.61754	3.43234	0.436045	0.784531	1.70617
XLOC_036369	RING/FYVE/PHD-type zinc finger family protein isoform 1 [Theobroma cacao]	4.04989	5.54077	4.97154	3.51374	17.3223	3.7975	12.637	16.6326	206.592	126.337	343.33	270.953	162.754	16.9113	21.603	1.45165	1.48961	260.438	5.98522	61.4538	4.54502
XLOC_032634	multisubunit regulator protein COP9 [Hyacinthus orientalis]	0	0	0.614651	6.48041	27.725	0.258373	0	0	0	5.0415	1.32783	4.44288	0	32.2555	32.1237	158.469	60.6009	0	82.744	4.51415	3.60099
XLOC_076940	PREDICTED: uncharacterized protein LOC101785548 [Setaria italica]	15.5748	16.3228	11.4085	14.086	11.1343	15.0885	12.0266	7.84541	7.88507	10.2793	9.07368	10.4414	11.103	8.41969	17.0166	0	2.55528	8.16987	1.93267	1.3254	4.77191
XLOC_005958	hypothetical protein OsJ_00386 [Oryza sativa Japonica Group]	0	0	0	0	0	0	0	2.17233	9.46472	51.7537	23.5577	74.6877	0	7.26453	16.4846	0	0	0	2.53379	0	0
XLOC_057191	hypothetical protein VITISV_000145 [Vitis vinifera]	6.834	5.35218	3.12673	7.51461	4.16557	2.96515	0.0966863	0	0.6019	0.426387	0.357299	0.163513	0.198164	0	0	0	0	0	0.0849246	0	0.0290088
XLOC_086277	Xin actin-binding repeat-containing protein 1, putative [Theobroma cacao]	16.0128	16.2742	9.6076	18.2125	15.5062	11.3465	7.38936	17.2412	20.7955	15.6668	16.4754	12.0574	10.4254	2.69814	7.6213	14.8943	18.0469	19.6883	16.1311	37.0862	37.9946
XLOC_058737	unnamed protein product [Vitis vinifera]	7.17094	5.72884	2.67346	4.55555	4.63455	3.62532	0	0	2.45745	2.97441	1.70808	1.75292	1.17832	5.15079	2.87969	0	0	0	7.42328	3.40357	4.49999
XLOC_047864	hypothetical protein PRUPE_ppa004118mg [Prunus persica]	13.6289	10.834	10.8602	12.4441	9.81306	6.95243	1.11518	3.48102	13.2799	7.94908	8.41301	9.08358	3.18118	4.26182	2.8438	0	0	8.39567	15.0613	6.77539	2.41628
XLOC_040318	hypothetical protein SELMODRAFT_36560 [Selaginella moellendorffii] >gi|302788045|ref|XP_002975792.1| hypothetical protein SELMODRAFT_36559 [Selaginella moellendorffii] >gi|300156793|gb|EFJ23421.1| hypothetical protein SELMODRAFT_36559 [Selaginella moellendorffii] >gi|300158781|gb|EFJ25403.1| hypothe...	1.21822	0.711192	0.492366	0.961154	0.903146	0.347065	5.11842	6.77825	21.9145	21.8292	21.9067	17.3261	17.1943	0.788589	1.55812	55.8126	50.6122	58.5881	10.1786	3.46073	1.78241
XLOC_081464	PREDICTED: DNA-binding protein BIN4-like isoform X2 [Setaria italica]	12.0724	16.0664	11.9221	13.7526	15.3705	14.5306	13.8523	9.52772	20.8915	13.1264	14.2343	17.4648	10.0915	6.43963	8.73823	0	5.01968	0	1.00691	0.10659	3.12633
XLOC_059438	hypothetical protein ZEAMMB73_800087, partial [Zea mays]	2.53092	2.97622	1.73676	2.33256	3.16073	2.44547	0	0.389901	0	0.435739	0.551823	0.0588547	0.178224	5.53e-05	0	0	0.966606	0.737681	0.665543	1.53795	1.14983
XLOC_026907	hypothetical protein PRUPE_ppa006316mg [Prunus persica]	2.75525	2.59846	4.27061	3.03413	2.80448	2.5823	3.73699	3.46675	3.34504	3.57	4.66391	5.24479	4.47158	2.71498	1.99708	11.0854	3.29633	9.51239	1.66664	5.50444	5.86121
XLOC_062894	unknown [Medicago truncatula]	48.5221	43.1269	34.049	43.4129	42.1141	36.723	29.8735	8.30719	1.59303	0.743866	0.617721	0.441393	0.132357	0.821838	0	0	0	0	78.1402	0	0.061597
XLOC_005030	Os07g0100800 [Oryza sativa Japonica Group] >gi|255677436|dbj|BAF20587.2| Os07g0100800, partial [Oryza sativa Japonica Group]	13.9122	17.393	28.4154	14.3959	14.0565	21.9002	8.9314	6.62874	20.2695	23.5986	21.5872	21.0333	20.0342	47.6111	41.1768	2.75652	2.74504	1.12263	24.7564	4.22663	6.6572
XLOC_076508	PREDICTED: protein FAR1-RELATED SEQUENCE 5-like isoform X1 [Setaria italica] >gi|514766324|ref|XP_004965970.1| PREDICTED: protein FAR1-RELATED SEQUENCE 5-like isoform X2 [Setaria italica]	12.2511	10.5576	9.76143	10.905	10.1523	7.9795	2.33574	1.57931	0	0.0546565	0	0	0	0	0	0	0	0	3.27956	0	0
XLOC_088066	Delta-aminolevulinic acid dehydratase, chloroplastic [Triticum urartu]	66.4685	88.1685	96.4299	66.9705	73.8561	99.9491	191.718	74.5676	15.9367	41.4928	53.5847	60.2449	75.9041	142.192	476.425	54.7784	72.523	48.8599	70.9439	47.3856	78.8849
XLOC_048238	polyubiquitin [Volvox carteri f. nagariensis] >gi|300257624|gb|EFJ41870.1| polyubiquitin [Volvox carteri f. nagariensis]	10.3429	2.66948	2.60789	11.5888	4.01745	4.33161	0	0	0	0.595096	1.27985	0.625412	1.32732	0	0	0	0	0	0	0	0
XLOC_068430	putative 3-isopropylmalate dehydrogenase [Oryza sativa Japonica Group] >gi|108710173|gb|ABF97968.1| 3-isopropylmalate dehydrogenase 2, chloroplast precursor, putative, expressed [Oryza sativa Japonica Group]	7.7411	7.43469	5.70837	7.37032	5.63114	7.02699	11.4472	6.93815	6.43859	4.3289	4.58692	3.64767	2.42808	9.6637	10.7472	5.55303	10.3245	8.86731	4.85582	2.24605	8.68514
XLOC_047704	PREDICTED: SOSS complex subunit B homolog [Fragaria vesca subsp. vesca]	0	0	0	0	0	0	8.97277	5.10299	0	0.150492	0	0	0	0	0	0	0	0	0	0	0.127567
XLOC_009478	hypothetical protein OsJ_24746 [Oryza sativa Japonica Group]	1.53756	6.08999	7.39059	0	1.63633	3.49467	5.1942	0.565168	0	0	0	0	0	0	0	0	0	0	0	0	0
XLOC_088572	ATP binding cassette subfamily B4 isoform 1 [Theobroma cacao]	1.04492	0.763754	2.47575	0.807483	0.633157	1.28449	4.78257	2.82093	14.621	10.0419	9.87974	14.0208	10.5555	3.06352	1.14093	4.67766	5.8329	0	13.249	11.727	13.1673
XLOC_091333	PREDICTED: uncharacterized protein LOC101308505 [Fragaria vesca subsp. vesca]	4.27658	2.03936	0.259062	3.81871	3.1373	0.47527	1.95335	2.04539	7.34769	1.29997	0.420722	0.403438	0.365855	0.0971309	0	0	0.826864	0	1.9673	7.81386	12.2321
XLOC_054211	PREDICTED: uncharacterized protein LOC100841322 [Brachypodium distachyon]	0	0	0	0	0	0	60.778	33.2142	1.8279	8.59015	6.47847	5.73082	0	0	0	7.00791	7.00791	0	0	1.22638	0
XLOC_035861	PREDICTED: uncharacterized protein LOC100789512 [Glycine max]	52.4359	61.6811	36.3566	60.3563	41.7283	59.1986	38.217	14.985	0	0	0	0	0	0	0	0	0	0	0	0	0
XLOC_058364	PREDICTED: uncharacterized protein LOC100835807 [Brachypodium distachyon]	0	0	0	0	0	0	0	0	0.494485	0.604928	1.48552	3.26243	1.56339	0.0859103	0.112913	2.21893	0	2.27315	0.0698951	0	0.0300825
XLOC_002317	Kinesin-like calmodulin-binding protein-like protein [Triticum urartu]	1.90699	3.55675	1.73209	1.34583	1.23901	2.00948	0.449399	0.44268	11.9522	3.73357	1.56687	1.47752	5.7251	0	0.661792	0	0	0	0.326874	0.66872	0.358198
XLOC_035044	PREDICTED: probable polygalacturonase At1g80170-like [Vitis vinifera]	1.10882	0.500403	0.627635	1.55941	1.23279	1.86933	0	0.0690465	0.334502	2.72067	1.86988	4.57131	4.05447	0	0	0	0	0	1.6266	0.223482	0.0992158
XLOC_003826	unknown [Lotus japonicus]	21.0494	23.2203	16.2942	19.9129	21.7253	21.6512	7.27789	15.4292	15.7773	22.2304	16.1329	14.4215	19.4238	13.061	23.5468	18.4654	12.4319	12.9953	16.8083	22.4511	30.1504
XLOC_009271	PREDICTED: U-box domain-containing protein 4-like [Setaria italica]	2.92496	3.25801	3.17558	2.57175	3.78593	3.22206	7.45174	3.2756	0	8.22714	11.9986	9.39567	10.9285	9.07195	4.63333	8.12364	2.66779	13.639	4.52405	3.57828	2.11336
XLOC_028372	hypothetical protein OsI_27535 [Oryza sativa Indica Group]	2.14564	2.74443	3.17649	1.06933	2.27635	3.41343	0	0	4.35777	14.1753	6.14769	12.8762	17.4608	0	0	10.6546	4.1942	10.6788	35.9905	0.906957	3.12361
XLOC_000457	PREDICTED: PTI1-like tyrosine-protein kinase At3g15890-like [Fragaria vesca subsp. vesca]	0	0	0	0	0	0	17.9968	8.44338	0	0	0	1.43785	0	0	0	0	0	0	0	0	0
XLOC_047124	PREDICTED: serine/threonine-protein kinase AtPK2/AtPK19-like [Setaria italica]	0.446722	0.142111	0.319669	0.212898	0.536432	0.344928	0	0	0	0.207138	0.170294	0.163769	0.109726	0	0	0	0	0	0	0	0
XLOC_026879	single-stranded DNA-binding replication protein A [Hyacinthus orientalis]	0	0	0	0	0	0	0	0	0	0	0	0	0	0	0	0	0	0	0	0	16.6014
XLOC_033930	PREDICTED: uncharacterized protein LOC100264154 [Vitis vinifera]	2.39959	1.66311	3.89041	1.55685	1.97534	1.72516	5.35705	3.16365	1.25619	0.810504	0.443099	0.148912	0.646715	3.91e-05	1.45151	0	0	0	1.83509	1.1685	0.509533
XLOC_002879	hypothetical protein OsI_03624 [Oryza sativa Indica Group]	7.42113	5.92692	6.91998	10.1958	10.0792	13.4713	1.14858	2.5485	0	2.33674	1.93846	1.3488	0.926332	2.1899	1.88617	0	0	0	0.806315	0	0
XLOC_029241	PREDICTED: calmodulin-binding transcription activator 4-like [Brachypodium distachyon]	2.63241	2.23646	2.55855	3.08787	1.94859	2.19317	9.82445	3.81947	10.7892	18.2332	19.8711	19.952	20.3821	34.0339	17.3691	0.551918	1.66309	0.839283	3.65635	6.47259	6.95313
XLOC_012845	PREDICTED: folylpolyglutamate synthase, mitochondrial [Vitis vinifera]	2.7738	4.19909	2.68745	2.96754	2.97372	3.45576	12.174	7.6418	0	0.201056	1.07236	0.943736	0.453231	2.84993	0	0	0	0	0.0731832	0	0.054767
XLOC_014553	Plasma membrane ATPase 4 isoform 1 [Theobroma cacao]	4.13099	3.82583	4.79742	4.22575	2.17868	6.08547	8.58133	14.2631	23.8519	38.8958	32.115	52.5515	41.9735	28.1144	20.5406	3.36944	5.31277	3.94102	15.7835	14.9092	23.6204
XLOC_001383	auxin-regulated protein [Cucumis melo subsp. melo]	3.74441	5.35363	8.61967	4.22484	3.77989	6.32294	21.7581	12.2388	10.5685	6.69825	16.0504	11.1036	8.82307	9.28217	7.69707	38.1467	25.9221	40.1721	47.4273	19.0556	29.4467
XLOC_046450	Alcohol dehydrogenase-like protein 7 [Aegilops tauschii]	0.212584	0	0	0.508169	0	0.738175	14.0081	7.89741	0	0	0	0	0	0	0	0	0	0	3.0178	34.9447	21.2679
XLOC_043980	sucrose synthase 1 [Oncidium hybrid cultivar]	110.032	75.8713	83.5111	103.974	70.2919	118.685	36.2199	7.0264	101.808	147.273	118.089	216.855	139.277	167.004	69.1102	13.4568	13.0842	15.5951	147.356	47.6414	70.2654
XLOC_091805	glucan endo-1,3-beta-glucosidase 6 precursor [Zea mays] >gi|195643796|gb|ACG41366.1| glucan endo-1,3-beta-glucosidase 6 precursor [Zea mays] >gi|413935554|gb|AFW70105.1| putative O-Glycosyl hydrolase superfamily protein [Zea mays]	0.0909476	0.238537	0.0847539	0.040238	0.14694	0	1.10652	0.613966	6.3237	0.522509	0.740885	0.420636	0.78011	0.799782	1.31947	1.2023	0	0	0.0514237	3.75327	0.309062
XLOC_030321	Vacuolar protein sorting 45 [Theobroma cacao]	15.5627	13.1068	8.51322	19.3906	12.4971	12.366	7.19221	6.36222	10.6546	10.092	10.6286	12.5362	16.7094	5.38796	12.8759	9.8523	10.3156	7.51858	8.31308	7.99884	9.16935
XLOC_011857	predicted protein [Populus trichocarpa] >gi|222871651|gb|EEF08782.1| predicted protein [Populus trichocarpa]	2.18227	2.30809	2.6515	3.47397	3.14343	3.22401	2.85613	2.19829	0	0.744572	0.871408	0.737472	0.741724	1.61546	1.98944	2.78353	0.700523	1.59783	3.0103	1.34977	2.1965
XLOC_080938	unknown [Picea sitchensis]	30.6769	21.4492	27.9949	25.5491	22.3467	20.4266	5.01447	7.02747	0.704489	14.0664	13.5744	10.9434	7.23463	10.3989	8.62898	0.671169	6.05581	0	16.0896	14.9174	13.7219
XLOC_031590	PREDICTED: uncharacterized protein LOC100267324 [Vitis vinifera] >gi|297736633|emb|CBI25504.3| unnamed protein product [Vitis vinifera]	27.2076	42.0667	42.8763	33.3341	36.1226	36.6208	49.4879	25.5387	14.2619	8.63292	7.28399	8.1945	12.3595	98.4723	92.1787	14.6907	15.4788	11.34	2.80772	19.102	10.1384
XLOC_037000	PREDICTED: uncharacterized protein LOC100845800 [Brachypodium distachyon]	0.888493	0.942587	2.03581	0.390748	0.113107	0.469592	7.58995	4.52798	0	0	0	0.0842446	0	0.109826	0	0	0	0	0	0	0
XLOC_079904	hypothetical protein SORBIDRAFT_04g019020 [Sorghum bicolor] >gi|241933653|gb|EES06798.1| hypothetical protein SORBIDRAFT_04g019020 [Sorghum bicolor]	56.8828	31.2913	29.0938	39.4426	34.6595	34.1393	40.1384	130.076	67.872	33.3298	33.7014	29.2441	22.9624	8.17586	14.4014	18.8647	17.8865	34.1079	21.4257	110.482	150.371
XLOC_092751	protein kinase [Craterostigma plantagineum]	8.14126	6.96623	4.88268	7.88797	6.08643	6.5191	7.17925	12.2851	9.04081	27.7724	39.7065	42.5698	31.5131	4.41592	0.642858	0	1.07267	1.797	4.16682	6.65036	6.12404
XLOC_051008	PREDICTED: structural maintenance of chromosomes protein 1A-like [Vitis vinifera]	5.80233	19.9662	20.1269	11.1354	18.2368	17.641	0	0	0	0	0	0	0	0	0	0	0	0	0	0	0
XLOC_003229	PREDICTED: protein FAR1-RELATED SEQUENCE 6-like [Brachypodium distachyon]	1.30051	1.14301	1.84483	1.17546	2.09236	0.637928	3.14984	0.629501	3.34888	7.99182	6.53447	8.73888	7.6332	8.27732	3.57508	0	0	0	3.77731	1.22515	6.00426
XLOC_065204	hypothetical protein VITISV_008907 [Vitis vinifera]	217.986	165.996	169.102	267.346	135.577	194.806	91.093	59.0693	72.5107	210.943	423.473	511.106	433.309	179.955	252.224	33.103	56.6692	22.5114	47.538	70.2362	92.1381
XLOC_016688	Os02g0832400 [Oryza sativa Japonica Group] >gi|113538158|dbj|BAF10541.1| Os02g0832400, partial [Oryza sativa Japonica Group]	35.6388	37.3966	27.8675	20.5132	28.8977	37.8832	15.4282	6.73991	187.736	254.219	191.184	254.756	150.98	45.4233	60.5396	1.74177	0	1.23829	22.1758	12.2213	21.7442
XLOC_090917	PREDICTED: UPF0565 protein C2orf69 homolog [Vitis vinifera] >gi|147864514|emb|CAN82628.1| hypothetical protein VITISV_028129 [Vitis vinifera] >gi|297734607|emb|CBI16658.3| unnamed protein product [Vitis vinifera]	3.63575	2.15706	3.07787	3.33815	1.33655	3.1163	1.70507	2.38391	6.34133	3.16386	1.96575	2.35938	0.997636	5.96494	10.9596	4.76628	0	6.98926	0.216884	14.8428	6.60221
XLOC_028024	Unknown protein [Oryza sativa Japonica Group] >gi|31431836|gb|AAP53555.1| expressed protein [Oryza sativa Japonica Group]	0	0.507287	0	0	0	0	17.1594	5.16861	0	0	0.409247	0	0.335715	0	0	0	0	0	0	0	1.75549
XLOC_019192	Uncharacterized protein TCM_034955 [Theobroma cacao]	11.2881	7.41849	12.8672	8.06802	8.53562	12.2946	96.9315	9.55038	3.89476	7.18615	9.87881	4.32893	5.47366	36.9071	95.363	12.6582	9.02893	22.8465	53.4911	4.31589	10.3674
XLOC_080955	predicted protein [Hordeum vulgare subsp. vulgare]	11.1196	8.79272	7.77628	10.8839	6.74677	7.72481	9.41119	18.3216	7.57866	21.7104	28.2746	32.1551	26.7851	7.16505	2.13799	0	0	0	0.651182	0	0.22869
XLOC_084852	PREDICTED: caffeic acid 3-O-methyltransferase 1-like isoform 2 [Vitis vinifera]	14.1077	16.893	22.6257	12.5975	10.6064	15.8919	10.014	2.35293	11.7763	9.94755	8.2276	8.26806	7.50351	10.1272	21.7238	3.0483	2.03926	1.66391	33.6802	14.4351	17.9369
XLOC_082354	hypothetical protein PRUPE_ppa020237mg [Prunus persica]	10.1499	8.91539	7.72164	8.12816	5.4586	6.52534	0	0.469492	5.88835	6.7602	6.0924	5.03769	4.09957	1.62704	0	0	0	1.40764	4.77778	3.95459	4.16615
XLOC_068879	PREDICTED: uncharacterized protein LOC100841524 [Brachypodium distachyon]	6.98022	6.17369	7.90521	7.61041	7.69728	4.64377	8.57226	4.23977	3.94583	2.16641	1.39619	1.82996	0.298732	0.167497	6.98131	2.03988	4.3969	3.01113	19.7229	4.64142	11.7767
XLOC_019360	Eukaryotic release factor 1-2 [Theobroma cacao]	6.57726	6.94437	11.4536	7.6364	7.13788	9.07677	4.34214	4.63025	6.59108	11.8302	12.6797	10.7828	14.6454	10.0883	11.8451	4.99493	1.24873	3.80589	7.62992	0.109264	0.398168
XLOC_052462	PREDICTED: uncharacterized protein LOC100254432 [Vitis vinifera]	0.0177891	0.0647363	0.0741941	0.0239382	0.0552319	0.0228502	5.76197	3.9542	11.3868	7.42503	6.97402	7.47467	7.33266	19.4548	16.9494	3.53577	1.59299	3.07032	14.1572	6.6294	8.61329
XLOC_061471	hypothetical protein [Arabidopsis thaliana]	16.1036	11.6135	14.4114	15.5259	17.5315	11.002	11.0665	12.8859	28.6509	25.3952	22.2512	30.2261	16.9543	10.4442	11.7814	2.02918	0	1.58564	6.77412	8.53322	15.6361
XLOC_056725	Type-a response regulator [Theobroma cacao]	3.60305	6.04438	9.57247	3.35289	4.26649	5.81428	6.15345	10.9698	62.9954	36.9745	53.0837	25.0051	14.4491	146.635	320.219	31.7323	31.982	37.152	9.87745	14.001	12.2883
XLOC_088305	3'-5' exonuclease domain-containing protein / K domain-containing protein / KH domain-containing protein isoform 2 [Theobroma cacao]	38.0406	36.0061	42.7241	35.3393	36.6715	38.3161	117.76	71.943	13.9932	9.86468	10.1014	14.7539	10.1928	48.2225	19.4333	4.67867	4.39002	4.50733	6.87617	15.6459	17.6501
XLOC_054017	predicted protein [Populus trichocarpa] >gi|118485433|gb|ABK94573.1| unknown [Populus trichocarpa] >gi|222839230|gb|EEE77581.1| predicted protein [Populus trichocarpa]	1.50069	0	0	0	0	4.27999	37.6639	7.4719	2.18768	0	0	0	0	0	0	0	0	0	0	0	0.236931
XLOC_000953	zinc finger CCCH type domain-containing protein ZFN-like 3 [Zea mays]	1.22082	0.611154	3.62953	2.41151	1.99415	1.69781	1.86955	1.09424	10.124	1.31163	0.974007	1.44264	0	0	0.531322	0	0	0	0.821322	0	1.51737
XLOC_039656	laccase, putative [Ricinus communis] >gi|223539928|gb|EEF41506.1| laccase, putative [Ricinus communis]	7.59907	8.63292	4.73815	11.5707	10.4388	5.50815	11.1559	13.0949	10.4777	16.3452	16.4848	13.9984	13.0314	26.1187	5.25343	0	0	0	7.33712	2.33589	3.95263
XLOC_008630	hypothetical protein PRUPE_ppa010887mg [Prunus persica]	10.5746	10.3283	9.05226	8.4459	11.4323	11.274	11.2996	4.31151	9.21972	12.5634	11.4877	7.611	10.0211	9.16203	11.3026	28.7838	28.196	28.2779	12.1872	8.30557	11.8241
XLOC_034989	predicted protein [Populus trichocarpa] >gi|222845496|gb|EEE83043.1| predicted protein [Populus trichocarpa]	0.820694	1.97577	8.33501	0.909231	1.32024	2.09121	0	0	0	0	0	0	0	6.59918	1.66897	4.65266	6.79086	7.96539	0.584988	0	0
XLOC_012675	L-ascorbate oxidase [Aegilops tauschii]	1.30219	0.659855	1.21466	0.465177	0.602496	3.59869	0	0	14.3544	11.973	8.13283	8.80558	7.40421	10.7661	10.8421	4.76192	0	0	15.7455	7.34588	5.35966
XLOC_008836	PREDICTED: uncharacterized protein LOC101784167 [Setaria italica]	71.3492	108.134	75.3109	77.7683	121.097	140.185	49.5877	11.2484	203.55	514.769	690.931	1143.46	659.564	103.704	26.4442	0	0	0	81.9016	81.2684	67.5219
XLOC_010122	hypothetical protein PRUPE_ppa003160mg [Prunus persica]	2.50826	2.15159	2.79745	3.2903	2.01117	1.89275	5.20069	12.421	0.87901	4.15995	5.00684	5.19337	2.65553	5.31924	7.68395	2.83741	2.0769	2.21835	6.73294	11.1672	10.369
XLOC_039848	PREDICTED: dynamin-related protein 1C-like, partial [Cucumis sativus]	57.3182	42.4589	41.7214	61.4214	49.1451	46.8162	49.3383	28.1607	72.1571	80.1909	108.763	61.0315	72.2695	45.8416	52.2046	92.0564	70.889	104.848	31.2134	33.6016	32.9755
XLOC_087111	hypothetical protein SORBIDRAFT_06g025270 [Sorghum bicolor] >gi|241939507|gb|EES12652.1| hypothetical protein SORBIDRAFT_06g025270 [Sorghum bicolor]	7.24078	4.47587	6.66465	5.21725	6.02345	9.14335	5.56582	5.26022	0.516043	2.62437	2.65999	3.03993	4.13436	5.88728	3.97636	0	0	0	0.557782	3.55903	2.5152
XLOC_087977	hypothetical protein SORBIDRAFT_03g008200 [Sorghum bicolor] >gi|241927285|gb|EES00430.1| hypothetical protein SORBIDRAFT_03g008200 [Sorghum bicolor]	4.2126	5.33816	10.7713	3.66066	2.94044	4.77438	9.44662	2.59236	0	9.46023	7.73928	7.49929	4.74709	74.3066	43.2273	22.737	13.4908	10.9553	17.8705	8.89708	9.40402
XLOC_062828	Os03g0699400 [Oryza sativa Japonica Group] >gi|28273362|gb|AAO38448.1| silencing group B protein [Oryza sativa Japonica Group] >gi|108710584|gb|ABF98379.1| N-acetyltransferase 5, putative, expressed [Oryza sativa Japonica Group] >gi|113549459|dbj|BAF12902.1| Os03g0699400 [Oryza sativa Japonica Group...	8.2101	6.30889	9.1206	5.50324	7.6497	6.87525	24.0275	24.5775	2.57065	17.9802	18.4065	20.3574	24.6023	42.5345	35.9663	27.3271	33.7397	20.1877	92.1261	35.3423	42.0365
XLOC_007831	BTB/POZ/MATH-domains containing protein isoform 2 [Theobroma cacao]	8.24252	9.12288	7.54988	6.93401	7.5594	5.26956	4.44199	2.54978	0.482912	1.50458	0.754485	1.13626	1.19441	2.38347	2.28691	0	1.24061	1.92084	1.45412	1.0704	1.46251
XLOC_037713	predicted protein [Hordeum vulgare subsp. vulgare]	0.147792	0	0.340401	0.101977	0.499373	0	2.03014	6.66527	0.0853668	0.825856	0.843774	0.905328	0.333261	0	0	0	0	0	0.553777	0	0.0372399
XLOC_028639	PSII D2 protein [Saccharum officinarum] >gi|68131210|dbj|BAE02567.1| PSII D2 protein [Saccharum officinarum] >gi|68131212|dbj|BAE02568.1| PSII D2 protein [Saccharum spontaneum] >gi|68131214|dbj|BAE02569.1| PSII D2 protein [Saccharum spontaneum]	61.7283	51.7721	26.2242	23.4617	75.9509	47.2091	0	0	0	0	56.1175	16.8606	0	33.9503	75.6028	0	27.5988	0	188.75	53.1277	29.6059
XLOC_009440	hypothetical protein PRUPE_ppa022250mg [Prunus persica]	1.46299	1.40989	0.695228	1.32407	1.67922	1.68701	1.375	1.12161	0	0.124744	0	0.249156	0	0	0	0	0	0	0	0.365629	0.110406
XLOC_030597	PREDICTED: condensin complex subunit 2-like [Brachypodium distachyon]	6.07894	4.44256	3.68835	6.36301	3.6712	2.95663	0	0.536954	1.03463	1.21166	0.531477	0.438853	0.399123	0.253153	0.649494	0	0	0	1.8587	0.820665	1.56955
XLOC_006126	PREDICTED: uncharacterized protein LOC101223829 isoform 1 [Cucumis sativus] >gi|449530796|ref|XP_004172378.1| PREDICTED: uncharacterized protein LOC101223829 isoform 2 [Cucumis sativus]	1.83286	11.5817	7.394	5.09935	13.8775	10.7615	3.28383	2.42299	0	11.3086	25.6088	9.66854	23.0705	9.3564	6.10434	0	0	0	1.05845	10.2519	1.57027
XLOC_035453	PREDICTED: uncharacterized protein At4g28440-like [Fragaria vesca subsp. vesca]	0	0	0	0.0938436	0.0548676	0.090562	12.0799	11.8918	0	0.167702	0.267775	0.155273	0.201295	0.475647	0.696314	0	0	0	0.2668	0.499727	0.647111
XLOC_023466	hypothetical protein PRUPE_ppa023138m1g, partial [Prunus persica]	12.696	13.3901	16.2874	13.1927	11.745	14.5166	9.72164	3.74533	3.76378	9.95233	10.5754	9.47644	8.11145	23.5842	27.7535	18.2261	16.857	19.9041	5.54539	5.7691	7.72563
XLOC_093672	hypothetical protein OsI_22418 [Oryza sativa Indica Group]	2.65011	4.88187	2.5023	4.55163	2.8232	3.23723	0	1.22168	0.176038	0	0.211514	0	0.597151	0	0	0	0	0	0.666705	0	0.055097
XLOC_092945	Class I glutamine amidotransferase-like superfamily protein isoform 1 [Theobroma cacao]	7.57273	8.59383	9.35371	6.19957	7.65653	6.86688	58.5972	40.6907	45.8153	71.7232	86.6021	79.2914	73.8779	110.466	112.907	84.8861	79.4365	94.1696	77.0819	63.8968	73.794
XLOC_046139	hypothetical protein ZEAMMB73_290783 [Zea mays]	2.94862	2.4927	2.86901	3.15307	2.93826	2.72868	1.73453	0.952666	0	0.124385	0.0991473	0.175198	0.157466	0.103183	0	0	0	1.74e-05	0	0	0
XLOC_030341	predicted protein [Populus trichocarpa] >gi|222843148|gb|EEE80695.1| predicted protein [Populus trichocarpa]	0.0983503	0	0.407707	0.196722	0.379339	0.125833	0.111922	0	5.97703	8.18716	3.81229	1.93191	4.44884	0	0.218688	0	1.2102	0.435724	4.39538	0.359797	0.219811
XLOC_073322	conserved hypothetical protein [Ricinus communis] >gi|223537040|gb|EEF38676.1| conserved hypothetical protein [Ricinus communis]	23.2541	24.563	44.6239	36.18	37.5796	32.835	0	12.5349	22.6891	82.8352	127.689	130.002	91.3786	33.7819	25.4282	7.57392	7.57392	5.97875	21.9989	15.2425	22.2602
XLOC_068154	hypothetical protein SORBIDRAFT_09g000780 [Sorghum bicolor] >gi|241945709|gb|EES18854.1| hypothetical protein SORBIDRAFT_09g000780 [Sorghum bicolor]	0.121617	0.46725	0.133663	0.0821857	0.194214	0.251872	0	0	2.25153	7.35026	8.7602	6.01262	8.38562	0	0	0	1.26644	0	14.4297	0.578386	0.391186
XLOC_030266	PREDICTED: uncharacterized protein LOC101207905 [Cucumis sativus]	12.0011	35.8279	33.1913	20.2645	9.55833	42.8832	22.6375	7.21213	34.1933	2.40673	4.90871	0	2.30805	9.23939	3.30477	0	0	0	3.34819	0.852294	1.91723
XLOC_026447	hypothetical protein PRUPE_ppa007367mg [Prunus persica]	14.6412	14.1522	12.7558	13.9031	16.2234	12.6286	14.735	1.7295	12.7784	4.30431	3.83805	3.45673	3.90715	6.35769	8.48115	3.62284	4.23862	3.36011	1.95532	2.29735	7.56594
XLOC_013919	unknown [Medicago truncatula]	4.7166	11.0303	3.66364	5.13693	12.4579	13.0486	10.4006	11.4664	8.431	13.8111	11.1367	8.39987	7.10891	20.3262	20.8765	46.4058	34.5896	24.2915	4.64565	10.5038	12.6717
XLOC_003770	Uncharacterized protein isoform 1 [Theobroma cacao]	284.801	1217.8	918.094	855.776	686.473	1375.32	0	141.296	7.46254	958.121	2776.74	2376.67	1664.61	202.684	890.796	353.09	1392.2	15361.1	1315.68	165.691	320.514
XLOC_088173	putative cold-inducible protein [Camellia sinensis]	1.10835	0.311292	0.727936	0.465572	1.74516	0.267379	1.08376	1.93697	0	0.140685	0	0	0	1.62414	1.48871	0	0	0	0.303328	0	0
XLOC_041772	hypothetical protein OsI_18539 [Oryza sativa Indica Group]	2.73045	2.17739	1.28652	0.849367	1.78024	1.51285	0.821047	0.665029	0	0	0	0	0	0	0	0	0	0	0	0	0
XLOC_021656	PREDICTED: uncharacterized protein At2g33490-like [Glycine max]	11.3877	11.2063	13.1732	13.3153	12.6354	9.5612	34.5835	19.2368	5.88129	14.2912	15.9446	14.9204	19.4888	14.5967	10.6846	3.78501	3.78501	2.42777	7.09124	3.14629	5.41163
XLOC_072448	hypothetical protein VITISV_043311 [Vitis vinifera]	10.4471	8.19719	3.67889	6.35662	6.2273	7.12285	2.35347	1.40684	30.9337	20.45	17.5541	23.609	18.4012	6.84587	3.8054	0.521838	0	0.197604	6.66356	4.38081	8.15205
XLOC_003592	Os07g0572800 [Oryza sativa Japonica Group] >gi|122167164|sp|Q0D598.1|WNK1_ORYSJ RecName: Full=Probable serine/threonine-protein kinase WNK1; Short=OsWNK1; AltName: Full=Mitogen-activated protein kinase kinase 1; AltName: Full=Protein kinase with no lysine 1 >gi|113611597|dbj|BAF21975.1| Os07g0572800...	2.48487	2.06815	2.5791	2.63565	2.16069	1.25529	0.808295	0.811052	0	0.143632	0.342324	0.209182	0.524381	0	0.000149513	0	0.475758	0	0.0661726	0.246608	0.937718
XLOC_022037	SQUAMOSA promoter-binding-like 4 [Erycina pusilla]	0	0	0	0	0.179809	0	0.296212	1.04579	0	0	0	0	0.119701	0	0	1.4803	0	0	0	0.906681	0.584679
XLOC_074419	conserved hypothetical protein [Ricinus communis] >gi|223548806|gb|EEF50295.1| conserved hypothetical protein [Ricinus communis]	1.91464	1.12108	1.59984	1.6013	0.863578	1.37216	8.24792	3.81011	1.84307	1.45863	1.49115	1.86805	2.2998	3.26729	7.79802	2.76173	2.0713	1.59272	3.31432	5.25592	9.45391
XLOC_009374	hypothetical protein F775_10408 [Aegilops tauschii]	1.36189	2.17291	2.15792	1.98682	2.42547	1.6195	11.2584	8.46444	0	0	0	0	0	0	0	0	0	0	1.60594	0.0907085	0
XLOC_048875	Kinase protein with adenine nucleotide alpha hydrolases-like domain isoform 3, partial [Theobroma cacao]	0	0	0	0.21603	0	0.123669	0.143873	0	2.16609	0.285822	0	0.519908	0.209124	0.142351	0	0	0	0	0	0	0
XLOC_009625	hypothetical protein VITISV_035489 [Vitis vinifera]	346.987	540.32	411.509	477.035	353.543	275.6	0	28.3013	0	0	0	0	0	4.48863	0	22.3382	0	0	0	0	0
XLOC_087651	Bi-ubiquitin [Medicago truncatula] >gi|355518872|gb|AET00496.1| Bi-ubiquitin [Medicago truncatula] >gi|388497058|gb|AFK36595.1| unknown [Medicago truncatula]	41.9749	46.9553	57.8627	40.5348	55.8289	48.6386	72.4537	69.954	34.0151	84.5417	99.8316	99.5205	139.655	68.1585	73.6344	69.1432	35.9233	298.595	384.699	6.62078	101.498
XLOC_020663	unknown [Picea sitchensis]	16.469	17.9945	17.7903	20.1112	18.0505	16.1896	25.7511	21.6947	23.2132	30.9982	32.4631	31.7037	29.983	45.3752	57.5321	22.4034	13.2311	18.4444	21.3846	36.3859	40.2782
XLOC_080675	hypothetical protein SORBIDRAFT_05g021360 [Sorghum bicolor] >gi|241936773|gb|EES09918.1| hypothetical protein SORBIDRAFT_05g021360 [Sorghum bicolor]	21.4956	22.4172	17.9742	21.3225	26.8747	17.5056	9.6434	6.04401	12.6954	30.115	35.4014	25.7733	34.9288	13.7402	12.6279	13.1803	5.64446	5.49345	7.51674	16.8128	14.7224
XLOC_033898	Uncharacterized protein TCM_029413 [Theobroma cacao]	2.636	3.35787	1.48255	4.35498	2.42733	2.59696	4.89288	3.69378	5.73276	5.68211	3.77326	4.52132	4.07423	2.91586	1.87685	0	0	0	1.40223	0.663381	2.07101
XLOC_023576	PREDICTED: ATP-dependent DNA helicase srs2-like isoform X3 [Setaria italica]	11.8275	9.5463	6.24632	8.39787	9.30298	7.49641	0.568011	2.68421	1.30616	0.437836	0.654165	0.437675	0.293747	0.278594	0	0	0	0.457402	0.0501209	0.0408713	0.0382514
XLOC_054819	hypothetical protein PRUPE_ppa002387mg [Prunus persica]	20.2835	25.6882	30.995	21.9568	21.0614	25.0128	4.85086	7.09119	19.0092	22.8536	21.4272	22.2791	25.2301	18.1986	13.9449	17.9205	15.77	17.1547	12.97	11.9668	14.89
XLOC_080498	predicted protein [Populus trichocarpa] >gi|222868377|gb|EEF05508.1| predicted protein [Populus trichocarpa]	9.70923	8.48616	9.88604	12.2627	10.072	10.5114	8.0967	7.17229	0.487766	4.18305	4.093	4.26584	5.06098	3.56776	5.83695	34.9286	29.8082	35.4336	20.2216	7.35523	12.8567
XLOC_033758	Bystin, putative [Theobroma cacao]	7.98073	8.85242	8.21383	8.65679	10.6935	7.67398	14.1693	13.9426	1.10815	5.42509	4.78573	4.14482	6.32123	5.276	5.20429	3.08377	0	1.57257	1.09247	4.01156	3.14129
XLOC_001811	hypothetical protein OsJ_04797 [Oryza sativa Japonica Group]	26.2987	26.2618	40.8489	24.7284	23.9805	25.3885	101.905	54.5072	18.6759	35.3689	39.2613	41.0327	41.9746	34.066	54.7725	54.8784	45.7713	35.3618	11.0711	19.7589	20.4928
XLOC_093655	predicted protein [Hordeum vulgare subsp. vulgare]	0.469916	0.455847	0.278519	0.230965	0.21206	0.204493	0.538678	0.547273	0.710656	0.750579	0.102643	0.0125292	0.288303	0	0.438167	0	0.000144097	0	4.40694	0.517111	0
XLOC_092090	Hexose carrier protein HEX6 [Aegilops tauschii]	0	0	0	0	0	0	0	0	0	3.91e-05	0.0849609	0.0785469	0	0.781064	1.24443	0	0	0	0.112754	0	0
XLOC_084037	hypothetical protein OsJ_32010 [Oryza sativa Japonica Group]	8.02432	4.16694	7.8552	9.22806	8.32076	11.5894	85.5165	10.6149	0	24.449	10.0844	6.06313	19.1383	18.1931	21.5371	6.18456	0	4.44376	8.14075	18.5135	7.24185
XLOC_002311	cinnamoyl CoA reductase [Eucalyptus amygdalina]	109.594	97.3048	99.6406	135.66	119.154	97.5993	99.5165	150.667	146.091	192.113	122.464	186.951	200.926	150.712	101.479	28.4372	28.4372	27.9825	401.233	403.512	239.861
XLOC_006002	Cleavage and polyadenylation specificity factor 73 kDa subunit-II [Theobroma cacao]	3.11678	5.42369	0	5.68752	4.39755	2.84018	2.1512	0	0	2.27695	3.73774	6.84917	0	4.41492	3.4771	6.27305	0	0	0.826684	5.03698	4.39911
XLOC_001652	putative pto kinase interactor protein [Elaeis guineensis]	22.5159	19.0024	21.5394	16.565	16.6511	22.422	46.2332	39.2194	31.3616	34.4536	46.8883	40.9119	34.1839	99.4382	26.8444	42.4399	50.4672	54.6708	12.2457	11.2894	10.8694
XLOC_007689	PREDICTED: uncharacterized protein LOC100254467 [Vitis vinifera]	13.7242	14.3677	16.6994	16.0055	12.6596	10.6975	6.4378	4.13259	27.227	23.805	20.2559	18.0684	23.0902	12.7881	10.84	1.78562	0.586071	1.79859	4.83002	7.57002	7.21277
XLOC_064023	predicted protein [Populus trichocarpa] >gi|222838231|gb|EEE76596.1| predicted protein [Populus trichocarpa]	6.16632	6.23171	6.26808	4.60812	6.39183	6.89634	2.01513	2.64789	5.72926	8.44214	8.13598	6.14115	4.36446	2.48377	2.50939	1.84045	0.625469	2.9927	1.75504	3.01822	3.40208
XLOC_063380	F-box protein [Allium cepa]	2.26513	0.867079	1.72438	1.85709	1.55085	1.83046	3.64371	1.4373	1.42192	1.91311	3.38398	3.17932	4.48219	3.10874	3.31828	0	1.60682	1.90895	2.2564	3.21941	2.81484
XLOC_014835	PREDICTED: ribosomal RNA small subunit methyltransferase B-like [Fragaria vesca subsp. vesca]	2.92072	3.65879	4.94665	1.16523	1.28489	3.80753	16.6637	7.02722	0	0	0	0	0	0	0	0	0	0	0	0	0.937978
XLOC_031455	unknown [Zea mays] >gi|413954412|gb|AFW87061.1| hypothetical protein ZEAMMB73_887138 [Zea mays]	2.73838	2.09683	1.7405	2.49625	1.49166	2.18299	2.1402	0.111647	8.20347	0.998685	0.83242	1.36481	0.785375	0.479211	1.20605	23.1384	8.69174	17.4568	3.97134	22.0597	4.83781
XLOC_058194	PREDICTED: ER lumen protein retaining receptor-like [Cicer arietinum]	0	0	0	0	0	0	8.86205	11.5653	0	0	0.190536	0	0	0	0.289094	0	0	0	0	0	0
XLOC_010539	ATPase E1-E2 type family protein / haloacid dehalogenase-like hydrolase family protein isoform 1 [Theobroma cacao] >gi|508774996|gb|EOY22252.1| ATPase E1-E2 type family protein / haloacid dehalogenase-like hydrolase family protein isoform 1 [Theobroma cacao]	5.30806	8.68871	11.0606	4.61059	5.11767	8.09292	10.1704	6.3602	4.0794	10.8744	12.8583	17.3827	19.9881	5.24933	2.40666	3.66889	5.25041	5.53622	4.15719	14.1953	12.8959
XLOC_014436	PREDICTED: putative cyclic nucleotide-gated ion channel 18-like [Brachypodium distachyon]	1.5983	2.25268	1.00737	2.8884	2.4324	1.71661	0.130056	0.0735331	0.324154	0.904793	1.08981	0.676951	0.197655	0	0.118737	3.29725	2.61698	2.52147	2.07447	0.308654	1.45369
XLOC_041413	hypothetical protein MTR_3g106030 [Medicago truncatula] >gi|355492346|gb|AES73549.1| hypothetical protein MTR_3g106030 [Medicago truncatula]	1.40129	2.72278	0.986053	2.65362	0.867763	1.92525	1.65322	0	0	0.987037	0.960693	1.81095	0.470283	2.04124	0.659463	0	6.72e-05	0	4.00813	2.65335	2.67593
XLOC_038715	expressed protein [Oryza sativa Japonica Group]	3.84876	2.88333	6.30173	6.22988	4.60927	4.2334	4.91418	3.94387	0	4.79585	5.3239	4.48419	5.07897	2.40831	6.57118	0	0	0	0.355516	0.298377	0.728769
XLOC_069715	hypothetical protein OsI_25737 [Oryza sativa Indica Group]	3.19362	6.61682	4.25764	4.11871	5.42976	4.53503	2.58367	3.77952	0	0	0	0	0	0	0.498342	0	0	0	0.141061	0	0
XLOC_024712	PREDICTED: uncharacterized protein LOC101305708 [Fragaria vesca subsp. vesca]	1.73079	1.36998	2.01528	1.62852	1.87678	1.42738	2.70971	1.61301	10.3092	8.23171	9.80338	9.59457	8.27514	4.45122	4.53102	13.1411	8.81555	10.5602	3.99025	3.17041	3.75218
XLOC_053619	S-adenosylmethionine-dependent methyltransferase, putative [Ricinus communis] >gi|223547020|gb|EEF48517.1| S-adenosylmethionine-dependent methyltransferase, putative [Ricinus communis]	0	0	0	0	0	0	0.656327	0.901837	0	0	0	0	0	0	0	0	0	0	0	0	0
XLOC_034124	hypothetical protein PRUPE_ppa002114m1g, partial [Prunus persica]	15.7233	11.9247	12.4608	15.5914	14.3057	13.7572	16.3733	9.84329	33.5488	21.3631	23.9683	30.2779	23.5216	24.9796	18.9164	4.99769	0	0	6.52072	10.337	9.14645
XLOC_027695	predicted protein [Populus trichocarpa] >gi|222858356|gb|EEE95903.1| predicted protein [Populus trichocarpa]	13.0851	14.4938	43.2918	10.826	12.0793	11.6188	40.305	11.7115	0.784919	5.99115	4.59587	1.96831	1.80477	29.8928	96.6378	0	16.2658	1.86346	21.8463	22.2258	47.567
XLOC_053777	hypothetical protein OsJ_00739 [Oryza sativa Japonica Group]	0.66999	0.906211	2.22281	1.17501	0.960754	1.00206	0.194997	0.315158	0.402529	2.25147	1.08178	1.46746	1.82621	1.02694	2.99344	0	0	0.477719	5.74667	0.211603	0.368718
XLOC_049153	Haemolysin-III related family protein, expressed [Oryza sativa Japonica Group] >gi|125542782|gb|EAY88921.1| hypothetical protein OsI_10405 [Oryza sativa Indica Group] >gi|125585282|gb|EAZ25946.1| hypothetical protein OsJ_09801 [Oryza sativa Japonica Group]	0.573693	0.236323	0.820789	0.312033	0.700345	0.58611	0	0.688402	0.0696957	0.289593	0.525254	0.0707033	0.263954	0.710562	1.932	2.18786	0.677308	0.583359	3.09513	0.667679	0.797959
XLOC_013529	unnamed protein product [Vitis vinifera]	0.353223	0.199025	0.334114	0.757259	0.545403	0.494718	1.904	2.81468	0	0	0.0557077	0	0	3.64346	2.6715	5.37835	9.88801	8.88106	14.8998	5.98178	8.13476
XLOC_051491	PREDICTED: BES1/BZR1 homolog protein 4 [Vitis vinifera]	1.3883	0.743911	0.914046	1.26892	1.24503	0.637886	2.65873	2.81082	0.177685	1.92508	2.93438	2.64037	1.53791	3.53244	5.60273	0	2.16738	0	8.9747	17.6293	10.6932
XLOC_071282	hypothetical protein OsI_20406 [Oryza sativa Indica Group]	0.523186	0.397856	1.70868	0.759768	0.869632	0.793659	4.27504	14.1421	19.0165	2.61822	10.7799	7.32146	7.92971	2.5807	4.78623	3.59091	6.89603	3.87858	4.38409	1.24031	0.483255
XLOC_088552	hypothetical protein OsJ_05839 [Oryza sativa Japonica Group]	65.6042	67.7955	56.5612	73.2215	67.4254	58.4015	31.4087	20.8147	159.08	178.392	201.974	169.629	193	238.663	141.848	252.849	255.916	231.769	53.5611	87.5988	97.3021
XLOC_081706	UFGT1 [Phalaenopsis equestris]	0.167544	0.397882	0.816817	0.340017	0.401636	0.612378	17.8507	5.01372	0	0.095201	0.0485776	0.046506	0	2.77333	1.90091	1.18665	0	0.456965	0.664962	1.9728	1.35935
XLOC_063319	PREDICTED: probable glucan endo-1,3-beta-glucosidase A6-like [Vitis vinifera] >gi|296089651|emb|CBI39470.3| unnamed protein product [Vitis vinifera]	0.653811	0.42802	1.0909	0.660376	0.704584	0.501306	0.972959	0.780828	0.753148	1.29773	0.876001	0.905833	1.32377	0.136738	0.557267	0	0.629003	1.06709	0.251316	0.43384	0.275972
XLOC_009899	hypothetical protein OsJ_06221 [Oryza sativa Japonica Group]	14.7585	17.6087	22.6517	14.926	17.2781	20.2071	62.3252	42.938	20.9062	18.9815	23.9956	24.4869	23.0483	61.5399	74.7288	17.5612	14.5466	17.1057	16.671	27.316	41.9792
XLOC_089631	hypothetical protein SORBIDRAFT_06g018350 [Sorghum bicolor] >gi|241939115|gb|EES12260.1| hypothetical protein SORBIDRAFT_06g018350 [Sorghum bicolor]	0.0798155	0	0	0	0	0	0.192234	86.3691	0	2.63371	4.33781	3.05337	4.52856	0	0	0	1.6761	1.10049	0.575047	0.42848	0.320419
XLOC_070116	predicted protein [Populus trichocarpa] >gi|222842668|gb|EEE80215.1| predicted protein [Populus trichocarpa]	8.45018	6.10745	4.83491	10.8705	6.05185	6.44094	5.04388	4.32271	2.28613	5.68041	6.81211	6.38572	4.6481	6.81741	5.18461	0	0	3.89747	14.752	10.1029	12.9401
XLOC_009523	Nucleic acid-binding [Theobroma cacao]	49.6364	31.4746	31.7947	38.1258	38.174	33.1034	35.9002	26.1816	13.9597	22.2262	24.6496	23.7609	24.1913	31.0455	37.4779	228.09	202.735	134.147	55.8428	24.2692	40.8996
XLOC_049961	PREDICTED: F-box protein At4g18380-like [Setaria italica]	3.11271	3.73936	6.92575	4.68262	3.51441	3.41997	3.1479	4.24954	0.259045	10.2081	7.74286	7.41752	9.93753	9.11744	5.76647	24.412	27.6583	17.6331	26.9055	6.59153	7.43898
XLOC_083131	ketol-acid reductoisomerase [Elaeis guineensis]	0.445878	0.215195	0	0.157637	0	0.600693	0	0	0	0.267667	1.80697	0.134013	1.78931	0	0.678169	0	0	0	0.889867	0	0.174938
XLOC_008497	PREDICTED: CBL-interacting serine/threonine-protein kinase 1-like isoform 1 [Solanum lycopersicum]	68.9702	24.5783	69.8469	80.7903	42.9452	15.1905	4.19202	1.19187	9.53734	43.9884	46.8066	97.5717	184.747	3.15423	20.9962	2.83598	0	0	4.52174	1.79053	2.57778
XLOC_000359	PREDICTED: transcription factor UNE12-like [Fragaria vesca subsp. vesca]	1.47635	1.03153	1.05247	2.78606	1.89003	1.15026	0	0.148408	0	0.124858	0.364981	0	0	0	0	0	0	0	0.595213	0.430895	0.281713
XLOC_041166	unnamed protein product [Vitis vinifera]	54.0008	47.152	42.346	65.9983	54.0181	48.8602	60.7043	51.4815	22.6428	43.1151	38.5092	32.5634	30.1647	36.1455	23.6386	84.656	121.831	87.5109	63.0115	52.5197	117.446
XLOC_079691	OPC-8:0 CoA ligase1 isoform 2 [Theobroma cacao]	5.64394	5.56362	5.4154	7.81814	4.66677	7.53056	9.59228	9.63868	7.15609	2.93512	4.55177	2.74627	2.87103	26.5214	31.5684	0	3.44469	1.98103	41.4219	17.105	14.0467
XLOC_022115	PREDICTED: L-ascorbate oxidase homolog [Glycine max]	1.18164	0.813269	0.658364	1.21359	1.32946	1.78754	9.30029	31.0293	17.087	0.279554	0.958525	1.39079	0.253958	7.35308	10.695	23.2168	15.5819	23.4172	116.075	51.6075	82.4216
XLOC_085843	unknown [Populus trichocarpa]	51.0869	48.3495	56.9459	65.6117	60.7502	60.5677	39.6781	49.7515	9.83959	22.5772	28.5752	35.1211	28.0817	13.7876	13.0525	51.9836	52.0097	51.0041	31.7463	13.249	30.831
XLOC_055575	PREDICTED: cytosolic enolase 3-like [Cicer arietinum]	40.6371	33.2211	24.1469	39.6977	34.605	26.7434	14.8351	19.6928	74.0993	55.8173	65.5594	61.3651	50.9209	43.3171	17.4845	2.58146	4.69356	5.12125	13.9413	24.822	34.405
XLOC_022804	PREDICTED: uncharacterized protein LOC100805984 [Glycine max]	212.812	251.295	229.925	688.694	0	642.601	6.40071	238.812	4176.18	2424.81	3379.28	4927.15	1368.14	1998.2	10150.2	538.562	487.72	9086.86	234.015	230.079	238.678
XLOC_087499	PREDICTED: glucan endo-1,3-beta-glucosidase 12-like [Cicer arietinum]	0.899873	0.874436	1.12546	0.595401	1.03074	1.52174	0.180531	0.201473	1.85793	1.09619	1.00335	1.5798	0.835157	0	0	0	0	0	1.75397	0.180932	0.308016
XLOC_072376	hypothetical protein OsJ_25328 [Oryza sativa Japonica Group]	3.6224	0	0	7.43124	19.6824	17.3588	0	0	33.074	15.1439	52.2038	0	12.6275	0	0	0	0	0	0	0	0
XLOC_047304	Cleavage and polyadenylation specificity factor subunit 3-I [Triticum urartu]	29.4609	26.7382	28.6263	36.3996	34.8905	21.3871	10.6683	13.2541	10.7443	17.1732	19.7038	12.1031	14.3903	14.861	17.8049	40.5163	58.7073	62.1705	43.8313	33.643	41.6227
XLOC_005172	Uncharacterized protein TCM_010809 [Theobroma cacao]	0.723435	1.67305	0.821531	0.251569	1.79257	0.864286	1.33131	0.91611	0	0.417971	2.29e-06	0.0741856	0	1.27611	0	10.2954	4.92617	6.81351	6.49695	0.111829	0.0898966
XLOC_024440	Ataxia telangiectasia-mutated and RAD3-related [Theobroma cacao]	1.06975	0.634511	1.22302	1.32044	0.625611	1.04376	0.141727	0.157957	5.42643	1.25661	1.52701	1.07465	1.30437	1.05473	0	0	0	0	0.451511	0.44699	1.24802
XLOC_027577	hypothetical protein PRUPE_ppa005548mg [Prunus persica]	3.99979	3.74711	2.52253	3.70771	3.49836	3.46711	3.25071	4.36791	1.06128	3.95371	3.65002	2.9413	2.44969	3.96708	3.50411	2.84133	3.1525	3.24907	2.05726	3.4649	4.11203
XLOC_077903	60S ribosomal protein L13, putative [Ricinus communis] >gi|223540760|gb|EEF42320.1| 60S ribosomal protein L13, putative [Ricinus communis]	15.5723	14.1428	10.934	17.0665	15.0236	14.5709	6.83443	8.09378	20.0131	25.9632	26.1443	19.9815	24.7922	48.4773	49.0281	102.381	74.5714	76.3364	22.8063	34.4164	40.4402
XLOC_032113	cytochrome P450, putative [Ricinus communis] >gi|223547603|gb|EEF49098.1| cytochrome P450, putative [Ricinus communis]	0	0	0	0	0	0	0	0	5.00438	0.201481	2.12258	0.205752	0.718625	0.56837	0.312966	2.03863	0	0	3.87345	0	0
XLOC_039724	hemolysin III-related family protein [Lilium longiflorum]	3.01643	2.84179	3.21578	2.50776	2.76345	3.06814	6.22294	7.57781	4.42895	2.88185	5.10904	4.48531	3.20935	3.26921	2.19112	0.543	0.539396	2.8898	7.94951	0	5.86249
XLOC_033497	hypothetical protein PRUPE_ppa000061mg [Prunus persica]	23.0141	19.4728	14.8436	31.584	21.337	17.2053	28.0945	14.4218	61.7678	72.0673	74.0347	67.7622	63.1744	43.5972	53.1401	15.4572	22.3372	18.1129	24.8503	18.7972	25.3339
XLOC_001060	predicted protein [Populus trichocarpa] >gi|222861313|gb|EEE98855.1| predicted protein [Populus trichocarpa]	0.035622	0.229447	0.324083	0.116523	0.144395	0.160295	2.54493	2.74025	0	0	0	0	0	0	0.397319	0.522942	0.504696	0.397676	0.0782251	3.68084	1.77114
XLOC_022273	hypothetical protein CARUB_v10009255mg [Capsella rubella]	5.31415	5.36471	3.85872	5.39322	6.2404	6.153	6.75113	4.10341	0	4.95129	8.37645	11.5545	5.82628	9.73463	4.40073	0	0	0	2.61089	1.9875	3.91177
XLOC_080564	PREDICTED: pirin-like protein-like [Solanum lycopersicum]	0	0	0	0	0	0	3.4207	5.05766	0	0.466029	1.26058	1.51779	3.06713	0.629243	2.81669	0	0	0	0	0	0.119654
XLOC_004012	Protein EFR3-like protein [Aegilops tauschii]	434.047	789.876	524.564	998.326	609.522	501.641	176.676	58.3479	303.413	693.095	2079.89	1713.82	631.739	232.115	219.966	0	0	0	41.3258	0	0
XLOC_015318	calcineurin B-like 10 [Solanum lycopersicum] >gi|347953948|gb|AEP33594.1| calcineurin B-like 10 [Solanum lycopersicum] >gi|353523406|dbj|BAL04563.1| calcineurin B-like molecule [Solanum lycopersicum]	1.65104	0	2.71839	0.432983	0.944111	1.99622	0	0.689989	1.47663	1.17773	2.67042	7.10245	3.67244	350.824	338.342	9.75736	2.92639	6.77661	29.8289	9.26495	29.7045
XLOC_006403	PREDICTED: uncharacterized protein LOC100854830 [Vitis vinifera]	1.12747	0.955037	0.805718	1.69155	1.3235	0.788186	17.7145	5.59704	0.299574	0.540163	0.520129	0.150447	1.05455	0.46545	1.32417	2.92279	1.57404	3.02758	6.07745	2.16672	3.36193
XLOC_017386	unnamed protein product [Oryza sativa Japonica Group] >gi|215713541|dbj|BAG94678.1| unnamed protein product [Oryza sativa Japonica Group] >gi|215717057|dbj|BAG95420.1| unnamed protein product [Oryza sativa Japonica Group]	0.263093	0.206868	0.391871	0.376432	0.146519	0.314354	3.84465	4.82913	1.1741	2.03356	2.24746	2.56469	2.8769	0.475143	0.62651	2.67748	3.14491	4.29872	5.54606	4.49199	5.62892
XLOC_068798	La-related protein 7 [Triticum urartu]	0	0	0	0	0	0	13.8003	9.95955	0	0.374289	0.736681	0	0	0	0	0	0	0	0	0	0
XLOC_085577	Os05g0404600 [Oryza sativa Japonica Group] >gi|255676354|dbj|BAF17419.2| Os05g0404600, partial [Oryza sativa Japonica Group]	1.57859	1.08183	2.14902	1.919	1.41347	1.23673	10.2658	9.36973	5.48857	7.21419	7.65674	6.87653	7.41781	6.27607	0.234737	8.22911	4.10492	3.25872	22.3573	5.45814	9.95887
XLOC_021803	PREDICTED: uncharacterized protein LOC100825203 isoform 2 [Brachypodium distachyon]	6.68303	10.3702	12.5862	10.08	11.055	11.2616	46.5265	57.4344	24.4087	33.0943	35.3735	34.2928	46.4163	49.0547	41.494	2.67102	1.33551	6.09689	39.7753	4.20686	7.95731
XLOC_066428	BTB/POZ domain-containing protein isoform 2 [Theobroma cacao]	1.73781	2.06391	3.60655	1.2744	1.73676	1.75462	1.79908	0.982794	0	1.87008	2.19376	2.20646	1.75201	0.952975	1.34404	0	0	0	0.0679279	0	4.24156
XLOC_033873	PREDICTED: uncharacterized protein all1601 [Vitis vinifera] >gi|297741879|emb|CBI33314.3| unnamed protein product [Vitis vinifera]	4.74023	8.01985	9.02649	7.21328	6.13931	8.08917	21.4592	7.81129	6.19997	6.29679	7.209	7.26281	8.47161	38.3304	40.3953	2.45457	2.41318	0.371364	5.93127	3.74401	7.46063
XLOC_056514	predicted protein [Populus trichocarpa] >gi|222841094|gb|EEE78641.1| predicted protein [Populus trichocarpa]	10.8678	9.80173	7.88901	8.46207	7.94913	7.7675	1.95292	1.61433	9.4091	12.5158	10.2711	10.763	11.2948	12.309	3.38952	1.44611	3.69049	3.45954	6.21402	3.2721	5.64067
XLOC_032522	PREDICTED: urea-proton symporter DUR3-like [Solanum lycopersicum]	0.330403	0	0.479441	0.204551	0.236625	0.123259	1.94178	3.30599	2.77707	1.51867	2.35548	2.54184	2.18878	2.30946	4.27102	6.85385	9.03624	6.44057	9.18407	3.97545	0.774161
XLOC_026583	hypothetical protein PRUPE_ppa001486mg [Prunus persica]	0	0	0	0	0	0	0	0	0	833.916	1395.03	7317.39	3803.86	0	0	0	0	0	1018.69	144.051	0
XLOC_004492	PREDICTED: BTB/POZ domain-containing protein At5g48130-like [Vitis vinifera]	0.0945034	1.08153	0.607483	0.743962	0.080813	0.26545	0.678979	0.689465	4.6593	0.710133	0.538951	0	0.0915091	0.288685	0.919123	2.44613	5.32e-05	1.91002	0.472941	0.40482	0.518734
XLOC_066058	PREDICTED: omega-6 fatty acid desaturase, chloroplastic-like [Vitis vinifera] >gi|296090576|emb|CBI40939.3| unnamed protein product [Vitis vinifera]	3.28053	2.705	4.35147	3.23696	3.19118	4.05563	7.40625	5.69078	0	0.0422912	0	0.0410127	0.0363146	0.309298	0	0	0	0	0.450555	0	0.209751
XLOC_058136	PREDICTED: vacuolar cation/proton exchanger 1a-like [Setaria italica]	8.56459	8.40287	6.3542	6.71059	7.99092	6.12548	5.93776	3.15452	6.97175	4.66651	5.03284	4.83391	3.37604	10.1443	9.89067	17.0043	11.9608	12.6686	8.44178	2.24572	3.17012
XLOC_053135	jumonji domain protein [Populus trichocarpa] >gi|222864352|gb|EEF01483.1| jumonji domain protein [Populus trichocarpa]	12.3552	11.5795	10.2343	13.625	11.7777	10.0844	8.92092	7.01772	15.0119	14.2441	11.1449	13.5297	15.6891	9.65447	3.70496	8.01116	5.55947	8.62202	2.82	3.63406	3.87167
XLOC_032933	PREDICTED: protein RRP5 homolog [Fragaria vesca subsp. vesca]	56.7223	61.3969	41.7478	37.8934	45.7524	63.0883	4.283	3.92705	0	0	0	0	0	0	0	0	0	0	0	0	0
XLOC_092142	AP2 domain-containing transcription factor, putative isoform 2 [Theobroma cacao]	0	0	0	0	0	0	0	0	0	0	0	0	0	0	0	0	0	0	16.5257	0.241806	0.109572
XLOC_021752	hypothetical protein SORBIDRAFT_01g039940 [Sorghum bicolor] >gi|241919353|gb|EER92497.1| hypothetical protein SORBIDRAFT_01g039940 [Sorghum bicolor]	9.32344	16.4328	8.9985	18.4585	11.7112	12.1944	1.2221	2.69815	7.02967	10.896	9.71411	14.2473	8.0081	4.19747	2.2468	0	3.59797	0.646775	3.35677	3.44285	4.65142
XLOC_070284	unnamed protein product [Vitis vinifera]	2.51884	4.92108	5.7665	1.97513	2.75734	4.15265	0.215038	0.0619395	3.7102	17.0999	12.9189	16.6382	11.5908	0.351569	0.764575	0.652025	0	1.26784	0.439312	0.33968	0.64716
XLOC_070837	PREDICTED: D-aminoacyl-tRNA deacylase-like [Brachypodium distachyon]	11.0576	8.85464	10.3657	11.3937	12.295	14.0416	11.1001	12.0196	7.75811	14.3766	15.8249	12.7993	15.4183	16.8134	19.1825	2.21619	4.04353	4.04796	11.3143	8.61119	11.9858
XLOC_046760	Potassium transporter, putative [Ricinus communis] >gi|223543373|gb|EEF44904.1| Potassium transporter, putative [Ricinus communis]	3.59505	4.82043	5.4119	5.29047	4.5875	4.25235	13.7165	12.4013	1.15877	1.41701	1.72341	2.13047	1.40416	4.00742	7.43166	3.34122	1.65267	1.78424	0.497718	6.60256	6.44062
XLOC_092641	predicted protein [Populus trichocarpa] >gi|222861572|gb|EEE99114.1| predicted protein [Populus trichocarpa]	4.49667	4.45514	4.74289	6.01795	4.95485	5.45867	3.27995	2.21641	41.0416	33.3816	35.3553	34.3249	31.4108	4.84658	3.14915	3.20632	8.03791	6.0662	2.97924	3.48428	2.96681
XLOC_078621	predicted protein [Hordeum vulgare subsp. vulgare]	1.01947	0.715674	0.46187	0.847295	1.17242	0.780903	0.503772	1.30207	3.17706	0.536423	1.16297	0.5354	0.425395	0.507379	0.212091	2.4349	0	3.85058	3.06448	0.371343	0.98152
XLOC_058433	predicted protein [Hordeum vulgare subsp. vulgare]	139.855	203.397	142.481	174.288	133.417	159.346	40.7266	39.8168	0	0	0	0	0	0	0	2.31289	4.18217	0	0	0	0
XLOC_032838	hypothetical protein OsI_01544 [Oryza sativa Indica Group]	5.77682	0	0	7.7936	2.40938	2.08865	0	0	13.447	15.1188	18.9073	14.9669	5.74122	0	0	0	0	0	0	4.96849	0.672169
XLOC_020481	PREDICTED: histone-lysine N-methyltransferase ATXR6-like [Glycine max]	12.7556	12.5509	7.25584	15.1191	13.1886	10.5247	2.41012	4.83025	7.2356	4.452	4.70785	5.22431	3.72813	2.77892	2.78238	54.9541	63.5029	74.649	3.95435	6.28765	5.62366
XLOC_024384	polyubiquitin protein [Helianthus annuus]	2.44146	4.30018	4.20104	3.58521	3.4625	2.73925	0	0.822389	1.51741	1.76021	3.78919	4.05791	4.57738	33.4673	34.5766	14.1188	4.84816	6.87877	157.69	6.88696	8.68691
XLOC_057457	VP1/ABI3 family regulatory protein-like protein [Oryza sativa Japonica Group]	9.4982	8.02219	9.29665	7.12533	6.56139	8.84108	2.09623	1.32437	3.05103	14.336	15.5726	16.0267	13.6919	9.47838	5.57915	0	0.460296	0	7.66717	4.95477	6.50898
XLOC_049645	hypothetical protein SORBIDRAFT_08g002045 [Sorghum bicolor] >gi|241942462|gb|EES15607.1| hypothetical protein SORBIDRAFT_08g002045 [Sorghum bicolor]	0.981336	2.7979	2.23994	0.472747	2.88846	1.98268	0	0.206963	0	0	0	0	0	0	0	0	0	0	0	0	0
XLOC_087851	Nudix hydrolase [Theobroma cacao]	17.5056	22.5098	33.2475	15.9023	16.7506	24.066	94.7461	19.2691	24.9926	44.6194	58.9595	85.5839	78.8963	121.192	77.2708	5.58565	4.82487	4.82964	8.75059	21.0025	28.5843
XLOC_021237	uncharacterized protein [Arabidopsis thaliana] >gi|332004094|gb|AED91477.1| uncharacterized protein AT5G09995 [Arabidopsis thaliana]	11.3635	13.0946	13.758	11.3233	14.9541	13.853	8.09375	11.2973	10.046	14.5861	18.6229	14.974	22.2915	19.7407	17.0952	20.5501	11.9306	11.9757	9.01411	8.12725	10.6857
XLOC_060335	PREDICTED: cleft lip and palate transmembrane protein 1 homolog [Cicer arietinum]	36328.2	0	58395.7	0	15039.2	0	26045	6568.88	396.86	3487.86	3519.28	1635.6	3129.35	1246.67	21177.2	0	559.747	35818.8	286.313	759.157	1012.78
XLOC_001679	Os03g0184600 [Oryza sativa Japonica Group] >gi|255674259|dbj|BAH92018.1| Os03g0184600, partial [Oryza sativa Japonica Group]	2.94455	2.2836	4.15648	0.973808	1.84552	5.53054	41.8445	30.2373	0	0.921532	0	0	0	0	2.7829	0	4.71379	0	1.34247	0	4.55796
XLOC_075577	predicted protein [Populus trichocarpa] >gi|222845674|gb|EEE83221.1| predicted protein [Populus trichocarpa]	1.99752	2.89365	4.70363	4.4739	3.75481	4.28717	15.708	2.31714	3.3981	1.14643	3.16845	2.87019	2.66842	27.872	23.9059	47.722	35.0308	37.7431	2.10556	17.6932	8.17525
XLOC_072916	cationic amino acid transporter, putative [Ricinus communis] >gi|223548782|gb|EEF50271.1| cationic amino acid transporter, putative [Ricinus communis]	11.6617	10.1978	8.83263	8.35138	8.70484	9.19019	11.1275	15.8202	10.8358	15.6134	16.4774	19.1937	17.0102	23.77	29.308	2.2816	3.40931	3.63626	10.417	25.6783	39.9169
XLOC_025353	Protein penguin, putative [Ricinus communis] >gi|223544068|gb|EEF45594.1| Protein penguin, putative [Ricinus communis]	6.93674	8.08221	5.62709	8.89991	9.20794	6.25654	10.0758	9.88587	16.3929	38.2512	38.8388	37.692	23.0009	16.5953	15.5685	0	0	0	7.91719	17.8795	24.6592
XLOC_028643	hypothetical chloroplast RF19 (chloroplast) [Hemiphylacus alatostylus]	1760.62	826.784	1469.79	3623.13	0	977.948	0	0	0	436.29	858.518	1195.92	0	431.167	0	0	125.549	12133.4	70.0514	197.74	246.749
XLOC_069307	PREDICTED: uncharacterized protein LOC100246698 [Vitis vinifera]	13.8775	14.8727	6.30524	8.6632	11.501	10.9121	5.33109	2.68648	49.8822	39.7084	44.0063	56.5171	35.8077	12.7032	7.02597	8.29879	7.26506	6.46818	33.6835	23.3159	26.1818
XLOC_046985	hypothetical protein VITISV_004537 [Vitis vinifera]	12.8056	9.74098	9.56266	15.5539	9.96444	13.307	16.3419	7.27794	12.2316	6.20236	7.18274	6.4603	4.91762	5.98256	11.3915	98.0566	92.6731	82.6009	31.1122	22.6533	19.1819
XLOC_018072	PREDICTED: protein LURP-one-related 5-like [Setaria italica]	17.3731	14.3809	13.919	18.2232	18.5326	19.6911	34.7768	19.0475	14.7128	7.21714	5.24093	6.64203	2.21978	29.5225	28.7576	1.90964	1.88581	1.09007	22.8685	21.1301	12.1952
XLOC_086749	predicted protein [Hordeum vulgare subsp. vulgare]	0.177031	0.181352	0	0.506149	0.467512	0.651382	9.46655	7.46314	6.33511	3.43469	2.6703	3.53188	2.04663	0.89552	0.52932	2.74691	1.24605	0	3.29861	7.98154	10.6765
XLOC_072880	hypothetical protein ZEAMMB73_341531 [Zea mays]	1.06779	1.42242	5.32548	2.56496	1.9124	1.78024	14.6946	32.6716	4.59347	10.3835	7.93197	12.9448	12.1271	0.785373	8.09819	17.0273	0	17.7983	39.5024	40.3169	47.0744
XLOC_091947	PREDICTED: UDP-N-acetylglucosamine/UDP-glucose/GDP-mannose transporter-like [Cucumis sativus] >gi|449520181|ref|XP_004167112.1| PREDICTED: UDP-N-acetylglucosamine/UDP-glucose/GDP-mannose transporter-like [Cucumis sativus]	1.40155	2.20275	4.27548	2.6634	1.87045	2.34464	0	2.51908	0.678562	2.16314	2.40596	1.90896	1.42649	3.65006	1.12747	14.4069	6.09775	2.25551	2.86831	27.3822	4.97316
XLOC_073600	unnamed protein product [Vitis vinifera]	18.4968	23.097	24.7147	21.8824	20.6622	26.4282	12.8944	9.31415	17.3308	17.3714	18.6021	20.6111	21.7883	31.3712	40.368	9.99303	7.82278	15.0011	7.73602	15.1989	22.0659
XLOC_011739	Developmental regulator, ULTRAPETALA [Theobroma cacao]	0	0	0	0	0	0	1.87626	2.44184	0	0	0.110023	0	0	0	0	0	0	1.85912	0.119875	0	0
XLOC_064761	MADS box transcription factor [Phalaenopsis equestris]	0	0	0	0	0	0	0	0	0	0	0	0	0	0	0	0	0	2.21209	316.117	3.57315	1.43627
XLOC_017169	PREDICTED: leucine-rich repeat receptor protein kinase EXS-like [Vitis vinifera]	0.211172	0.519084	0.726569	0.507685	0.606365	0.503192	0.568928	0.65475	1.80972	0.661415	0.93561	0.962819	1.24188	3.19255	2.09467	2.1384	1.22194	1.41839	1.81286	2.19186	2.6681
XLOC_060836	Os08g0510300 [Oryza sativa Japonica Group] >gi|75149039|sp|Q84YJ9.1|HAK26_ORYSJ RecName: Full=Potassium transporter 26; AltName: Full=OsHAK26 >gi|28411869|dbj|BAC57399.1| putative high-affinity potassium transporter [Oryza sativa Japonica Group] >gi|113624174|dbj|BAF24119.1| Os08g0510300 [Oryza sati...	0	0	0	0.26044	0	0	1.06269	2.87621	0	0	0	0	0	0	0	0	0	0	0	0.614969	1.33301
XLOC_090121	putative histone deacetylase complex, SIN3 component [Physcomitrella patens subsp. patens] >gi|162674118|gb|EDQ60631.1| putative histone deacetylase complex, SIN3 component [Physcomitrella patens subsp. patens]	15.8145	15.9839	19.9935	16.7575	16.9339	14.6443	13.2742	11.4752	65.0378	85.737	85.7626	76.3968	138.534	65.4301	72.87	27.5575	31.0762	36.3512	262.183	16.0594	19.7919
XLOC_080548	PREDICTED: pentatricopeptide repeat-containing protein At2g30100, chloroplastic [Vitis vinifera]	1.96033	1.59971	2.36243	1.99315	2.00137	1.89337	7.57157	2.6228	0.0775633	0.998491	0.827079	0.544877	0.83352	2.36635	1.14087	2.63682	4.12907	2.06947	0.543086	0.481891	0.99883
XLOC_027745	PREDICTED: phosphatase IMPL1, chloroplastic-like, partial [Cucumis sativus]	0	0	0	0	0	0	0	258.861	0	0	0	0	0	0	0	0	0	0	0	0	0
XLOC_040271	hypothetical protein PRUPE_ppa019627mg, partial [Prunus persica]	5.71736	4.8737	5.77987	4.10105	7.63803	5.30868	8.39264	4.73481	1.38725	4.66179	7.96971	7.72592	8.93481	7.26168	6.06821	0	0	1.24963	4.59992	6.11213	4.56685
XLOC_004797	predicted protein [Hordeum vulgare subsp. vulgare]	0	0	0	0	0	0	0	0	6.89655	0	0	0	0	0.465022	1.14455	1.48549	1.73036	2.68592	0	17.1658	0.544769
XLOC_042090	PREDICTED: uncharacterized protein LOC101252412 [Solanum lycopersicum]	19.5227	21.6293	19.3513	18.0316	17.6688	19.8075	12.7739	10.635	36.6813	38.6578	41.9264	44.9033	41.3271	44.0033	30.8477	10.5898	7.99234	9.29842	12.9799	36.9296	44.6025
XLOC_013205	hypothetical protein TRIUR3_31639 [Triticum urartu]	59.9848	62.0983	84.14	104.901	57.2605	88.337	32.788	31.3149	8.69742	18.2257	18.7178	16.6718	13.9187	17.7526	1.76705	19.1493	0	16.3657	0	2.69146	0
XLOC_029972	PREDICTED: putative serine/threonine-protein kinase-like protein CCR3-like [Glycine max]	0.221792	0.36936	0.111893	0.20807	0.249573	0.224178	0.380893	0.942345	0.171538	0.333632	0.205865	0.0140415	0.0775511	0.598719	0.956452	0	0	0	2.13525	0.865894	2.16069
XLOC_028801	Uncharacterized protein TCM_033752 [Theobroma cacao]	0.335137	0.387039	0.760029	0.397272	0.831455	0.640532	1.41071	0.656998	1.22045	1.16413	1.20269	1.22964	2.13018	1.06481	1.15191	0	1.35017	0	0.344195	0.0708837	0.145518
XLOC_010256	predicted protein [Populus trichocarpa] >gi|222841713|gb|EEE79260.1| predicted protein [Populus trichocarpa]	94.7789	80.0785	82.1764	92.7822	73.6908	76.4265	41.2542	13.9031	34.405	46.9957	43.0912	57.5935	40.6811	27.4201	54.3946	1.78593	0	2.81909	27.0976	20.7955	28.5493
XLOC_017165	Serine/threonine-protein kinase BRI1-like protein 2 [Aegilops tauschii]	1.0699	0.353062	0.320306	0.573933	0.622041	0.67196	1.06693	0.305857	4.74971	8.20235	3.28057	4.73381	3.82319	2.7712	0.685255	0.539992	7.56e-05	1.25376	0.424955	2.02193	1.83158
XLOC_079015	PREDICTED: ribosome biogenesis regulatory protein homolog [Vitis vinifera] >gi|296088996|emb|CBI38699.3| unnamed protein product [Vitis vinifera]	104.93	84.7924	79.4199	93.7659	84.5181	93.9091	49.1504	38.1515	59.9756	94.1421	94.4922	104.571	75.9275	97.4042	49.2295	53.8542	35.3298	50.0408	32.9382	45.2984	45.6736
XLOC_093147	unnamed protein product [Vitis vinifera]	1.335	0.826674	0.588435	1.26743	0.786618	0	2.69645	2.40376	1.313	5.34358	5.32251	8.3314	3.67875	2.02761	0.279475	1.9054	0	2.99078	1.90415	0.552465	0.793156
XLOC_068294	predicted protein [Hordeum vulgare subsp. vulgare]	0.650398	0.710763	0.36697	0.523215	0.382172	0.406582	0.085941	0.507426	0	0	0.0386639	0.147627	0	0.0578041	0	0.790036	0	0	1.01675	0.172444	0.205229
XLOC_072503	Acetyl-CoA carboxylase 1 isoform 2 [Theobroma cacao]	2.33203	2.42971	2.5803	1.84826	1.73691	2.77661	2.84705	1.74013	4.58277	4.57977	2.94947	6.02193	3.23439	5.64307	14.4564	0	0	0	1.05966	1.91164	1.48487
XLOC_062679	PRESSED FLOWER a [Juncus wallichianus]	2.32011	1.22676	3.85909	1.58843	1.66989	2.14581	0	0.0945798	0	0	0	0.0298109	0.306176	0	0	0	0	0	0	9.33e-06	8.16e-06
XLOC_044593	Os01g0815900 [Oryza sativa Japonica Group] >gi|56785064|dbj|BAD82703.1| pentatricopeptide (PPR) repeat-containing protein-like [Oryza sativa Japonica Group] >gi|255673814|dbj|BAF06530.2| Os01g0815900 [Oryza sativa Japonica Group]	1.28614	0.857008	0.759729	1.57439	0.358326	0.222526	5.78e-05	0.00235193	1.90526	1.74724	1.29574	2.07707	0.270665	1.51012	0.372697	5.54e-05	0.696119	0	0.88221	0.480677	0.0399323
XLOC_011504	PREDICTED: B3 domain-containing protein Os12g0592300-like [Setaria italica]	524.952	362.217	233.423	496.793	437.882	318.795	8.66572	6.73884	37.1873	105.178	186.128	103.334	44.4875	0	0	0	0	0	1.9445	0	0
XLOC_049898	PREDICTED: uncharacterized protein LOC100251036 [Vitis vinifera]	0.172523	0.341946	0	0	0	0.238725	3.51832	0.905161	0	0.66988	0.230626	0.637432	0.187811	1.48842	1.44172	1.40197	2.6976	0	0.204692	4.08767	1.95815
XLOC_017483	PREDICTED: pentatricopeptide repeat-containing protein At2g33680 [Vitis vinifera] >gi|302141693|emb|CBI18896.3| unnamed protein product [Vitis vinifera]	0.0586255	0.167289	0.154451	0.171175	0	0.29194	0.25582	0.0867677	0	0	0	0	0	0	0	0.382507	8.69e-06	0	0	0	3.34e-05
XLOC_087353	predicted protein [Physcomitrella patens subsp. patens] >gi|162667303|gb|EDQ53936.1| predicted protein [Physcomitrella patens subsp. patens]	25.6855	33.8306	21.4724	35.2072	28.9913	26.5443	128.218	58.5724	33.712	22.5669	13.7814	19.9976	21.9414	125.209	187.997	702.124	832.932	897.565	425.899	133.149	136.761
XLOC_086255	unnamed protein product [Vitis vinifera]	2.5111	2.76903	3.0473	2.63778	2.64988	2.72221	3.36724	2.04817	1.08595	1.09605	1.20831	1.77354	1.23168	0.781905	1.39176	0.88074	0.922032	0.199635	1.44209	0.77811	0.623044
XLOC_043229	PREDICTED: uncharacterized protein LOC101764058 isoform X1 [Setaria italica]	2.90476	2.34469	1.55526	1.1766	1.67665	2.74729	0.714561	0.292727	14.6272	15.8749	10.7903	16.3911	12.162	3.74025	1.25123	0	1.14671	1.8895	9.48809	5.10492	7.35709
XLOC_003056	homeobox protein knotted-1, putative [Ricinus communis] >gi|223550728|gb|EEF52214.1| homeobox protein knotted-1, putative [Ricinus communis]	0.886119	0.571979	1.63217	0	0.114766	1.26728	0.177739	0	0	0.169377	0.177921	0.0863491	0.528264	0	0	0	0	0	0	0	0
XLOC_038618	GNS1/SUR4 membrane protein family [Theobroma cacao]	0.650024	0.441507	2.21698	0.88195	0.816543	1.9147	2.78789	0.64449	0	0	0	0	0	0	0	3.92828	1.96414	4.0299	3.3182	0.973887	0.988619
XLOC_017496	TPA: putative subtilase family protein [Zea mays]	0.361505	0.498462	0.63877	0.442144	0.419838	0.65406	0	0.0919798	0	0.0370911	0	0	0	0	0	0	0	0	0.043446	0.0411052	0.193157
XLOC_008880	Os01g0182900 [Oryza sativa Japonica Group] >gi|55295917|dbj|BAD67785.1| unknown protein [Oryza sativa Japonica Group] >gi|255672945|dbj|BAF04136.2| Os01g0182900 [Oryza sativa Japonica Group]	9.64157	7.263	7.84986	13.4586	8.59412	11.1687	16.6526	12.7143	11.6471	19.755	18.3984	17.434	16.9598	23.1288	21.998	19.7931	16.4	25.2734	20.4474	13.1129	16.2137
XLOC_004057	NADH dehydrogenase subunit 5 [Maranta leuconeura]	0	0	0	0	0	0	0	0	0	0	0	0	0	0	0	0	0	0	0	62.4947	350.658
XLOC_000599	Glyoxalase 2-4 [Theobroma cacao]	11.1684	16.6939	13.3655	15.202	16.5923	15.4241	17.2457	9.5574	19.2853	15.5916	17.1839	17.808	16.866	47.2974	43.4929	21.3359	19.8259	19.4787	16.6544	17.4749	21.9228
XLOC_066106	unknown [Picea sitchensis]	97.7829	166.821	114.034	72.3358	117.856	150.652	25.918	3.63347	19.1837	23.2441	17.7388	17.3027	23.8352	3.46004	17.9586	35.3309	37.4119	49.6664	47.5292	6.89718	11.29
XLOC_044158	putative cyclic nucleotide-gated cation channel [Sandersonia aurantiaca]	7.46663	7.63653	3.59186	8.98288	6.81456	4.56915	1.00916	0	0	0.314522	0.65451	0	0.801826	0	0.524369	0	0	0	0.826406	0	0
XLOC_047159	PREDICTED: uncharacterized protein LOC101314295 [Fragaria vesca subsp. vesca]	2.54009	4.16247	2.67018	1.68646	2.40453	2.4332	0.443811	0.0691373	0	0.0696986	0	0	0.213323	0	0	0	1.51027	0	0.0599386	0	0.0523175
XLOC_081580	PREDICTED: ubiquitin-conjugating enzyme E2-17 kDa-like isoform 2 [Glycine max]	0	0	0	0	0	0	0	0	0	2.80854	14.633	0	2.93471	2.72432	0	6.37388	0	4.83583	2.70307	1.67314	0
XLOC_021168	PREDICTED: UDP-N-acetylglucosamine--N-acetylmuramyl-(pentapeptide) pyrophosphoryl-undecaprenol N-acetylglucosamine transferase-like [Vitis vinifera]	1.0753	1.25533	0.251565	1.02091	0.337423	0.613715	0.057534	0.338664	2.6988	0.0104063	0.257497	0.0656425	0.288627	0.0411502	0	0.613096	0	0	0.159957	0.161499	0.182135
XLOC_075389	PREDICTED: translation initiation factor IF-3 [Vitis vinifera] >gi|297743667|emb|CBI36550.3| unnamed protein product [Vitis vinifera]	19.3943	30.6891	32.2282	20.4051	30.0756	30.2773	111.243	46.1465	22.3996	20.2912	23.2268	20.6101	26.9861	114.724	172.258	69.201	85.9515	82.5339	44.8934	32.6953	35.8715
XLOC_090491	PREDICTED: uncharacterized protein LOC101771232 isoform X3 [Setaria italica]	1.47635	0	0	0	5.84e-05	0.16171	0	0.171135	0	0	6.60163	0	0	0	0	0	0	0	36.6819	1.41515	1.45985
XLOC_028020	PREDICTED: translation initiation factor eIF-2B subunit alpha-like [Vitis vinifera]	14.9446	15.8465	16.7235	14.5119	16.6703	15.7252	14.7191	10.9658	4.90082	10.0045	8.48677	12.2333	10.2645	11.6347	5.953	1.86835	0	3.73596	5.66271	11.7153	9.59387
XLOC_069187	ATP binding protein, putative [Ricinus communis] >gi|223540524|gb|EEF42091.1| ATP binding protein, putative [Ricinus communis]	19.1398	18.4918	23.7418	21.7047	17.7426	19.5481	19.0085	28.6823	21.1895	21.6837	27.5306	30.4488	27.4062	16.3698	21.7151	2.39022	4.08598	3.26203	6.24352	13.5135	18.6878
XLOC_006439	unnamed protein product [Vitis vinifera]	3.28884	3.72003	2.56198	1.78129	2.72355	2.71538	0.227961	0.109248	7.3862	7.17876	7.2374	6.27314	5.63259	0.374874	0.173767	0.471423	0.706915	1.25159	1.76616	1.4571	1.3784
XLOC_080111	PREDICTED: pathogenesis-related genes transcriptional activator PTI6-like [Fragaria vesca subsp. vesca]	2.30373	3.21358	2.22984	3.557	2.53541	2.36065	0.727233	0.980208	0.0501576	0.469131	0.287955	0.356141	0.950298	0.131842	0.680643	0.885099	0	0.386975	0.455054	0.0508786	0.0662237
XLOC_062218	hypothetical protein M569_10445, partial [Genlisea aurea]	15.0941	16.1803	19.2094	12.0984	15.4594	19.7456	32.73	4.38258	9.38355	14.7771	16.337	10.6143	6.33059	35.498	10.7491	1.26057	0	0	3.54423	11.8217	12.3291
XLOC_063727	PREDICTED: uncharacterized protein LOC101785245 [Setaria italica]	1.65818	0.548637	5.34044	2.14427	1.93377	1.4127	23.2505	2.97887	0.613131	3.1905	1.81354	3.16267	4.43793	13.5067	11.6591	4.82573	0	14.6117	117.392	12.2212	16.9875
XLOC_022701	PREDICTED: kinesin-like protein KIF22-like [Solanum lycopersicum]	28.5632	56.9853	24.1394	72.6716	40.1279	48.0371	1.38665	5.91531	8.93471	5.44735	9.37497	8.83199	1.59811	0	0	7.96546	0	3.34841	3.13197	1.04946	2.83286
XLOC_090781	receptor-like protein kinase, partial [Elaeis guineensis]	7.90338	5.8173	7.39722	9.4417	13.0276	6.43195	0.459202	0.700703	0.12912	0.814857	0.53491	0.559905	0.408596	0	0.0446379	0.287118	0	0.444646	1.65373	3.29477	2.84279
XLOC_005055	TPA: glutathione reductase1 [Zea mays]	197.414	292.924	319.761	290.965	236.133	256.599	30.897	74.8716	98.473	214.195	502.859	435.88	182.168	368.406	305.945	182.697	243.596	262.766	77.9923	122.559	117.473
XLOC_065669	hypothetical protein CARUB_v10003017mg [Capsella rubella]	0.0165233	0	0.0702871	0.0631034	0	0	0.892553	0.122443	0	0.0337799	0	0.0649835	0.0477206	0.1684	0.103013	0	0	0.293048	0.188957	0	0
XLOC_076803	PREDICTED: uncharacterized protein LOC100852661 [Vitis vinifera]	5.84519	4.30883	7.18389	6.63688	4.17389	3.78006	2.36363	1.92749	6.90118	8.70557	8.46897	8.28618	6.74075	5.67235	4.61454	0	0.681274	0	3.80826	3.47329	3.17586
XLOC_001624	PREDICTED: apoptosis-inducing factor homolog A-like [Glycine max]	0	0	0	0	0	0	0	0	0	0	0	0	0	0	0	0	0	0	0	0	16.3807
XLOC_010923	PREDICTED: uncharacterized protein LOC100854867 [Vitis vinifera]	14.3283	11.0924	20.5053	14.5036	17.3007	12.4408	39.9833	13.7648	12.8658	51.8772	59.302	59.701	48.9497	42.5322	53.6209	64.0782	31.2399	70.3176	18.4504	16.8673	22.7588
XLOC_077770	predicted protein [Hordeum vulgare subsp. vulgare]	22.5941	21.3824	23.0782	21.8771	16.7251	28.1701	54.9527	32.0575	0	0	0.357428	0	0.309381	0.328743	0	0	1.23672	0	19.6785	0	0.545306
XLOC_014951	hypothetical protein PRUPE_ppa002712mg [Prunus persica]	3.8673	3.31838	3.1469	2.69881	1.74791	4.20354	11.0768	7.05943	11.1912	8.66046	11.3324	17.4452	14.586	10.0485	12.0875	9.84504	17.7211	16.3086	23.9604	8.09754	11.9054
XLOC_078414	serine carboxypeptidase, putative [Ricinus communis] >gi|223550777|gb|EEF52263.1| serine carboxypeptidase, putative [Ricinus communis]	442.079	634.406	640.876	581.389	534.353	673.834	15.5955	60.8769	278.669	191.148	298.806	212.727	131.955	7.80892	20.2851	71.5074	60.4697	56.1907	106.289	89.6563	89.4653
XLOC_019782	PREDICTED: uncharacterized protein LOC100262534 [Vitis vinifera] >gi|297739463|emb|CBI29645.3| unnamed protein product [Vitis vinifera]	2.11579	1.71784	4.02333	2.95355	2.98232	2.56464	18.2879	8.5367	0	0.529746	0.695835	0.667875	0.465992	3.95572	7.97823	5.8466	8.40204	5.09216	4.1269	3.3334	3.91626
XLOC_077213	hypothetical protein OsI_38371 [Oryza sativa Indica Group]	3.86015	3.98338	3.2907	4.60519	3.4594	3.95994	1.18547	1.36122	0.644433	0.410895	0.400424	0.420778	0.278887	0.238429	0.082867	0	0	0	0.0993891	0	0.0495816
XLOC_016519	PREDICTED: uncharacterized protein LOC101314740 [Fragaria vesca subsp. vesca]	7.70712	8.94932	0	7.93267	7.00009	24.6129	0	0	0	0	0	0	13.0031	0	0	16.058	48.1739	88.0652	36.8049	1.40507	0.690622
XLOC_026149	Os06g0705100 [Oryza sativa Japonica Group] >gi|53792766|dbj|BAD53801.1| putative thylakoid lumenal 16.5 kDa protein, chloroplast precursor [Oryza sativa Japonica Group] >gi|113596554|dbj|BAF20428.1| Os06g0705100 [Oryza sativa Japonica Group] >gi|215686385|dbj|BAG87646.1| unnamed protein product [Ory...	12.9874	10.7315	12.7454	7.55251	9.47869	14.3796	52.4621	18.699	4.3466	3.47901	2.58946	3.22941	3.36156	27.3768	47.1936	20.8721	11.6602	18.5016	9.13868	5.7471	8.00627
XLOC_042257	hypothetical protein PRUPE_ppa010958mg [Prunus persica]	17.9076	20.7215	31.2254	26.4841	15.6383	27.0025	3.09919	0	2.2841	2.90575	2.69646	2.33187	0.713728	4.47464	220.391	0	0	0	142.629	23.3963	23.6161
XLOC_092221	sesquiterpene synthase [Elaeis oleifera]	0	0	0	0.0295164	0	0	1.50172	0.407058	0	0	0	0	0	0	0	0.700048	0.464935	0.355269	0	8.75284	10.308
XLOC_033513	hypothetical protein SORBIDRAFT_01g017910 [Sorghum bicolor] >gi|241920839|gb|EER93983.1| hypothetical protein SORBIDRAFT_01g017910 [Sorghum bicolor]	0	0	0	0	0.209464	0.175844	0.350225	0.171955	0	0	0	0	0	0.224072	0	20.3134	23.699	16.6457	16.9836	3.99921	5.70279
XLOC_059581	predicted protein [Populus trichocarpa] >gi|222833707|gb|EEE72184.1| predicted protein [Populus trichocarpa]	0	0	0	0	0	0	0.360684	0.352372	0	0.489605	0.682233	2.30728	0.87299	1.38385	0	1.73235	0	0	1.6017	5.91164	6.70801
XLOC_091175	PREDICTED: uncharacterized ATP-dependent helicase C23E6.02-like [Vitis vinifera]	18.7703	16.9516	18.4368	20.4876	18.1143	15.1123	8.80101	8.40616	10.721	20.0348	18.7808	18.5202	19.4927	12.0844	10.4855	5.05526	4.53969	7.81123	6.93426	12.7501	12.709
XLOC_001302	Benzoate carboxyl methyltransferase [Aegilops tauschii]	0	0	0	0	0	0	23.2445	50.3861	0	0	0	0	0	0	0	0	0	0	0	0	0
XLOC_036922	hypothetical protein OsI_18850 [Oryza sativa Indica Group]	95.0083	57.8112	55.1152	69.1702	54.4487	55.1308	66.4586	24.6262	27.6052	41.9319	34.0831	45.4002	35.0774	49.8933	40.9407	63.5778	52.6746	39.0138	13.0968	16.5679	25.4371
XLOC_068824	PREDICTED: cytochrome b-c1 complex subunit Rieske, mitochondrial-like [Setaria italica]	0.0535917	0	0.116621	0	0	0.142779	4.58658	4.88885	0	0.12291	0.754721	0.120553	0.328606	0.0872727	0	0	0	0	0.141934	0.196964	0
XLOC_009033	NAD-dependent malate dehydrogenase [Prunus persica]	31.22	35.7797	36.5413	27.7726	34.2281	28.9305	147.479	120.3	0.0335705	0.888176	0.945053	1.38658	1.68629	2.47603	2.89065	0.534864	0.542418	1.23794	18.3058	0.171009	2.74339
XLOC_023039	unnamed protein product [Vitis vinifera]	4.60968	4.965	5.35298	6.27752	5.82567	4.78395	3.61764	4.04795	0.0655335	1.15488	1.13142	1.06453	1.32786	0.134601	0.0668636	1.63628	0.649583	1.44381	1.8348	0.485764	0.400026
XLOC_091420	PREDICTED: uncharacterized protein LOC101313593 [Fragaria vesca subsp. vesca]	1.37811	1.13173	2.26759	0.898973	1.22531	2.18253	3.07797	2.22117	10.0362	2.13555	1.8592	3.11807	2.9588	0.226001	0.587289	0	0	0	0.531182	0.110753	0.389065
XLOC_046144	At2g34960/F19I3.19 [Arabidopsis thaliana] >gi|23308439|gb|AAN18189.1| At2g34960/F19I3.19 [Arabidopsis thaliana]	0.326936	0	0	0	0	0	2.02574	1.15747	0	0.478483	0	0	0	0	0.561078	0	0	0	0.439643	0.632962	15.9135
XLOC_030456	PREDICTED: E3 ubiquitin-protein ligase ORTHRUS 2-like [Vitis vinifera]	16.8313	10.0619	5.45917	14.0332	10.6281	11.0464	0.541126	1.2626	14.2292	6.66515	6.66576	5.80852	3.93954	0.965619	0.633239	1.94626	2.02133	2.18656	5.46118	5.17087	7.55949
XLOC_024609	LOC542653 [Zea mays] >gi|28950670|gb|AAO63267.1| legumin-like protein [Zea mays] >gi|413942236|gb|AFW74885.1| putative rmlC-like cupins superfamily protein [Zea mays]	0	0.623362	0	0.479891	0	0	8.94579	2.73066	0	15.004	10.1912	7.685	15.9992	6.42333	6.91271	24.3468	17.2869	38.039	32.6594	0	0
XLOC_014100	PREDICTED: G-type lectin S-receptor-like serine/threonine-protein kinase At2g19130 isoform 1 [Vitis vinifera]	17.7492	18.2882	24.6659	22.6937	17.2885	18.5014	21.2973	9.67119	9.88435	10.9331	9.88363	11.0029	7.59104	2.60831	0.796984	2.604	2.604	0.991195	3.60895	10.1393	6.62856
XLOC_035977	PREDICTED: uncharacterized protein LOC101214651 [Cucumis sativus] >gi|449522484|ref|XP_004168256.1| PREDICTED: uncharacterized LOC101214651 [Cucumis sativus]	16.5485	15.6848	10.8397	14.2364	12.5023	11.25	1.7024	1.20722	6.39502	8.7478	6.40695	8.52289	5.45575	1.30966	1.00854	12.9722	9.88117	14.9169	3.85148	2.55849	4.31631
XLOC_031083	hypothetical protein OsI_17428 [Oryza sativa Indica Group]	2.68024	1.8846	2.23571	2.06118	2.9211	2.50699	4.06766	1.84628	9.82792	5.13338	5.3745	5.82174	13.7176	9.47303	15.056	1.97e-05	2.38109	0.781829	5.27504	4.08952	7.37738
XLOC_001303	TPA: hypothetical protein ZEAMMB73_952186 [Zea mays]	48.6725	86.7119	74.5424	60.6299	62.3835	56.7022	60.0481	53.6132	50.2004	93.5909	109.829	89.3849	78.1063	74.4713	60.1314	23.097	18.3204	22.1767	40.4221	73.7078	49.6336
XLOC_031634	PREDICTED: uncharacterized protein LOC101786216 [Setaria italica]	11.8196	10.4486	9.31859	10.5681	9.48498	12.4341	39.5457	19.5341	0	0	0	0	0	0	0	0	0	0	0	0	0
XLOC_062556	hypothetical protein PRUPE_ppa017672mg [Prunus persica]	2.55645	2.15443	2.04444	3.05281	2.63505	2.58636	1.66226	1.1695	1.18709	3.57135	4.02372	4.14096	3.65527	2.42792	1.6532	0.293872	0.148876	0.329921	1.96538	1.34239	2.07447
XLOC_017700	hypothetical protein VITISV_043723 [Vitis vinifera]	11.222	10.5638	9.06016	11.2447	9.61953	11.2022	11.5731	8.70248	23.7883	25.8178	25.8284	26.3749	25.0069	12.6609	12.7239	5.51317	3.86314	4.986	13.0864	12.9975	13.8383
XLOC_000180	Nucleic acid binding,zinc ion binding,DNA binding, putative isoform 2 [Theobroma cacao]	4.20636	4.03289	3.58394	4.78836	4.47999	3.77946	8.3013	3.6768	0	0	0.0181485	0	0.0159416	0	0	0.233462	0	0	0	0	0.0193845
XLOC_017865	unknown protein [Oryza sativa Japonica Group] >gi|33146932|dbj|BAC79966.1| unknown protein [Oryza sativa Japonica Group]	73.4485	72.938	67.3439	65.2177	76.1161	80.8143	38.5025	44.0312	22.1145	52.1277	54.2734	47.4637	53.8933	29.0212	31.0066	15.4864	8.77939	9.99695	79.4263	1.35831	7.5717
XLOC_053274	metalloprotease m41 ftsh, putative [Ricinus communis] >gi|223538806|gb|EEF40406.1| metalloprotease m41 ftsh, putative [Ricinus communis]	459.787	634.78	616.427	771.187	217.897	574.627	341.27	87.2187	20.0643	807.253	1338.96	1289.26	192.18	328.43	343.985	20.7647	62.2941	739.747	90.4645	65.4088	77.2891
XLOC_064918	PREDICTED: ABC transporter G family member 36-like [Fragaria vesca subsp. vesca]	8.79445	9.80354	8.98244	8.51409	7.81034	4.92139	0	0.399042	6.68448	23.1642	12.553	19.4437	16.9666	6.42751	2.54174	2.25847	4.78615	0	4.76083	0.377122	1.03795
XLOC_091052	hypothetical protein SORBIDRAFT_0019s004400 [Sorghum bicolor] >gi|241947244|gb|EES20389.1| hypothetical protein SORBIDRAFT_0019s004400 [Sorghum bicolor]	64.4671	52.2086	50.6232	80.4093	70.3087	52.639	4.73481	15.1613	23.5462	12.2696	12.4101	15.464	14.2774	1.3472	0.984507	2.86915	3.99424	3.63833	13.7183	10.0674	13.5151
XLOC_090030	PREDICTED: two-component response regulator ARR16-like [Fragaria vesca subsp. vesca]	0	0	0	0.176349	0	0	2.05473	1.53997	0	0	0.155321	0	0.130061	0.450337	0	0	0	0	0.292665	0	0.511696
XLOC_082498	Os05g0557600 [Oryza sativa Japonica Group] >gi|49328017|gb|AAT58718.1| putative ubiquitin-conjugating enzyme [Oryza sativa Japonica Group] >gi|113579841|dbj|BAF18204.1| Os05g0557600 [Oryza sativa Japonica Group] >gi|222632521|gb|EEE64653.1| hypothetical protein OsJ_19507 [Oryza sativa Japonica Group...	2.44908	3.60602	3.33182	3.18751	3.2628	3.14822	2.8878	4.07738	3.7941	3.82993	3.05967	3.81821	3.63083	3.97314	3.67337	9.48519	6.46242	8.63524	15.5768	2.18923	2.85413
XLOC_072611	uncharacterized protein LOC100191423 [Zea mays] >gi|195612420|gb|ACG28040.1| deoxyribodipyrimidine photolyase family protein [Zea mays] >gi|414886442|tpg|DAA62456.1| TPA: deoxyribodipyrimidine photolyase family protein [Zea mays]	2.25306	2.29786	2.94141	2.38779	0.769343	3.1158	2.12022	0	15.3995	36.377	37.3178	12.9163	13.3742	78.7242	17.7678	0	0	0	4.54391	19.0398	5.78739
XLOC_034193	TPA: putative phytosulfokine receptor (LRR repeat-containing protein kinase) family protein [Zea mays]	1.18873	1.67041	1.39278	0.878237	1.14358	1.59139	1.83557	0.863147	10.5292	5.65574	3.62884	4.77095	6.19779	1.05179	0.827162	0	1.08207	0	0.94646	0.473405	0.955083
XLOC_044941	dwarf plant9 [Zea mays]	59.8288	54.2167	63.1646	72.1584	50.6428	48.12	301.174	62.3504	61.9293	58.8843	48.4942	38.2425	39.845	48.6656	76.9082	66.0337	52.8735	67.0517	96.8031	108.837	136.661
XLOC_071912	putative SPO11 protein [Oryza sativa Japonica Group]	1.42173	1.39217	1.836	0.730018	1.93804	1.52656	0.288546	0.13896	0	1.8648	3.17157	1.90983	3.5194	0.710106	3.42269	1.18459	1.17935	0.901652	4.12261	0.278414	0.196995
XLOC_067505	predicted protein [Populus trichocarpa] >gi|222842467|gb|EEE80014.1| predicted protein [Populus trichocarpa]	2.33255	5.20179	0	9.36066	4.12097	0	0	0	0	4.02509	8.23753	15.0059	0	0	9.68627	0	0	0	0	5.40654	6.37733
XLOC_047520	PREDICTED: F-box protein At2g32560-like [Glycine max]	7.7216	12.9629	27.7981	7.94976	8.41152	10.6843	88.2036	13.1342	7.58627	11.3033	10.3222	13.5587	21.7159	48.002	46.1873	32.9989	33.2697	68.8459	139.685	5.98986	9.48084
XLOC_027241	PREDICTED: H/ACA ribonucleoprotein complex subunit 4 [Vitis vinifera]	122.878	67.2421	47.1595	123.254	67.235	56.0633	25.6086	20.5463	53.5547	38.3976	39.4765	33.417	26.6261	30.6088	12.353	0	34.8683	8.01288	22.1996	38.2003	32.5783
XLOC_058663	hypothetical protein ZEAMMB73_342974, partial [Zea mays]	8.06483	9.07941	13.7813	10.3139	8.139	14.5205	1.43536	3.4146	14.6668	15.0361	12.4723	13.7027	12.4285	0.506873	1.91342	0.557676	1.19197	0.41111	14.9765	4.3949	6.86279
XLOC_062124	TPA: hypothetical protein ZEAMMB73_895629, partial [Zea mays] >gi|414871676|tpg|DAA50233.1| TPA: hypothetical protein ZEAMMB73_895629, partial [Zea mays] >gi|414871677|tpg|DAA50234.1| TPA: hypothetical protein ZEAMMB73_895629, partial [Zea mays]	12.5018	13.3655	11.4609	15.9806	12.6601	14.2268	8.6055	2.71224	52.6344	54.9843	46.0107	56.3937	42.8216	26.8277	14.2099	20.8705	16.6173	20.0575	33.1612	30.3954	31.7822
XLOC_056760	predicted protein [Populus trichocarpa] >gi|222867789|gb|EEF04920.1| predicted protein [Populus trichocarpa]	23.575	21.7063	19.5311	19.8811	30.3226	24.2815	22.7482	11.057	6.42189	10.2208	9.77705	11.5097	13.3351	0	0	0	0	0	3.53202	0	0
XLOC_054467	PREDICTED: alkylated DNA repair protein alkB homolog 8-like [Vitis vinifera]	1.98296	2.60769	2.16232	0.864412	2.17211	1.8214	6.87179	4.83948	0	0.250194	0.791595	0.999203	0	0.700776	0	0	0	0	0	0	0.114628
XLOC_037314	hypothetical protein PRUPE_ppa009145mg [Prunus persica]	59.3218	62.924	53.7231	56.0379	62.2794	53.8996	45.4037	42.081	27.4844	58.2067	67.9634	62.77	53.4293	57.1563	73.7662	96.5032	89.7375	96.3079	62.5416	87.2819	99.7148
XLOC_060588	PREDICTED: nitrate transporter 1.7-like isoform X2 [Setaria italica]	0.0917678	0	0.0995658	0	0.220062	0.0610313	6.42555	3.50412	0	0.156913	0.106858	0.255846	0.0932226	0	0	3.88417	3.23681	4.98141	0.425056	1.13288	1.03066
XLOC_036673	PREDICTED: uncharacterized protein LOC101783642, partial [Setaria italica]	0	0.362832	0	0.27369	0.299107	0.252551	3.13461	1.18449	0.202734	1.41535	0.500653	1.21679	0	0	0	0	0	0	0	0	0
XLOC_092395	mitochondrial aldehyde dehydrogenase [Miscanthus sinensis]	1.50923	1.39466	1.56471	1.74462	0.643781	1.09142	20.4967	10.7857	4.58957	6.1239	5.07475	6.83795	10.3419	11.2728	10.1465	6.14731	5.04748	2.82058	9.47336	4.38968	3.45379
XLOC_000313	Os02g0173900 [Oryza sativa Japonica Group] >gi|255670642|dbj|BAH91555.1| Os02g0173900, partial [Oryza sativa Japonica Group]	47.2204	56.1006	40.5981	46.4845	55.0171	40.553	109.517	234.64	23.4521	16.9648	24.9714	21.7618	20.5096	17.7407	25.4542	6.43533	1.27803	7.88591	19.4137	61.8864	100.555
XLOC_017787	mediator of RNA polymerase II transcription subunit 18 [Zea mays]	0	0	0	0	0	0	0	76.0553	0	0	0	0	0	25.6335	220.924	37.1332	35.9732	2467.65	0	70.7681	36.6697
XLOC_055147	Os03g0279700 [Oryza sativa Japonica Group] >gi|108707502|gb|ABF95297.1| zinc finger DNA-binding protein, putative, expressed [Oryza sativa Japonica Group] >gi|113548205|dbj|BAF11648.1| Os03g0279700 [Oryza sativa Japonica Group] >gi|125543343|gb|EAY89482.1| hypothetical protein OsI_11011 [Oryza sativ...	1.14232	0	0	0	0.946222	0	3.87192	1.77153	7.90213	0	1.4767	2.78556	0	5.65504	10.3344	0	0	0	0.73707	1.41887	1.15433
XLOC_081432	predicted protein [Populus trichocarpa] >gi|222861836|gb|EEE99378.1| predicted protein [Populus trichocarpa]	3.92433	5.81398	4.47533	3.09544	4.69989	4.04874	3.20409	4.35138	3.04449	0.693403	1.40623	1.31724	3.12191	0.412414	0	0	0	0	3.46064	0.386364	0.497122
XLOC_025827	unnamed protein product [Vitis vinifera]	4.25317	1.87673	11.0123	4.98244	5.52226	5.13496	3.97609	2.00199	1.86662	3.06703	13.1205	10.5822	20.0096	25.63	13.8509	30.0239	16.3977	31.5726	42.9049	7.95977	6.91705
XLOC_046931	unnamed protein product [Vitis vinifera]	2.72866	2.99041	1.43552	1.83694	1.5443	2.94306	6.62392	3.41917	2.11062	9.52639	7.4782	10.0224	9.5595	6.97497	2.52153	17.4879	2.57861	2.02532	4.92893	11.7468	14.7971
XLOC_081185	PREDICTED: LOW QUALITY PROTEIN: abhydrolase domain-containing protein 4-like [Solanum lycopersicum]	1.52581	0.751998	2.33956	0.968279	1.39367	1.97055	1.86631	2.66575	0.654493	0.828469	1.32452	1.27315	1.49813	3.17456	8.12895	0	0	0	2.68124	9.81724	2.4773
XLOC_061025	PREDICTED: arabinogalactan peptide 20 [Vitis vinifera] >gi|147812721|emb|CAN61749.1| hypothetical protein VITISV_014579 [Vitis vinifera] >gi|297745395|emb|CBI40475.3| unnamed protein product [Vitis vinifera]	0.274385	0	0	0.419118	0	0.392278	0	0.364283	0	0	0	0	0	0	0	0	0	0	0	0	0
XLOC_066045	PREDICTED: uncharacterized protein LOC101297313 isoform 1 [Fragaria vesca subsp. vesca]	0	0	0	0	1.76807	0	44.8504	34.3526	0.950469	5.52228	2.591	6.17312	2.73448	9.61975	3.27763	46.4976	67.1634	53.6055	1.39286	2.71245	0.368523
XLOC_065832	hypothetical chloroplast RF1 (chloroplast) [Cymbidium mannii] >gi|482662562|gb|AGK25784.1| hypothetical chloroplast RF1 (chloroplast) [Cymbidium mannii]	9.55247	13.0568	19.9169	17.5728	8.23749	11.6525	0.727575	2.6615	62.756	52.3402	95.8379	85.9649	93.9126	252.129	8.28926	15.6959	13.9519	26.3613	23.1356	34.6401	42.4777
XLOC_048390	Potassium transporter 1 isoform 1 [Theobroma cacao]	1.12788	0.987188	1.21598	2.14234	0.930432	0.888521	0	0	0	0.428593	0.320615	0.173089	1.05024	0.984096	0.594013	0	0	0	0.51888	0.119807	0.316582
XLOC_002903	PREDICTED: leucine-rich repeat protein SHOC-2-like [Vitis vinifera]	10.6279	10.7931	13.1611	13.0025	9.02448	8.85432	7.42508	3.43101	8.16068	6.16446	4.73294	3.64999	3.38978	7.61201	4.69061	1.19192	0	0	8.45863	7.17685	7.32752
XLOC_016495	hypothetical protein ARALYDRAFT_486071 [Arabidopsis lyrata subsp. lyrata] >gi|297322199|gb|EFH52620.1| hypothetical protein ARALYDRAFT_486071 [Arabidopsis lyrata subsp. lyrata]	39.4782	55.4593	43.0834	34.9995	44.8367	57.6688	112.739	22.8611	0	0	0	0	0.252238	3.38804	0	0	0	0	0.283175	0	1.04044
XLOC_052248	unnamed protein product [Vitis vinifera]	6.60308	4.93521	3.01874	6.7618	5.50876	3.28921	1.23603	1.13034	9.38414	11.7418	7.09169	8.59555	5.49434	7.25244	0	0	1.90389	0	4.66768	2.98671	0.94724
XLOC_031532	predicted protein [Populus trichocarpa] >gi|222836350|gb|EEE74757.1| predicted protein [Populus trichocarpa]	20.6324	26.6208	32.8399	27.9567	24.7597	27.4612	38.0843	24.0457	7.96599	15.7005	20.7499	21.6181	19.2666	28.4625	12.1617	4.31126	0.728318	1.0559	10.0946	5.26778	8.65811
XLOC_032479	PREDICTED: tRNA (guanine-N(7)-)-methyltransferase subunit WDR4-like [Glycine max]	1.61152	3.71509	1.17229	2.7543	1.78271	2.42415	5.71408	3.91335	3.8848	2.4477	3.91164	2.77427	2.34488	8.37551	1.63594	1.63794	1.07918	0	0.869668	2.55844	1.18071
XLOC_054360	PREDICTED: receptor-like protein kinase HSL1-like [Solanum lycopersicum]	2.79237	1.71872	0.884737	2.80009	1.77582	1.14137	1.68021	1.81202	0	0	0	0	0	0	0	0	0	0	0	0	0.214549
XLOC_031621	hypothetical protein OsI_19840 [Oryza sativa Indica Group]	16.2598	16.6706	11.3689	16.749	18.2878	16.1794	5.38838	9.02475	18.3687	12.1382	14.6178	14.5039	15.1858	15.733	14.033	1.82679	4.27238	1.94953	13.345	31.5362	19.2913
XLOC_006988	conserved hypothetical protein [Ricinus communis] >gi|223543877|gb|EEF45403.1| conserved hypothetical protein [Ricinus communis]	3.27522	2.59747	1.73881	3.09108	2.63898	3.31371	2.15788	1.28918	6.64402	5.97819	5.84256	6.05178	2.86696	3.24882	2.76145	0.357708	1.07944	0.811831	3.22654	15.8629	5.94154
XLOC_006852	hypothetical protein TRIUR3_06861 [Triticum urartu]	3.45108	2.75011	5.6955	3.79903	2.97786	2.75869	3.19117	4.00582	3.15086	7.26277	7.50028	6.48372	8.85251	8.84618	10.95	5.64839	3.7656	5.09879	11.6391	2.82812	6.31057
XLOC_082105	hypothetical protein TRIUR3_28361 [Triticum urartu]	0.24782	0.475238	1.27191	0.802738	0.927411	0.774619	7.46268	3.25509	0	0.290707	0.199784	0	0.0863688	0.137382	0	0	0	0	0.109648	0	0
XLOC_031727	large subunit of isopropylmalate dehydratase [Volvox carteri f. nagariensis] >gi|300260968|gb|EFJ45184.1| large subunit of isopropylmalate dehydratase [Volvox carteri f. nagariensis]	3.50173	2.83261	2.64788	2.76394	2.8106	3.28977	16.4303	27.9941	13.1327	11.257	9.9981	12.3167	18.8166	34.7248	58.8181	0	4.8776	3.92464	4.33341	11.1502	11.8643
XLOC_037020	PREDICTED: uncharacterized protein LOC100262519 [Vitis vinifera]	3.59322	2.86176	2.98828	4.73798	3.87914	1.80093	5.0006	1.66518	7.05389	10.1276	11.3128	12.7068	12.94	6.5903	0	0	0	0	0	0	0
XLOC_086153	Root hair defective 3 GTP-binding protein (RHD3) isoform 1 [Theobroma cacao]	45.3303	77.6787	87.2685	59.9915	56.2332	51.1975	1.62731	6.38601	0	29.1387	32.314	21.8284	15.6035	7.88769	9.16631	0	0	1.92259	6.08487	0.662845	2.38555
XLOC_076504	squalene synthase [Dioscorea zingiberensis]	29.3091	39.9479	27.6491	30.1369	34.7145	31.2169	10.8819	6.47015	7.13053	9.37727	10.0715	8.12619	11.8648	27.7901	69.8025	9.05547	9.36996	4.83262	8.18507	14.3426	18.6394
XLOC_093620	Os03g0330300 [Oryza sativa Japonica Group] >gi|108707956|gb|ABF95751.1| expressed protein [Oryza sativa Japonica Group] >gi|113548480|dbj|BAF11923.1| Os03g0330300 [Oryza sativa Japonica Group] >gi|222624863|gb|EEE58995.1| hypothetical protein OsJ_10708 [Oryza sativa Japonica Group]	9.65028	10.0034	11.2587	9.69949	9.43097	9.11647	7.48494	5.75185	40.7949	36.7164	41.954	41.7536	37.2683	24.059	28.6898	7.76026	4.45998	5.97272	12.6783	9.93322	15.4104
XLOC_078390	hypothetical protein CARUB_v10012721mg [Capsella rubella]	0.198098	0.365603	0.678518	0.42477	0.264621	0.77447	0	0.954587	0.184951	2.81454	1.44838	0	2.48757	0.563155	3.08e-05	12.0455	9.78537	2.47563	5.34204	0.564848	1.06392
XLOC_049808	PREDICTED: uncharacterized protein LOC100266005 [Vitis vinifera]	15.9537	14.0726	11.2823	17.6036	13.7819	9.67682	37.6937	15.1792	14.9016	5.53752	5.7852	6.24913	4.28708	2.96766	2.88862	0.812816	9.42931	0.904547	4.52192	6.47497	5.48532
XLOC_060100	hypothetical protein ZEAMMB73_582913 [Zea mays]	13.9663	7.63514	0	51.6267	18.1892	8.06909	6.15191	38.7384	24.6642	0	0	6.31664	17.7807	0	0	0	0	0	1.63363	1.85308	0.402829
XLOC_014720	PREDICTED: putative disease resistance protein RGA3-like [Brachypodium distachyon]	2.95032	3.59039	2.91749	3.63798	3.26653	1.56136	0	1.15917	1.45175	2.7142	2.34233	1.812	2.2559	1.99971	2.31941	0	0	0	0.966333	0.914801	1.06877
XLOC_003951	Endoribonuclease Dicer-3a-like protein [Aegilops tauschii]	15.0497	16.2407	11.8797	21.527	20.871	14.8993	8.51758	12.2999	0	0.741822	0.882969	0.313987	0.656675	0.437212	0.178748	0.964225	1.82755	1.43101	0.74598	1.46204	0.632156
XLOC_028518	PREDICTED: uncharacterized protein LOC100853565 [Vitis vinifera]	0	0	0	0	0	0	3.76974	0.625064	5.12434	1.38072	3.37655	1.84073	6.47108	0.480627	1.37396	0	0	0	11.937	2.07814	1.7755
XLOC_081051	PREDICTED: photosystem I P700 chlorophyll a apoprotein A1-like [Setaria italica]	1432.23	1014.1	1474.54	2136.8	390.031	1102.92	0	11.2622	12.4522	18.3867	112.788	0	0	95.6634	137.229	0	50.0075	4673.05	589.244	205.656	312.8
XLOC_078490	Exosome complex component rrp45 [Triticum urartu]	1.86526	2.41593	1.73224	1.90473	1.25098	2.20034	1.48009	1.10633	5.05463	4.07778	4.3137	6.71896	6.03344	3.36794	4.84522	18.9341	16.7991	14.8947	1.64613	2.65998	1.32933
XLOC_088632	predicted protein [Populus trichocarpa] >gi|222845909|gb|EEE83456.1| predicted protein [Populus trichocarpa]	1.44557	1.85169	1.59105	1.75507	1.62144	3.45942	46.0685	12.4056	0.936179	2.98961	1.19137	1.39244	0.680406	9.17308	19.8813	8.06339	17.2827	4.87609	39.0419	304.633	187.421
XLOC_055424	PREDICTED: heparan-alpha-glucosaminide N-acetyltransferase-like [Glycine max]	1.25641	1.09397	1.61306	0.957651	1.44261	0.946605	6.69951	4.61936	4.40314	11.3052	8.62307	9.35207	8.03351	9.10842	11.5665	24.6899	20.0073	14.6299	0.802509	6.02281	6.65562
XLOC_012497	PREDICTED: monoglyceride lipase-like isoform X4 [Setaria italica]	0.577952	0.542892	0.384401	0.678736	0.343409	0.332578	0.17576	1.1534	0	0.736905	0.666685	1.27	0.325842	0.349758	0.806217	0.430616	1.72434	1.98202	2.1431	1.22537	2.07311
XLOC_064371	Ferredoxin-nitrite reductase [Medicago truncatula] >gi|355509024|gb|AES90166.1| Ferredoxin-nitrite reductase [Medicago truncatula]	0	0.0481697	0	0.0760423	0	0.101045	3.54458	23.9915	0	0.107717	0.0380059	0.0700667	0.0862078	0.0516002	0	0	0	0	0.304064	4.21278	7.33323
XLOC_018860	hypothetical protein OsJ_35559 [Oryza sativa Japonica Group]	0	0.161373	0	0.110948	0	0	1.6486	0.330709	0	0	0	0	0	0	0	0	0	0	0	0	0
XLOC_020160	PREDICTED: signal peptide peptidase-like 2-like [Setaria italica]	33.3431	21.292	38.3299	16.5361	27.6375	20.6042	34.9155	7.56995	0	10.7382	0	23.9308	0	0	0	0	0	0	0	0	0
XLOC_042928	PREDICTED: poly(A) polymerase-like isoform X2 [Setaria italica]	0.982677	0	0	2.58688	1.52997	1.29756	3.14916	1.15435	0	0	0	0	0	6.21002	0.577783	0	0	2.36167	4.24289	12.2719	10.8974
XLOC_007175	envelope membrane protein (chloroplast) [Phalaenopsis equestris] >gi|329668879|gb|AEB96326.1| envelope membrane protein (chloroplast) [Phalaenopsis equestris]	37.3207	15.6054	34.2493	121.689	28.8468	40.37	0	0	0	4.02509	16.4751	30.0118	27.348	27.5649	9.68627	12.3578	0	0	13.9075	2.16262	4.41508
XLOC_080214	PREDICTED: uncharacterized protein LOC100244040 [Vitis vinifera]	149.655	110.39	69.5989	92.5809	134.026	106.787	43.2649	243.568	64.2136	18.5473	19.7037	17.1941	22.3307	17.5335	57.5038	34.5383	26.3397	42.2608	182.905	424.526	455.124
XLOC_030209	PREDICTED: putative methylesterase 11, chloroplastic-like [Solanum lycopersicum]	1.76362	2.50354	1.76894	1.55036	1.2302	0.34802	8.22557	5.90246	0	1.02643	0.371611	1.45825	3.66504	0	1.82143	2.95208	0	0	0.338625	0.774921	1.21446
XLOC_062027	unknown [Zea mays] >gi|413926300|gb|AFW66232.1| hypothetical protein ZEAMMB73_021965 [Zea mays]	12.2331	16.188	17.6782	20.242	8.38133	28.068	0	0	28.0704	16.7937	26.6163	37.4149	10.0487	27.3602	18.1553	5.92732	0	6.76883	15.4997	0.21305	0.619567
XLOC_093118	predicted protein [Populus trichocarpa] >gi|222862215|gb|EEE99721.1| predicted protein [Populus trichocarpa]	21.1548	22.4748	21.269	14.7002	14.838	16.9074	13.0528	4.56428	15.5633	37.5776	29.5162	36.9555	27.3721	19.5169	12.8276	0	1.15511	1.79654	10.1783	10.7928	14.4922
XLOC_016949	unnamed protein product [Vitis vinifera]	40.8765	43.3248	39.067	25.1007	36.1931	42.4007	73.7989	81.2753	5.51509	5.78647	34.0934	19.5564	15.7093	24.1405	14.227	0.856784	0.801201	0	4.48504	4.70469	6.91749
XLOC_014713	PREDICTED: serine/threonine-protein kinase PBS1-like [Setaria italica]	8.89594	12.9375	16.7523	11.2242	12.0986	13.3984	14.9246	5.62256	7.24881	3.15996	3.63773	3.771	5.46718	1.58147	0.663119	3.25299	1.08433	4.14214	9.59156	0	0.0869994
XLOC_002724	PREDICTED: pre-mRNA-splicing factor SF2-like [Brachypodium distachyon]	1.59183	0.170723	0.779112	0.382991	0.872487	1.20028	0.242683	0.271087	0	0.878868	0.676481	0.638033	0.500281	0.293238	0.221092	0	0	1.65491	0.09311	3.20271	0.827305
XLOC_075274	PREDICTED: folic acid synthesis protein fol1-like isoform X1 [Setaria italica] >gi|514807422|ref|XP_004978566.1| PREDICTED: folic acid synthesis protein fol1-like isoform X2 [Setaria italica] >gi|514807424|ref|XP_004978567.1| PREDICTED: folic acid synthesis protein fol1-like isoform X3 [Setaria ital...	1.041	0.966605	1.24271	1.01269	0.819685	1.12567	6.11959	2.91049	2.94669	2.74556	1.85986	1.93385	3.6123	3.09867	3.37517	0	0.35239	2.21242	2.06184	1.0704	1.87793
XLOC_060457	Actin binding family protein, putative isoform 1 [Theobroma cacao]	3.13947	4.57346	11.3832	5.15596	4.47081	5.15301	5.39682	7.20001	2.33712	4.50056	5.76178	4.72337	5.35372	7.03926	4.25155	1.64424	2.03536	2.63238	2.11394	7.00385	5.50278
XLOC_066565	PREDICTED: uncharacterized protein LOC100242589 [Vitis vinifera]	69.7139	132.061	117.165	112.207	74.0268	54.4417	21.6789	14.3771	1.33802	0.172143	9.57518	0.343154	4.99151	0	0.165894	9.88267	1.22549	3.89474	5.08537	25.2599	9.29773
XLOC_074959	hypothetical protein SORBIDRAFT_08g005110 [Sorghum bicolor] >gi|241942624|gb|EES15769.1| hypothetical protein SORBIDRAFT_08g005110 [Sorghum bicolor]	0.173931	0.263923	1.20285	0.140568	0.166675	0.507883	1.9821	1.21559	2.71342	3.22407	3.24467	3.94743	5.08035	0.726624	1.28661	7.44425	6.94796	11.1023	0.873888	0.390823	1.22303
XLOC_037062	Urease isoform 4 [Theobroma cacao]	7.68949	8.77816	9.35142	8.65961	6.19321	6.19008	9.41821	4.36723	2.71325	7.74149	10.2417	11.7989	6.13392	5.88969	4.50677	17.8327	31.0659	23.8245	6.48907	12.7251	9.57747
XLOC_059942	hypothetical protein VITISV_009621 [Vitis vinifera]	0.912187	0.666424	0.612743	0.651129	0	0.981629	1.30141	0.713998	0.0713349	0.89289	0.948238	0.509947	0.907475	0	0	0	0	0	0.147198	0	0.170744
XLOC_049606	beta-carotene hydroxylase [Crocus sativus]	2.54443	2.55058	17.5494	2.01374	1.53578	4.7961	8.58434	8.32228	0	6.31917	5.59395	6.80996	10.8281	66.7919	31.1112	13.6383	22.8408	17.7185	28.3614	71.8489	37.9043
XLOC_092966	hypothetical protein PRUPE_ppa003422mg [Prunus persica]	1.05947	7.56381	23.0985	0.724638	1.48646	14.0356	27.7394	3.85096	0.241283	0.376791	0.16843	0.144817	0.199517	4.07189	9.48354	0.416177	0	0.69442	12.0892	4.16732	3.47189
XLOC_074635	transcription factor PosF21 [Zea mays] >gi|195648356|gb|ACG43646.1| transcription factor PosF21 [Zea mays]	3.35055	2.81534	1.71163	3.12574	2.74846	1.69656	0.62638	1.6985	0.954552	0.739984	0.399192	0.555301	0.399409	0.165526	0.217099	8.06422	7.99431	18.6799	1.70087	4.44991	5.54269
XLOC_080645	Os01g0178200 [Oryza sativa Japonica Group] >gi|55296107|dbj|BAD67826.1| hypothetical protein [Oryza sativa Japonica Group] >gi|55296247|dbj|BAD67988.1| hypothetical protein [Oryza sativa Japonica Group] >gi|125524652|gb|EAY72766.1| hypothetical protein OsI_00631 [Oryza sativa Indica Group] >gi|12556...	4.01098	2.8858	2.87359	4.2838	4.21207	3.78466	3.92388	2.04425	8.6907	4.34797	3.47402	3.80564	4.88681	6.45655	9.98404	15.3021	12.949	13.5388	51.4817	8.8255	8.69296
XLOC_012217	PREDICTED: pectinesterase 3 [Vitis vinifera]	4.19189	5.08966	6.90544	4.1216	2.93351	5.06007	10.196	17.9842	12.5583	7.74293	12.8716	15.6204	12.057	14.0285	22.5893	43.152	61.9563	7.2979	59.7047	23.4895	31.5466
XLOC_007833	unknown [Picea sitchensis]	15.3233	16.9059	11.1989	18.6319	19.937	13.4438	21.649	17.9349	0	0	0	0	0	2.65951	0	9.79608	9.46967	5.37202	18.3238	14.9082	12.6737
XLOC_017630	hypothetical protein VITISV_015333 [Vitis vinifera]	0	0	0.239234	0.158187	0.198151	0.834596	1.29636	0.910607	0	0.860928	0.459186	0.724941	0.587856	4.23369	4.033	4.33892	0	3.48259	2.6502	0.34458	0.326794
XLOC_003919	alpha galactosidase isoform 1, partial [Cocos nucifera]	47.2508	54.1412	50.2362	60.0654	57.8349	43.2473	48.0332	81.4768	32.8776	29.0952	39.8074	43.2976	38.58	46.021	54.2756	24.1872	18.909	13.7556	12.6829	68.1257	52.4688
XLOC_007446	hypothetical protein PRUPE_ppa019257mg [Prunus persica]	4.54926	4.46734	6.05227	5.02364	6.56682	6.30285	10.5888	6.8135	2.8127	4.2831	4.06641	5.11696	4.85169	5.33786	6.93343	3.52244	2.578	3.86896	3.80704	3.00045	3.41391
XLOC_081247	PREDICTED: MIP18 family protein At1g68310-like [Cucumis sativus] >gi|449517634|ref|XP_004165850.1| PREDICTED: MIP18 family protein At1g68310-like [Cucumis sativus]	12.9898	11.4475	19.7992	9.13698	18.2928	8.63426	19.2743	14.7252	0	0	0	0	0	26.0383	37.0669	0	0	0	1.50849	0	0
XLOC_084403	flavonoid glucosyltransferase [Crocus sativus]	24.9088	17.8646	20.3074	26.146	17.0141	16.7299	29.3967	12.9483	2.29056	0.224439	0.0653911	0.373411	0.145339	9.50973	14.1233	156.427	240.585	198.955	48.7741	41.6726	54.7795
XLOC_033959	WRKY76 - superfamily of TFs having WRKY and zinc finger domains [Zea mays]	0	0.0693858	0.24098	0	0	0.392168	0.26816	0.496275	1.96893	0	0.0436436	0.0419743	0	3.80601	0.870092	1.1029	1.07234	1.28114	1.65334	1.48419	2.75034
XLOC_007601	Actin-binding FH2 protein isoform 4 [Theobroma cacao]	6.31944	6.27966	6.78148	9.31361	5.94108	6.22405	7.52086	3.24206	4.58479	11.3609	11.8802	12.9237	19.6175	18.5448	11.4092	0	0	0.888726	2.67015	3.0688	1.99859
XLOC_023811	unnamed protein product [Vitis vinifera]	37.8876	39.7847	31.8892	37.2408	33.9166	33.6714	16.4174	10.6491	72.7213	101.428	119.904	82.7246	91.8987	51.5665	39.7079	2.05686	3.82724	3.04892	22.9672	46.8276	32.7965
XLOC_088489	hypothetical protein TRIUR3_16494 [Triticum urartu]	15.2476	16.4179	14.7338	16.7059	15.9616	15.0571	16.4168	9.8318	44.0174	44.8759	46.5399	41.9339	44.2343	34.2727	50.8975	13.7987	18.0057	20.7575	42.0166	40.3552	61.9442
XLOC_088591	hypothetical protein PRUPE_ppa004891mg [Prunus persica]	0.142028	0	0.143889	0.0266245	0.02687	0.0444922	5.63962	5.97829	3.04627	0.499397	0.330832	1.61448	0.866424	0.303119	0.407198	0.874281	1.10924	1.06483	2.77556	11.9598	11.996
XLOC_028535	unknown [Lotus japonicus]	0	0	0	0	0	0	0	3.68064	0	0	0	0	0	0	0	0	0	0	0	0	0
XLOC_010077	uncharacterized LOC100194330 [Zea mays] >gi|194695538|gb|ACF81853.1| unknown [Zea mays] >gi|414881246|tpg|DAA58377.1| TPA: putative protein kinase superfamily protein [Zea mays]	0.440781	0.572011	0.331114	0.637685	0.473995	0.597955	6.42873	3.65585	2.29804	0	0	0	0	0	0	3.7665	0	4.26013	2.94088	0	0
XLOC_062804	uncharacterized protein LOC100802974 [Glycine max] >gi|255636069|gb|ACU18379.1| unknown [Glycine max]	42.6889	48.5559	41.2165	39.6922	43.1091	46.5185	0.326651	2.60735	67.1717	135.39	124.91	119.775	70.1703	126.7	118.891	6.10192	13.3376	9.22702	54.0428	187.429	116.464
XLOC_064677	PREDICTED: uncharacterized protein LOC100854951 [Vitis vinifera]	8.08136	6.506	8.56999	5.78991	9.73936	9.46657	26.2849	37.3355	11.363	11.0968	10.4268	12.8662	18.8068	16.8441	14.6273	0	0	0	3.67146	7.94338	9.10193
XLOC_069925	Os10g0571200 [Oryza sativa Japonica Group] >gi|19225011|gb|AAL86487.1|AC077693_26 putative pyruvate kinase [Oryza sativa Japonica Group] >gi|31433612|gb|AAP55104.1| Pyruvate kinase isozyme G, chloroplast precursor, putative, expressed [Oryza sativa Japonica Group] >gi|113639986|dbj|BAF27291.1| Os10g...	11.7264	11.9413	12.417	12.4392	11.1802	10.6306	11.1153	8.10529	22.726	33.4445	40.1909	33.9899	39.3887	29.1485	36.7535	0.944643	1.32916	1.60302	13.0523	12.7989	15.8871
XLOC_035271	unnamed protein product [Vitis vinifera]	2.59836	2.6959	3.07697	2.82179	2.64375	2.3885	1.30104	1.17981	5.54776	2.2642	2.25856	2.902	2.25799	2.68047	2.13324	0	0	0	1.06297	0.990128	1.16758
XLOC_021082	Retrotransposon, unclassified-like protein [Theobroma cacao]	2.11223	2.55625	2.6441	2.39979	2.58668	1.95212	1.80983	1.96893	2.07189	0.909006	0.755919	1.01693	1.37454	2.19411	3.29156	1.06216	1.06216	0.821291	0.648945	0.464697	0.36566
XLOC_041376	unnamed protein product [Vitis vinifera]	10.6385	5.28219	6.16212	12.6152	12.7051	4.75233	0.316364	5.58277	14.8018	26.4597	15.4556	15.5866	15.1791	0	0	4.04822	2.1223	2.46749	3.04807	7.96028	10.3562
XLOC_092025	conserved hypothetical protein [Ricinus communis] >gi|223548411|gb|EEF49902.1| conserved hypothetical protein [Ricinus communis]	0.160219	0.379531	0.713031	0.230189	0.507204	0	17.0045	21.1193	7.00733	0	0.40874	0.778099	0	0.90095	0	0	0	0.554031	0	1.35183	1.93329
XLOC_082374	SCARECROW-like protein [Lilium longiflorum]	0.109793	0.173713	0	0.140119	0.211327	0.12936	1.72392	0.137307	1.94268	4.01417	1.48082	1.98701	2.037	14.2899	22.7197	81.1865	82.4543	72.9689	15.0055	3.20517	6.95731
XLOC_047130	aig1, putative [Ricinus communis] >gi|223551472|gb|EEF52958.1| aig1, putative [Ricinus communis]	9.778	10.6297	0	0	0	7.10145	0	0	0	26.6034	109.572	129.429	54.4804	0	0	0	0	0	0	0	0
XLOC_044878	Plasma-membrane associated cation-binding protein 1, putative [Theobroma cacao]	0.794995	0	9.96399	1.2314	0	5.86693	20.6173	16.8608	30.2618	25.8828	32.2423	37.9467	59.5819	284.276	308.834	0	0	0	0.356365	10.755	2.51838
XLOC_070684	PREDICTED: probable alanine--tRNA ligase, chloroplastic-like [Cucumis sativus]	1.30676	1.35935	1.93818	1.4034	0.754675	1.02993	3.00526	1.43728	5.2715	3.46085	3.28439	3.41972	4.23487	3.16057	7.41335	0	0	0	1.19027	3.22127	5.37952
XLOC_064408	protein with unknown function [Ricinus communis] >gi|223549251|gb|EEF50740.1| protein with unknown function [Ricinus communis]	2.99934	0.431561	2.2773	2.26514	3.24881	1.97471	0.946391	0.623097	0	0.53851	1.3655	1.46323	1.2208	0.565946	1.66176	0	0	0	5.04247	0.859106	3.44435
XLOC_046698	PREDICTED: probable nicotinate-nucleotide pyrophosphorylase [carboxylating] [Vitis vinifera]	23.4335	18.4168	19.7463	26.575	19.2697	18.4451	9.27318	8.82062	14.1394	18.1135	20.5813	14.5299	17.1859	29.9448	19.9881	8.48303	4.2521	8.38245	8.78017	86.9696	15.1024
XLOC_047028	PREDICTED: probable tyrosine--tRNA ligase, mitochondrial-like [Setaria italica]	3.98292	3.3033	3.81481	4.18781	4.15754	3.15816	7.34429	3.19435	6.97793	6.06314	5.61105	5.08141	3.83838	24.5197	11.9716	5.43264	9.7311	7.17668	8.52162	11.6566	12.2877
XLOC_044335	PREDICTED: cytochrome P450 734A6-like [Brachypodium distachyon]	0.0637773	0	0	0.0441626	0	0.0439663	1.10477	0	0.114623	0.804682	1.3781	2.88875	4.10186	0.826075	0.130185	0	0	0	4.1949	0.480261	0.65224
XLOC_040501	Alanyl-tRNA synthetase, putative [Theobroma cacao]	4.54658	4.24386	2.86414	3.91661	3.44786	4.61668	40.3602	13.0328	7.96395	25.969	33.5239	40.3992	20.2981	14.4125	3.42696	0	0	1.53707	1.0201	0	1.59697
XLOC_073663	cinnamoyl CoA reductase-like protein [Populus trichocarpa] >gi|222850487|gb|EEE88034.1| cinnamoyl CoA reductase-like protein [Populus trichocarpa]	4.61116	11.3136	4.76466	5.79474	6.48901	4.99621	0	0	12.1982	4.56314	1.44433	1.45568	3.44465	31.174	6.95313	2315.88	1953.18	2845.42	10.8125	22.702	19.504
XLOC_071825	hypothetical protein M569_08080, partial [Genlisea aurea]	4.43688	7.05475	3.88396	4.26375	5.28138	7.04188	7.25142	5.83144	0.508058	5.82029	5.17039	5.3248	8.46998	3.98608	7.28444	0	0.530671	1.52205	2.11347	0	1.24053
XLOC_064614	unnamed protein product [Vitis vinifera]	0.08008	0.359577	0.111772	0.0763585	0.20259	0.154603	2.2111	2.01419	0.445646	0.316954	0.491346	0.456873	0.407104	1.38206	0.726799	0	0	0	0.350268	1.1101	1.97908
XLOC_082447	hypothetical protein PRUPE_ppa001419mg [Prunus persica]	0	0	0	0.216523	0	0	0.409567	0	4.5019	0.55525	1.94312	1.50479	1.81524	1.82895	1.17284	0	0	0	0	0.167212	0
XLOC_019656	hypothetical protein PRUPE_ppa008783mg [Prunus persica]	0	0	0	0	0	0	14.1077	4.17464	0	48.1425	24.7842	0	0	10.9312	0	0	0	0	14.1568	6.03455	5.1938
XLOC_080244	PREDICTED: peter Pan-like protein-like [Cucumis sativus]	42.8243	39.9961	28.9536	40.5929	30.7112	33.7453	23.6154	24.5273	40.0753	34.6156	36.2113	38.3969	33.6454	18.6099	25.5509	40.8733	27.4711	31.7127	13.1638	22.3305	22.4858
XLOC_013945	Sec1/munc18-like (SM) proteins superfamily [Theobroma cacao]	3.67091	2.85717	3.31191	2.74716	2.87926	3.2197	2.35853	3.45866	2.60884	4.58526	4.09038	5.48773	4.59006	3.98203	3.72136	2.12825	0	0.000857119	6.33624	0.789075	3.58958
XLOC_022912	V-type proton ATPase subunit E [Triticum urartu]	0.625262	1.35506	0.997582	1.59536	0.974368	0.730442	3.49975	6.19906	1.66359	0.486475	0.741207	0.281758	0.17241	0	0	0.213229	0	0	0.11573	0.226542	0.24997
XLOC_062722	predicted protein [Populus trichocarpa] >gi|222873362|gb|EEF10493.1| predicted protein [Populus trichocarpa]	4.42009	4.77054	5.45761	5.18523	5.53898	6.15644	9.11135	4.22375	15.5875	8.66479	10.7901	13.1944	11.6164	6.41159	7.59366	9.76461	3.55077	12.9273	18.7631	7.84498	3.73263
XLOC_058486	PREDICTED: ras-related protein RABC1-like isoform 1 [Solanum lycopersicum] >gi|460384028|ref|XP_004237717.1| PREDICTED: ras-related protein RABC1-like isoform 2 [Solanum lycopersicum]	9.59528	9.52325	9.27071	10.2309	10.5942	10.9887	12.35	9.42605	4.84482	18.1176	16.5051	18.1464	19.3252	13.0427	10.3469	0	0	25.8891	15.6704	1.99353	9.31732
XLOC_017713	PREDICTED: putative S-adenosyl-L-methionine-dependent methyltransferase MMAR_1068-like [Fragaria vesca subsp. vesca]	3.42492	4.11051	4.529	3.21438	2.24006	4.48593	8.73551	8.91871	1.45155	0.416602	0.449557	0.298582	0.28891	3.20657	2.7395	0.989794	3.46627	1.999	0.52037	1.3051	1.25011
XLOC_078227	Isoamyl acetate-hydrolyzing esterase, putative [Ricinus communis] >gi|223538232|gb|EEF39841.1| Isoamyl acetate-hydrolyzing esterase, putative [Ricinus communis]	11.0659	11.2534	7.87058	11.0609	7.72521	7.57074	23.3097	9.99485	3.54858	3.42791	2.08263	2.27948	0.655129	14.8145	9.76572	0	2.35285	5.28147	40.6225	7.2056	15.5488
XLOC_044745	PREDICTED: mitogen-activated protein kinase kinase kinase 1-like [Fragaria vesca subsp. vesca]	35.2004	28.605	25.8076	37.3914	30.0647	20.3507	7.17605	17.8855	11.9826	13.7662	13.565	14.8465	7.96981	4.08492	3.59415	1.44552	1.44909	1.21566	8.02675	8.84639	8.14826
XLOC_041351	unknown [Populus trichocarpa]	0.141273	0.23325	0.441128	0.1458	0.194608	0.270037	8.64681	10.2411	0	0.0924227	0.0484716	0.0946407	0	0.111622	0.207356	0.731716	0.717234	3.02143	11.0079	26.9273	29.8278
XLOC_070099	hypothetical protein SORBIDRAFT_01g010136 [Sorghum bicolor] >gi|241920421|gb|EER93565.1| hypothetical protein SORBIDRAFT_01g010136 [Sorghum bicolor]	2.76146	2.68739	2.41101	2.75048	2.60123	3.68596	2.33253	2.449	12.2138	8.52786	9.81974	9.30992	7.25373	6.14197	4.43802	0.399904	0.411173	1.09765	4.83978	1.10558	1.99365
XLOC_075404	predicted protein [Populus trichocarpa] >gi|222869958|gb|EEF07089.1| predicted protein [Populus trichocarpa]	0.575604	0.633481	0.460372	0.753178	0.640015	0.85345	0.431966	0.496571	0	0.065776	0.0704609	0.304465	0.0890016	0.149502	2.75914	2.90336	5.58286	7.48031	3.06001	0.912241	1.35737
XLOC_055492	pentatricopeptide repeat-containing protein, putative [Ricinus communis] >gi|223540005|gb|EEF41583.1| pentatricopeptide repeat-containing protein, putative [Ricinus communis]	0.344547	0.572913	0.466799	0.349873	0.275344	0.801573	0	0.0599024	0	0.930782	0.850141	0.718212	0.611184	0.20883	0.0929708	0	0	0	0.170949	0.106636	0.27405
XLOC_039645	hypothetical protein OsJ_01911 [Oryza sativa Japonica Group]	4.76416	4.61446	3.29847	5.08101	4.04482	2.27049	0.508766	0.653771	0.079325	0.223894	0.379672	0	0.518594	0.22555	1.07078	0	0	0	0.225165	0	0
XLOC_049263	Os03g0254700 [Oryza sativa Japonica Group] >gi|108707228|gb|ABF95023.1| expressed protein [Oryza sativa Japonica Group] >gi|113548058|dbj|BAF11501.1| Os03g0254700 [Oryza sativa Japonica Group] >gi|371501280|dbj|BAL44267.1| ASPR1 protein [Oryza sativa Japonica Group]	4.94224	6.33814	3.32486	5.51635	4.51126	5.68713	10.1731	5.97843	90.812	81.4122	73.4598	91.715	64.3741	66.5307	43.898	2.42498	1.23828	0.917734	17.559	15.9605	22.8901
XLOC_000932	PREDICTED: calcium-dependent protein kinase 8-like [Glycine max]	1.25732	1.26992	2.16826	1.51877	0.717164	1.66046	1.77887	1.75204	5.00553	0.960308	0.865029	0.985908	0.603289	2.38096	1.61542	0	0	0	0.62421	1.49625	1.66334
XLOC_058399	aldose 1-epimerase precursor [Zea mays]	0.938916	1.03575	0.26046	0.704203	0.743842	1.01024	6.61152	3.72722	0	0.29575	0.0767943	0.609843	0.397132	1.08413	1.95505	0.550636	2.02111	1.27551	0.781518	26.2398	4.94941
XLOC_034664	hypothetical protein OsJ_04415 [Oryza sativa Japonica Group]	9.87864	9.45162	8.9642	8.23644	10.1908	9.96194	1.54389	4.97857	6.20008	24.973	15.0561	24.9203	16.0801	4.64752	6.52302	0	0	0.937815	5.20289	10.0076	8.17614
XLOC_020567	PREDICTED: SUMO-activating enzyme subunit 2-like [Solanum lycopersicum]	12.6037	12.4926	11.2097	15.1364	14.2233	10.6455	10.4629	8.47806	11.6729	8.8727	7.3812	8.24089	7.83735	15.6457	7.63184	4.4868	7.09575	11.6081	7.12276	20.0168	17.0725
XLOC_042909	Carbonic anhydrase 2, CA2 isoform 2 [Theobroma cacao] >gi|508708584|gb|EOY00481.1| Carbonic anhydrase 2, CA2 isoform 2 [Theobroma cacao]	0.326803	1.46341	2.85183	0.444435	0.698725	1.16165	133.951	72.4605	9.57653	8.38911	3.43642	5.34909	5.03762	1608.2	4158.5	221.467	287.815	208.107	30.3945	187.664	140.927
XLOC_025140	Uncharacterized protein TCM_002682 [Theobroma cacao]	7.80172	4.37789	4.24908	4.12946	6.91641	6.34828	15.2429	14.5191	6.92618	6.64551	4.03104	5.63401	7.19675	17.3734	112.798	2.30074	2.30074	5.16882	8.2055	18.9236	16.0266
XLOC_000006	PREDICTED: RNA and export factor-binding protein 2 [Vitis vinifera] >gi|297746115|emb|CBI16171.3| unnamed protein product [Vitis vinifera]	2.34364	4.00292	2.88242	1.29478	2.69221	3.1348	48.7232	14.7792	26.1687	17.9972	17.2749	15.5037	17.0146	29.9836	42.9425	100.838	96.0607	54.1901	3.05826	31.3406	24.5624
XLOC_086200	PREDICTED: bifunctional epoxide hydrolase 2-like [Fragaria vesca subsp. vesca]	3.70098	2.60528	5.20295	4.03016	2.39649	3.36047	66.1085	93.6999	35.8047	26.9741	23.0198	27.2556	26.2729	31.8433	92.2274	52.9001	65.9688	59.9387	52.9747	29.3251	43.3796
XLOC_038706	Putative inactive purple acid phosphatase 20 [Aegilops tauschii]	0.0653952	0	0.205935	0.223363	0.0512547	0.0423068	4.48459	0.54653	0.164046	0.140469	0	0.162245	0	0.325959	0.0634241	0	0.508406	0	4.69381	1.4638	1.53779
XLOC_062895	Splicing factor isoform 2 [Theobroma cacao]	46.2757	34.9875	31.7723	54.8434	41.336	34.4285	58.3129	32.3798	35.7915	42.9247	37.4994	41.0959	33.9442	42.3337	35.5173	27.3151	25.2411	16.2254	9.79944	19.9546	33.9271
XLOC_013191	Photolyase/blue-light receptor 2 isoform 1 [Theobroma cacao]	18.8442	30.434	32.7388	25.3812	26.3203	34.5577	16.5732	7.93057	13.8937	16.8624	16.1932	20.7208	15.4603	47.2173	52.7322	125.701	93.0346	121.131	14.5024	28.1876	31.2943
XLOC_006348	putative Mg transporter [Oryza sativa Japonica Group]	23.0837	20.9805	16.8236	23.6898	22.2634	25.9748	2.01354	7.51735	7.71159	9.93226	1.46758	0.792638	2.39858	45.1564	14.6049	15.6227	34.7087	0.478899	9.15966	13.0738	16.0494
XLOC_063372	PREDICTED: serine/threonine-protein kinase ATM [Vitis vinifera]	9.51796	8.60719	7.62501	11.1458	9.44133	9.08501	5.50468	3.27525	6.1881	9.72757	10.3035	7.56957	9.01544	5.77903	5.22066	1.95342	0.983515	1.11735	2.7295	4.04739	6.12913
XLOC_014498	Os05g0196100 [Oryza sativa Japonica Group] >gi|255676112|dbj|BAF16778.2| Os05g0196100, partial [Oryza sativa Japonica Group]	1.51828	1.00174	2.15527	2.0983	2.56052	1.53802	4.19063	7.17813	0	1.00895	0.511035	0.692126	0.630836	0.100645	0	0	0	0	0	0	0
XLOC_005797	Histone superfamily protein [Theobroma cacao]	2.38866	1.91782	2.22068	1.76321	3.68011	2.44418	0.365385	0.186243	0	0	0	0.214407	0	0	0	0	0	0	4.53795	0	0
XLOC_000701	hypothetical protein PRUPE_ppa010862mg [Prunus persica]	43.2055	52.0136	21.3823	41.6415	47.2683	41.3407	93.6086	35.6727	19.5595	13.8334	4.53869	4.9909	5.68724	79.7727	187.624	36.5058	103.155	24.3542	238.413	71.8125	67.9137
XLOC_019708	hypothetical protein VITISV_010346 [Vitis vinifera]	66.2729	90.5808	107.769	84.0905	69.3836	84.3943	197.29	111.991	72.4031	75.7091	89.5736	111.553	48.1118	46.4582	7.36519	25.7093	0	21.2443	10.5253	0	0
XLOC_036620	PREDICTED: putative rRNA methylase YtqB-like [Solanum lycopersicum]	0.550017	0.704643	1.21391	1.27999	1.91282	2.09129	0.715517	1.36294	4.63092	5.63215	4.47657	4.19865	5.889	7.82713	8.51486	23.4997	18.5524	29.2201	17.6563	2.81378	2.90986
XLOC_022362	pentatricopeptide repeat-containing protein, putative [Ricinus communis] >gi|223535282|gb|EEF36959.1| pentatricopeptide repeat-containing protein, putative [Ricinus communis]	8.06783	9.83963	10.4074	10.7443	9.04121	9.53668	5.34053	4.45831	2.46588	4.92515	4.68481	4.49522	6.22346	6.47242	4.72665	0	8.59e-05	0	3.0928	3.48361	3.5502
XLOC_070181	Gag-pol polyprotein-like protein [Theobroma cacao]	0.226536	0	0.252018	0	0.182154	0.152643	0.300426	0	0	0.544695	0.141516	0.6822	0	0.192703	0	0	1.49743	1.13629	0.753618	2.22736	2.36423
XLOC_051261	putative profilin [Phalaenopsis hybrid cultivar]	0	0	0	0	0	0	0.26969	5.63735	14.7747	9.18179	6.19042	6.61944	6.22797	13.0416	17.6551	0	0	0	8.93246	4.79255	1.4803
XLOC_087174	PREDICTED: uncharacterized protein LOC100242692 isoform 1 [Vitis vinifera]	5.44932	2.40889	3.67347	2.47068	1.97703	1.80547	2.4069	2.87796	0.727518	3.44011	5.63035	3.00335	4.00215	0.000709995	0.255388	7.16338	0.116534	2.23603	0.876843	5.4818	5.91213
XLOC_070055	hypothetical protein CARUB_v10018625mg [Capsella rubella]	68.1441	70.4482	137.639	181.15	73.8229	87.0596	44.2966	39.6736	32.151	9.78479	10.1092	27.5855	0	3.01811	6.50821	0	0	0	2.5886	14.4931	3.17427
XLOC_026474	FAD-linked sulfhydryl oxidase ERV1 [Triticum urartu]	2.82242	2.8462	1.94632	4.17714	2.23185	2.53365	7.73014	5.79555	2.45009	5.1301	4.33669	5.40638	7.99985	4.71661	3.94973	6.67318	4.2083	5.25564	1.52265	0.949863	1.76404
XLOC_009924	PREDICTED: mitogen-activated protein kinase 10-like [Setaria italica]	1.25885	0.574801	1.31728	0.572672	0.809515	0.270136	1.04525	0.892591	0	0	0	0	0	0	0	0	0	0	0.47726	0	0
XLOC_046893	TPA: hypothetical protein ZEAMMB73_266266 [Zea mays]	20.5748	18.3212	21.123	25.4327	19.3091	18.0546	29.6517	20.1539	2.04198	12.7519	13.1902	18.9989	17.0438	20.507	9.44614	6.96271	8.34474	3.05391	1.64116	11.8036	3.21926
XLOC_089824	Tesmin/TSO1-like CXC domain-containing protein [Theobroma cacao]	2.28026	1.75374	0.966507	2.13977	1.59301	0.959527	7.81453	2.70465	2.64083	1.7678	1.99313	1.8048	1.93801	5.26848	6.18497	0	0.607885	0	2.06626	3.40279	2.35702
XLOC_025246	predicted protein [Populus trichocarpa] >gi|222867061|gb|EEF04192.1| predicted protein [Populus trichocarpa]	2.78589	2.33756	2.85947	3.53713	2.91599	3.84035	1.36568	0.491085	7.34132	2.44206	2.06313	1.95253	1.59885	1.87778	0.767553	0	0.733426	0	2.93154	2.73792	3.2153
XLOC_073539	PREDICTED: golgin candidate 6-like, partial [Cucumis sativus]	8.26189	7.15755	6.15615	7.21855	6.23454	7.07835	3.24682	3.2299	18.9674	17.7671	18.3004	18.8793	20.5063	13.6351	7.60703	2.46434	1.0175	2.66668	8.01126	9.9427	14.1885
XLOC_024627	ATP synthase subunit beta [Medicago truncatula] >gi|355496710|gb|AES77913.1| ATP synthase subunit beta [Medicago truncatula]	10.7812	14.6568	19.0342	9.36323	6.70202	10.6933	1.25973	1.18239	3.55122	1.20279	2.3646	3.17415	3.12214	15.4729	10.7791	1.01045	1.68409	1.30255	8.90869	3.03557	4.26077
XLOC_088664	predicted protein [Hordeum vulgare subsp. vulgare]	6.88895	7.74468	13.5287	8.27648	8.25775	8.95017	4.3544	6.30164	6.04367	5.51106	5.58206	6.70494	6.73771	1.77516	1.71048	3.99665	7.35732	8.70726	2.43843	0.87109	1.31599
XLOC_019223	unnamed protein product [Vitis vinifera]	2.95561	4.81686	3.16024	3.12225	3.16213	4.08483	24.1898	30.9075	4.11757	2.74678	5.45503	3.6725	3.67241	25.1522	25.0053	1.21085	3.63255	1.84636	1.6653	9.0057	9.08663
XLOC_075512	125 kDa kinesin-related protein [Aegilops tauschii]	0.308321	0.286242	0.301856	0.311053	0.286416	0.841559	0.763411	0.29682	0	0	1.11e-06	0	0	0	0	0	0	0	0.0416155	0	0
XLOC_081151	Uncharacterized protein TCM_037877 [Theobroma cacao]	1.80359	3.39171	4.89186	2.21892	1.76138	2.82554	8.52315	2.46239	0	0.175931	0.148576	0.307021	0	2.06885	2.04445	0.761722	0	0.592207	0.954918	0.654497	0.379708
XLOC_089116	unnamed protein product [Vitis vinifera]	0.046255	0.0426513	0	0.092462	0	0	2.04593	1.58078	0	0	0	0	0	0	0	0	0	0.195975	0.0567589	0.0375627	0.0569555
XLOC_046619	PREDICTED: uncharacterized protein LOC101257285 [Solanum lycopersicum]	24.4186	24.2727	23.3275	28.0651	18.9526	23.8065	43.3239	23.4204	24.5771	14.4128	11.411	13.2778	9.69958	86.0475	99.2183	67.0367	53.7968	76.0262	52.0075	50.1338	56.4866
XLOC_045386	predicted protein [Hordeum vulgare subsp. vulgare] >gi|326512958|dbj|BAK03386.1| predicted protein [Hordeum vulgare subsp. vulgare]	752.065	849.885	477.525	1033.01	824.275	857.904	133.912	127.282	40.7363	162.305	156.605	108.806	85.5978	15.5734	28.6067	6.52592	14.428	11.6441	321.447	344.605	352.095
XLOC_021950	hypothetical protein OsI_08834 [Oryza sativa Indica Group]	3.21042	7.60788	2.06943	3.49219	5.49221	4.54136	5.47762	3.55204	2.61105	3.46024	3.09269	1.61269	2.48678	256.919	193.114	525.571	633.008	684.923	224.714	17.3026	15.3898
XLOC_012682	Leucine carboxyl methyltransferase isoform 3 [Theobroma cacao]	22.5346	32.1934	30.2661	23.2101	30.658	29.8515	25.0585	17.8677	33.6083	34.5489	48.3644	29.6641	33.974	30.2582	24.544	8.25078	2.10245	1.54488	8.42137	12.9967	13.6596
XLOC_029488	hypothetical protein SORBIDRAFT_10g022930 [Sorghum bicolor] >gi|241916842|gb|EER89986.1| hypothetical protein SORBIDRAFT_10g022930 [Sorghum bicolor]	0.534743	0.37735	0.433487	0.642736	0.63646	0.843702	0	0.0513802	0.413957	0.611287	0.293902	0.0945282	0.395772	0.0661129	1.05264	0	0	0	0	0.256702	0.542196
XLOC_006918	Os01g0935500 [Oryza sativa Japonica Group] >gi|75164097|sp|Q942X8.1|HAK2_ORYSJ RecName: Full=Probable potassium transporter 2; AltName: Full=OsHAK2 >gi|15408801|dbj|BAB64197.1| putative HAK2 [Oryza sativa Japonica Group] >gi|113534851|dbj|BAF07234.1| Os01g0935500 [Oryza sativa Japonica Group] >gi|22...	12.1456	12.185	13.498	8.40513	11.1347	12.444	12.4657	11.8662	1.27214	0.733351	0.738554	0.767945	2.79826	0	0	0	1.05453	0.381942	0.057415	0.973868	0
XLOC_077986	pg1, putative, expressed [Oryza sativa Japonica Group] >gi|108864594|gb|ABG22556.1| pg1, putative, expressed [Oryza sativa Japonica Group] >gi|125577917|gb|EAZ19139.1| hypothetical protein OsJ_34675 [Oryza sativa Japonica Group]	2.96611	2.86727	9.00378	3.2352	1.65812	2.55761	3.81004	3.25542	21.9608	19.276	16.4511	19.2411	25.7674	11.0646	40.4217	8.19824	10.4144	12.7705	8.47675	2.39776	2.54487
XLOC_038905	PREDICTED: serine/threonine-protein kinase BRI1-like 1-like [Vitis vinifera]	0	0	0	0	0	0	2.91549	0.0572973	0	0	0	0	0	1.46663	0.28522	0	0	0	1.62313	0.142096	0.0735697
XLOC_074683	Ubiquinone biosynthesis protein coq-8, putative [Ricinus communis] >gi|223532076|gb|EEF33885.1| Ubiquinone biosynthesis protein coq-8, putative [Ricinus communis]	6.11035	9.78184	6.2196	9.64978	9.8241	7.89677	8.44196	4.39766	14.0611	13.3212	16.4904	12.2617	17.4179	13.3996	8.87653	3.32755	2.01029	2.05157	10.3385	6.24227	11.1017
XLOC_057256	predicted protein [Populus trichocarpa] >gi|222846855|gb|EEE84402.1| predicted protein [Populus trichocarpa]	22.7514	18.9766	14.8477	27.4366	19.2088	17.6348	6.2453	7.61648	26.6908	32.1745	32.5032	33.6578	27.1995	17.3861	13.6435	1.21745	1.19847	1.87843	11.0492	15.1263	16.8837
XLOC_039846	pheophorbide a oxygenase [Brassica oleracea]	0.0453502	0	0.295166	0.0614895	0	0.120631	0.226712	0.440933	3.99801	0.930144	1.21392	0.909798	0.967054	0.881011	0.195373	0.640174	1.28035	0.492668	0.360081	3.47294	1.15022
XLOC_051337	predicted protein [Hordeum vulgare subsp. vulgare]	0.203645	0.977074	1.49189	0.710679	0.753258	1.61514	14.4836	1.44048	6.02213	6.71878	5.87899	2.02819	5.42367	1.35646	3.18748	8.50456	22.2471	17.2707	10.8618	1.54921	5.33299
XLOC_041043	PREDICTED: putative membrane-bound O-acyltransferase C24H6.01c-like isoform X2 [Cicer arietinum]	1.84038	2.04671	1.49253	6.12685	1.05113	1.17571	2.83004	3.36535	0	3.28535	3.3136	2.00996	3.23831	0.345927	0	2.19484	3.51532	0.863333	2.05053	0.52063	2.47189
XLOC_074871	OSJNBb0038F03.15 [Oryza sativa Japonica Group] >gi|218195316|gb|EEC77743.1| hypothetical protein OsI_16859 [Oryza sativa Indica Group]	0	0	0	0	0	0	3.02325	1.06994	0	0.382388	0.293917	0.282829	0.1722	0.193814	0.382623	1.11217	0	0.432915	0.58885	0.699865	0.689857
XLOC_063476	hypothetical protein POPTRDRAFT_820938 [Populus trichocarpa] >gi|222851668|gb|EEE89215.1| hypothetical protein POPTRDRAFT_820938 [Populus trichocarpa]	75.332	107.297	58.4107	74.4682	134.938	56.4993	120.006	47.3229	0	0	0	0	0	0	0	0	0	0	0	0	0
XLOC_087585	PREDICTED: mRNA cap guanine-N7 methyltransferase 1-like [Cicer arietinum]	3.29755	3.65908	2.86171	2.97424	2.99175	2.26225	17.7168	10.7818	3.17426	18.5585	18.2416	16.8818	20.9945	31.6023	11.3425	0	0	1.42446	1.11971	17.5005	26.9319
XLOC_084078	protein kinase family protein [Musa acuminata]	1.5671	3.08997	2.28972	1.33201	0.536769	2.56537	0	0.386029	0	0.188938	0.0642566	0.0681498	0.0531404	0	0	0	0	0	0.0771888	0	0
XLOC_011950	germin-like protein 6a [Hordeum vulgare subsp. vulgare]	12.5667	11.6647	9.00538	12.2665	8.19264	13.4085	26.662	25.6414	3.99317	9.10069	5.70141	6.37616	4.316	14.3527	31.292	27.1356	39.9779	26.7106	108.932	57.6295	39.1365
XLOC_092234	Auxin efflux facilitator isoform 2, partial [Theobroma cacao]	2.0434	6.41018	5.51653	2.84631	1.6096	3.72056	2.94588	0.383197	2.37972	0.555632	0.442748	0.224894	0.071951	1.07872	0.0917514	0.189909	0	1.56577	2.06673	1.04376	1.08462
XLOC_049539	unnamed protein product [Vitis vinifera]	1.15865	0.966778	1.10284	1.26247	0.89811	0.806998	14.5858	25.8501	5.39833	5.8075	8.01456	7.0872	6.59341	7.68569	5.14864	0	0	0.402683	7.93136	17.8582	22.833
XLOC_030663	unnamed protein product [Vitis vinifera]	7.96658	7.73028	4.43224	4.92209	5.24269	6.75591	6.88386	5.1525	20.3058	21.9536	18.2275	20.1698	20.8454	2.61146	2.57552	3.67354	0.505686	4.31894	3.8999	1.98015	4.57575
XLOC_052365	glycine decarboxylase P protein, partial [Flaveria pringlei]	32.124	29.6505	29.1652	19.9475	19.9596	21.0364	68.4688	7.60705	15.8476	32.7281	15.2551	15.6019	25.2266	172.074	175.963	39.2566	21.4127	28.9552	349.98	273.547	235.172
XLOC_017599	thioredoxin-like protein 1.2, partial [Populus trichocarpa x Populus deltoides]	0	0.809623	0.982236	0	0.666376	0	47.5851	8.07202	5.18304	13.8053	19.7465	19.2317	20.4712	3.69971	20.8257	0	0	0	3.1925	0	0
XLOC_048961	hypothetical protein VITISV_004513 [Vitis vinifera]	1.76502	1.94844	2.25156	2.70955	2.60009	3.07686	47.4392	47.4656	0.759892	1.53054	5.41525	3.24385	2.59039	1.4471	0.80704	4.67173	2.66488	3.49733	2.72856	1.66378	2.18294
XLOC_002856	PREDICTED: probable inactive purple acid phosphatase 27-like [Fragaria vesca subsp. vesca]	3.44252	1.74266	0.405227	6.34937	3.135	1.17361	10.1358	3.70696	8.57956	9.92531	12.0685	13.9116	17.773	22.0938	8.05255	0	0	0	2.25392	0.648027	4.14597
XLOC_048661	predicted protein [Hordeum vulgare subsp. vulgare]	3.41843	2.04614	7.32885	2.00253	2.12516	1.44006	9.25202	9.37719	14.1249	2.90596	9.20721	7.31587	7.57815	12.353	9.31514	0	0	0	8.42878	2.19446	5.21248
XLOC_017618	Potassium transporter family protein isoform 1 [Theobroma cacao]	18.0567	20.5371	24.9754	24.549	18.9233	19.6332	15.6766	15.4528	6.15781	9.10886	9.93225	8.07056	7.04737	26.6661	41.3977	30.7737	15.6835	36.0333	21.0316	6.50756	12.4905
XLOC_050002	hypothetical protein OsI_35398 [Oryza sativa Indica Group]	15.1405	15.172	12.0022	19.8383	15.3649	13.4125	3.71101	4.63887	12.5641	10.5713	11.3246	9.48668	7.91619	5.20661	6.01975	6.67362	6.26361	5.37885	6.70985	8.22296	14.0061
XLOC_021916	RecName: Full=Premnaspirodiene oxygenase; Short=HPO; AltName: Full=Cytochrome P450 71D55 >gi|151335776|gb|ABS00393.1| cytochrome P450 hydroxylase [Hyoscyamus muticus]	0	0	0	0	0.0365464	0	13.8003	20.3952	0	1.71703	1.16946	2.78812	2.42802	0.0363142	0.0519675	0	0.32731	0	0.0301851	29.6559	33.6243
XLOC_078159	NADP-malic enzyme [Aloe vera]	25.9749	48.6492	73.2259	39.6987	35.2043	48.0161	247.111	114.64	214.468	428.48	463.547	383.003	322.325	176.934	95.032	37.1397	22.1646	10.9817	53.6554	77.7899	39.7946
XLOC_056185	PREDICTED: 40S ribosomal protein S6 isoform 1 [Vitis vinifera] >gi|296087487|emb|CBI34076.3| unnamed protein product [Vitis vinifera]	9.06443	25.8578	11.9236	20.7583	30.7575	12.3943	27.2377	21.4769	12.7364	35.0188	29.8895	14.3591	31.0324	25.179	40.445	12.8621	0	37.0486	150.77	17.1987	71.8509
XLOC_070175	conserved hypothetical protein [Ricinus communis] >gi|223542985|gb|EEF44521.1| conserved hypothetical protein [Ricinus communis]	20.5327	18.814	23.3081	23.7064	21.3083	18.3937	1.492	5.63748	0.91052	5.05646	4.57812	3.46746	1.3844	2.45977	8.10357	0	0	1.23582	11.8115	2.83766	5.76965
XLOC_094103	putative ubiquitin carboxyl-terminal hydrolase superfamily protein [Zea mays]	1.2455	1.66517	2.37405	2.5267	1.06461	1.66547	5.71378	5.99099	2.61105	2.51928	3.02927	3.40575	3.86961	3.39036	17.9089	3.32653	2.96125	2.89811	7.11035	18.2063	19.7609
XLOC_051209	LOC100285326 [Zea mays] >gi|223946325|gb|ACN27246.1| unknown [Zea mays] >gi|414587785|tpg|DAA38356.1| TPA: farnesylated protein 1 [Zea mays]	0.230118	1.02558	0.435583	0.0225017	0.488521	0.47207	3.32966	1.67015	10.9204	10.4647	5.69138	4.75398	3.30173	46.6309	29.2946	0.825264	1.84212	4.92383	1.69378	12.4633	4.15483
XLOC_040997	H0714H04.9 [Oryza sativa Indica Group]	2165.81	617.556	325.168	527.033	442.272	327.325	339.331	344.21	355.224	455.336	464.259	435.1	337.387	310.892	228.932	60.0561	21.7041	17.5022	309.867	1242.92	990.695
XLOC_004940	Poly(A) RNA polymerase cid14, putative [Theobroma cacao]	0.290877	0	0.00967771	0	0	0	0	0	0	1.23534	0.990826	1.22629	1.69318	0.0856992	0.000423135	0	0	0	0.919501	0	0.741426
XLOC_085436	hypothetical protein PRUPE_ppa000661mg [Prunus persica]	0	0	0	0	0	0	0	0	1.18947	0.0120651	0	0	0	0	0	0	0	0	0	0	0
XLOC_058566	predicted protein [Populus trichocarpa] >gi|222857921|gb|EEE95468.1| predicted protein [Populus trichocarpa]	6.4859	6.22645	4.27753	6.91276	6.6836	5.37088	5.64179	4.85905	0	0.041603	0	0.0387805	0	0.0603802	0	0	0	0	0	0	0
XLOC_035580	Pollen Ole e 1 allergen and extensin family protein [Theobroma cacao]	1.44301	0.759317	2.4869	5.09197	5.75462	6.44194	0.194645	0.21922	0	0.0928883	0.567193	0.441076	0.160181	0.513324	0	0	0.7864	0	7.69359	1.89951	0.745625
XLOC_054267	unnamed protein product [Vitis vinifera]	18.2592	18.5987	19.4911	23.2802	20.3252	16.8364	14.0062	14.0687	23.7309	31.1903	31.1216	33.2119	31.1807	29.0981	27.6423	9.74261	10.3165	14.2208	16.0479	13.9974	19.2837
XLOC_029456	PREDICTED: mutS protein homolog 5-like [Brachypodium distachyon]	47.4347	30.2839	18.7835	47.9343	33.6239	18.1729	0	1.34907	13.8386	17.3544	30.3643	20.098	24.2496	4.12743	0.955233	3.33294	3.39279	4.29958	6.38651	4.59507	6.73743
XLOC_040029	hypothetical protein OsI_18195 [Oryza sativa Indica Group]	10.2401	6.32903	11.1228	13.1113	8.11845	9.05571	7.46999	4.52234	4.7226	6.9312	5.99545	5.83452	6.08323	3.13607	6.36779	5.15671	6.25145	8.28941	7.33556	3.44999	5.33371
XLOC_086157	hypothetical protein F775_03899 [Aegilops tauschii]	1.62838	1.9357	1.69837	1.39806	1.27281	1.52911	0.538094	0.116594	0	0.411892	2.35212	1.01013	1.19976	0.750542	1.03226	0	0	0	0.0831551	1.1238	0.232089
XLOC_046030	hypothetical protein SORBIDRAFT_02g027100 [Sorghum bicolor] >gi|241925892|gb|EER99036.1| hypothetical protein SORBIDRAFT_02g027100 [Sorghum bicolor]	0.53793	0	4.42995	1.25239	1.31486	2.60655	0	0	2.83864	8.54391	10.5641	10.7873	12.2781	9.77999	1.44039	21.7638	12.4365	11.5115	62.5829	0	0.347068
XLOC_073414	PREDICTED: zinc finger CCCH domain-containing protein 25-like [Cucumis sativus]	20.1524	16.64	14.394	17.2625	15.6742	20.8678	3.49818	10.8806	10.1119	1.78656	7.79703	7.34114	0	15.8094	12.2857	97.3238	361.329	149.384	0.000107741	0.268349	18.5416
XLOC_081236	PREDICTED: magnesium transporter MRS2-3-like [Solanum lycopersicum]	17.1293	18.8573	18.0128	15.2058	14.7648	18.3986	32.0574	25.993	19.0157	27.8607	31.1057	27.7417	25.4414	21.8941	7.59447	23.523	16.0338	41.7107	6.64125	3.37658	2.97087
XLOC_034382	spermine synthase [Malus sylvestris]	9.56506	8.99368	5.83416	11.7661	8.26131	9.78521	8.71344	11.9719	5.52472	15.7422	17.9162	23.5562	13.013	16.8761	11.8246	17.3285	6.88517	26.4836	2.12465	5.02072	3.28166
XLOC_075247	PREDICTED: 50S ribosomal protein L28, chloroplastic-like [Cicer arietinum]	0.998191	1.3189	1.37781	0.94976	1.4398	1.84165	4.22627	5.55275	0.0733781	0.239429	0.413576	0.240502	0.297554	3.03275	32.7288	10.3989	5.01541	3.22689	1.79766	0.839348	1.10687
XLOC_057739	transparent testa glabra 1 [Rosa rugosa]	1.15549	0.980221	1.75417	1.31447	1.34544	1.81231	1.33717	1.24291	0.0476992	0.651146	0.281238	0.158375	0.108867	0.468521	0.449892	0	0	0.510601	0.891713	0.714578	0.276078
XLOC_065972	hypothetical protein F775_09877 [Aegilops tauschii]	0.611805	0.269807	1.27789	0.675577	0.746484	0.831294	0.00338531	0.325877	0.510488	1.69962	3.71038	2.25709	2.70145	2.06846	1.58986	0	1.18533	0.578736	0.856784	0.814689	0.458012
XLOC_062313	PREDICTED: tyrosine--tRNA ligase-like [Solanum lycopersicum]	44.0119	43.5678	37.2778	47.6184	43.878	38.4728	29.6121	23.2549	45.7021	48.571	64.2479	60.9755	49.1734	39.81	33.1492	5.29044	1.45865	5.85702	16.1944	6.91204	13.3971
XLOC_058988	Uncharacterized protein TCM_033752 [Theobroma cacao]	1.94439	1.30094	0	3.09985	1.58988	1.35499	1.00249	1.91535	4.6557	38.3096	51.1819	40.0656	48.0906	14.6965	0.557185	7.18542	0	0	9.15243	5.65852	3.29522
XLOC_001358	PREDICTED: branched-chain-amino-acid aminotransferase-like protein 3, chloroplastic [Vitis vinifera] >gi|296081877|emb|CBI20882.3| unnamed protein product [Vitis vinifera]	11.6692	17.8828	21.8095	10.3499	11.724	18.6538	15.8263	9.64116	11.2563	33.8323	47.3895	62.8189	47.2726	93.8086	53.8568	97.6135	54.6346	99.5364	19.7259	12.9977	13.3374
XLOC_030924	predicted protein [Populus trichocarpa] >gi|222871859|gb|EEF08990.1| predicted protein [Populus trichocarpa]	1.36632	1.48715	1.57319	1.32289	1.68319	1.96914	1.17394	1.10658	4.57274	4.27163	4.13131	4.20649	5.10366	4.99641	3.79932	1.71275	0.939399	1.81203	0.783434	2.42553	2.89528
XLOC_022840	hypothetical protein TRIUR3_30233 [Triticum urartu]	3.12599	1.06328	1.20986	3.71299	1.77468	1.60689	2.96288	2.96605	7.14671	13.1943	9.82809	12.7958	10.3363	3.51904	2.51735	5.3547	4.437	1.11056	2.95769	6.38637	2.17295
XLOC_038310	conserved hypothetical protein [Ricinus communis] >gi|223530392|gb|EEF32280.1| conserved hypothetical protein [Ricinus communis]	0.796742	0.336555	0.479962	0.419826	0.21226	0.647433	0.221075	0.0615207	0.156175	0.251971	0.205831	0.295645	0.0898177	0.143205	0	0	0	0	0.35142	1.64197	2.32575
XLOC_035987	PREDICTED: translation machinery-associated protein 22 [Vitis vinifera] >gi|297738660|emb|CBI27905.3| unnamed protein product [Vitis vinifera]	18.1871	5.56757	7.15486	4.48643	10.9861	6.74991	0	0	0	20.8571	28.0745	30.003	4.6091	8.90227	0	0	0	0	0.539588	0	4.10483
XLOC_047239	uncharacterized protein LOC100383866 [Zea mays] >gi|224032621|gb|ACN35386.1| unknown [Zea mays] >gi|413951267|gb|AFW83916.1| hypothetical protein ZEAMMB73_299772 [Zea mays]	37.7806	43.2442	53.4047	43.8009	37.603	36.8504	21.6708	12.3774	37.3853	38.7579	40.9859	40.1939	45.1966	55.3709	26.5265	4.61093	0	2.66286	11.7019	14.5161	17.4958
XLOC_015832	uncharacterized protein LOC100501070 [Zea mays] >gi|238007478|gb|ACR34774.1| unknown [Zea mays]	1.60145	0.60091	1.88827	1.66747	0.895612	0.844932	10.3612	3.77755	0	0	0	0	0	0	0	0	0	0	0	0	0
XLOC_090515	hypothetical protein SORBIDRAFT_05g025520 [Sorghum bicolor] >gi|241935754|gb|EES08899.1| hypothetical protein SORBIDRAFT_05g025520 [Sorghum bicolor]	12.3224	12.6889	8.95001	12.9558	12.291	14.4696	12.3386	5.45139	21.2963	8.31999	10.8024	11.2507	9.45483	11.2854	9.91026	18.6131	7.27824	10.9356	4.81656	4.89564	5.08757
XLOC_049110	PREDICTED: carboxyl-terminal-processing protease-like [Cicer arietinum]	0	0	1.23749	0	0	0	5.2792	1.0947	0	0	0.359478	0.351413	0.299968	1.48271	0.818463	0	0	0	0.159424	0	0
XLOC_048263	TPA: putative leucine-rich repeat transmembrane protein kinase family protein [Zea mays]	10.0095	6.62292	9.40888	11.8049	8.48603	10.0803	16.814	14.294	14.8374	27.8813	29.5466	20.3793	24.1717	12.1927	6.93292	7.41188	3.26944	3.06846	1.97033	13.0648	9.99134
XLOC_050268	conserved hypothetical protein [Ricinus communis] >gi|223548297|gb|EEF49788.1| conserved hypothetical protein [Ricinus communis]	5.00294	2.79485	4.72276	3.59982	5.17781	3.94782	7.71617	4.0187	0.636357	3.65925	3.42064	7.92916	6.54087	4.51635	12.2953	0	0	0	1.16138	3.25619	3.45248
XLOC_076264	unknown [Picea sitchensis]	2.93024	2.00212	3.27494	3.15377	3.57246	3.1836	10.2242	5.68799	0.100109	5.36733	5.10239	6.57833	4.80499	7.5127	9.97597	0	0	1.30092	14.8433	6.93214	11.3179
XLOC_001015	GRAS family transcription factor [Populus trichocarpa] >gi|222850995|gb|EEE88542.1| GRAS family transcription factor [Populus trichocarpa]	5.33994	3.47702	4.76795	8.50736	6.27298	5.06391	23.772	14.0797	0	0	0.213418	0	0	0	0	0	0	0	0	0	0
XLOC_025222	HMP-PP phosphatase [Medicago truncatula] >gi|355477494|gb|AES58697.1| HMP-PP phosphatase [Medicago truncatula]	1.34925	1.60892	2.33873	2.20613	2.06715	2.54032	16.6678	9.96696	0	0.189439	0.391274	0.0954517	0	0	0	0	0	0	0.0980956	0	0
XLOC_010595	conserved hypothetical protein [Ricinus communis] >gi|223539590|gb|EEF41177.1| conserved hypothetical protein [Ricinus communis]	11.1822	12.3502	8.79988	10.2863	7.24975	15.5729	48.2967	33.6724	23.6337	17.4093	12.686	11.3235	15.9642	36.9134	56.2156	35.3425	21.7507	21.2641	43.781	18.3846	13.143
XLOC_090899	PREDICTED: dof zinc finger protein DOF1.7-like [Cucumis sativus] >gi|449476907|ref|XP_004154872.1| PREDICTED: dof zinc finger protein DOF1.7-like [Cucumis sativus]	1.26961	0.563131	0.641168	1.26907	2.0226	0.501837	9.66059	4.77646	0.441562	2.17533	1.51482	0.917797	1.22207	2.71651	7.89982	4.67084	3.45041	8.16316	6.3606	4.17858	5.62313
XLOC_045398	hypothetical protein [Zea mays] >gi|194703296|gb|ACF85732.1| unknown [Zea mays] >gi|414867776|tpg|DAA46333.1| TPA: hypothetical protein ZEAMMB73_643750 [Zea mays]	9.79762	10.5151	14.6895	13.0469	11.4162	10.3294	44.1346	17.72	26.2134	14.5678	16.1	11.9286	18.0935	16.8997	24.3573	131.857	151.862	195.4	119.09	167.178	82.5374
XLOC_059359	hypothetical protein SORBIDRAFT_07g026240 [Sorghum bicolor] >gi|241941049|gb|EES14194.1| hypothetical protein SORBIDRAFT_07g026240 [Sorghum bicolor]	15.4304	14.821	13.3225	21.0052	16.2059	15.6883	13.1277	13.1485	20.5336	22.6889	28.2672	27.7823	23.8735	23.5828	17.7303	23.8936	24.2544	26.0267	8.56976	12.6145	14.3867
XLOC_040944	PREDICTED: exocyst complex component 7-like [Fragaria vesca subsp. vesca]	305.159	380.906	178.734	490.344	543.249	223.971	1872.54	238.481	246.95	567.969	986.998	1405.61	421.142	220.561	1391.27	275.952	55.1905	0	34.1811	178.679	173.209
XLOC_090866	unknown [Lotus japonicus]	17.8172	19.1512	25.2009	20.113	16.0213	20.5677	37.7623	26.1353	60.4981	59.2347	61.553	64.9457	76.1597	86.9426	105.978	222.389	182.702	234.954	75.1786	15.16	16.2083
XLOC_012272	pathogenesis-related protein [Hyacinthus orientalis]	3.55e-06	0	0	0	0	0	216.848	163.924	0.51676	1.71917	2.27374	3.72541	1.47444	21.5896	0.288061	0	99.9768	0	2.28528	22.9063	27.5168
XLOC_086356	uncharacterized protein LOC100305644 precursor [Glycine max] >gi|255626171|gb|ACU13430.1| unknown [Glycine max]	2.40182	1.56193	16.5861	3.64092	1.42769	6.75197	13.1728	2.34762	0.781025	5.15593	9.00003	11.1333	13.7281	32.2975	55.5512	14.5439	20.6739	15.8697	172.799	6.10119	12.9785
XLOC_067157	RING/FYVE/PHD zinc finger superfamily protein, putative isoform 2 [Theobroma cacao] >gi|508718296|gb|EOY10193.1| RING/FYVE/PHD zinc finger superfamily protein, putative isoform 2 [Theobroma cacao] >gi|508718298|gb|EOY10195.1| RING/FYVE/PHD zinc finger superfamily protein, putative isoform 2 [Theobro...	8.20984	8.45903	9.04342	9.45577	9.16509	8.64602	10.2314	8.77652	15.3527	20.9414	21.1173	15.9704	18.7385	14.919	11.7639	7.05811	4.0622	6.56665	13.3225	10.8856	10.9642
XLOC_052203	Biotin carboxylase 1, chloroplastic isoform 4 [Theobroma cacao]	8.58179	8.8783	9.44343	7.69037	13.0387	13.7446	9.68552	13.0716	0	0	0.19542	0.204191	0	2.57805	6.20967	14.9824	11.2482	22.1393	6.46133	1.34197	0.813443
XLOC_037358	hypothetical protein VITISV_034888 [Vitis vinifera]	66.1728	64.2566	56.8731	78.2446	30.9911	48.7365	0	17.5423	14.4738	150.418	276.028	241.536	76.8218	105.103	61.6764	7.32039	14.7306	5.77706	29.4951	54.6525	22.4941
XLOC_052236	protein with unknown function [Ricinus communis] >gi|223531036|gb|EEF32888.1| protein with unknown function [Ricinus communis]	8.998	5.38255	2.66738	3.59239	1.90826	3.73797	2.42591	8.62371	19.4061	0	0	0.0226271	0	0	4.70157	0	41.1582	22.6541	10.0423	23.2538	8.71594
XLOC_034311	PREDICTED: phospho-N-acetylmuramoyl-pentapeptide-transferase homolog [Fragaria vesca subsp. vesca]	0.131027	0.508211	0.293495	0.187639	0.422092	1.59472	0.706302	0.173143	0	0	0.500743	0	0	0	0	0	1.7039	0	0	0	0
XLOC_084891	PREDICTED: abnormal spindle-like microcephaly-associated protein homolog [Solanum lycopersicum]	39.5432	43.7487	29.4537	76.298	46.3805	38.6262	1.43732	11.4474	2.7348	9.81169	10.1644	3.93669	4.17958	0	0	0	0	0	4.51517	3.20765	3.68107
XLOC_055196	PREDICTED: molybdenum cofactor sulfurase-like [Setaria italica]	1.73489	1.32204	2.29913	1.77302	2.00481	2.06909	2.4992	1.94269	0.989233	0.763671	1.15299	1.25624	1.05446	0.439521	0.665165	0	0.432275	0	0.288122	0.238868	0.598932
XLOC_082376	uncharacterized protein LOC100216906 [Zea mays] >gi|194696966|gb|ACF82567.1| unknown [Zea mays]	1.13662	2.01312	1.06079	1.56228	1.06737	1.27456	3.34757	3.38682	1.9897	3.14608	2.01298	1.81774	1.46376	14.5477	15.6385	7.5196	8.13497	35.7276	14.0078	7.95581	8.24247
XLOC_042484	PREDICTED: probable leucine-rich repeat receptor-like protein kinase At5g49770-like [Setaria italica]	7.66448	5.92416	16.1453	7.26635	8.81663	8.0174	4.63085	4.08918	0	0	0	0	0	0.314825	0	0	0.750396	0	0	0	0
XLOC_094013	PREDICTED: uncharacterized protein LOC100266068 [Vitis vinifera]	33.4001	30.3256	22.9648	26.7798	24.7375	25.7992	11.944	5.20611	60.7762	62.0651	49.9111	70.4822	52.3317	25.2744	20.7252	3.65473	3.89986	3.36183	14.4787	18.0334	22.5952
XLOC_072469	PREDICTED: uncharacterized protein LOC101781046 [Setaria italica]	0.682454	0.887067	0.566804	1.14952	0.838276	1.08317	0.422435	2.918	4.02166	4.89403	6.9562	6.84069	4.862	13.7952	10.2801	3.61884	3.99747	1.53198	2.49979	6.3716	9.30933
XLOC_063586	PREDICTED: mRNA-decapping enzyme subunit 2-like [Setaria italica]	2.30969	1.36075	1.46594	2.49726	1.42704	2.21213	8.73793	4.17035	6.25071	3.85479	4.70584	3.72017	4.75936	2.01199	3.53816	0	0	1.70536	1.08451	2.70037	3.65524
XLOC_041864	unknown [Zea mays]	12.2805	15.3157	11.1159	13.0898	9.76455	11.083	32.6404	26.7667	3.23482	11.671	12.8512	11.5561	16.3318	11.7675	10.7236	16.8264	28.4418	6.79058	8.69471	17.7275	12.9359
XLOC_023331	PREDICTED: polypyrimidine tract-binding protein homolog 1 isoform 2 [Vitis vinifera]	13.0037	8.15468	11.4567	10.1154	10.848	8.71434	8.50626	7.0569	23.207	30.3485	34.1479	29.6344	21.2109	22.2896	20.6051	4.24249	2.54549	5.85684	4.6109	5.791	9.07097
XLOC_049413	PREDICTED: multidrug and toxin extrusion protein 2-like [Vitis vinifera]	0.55512	0.101333	0.341155	0.886019	0.42182	0.490869	0.785345	1.38953	0	0	0	0	0	0	0.268442	0.965355	0.921045	0	3.74595	8.95719	8.00902
XLOC_036819	PREDICTED: 3-hydroxyisobutyryl-CoA hydrolase-like protein 5-like [Brachypodium distachyon]	1.21602	1.49193	1.02622	0.765319	1.6178	0.626741	2.06589	2.09065	0	0.274711	0.137872	0.268356	0.0587319	1.22475	0	0	0	0	0.321685	0.649761	5.21936
XLOC_031767	hypothetical protein PRUPE_ppa000066mg [Prunus persica]	6.07479	6.20054	6.90515	6.76905	7.90417	5.3762	9.29684	6.39134	0	0.429289	0.371032	0.237491	0.47671	0.0887752	0.134177	0	0	0.424177	1.38773	0.0959727	0.0496912
XLOC_000836	CBL-interacting serine/threonine-protein kinase 1 isoform 1 [Theobroma cacao]	10.8968	16.1314	26.8427	10.4506	9.8765	12.2457	1.69017	1.70547	20.6436	11.6435	13.6648	7.77108	8.72795	9.9702	15.5693	4.46014	2.94395	4.06537	16.3259	3.38218	4.55219
XLOC_070083	ATP-dependent RNA helicase SUPV3L1 isoform 1 [Theobroma cacao]	3.44088	3.19855	3.07814	4.51431	3.99989	3.3125	1.57331	2.09946	2.32127	3.12556	2.6618	2.46507	2.46084	1.92137	1.32675	1.91049	4.16924	3.58101	3.35809	14.1245	14.7323
XLOC_037883	PREDICTED: 3-ketoacyl-CoA synthase 17-like [Fragaria vesca subsp. vesca]	0.691251	0	1.24211	0.596708	0.668477	0.936128	0	1.27359	0	0	0	0	0	0	0	0	0	0	0	0.937658	0.209137
XLOC_003785	PREDICTED: uncharacterized protein LOC100263484 [Vitis vinifera] >gi|296083051|emb|CBI22455.3| unnamed protein product [Vitis vinifera]	18.9422	14.4606	13.3429	21.5541	16.4187	15.1279	25.8567	9.74108	17.5868	20.1446	20.2352	17.584	18.6938	20.9291	20.2408	25.4819	16.5234	32.512	14.99	12.4446	15.8668
XLOC_063533	cytochrome P450, putative [Ricinus communis] >gi|223550413|gb|EEF51900.1| cytochrome P450, putative [Ricinus communis]	0	0	0	0	0	0	0	0	0.441296	0	0	0	0	0.55942	0	39.9379	0	33.5506	0	1.01175	0
XLOC_093126	predicted protein [Populus trichocarpa] >gi|222847941|gb|EEE85488.1| predicted protein [Populus trichocarpa]	4.49128	3.43445	3.35183	4.75382	4.11077	3.54472	1.39396	2.16702	5.34012	3.96933	2.85837	4.21818	2.65636	1.81327	0.653288	0	0.000183643	0	0.728541	1.99285	2.44903
XLOC_004770	uncharacterized protein LOC100527050 [Glycine max] >gi|255631446|gb|ACU16090.1| unknown [Glycine max]	1.64136	1.69439	1.55029	0.622749	2.17745	1.79529	4.27764	2.62162	0	0.101303	0.103713	0	0	0.142309	0	0	0	0	0	0	0
XLOC_058685	uncharacterized protein LOC100780915 precursor [Glycine max] >gi|255636246|gb|ACU18463.1| unknown [Glycine max]	0.651979	0	3.74341	0.961795	0	0.189872	1.10842	0	0.150849	3.3373	1.1019	2.78095	1.25716	4.31715	1.80118	0	0	0	5.69375	0	0.143944
XLOC_016274	PREDICTED: eukaryotic initiation factor 4A-8-like [Cucumis sativus] >gi|449476633|ref|XP_004154791.1| PREDICTED: eukaryotic initiation factor 4A-8-like [Cucumis sativus]	96.2737	86.692	99.0361	98.7481	87.9264	81.7809	177.954	147.91	77.0021	105.08	121.496	107.038	100.693	186.525	258.027	106.67	101.06	129.662	184.182	193.244	234.547
XLOC_057058	PREDICTED: ribose-phosphate pyrophosphokinase 3, mitochondrial-like [Cucumis sativus]	9.58654	8.66025	6.19938	9.8683	9.63714	10.9993	6.81951	8.2192	27.6256	10.6404	12.1163	10.6558	8.86724	38.3385	63.0094	6.23171	6.79535	4.6285	3.17227	14.6598	16.0585
XLOC_088233	MRP-like ABC transporter [Arabidopsis thaliana]	13.727	12.7649	13.7275	20.4498	16.4127	17.1648	22.5589	10.9614	25.1324	17.6723	17.3143	15.1902	13.7498	10.7967	13.8437	2.26325	1.13163	0	2.20866	9.80272	13.639
XLOC_077173	Sucrose nonfermenting 4 [Theobroma cacao]	27.8558	27.4743	32.3717	42.5571	44.0956	29.9415	15.9374	13.1203	0	0	0	0	0	0	0	0	0	0	0	0	0
XLOC_091895	PREDICTED: uncharacterized protein LOC101768438 [Setaria italica]	1.38407	0.303814	1.20991	1.1386	1.45726	1.68154	1.08407	3.05211	0.049442	0.242475	0.184856	0.312813	0.614412	0	0.696672	0	0	0	0.847008	0.433518	0.233868
XLOC_090512	Histone superfamily protein [Theobroma cacao]	308.938	213.563	112.783	231.18	228.81	172.018	3.99997	24.6873	12.4641	14.0781	12.8386	10.066	3.55902	3.25786	18.4036	14.0257	17.9087	25.0589	32.0004	19.4631	33.9232
XLOC_081158	PREDICTED: uncharacterized protein LOC100260976 [Vitis vinifera]	11.0627	8.84294	10.1843	11.2355	9.70964	9.24223	10.8164	6.92757	10.0133	21.3792	23.9342	13.3974	13.3471	22.9176	23.2689	1.66235	0.749874	1.20815	12.3661	5.53293	8.6584
XLOC_027162	PREDICTED: uncharacterized protein LOC100829496 [Brachypodium distachyon]	7.44564	9.87337	7.02137	11.982	12.1836	5.18363	7.32552	4.30359	15.5151	11.429	9.06148	14.7552	7.75905	18.0689	7.71488	9.4206	6.2844	2.05575	0	13.1002	11.6086
XLOC_053588	PREDICTED: serine/threonine-protein phosphatase 6 regulatory subunit 3-like isoform X1 [Setaria italica]	12.8194	11.8037	12.721	12.279	14.7453	15.0143	11.1659	8.97288	17.8895	30.5173	25.0326	28.7991	29.9853	24.0848	12.7962	8.69117	7.45347	7.51263	9.09053	17.7684	20.8041
XLOC_008504	PREDICTED: neutral alpha-glucosidase AB-like [Cicer arietinum]	6.50126	4.13447	6.09732	7.64955	7.10529	5.73985	44.6593	33.9717	0	0	0	0.255644	0	0.345163	0	0	0	0	0	0	0
XLOC_069978	PREDICTED: uncharacterized protein LOC100255542 [Vitis vinifera]	32.8693	27.9036	23.9495	29.0968	26.9526	23.5292	6.62247	13.2905	20.2351	14.3377	13.3123	13.3008	9.51535	11.904	5.40284	9.37408	2.71834	7.16369	15.8667	13.156	18.625
XLOC_039405	MADS box protein [Phalaenopsis equestris]	3.24788	2.21625	3.75317	4.11385	3.61784	3.09525	0.940896	1.04877	1.96876	1.90177	1.21704	2.25395	1.18513	4.07922	4.20297	5.24757	9.17818	3.46174	3.7936	0	0.0389973
XLOC_018800	hypothetical protein PRUPE_ppa025991mg [Prunus persica]	0.0473704	0.270326	0.514238	0.12862	0	0.630266	0.355827	0.0657171	0	0.378423	0.220971	0.264568	0.192707	0.614389	0	0	0	0	0.188091	0.0583926	0
XLOC_010744	PREDICTED: metal tolerance protein 5-like isoform 2 [Solanum lycopersicum]	37.6805	28.9015	41.0895	38.4831	32.3894	29.1739	34.0017	26.4439	3.4276	15.9736	14.8342	14.9275	16.0762	95.4746	129.309	64.1205	62.0713	63.6657	30.3262	32.145	39.8359
XLOC_038779	mitogen-activated protein kinase (MAPK), putative [Musa acuminata]	3.44853	4.07397	5.05805	2.65536	4.17066	3.9281	9.26273	9.37194	3.62762	0.0205799	0.58742	0.468501	0.623545	0.138621	0.948351	7.02089	5.40712	8.47299	8.84007	0.137832	0.157655
XLOC_082157	TPA: hypothetical protein ZEAMMB73_338626, partial [Zea mays]	37.1431	43.5515	48.237	40.1376	43.9418	51.4202	29.6922	29.7209	29.1098	58.5085	59.5787	72.3405	50.5935	59.893	72.2744	46.9545	49.0345	54.6724	34.5469	35.1238	32.952
XLOC_077487	conserved hypothetical protein [Ricinus communis] >gi|223542493|gb|EEF44033.1| conserved hypothetical protein [Ricinus communis]	0	1.56646	6.17041	1.30855	2.59874	2.25904	4.93719	3.42511	0	14.0444	34.8288	26.7852	57.9599	20.7434	21.4451	5.80721	5.1288	12.6121	1.404	1.91408	2.46844
XLOC_012241	S-adenosyl-L-methionine-dependent methyltransferases superfamily protein isoform 2 [Theobroma cacao]	0.679729	0.64806	1.07282	0.652982	0.348426	0.948175	1.84665	2.52967	0.0378564	0.532643	0.324191	0.171803	0.218034	0.0514464	0.362581	0	0.41528	0.623967	0.228391	0.56952	0.320117
XLOC_016770	hypothetical_protein [Oryza glaberrima]	2.1777	1.89144	1.22834	1.68703	1.98505	2.26829	2.16494	2.34146	0	1.27144	0.572314	0.433688	2.22905	2.96635	2.31884	3.12304	4.25767	2.23937	6.07942	2.98706	2.81066
XLOC_083144	PREDICTED: coiled-coil domain-containing protein 132-like [Cucumis sativus]	0.266025	0.516153	0.298168	0.762902	0.85713	0.719786	3.23237	1.22898	0	0	0	0	0	0.22968	0	0	0	0	1.95014	0.151076	0
XLOC_087023	hypothetical protein ZEAMMB73_993080 [Zea mays]	4.03873	3.18512	9.68147	4.52926	6.49339	6.93492	11.6123	12.9883	30.1433	46.46	39.1492	40.7144	63.1151	0.98838	2.268	3.60873	11.631	8.33508	12.2223	10.8786	14.7712
XLOC_007189	B-box type zinc finger family protein [Theobroma cacao]	64.7306	61.4099	80.8316	68.6549	69.6355	49.1469	23.4327	23.1661	9.99399	14.4831	13.2964	17.219	18.8552	50.4643	141.124	63.2826	57.0257	26.8471	19.6761	11.7215	18.3107
XLOC_024834	unnamed protein product [Oryza sativa Japonica Group]	4.70737	3.48939	3.80284	3.54664	3.27279	3.42324	3.54606	2.50464	8.66543	13.4599	14.277	13.6501	13.3368	7.63436	11.9372	32.9596	54.3294	39.9693	9.46833	9.82434	10.4676
XLOC_047949	hypothetical protein OsI_23742 [Oryza sativa Indica Group]	12.9109	10.3866	13.3148	13.2716	11.6595	12.5867	21.3241	25.9143	36.7581	36.0873	38.063	43.033	47.8564	19.7618	35.2182	75.2863	68.2778	75.9963	80.4238	33.8677	50.0834
XLOC_013401	PREDICTED: cyclic nucleotide-gated ion channel 4-like [Solanum lycopersicum]	167.403	270.348	301.44	193.425	176.518	292.713	88.4239	35.6325	49.3396	110.218	89.2197	147.56	107.624	237.632	226.792	8.4353	11.5482	2.0514	79.2773	0	0
XLOC_023691	P-loop containing nucleoside triphosphate hydrolases superfamily protein [Theobroma cacao]	4.01637	4.0905	6.48867	2.56701	2.88993	3.23341	0.166772	0.625761	26.7296	22.1638	35.9656	47.8426	27.6786	3.98547	1.32679	0.648259	0.651368	0.472781	5.03057	0.322641	1.20657
XLOC_015920	PREDICTED: UDP-glycosyltransferase 73C5-like [Setaria italica]	0.160319	0	9.50285	0.715842	1.32016	1.27546	15.5298	13.7066	0	0.164452	0	0	0	23.5676	74.666	11.9089	6.49235	49.0967	14.1063	43.1104	53.9161
XLOC_017717	Os02g0796500 [Oryza sativa Japonica Group] >gi|47497030|dbj|BAD19083.1| putative response regulator 9 [Oryza sativa Japonica Group] >gi|47497239|dbj|BAD19284.1| putative response regulator 9 [Oryza sativa Japonica Group] >gi|113537920|dbj|BAF10303.1| Os02g0796500 [Oryza sativa Japonica Group] >gi|11...	4.47058	4.586	4.09655	4.14123	3.5591	3.62503	4.51028	3.35116	3.0937	6.21773	6.29127	7.65077	3.25811	1.88603	1.46313	0.609736	4.97851	1.39016	0.695347	0.937969	0.89665
XLOC_077858	Phototropic-responsive NPH3 family protein isoform 2 [Theobroma cacao]	0.786029	1.12697	0.866286	0.711723	1.49988	1.00924	8.44622	11.8661	1.97138	4.98025	3.32023	4.03823	3.93837	6.25083	11.5418	5.45641	5.68727	8.01913	11.9651	20.3768	21.5662
XLOC_005897	PREDICTED: cation/calcium exchanger 3-like [Glycine max]	5.6368	6.2549	10.6044	5.18993	4.91014	5.73165	7.93788	6.00407	1.26439	4.30196	3.26841	4.78682	4.11894	6.73907	4.65342	0	0.408471	0	4.39083	1.4166	2.78784
XLOC_043629	PREDICTED: autophagy-related protein 18h-like isoform X1 [Setaria italica]	12.7492	13.1742	16.3687	12.5304	11.8346	12.8191	13.2998	8.703	22.2514	29.5791	34.1064	34.7267	32.6002	25.5944	17.9866	9.43763	6.72612	8.5892	9.10324	13.6022	19.0889
XLOC_019978	hypothetical protein PRUPE_ppa007908mg [Prunus persica]	7.97867	7.38912	8.06954	9.9622	7.61795	8.90238	6.42268	8.95914	13.2822	13.0039	13.304	13.769	16.009	7.39244	13.7039	2.39483	2.73788	6.22489	5.21672	2.91416	5.01291
XLOC_052875	PREDICTED: uncharacterized protein LOC100244119 [Vitis vinifera] >gi|296082148|emb|CBI21153.3| unnamed protein product [Vitis vinifera]	8.16603	8.29771	7.77818	6.20715	4.74913	4.22338	0.453308	0.21192	0	0	0	0	0	0	0	0	0	0	0	0	0
XLOC_048830	RecName: Full=Levopimaradiene synthase, chloroplastic; AltName: Full=Diterpene synthase; AltName: Full=GbTPS-Lev; Includes: RecName: Full=Levopimaradiene synthase; Includes: RecName: Full=Copalyl diphosphate synthase; Flags: Precursor >gi|15865605|gb|AAL09965.1|AF331704_1 levopimaradiene synthase [G...	10.1374	8.71233	10.8533	13.768	9.01147	8.81554	87.9759	147.944	0	0.179732	0.141958	0.0666868	0	0.485926	0	1.03464	0.342882	0.256143	0.576566	33.8536	46.3211
XLOC_015459	PREDICTED: uncharacterized protein LOC101292418 [Fragaria vesca subsp. vesca]	1.70995	3.05376	2.74769	1.93298	1.79981	2.39791	2.90085	0.916681	6.96248	4.54059	4.58491	4.96541	5.61404	4.68774	2.00035	1.6797	0	0	1.07433	1.13084	0.736468
XLOC_028575	predicted protein [Populus trichocarpa] >gi|222855523|gb|EEE93070.1| predicted protein [Populus trichocarpa]	0.0469784	0.0658721	0.0780645	0.0984851	0.169718	0.0801106	3.20043	2.73803	0	0	0	0.0660211	0	0.285192	0	0	0	0	0.0451836	0	0
XLOC_023547	tropinone reductase I, partial [Dendrobium nobile]	393.284	958.952	1155.79	1038.23	227.214	2051.88	0	0	0	0	0	0	0	0	0	0	0	0	0	0	0
XLOC_021574	global transcription factor group [Populus trichocarpa] >gi|222859377|gb|EEE96924.1| global transcription factor group [Populus trichocarpa]	18.4377	19.2195	20.6808	23.8735	19.8579	18.2475	12.1977	5.45511	9.38301	16.6567	16.347	14.7134	14.4037	28.4219	39.4256	15.7014	22.8744	27.2057	28.4574	17.8671	21.9432
XLOC_034313	PREDICTED: probable ATP-dependent RNA helicase DHX37-like [Vitis vinifera]	3.03121	2.42652	2.93285	1.94216	1.91997	2.4495	1.2603	1.25407	0	0	0	0	0	2.09169	0.296677	0	0	0	0.93477	0.254816	0.312947
XLOC_050990	PREDICTED: putative phospholipid-transporting ATPase 4-like [Brachypodium distachyon]	2.2534	4.33822	7.34116	3.24839	3.5299	4.20332	8.16381	8.67806	20.2358	10.3469	9.62535	12.9577	10.7202	17.3229	16.7656	0.95132	0.559806	1.35212	7.63948	16.2715	24.373
XLOC_063060	TPA: hypothetical protein ZEAMMB73_854946 [Zea mays]	9.75283	4.50255	3.47899	9.92231	9.0717	5.90201	0	0	27.8315	12.571	12.5125	9.24307	8.33614	0.139627	1.58816	0	0	0	0.666949	0.288113	0.319437
XLOC_004499	Pentatricopeptide repeat-containing protein, putative isoform 1 [Theobroma cacao] >gi|508784628|gb|EOY31884.1| Pentatricopeptide repeat-containing protein, putative isoform 1 [Theobroma cacao] >gi|508784629|gb|EOY31885.1| Pentatricopeptide repeat-containing protein, putative isoform 1 [Theobroma cac...	1.12143	0.80364	0.877035	0.278959	1.06249	0.665085	0.499012	0.197564	0.237862	0.366064	0.26069	0.401758	0.204947	0.163632	0	0.297772	0	0	0.0814998	0.0981311	0
XLOC_061047	Cytochrome c biogenesis protein family isoform 1 [Theobroma cacao]	2.86766	4.72836	5.14889	1.57488	4.19176	3.53235	4.09996	0.725257	0	1.06925	1.1674	0.441152	0.979135	1.63416	0	2.21519	0	0	0.779853	0.529572	0.863265
XLOC_013046	PREDICTED: HMG-Y-related protein A-like [Cicer arietinum]	5.54812	3.50077	5.08049	14.9664	2.71897	3.5599	5.46136	2.28576	0	7.00734	13.2579	12.1289	11.3877	15.8137	5.04787	2.10671	0	8.02997	23.9434	0.975449	3.39491
XLOC_054942	PREDICTED: folic acid synthesis protein fol1-like [Vitis vinifera]	3.06255	2.56419	3.11023	2.53473	2.46895	2.25426	4.27281	2.1532	4.49472	3.9728	3.6934	3.92154	2.49791	5.81336	7.56729	2.16772	3.15039	3.16943	3.12026	3.98578	7.31456
XLOC_001793	uncharacterized protein LOC100381628 [Zea mays] >gi|223944853|gb|ACN26510.1| unknown [Zea mays] >gi|414887964|tpg|DAA63978.1| TPA: putative phosphatidylinositol-4-phosphate 5-kinase family protein [Zea mays]	0.105951	0.0764621	0.369539	0.674233	0.670817	0.0234169	0.154905	0.082829	0.375302	0.902184	0.211998	0.363225	0	0.0626395	0.275541	0	0	0	0	0.374384	0.244362
XLOC_084601	hypothetical protein OsJ_16102 [Oryza sativa Japonica Group]	9.28233	0	0.329966	2.14869	9.43034	5.33151	8.02203	5.73975	0	0	0	0	0	0	0	0	0	0	0.190504	0.241171	1.84729
XLOC_036576	hypothetical protein M569_03532, partial [Genlisea aurea]	3.09994	1.92975	2.72227	3.21706	2.60903	2.69658	1.59315	0.105619	0	0	0	0	0	0	0	0	0	0	0	0	0
XLOC_063039	SQUAMOSA promoter-binding-like 5 [Erycina pusilla]	16.8611	13.4524	0	0.219711	9.81382	14.3063	0	0	0.287594	0.977247	1.05895	0.16357	1.56722	0.587022	0	0	0	0	1.44231	0	0
XLOC_059040	PREDICTED: uncharacterized protein LOC100787824 [Glycine max]	2.42679	5.583	11.7963	2.70165	2.60147	7.32471	3.38163	1.88924	4.11957	5.64081	5.57952	9.16162	5.77936	2.39039	3.8412	0	0	0	1.05113	0.829794	0.51358
XLOC_061867	Os02g0815001 [Oryza sativa Japonica Group] >gi|47847878|dbj|BAD21671.1| putative ribosomal protein L37 [Oryza sativa Japonica Group] >gi|125541603|gb|EAY87998.1| hypothetical protein OsI_09420 [Oryza sativa Indica Group] >gi|222623903|gb|EEE58035.1| hypothetical protein OsJ_08855 [Oryza sativa Japon...	28.63	23.7952	22.129	27.5094	28.0632	24.5476	8.69044	17.6266	7.63718	7.52751	13.8021	8.22995	13.1634	4.52358	13.5152	20.6497	7.51737	32.9865	8.47314	1.93465	6.2198
XLOC_068702	zinc finger protein-like protein [Gossypium hirsutum]	0	0	4.37404	0	1.9144	4.12473	0	0	33.2797	4.19613	15.4483	0	5.26055	43.4208	124.998	0	5.31651	8.18693	20.7187	2.44413	1.80185
XLOC_031265	hypothetical protein VITISV_035279 [Vitis vinifera]	11.7864	6.68531	7.36095	11.996	10.0419	12.7979	9.34005	14.9208	43.0483	0	38.3571	33.7119	27.0388	10.0949	1.38831	0.678244	1.30664	3.00883	5.86191	0	0
XLOC_047639	CMT-type DNA-methyltransferase [Elaeis guineensis]	35.0091	40.4346	26.1631	47.727	43.2073	39.0105	2.15644	5.81847	1.79234	1.04234	3.10915	0.344295	0.994256	0.768488	0.178126	27.5492	22.56	37.0122	1.77962	3.35168	2.96081
XLOC_003567	MYB transcription factor [Narcissus tazetta var. chinensis]	24.0001	26.7859	59.0403	19.2567	28.5313	30.9443	6.1482	1.56332	0	39.4151	19.8376	28.8634	65.6068	11.7576	9.08001	0	0	0	64.4879	1.0318	3.6287
XLOC_042466	unnamed protein product [Vitis vinifera]	0	13.2117	7.88701	24.2052	0	4.44405	0	0	37.1808	163.227	139.949	255.916	139.665	22.7021	8.4573	0	0	14.0977	1.53361	4.19197	2.84422
XLOC_059762	calmodulin-like protein [Elaeis guineensis]	0.061586	0.117532	0	0.16872	0.197184	0.0821656	1.56088	4.23605	0	0	0	0	0	0	0	0	0	0	0	0	0
XLOC_064262	Os03g0367000 [Oryza sativa Japonica Group] >gi|108708340|gb|ABF96135.1| Peptidylprolyl isomerase PASTICCINO1, putative, expressed [Oryza sativa Japonica Group] >gi|113548653|dbj|BAF12096.1| Os03g0367000 [Oryza sativa Japonica Group] >gi|215768523|dbj|BAH00752.1| unnamed protein product [Oryza sativa...	13.4604	12.5001	12.2615	18.8862	13.6412	15.6149	16.2477	11.225	24.2658	29.178	53.9071	71.3965	42.7908	30.5695	7.35067	28.0243	67.5079	35.9233	4.07337	15.1126	7.0209
XLOC_012977	predicted protein [Hordeum vulgare subsp. vulgare]	7.0718	12.4395	11.4937	6.71969	7.84976	13.6599	22.8943	17.8059	351.256	207.662	339.456	449.116	371.591	377.057	49.4366	13.0725	3.4747	8.28756	22.6448	13.3641	23.2309
XLOC_042511	conserved hypothetical protein [Ricinus communis] >gi|223545435|gb|EEF46940.1| conserved hypothetical protein [Ricinus communis]	61.3569	50.277	55.2604	71.6063	36.2424	51.9197	20.8383	15.5944	44.2413	57.508	59.9681	67.0882	46.2488	35.427	24.9004	0	0	2.63229	22.0358	30.6023	35.8982
XLOC_088436	unnamed protein product [Vitis vinifera]	3.88476	2.81914	5.3132	4.67375	3.27942	4.39601	4.72567	6.26989	0.738437	2.7824	1.74695	1.92041	1.89799	5.26802	13.2961	8.0497	5.61115	11.6592	6.85247	12.5498	8.78352
XLOC_062613	conserved hypothetical protein [Ricinus communis] >gi|223547567|gb|EEF49062.1| conserved hypothetical protein [Ricinus communis]	1.33921	1.31232	1.34362	1.09249	1.51674	1.35785	4.42835	6.03569	0.337086	1.99636	1.14492	0.643926	2.09059	2.85231	5.07234	0	0.61719	0	0.176374	0.289362	0.304815
XLOC_061644	PREDICTED: pre-mRNA-splicing factor ATP-dependent RNA helicase PRP16-like [Solanum lycopersicum]	6.46251	4.49706	5.40582	7.27823	5.61001	10.2793	4.54416	2.03233	0	0.0980393	0	0.296941	0.170012	0	0	0	0	0	0.746751	0.123493	0
XLOC_077249	PREDICTED: uncharacterized protein LOC100791212 [Glycine max]	0.212727	0.487856	0.586319	0.347104	0.354036	0.277877	0.316287	0.425984	0	0.110034	0.0913393	0.23396	0.19385	0.287302	0	1.03707	0.642684	0	0.279195	0.486184	0.734641
XLOC_037094	LOC100281987 [Zea mays] >gi|195618714|gb|ACG31187.1| auxin Efflux Carrier family protein [Zea mays] >gi|219887913|gb|ACL54331.1| unknown [Zea mays] >gi|413922971|gb|AFW62903.1| Auxin Efflux Carrier family isoform 1 [Zea mays] >gi|413922972|gb|AFW62904.1| Auxin Efflux Carrier family isoform 2 [Zea ma...	10.4881	11.4455	16.6406	12.0509	10.2956	12.1858	32.8974	19.4884	17.835	15.575	17.3933	16.8022	21.978	23.9468	13.1795	36.2607	35.5175	20.7066	28.061	8.49918	7.86532
XLOC_063268	predicted protein [Populus trichocarpa] >gi|222847285|gb|EEE84832.1| predicted protein [Populus trichocarpa]	8.17657	7.45822	9.69323	1.65216	8.83396	2.19894	25.7243	19.3696	0	0	0	0.237163	0.212755	3.14602	3.24162	0	0	0	0	0	0.0693703
XLOC_004170	Uncharacterized protein TCM_036737 [Theobroma cacao]	0.190439	0.727195	0.277287	0.522351	0.406563	0.25417	1.12805	0.174458	0.147857	0.880261	1.12882	0.64972	2.09202	0.416455	0.268893	0	0	0	0.841289	0.0770142	0.177985
XLOC_033243	PREDICTED: chlorophyll a-b binding protein 7, chloroplastic-like isoform 1 [Glycine max]	0.545433	2.07699	3.99385	2.8883	0	3.19785	3.13229	3.05862	2.44751	0.187743	1.05046	0.19613	0.172515	179.344	83.3389	7.20246	0	229.279	2.82961	5.29546	44.8201
XLOC_038633	hypothetical protein TRIUR3_24074 [Triticum urartu]	17.1117	15.5221	9.30828	19.5874	16.2944	15.5912	3.06859	4.93333	0.722707	0.124657	0	0.0595165	0.158074	0.182726	0.584294	0	0	0	0.146197	1.10428	0.936654
XLOC_076432	hypothetical protein PRUPE_ppa008405mg [Prunus persica]	26.4374	36.4866	40.5768	19.9909	40.2793	25.6718	46.2175	64.5011	9.88612	37.1695	48.2806	33.0723	42.8593	8.82548	32.8924	1.45198	0	30.2226	29.625	0.118283	51.0983
XLOC_043017	predicted protein [Populus trichocarpa] >gi|222856116|gb|EEE93663.1| predicted protein [Populus trichocarpa]	1.5355	1.43351	1.20654	2.18398	1.81951	2.07052	1.15207	1.63152	1.86956	1.67368	1.84472	1.9571	0.864479	1.92048	0.811726	0	0	0	1.49442	1.34959	1.96379
XLOC_011492	hypothetical protein PRUPE_ppa002292mg [Prunus persica]	0.608739	0.998445	0.656233	1.01891	1.38183	0.794165	0.687829	0.25161	2.979	5.83e-05	0.376332	0.831318	0.53517	0.219479	0.327481	0	0.297278	0.0927163	0.580033	0.351554	0.186031
XLOC_029063	putative DNA binding protein [Atriplex canescens]	0	0	0	0	0	0	1.16662	2.24856	0	0	0	0	0	0	0	0	0	0	0	0	0
XLOC_061366	unknow protein [Oryza sativa Japonica Group] >gi|222630175|gb|EEE62307.1| hypothetical protein OsJ_17096 [Oryza sativa Japonica Group]	7.66931	7.63058	5.71695	9.7634	8.51989	7.42937	3.83955	3.82745	9.24327	7.96824	8.52548	7.23955	5.15886	11.8071	6.9274	4.27532	4.32904	6.82554	8.32731	6.32212	9.05954
XLOC_068343	hypothetical protein OsJ_20171 [Oryza sativa Japonica Group]	12.1186	11.3038	13.4252	15.1354	11.6439	17.4058	20.8558	28.1553	26.1996	17.3902	21.8703	24.3409	18.7545	12.7189	11.0954	9.86311	9.6551	17.229	20.6236	15.2538	19.6436
XLOC_062818	Cell division protein ftsH, putative isoform 1 [Theobroma cacao]	1.91795	2.27909	1.57891	2.38924	2.47226	1.42067	8.70926	3.74548	7.76091	1.84037	2.8327	3.44779	3.43347	7.85915	14.7259	1.36146	0	5.09236	2.57918	6.23758	5.03312
XLOC_051782	Os05g0495900 [Oryza sativa Japonica Group] >gi|52353484|gb|AAU44050.1| putative beta-1,3-glucanase [Oryza sativa Japonica Group] >gi|113579485|dbj|BAF17848.1| Os05g0495900 [Oryza sativa Japonica Group] >gi|215697342|dbj|BAG91336.1| unnamed protein product [Oryza sativa Japonica Group]	0.480827	0.39002	2.23789	0.648777	0.199657	0.612954	67.2905	92.0259	0	2.86594	1.24032	2.27793	1.46005	12.3235	5.97127	42.4707	25.4055	65.2811	60.1032	138.419	132.132
XLOC_064956	predicted protein [Populus trichocarpa] >gi|222852061|gb|EEE89608.1| predicted protein [Populus trichocarpa]	4.53046	4.66777	4.91273	5.46616	5.90327	4.56819	10.3365	9.28285	8.17484	7.50245	7.96705	6.62352	8.98446	12.256	9.17813	8.05357	6.79254	8.61173	8.1477	7.34237	11.8823
XLOC_021356	cytochrome p450 85a1 [Oryza sativa Indica Group]	11.0142	10.8778	8.88709	4.53667	5.16222	6.32157	157.313	21.4801	2.42543	1.42555	0	3.38847	1.25278	87.0861	17.1493	3.80142	7.91058	11.0347	0.990113	2.47565	3.52835
XLOC_056853	PREDICTED: uncharacterized protein LOC101258200 isoform 1 [Solanum lycopersicum] >gi|460369654|ref|XP_004230672.1| PREDICTED: uncharacterized protein LOC101258200 isoform 2 [Solanum lycopersicum]	2.64049	1.47874	6.94154	3.2647	1.17459	2.98444	0	2.87119	0.215241	8.05678	7.08441	7.69341	17.1017	0.344265	0	0	0	4.17833	1.23352	1.21491	1.638
XLOC_048730	PREDICTED: uncharacterized protein LOC101774615 isoform X1 [Setaria italica] >gi|514779806|ref|XP_004969443.1| PREDICTED: uncharacterized protein LOC101774615 isoform X2 [Setaria italica] >gi|514779810|ref|XP_004969444.1| PREDICTED: uncharacterized protein LOC101774615 isoform X3 [Setaria italica] >...	0.180364	0.0937733	0	0.557508	0	0.0572828	7.59839	14.137	0	0	0	0	0.151482	0.256197	0	0	0	0	0	0	0
XLOC_008162	PREDICTED: prolycopene isomerase, chloroplastic-like [Vitis vinifera]	4.13443	2.86111	3.57355	4.92605	5.73932	3.97558	64.7244	8.06723	0	0	0	0	0	0	0	0	0	0	0	0	0
XLOC_006432	HIT-type Zinc finger family protein isoform 1 [Theobroma cacao]	2.83142	2.48717	2.37636	1.79312	1.79952	2.71424	3.18214	4.01051	0.142738	0.326594	0.625087	0.323812	0.521874	0.245549	0.891791	0	0	0.515418	0.62881	0.096683	0.615214
XLOC_017534	Os02g0618400 [Oryza sativa Japonica Group] >gi|47847548|dbj|BAD21600.1| putative MYB transcription factor [Oryza sativa Japonica Group] >gi|47847677|dbj|BAD21458.1| putative MYB transcription factor [Oryza sativa Japonica Group] >gi|113536980|dbj|BAF09363.1| Os02g0618400 [Oryza sativa Japonica Group...	0.0589808	0.0521009	0.712837	0.198847	0.0437754	0.253503	0.506723	1.94876	0	0.254454	0.458378	1.21247	0.796087	0.443639	0.137015	3.53589	6.78879	6.29666	1.23016	0.694749	0.973154
XLOC_019295	unknown [Zea mays]	6.63735	7.64128	4.02465	6.11388	5.92734	6.16157	5.67978	1.63646	0.254103	5.30462	5.81059	3.99795	4.79623	4.21943	4.34551	0	0	0	1.09493	0.309764	2.16329
XLOC_011929	hypothetical protein F775_01918 [Aegilops tauschii]	8.62907	7.04208	7.56048	8.4724	8.53688	8.43411	6.5724	14.697	9.8657	4.4649	4.94958	4.68865	3.83864	2.79425	3.54669	4.12125	8.61122	5.38168	4.02602	10.1278	9.33478
XLOC_001351	Phosphoenolpyruvate carboxylase family protein isoform 2 [Theobroma cacao]	22.5579	19.0494	14.4755	21.5937	19.9015	19.3011	1.75456	7.62487	7.85546	2.62296	3.16295	2.02272	1.16751	5.80785	16.875	2.87342	0	1.16949	7.57871	15.9191	12.1423
XLOC_024793	PREDICTED: ATP-citrate synthase beta chain protein 1-like [Cicer arietinum]	132.087	164.771	179.926	235.482	176.413	218.397	6.65248	48.4888	24.1148	417.656	544.502	673.296	302.662	158.531	27.5414	7.85576	0	0	71.7278	107.072	36.1296
XLOC_026278	PREDICTED: uncharacterized protein LOC100791618 [Glycine max]	11.9221	11.2394	9.04808	15.4621	10.8482	13.8764	11.4	11.2157	13.1667	9.10117	11.2942	9.71683	9.41918	6.41138	9.00079	5.09049	4.32601	0.927728	3.19085	8.62633	7.00905
XLOC_022748	predicted protein [Populus trichocarpa] >gi|222849087|gb|EEE86634.1| predicted protein [Populus trichocarpa]	2.54847	4.96747	6.28895	4.21498	3.07085	4.55749	2.30566	8.79734	0.158562	3.24991	2.26216	4.17914	5.41377	0	0.840529	0	0	1.61281	2.20047	2.21336	2.00642
XLOC_046750	unnamed protein product [Vitis vinifera]	0.782368	1.61081	0.406279	0.518691	1.36138	1.00346	0.780774	0.399096	2.65442	0.214762	0.437564	0.412357	0.092077	0	0.22149	0	0	0	0	3.16624	2.17802
XLOC_077081	UPF0463 transmembrane protein C6orf35, putative [Theobroma cacao]	23.5314	14.1106	15.8767	21.6865	19.1213	13.5106	21.1183	32.3193	22.0148	10.8598	10.1026	9.77753	9.73022	13.165	16.4706	171.317	140.352	174.761	33.8336	63.8126	67.2838
XLOC_088832	unknown [Zea mays] >gi|413936671|gb|AFW71222.1| heat shock factor protein 1 [Zea mays]	4.55565	3.77852	4.83585	4.06051	4.03044	3.33034	66.7169	14.7411	0.592574	1.50045	1.94386	2.71225	2.38468	7.034	21.5674	10.1128	5.54407	6.4822	1.2022	0.217084	0.168009
XLOC_077381	(1-4)-beta-mannan endohydrolase (mannan endo-1,4-beta-mannosidase), putative [Musa acuminata]	0.419242	0.197461	0.113817	0.568736	0.584793	0.0696661	0.805005	2.3315	0	0.121297	0	0	0	0	0	0	0	0	0	0	0
XLOC_060945	beta-galactosidase, putative [Ricinus communis] >gi|223530194|gb|EEF32103.1| beta-galactosidase, putative [Ricinus communis]	0.238545	0	1.04144	0.266022	0.0556045	0.230121	7.69007	2.32068	0.135589	0.0875402	0.000288618	2.79712	2.00343	0.461617	0	0	0	0	0	0	0
XLOC_073761	Os02g0152500 [Oryza sativa Japonica Group] >gi|51535338|dbj|BAD38597.1| putative coiled-coil protein [Oryza sativa Japonica Group] >gi|51535981|dbj|BAD38062.1| putative coiled-coil protein [Oryza sativa Japonica Group] >gi|113535449|dbj|BAF07832.1| Os02g0152500 [Oryza sativa Japonica Group] >gi|1255...	0.583972	0.42876	0.806057	0.80827	0.851183	0.684096	1.1494	0.726391	6.19612	1.59895	1.42226	2.96325	2.01361	1.52252	1.58845	4.41e-05	3.73e-06	0	0.444166	0.577138	0.561223
XLOC_047162	PREDICTED: uncharacterized protein LOC100792221 [Glycine max]	8.39421	7.34711	9.07039	5.56239	5.30024	4.51296	33.4233	16.6772	2.06689	6.03421	5.16698	5.24432	8.27628	34.2645	57.1935	23.0476	22.2642	23.7246	18.6305	27.6781	44.9594
XLOC_029129	NPR1-like protein [Musa ABB Group] >gi|209974204|gb|ACJ04031.1| NPR1-like protein [Musa ABB Group]	0.955593	0.637853	0.325331	1.33473	0.441818	1.51667	1.18278	1.1971	2.5637	4.02549	5.2863	6.52635	8.29211	9.66255	4.5071	20.7321	15.1395	31.0288	3.0714	1.32966	1.90927
XLOC_043501	oxidoreductase, short chain dehydrogenase/reductase family protein, expressed [Oryza sativa Japonica Group] >gi|215686892|dbj|BAG89742.1| unnamed protein product [Oryza sativa Japonica Group]	0	0.173596	0.199381	0.247976	0.430635	0.242797	0.241396	0.128903	3.89081	0.575778	0.950054	0.85594	1.20942	1.65122	1.59799	1.03135	0	0	0.543966	0.672309	1.9053
XLOC_067010	GDSL esterase/lipase [Aegilops tauschii]	0	0.242084	0.28095	0	0	0	0.318184	6.60688	14.4113	0.574139	0	0	0	15.0453	14.6052	0	3.25319	2.77005	3.09581	17.6403	10.0845
XLOC_000746	hypothetical protein ARALYDRAFT_483801 [Arabidopsis lyrata subsp. lyrata] >gi|297326081|gb|EFH56501.1| hypothetical protein ARALYDRAFT_483801 [Arabidopsis lyrata subsp. lyrata]	0	0	0	0.356328	0.394971	0	0	0	0	0.627802	0.322924	1.52708	0.269893	0.453084	0.49999	0	0	0	0.304854	0	0
XLOC_012857	elongation factor 1 [Elaeis guineensis]	178.958	144.943	133.59	221.83	143.542	161.382	304.583	163.561	356.284	343.875	436.384	399.796	301.257	269.575	328.312	55.7839	42.7272	42.0248	216.506	313.819	529.738
XLOC_088826	unnamed protein product [Vitis vinifera]	0.56772	0.0655362	1.11012	0.948607	0.00154052	1.92877	8.97455	4.59454	0	1.67492	4.50476	5.94979	3.84095	3.42049	0	0	2.84511	2.98758	45.5259	0	2.39161
XLOC_080559	dolichol-phosphate mannosyltransferase, putative [Ricinus communis] >gi|223551372|gb|EEF52858.1| dolichol-phosphate mannosyltransferase, putative [Ricinus communis]	23.8467	24.7277	22.1676	22.9144	23.2743	22.4824	10.782	11.8775	16.228	23.9794	29.4727	27.9825	21.4349	20.5343	21.4792	9.59331	7.11729	6.95486	16.6959	1071.95	41.1061
XLOC_021907	Isocitrate lyase [Medicago truncatula] >gi|355496040|gb|AES77243.1| Isocitrate lyase [Medicago truncatula]	3.01178	3.24923	4.97838	1.98579	3.56534	4.72334	29.1035	15.4289	0	0	0	0	0	0	0	0	0	0.652631	0	0	2.38398
XLOC_003584	PREDICTED: uncharacterized protein LOC100800380 [Glycine max]	249.906	258.19	380.237	346.169	230.256	193.373	96.0255	39.0268	102.842	110.69	120.344	126.172	115.666	5.42465	58.1749	8.62049	8.62049	7.13842	1257.13	125.213	172.757
XLOC_077102	PREDICTED: cancer-related nucleoside-triphosphatase homolog [Fragaria vesca subsp. vesca]	3.39328	2.91167	3.49058	2.22678	4.67463	3.00129	30.7807	32.6294	20.9865	36.7632	35.4765	14.401	24.1929	61.8238	12.687	26.9423	30.7948	14.7023	11.1029	17.0352	19.6659
XLOC_078389	hypothetical protein ZEAMMB73_764456 [Zea mays]	0.237993	0.327835	1.31383	0.457479	0.52175	0.401861	0.791017	0.209654	0.245696	0.998353	0.739622	0.638559	0.198769	1.20649	1.50293	0	0	0.811329	1.78001	3.60396	2.67266
XLOC_012407	PREDICTED: endo-1,4-beta-xylanase A-like [Brachypodium distachyon]	0.0563371	0	0	0.037787	0	0.0746805	0	0	0	0.0633567	0.193346	0.277308	0.254055	0	0	0	0	0	0.632814	1.02661	1.21757
XLOC_036260	hypothetical protein OsI_09561 [Oryza sativa Indica Group]	22.9109	16.6709	11.0485	24.9956	21.9701	16.7163	1.43258	2.46361	3.91613	3.95759	4.55389	2.12899	2.34499	1.74311	0.861606	0	0.600939	0.488576	3.57956	2.25853	3.3572
XLOC_012389	PREDICTED: uncharacterized zinc finger protein At4g06634-like [Cucumis sativus]	4.94895	23.3455	3.82208	22.119	9.059	1.51989	33.3187	16.1927	0.303375	1.71332	1.41723	1.39111	3.85906	0	3.27072	0	0	0	5.60754	1.72172	0.128425
XLOC_013119	conserved hypothetical protein [Ricinus communis] >gi|223538656|gb|EEF40257.1| conserved hypothetical protein [Ricinus communis]	0.383368	0.988702	0	0	0.694823	0	0	0	0	1.09463	1.64135	1.62275	1.4498	1.30957	0.817314	0	0	0	1.05646	0.235186	0.704344
XLOC_023760	hypothetical protein SORBIDRAFT_03g018900 [Sorghum bicolor] >gi|241927640|gb|EES00785.1| hypothetical protein SORBIDRAFT_03g018900 [Sorghum bicolor]	1.18712	0.806714	1.18344	1.42525	0.884734	1.33922	0.687376	0.311231	1.74768	1.77153	1.58281	1.60715	1.14986	0.678444	0	0	0	0	0	0	0.295948
XLOC_072201	unknown [Zea mays]	5.27254	5.21441	6.65623	7.08391	6.20124	4.41164	79.3805	36.1117	15.6546	10.7688	13.7319	12.9726	16.7795	31.9219	21.264	10.4745	15.5048	7.66321	5.63838	18.9721	24.3381
XLOC_072124	hypothetical protein OsI_32136 [Oryza sativa Indica Group]	0.213323	0.389049	1.0609	0.496877	0	0	7.77753	4.67872	19.7127	20.4654	15.4359	18.3105	22.3476	20.9965	10.8316	2.19993	1.80094	1.34121	8.75534	9.3056	7.14563
XLOC_065634	uncharacterized protein LOC100383871 [Zea mays] >gi|224032651|gb|ACN35401.1| unknown [Zea mays]	11.9867	10.8391	9.18589	13.6215	11.1401	8.23036	13.7962	7.24337	4.37692	3.09275	5.87629	3.5499	1.55677	2.42197	2.36299	0	0	0	1.55629	0.148829	2.33726
XLOC_044112	unknown [Lotus japonicus]	27.4219	29.1645	22.6876	29.636	31.0323	25.8554	54.0609	31.6691	2.91309	23.7836	34.1259	17.3691	30.8549	20.5935	28.2913	78.4382	148.195	105.983	57.499	24.7147	33.3138
XLOC_069044	PREDICTED: F-box/LRR-repeat protein 20-like [Brachypodium distachyon]	6.40205	5.64391	8.61376	6.20585	6.70377	4.60267	9.6138	5.6272	8.30493	5.70189	6.25816	6.12621	3.28313	7.21103	11.2396	3.02551	5.22116	5.22393	3.7613	6.3814	4.33112
XLOC_039106	4-coumarate-CoA ligase [Medicago truncatula] >gi|355513994|gb|AES95617.1| 4-coumarate-CoA ligase [Medicago truncatula]	0.638537	1.33107	0	0	0	0	0	0	0	0	0	0	0	0	0	0	0	0	0	0	0
XLOC_043534	unknown [Lotus japonicus]	41.4454	35.4856	34.9957	44.0921	40.4145	39.2518	33.5966	40.6115	28.489	54.9999	57.0024	53.9038	51.909	46.4664	77.0851	24.0217	24.904	20.2411	29.6387	51.6845	99.1812
XLOC_058829	Heat shock cognate 70 kDa protein 1 [Aegilops tauschii]	249.738	218.075	189.539	303.341	243.605	194.376	75.7189	121.923	15.3079	356.447	358.899	306.802	74.0864	83.596	133.667	32.7685	70.6375	45.9057	116.458	119.926	148.104
XLOC_009617	Protein kinase APK1B, chloroplast precursor, putative [Ricinus communis] >gi|223533433|gb|EEF35181.1| Protein kinase APK1B, chloroplast precursor, putative [Ricinus communis]	3.05544	4.40042	5.76154	3.4876	2.49461	3.75709	29.8946	15.9573	1.13331	7.38964	10.9966	10.0482	4.97622	3.09367	2.4235	28.9434	8.7343	26.5622	148.811	11.401	10.7567
XLOC_067339	structural constituent of ribosome, putative [Ricinus communis] >gi|223541842|gb|EEF43388.1| structural constituent of ribosome, putative [Ricinus communis]	22.784	28.6943	30.1791	16.7892	25.5082	28.9288	55.2489	26.1209	5.78218	5.80556	9.03379	7.82785	9.98195	54.329	127.394	77.6368	99.8263	134.643	31.3269	27.4219	32.3365
XLOC_068516	PREDICTED: uncharacterized protein LOC101261797 [Solanum lycopersicum]	35.5887	53.1948	1.64572	78.0786	56.198	2.06829	2.42099	1.86633	2.66653	4.97997	19.8898	13.5108	4.55307	11.2618	1.50788	2.14383	1.37662	1.63386	4.08768	4.56265	2.95789
XLOC_067613	hypothetical protein CARUB_v10018269mg, partial [Capsella rubella]	10.2978	7.99847	7.87632	7.21109	8.60063	7.75551	180.986	437.261	0	3.7414	0.50744	6.12972	0	8.7375	0	0	0	0	6.87994	0.171378	0.15995
XLOC_060390	allene oxide cyclase [Cymbidium ensifolium]	40.6805	42.9531	34.1531	56.5749	40.8252	61.2586	79.5082	30.2789	25.1188	29.4582	25.601	28.009	17.3851	36.2639	47.3287	131.046	75.3255	83.6503	113.089	42.8737	63.7557
XLOC_051121	hypothetical protein F775_14799 [Aegilops tauschii]	1.02612	0.251981	0.834364	0.996693	0.410407	0.539395	1.91615	2.03661	2.32254	1.98803	1.62293	1.17768	1.64566	2.70185	4.65359	0	1.46506	0	3.36466	2.60087	1.39841
XLOC_061435	predicted protein [Populus trichocarpa] >gi|222836466|gb|EEE74873.1| predicted protein [Populus trichocarpa]	0.668944	0.358389	0.136115	0.328124	0.100616	0.754207	0.150414	1.81837	0	0.071494	0.0729951	0.568921	0.191909	0.300009	0.251931	0	0	0	0.0832417	0	0.105038
XLOC_040289	Os03g0137500 [Oryza sativa Japonica Group] >gi|122247550|sp|Q10S27.1|VDAC6_ORYSJ RecName: Full=Mitochondrial outer membrane protein porin 6; AltName: Full=Voltage-dependent anion-selective channel protein 6; Short=OsVDAC6 >gi|108706073|gb|ABF93868.1| Eukaryotic porin family protein, expressed [Oryza...	61.1634	74.71	63.6062	79.1596	78.2726	63.3823	161.207	147.778	91.4943	103.383	82.897	81.6027	86.4775	188.359	151.642	88.8902	104.865	77.3782	83.8985	221.005	147.529
XLOC_080151	o-linked n-acetylglucosamine transferase, ogt, putative [Ricinus communis] >gi|223531728|gb|EEF33550.1| o-linked n-acetylglucosamine transferase, ogt, putative [Ricinus communis]	1.80937	3.58131	2.89008	2.35072	1.34249	1.73066	0.73528	1.75314	0	0.87944	0.918924	0.112403	0.403781	0.823872	0	0	0	0	1.11805	0	0
XLOC_069260	Zinc finger protein ZPR1 [Aegilops tauschii]	0	2108.26	0	2297.25	0	0	0	0	34.8887	296.366	1702.56	248.638	1104.71	215.026	0	2062.18	1427.66	119519	940.683	249.841	349.615
XLOC_061517	unnamed protein product [Vitis vinifera]	0	0	0	0	0	0	0	0	0	0	0	0	0	1.23626	5.62056	0	0	0	0.808971	0.50997	2.0702
XLOC_032827	PREDICTED: protoporphyrinogen oxidase, chloroplastic-like [Setaria italica]	3.91554	5.03492	5.28152	3.44743	2.52001	3.80203	16.2587	6.90998	1.17922	0.420137	0.343085	0.827043	0.450579	1.77396	1.66952	1.92809	0	1.45034	0.0844014	0.187491	0.346429
XLOC_075515	Late embryogenesis abundant (LEA) hydroxyproline-rich glycoprotein family, putative [Theobroma cacao]	2.03417	1.74231	8.25878	0.455976	3.31958	2.01711	11.4767	16.8127	0	1.23062	0	0	0	26.4841	1.53279	3.30335	0	4.88286	9.77556	30.9276	39.7106
XLOC_024870	Zinc ion binding isoform 1 [Theobroma cacao]	21.9985	18.8875	19.4496	23.0381	22.4146	21.946	5.80543	13.1905	5.3571	16.9492	12.5051	20.0494	14.9242	18.6112	5.86895	0	2.26151	14.6083	10.0543	2.72079	4.54073
XLOC_032977	Aldehyde dehydrogenase 7B4 isoform 4 [Theobroma cacao]	60.0699	48.5792	38.4587	54.3875	49.3778	39.8172	95.6031	82.118	15.328	34.7052	42.9622	45.8759	37.5007	60.3402	54.2173	0	0	0.689343	21.3212	79.2028	81.9984
XLOC_026897	Os01g0907400 [Oryza sativa Japonica Group] >gi|56785106|dbj|BAD82744.1| putative floral activator, relative of early flowering 6 [Oryza sativa Japonica Group] >gi|113534668|dbj|BAF07051.1| Os01g0907400 [Oryza sativa Japonica Group] >gi|222619720|gb|EEE55852.1| hypothetical protein OsJ_04472 [Oryza s...	3.82732	2.64601	2.71855	5.03354	3.18846	2.82952	4.86637	2.8705	0.064631	0.0297628	0.059625	0.0141113	0.0257495	0	0.0317829	0	0	0	1.58176	0	0
XLOC_067499	hypothetical protein RCOM_1595950 [Ricinus communis] >gi|223551155|gb|EEF52641.1| hypothetical protein RCOM_1595950 [Ricinus communis]	1.14849	1.3407	0.748806	1.69519	2.60921	0.526574	0	0	0	0.0750899	0	0	0.373123	0	0	0	0.783216	0	0.367688	3.46908	3.32779
XLOC_000485	hypothetical protein PRUPE_ppa020895mg [Prunus persica]	6.11039	7.08852	9.1355	5.64249	6.71316	6.71653	24.042	14.8019	7.76271	2.07695	2.9442	2.82761	3.892	10.4887	16.1	15.276	17.5152	7.13699	8.81492	2.14818	2.63327
XLOC_086606	transport protein sec61 subunit gamma-1 [Arabidopsis thaliana] >gi|18423153|ref|NP_568728.1| protein transport protein sec61 subunit gamma-1 [Arabidopsis thaliana] >gi|297795847|ref|XP_002865808.1| hypothetical protein ARALYDRAFT_495113 [Arabidopsis lyrata subsp. lyrata] >gi|297799504|ref|XP_0028676...	179.309	171.597	215.85	204.222	185.002	172.888	192.723	505.825	379.348	140.385	150.936	158.6	306.615	152.529	272.766	378.26	383.911	440.523	186.35	113.476	149.988
XLOC_028394	PREDICTED: NADP-dependent alkenal double bond reductase P1-like [Solanum lycopersicum]	68.5733	76.6452	66.9632	78.0091	67.826	73.9013	59.2146	53.0753	120.827	145.418	124.216	125.161	121.042	199.389	84.9536	82.0566	57.5184	82.3205	40.1432	46.356	54.8287
XLOC_037385	hypothetical protein PRUPE_ppa000770mg [Prunus persica]	6.55104	5.64475	6.02965	9.4934	5.22799	5.31827	7.56371	4.45669	9.57474	12.0944	13.1898	12.5863	12.2441	12.3785	10.4948	12.9155	7.43469	10.5009	10.2962	6.53075	9.94199
XLOC_077177	hypothetical protein VITISV_033417 [Vitis vinifera]	1.11791	0.694325	1.04296	0.685469	0.6509	0.365487	0.088664	0.0465439	0	0.266758	0.160441	0.491318	0	0.404888	0.4434	0	0.42434	0	0.622088	0	0.233767
XLOC_029911	Nucleolar GTPase [Medicago truncatula] >gi|355480151|gb|AES61354.1| Nucleolar GTPase [Medicago truncatula]	3.09032	4.14086	5.35636	4.94093	4.00379	4.2263	12.3696	4.27239	0	0.15465	0.0766546	0.0725035	0.26221	0	0.150339	0	0	0	0.077971	0	0
XLOC_024260	hypothetical protein ZEAMMB73_560145, partial [Zea mays]	6.91189	9.13586	9.1294	7.1372	7.6711	7.36065	1.50611	0.683742	3.50238	4.66822	2.34894	3.02579	3.30473	2.83641	1.2642	0	0	0	0.465371	0	0.401529
XLOC_029553	uncharacterized protein LOC100191298 [Zea mays] >gi|242081071|ref|XP_002445304.1| hypothetical protein SORBIDRAFT_07g008560 [Sorghum bicolor] >gi|194698246|gb|ACF83207.1| unknown [Zea mays] >gi|195622666|gb|ACG33163.1| ADP-ribosylation factor 3 [Zea mays] >gi|241941654|gb|EES14799.1| hypothetical pr...	20.2114	16.1677	17.2426	18.1246	20.6456	20.4981	17.1684	14.3337	13.0868	12.4193	19.9496	20.0584	12.3372	13.6319	11.2743	24.6022	21.3892	30.1666	35.1586	8.24481	10.4858
XLOC_087179	PREDICTED: transcription factor Pur-alpha 1-like [Vitis vinifera]	38.4035	38.8929	49.5931	35.4571	38.9057	40.4708	17.7661	13.1474	6.1175	14.0879	10.9184	12.1036	12.753	17.5486	19	11.9295	9.43983	9.63281	18.9169	7.40869	8.36644
XLOC_028077	Peptide transporter PTR3-A [Theobroma cacao]	1.64765	3.23033	3.8393	3.84234	2.5674	2.7609	11.2684	9.29157	0.522026	2.24359	1.36921	1.78294	0.233313	5.44007	3.69992	12.4886	14.6072	17.1329	9.69577	29.8557	32.815
XLOC_077565	Os10g0560000 [Oryza sativa Japonica Group] >gi|18873845|gb|AAL79791.1|AC079874_14 unknown protein [Oryza sativa Japonica Group] >gi|31433498|gb|AAP55003.1| expressed protein [Oryza sativa Japonica Group] >gi|113639908|dbj|BAF27213.1| Os10g0560000 [Oryza sativa Japonica Group] >gi|215694728|dbj|BAG89...	5.67298	4.47567	3.4972	6.36517	4.57637	3.8282	0.267328	0.210337	0.0510498	0.183681	0	0.052731	0.0507159	0.213216	0.269146	0.477279	0.480112	1.58385	0.985084	1.19079	1.70931
XLOC_056774	PREDICTED: O-acyltransferase WSD1 [Vitis vinifera]	9.93395	16.1633	19.1025	9.36526	6.68229	14.3774	7.25234	15.3675	0	1.38775	1.13371	1.5341	0	0	0.520168	2.2133	0	3.48257	18.3811	7.35901	7.0895
XLOC_092611	PREDICTED: uncharacterized protein LOC100257623 [Vitis vinifera]	3.79544	2.83635	2.61939	1.65562	1.81939	2.77463	4.25666	3.28045	0.103787	1.09741	0.703918	0.894462	0.808044	1.10151	0.173952	0	0	0	0	1.64732	0.178674
XLOC_035927	hypothetical protein PRUPE_ppa006113mg [Prunus persica]	15.4301	16.2557	15.4903	20.6721	18.1615	17.6805	11.0639	13.253	24.5445	30.2191	29.8862	34.7671	29.9083	22.0199	28.5681	15.052	20.0148	15.0101	14.4841	12.3401	17.5253
XLOC_033687	PREDICTED: putative Holliday junction resolvase [Vitis vinifera]	43.0063	92.2071	91.1078	86.4009	89.5391	53.3399	1.61043	22.4026	1.12577	216.64	323.036	185.434	186.624	107.914	113.937	110.507	274.712	1363.45	12.0723	82.6169	102.633
XLOC_055372	hypothetical protein PRUPE_ppa007304mg [Prunus persica]	3.34915	3.07775	3.6554	3.56915	3.17737	2.06884	10.3785	7.42093	0.216851	1.14541	2.05564	3.30961	3.44524	15.3438	130.877	10.3341	6.88938	7.92412	17.1769	10.3233	12.1645
XLOC_019958	PREDICTED: non-structural maintenance of chromosome element 4 [Vitis vinifera]	0.472265	0.533217	0.608099	1.26922	0.29613	0.369355	2.863	1.98539	0	0.629647	0.424534	0.302276	2.01004	0.766416	0.987396	0	0	0	0.421043	0.507342	0.455996
XLOC_017872	hypothetical protein (mitochondrion) [Vicia faba]	0.785274	0.216607	0	0.952304	0	0.151147	0	0.59938	3.18716	0.404247	0.69997	0.944701	1.20119	1.90695	0.227358	0	0	1.12677	7.31398	2.85772	3.45891
XLOC_064639	telomerase reverse transcriptase [Phragmipedium longifolium]	0.858938	0.541919	0.805163	0.782326	0.837408	0.760612	0.318688	0.291295	0	0.287551	0.345471	0.606806	0.40074	0	0	0	0	0	0.166819	0	0.166
XLOC_093238	polyubiquitin [Volvox carteri f. nagariensis] >gi|300261239|gb|EFJ45453.1| polyubiquitin [Volvox carteri f. nagariensis]	8.00255	10.1231	9.0828	9.0909	13.0279	10.4549	11.3551	8.8783	41.8196	41.4082	45.9518	38.6742	40.7209	25.4092	44.7427	4.36944	7.61037	8.86935	14.9264	1.39821	3.20462
XLOC_009124	PREDICTED: V-type proton ATPase 21 kDa proteolipid subunit-like [Cucumis sativus] >gi|449499588|ref|XP_004160858.1| PREDICTED: V-type proton ATPase 21 kDa proteolipid subunit-like [Cucumis sativus]	24.9181	31.7946	36.4232	20.0555	29.1354	32.5176	97.9588	55.4484	24.9154	43.015	47.6751	47.4359	49.062	77.633	119.42	50.2455	45.4955	54.71	57.8166	40.2282	48.6454
XLOC_038864	AtMYB45 [Arabidopsis lyrata subsp. lyrata] >gi|297321771|gb|EFH52192.1| AtMYB45 [Arabidopsis lyrata subsp. lyrata]	0	0.0818031	0	0	0.0355698	0.0572692	1.21159	17.6065	2.29505	0.126184	0	0.138676	0.057797	0	0	0	0	0	5.68368	11.7353	14.66
XLOC_033080	PREDICTED: uncharacterized protein LOC100241254 [Vitis vinifera]	2.00932	2.16785	1.38541	1.50448	1.90226	1.66078	1.77472	0.59034	0	0.339858	0.246685	0.298228	0.0570779	0.0672092	0	0	0	0	0.0747582	0	0
XLOC_035701	PREDICTED: caffeic acid 3-O-methyltransferase 1-like isoform X2 [Cicer arietinum]	14.5401	14.1242	27.6671	12.1702	14.5923	14.5517	15.0157	7.83531	3.61868	20.2397	20.7563	20.3452	26.8922	28.9098	35.1141	15.9023	19.3128	12.7669	16.0087	10.7052	19.8968
XLOC_009810	hypothetical protein ZEAMMB73_676690 [Zea mays]	6.76849	6.1213	3.97052	12.5548	8.75807	6.05326	0	0	0	0	0	0	0	0	0	0	0	0	0	0	0
XLOC_091010	unnamed protein product [Vitis vinifera]	20.4578	16.4356	23.2917	21.3274	18.252	14.7303	17.1079	2.76839	0.085985	0.890659	1.03055	0.741113	0.848371	12.9047	13.4682	20.4549	24.276	25.7105	3.59766	4.6555	7.91858
XLOC_060350	class III peroxidase [Gossypium hirsutum]	0	0	0	0	0	0	0.905739	4.06939	2.95536	12.7983	9.36272	9.83523	10.5422	0.320494	1.00069	5.71213	7.24332	5.56904	0	0	0.341136
XLOC_044165	predicted protein [Populus trichocarpa] >gi|222858592|gb|EEE96139.1| predicted protein [Populus trichocarpa]	49.348	59.1878	40.985	45.3533	54.1302	46.2714	40.0796	20.6546	55.0038	50.0017	63.4758	63.4363	63.4896	66.6314	50.7493	2.58728	5.18172	1.97844	4.23937	4.24093	6.18997
XLOC_070143	unknown [Zea mays] >gi|413938264|gb|AFW72815.1| putative RING zinc finger domain superfamily protein [Zea mays]	2.8576	3.60031	1.79523	1.92565	3.14244	1.64028	2.52674	2.10902	0	0	0	0	0	0	0	0	0	0	0	0	0
XLOC_089452	phosphate translocator-like protein [Oryza sativa]	1773.81	0	3198.63	3777.01	2807.87	9319.76	14708.4	6343.77	0	763.296	718.592	634.31	142.637	561.874	0	1234.17	4936.7	59220.2	1131.13	354.825	198.853
XLOC_077917	replication initiation protein [Escherichia coli K-12] >gi|58383238|ref|YP_194808.1| replication protein [Salmonella enterica subsp. enterica serovar Typhimurium] >gi|149930782|ref|YP_001294713.1| replication protein [Escherichia coli] >gi|187736745|ref|YP_001816483.1| replication protein [Escherich...	0	0	0	0	0	0	0	0	0	0	0	0	0	0	0	0	0	0	11.3807	0.0338686	0.0319375
XLOC_017586	unnamed protein product [Vitis vinifera]	0	0	0	0	0	0	4.20594	1.43349	1.49964	6.81379	3.67322	5.48861	5.87813	8.93751	11.0706	83.6243	53.2463	70.0203	2.2195	4.81171	4.83062
XLOC_086809	Os09g0500600 [Oryza sativa Japonica Group] >gi|113631811|dbj|BAF25492.1| Os09g0500600 [Oryza sativa Japonica Group] >gi|215695029|dbj|BAG90220.1| unnamed protein product [Oryza sativa Japonica Group]	7.23222	5.97203	5.69171	8.33085	6.17469	5.66435	3.57538	2.94875	13.6301	10.4289	10.7536	10.1134	9.97166	11.4091	9.9149	1.66445	1.39865	2.91904	2.82128	4.89958	7.51741
XLOC_080759	hypothetical protein OsJ_08815 [Oryza sativa Japonica Group]	4.0471	3.73062	4.73782	4.52716	3.96075	4.34692	9.13971	11.3944	0	0.016214	0.0162896	0	0	0	0	0	0	0	0	0	0
XLOC_024438	hypothetical protein M569_06059 [Genlisea aurea]	0	0	0	0	0	0	41.0062	80.7691	0	0	0	0	0	3.50071	0	0	0	0	0	0	0
XLOC_023605	PREDICTED: subtilisin-like protease [Vitis vinifera]	27.4135	25.0297	29.831	39.1637	31.4834	26.3557	2.13906	19.5268	2.30937	2.135	1.23611	1.05345	0.554002	0.0982465	3.51361	14.2236	11.5137	16.3205	24.2714	21.3555	23.4972
XLOC_006881	PREDICTED: uncharacterized protein LOC101779064 [Setaria italica]	0	0	0	0	0	0	0.61324	0	0	0.527195	0	0.647169	0	0	0	2.85307	0	2.12706	0	2.01306	1.75185
XLOC_068734	Pre-rRNA-processing protein TSR1 isoform 1 [Theobroma cacao]	19.1715	16.5532	12.9502	18.5592	16.2977	14.6097	11.8372	11.0689	10.7069	17.621	18.7631	19.2272	16.5664	6.98849	3.08411	0.683787	0.706411	0.513584	3.7246	3.78936	6.64304
XLOC_035265	group 5 late embryogenesis abundant protein [Citrus unshiu] >gi|90404835|gb|ABD93883.1| group 5 late embryogenesis abundant protein [Citrus unshiu]	2.13009	7.10455	18.0223	2.40375	2.78276	6.86454	8.11889	87.6634	1.91442	0.553646	0.855279	0.547796	0.904666	14.6551	3.45958	1.07757	2.15515	3.29343	17.4826	55.2526	34.4192
XLOC_015279	predicted protein [Populus trichocarpa] >gi|222857097|gb|EEE94644.1| predicted protein [Populus trichocarpa]	14.0183	11.5097	17.4777	14.4217	11.7928	12.669	22.0905	10.7936	17.566	22.4234	32.6974	29.6201	30.1618	14.0706	7.9235	0	0	2.121	9.74044	0	0.535714
XLOC_023812	PREDICTED: CCR4-NOT transcription complex subunit 1-like [Vitis vinifera]	14.559	11.6025	13.2412	21.1294	14.0248	14.9155	24.5201	12.1095	2.58774	9.37248	9.53482	5.90067	8.9069	9.03743	10.5301	0	1.04247	0.402508	5.50009	6.0374	14.9713
XLOC_027767	PREDICTED: uncharacterized protein LOC100839140 [Brachypodium distachyon]	1.69549	1.58037	1.68037	2.59298	1.92595	1.85457	0.920445	0.955584	1.18608	2.58137	2.17493	2.28573	2.41835	0.456485	0.245536	0.174993	0.343983	0.261516	1.07872	0.871602	1.0393
XLOC_050937	RecName: Full=CASP-like protein MA4_106O17.50 >gi|102139805|gb|ABF69990.1| hypothetical protein MA4_106O17.50 [Musa acuminata]	0	0	0	0.325173	0	0.299307	4.90724	2.4069	0	0	0	0	0	0	0	0	0	0	0	0	0
XLOC_017475	hypothetical protein OsI_23949 [Oryza sativa Indica Group]	0	0	0.106961	0	0	0.0655258	0.123463	0.886898	0	0	0.0575209	0.11021	0	0.239765	0.211321	0	0	0	0	0	0
XLOC_076182	conserved hypothetical protein [Ricinus communis] >gi|223546707|gb|EEF48205.1| conserved hypothetical protein [Ricinus communis]	39.105	37.5141	41.2174	45.4248	39.2427	40.9279	45.3266	55.4572	76.2022	97.2886	101.963	110.687	99.3392	80.2336	87.1689	68.3523	68.2806	63.9396	93.2436	411.846	76.0818
XLOC_026024	conserved hypothetical protein [Ricinus communis] >gi|223550322|gb|EEF51809.1| conserved hypothetical protein [Ricinus communis]	15.799	16.4301	14.595	16.8052	17.1417	18.5174	10.4435	4.75916	18.1183	19.6811	21.3196	23.0677	16.4655	23.1983	11.1925	0	0	0.876162	4.45162	1.87318	7.57172
XLOC_012310	PREDICTED: alpha-1,6-mannosyl-glycoprotein 2-beta-N-acetylglucosaminyltransferase-like [Setaria italica]	1.47685	1.47859	1.68169	1.50896	1.73239	1.55273	2.82064	3.88588	0.0258425	0.218749	0.0740627	0.0943683	0.129947	0	0	0	0	0	0	0	0
XLOC_075510	PREDICTED: protein NSP-INTERACTING KINASE 1-like, partial [Cucumis sativus]	17.5247	14.1929	12.808	20.5133	16.5955	13.4737	0.324624	0.0887401	0	0	0	0	0.0625366	0	0	0	0	1.079	0	0	0
XLOC_062250	PREDICTED: uncharacterized protein C57A10.07 [Vitis vinifera] >gi|302142776|emb|CBI19979.3| unnamed protein product [Vitis vinifera]	28.0809	39.5225	37.4003	33.1548	33.3678	43.6979	34.9383	37.4769	58.4737	58.5369	58.9312	70.2778	78.2624	97.3516	60.064	3.43239	7.44973	7.91872	15.9934	21.6334	24.8412
XLOC_087787	hypothetical protein VITISV_003756 [Vitis vinifera]	6.77642	7.98906	16.3999	7.0409	6.20945	8.48204	8.80223	3.6144	0.172742	0.650753	0.105292	0.460703	0.274133	8.81619	7.43945	1.05546	3.67413	2.33221	5.65226	4.09025	6.77538
XLOC_025559	PREDICTED: protein Red isoform 3 [Vitis vinifera]	14.6053	11.7345	10.1814	16.5675	11.4674	11.2737	12.8839	5.38181	8.13268	12.2019	12.8958	12.832	10.3131	16.3831	6.98899	0	1.44134	1.10448	7.18158	8.8901	12.738
XLOC_048936	Calcium-binding EF-hand family protein [Theobroma cacao]	7.12312	6.66282	5.98026	3.55348	6.05683	7.85447	7.46022	4.03928	13.8108	9.15759	8.78481	8.02613	9.2242	75.7753	104.546	90.6656	111.255	112.256	54.497	9.60762	17.2996
XLOC_091798	unnamed protein product [Vitis vinifera]	3.8308	4.21338	2.92292	4.54458	4.66664	4.42887	6.57426	5.00721	7.28978	7.94273	7.57298	6.08428	8.95057	8.5106	4.31457	0	0	0.709953	2.90315	1.08267	0.86689
XLOC_091728	PREDICTED: la-related protein 6-like [Vitis vinifera] >gi|297740679|emb|CBI30861.3| unnamed protein product [Vitis vinifera]	23.7833	21.617	7.93262	23.0969	23.7745	8.39688	7.54116	11.2872	19.8093	21.8652	21.2844	17.3985	21.5493	74.053	31.8744	38.0832	27.1186	21.3735	6.86152	7.55485	17.9532
XLOC_013186	PREDICTED: Golgi to ER traffic protein 4 homolog [Glycine max]	10.8147	7.55619	5.14732	5.76346	7.822	6.21691	5.31801	6.15537	4.41474	5.3627	4.87563	4.82554	5.09503	2.60617	8.61465	1.25146	1.21927	0	1.31731	1.30857	1.45591
XLOC_067059	hypothetical protein PRUPE_ppa009210mg [Prunus persica]	13.6319	4.15077	12.759	5.08757	5.03729	8.31733	0.774409	2.25045	5.16209	4.78177	3.908	1.22603	2.18677	0	0.845283	5.64581	10.9768	19.523	3.80865	4.86786	0.191787
XLOC_036141	PREDICTED: casein kinase I isoform delta-like isoform 1 [Solanum lycopersicum]	15.6838	16.1157	14.2265	21.1292	19.4252	20.632	11.7115	11.3071	0.126743	0	0	0	0.224517	0	0	0	0	0	0	0	0
XLOC_020499	putative protein phosphatase 2C 45 [Triticum urartu]	4.00783	9.45833	5.89503	7.09191	4.71326	8.20568	6.33076	8.22952	12.6296	18.3591	22.4366	17.8479	19.265	6.38447	6.97133	0	0.727774	0	1.93868	2.8506	3.35534
XLOC_066729	hypothetical protein VITISV_008336 [Vitis vinifera]	24.6204	23.2926	24.1884	20.4926	25.5309	23.5544	37.3882	34.2655	36.8138	39.6157	48.264	51.7881	47.378	32.1114	57.3116	10.3729	9.82352	6.30171	17.5685	9.85629	7.81646
XLOC_033734	Uncharacterized protein isoform 1 [Theobroma cacao] >gi|508718986|gb|EOY10883.1| Uncharacterized protein isoform 1 [Theobroma cacao] >gi|508718989|gb|EOY10886.1| Uncharacterized protein isoform 1 [Theobroma cacao] >gi|508718990|gb|EOY10887.1| Uncharacterized protein isoform 1 [Theobroma cacao] >gi|5...	3.97461	3.61216	7.49546	4.73261	4.60678	3.13464	10.1564	7.06181	7.33528	15.1359	15.6985	14.3307	17.3096	15.3342	15.1048	19.6314	18.0587	20.7105	3.49719	10.8926	11.4901
XLOC_044586	hypothetical protein PRUPE_ppa000201mg [Prunus persica]	3.75577	3.73022	3.05256	0	4.02009	3.43534	8.90752	1.31351	0	0	0	0	0	0	0	0	0	0	3.26454	0	0
XLOC_008338	hypothetical protein ARALYDRAFT_901281 [Arabidopsis lyrata subsp. lyrata] >gi|297326566|gb|EFH56986.1| hypothetical protein ARALYDRAFT_901281 [Arabidopsis lyrata subsp. lyrata]	3.77423	5.6681	7.88085	2.61964	6.73285	7.42451	4.10601	3.6427	7.4133	4.51302	5.0445	5.11668	7.28245	12.6636	7.73547	0	0	0	3.11267	1.5976	1.67652
XLOC_049351	predicted protein [Populus trichocarpa] >gi|222858781|gb|EEE96328.1| predicted protein [Populus trichocarpa]	1.59438	2.07092	1.67103	1.49137	2.74464	1.79186	1.61151	1.65585	0.786297	1.68432	2.9059	1.58256	2.84472	3.04414	4.25973	0	0	0	4.35812	2.13858	3.32894
XLOC_041309	RecName: Full=Anthocyanidin 3-O-glucosyltransferase 7; AltName: Full=Flavonol 3-O-glucosyltransferase 7; AltName: Full=UDP-glucose flavonoid 3-O-glucosyltransferase 7 >gi|453253|emb|CAA54614.1| UTP-glucose glucosyltransferase [Manihot esculenta]	0.142074	0	0	0.0895373	0	0.200807	0.511382	0.902419	0.273682	0.65056	0.432419	0.0465328	0.0554487	1.46624	0.0570161	0	5.05901	0	2.66101	0	0.0637119
XLOC_004463	PREDICTED: heat shock 70 kDa protein, mitochondrial-like [Cucumis sativus] >gi|449511372|ref|XP_004163938.1| PREDICTED: heat shock 70 kDa protein, mitochondrial-like [Cucumis sativus]	13.9433	13.2049	8.6199	17.6436	14.6364	11.4529	10.6371	21.0646	29.3177	45.7477	48.2987	52.2228	34.4981	56.824	48.1851	71.1894	83.2553	100.477	24.0041	52.2755	70.8447
XLOC_045484	PREDICTED: ER membrane protein complex subunit 4-like [Solanum lycopersicum]	0	0	0	0.33764	0	0	44.0094	68.289	89.7482	21.3063	16.1109	9.22673	15.851	429.643	140.728	23.385	10.2213	17.4709	60.2967	63.3142	40.213
XLOC_027858	hypothetical protein SORBIDRAFT_01g043170 [Sorghum bicolor] >gi|241919509|gb|EER92653.1| hypothetical protein SORBIDRAFT_01g043170 [Sorghum bicolor]	5.17668	5.98223	13.1801	6.7122	0	10.3131	0	0	1.11134	22.2296	29.7458	45.8745	20.082	2.8401	5.41837	0	0	0	0.750634	6.13721	8.33528
XLOC_082436	predicted protein [Populus trichocarpa] >gi|222849440|gb|EEE86987.1| predicted protein [Populus trichocarpa]	3.06792	2.87199	4.14962	4.58937	4.46125	4.1552	10.9767	4.72874	5.95949	17.8455	18.4581	13.5222	20.2809	63.4224	64.5763	5.37459	10.2458	14.6855	4.0536	6.12044	10.9647
XLOC_049757	PREDICTED: E3 ubiquitin-protein ligase At3g02290-like [Brachypodium distachyon]	7.44322	9.74797	11.3885	6.87523	10.4354	8.99925	15.7971	16.0071	26.9809	17.8309	19.3393	21.3595	23.2428	4.56318	5.34013	0	0	0	5.20448	0.164776	0.431764
XLOC_064943	putative ulp1 protease family protein [Zea mays]	8.15127	8.07228	6.05475	9.18025	8.21589	8.13965	8.09823	5.33504	6.24534	8.59363	9.1388	9.00528	7.49376	14.3133	10.813	2.54148	2.53926	3.28306	6.6782	8.21343	8.20321
XLOC_033851	hypothetical protein SORBIDRAFT_02g024370 [Sorghum bicolor] >gi|241923570|gb|EER96714.1| hypothetical protein SORBIDRAFT_02g024370 [Sorghum bicolor]	5.78524	8.60088	8.79625	8.3502	11.8817	8.22738	4.48102	8.41061	16.6107	20.6294	25.3762	30.6635	76.1117	2.87429	7.47162	20.6147	25.6511	18.1895	11.1548	1.83379	3.32766
XLOC_092050	PREDICTED: uncharacterized protein LOC101782167 [Setaria italica]	10.082	8.49077	4.94753	11.3663	8.67846	7.52918	0.338496	3.82308	6.3839	4.55607	2.20256	1.99427	3.40625	0	0.297597	10.7334	14.1486	18.8205	8.90156	4.90933	9.14081
XLOC_005570	PREDICTED: cell division cycle protein 48 homolog [Vitis vinifera] >gi|297741633|emb|CBI32765.3| unnamed protein product [Vitis vinifera]	58.758	60.4446	78.6129	77.0269	55.2279	58.8729	82.0679	46.5914	106.515	189.43	186.487	195.261	170.956	103.387	91.5031	17.4686	22.561	14.3528	67.4688	53.7182	91.1941
XLOC_066537	PREDICTED: protein SPA1-RELATED 3 [Vitis vinifera]	58.2755	61.2101	91.6404	68.7781	56.4864	54.4259	20.1754	29.1061	18.9681	17.9119	15.9728	14.6952	16.109	42.151	38.8345	6.80832	15.6494	7.87749	14.583	30.262	39.0146
XLOC_092022	hypothetical protein PRUPE_ppa000747mg [Prunus persica]	7.45082	6.81081	6.61953	5.1187	3.0977	5.33142	7.0621	2.43575	2.18571	24.3955	31.4603	36.042	35.6517	3.16527	8.45631	0	0.32737	1.43661	3.66808	0	3.0125
XLOC_087003	predicted protein [Populus trichocarpa] >gi|222861917|gb|EEE99459.1| predicted protein [Populus trichocarpa]	2.61764	1.49958	1.60007	1.29472	1.91763	0.856937	4.4918	3.12169	6.00383	15.4662	12.3175	13.5262	9.30112	6.3883	7.38452	0.834314	0.839854	1.37625	3.38214	2.94064	4.37806
XLOC_042320	PREDICTED: probable receptor protein kinase TMK1 [Vitis vinifera]	10.2389	8.51918	6.10067	9.36346	8.11414	7.52437	1.04009	5.71443	14.0099	8.7765	9.08504	10.017	7.69389	0.439553	0.93421	0.870208	0.646382	0.59845	4.19101	3.0477	2.86197
XLOC_028931	early flowering protein 1 [Asparagus officinalis]	0.635396	3.797	4.75114	0.708884	1.53554	6.20435	953.84	2775.03	202.324	170.297	244.765	197.681	248.423	535.421	44.2715	5.19568	3.90256	3.0304	1.96869	0.504904	0.682459
XLOC_086982	Uncharacterized protein TCM_036379 [Theobroma cacao]	2.59074	1.73175	5.66102	2.48915	3.31891	4.23678	5.59657	4.9802	1.20608	2.39743	1.15326	1.03269	0.600934	5.42265	2.87727	0	0	0	5.66583	5.17959	9.02614
XLOC_007526	unnamed protein product [Vitis vinifera]	7.96439	24.9809	6.31009	15.9663	17.3304	13.9031	90.1753	20.7028	2.94421	20.3865	31.4235	12.7299	22.9004	30.1452	13.2219	13.4282	13.4282	10.2862	3.83119	0	0.238789
XLOC_084983	TPA: putative MATE efflux family protein [Zea mays]	65.3246	79.3923	84.6297	75.4557	61.5481	85.4106	3.47952	20.7536	4.7235	2.07158	1.46366	1.61958	0.425459	0.125578	0.973256	4.18751	4.00739	8.47642	34.0613	37.4895	33.8428
XLOC_016359	putative actin depolymerizing factor protein, partial [Elaeis guineensis]	3.21881	3.36712	2.59066	2.05541	4.29569	8.4699	116.221	88.188	248.268	292.098	468.343	441.524	467.995	262.943	194.547	0	0	580.356	178.279	0	126.495
XLOC_091660	TPA: glutathione S-transferase domain containing protein [Zea mays]	17.8429	19.0782	16.9102	15.3086	14.1393	23.1009	0	0	22.459	44.926	54.1895	48.8644	30.4973	6.31959	0.36673	0	0	0	9.87126	0	0
XLOC_068114	PREDICTED: uncharacterized protein LOC101755969 [Setaria italica]	4.97343	9.5856	9.06354	5.10198	7.71118	15.2375	1.73962	10.7734	0.140111	0.544313	3.07913	2.51928	0.397309	1.65725	16.5523	16.7967	40.4842	20.2607	180.77	18.2551	26.1479
XLOC_045990	hypothetical protein PRUPE_ppa002652mg [Prunus persica]	67.5558	86.2369	79.6538	89.2043	62.0291	63.279	84.125	27.0533	97.1878	55.0326	76.3436	92.1002	90.9203	96.0329	86.7369	43.0638	85.0179	47.4709	34.1758	99.9169	66.3525
XLOC_020176	putative protein [Nicotiana sylvestris]	6.28078	4.30364	3.10172	4.22448	4.15828	3.77932	12.5474	7.80712	9.76153	9.42547	4.94832	8.72926	7.31293	11.1871	8.27399	4.98276	0	0	5.36535	13.2721	20.3294
XLOC_046185	PREDICTED: putative acyl-CoA synthetase YngI-like [Vitis vinifera]	2.22256	1.35861	1.56869	2.20462	1.25661	1.52732	35.4652	24.361	11.2475	14.6196	22.2308	21.4001	15.2124	51.3566	32.5191	49.2676	57.2534	61.3992	15.9763	18.7413	25.7915
XLOC_048032	PREDICTED: putative pentatricopeptide repeat-containing protein At3g47840-like [Solanum lycopersicum]	0.416606	0.643801	0.714111	0.652763	0.377399	0.777183	0.211768	0.330922	0.961197	1.62561	0.689723	0.714857	0.578702	1.49823	2.28597	1.99913	0.452155	1.75699	1.67811	1.48318	1.22812
XLOC_040711	hypothetical protein OsJ_13205 [Oryza sativa Japonica Group]	0	0	0.0427688	0.510457	0.18073	0.0594678	0.836201	0.0574185	0	0.317028	0.794066	0.480755	0.664871	0.824333	0.464259	0	0	0.385615	8.81602	0	0.60156
XLOC_087640	WRKY DNA-binding protein 70, putative isoform 1 [Theobroma cacao]	1.10482	2.55245	3.14803	0.915723	1.21853	4.77328	4.09963	1.79252	0	0	0.0248999	0.0256271	0	0.751163	0.255377	1.37956	5.96879	0	2.71207	0.160962	0.14408
XLOC_071952	unknown [Lotus japonicus]	0.11497	0.0725116	0.373913	0	0.102986	0.0507853	0.523839	0.478283	2.17038	0.489192	1.71583	2.1264	2.46895	0.131506	0.183731	0.213654	0	0	1.20054	4.54e-05	0.518984
XLOC_014890	hypothetical protein PRUPE_ppa003330mg [Prunus persica]	1.08655	0.95921	0.498611	0.941242	0.962815	0.735359	3.07712	3.82906	0	0	0	0	0	0	0	0	0	0	0	0	0
XLOC_054756	putative galacturonosyltransferase 13 [Triticum urartu]	6.50981	5.73285	8.83472	8.17882	6.94569	7.09858	14.7761	37.4295	14.9839	4.86738	5.63843	7.74757	6.34148	2.96721	7.75118	0.113388	0	2.04509	5.1155	4.66521	0.303396
XLOC_058768	S-locus-specific glycoprotein S13 precursor, putative [Ricinus communis] >gi|223542443|gb|EEF43985.1| S-locus-specific glycoprotein S13 precursor, putative [Ricinus communis]	2.62042	2.80848	2.13916	3.35029	2.53293	2.03662	2.7507	1.73446	0.191601	1.87952	1.41092	0.983522	0.670003	5.87174	11.5415	0	0.763589	1.17291	4.91626	3.40751	6.08122
XLOC_030119	unnamed protein product [Vitis vinifera]	0	0	0	0	0	0.0748545	0.850127	1.3177	0	0	0	0	0	0	0	0	0	0	0	0.617688	0.668731
XLOC_062287	predicted protein [Populus trichocarpa] >gi|222850402|gb|EEE87949.1| predicted protein [Populus trichocarpa]	4.22943	3.5456	4.0686	3.22268	4.80961	3.97985	7.73207	2.72162	0	0.0540847	0.376125	0.505228	0	0.488633	0	0	0	0	0.0631427	0	0
XLOC_035021	AT4G13940 [Arabidopsis thaliana]	21.3464	16.6063	17.6522	32.2467	14.5878	20.8662	82.4435	80.3509	74.2777	148.704	155.951	121.319	106.62	79.0451	94.7497	44.5708	31.6489	42.8697	193.299	101.577	76.0438
XLOC_033218	SKIP interacting protein 16 [Oryza sativa]	0.52104	0	0	0	0	0.740704	0	0	0	0	0	2.35731	0	0	0	0	0	0	6.81031	0	0
XLOC_047556	PREDICTED: transcription initiation factor TFIID subunit 5-like [Setaria italica]	21.3521	24.5773	22.9166	19.8967	16.5598	28.6528	16.1333	12.3375	39.7391	60.2335	38.756	30.0198	37.14	28.8658	14.7684	4.27095	0	1.38797	7.70382	20.0979	13.859
XLOC_023390	hypothetical protein F775_03418 [Aegilops tauschii]	3.82943	4.1622	3.91643	4.44093	2.78558	2.55305	8.63006	3.62751	0	0	0	0	0.185621	0.143064	0.186231	0	0	0	1.13476	0	0
XLOC_057553	uncharacterized protein LOC100816984 [Glycine max] >gi|255637298|gb|ACU18979.1| unknown [Glycine max]	82.3006	98.91	205.595	70.7599	95.7661	178.173	67.9377	72.473	1.94786	0.894051	1.04001	0.555961	0.498068	0.949979	0	0	0	0.967437	0.125398	0.222273	0.101163
XLOC_048814	hypothetical protein [Zea mays] >gi|223949597|gb|ACN28882.1| unknown [Zea mays] >gi|413935797|gb|AFW70348.1| hypothetical protein ZEAMMB73_074314 [Zea mays]	46.4191	53.3209	45.7443	49.8899	47.2139	51.1367	15.9485	15.3223	29.243	42.9833	50.1897	51.8772	46.4253	32.961	26.6259	14.1066	4.38845	8.4566	8.8857	14.0304	9.90641
XLOC_044466	COBRA-like extracellular glycosyl-phosphatidyl inositol-anchored protein family [Theobroma cacao]	2.08818	1.41397	1.08516	0.645562	2.54105	1.75071	0	0.199802	0.490937	7.60995	3.52151	12.2465	13.9771	1.60242	2.17303	0	0	0	3.64041	1.05176	0.778169
XLOC_044047	Os01g0349400 [Oryza sativa Japonica Group] >gi|113532509|dbj|BAF04892.1| Os01g0349400 [Oryza sativa Japonica Group] >gi|215694295|dbj|BAG89288.1| unnamed protein product [Oryza sativa Japonica Group] >gi|215712361|dbj|BAG94488.1| unnamed protein product [Oryza sativa Japonica Group] >gi|215740424|db...	2.24113	2.57332	1.86644	2.09027	1.78935	2.69954	17.4761	14.2809	7.45795	4.2511	3.34478	5.33519	3.95904	6.98383	5.98503	7.68018	3.08602	6.24386	3.14978	6.80206	10.6049
XLOC_040638	Ferric reduction oxidase 2, putative [Theobroma cacao]	0.248444	0.699218	0.578498	0.583641	0.735288	0.865347	3.38433	3.09547	0	1.07787	0.763399	1.27699	0.976542	7.08118	15.1347	1.79177	0	0	6.59333	6.54978	8.84418
XLOC_012469	predicted protein [Populus trichocarpa] >gi|222852038|gb|EEE89585.1| predicted protein [Populus trichocarpa]	29.3861	27.9711	28.2641	29.6662	30.3393	27.4706	26.1842	29.7072	22.8778	66.167	49.6359	49.8644	61.4032	57.4542	55.5724	45.8127	24.4676	40.9155	50.5783	29.2371	27.6438
XLOC_076476	PREDICTED: uncharacterized protein LOC100825324 [Brachypodium distachyon]	2.70397	3.78183	3.07752	2.51197	3.17073	2.57487	1.71472	2.74052	14.4848	9.726	5.79129	5.66948	6.98372	9.5042	10.0659	2.8115	0.0183309	7.43582	5.90386	9.10155	9.42633
XLOC_038893	hypothetical protein PRUPE_ppa005222mg [Prunus persica]	22.5708	23.6687	25.7812	25.6066	25.4533	24.0232	14.9757	13.031	26.8329	25.0099	23.0085	30.4355	25.5811	29.4079	31.5704	12.9258	9.72685	8.44523	17.5901	10.3881	19.1169
XLOC_006242	hypothetical protein OsI_33882 [Oryza sativa Indica Group]	13.6991	14.2069	8.45958	13.04	12.1976	14.4269	6.14619	2.29253	0.182989	0.392171	0.204153	0.402691	0	0	0	0	0	0	0	0	0.105849
XLOC_026009	predicted protein [Populus trichocarpa] >gi|222866536|gb|EEF03667.1| predicted protein [Populus trichocarpa]	2.84515	2.09428	2.38689	3.69604	2.35884	2.3415	3.7773	1.59348	0	1.7887	1.63318	2.50006	2.14211	0.509723	1.91867	0.762219	0	0	0.947354	0.368765	0.618903
XLOC_091164	PREDICTED: uncharacterized protein LOC100262802 [Vitis vinifera]	1.86304	1.25491	1.10494	1.61786	1.9113	0.724228	4.31945	1.94493	0.825582	3.56842	4.03775	7.67453	7.25817	2.3146	2.45963	1.16004	0.381262	0.299559	1.16792	2.91875	3.50746
XLOC_031907	PREDICTED: uncharacterized protein LOC100244343 [Vitis vinifera]	4.0632	3.28039	5.52684	5.17313	3.9083	2.46137	2.78337	1.76712	1.97944	1.87802	2.04304	0.560091	1.98137	2.16544	11.055	17.1554	20.039	31.5674	9.67777	5.54056	12.4177
XLOC_031138	hypothetical protein SORBIDRAFT_04g018940 [Sorghum bicolor] >gi|241931909|gb|EES05054.1| hypothetical protein SORBIDRAFT_04g018940 [Sorghum bicolor]	1.13436	1.48943	1.03544	1.35296	0.635336	0.630876	1.79508	1.17507	0	0	0	0	0	0	0	0	0	0	0	0	0
XLOC_056915	PREDICTED: sex determination protein tasselseed-2-like [Vitis vinifera]	0.284856	0.413637	0.692566	0.61999	0.219389	0.865209	8.71486	9.25955	1.29291	3.27786	3.09017	3.37526	1.90824	1.47417	1.09497	6.17364	22.9882	16.1191	9.95751	1.78627	1.96067
XLOC_034291	PREDICTED: vacuolar amino acid transporter 1-like [Vitis vinifera]	3.1783	2.49134	2.60184	3.51322	2.57639	2.35497	2.27751	1.28536	3.25112	15.5368	19.9982	18.9949	20.38	5.70208	6.42986	1.90152	2.07198	2.00874	4.28981	4.67299	6.8429
XLOC_050706	PREDICTED: long chain acyl-CoA synthetase 4 [Vitis vinifera] >gi|297742330|emb|CBI34479.3| unnamed protein product [Vitis vinifera]	6.4398	8.61233	9.45837	6.53475	7.72169	7.32342	52.0998	37.1791	0	6.27842	4.474	6.61807	11.2228	9.78262	3.28767	2.83441	0	0	0.493378	1.31389	0
XLOC_004584	unnamed protein product [Vitis vinifera]	5.48443	5.20186	3.33388	3.2777	5.4282	4.9316	0	2.96367	14.8037	17.5793	13.4698	9.13104	11.9793	16.0824	12.6254	16.9488	8.47438	14.6927	3.84327	3.2132	2.33415
XLOC_001622	hypothetical protein CARUB_v10009385mg [Capsella rubella]	5.68973	4.13885	5.06289	5.95888	5.57025	4.08673	0	0.284393	0	1.47841	15.2328	0.390468	11.5194	17.5086	13.9813	2.52537	0	2.0825	1.48271	3.07241	6.07597
XLOC_065525	HCP-like superfamily protein with MYND-type zinc finger [Theobroma cacao]	0.499606	1.61357	0.822142	0.205347	0.149065	1.69937	0.10825	0.113366	0.839184	0.519649	0.384196	0.761838	0.233498	0	0	0	0	0	0.888598	0.158769	0.144838
XLOC_092944	PREDICTED: uncharacterized protein LOC101315413 [Fragaria vesca subsp. vesca]	6.98741	10.022	8.80727	6.1816	9.14896	8.13281	36.2487	17.0089	0.384213	7.8756	11.265	13.3105	7.36174	4.86365	0	0	0	0	5.25585	5.0612	5.38915
XLOC_019440	PREDICTED: protein disulfide isomerase-like 2-1-like [Setaria italica]	28.4147	34.526	26.355	28.7251	33.8899	38.159	48.1132	92.1002	37.5287	38.3585	44.7807	43.1625	43.0426	30.9425	42.4623	41.2135	65.8956	43.4203	40.2145	80.4498	69.7908
XLOC_019731	PREDICTED: ras-related protein RABE1c [Vitis vinifera] >gi|296086273|emb|CBI31714.3| unnamed protein product [Vitis vinifera]	84.7347	88.0221	89.1705	95.1718	110.499	97.0704	56.3245	68.1395	108.469	181.296	186.48	180.93	216.072	88.6191	110.524	180.674	168.178	154.698	89.4605	103.731	119.425
XLOC_091174	hypothetical protein [Oryza sativa Japonica Group]	2.95308	5.03896	7.32087	4.212	6.09459	4.9418	28.3004	10.1814	4.46623	9.60095	9.49398	9.50431	14.6879	23.8437	24.7525	8.65755	8.62172	10.7174	7.32852	4.76431	3.74072
XLOC_025233	sol1 protein, putative [Ricinus communis] >gi|223536439|gb|EEF38088.1| sol1 protein, putative [Ricinus communis]	0	0	0	0	0	0	0	0	1690.33	1120.98	3745.09	0	0	0	0	437.495	0	0	0	0	2194.56
XLOC_071996	hypothetical protein CARUB_v10013869mg [Capsella rubella]	9.36013	8.84553	11.7019	9.13717	8.2203	10.7295	35.9225	13.8145	0	1.75799	0.000202982	3.33194	0.929484	0	0.277868	1.66305	0	0	4.81613	0.494345	0.696448
XLOC_015458	PREDICTED: LL-diaminopimelate aminotransferase, chloroplastic [Vitis vinifera] >gi|296081525|emb|CBI20048.3| unnamed protein product [Vitis vinifera]	0.355952	0.341848	0.538207	0.0934809	0.255333	0.663472	0.70174	2.18829	3.90038	0	0.0770418	0.0486251	0	0.263074	0.0573498	0.278119	0	0.201726	0.276725	0.337693	0.329806
XLOC_009439	DNA/RNA helicase protein RAD5 [Arabidopsis thaliana] >gi|60390961|sp|Q9FNI6.1|SM3L2_ARATH RecName: Full=Putative SWI/SNF-related matrix-associated actin-dependent regulator of chromatin subfamily A member 3-like 2; Short=SMARCA3-like protein 2 >gi|10178249|dbj|BAB11681.1| DNA repair protein RAD5 pro...	5.44665	4.03113	2.58097	4.10872	4.47377	3.90627	0.308093	1.54464	1.84036	0.837705	0.725991	0.840178	0.746765	1.77785	0.234099	0	0	0	1.38816	0.267445	0.120499
XLOC_090084	protein SUR2 [Zea mays]	0	0	0.24933	0	0	0.0765317	16.1642	30.4489	0	0.155867	0.14088	0	3.27e-06	13.2763	7.86278	30.0938	22.1642	23.0005	15.9291	5.4173	8.1529
XLOC_065310	hypothetical protein F775_10013 [Aegilops tauschii]	9.18473	7.42187	5.71896	7.80187	7.79123	9.29278	3.8735	5.70982	0	0.351599	1.47719	0.175141	0.161633	0.866601	1.19351	0	1.6039	2.81706	37.1439	16.4105	18.4877
XLOC_055264	hypothetical protein PRUPE_ppa006902mg [Prunus persica]	1.6984	1.62413	1.5905	1.61695	0.716269	0.546033	1.17645	1.34949	1.98184	2.81881	4.11523	1.75029	1.89997	1.4374	4.37924	4.04388	1.46151	5.86768	5.82167	3.78208	3.44283
XLOC_023913	PREDICTED: SNAP25 homologous protein SNAP33-like [Setaria italica]	13.5114	15.787	20.0884	16.3666	13.2468	13.1657	85.7359	53.1283	6.78017	19.3769	19.494	21.824	25.9643	46.5803	50.9638	85.2276	88.565	92.5012	29.918	32.9726	57.021
XLOC_011927	unnamed protein product [Vitis vinifera]	10.9202	9.54821	10.4284	11.1184	10.7665	9.59877	3.48446	2.66645	19.976	10.9748	13.5913	13.8707	10.6117	9.00579	3.16062	0	0	0.76947	2.20499	4.84142	5.0758
XLOC_055996	MADS-box factor MADS2 [Cymbidium ensifolium]	2.83424	0.13233	0	11.2514	7.50776	12.349	0	0	0	0.252133	0.16954	0	0.0721388	0	0	0	0	0	7.42506	0	0
XLOC_038038	unknown [Lotus japonicus]	1.26964	0.0581111	2.54522	1.72916	2.52998	2.71355	2.14423	2.61409	0	0	0.686861	0.318552	0	1.04476	2.67519	5.986	0.161714	9.72107	4.38076	36.2483	6.69058
XLOC_009365	trithorax 4 [Arabidopsis thaliana]	7.39084	4.99166	6.67283	9.16622	7.33051	6.41882	6.13845	2.96898	5.13936	5.43275	6.06499	7.16311	6.68925	4.88987	7.34554	10.0685	6.91908	6.29198	5.187	5.92792	5.99665
XLOC_022413	hypothetical protein VITISV_012325 [Vitis vinifera]	39.7182	29.5708	15.2247	34.4247	33.0553	33.013	5.17785	3.79418	48.4728	81.0308	113.629	100.86	52.808	56.112	39.8061	6.23564	8.99508	2.90785	22.3319	12.4529	27.8416
XLOC_075627	unnamed protein product [Vitis vinifera]	10.7067	9.55908	13.6331	11.8326	10.2088	8.49513	9.96464	12.0175	30.9153	59.0504	84.2884	67.4416	57.6885	34.3049	14.1599	77.0313	68.1923	81.3942	12.3491	12.5563	11.7894
XLOC_035095	cytochrome P450 [Populus trichocarpa] >gi|222852963|gb|EEE90510.1| cytochrome P450 [Populus trichocarpa]	0	0.289768	0	0.215519	0	0	0	0	0	0	0	0	0	0	0	0	0	0	0	1.66598	5.40058
XLOC_025892	protein disulfide isomerase, putative [Ricinus communis] >gi|223545789|gb|EEF47293.1| protein disulfide isomerase, putative [Ricinus communis]	9.26225	10.5807	12.9513	9.8513	10.6175	7.95574	13.2541	41.9497	1.35442	4.31991	5.54049	5.1499	5.73354	16.8192	49.8614	45.5906	26.6965	32.9447	78.6499	75.2858	111.312
XLOC_038761	uncharacterized protein LOC100217313 [Zea mays] >gi|194698492|gb|ACF83330.1| unknown [Zea mays]	12.7267	11.7338	12.7542	10.2322	10.1288	10.0568	6.27443	7.44896	44.4967	12.1862	11.2254	11.1596	5.72497	15.0488	5.3948	6.41334	4.71756	4.59799	5.70065	17.2	9.19123
XLOC_073635	PREDICTED: GDT1-like protein 1, chloroplastic [Vitis vinifera]	4.1797	9.60683	9.5839	2.27368	7.40731	8.4207	14.1698	2.00065	1.17239	3.22919	7.27408	8.97463	10.8194	59.5664	112.057	41.3384	26.2098	23.096	6.20232	9.67165	14.3166
XLOC_007699	hypothetical protein OsJ_22414 [Oryza sativa Japonica Group]	0	0	0	0	0	0	0	0	7.11904	0.450527	0.497474	0.939855	0	0	0	50.4903	26.288	88.7005	0	0	0.193349
XLOC_073668	ARM repeat superfamily protein, putative [Theobroma cacao]	3.78337	4.07639	2.6771	4.12899	2.7695	3.2042	2.84655	1.61536	0	0.169265	0	0	0.293382	0	0	0	0	0	0	0	0
XLOC_018555	hypothetical protein OsI_16793 [Oryza sativa Indica Group]	0	0	0	0	0	0	0	0.672269	0	0	0	0	0	0	0	0	0	0	0	3.21375	4.78169
XLOC_050129	hypothetical protein VITISV_033076 [Vitis vinifera]	0.0805949	0.151132	0.693248	0.107077	0.253179	0.211298	0.602825	1.56043	4.65599	5.07368	4.58027	2.13178	3.70358	3.15678	1.79468	0	0	0.715423	0.610009	5.97438	8.80678
XLOC_008559	Leucine-rich repeat transmembrane protein kinase [Theobroma cacao]	11.5132	13.358	16.3537	11.3483	8.93251	13.851	22.671	15.2988	18.1594	39.7856	44.6118	43.0187	40.8377	39.3883	49.7874	2.31073	2.18651	3.13744	26.8414	17.8519	21.4395
XLOC_064420	hypothetical protein PRUPE_ppa000592mg [Prunus persica]	0.924219	1.86685	1.46708	1.72422	1.57805	3.03766	0.118022	0.462881	16.781	22.6629	28.1316	23.0119	18.211	0.843063	0.67898	0.991181	0	0.786331	13.4794	1.32572	3.12046
XLOC_034371	PREDICTED: uncharacterized LOC101223672, partial [Cucumis sativus]	0	0	0	0	0	0	0	0	0	0	0	0	0.659342	1.86964	1.50819	0	0	0	0	6.40656	6.52647
XLOC_005312	Ubiquitin carboxyl-terminal hydrolase 13 [Aegilops tauschii]	0.589478	0.186444	0.428086	0.674117	0.313919	0.391985	16.8604	7.51846	8.57549	13.8304	12.4259	18.6954	12.4329	15.0991	10.1872	1.10029	0	0.78956	2.99612	8.04454	5.67366
XLOC_062646	predicted protein [Hordeum vulgare subsp. vulgare]	0	0	0	0	0	0	0	0	0	0	0	0	0	0	0	0	18.6736	5.8854	0	15.5575	6.05595
XLOC_048195	PREDICTED: uncharacterized protein LOC101757142 [Setaria italica]	0	0	0.214239	1.635	1.25179	1.80852	7.40747	17.8101	0	1.05379	0.726816	0.231391	0.320835	1.11368	0.185398	7.1803	8.30901	4.21793	4.177	18.8134	23.5534
XLOC_000197	expressed protein [Oryza sativa Japonica Group]	0	0	0	0	0	0	0.710598	1.45933	0	0.406456	0.41702	0.500813	0	0.144123	0	0	0	0	0	0	0
XLOC_034478	Rhicadhesin receptor precursor, putative [Ricinus communis] >gi|223529186|gb|EEF31162.1| Rhicadhesin receptor precursor, putative [Ricinus communis]	1.24437	0.51209	0.783858	0.991096	0.570531	0.715281	0	0.360998	0	0.104786	0	0	0	1.03953	4.04646	1.20243	0	0	0	0	0.0480131
XLOC_065179	unnamed protein product [Vitis vinifera]	4.13987	3.73781	2.68497	3.72687	4.51733	3.13318	8.79046	1.58067	23.6684	11.8549	14.1015	14.6649	13.3126	7.55921	32.2231	0	0	5.21876	22.2343	3.90701	4.35479
XLOC_027758	beta-tubulin 6 [Oryza sativa Indica Group]	32.7218	23.0026	22.3379	31.8033	29.3693	28.5357	2.33263	9.62198	84.5993	202.335	94.3202	158.408	137.4	2.73391	5.9435	1.68328	0	2.68556	109.283	9.30387	14.3847
XLOC_078569	Calcium-dependent lipid-binding family protein isoform 1 [Theobroma cacao] >gi|508720261|gb|EOY12158.1| Calcium-dependent lipid-binding family protein isoform 1 [Theobroma cacao]	11.81	11.4183	11.473	13.6086	11.8827	12.7246	39.5728	18.6836	13.3726	15.2612	14.7028	11.5678	10.7939	8.95009	7.91796	4.05476	4.2808	3.3103	13.5434	9.54175	14.4633
XLOC_070260	PREDICTED: coatomer subunit gamma-like [Cicer arietinum]	0	0	0	0	0	0	0.912466	11.6783	0	0	0	0	0	0	0	0	0	0	0.0363368	0	0.0183109
XLOC_002967	Polynucleotidyl transferase, putative isoform 1 [Theobroma cacao]	28.9764	26.6099	22.1126	30.5714	30.1132	22.8727	63.1609	42.985	8.45609	8.17471	10.5103	7.64918	7.00286	7.2887	10.0129	5.40075	2.31461	3.55489	7.52903	17.0124	16.0145
XLOC_041737	PREDICTED: putative pentatricopeptide repeat-containing protein At5g09950-like [Vitis vinifera]	5.51641	7.87638	7.35705	5.70417	7.18033	9.99667	0.649841	0.279925	3.09682	11.981	10.8456	18.7035	6.75107	5.79737	1.25945	2.95575	0	0	14.3519	4.44977	10.2435
XLOC_032755	PREDICTED: translation initiation factor eIF-2B subunit beta-like [Fragaria vesca subsp. vesca]	92.7723	96.5339	173.628	203.621	152.777	107.066	152.524	18.2868	5.70178	131.784	218.439	326.73	120.751	54.2855	182.002	0	0	0	14.892	31.9679	39.8681
XLOC_068094	hypothetical protein TRIUR3_11843 [Triticum urartu]	0.0897038	0	5.42e-07	0.0301398	0	0	4.63603	3.10386	95.529	71.4509	87.6931	80.3115	80.4959	85.2656	54.3731	39.1768	42.5371	73.9941	242.546	98.8222	128.644
XLOC_051468	RNA-dependent RNA polymerase 2-like [Cucumis sativus] >gi|316989905|gb|ADU77018.1| RNA-dependent RNA polymerase 2 [Cucumis sativus]	1.59375	1.30064	1.81897	2.19795	1.50127	1.38213	3.04485	1.61097	4.86787	2.92461	4.40227	3.61559	4.50179	2.279	0.67851	0.254767	1.00301	0.361661	2.41074	4.03805	8.36173
XLOC_055674	PREDICTED: insulin-degrading enzyme-like [Glycine max]	20.8795	16.5827	13.0816	13.4363	12.2344	9.35921	4.40334	3.93136	0.761549	1.32805	1.04154	1.00664	1.184	2.81487	2.69219	3.51159	0	1.32673	7.95286	2.30448	3.43063
XLOC_040000	PREDICTED: probable ubiquitin-conjugating enzyme E2 23-like [Vitis vinifera]	217.948	468.048	147.454	158.282	390.031	367.64	0	45.0488	107.919	183.867	488.747	534.024	341.523	275.032	514.609	0	0	0	73.6555	96.2645	212.833
XLOC_082780	PREDICTED: uncharacterized protein LOC100843766 [Brachypodium distachyon]	533.56	684.823	596.407	670.303	714.736	630.349	599.775	475.303	245.905	277.166	383.753	309.393	338.823	151.515	232.942	2806.78	2215.61	2630.67	837.599	592.915	406.043
XLOC_027123	unnamed protein product [Vitis vinifera]	1.82038	1.26391	1.32642	2.14977	1.47986	1.62396	2.16639	2.17518	1.36669	1.8086	2.56627	2.4221	2.36969	5.72884	6.713	0.268416	0	0.409042	0.715621	0.964225	1.44311
XLOC_078158	unknown [Zea mays]	0	0	0	0	0	0	8.17141	8.83604	2.9545	0.255711	0.261164	0.252243	4.74699	0.182897	4.5531	33.4003	18.122	17.8334	16.3883	14.2391	14.9097
XLOC_043236	SET domain protein [Populus trichocarpa] >gi|222859085|gb|EEE96632.1| SET domain protein [Populus trichocarpa]	11.1111	7.36645	9.99691	10.9003	8.4869	8.05852	1.45325	1.96835	2.57393	11.9505	13.9484	11.1092	9.17857	4.08893	4.54813	2.03892	2.79826	3.63205	6.4562	2.34147	5.29764
XLOC_081059	unknown protein [Oryza sativa Japonica Group] >gi|33146932|dbj|BAC79966.1| unknown protein [Oryza sativa Japonica Group]	7.13454	29.556	40.8703	14.0975	25.5064	21.3518	24.7939	27.018	22.8876	24.9796	23.5142	20.4263	19.2655	17.3729	8.86001	8.15109	5.16145	5.95259	8.30056	2.67523	2.09736
XLOC_004049	PREDICTED: mitochondrial import inner membrane translocase subunit tim22 [Vitis vinifera] >gi|297745845|emb|CBI15901.3| unnamed protein product [Vitis vinifera]	2.16972	1.5562	2.32083	1.79406	2.30518	1.6672	3.46312	1.96523	1.43801	2.26937	1.53375	1.74817	1.42542	2.61899	4.10874	0	1.24814	0.806998	0.694086	0	1.9742
XLOC_027211	Aminoalcoholphosphotransferase 1 isoform 1 [Theobroma cacao]	729.36	885.776	906.257	858.38	879.24	902.062	341.264	147.954	203.556	993.938	1650.16	1277.61	850.436	378.326	319.261	67.0479	61.4939	58.2996	182.982	262.072	221.536
XLOC_042805	hypothetical protein ZEAMMB73_720282 [Zea mays]	4.70001	3.84952	4.69347	4.51919	2.57853	4.01652	3.3029	2.0965	14.6447	17.2202	17.0488	12.1654	13.4278	16.12	11.8204	0	0	0	1.61399	2.57791	3.97258
XLOC_008933	unknown [Picea sitchensis]	22.3814	25.8005	19.559	18.72	21.5916	19.8597	15.5434	15.1681	92.8356	89.6091	86.7943	97.5356	71.1623	97.2566	57.9958	37.5329	22.9021	27.2073	13.0977	33.486	38.9155
XLOC_073678	unknown [Zea mays]	1.843	1.84511	2.54727	2.58121	1.69563	1.64305	2.90832	0.907127	0.954578	0.151903	0.195225	0.189593	0	0.215965	1.08608	0	0	0	0.627536	0.518589	1.22171
XLOC_055785	predicted protein [Populus trichocarpa] >gi|222857201|gb|EEE94748.1| predicted protein [Populus trichocarpa]	0.70596	1.41555	1.68359	0.446891	1.32733	1.37942	8.29612	3.55612	6.71024	1.28114	1.45954	1.3774	1.0025	87.2943	174.466	42.2957	45.9502	98.0774	31.2778	9.80995	14.2782
XLOC_039941	PREDICTED: uncharacterized protein LOC100265091 [Vitis vinifera]	8.02655	10.0285	7.56051	8.86455	6.28597	7.24533	4.90212	0.496881	2.32288	6.81495	8.11478	6.93647	5.59214	11.4773	17.3988	0	0	0	3.34011	1.01235	1.54593
XLOC_012332	hypothetical protein M569_04731, partial [Genlisea aurea]	12.9346	11.2478	16.0558	14.7793	10.4688	18.6888	1.04487	0.947595	6.69023	4.95374	0.75098	0.486717	0.210377	0	1.05607	0	0	0	5.19387	2.00427	1.75406
XLOC_060769	hypothetical protein PRUPE_ppa000211mg [Prunus persica]	184.769	248.973	123.797	86.1824	67.9442	93.5466	0	4.49985	57.2736	323.496	438.352	506.82	281.669	19.0804	23.1735	30.5495	0	0	14.5958	64.1539	6.48031
XLOC_022076	PREDICTED: uncharacterized LOC101209112 [Cucumis sativus]	0.24904	0.72336	0	0.355153	0.400897	0.168176	0	0.990931	0	1.66188	2.51988	0.912173	1.88559	0.854553	0	0	0	0	0.331698	1.71046	0.127942
XLOC_000065	PREDICTED: probable LRR receptor-like serine/threonine-protein kinase At1g56130-like isoform 1 [Solanum lycopersicum] >gi|460405771|ref|XP_004248348.1| PREDICTED: probable LRR receptor-like serine/threonine-protein kinase At1g56130-like isoform 2 [Solanum lycopersicum]	5.21371	4.93324	7.38987	6.05146	5.9357	5.83729	19.3812	9.93886	15.3265	10.4586	10.8215	9.09266	14.0551	42.569	30.24	18.6966	23.9512	19.4629	12.9631	7.72108	14.0978
XLOC_061924	PREDICTED: uncharacterized protein LOC100846101 [Brachypodium distachyon]	9.51805	10.0474	19.8142	10.26	8.99337	10.3534	39.8314	16.6937	19.6391	24.5494	23.1457	21.0625	19.8721	184.322	170.43	98.7487	98.0762	105.305	27.7832	10.912	12.0221
XLOC_055573	PREDICTED: tubulin beta-1 chain [Vitis vinifera]	177.33	152.097	110.191	183.288	146.614	114.343	5.02582	40.0233	73.4716	91.8507	93.2525	52.4051	36.4375	0.34334	0.216291	51.1178	76.5605	54.7519	55.239	41.6501	24.9899
XLOC_004391	hypothetical protein PRUPE_ppa001568mg [Prunus persica]	25.6456	22.0223	20.526	33.1848	22.402	20.3568	11.3539	15.807	5.08866	8.21326	9.94822	9.83653	10.7445	8.46907	5.77261	2.1113	2.94407	2.95068	16.4318	9.89358	18.5431
XLOC_073429	unnamed protein product [Vitis vinifera]	0.597414	1.54175	1.14643	0.742582	0.657396	0.574186	1.53737	0.931518	1.88582	0.228267	0.426709	1.0707	0.824411	1.18763	1.5277	0	0	0	8.9e-05	0.931869	0.629402
XLOC_064326	PREDICTED: chaperone protein dnaJ 11, chloroplastic-like [Cucumis sativus]	0.0747832	0.337841	5.52e-05	0.00162561	0.00118148	0.316421	7.3948	3.21786	1.1281	0.504436	0.0625702	0.679198	0.47585	0.979302	1.98216	38.0734	36.5969	22.0239	5.89085	2.33351	2.90546
XLOC_079186	Photosystem I reaction center subunit XI, chloroplast precursor, putative [Ricinus communis] >gi|223533377|gb|EEF35128.1| Photosystem I reaction center subunit XI, chloroplast precursor, putative [Ricinus communis]	91.8814	131.335	182.043	61.8667	94.1928	161.979	793.821	245.118	39.5728	17.0044	27.9355	25.4841	19.3835	1061.22	2209.62	521.686	451.133	629.179	291.308	232.203	308.79
XLOC_021680	hypothetical protein SORBIDRAFT_06g015125 [Sorghum bicolor] >gi|241937571|gb|EES10716.1| hypothetical protein SORBIDRAFT_06g015125 [Sorghum bicolor]	8.10448	7.69964	7.68182	9.30521	8.28059	8.11985	11.1166	9.31197	7.84648	14.1748	16.3373	13.3056	15.4557	9.24742	9.85483	1.01378	3.02327	1.93072	7.62848	7.92613	8.69005
XLOC_025715	PREDICTED: putative RNA polymerase II subunit B1 CTD phosphatase RPAP2 homolog [Setaria italica]	5.40178	5.50657	8.21612	7.65989	5.47311	6.07624	7.99405	4.78081	2.77989	4.30189	4.17356	5.00724	5.72335	3.48077	3.18767	1.11941	1.69221	1.22334	0.350082	0.665193	0.883218
XLOC_057961	predicted protein [Populus trichocarpa] >gi|222857683|gb|EEE95230.1| predicted protein [Populus trichocarpa]	4.36832	4.72905	5.95258	3.62802	4.42994	3.61854	4.89414	4.16127	12.7102	7.85175	5.97475	6.34201	6.55663	7.68639	6.4936	12.7204	5.33233	13.9421	11.0893	1.96633	3.92605
XLOC_077092	protein with unknown function [Ricinus communis] >gi|223531184|gb|EEF33031.1| protein with unknown function [Ricinus communis]	5.00255	5.43663	7.92126	5.5964	3.72782	6.47607	17.0847	1.74659	3.61646	4.67774	11.4654	16.6069	4.60102	16.458	11.773	34.5625	12.242	0	3.01863	19.0737	3.49361
XLOC_048461	DNAse I-like superfamily protein [Theobroma cacao]	0.0387066	0.0706357	0.121728	0.0259683	0.120614	0.199275	1.60617	0.247185	0	0.144655	0.0835712	0.0995782	0.0183507	0.122767	0.044495	0	0.563086	0.645627	0.261569	0	0.0438011
XLOC_091077	PREDICTED: ethylene-responsive transcription factor ERF114-like [Vitis vinifera]	0.0451624	0.103794	0.343917	0.0198531	0.0538593	0.0970853	2.83586	6.88775	0	0.194649	0.0927889	0.274981	0.348425	2.58102	0.138726	0.673305	1.80208	1.9766	3.93451	4.7008	5.40323
XLOC_056450	unknown [Zea mays] >gi|413917799|gb|AFW57731.1| hypothetical protein ZEAMMB73_755868 [Zea mays]	5.01618	4.90545	4.55724	5.63519	5.40431	9.10991	6.98542	8.4431	30.8929	15.1377	15.9769	12.7002	16.8731	12.1528	11.6357	44.2006	33.6766	41.1134	9.16329	39.7805	37.6574
XLOC_016856	PREDICTED: scarecrow-like protein 32-like [Cicer arietinum]	0	0	0	0	0	0	0	31.5635	0	0	46.0228	81.3622	0	0	0	0	0	0	147.868	40.6333	19.7063
XLOC_023472	histone H3 [Chlorokybus atmophyticus]	83.7629	110.874	91.5247	104.095	77.1915	78.0371	5.06856	21.8915	45.7512	71.1045	88.1523	82.1749	128.295	76.365	14.4101	120.381	36.0699	36.7553	96.0892	16.5983	7.0286
XLOC_046360	unknown [Glycine max]	16.8357	19.7253	17.7974	19.8851	20.1983	21.8096	12.4277	13.1292	0	0.400874	2.32223	1.84161	1.78724	24.0318	19.9507	2.03065	0	3.05492	11.3524	1.59914	1.0993
XLOC_015381	cbl-interacting protein kinase 20 [Arabidopsis lyrata subsp. lyrata] >gi|297309287|gb|EFH39711.1| cbl-interacting protein kinase 20 [Arabidopsis lyrata subsp. lyrata]	0.672647	0.740894	0.627581	1.28581	0.760748	0.75598	0.259924	0.124065	0	0.11104	0.240783	0.359047	0	0	0	0	0	0	0.107629	0	0
XLOC_007819	Alba DNA/RNA-binding protein [Theobroma cacao]	274.432	277.84	266.217	215.231	272.919	244.977	279.181	157.019	62.3934	61.3701	42.2347	81.7846	38.2155	72.9331	184.915	30.8282	38.6425	34.1049	47.1583	43.9338	63.9428
XLOC_026210	hypothetical protein OsI_07556 [Oryza sativa Indica Group]	18.1977	17.3391	16.5309	20.1437	17.8106	19.0597	21.066	19.8466	26.2173	33.0483	36.7577	37.2801	39.3751	19.7811	19.8357	12.0345	10.9588	16.1946	46.9676	16.378	22.4145
XLOC_089491	hypothetical protein OsJ_27665 [Oryza sativa Japonica Group]	3.77412	5.34691	3.18882	3.46752	4.52359	3.59941	7.39988	2.907	2.27031	0.99648	2.48796	2.61146	2.43337	0	0.13005	1.28601	1.28652	0.935008	4.26317	3.92939	7.74329
XLOC_072565	hypothetical protein OsJ_24557 [Oryza sativa Japonica Group]	0	0	0	0.107508	0.137957	0.17141	3.61584	3.71337	0.198286	0.147455	0.355823	0.146692	0.27662	19.9046	5.91758	2.4344	1.75352	1.90472	14.8631	1.72489	2.97453
XLOC_090640	hypothetical protein M569_01741 [Genlisea aurea]	2.62299	4.71406	3.25786	3.59087	3.88931	4.00446	0.291507	0.523627	0	2.69604	1.91888	0	0.90941	0	0	0	1.72619	2.32464	3.11981	1.2563	0.936167
XLOC_057434	hypothetical protein SORBIDRAFT_06g030050 [Sorghum bicolor] >gi|241939791|gb|EES12936.1| hypothetical protein SORBIDRAFT_06g030050 [Sorghum bicolor]	1.80338	1.50284	1.59151	2.3742	2.26004	1.88218	6.42326	5.53646	1.5235	2.75562	2.01052	2.68706	1.92144	3.48874	2.78882	0	0	0	0.408235	0.398273	0.398455
XLOC_051356	Polynucleotidyl transferase, ribonuclease H-like superfamily protein isoform 1 [Theobroma cacao]	2.43192	1.00569	3.18362	2.04582	2.73878	1.27032	0.684065	5.14584	0	0.163793	0	0	0.103013	0.0727056	0.375705	0	0	0.567542	0.181222	0.196451	0.482088
XLOC_035116	PREDICTED: uncharacterized protein LOC100845234 [Brachypodium distachyon]	0.0556268	0	0.594793	0	0	0.072516	0.470246	0.220698	0.0572454	0.0512136	0	0	0	0	0	0	0	0	0	0	0
XLOC_089605	unnamed protein product [Vitis vinifera]	120.542	135.159	38.3272	67.6762	59.9986	46.9062	4.13913	23.0402	50.8074	13.3128	26.9716	18.7631	15.6791	43.9016	31.7307	0	8.14593	6.92643	13.2622	12.512	14.7246
XLOC_016473	hypothetical protein OsI_34023 [Oryza sativa Indica Group]	29.3211	31.2699	41.8313	43.5175	28.4042	43.7254	35.3008	15.2921	82.2624	61.2231	57.6791	54.6933	48.1218	72.2911	51.987	8.4943	8.48465	5.84837	10.6552	18.2933	12.8803
XLOC_015331	unknown [Picea sitchensis]	13.219	17.6953	17.0078	21.8715	17.5858	18.8168	4.82445	2.45605	0	0	0	0	0	0	0	0	0	0	0	0	0
XLOC_066560	PREDICTED: FACT complex subunit SPT16-like [Vitis vinifera]	6.16646	5.47518	5.17272	7.50476	5.18763	4.7196	3.17532	1.60305	14.6571	13.6355	14.9499	15.1877	11.5388	7.87654	7.03509	0	0	0	6.67497	4.35514	7.47871
XLOC_019208	Nucleic acid binding protein, putative [Theobroma cacao]	0.0630912	0.155261	0.129221	0	0.110149	0	0.100379	0.228841	1.04e-05	0.16753	0.0897062	0.269634	0.391573	0	0	0	0	0	2.9679	2.18756	1.9801
XLOC_023724	unnamed protein product [Vitis vinifera]	24.6078	35.454	39.9116	21.2034	21.4567	25.9049	1.002	3.18767	8.07954	3.94522	1.7726	1.96028	1.04833	7.87233	10.4549	1.72765	2.53671	2.17915	16.3114	6.70619	7.91081
XLOC_051568	TPA: hypothetical protein ZEAMMB73_772052 [Zea mays] >gi|414878379|tpg|DAA55510.1| TPA: hypothetical protein ZEAMMB73_772052 [Zea mays]	9.80238	8.03528	9.70645	13.1401	9.73772	9.24341	13.3138	9.46606	8.39764	12.7877	15.3377	12.8178	11.6635	16.2626	18.6578	5.73269	6.6437	5.73533	6.18856	7.33026	9.40546
XLOC_069922	hypothetical protein OsI_16710 [Oryza sativa Indica Group]	0	0	0.189039	0.119412	0.137711	0.230126	2.44413	4.30746	0	0	0	0	0	0	0	0	0	0	0	0	0
XLOC_056268	putative phosphoenolpyruvate carboxylase [Saccharum hybrid cultivar R570]	6.52405	6.65231	10.3187	6.61949	8.26495	9.60635	16.9193	13.9271	27.7908	11.0497	22.9525	18.1589	20.8594	15.179	9.26449	41.73	78.8079	78.9367	138.662	23.9997	20.7859
XLOC_070114	unknown [Glycine max]	27.2943	20.7329	23.1674	22.5048	19.5246	28.2775	33.2079	16.9804	0	6.64113	6.33472	8.35678	0	0	8.68025	0	0	0	0	0	1.79819
XLOC_014583	unnamed protein product [Vitis vinifera]	2.30603	6.28943	6.77145	2.03721	3.35528	3.94457	0.795593	1.86571	5.57954	14.052	15.6725	16.6498	10.0824	27.0633	12.1484	1.87353	11.6936	10.5434	11.8627	26.8988	14.878
XLOC_062322	hypothetical protein PRUPE_ppa011384mg [Prunus persica]	1.12297	0.827997	1.29197	1.62842	0.233108	1.36119	0.710893	0.717561	0	0	0	0	0	0	0	0	0	0	0	0	0
XLOC_064392	PREDICTED: long chain acyl-CoA synthetase 2 [Vitis vinifera] >gi|297741400|emb|CBI32531.3| unnamed protein product [Vitis vinifera]	5.72736	7.78341	19.8932	7.42742	6.41594	14.881	5.44326	12.3611	8.60841	5.29044	4.97904	5.11869	3.38257	0.235841	7.20434	4.7699	5.38254	5.79007	13.8863	18.0877	29.9063
XLOC_087542	PREDICTED: receptor-like protein kinase HSL1-like [Brachypodium distachyon]	0.842484	0.77698	0.795209	1.01511	0.753893	0.625581	3.26975	3.47636	2.64225	3.67614	2.75303	1.87263	1.08507	2.1247	1.26894	0.297431	2.37945	2.53216	4.55912	6.89668	9.2983
XLOC_090319	UDP-N-acetylglucosamine transferase subunit ALG14 isoform 1 [Theobroma cacao] >gi|508780516|gb|EOY27772.1| UDP-N-acetylglucosamine transferase subunit ALG14 isoform 1 [Theobroma cacao]	2.15547	2.06901	2.93195	1.39851	2.69244	1.47353	7.7793	6.20487	0	0.788768	0.662995	0.351448	1.53496	2.57685	1.76727	0	0.000465092	5.9893	0	0	0.558287
XLOC_091619	Uncharacterized protein isoform 2 [Theobroma cacao]	1.5209	1.78222	4.57801	1.34809	1.76477	1.99126	4.09565	1.79423	4.87779	4.54298	3.73684	7.08382	2.95148	58.4769	85.8655	26.4019	26.0948	34.1969	15.1905	4.35717	11.7335
XLOC_027320	NAC transcription factor 035 [Jatropha curcas]	0.0403702	0	0.270418	0	0	0.276383	0.288425	0	0	0.0940727	0.0971807	0	0.129861	3.35364	6.06696	0	0	2.68492	0.998834	0.214542	0.309964
XLOC_084819	PREDICTED: probable calcium-binding protein CML17-like isoform 1 [Solanum lycopersicum] >gi|460400936|ref|XP_004245987.1| PREDICTED: probable calcium-binding protein CML17-like isoform 2 [Solanum lycopersicum] >gi|460400938|ref|XP_004245988.1| PREDICTED: probable calcium-binding protein CML17-like i...	8.09992	5.78777	9.15029	7.11922	7.8816	9.10128	16.8893	11.68	16.5202	14.6796	14.0752	15.6646	18.0096	17.9811	13.5378	21.5475	32.3343	30.275	13.6059	11.1628	9.62778
XLOC_025275	PREDICTED: peroxisomal membrane protein PEX14-like [Solanum lycopersicum]	58.5737	53.6193	81.3396	65.4801	45.9155	55.1239	169.304	62.9346	36.8714	157.693	202.347	177.084	165.583	107.631	124.134	55.9703	83.2157	34.4977	82.9975	62.6566	70.291
XLOC_042577	PREDICTED: uncharacterized protein LOC101765379 [Setaria italica]	1.89337	4.07064	6.38266	3.46848	1.9323	4.08993	6.60969	13.4208	1.94216	7.2467	7.22036	4.57801	14.0304	6.71232	10.0095	6.70019	7.52212	4.76753	9.5655	2.14361	2.52255
XLOC_005841	Os09g0284200 [Oryza sativa Japonica Group] >gi|50252540|dbj|BAD28714.1| putative protein phosphatase [Oryza sativa Japonica Group] >gi|50253107|dbj|BAD29354.1| putative protein phosphatase [Oryza sativa Japonica Group] >gi|113631007|dbj|BAF24688.1| Os09g0284200 [Oryza sativa Japonica Group] >gi|2157...	0.126423	0.224315	0	0.172443	0.18784	0	1.38949	0.524354	0	0.143664	0	0.278808	0.494191	0	0	0	0	0	0	0	0
XLOC_045576	PREDICTED: uncharacterized protein LOC100262291 [Vitis vinifera] >gi|296081186|emb|CBI18212.3| unnamed protein product [Vitis vinifera]	7.73425	7.41837	10.9444	8.55926	7.46491	10.5586	20.6956	13.1319	9.73063	11.5653	11.4385	14.2751	13.7977	23.883	22.9089	13.2711	9.74091	17.1617	16.999	11.8457	24.5191
XLOC_072648	Potassium transporter, putative isoform 1 [Theobroma cacao]	2.07726	1.70191	1.56294	1.5262	1.79669	1.70459	2.86811	1.15811	0	0.594512	0.309413	0.101643	0	2.11562	3.62042	0	0	0	0.488044	1.41927	2.55471
XLOC_050826	Multidrug resistance-associated protein 2 isoform 2, partial [Theobroma cacao]	18.9662	21.6734	15.8596	14.0959	21.1609	23.1238	22.1921	10.5333	13.8992	42.7758	44.3339	46.8641	30.3607	16.2316	12.8176	0	0	0	12.5114	30.2593	35.9654
XLOC_046796	PREDICTED: uncharacterized protein LOC101764908 isoform X2 [Setaria italica]	0	0	0	0	0	0	6.92875	3.56589	0	0	0	0	0	0	0	0	0	0	0	0	0
XLOC_040290	PREDICTED: uncharacterized protein LOC101260668 [Solanum lycopersicum]	2.47111	2.27268	3.11765	1.37601	1.95626	2.16169	7.61246	2.36191	5.02789	3.59612	3.416	3.52235	3.43161	49.609	97.441	3.32318	2.50837	2.47916	3.74113	96.6562	1070.77
XLOC_023757	PREDICTED: pleiotropic drug resistance protein 1-like [Vitis vinifera]	0.348406	1.40275	0	0	1.71175	0.973788	0	0	0	0	0	0	0	0	0	0	0	0	2.33996	0	0
XLOC_091808	predicted protein [Populus trichocarpa] >gi|222861624|gb|EEE99166.1| predicted protein [Populus trichocarpa]	2.65754	1.95159	1.56015	2.42255	2.47407	1.97408	24.1939	20.3894	40.7886	34.6536	38.6503	33.2446	37.2891	77.2963	69.7712	46.1474	45.909	38.912	35.84	36.1461	39.8233
XLOC_055195	Protein STRUBBELIG-RECEPTOR FAMILY 8 [Aegilops tauschii]	30.4567	29.9085	32.7195	31.2348	32.6973	28.3108	154.835	76.2602	36.697	33.4807	37.9049	34.8012	32.2614	61.2214	120.28	88.4802	73.741	76.594	54.5131	30.0117	60.1145
XLOC_091861	Transducin/WD40 repeat-like superfamily protein, putative isoform 1 [Theobroma cacao]	3.85182	3.41934	2.68243	2.85323	3.42019	3.19278	2.87243	3.85859	10.8187	17.91	16.1223	16.9648	12.6386	6.82953	5.34151	2.39087	5.6618	1.91857	3.37558	8.43893	9.94291
XLOC_082226	Actin-related protein 5 [Theobroma cacao]	10.6087	7.41772	10.3483	10.0737	5.34433	5.01592	3.04422	1.5947	19.5839	14.7163	14.9424	16.2512	12.4852	3.15019	4.38895	0	0	1.42477	4.81646	1.14685	1.01407
[truncated: 53,081 more rows]

## Sheet: Dataset S2
Dataset S2: Summary of Phalaenopsis genes isoform
[truncated: 76,371 more rows]

[truncated: 11 more sheets: Dataset S3, Dataset S4, Dataset S5, Dataset S6, Dataset S7, Dataset S8, Dataset S9, Dataset S10, Dataset S11, Dataset S12, Dataset S14]
