# Supplementary material for: The genome and transcriptome of Phalaenopsis yield insights into floral organ development and flowering regulation
Source: PeerJ. 2016 May 12;4:e2017. doi: 10.7717/peerj.2017 (PMC4868593; doi:10.7717/peerj.2017)
Supplement: Supplemental Information 4 [file peerj-04-2017-s004.xlsx]

## Sheet: 工作表1
Dataset S16-1: Distribution of SNPs identified between the Phalaenopsis accessions 'KHM190' and 'B8802'
Mapping	Reference Position	Type	Length	Reference	Allele	Zygosity	Count	Coverage	Frequency	Forward/reverse balance	Average quality	Type
NODE_4_length_19593_cov_51.879856 mapping	5146	SNV	1	T	C	Homozygous	10	10	100	0.4	35.5	intergenic
NODE_4_length_19593_cov_51.879856 mapping	5155	MNV	2	GT	AC	Homozygous	10	10	100	0.4	36.65	intergenic
NODE_4_length_19593_cov_51.879856 mapping	5178	SNV	1	C	A	Homozygous	13	13	100	0.307692	33.8462	intergenic
NODE_4_length_19593_cov_51.879856 mapping	5189	SNV	1	C	A	Homozygous	10	10	100	0.4	38.2	intergenic
NODE_4_length_19593_cov_51.879856 mapping	5207	SNV	1	C	A	Homozygous	10	10	100	0.4	36.8	intergenic
NODE_4_length_19593_cov_51.879856 mapping	5234	SNV	1	T	G	Homozygous	10	10	100	0.4	35.6	intergenic
NODE_4_length_19593_cov_51.879856 mapping	5252	SNV	1	A	G	Homozygous	12	12	100	0.416667	33.4167	intergenic
NODE_4_length_19593_cov_51.879856 mapping	5262	SNV	1	A	G	Homozygous	11	11	100	0.454545	35.9091	intergenic
NODE_4_length_19593_cov_51.879856 mapping	5264	SNV	1	T	C	Homozygous	11	11	100	0.454545	34.1818	intergenic
NODE_4_length_19593_cov_51.879856 mapping	5277	MNV	2	TG	CA	Homozygous	11	11	100	0.363636	34.9545	intergenic
NODE_4_length_19593_cov_51.879856 mapping	5411	MNV	2	AC	GT	Homozygous	10	10	100	0.4	34.35	intergenic
NODE_593_length_3281_cov_61.935997 mapping	1857	SNV	1	G	A	Homozygous	11	11	100	0.363636	39.1818	intergenic
NODE_593_length_3281_cov_61.935997 mapping	1893	Deletion	1	G	-	Homozygous	12	12	100	0.461538	39.4615	intergenic
NODE_593_length_3281_cov_61.935997 mapping	1898	SNV	1	T	A	Homozygous	13	13	100	0.428571	39.8571	intergenic
NODE_593_length_3281_cov_61.935997 mapping	1904	SNV	1	T	C	Homozygous	14	14	100	0.466667	38.8	intergenic
NODE_593_length_3281_cov_61.935997 mapping	1908	Deletion	1	T	-	Homozygous	14	14	100	0.466667	38.4	intergenic
NODE_593_length_3281_cov_61.935997 mapping	1917	Insertion	1	-	A	Homozygous	13	13	100	0.5	39.7143	intergenic
NODE_593_length_3281_cov_61.935997 mapping	1925	SNV	1	C	T	Homozygous	10	10	100	0.363636	39.5455	intergenic
NODE_593_length_3281_cov_61.935997 mapping	1944	SNV	1	T	A	Homozygous	13	14	92.8571	0.461538	35.6154	intergenic
NODE_593_length_3281_cov_61.935997 mapping	2163	SNV	1	A	G	Homozygous	10	10	100	0.2	40.2	intergenic
NODE_593_length_3281_cov_61.935997 mapping	2173	SNV	1	C	A	Homozygous	10	10	100	0.3	40.2	intergenic
NODE_1023_length_7620_cov_47.830841 mapping	2609	SNV	1	T	C	Homozygous	12	12	100	0.5	36.25	intergenic
NODE_1023_length_7620_cov_47.830841 mapping	2614	SNV	1	A	C	Homozygous	12	12	100	0.5	37.6667	intergenic
NODE_1023_length_7620_cov_47.830841 mapping	2616	SNV	1	C	T	Homozygous	12	12	100	0.5	36.6667	intergenic
NODE_1023_length_7620_cov_47.830841 mapping	2626	SNV	1	A	T	Homozygous	11	11	100	0.454545	34.8182	intergenic
NODE_1023_length_7620_cov_47.830841 mapping	2768	SNV	1	A	G	Homozygous	10	10	100	0.4	36.2	intergenic
NODE_1038_length_14491_cov_68.924988 mapping	2779	SNV	1	C	T	Homozygous	10	10	100	0.4	39.5	intergenic
NODE_1038_length_14491_cov_68.924988 mapping	2825	SNV	1	A	T	Homozygous	10	10	100	0.2	39.7	intergenic
NODE_1038_length_14491_cov_68.924988 mapping	2835	SNV	1	A	C	Homozygous	10	10	100	0.2	39	intergenic
NODE_1038_length_14491_cov_68.924988 mapping	2841	SNV	1	C	T	Homozygous	10	10	100	0.2	31.9	intergenic
NODE_1038_length_14491_cov_68.924988 mapping	2967	SNV	1	A	G	Heterozygous	3	12	25	0.333333	38.6667	intergenic
NODE_1038_length_14491_cov_68.924988 mapping	2969	SNV	1	C	A	Heterozygous	4	12	33.3333	0.5	38.25	intergenic
NODE_1038_length_14491_cov_68.924988 mapping	2989	SNV	1	T	C	Heterozygous	4	12	33.3333	0.25	35.75	intergenic
NODE_1038_length_14491_cov_68.924988 mapping	2993	SNV	1	C	T	Homozygous	11	11	100	0.363636	37.3636	intergenic
NODE_1038_length_14491_cov_68.924988 mapping	2998	SNV	1	G	A	Homozygous	12	12	100	0.333333	39.6667	intergenic
NODE_1038_length_14491_cov_68.924988 mapping	3004	SNV	1	G	A	Homozygous	13	13	100	0.307692	39	intergenic
NODE_1038_length_14491_cov_68.924988 mapping	3007	SNV	1	T	A	Homozygous	13	13	100	0.307692	39.0769	intergenic
NODE_1038_length_14491_cov_68.924988 mapping	3009	SNV	1	G	A	Homozygous	13	13	100	0.307692	39.2308	intergenic
NODE_1038_length_14491_cov_68.924988 mapping	3017	SNV	1	C	A	Heterozygous	12	17	70.5882	0.333333	37.0833	intergenic
NODE_1038_length_14491_cov_68.924988 mapping	3020	SNV	1	C	T	Homozygous	17	17	100	0.352941	38.3529	intergenic
NODE_1038_length_14491_cov_68.924988 mapping	3039	SNV	1	A	T	Homozygous	14	14	100	0.428571	39.1429	intergenic
NODE_1038_length_14491_cov_68.924988 mapping	3041	SNV	1	A	G	Homozygous	14	14	100	0.428571	39	intergenic
NODE_1038_length_14491_cov_68.924988 mapping	3043	SNV	1	G	A	Homozygous	14	14	100	0.428571	38.7143	intergenic
NODE_1038_length_14491_cov_68.924988 mapping	3255	Deletion	1	T	-	Homozygous	10	10	100	0.3	38.4	intergenic
NODE_1038_length_14491_cov_68.924988 mapping	3257	SNV	1	A	T	Homozygous	10	10	100	0.3	38.1	intergenic
NODE_1038_length_14491_cov_68.924988 mapping	3263	SNV	1	G	A	Homozygous	11	11	100	0.454545	36.6364	intergenic
NODE_1038_length_14491_cov_68.924988 mapping	3287	SNV	1	G	A	Homozygous	13	13	100	0.307692	39.5385	intergenic
NODE_1038_length_14491_cov_68.924988 mapping	3295	SNV	1	T	C	Homozygous	13	13	100	0.230769	39.6154	intergenic
NODE_1038_length_14491_cov_68.924988 mapping	3308	SNV	1	G	A	Homozygous	10	11	90.9091	0.3	39.9	intergenic
NODE_1038_length_14491_cov_68.924988 mapping	3331	SNV	1	C	A	Homozygous	10	10	100	0.1	39.2	intergenic
NODE_1038_length_14491_cov_68.924988 mapping	9971	SNV	1	T	C	Homozygous	10	10	100	0.2	36.6	intergenic
NODE_1038_length_14491_cov_68.924988 mapping	9978	SNV	1	T	A	Homozygous	10	10	100	0.3	36.4	intergenic
NODE_1038_length_14491_cov_68.924988 mapping	10053	SNV	1	G	T	Homozygous	15	15	100	0.4	37.7333	intergenic
NODE_1038_length_14491_cov_68.924988 mapping	10244	SNV	1	G	T	Homozygous	14	14	100	0.214286	39.3571	intergenic
NODE_1038_length_14491_cov_68.924988 mapping	10246	SNV	1	G	A	Homozygous	14	14	100	0.214286	38.7857	intergenic
NODE_1038_length_14491_cov_68.924988 mapping	10257	SNV	1	A	T	Homozygous	10	10	100	0.3	39.2	intergenic
NODE_1038_length_14491_cov_68.924988 mapping	13758	MNV	2	CA	TG	Homozygous	10	10	100	0.4	32.45	intergenic
NODE_1038_length_14491_cov_68.924988 mapping	13774	SNV	1	C	A	Homozygous	13	13	100	0.307692	36.9231	intergenic
NODE_1038_length_14491_cov_68.924988 mapping	13787	SNV	1	A	G	Homozygous	12	12	100	0.333333	38.5	intergenic
NODE_1038_length_14491_cov_68.924988 mapping	13791	MNV	2	TC	CA	Homozygous	12	12	100	0.333333	35.7083	intergenic
NODE_1038_length_14491_cov_68.924988 mapping	13799	SNV	1	G	A	Homozygous	13	13	100	0.307692	34.5385	intergenic
NODE_1038_length_14491_cov_68.924988 mapping	13817	SNV	1	T	A	Homozygous	13	13	100	0.307692	38.6923	intergenic
NODE_1038_length_14491_cov_68.924988 mapping	13826	SNV	1	A	G	Homozygous	12	12	100	0.25	37.6667	intergenic
NODE_1038_length_14491_cov_68.924988 mapping	13835	SNV	1	A	G	Homozygous	10	10	100	0.3	36.5	intergenic
NODE_1647_length_2723_cov_59.766434 mapping	356	Deletion	1	A	-	Homozygous	13	13	100	0.461538	36.6923	intergenic
NODE_1647_length_2723_cov_59.766434 mapping	375	SNV	1	T	C	Heterozygous	4	12	33.3333	0.25	40.5	intergenic
NODE_1647_length_2723_cov_59.766434 mapping	379	SNV	1	C	T	Homozygous	10	11	90.9091	0.4	39.9	intergenic
NODE_2187_length_1393_cov_3938.935303 mapping	83	SNV	1	C	A	Homozygous	183	184	99.4565	0.0531915	38.0372	intergenic
NODE_2187_length_1393_cov_3938.935303 mapping	123	SNV	1	A	C	Homozygous	195	200	97.5	0.138462	38.2308	intergenic
NODE_2187_length_1393_cov_3938.935303 mapping	532	SNV	1	A	C	Homozygous	298	298	100	0.365772	38.1946	intergenic
NODE_2187_length_1393_cov_3938.935303 mapping	557	SNV	1	T	G	Homozygous	237	270	87.7778	0.295359	36.9241	intergenic
NODE_2187_length_1393_cov_3938.935303 mapping	711	SNV	1	C	A	Homozygous	349	350	99.7143	0.461318	37.6648	intergenic
NODE_2187_length_1393_cov_3938.935303 mapping	714	SNV	1	T	A	Homozygous	349	350	99.7143	0.461318	37.8682	intergenic
NODE_2187_length_1393_cov_3938.935303 mapping	716	SNV	1	A	C	Homozygous	348	350	99.4286	0.45977	37.7328	intergenic
NODE_2187_length_1393_cov_3938.935303 mapping	739	SNV	1	G	T	Homozygous	321	365	87.9452	0.450311	38.0652	intergenic
NODE_2187_length_1393_cov_3938.935303 mapping	995	SNV	1	G	T	Homozygous	335	385	87.013	0.485207	37.0148	exon
NODE_2505_length_5029_cov_59.941143 mapping	3722	SNV	1	C	A	Homozygous	10	10	100	0.5	38.3	intergenic
NODE_2505_length_5029_cov_59.941143 mapping	3738	Insertion	1	-	G	Homozygous	10	10	100	0.5	40.1	intergenic
NODE_2505_length_5029_cov_59.941143 mapping	3748	SNV	1	G	A	Homozygous	10	11	90.9091	0.4	39	intergenic
NODE_2505_length_5029_cov_59.941143 mapping	4522	SNV	1	T	G	Homozygous	10	10	100	0.4	38	intergenic
NODE_2505_length_5029_cov_59.941143 mapping	4530	SNV	1	A	T	Homozygous	10	10	100	0.4	36.9	intergenic
NODE_2505_length_5029_cov_59.941143 mapping	4541	SNV	1	C	T	Homozygous	12	12	100	0.333333	38.5833	intergenic
NODE_2505_length_5029_cov_59.941143 mapping	4551	SNV	1	T	A	Homozygous	11	11	100	0.363636	39.8182	intergenic
NODE_2505_length_5029_cov_59.941143 mapping	4555	MNV	2	AA	TC	Homozygous	11	11	100	0.363636	39.0455	intergenic
NODE_2505_length_5029_cov_59.941143 mapping	4810	SNV	1	A	G	Homozygous	12	12	100	0.333333	37.3333	intergenic
NODE_2505_length_5029_cov_59.941143 mapping	4829	SNV	1	C	T	Homozygous	11	11	100	0.272727	39.3636	intergenic
NODE_3110_length_2196_cov_80.324684 mapping	258	SNV	1	T	A	Homozygous	11	11	100	0.454545	39	exon
NODE_3110_length_2196_cov_80.324684 mapping	287	SNV	1	T	A	Homozygous	12	12	100	0.416667	38.25	exon
NODE_3110_length_2196_cov_80.324684 mapping	423	SNV	1	C	A	Homozygous	12	12	100	0.5	37.3333	exon
NODE_3110_length_2196_cov_80.324684 mapping	434	SNV	1	T	C	Homozygous	11	11	100	0.454545	38.2727	exon
NODE_3110_length_2196_cov_80.324684 mapping	438	SNV	1	A	T	Homozygous	11	11	100	0.454545	38.0909	exon
NODE_3110_length_2196_cov_80.324684 mapping	454	SNV	1	T	C	Homozygous	12	12	100	0.5	37.4167	exon
NODE_3110_length_2196_cov_80.324684 mapping	468	SNV	1	T	A	Homozygous	12	12	100	0.5	37.6667	exon
NODE_3110_length_2196_cov_80.324684 mapping	472	SNV	1	A	T	Homozygous	12	12	100	0.5	37.75	exon
NODE_3110_length_2196_cov_80.324684 mapping	475	SNV	1	T	G	Homozygous	12	12	100	0.5	36.75	exon
NODE_3110_length_2196_cov_80.324684 mapping	497	SNV	1	G	C	Homozygous	10	10	100	0.4	38.6	exon
NODE_3110_length_2196_cov_80.324684 mapping	1390	SNV	1	G	T	Homozygous	11	11	100	0.363636	35.9091	exon
NODE_3110_length_2196_cov_80.324684 mapping	1414	SNV	1	G	T	Homozygous	11	11	100	0.454545	35.3636	exon
NODE_3110_length_2196_cov_80.324684 mapping	1564	SNV	1	G	A	Homozygous	12	12	100	0.5	35.75	exon
NODE_3301_length_17904_cov_43.644882 mapping	16626	SNV	1	T	C	Heterozygous	6	10	60	0.333333	39.5	exon
NODE_3301_length_17904_cov_43.644882 mapping	16628	SNV	1	A	G	Homozygous	10	10	100	0.3	37.6	exon
NODE_3235_length_12763_cov_28.738150 mapping	1910	SNV	1	A	C	Heterozygous	5	11	45.4545	0.4	38	intergenic
NODE_3235_length_12763_cov_28.738150 mapping	1913	SNV	1	C	A	Heterozygous	6	11	54.5455	0.166667	36.1667	intergenic
NODE_3235_length_12763_cov_28.738150 mapping	1917	SNV	1	A	C	Homozygous	11	11	100	0.363636	37.3636	intergenic
NODE_3235_length_12763_cov_28.738150 mapping	1928	MNV	2	CC	TT	Heterozygous	8	13	61.5385	0.125	37.6818	intergenic
NODE_3235_length_12763_cov_28.738150 mapping	1930	SNV	1	G	A	Heterozygous	5	13	38.4615	0.4	38.1333	intergenic
NODE_3235_length_12763_cov_28.738150 mapping	11210	SNV	1	C	T	Homozygous	11	11	100	0.454545	38.5455	intergenic
NODE_3235_length_12763_cov_28.738150 mapping	11216	SNV	1	A	G	Homozygous	13	13	100	0.461538	38.4615	intergenic
NODE_3235_length_12763_cov_28.738150 mapping	11220	SNV	1	A	G	Homozygous	14	14	100	0.428571	37.7857	intergenic
NODE_3235_length_12763_cov_28.738150 mapping	11248	SNV	1	A	G	Heterozygous	5	11	45.4545	0.166667	38.5	intergenic
NODE_3235_length_12763_cov_28.738150 mapping	12548	SNV	1	C	T	Heterozygous	3	11	27.2727	0.333333	36.3333	intergenic
NODE_3235_length_12763_cov_28.738150 mapping	12559	SNV	1	C	T	Homozygous	11	11	100	0.454545	38.4545	intergenic
NODE_3570_length_18728_cov_42.771358 mapping	1045	SNV	1	C	T	Homozygous	10	10	100	0.5	39.1	intergenic
NODE_3570_length_18728_cov_42.771358 mapping	1048	SNV	1	G	C	Homozygous	10	10	100	0.5	39.9	intergenic
NODE_3570_length_18728_cov_42.771358 mapping	1059	SNV	1	A	C	Homozygous	10	10	100	0.5	37.7	intergenic
NODE_3570_length_18728_cov_42.771358 mapping	2789	SNV	1	T	C	Homozygous	10	10	100	0.4	38.5	intergenic
NODE_3570_length_18728_cov_42.771358 mapping	2792	SNV	1	C	T	Homozygous	10	10	100	0.4	39.6	intergenic
NODE_3570_length_18728_cov_42.771358 mapping	2820	SNV	1	T	C	Homozygous	12	13	92.3077	0.416667	37.0833	intergenic
NODE_3570_length_18728_cov_42.771358 mapping	2835	SNV	1	G	T	Homozygous	12	12	100	0.416667	38	intergenic
NODE_3570_length_18728_cov_42.771358 mapping	2838	SNV	1	A	G	Homozygous	12	12	100	0.416667	39.75	intergenic
NODE_3570_length_18728_cov_42.771358 mapping	2846	Deletion	2	AA	-	Homozygous	13	13	100	0.384615	38.28	intergenic
NODE_3570_length_18728_cov_42.771358 mapping	3803	SNV	1	C	T	Homozygous	4	10	40	0.5	38.25	intergenic
NODE_3570_length_18728_cov_42.771358 mapping	3805	MNV	2	CT	TG	Homozygous	10	10	100	0.2	34.1	intergenic
NODE_4025_length_1827_cov_55.267651 mapping	1231	SNV	1	C	T	Heterozygous	3	11	27.2727	0.333333	31	intergenic
NODE_4025_length_1827_cov_55.267651 mapping	1351	SNV	1	T	A	Homozygous	8	10	80	0.5	38.125	intergenic
NODE_4171_length_5172_cov_52.122391 mapping	4106	SNV	1	T	A	Homozygous	9	10	90	0.111111	38.5556	exon
NODE_4261_length_15573_cov_25.756372 mapping	3248	SNV	1	C	A	Homozygous	11	11	100	0.0909091	38.3636	intron
NODE_4261_length_15573_cov_25.756372 mapping	3250	SNV	1	T	G	Homozygous	11	11	100	0.0909091	37.6364	intron
NODE_4261_length_15573_cov_25.756372 mapping	3266	SNV	1	C	T	Homozygous	14	14	100	0.142857	38.5	intron
NODE_4261_length_15573_cov_25.756372 mapping	3270	SNV	1	T	C	Homozygous	13	13	100	0.153846	36.9231	intron
NODE_4261_length_15573_cov_25.756372 mapping	3288	SNV	1	C	T	Homozygous	12	12	100	0.166667	37.0833	intron
NODE_4261_length_15573_cov_25.756372 mapping	3292	Insertion	1	-	T	Heterozygous	6	12	50	0.166667	38.8333	intron
NODE_4261_length_15573_cov_25.756372 mapping	3294	SNV	1	G	T	Heterozygous	9	12	75	0.111111	39.1111	intron
NODE_4261_length_15573_cov_25.756372 mapping	3294	Deletion	1	G	-	Heterozygous	3	12	25	0.333333	39.6667	intron
NODE_4344_length_10407_cov_46.390987 mapping	10153	SNV	1	A	G	Homozygous	14	14	100	0.142857	37.4286	intergenic
NODE_4344_length_10407_cov_46.390987 mapping	10184	SNV	1	T	G	Homozygous	10	10	100	0.1	36.1	intergenic
NODE_4344_length_10407_cov_46.390987 mapping	10348	SNV	1	G	A	Heterozygous	2	11	18.1818	0.333333	33	intergenic
NODE_4344_length_10407_cov_46.390987 mapping	10359	SNV	1	A	C	Homozygous	10	10	100	0.1	34.8	intergenic
NODE_4344_length_10407_cov_46.390987 mapping	10365	SNV	1	C	T	Homozygous	10	10	100	0.1	36.6	intergenic
NODE_4344_length_10407_cov_46.390987 mapping	10388	Insertion	1	-	A	Homozygous	11	12	91.6667	0.0833333	36.5833	intergenic
NODE_4359_length_3791_cov_54.902401 mapping	3207	SNV	1	A	G	Homozygous	10	11	90.9091	0.5	39.1	intergenic
NODE_4318_length_11563_cov_31.085358 mapping	10623	SNV	1	A	T	Homozygous	13	13	100	0.461538	38.9231	intergenic
NODE_4318_length_11563_cov_31.085358 mapping	10783	SNV	1	C	T	Homozygous	11	11	100	0.454545	37.7273	intergenic
NODE_4318_length_11563_cov_31.085358 mapping	10801	SNV	1	G	T	Homozygous	10	10	100	0.5	40.2	intergenic
NODE_4318_length_11563_cov_31.085358 mapping	10807	SNV	1	A	G	Homozygous	10	10	100	0.5	39.4	intergenic
NODE_4318_length_11563_cov_31.085358 mapping	10812	SNV	1	C	G	Homozygous	10	10	100	0.5	39.5	intergenic
NODE_4318_length_11563_cov_31.085358 mapping	10820	SNV	1	G	C	Homozygous	11	11	100	0.454545	39.9091	intergenic
NODE_4318_length_11563_cov_31.085358 mapping	10827	SNV	1	A	C	Homozygous	12	12	100	0.416667	38.6667	intergenic
NODE_4318_length_11563_cov_31.085358 mapping	10834	MNV	2	AA	GT	Homozygous	12	12	100	0.416667	38.4167	intergenic
NODE_4641_length_6971_cov_51.009613 mapping	2386	SNV	1	A	C	Homozygous	11	11	100	0.454545	36.2727	intergenic
NODE_4641_length_6971_cov_51.009613 mapping	2397	SNV	1	A	G	Homozygous	12	12	100	0.5	35.4167	intergenic
NODE_4641_length_6971_cov_51.009613 mapping	2419	MNV	4	CAGT	TTTC	Homozygous	12	12	100	0.416667	34.5625	intergenic
NODE_4641_length_6971_cov_51.009613 mapping	2424	Insertion	1	-	T	Homozygous	12	12	100	0.416667	35.5	intergenic
NODE_4641_length_6971_cov_51.009613 mapping	2431	SNV	1	A	G	Homozygous	16	16	100	0.4375	38.125	intergenic
NODE_4641_length_6971_cov_51.009613 mapping	2439	SNV	1	T	G	Homozygous	16	16	100	0.4375	35.1875	intergenic
NODE_4641_length_6971_cov_51.009613 mapping	2465	SNV	1	G	A	Homozygous	11	11	100	0.363636	39.0909	intergenic
NODE_4641_length_6971_cov_51.009613 mapping	2467	SNV	1	A	G	Homozygous	11	11	100	0.363636	39	intergenic
NODE_4641_length_6971_cov_51.009613 mapping	2647	MNV	2	GC	AT	Homozygous	11	11	100	0.363636	38.7727	intergenic
NODE_4641_length_6971_cov_51.009613 mapping	2662	SNV	1	T	A	Homozygous	12	12	100	0.416667	38.5	intergenic
NODE_4641_length_6971_cov_51.009613 mapping	2672	SNV	1	C	T	Homozygous	12	12	100	0.416667	36.5833	intergenic
NODE_4641_length_6971_cov_51.009613 mapping	2687	SNV	1	A	C	Homozygous	12	12	100	0.5	37.8333	intergenic
NODE_4641_length_6971_cov_51.009613 mapping	2692	SNV	1	T	C	Heterozygous	7	12	58.3333	0.428571	38.1429	intergenic
NODE_4641_length_6971_cov_51.009613 mapping	2709	SNV	1	T	C	Heterozygous	3	10	30	0.333333	35	intergenic
NODE_4641_length_6971_cov_51.009613 mapping	2942	SNV	1	G	T	Homozygous	10	10	100	0.3	37.3	intergenic
NODE_4641_length_6971_cov_51.009613 mapping	2960	SNV	1	C	A	Homozygous	10	10	100	0.3	36	intergenic
NODE_4641_length_6971_cov_51.009613 mapping	2962	SNV	1	C	T	Heterozygous	6	10	60	0.166667	34.8333	intergenic
NODE_4641_length_6971_cov_51.009613 mapping	2982	SNV	1	A	G	Homozygous	10	10	100	0.4	31.8	intergenic
NODE_4641_length_6971_cov_51.009613 mapping	3138	MNV	2	CA	AT	Homozygous	11	11	100	0.272727	36.7273	intergenic
NODE_4641_length_6971_cov_51.009613 mapping	3158	SNV	1	A	T	Heterozygous	6	11	54.5455	0.333333	39.1667	intergenic
NODE_4641_length_6971_cov_51.009613 mapping	3158	SNV	1	A	C	Heterozygous	5	11	45.4545	0.4	36.6	intergenic
NODE_4641_length_6971_cov_51.009613 mapping	3510	Deletion	1	T	-	Heterozygous	6	13	46.1538	0.5	37.5	intergenic
NODE_4641_length_6971_cov_51.009613 mapping	3511	SNV	1	C	T	Heterozygous	4	10	40	0.5	38	intergenic
NODE_4641_length_6971_cov_51.009613 mapping	3513	MNV	2	GA	AG	Heterozygous	4	10	40	0.5	36.125	intergenic
NODE_4641_length_6971_cov_51.009613 mapping	3514	SNV	1	A	G	Heterozygous	6	10	60	0.5	39.1667	intergenic
NODE_4641_length_6971_cov_51.009613 mapping	3517	SNV	1	T	A	Heterozygous	4	11	36.3636	0.5	39.5	intergenic
NODE_4641_length_6971_cov_51.009613 mapping	3519	SNV	1	A	T	Homozygous	11	11	100	0.454545	37.7273	intergenic
NODE_4641_length_6971_cov_51.009613 mapping	3521	SNV	1	G	A	Homozygous	11	11	100	0.454545	36.7273	intergenic
NODE_4641_length_6971_cov_51.009613 mapping	3528	SNV	1	G	A	Heterozygous	7	14	50	0.428571	38	intergenic
NODE_4641_length_6971_cov_51.009613 mapping	3531	SNV	1	A	G	Heterozygous	7	15	46.6667	0.428571	38.2857	intergenic
NODE_4641_length_6971_cov_51.009613 mapping	3538	MNV	2	TT	AA	Heterozygous	5	15	33.3333	0.4	37.3	intergenic
NODE_4641_length_6971_cov_51.009613 mapping	3541	SNV	1	T	C	Heterozygous	7	15	46.6667	0.428571	39.7143	intergenic
NODE_4641_length_6971_cov_51.009613 mapping	3543	MNV	2	GG	TA	Heterozygous	5	15	33.3333	0.4	37.7	intergenic
NODE_4641_length_6971_cov_51.009613 mapping	3544	SNV	1	G	A	Heterozygous	3	15	20	0	33.8333	intergenic
NODE_4641_length_6971_cov_51.009613 mapping	3571	SNV	1	A	T	Heterozygous	11	17	64.7059	0.454545	34.6364	intergenic
NODE_4641_length_6971_cov_51.009613 mapping	3583	SNV	1	C	T	Heterozygous	6	19	31.5789	0.5	36.5	intergenic
NODE_4641_length_6971_cov_51.009613 mapping	3586	SNV	1	G	T	Heterozygous	10	18	55.5556	0.3	39	intergenic
NODE_4641_length_6971_cov_51.009613 mapping	3586	SNV	1	G	A	Heterozygous	8	18	44.4444	0.375	38.25	intergenic
NODE_4641_length_6971_cov_51.009613 mapping	3597	SNV	1	T	G	Heterozygous	10	15	66.6667	0.5	38	intergenic
NODE_4641_length_6971_cov_51.009613 mapping	3618	SNV	1	C	G	Homozygous	10	10	100	0.5	39.7	intergenic
NODE_4641_length_6971_cov_51.009613 mapping	3623	SNV	1	C	T	Homozygous	10	10	100	0.5	38.1	intergenic
NODE_4641_length_6971_cov_51.009613 mapping	3626	SNV	1	C	A	Heterozygous	7	10	70	0.428571	38.5714	intergenic
NODE_4641_length_6971_cov_51.009613 mapping	3628	SNV	1	G	A	Heterozygous	8	10	80	0.5	39.125	intergenic
NODE_4641_length_6971_cov_51.009613 mapping	3633	SNV	1	G	A	Heterozygous	8	12	66.6667	0.5	38	intergenic
NODE_4641_length_6971_cov_51.009613 mapping	3640	SNV	1	T	G	Homozygous	10	10	100	0.4	36.4	intergenic
NODE_4641_length_6971_cov_51.009613 mapping	3722	SNV	1	T	G	Homozygous	11	11	100	0.454545	37.0909	intergenic
NODE_4641_length_6971_cov_51.009613 mapping	3725	SNV	1	A	T	Heterozygous	7	11	63.6364	0.428571	37.5714	intergenic
NODE_4641_length_6971_cov_51.009613 mapping	3743	SNV	1	G	T	Heterozygous	4	11	36.3636	0.5	36.25	intergenic
NODE_4641_length_6971_cov_51.009613 mapping	3765	SNV	1	T	C	Heterozygous	8	13	61.5385	0.5	35.5	intergenic
NODE_4641_length_6971_cov_51.009613 mapping	3785	SNV	1	C	T	Heterozygous	4	13	30.7692	0.25	34	intergenic
NODE_4641_length_6971_cov_51.009613 mapping	3785	MNV	2	CC	TA	Heterozygous	9	13	69.2308	0.444444	36.4444	intergenic
NODE_4641_length_6971_cov_51.009613 mapping	3796	SNV	1	C	T	Heterozygous	6	10	60	0.166667	38.6667	intergenic
NODE_4641_length_6971_cov_51.009613 mapping	3799	SNV	1	A	G	Heterozygous	6	10	60	0.166667	39.6667	intergenic
NODE_4641_length_6971_cov_51.009613 mapping	4276	SNV	1	A	G	Homozygous	12	12	100	0.333333	38.5	intergenic
NODE_4641_length_6971_cov_51.009613 mapping	5676	SNV	1	C	T	Heterozygous	5	11	45.4545	0.333333	36.1667	intergenic
NODE_4641_length_6971_cov_51.009613 mapping	5679	SNV	1	G	A	Homozygous	11	11	100	0.5	33.8333	intergenic
NODE_4703_length_5697_cov_53.144989 mapping	912	SNV	1	G	A	Homozygous	9	10	90	0.222222	36.8889	intergenic
NODE_4703_length_5697_cov_53.144989 mapping	1676	Deletion	2	AC	-	Homozygous	11	11	100	0.454545	35.1818	intergenic
NODE_4703_length_5697_cov_53.144989 mapping	1715	SNV	1	A	T	Homozygous	11	11	100	0.363636	36.5455	intergenic
NODE_4432_length_13546_cov_44.793591 mapping	9052	Insertion	1	-	A	Homozygous	10	10	100	0.2	40.2	intergenic
NODE_4432_length_13546_cov_44.793591 mapping	9080	SNV	1	T	G	Homozygous	12	12	100	0.166667	38.5833	intergenic
NODE_4432_length_13546_cov_44.793591 mapping	9094	SNV	1	T	A	Homozygous	10	10	100	0.2	39.6	intergenic
NODE_4432_length_13546_cov_44.793591 mapping	9168	SNV	1	G	C	Homozygous	13	13	100	0.0769231	37	intergenic
NODE_4432_length_13546_cov_44.793591 mapping	9178	Replacement	4	T	AAAA	Homozygous	13	13	100	0.0769231	39.8269	intergenic
NODE_4432_length_13546_cov_44.793591 mapping	9199	MNV	2	AA	TT	Homozygous	14	14	100	0.285714	38.7857	intergenic
NODE_5011_length_1285_cov_45.652142 mapping	525	SNV	1	T	A	Homozygous	10	12	83.3333	0.1	39.2	intergenic
NODE_5011_length_1285_cov_45.652142 mapping	528	SNV	1	A	T	Homozygous	12	12	100	0.166667	39.0833	intergenic
NODE_5011_length_1285_cov_45.652142 mapping	552	SNV	1	C	T	Homozygous	12	12	100	0.0833333	39.0833	intergenic
NODE_4903_length_5931_cov_53.670208 mapping	1655	SNV	1	A	C	Homozygous	10	10	100	0.3	37.7	intergenic
NODE_4903_length_5931_cov_53.670208 mapping	1659	SNV	1	G	C	Heterozygous	3	10	30	0.333333	36.3333	intergenic
NODE_4903_length_5931_cov_53.670208 mapping	1661	SNV	1	G	A	Heterozygous	7	11	63.6364	0.142857	35.1429	intergenic
NODE_4903_length_5931_cov_53.670208 mapping	1666	SNV	1	A	C	Homozygous	11	11	100	0.363636	37	intergenic
NODE_4903_length_5931_cov_53.670208 mapping	1668	SNV	1	G	C	Heterozygous	4	11	36.3636	0.25	30.25	intergenic
NODE_4903_length_5931_cov_53.670208 mapping	1670	SNV	1	T	C	Heterozygous	4	11	36.3636	0.25	36.625	intergenic
NODE_4903_length_5931_cov_53.670208 mapping	1670	MNV	2	TG	CA	Heterozygous	7	11	63.6364	0.142857	38.2857	intergenic
NODE_4903_length_5931_cov_53.670208 mapping	1681	SNV	1	A	G	Heterozygous	4	12	33.3333	0.25	41	intergenic
NODE_4903_length_5931_cov_53.670208 mapping	1683	SNV	1	A	G	Heterozygous	5	12	41.6667	0.2	38	intergenic
NODE_4903_length_5931_cov_53.670208 mapping	1686	Insertion	1	-	T	Heterozygous	4	12	33.3333	0.25	40	intergenic
NODE_4903_length_5931_cov_53.670208 mapping	1691	SNV	1	G	T	Heterozygous	5	10	50	0.2	40.2	intergenic
NODE_4903_length_5931_cov_53.670208 mapping	1694	SNV	1	G	A	Heterozygous	4	10	40	0.25	36.5	intergenic
NODE_4903_length_5931_cov_53.670208 mapping	1744	SNV	1	C	T	Homozygous	6	11	54.5455	0.285714	36.5714	intergenic
NODE_5229_length_7675_cov_49.798565 mapping	5254	SNV	1	G	A	Homozygous	10	10	100	0.3	35.5	intron
NODE_5229_length_7675_cov_49.798565 mapping	5258	SNV	1	C	A	Homozygous	10	10	100	0.3	38.4	intron
NODE_5229_length_7675_cov_49.798565 mapping	5263	SNV	1	T	A	Homozygous	10	10	100	0.3	38.3	intron
NODE_5229_length_7675_cov_49.798565 mapping	5272	SNV	1	T	C	Heterozygous	8	11	72.7273	0.125	39.625	intron
NODE_5229_length_7675_cov_49.798565 mapping	5277	SNV	1	G	C	Homozygous	10	11	90.9091	0.3	38	intron
NODE_5229_length_7675_cov_49.798565 mapping	5279	SNV	1	C	T	Heterozygous	3	11	27.2727	0.333333	40.6667	intron
NODE_5229_length_7675_cov_49.798565 mapping	5279	MNV	2	CT	TC	Heterozygous	8	11	72.7273	0.125	37.6	intron
NODE_5229_length_7675_cov_49.798565 mapping	5302	SNV	1	C	T	Homozygous	10	10	100	0.3	38.5	intron
NODE_5229_length_7675_cov_49.798565 mapping	5332	SNV	1	A	T	Homozygous	10	10	100	0.4	34.6	intron
NODE_5229_length_7675_cov_49.798565 mapping	5414	SNV	1	C	A	Homozygous	10	10	100	0.1	36.8	intron
NODE_5229_length_7675_cov_49.798565 mapping	5440	SNV	1	T	A	Homozygous	10	10	100	0.1	36.1	intron
NODE_5229_length_7675_cov_49.798565 mapping	5448	SNV	1	C	T	Homozygous	10	10	100	0.1	36.4	intron
NODE_5086_length_5684_cov_59.078995 mapping	3482	SNV	1	G	A	Homozygous	10	10	100	0.3	37.2	intergenic
NODE_5086_length_5684_cov_59.078995 mapping	3485	SNV	1	T	C	Homozygous	10	10	100	0.3	37	intergenic
NODE_5086_length_5684_cov_59.078995 mapping	3489	Deletion	1	A	-	Homozygous	7	10	70	0.428571	37.4286	intergenic
NODE_5486_length_4341_cov_56.746834 mapping	2199	SNV	1	A	T	Homozygous	10	10	100	0.4	39.3	intergenic
NODE_5486_length_4341_cov_56.746834 mapping	2202	SNV	1	G	A	Homozygous	10	10	100	0.4	38.6	intergenic
NODE_5486_length_4341_cov_56.746834 mapping	2381	Deletion	1	C	-	Homozygous	10	11	90.9091	0.4	36.8	intergenic
NODE_5580_length_1263_cov_66.696754 mapping	828	SNV	1	T	C	Homozygous	12	12	100	0.416667	36.8333	exon
NODE_5580_length_1263_cov_66.696754 mapping	870	SNV	1	C	T	Homozygous	11	11	100	0.363636	35.7273	exon
NODE_5645_length_14157_cov_52.856678 mapping	5767	SNV	1	A	G	Heterozygous	6	10	60	0.333333	39.1667	intergenic
NODE_5645_length_14157_cov_52.856678 mapping	5848	Deletion	4	ATCT	-	Heterozygous	4	11	36.3636	0.25	37.75	intergenic
NODE_5645_length_14157_cov_52.856678 mapping	5880	Insertion	1	-	A	Heterozygous	6	10	60	0.5	40.6667	intergenic
NODE_5645_length_14157_cov_52.856678 mapping	5911	SNV	1	A	T	Homozygous	14	14	100	0.5	38.4286	intergenic
NODE_5645_length_14157_cov_52.856678 mapping	5924	SNV	1	T	A	Homozygous	12	12	100	0.416667	39.6667	intergenic
NODE_5645_length_14157_cov_52.856678 mapping	5932	SNV	1	G	A	Heterozygous	4	10	40	0.5	39.75	intergenic
NODE_5645_length_14157_cov_52.856678 mapping	10669	SNV	1	A	G	Heterozygous	3	11	27.2727	0.333333	35.3333	intergenic
NODE_5645_length_14157_cov_52.856678 mapping	10711	SNV	1	A	T	Heterozygous	3	10	30	0.333333	37.6667	intergenic
NODE_5645_length_14157_cov_52.856678 mapping	10803	SNV	1	A	C	Homozygous	7	10	70	0.142857	35.8571	intergenic
NODE_5745_length_3577_cov_75.123566 mapping	2800	SNV	1	T	C	Heterozygous	4	10	40	0.25	40.25	intergenic
NODE_5745_length_3577_cov_75.123566 mapping	2817	SNV	1	C	T	Heterozygous	7	11	63.6364	0.285714	39	intergenic
NODE_5745_length_3577_cov_75.123566 mapping	2838	SNV	1	A	G	Homozygous	6	10	60	0.333333	37.5	intergenic
NODE_5745_length_3577_cov_75.123566 mapping	3268	SNV	1	A	G	Heterozygous	7	10	70	0.428571	39.7143	exon
NODE_5745_length_3577_cov_75.123566 mapping	3273	SNV	1	A	C	Heterozygous	7	10	70	0.428571	40.5714	exon
NODE_5745_length_3577_cov_75.123566 mapping	3276	SNV	1	C	A	Heterozygous	7	10	70	0.428571	39.8571	exon
NODE_5745_length_3577_cov_75.123566 mapping	3278	SNV	1	T	A	Heterozygous	7	10	70	0.428571	39.7143	exon
NODE_5745_length_3577_cov_75.123566 mapping	3293	SNV	1	T	C	Heterozygous	7	10	70	0.428571	39	exon
NODE_5745_length_3577_cov_75.123566 mapping	3296	SNV	1	T	C	Homozygous	10	10	100	0.5	39.9	exon
NODE_5745_length_3577_cov_75.123566 mapping	3298	SNV	1	A	G	Heterozygous	3	10	30	0.333333	40.3333	exon
NODE_5745_length_3577_cov_75.123566 mapping	3308	SNV	1	G	A	Heterozygous	3	10	30	0.333333	40.6667	exon
NODE_5855_length_2464_cov_73.993507 mapping	373	SNV	1	A	T	Homozygous	5	14	35.7143	0.2	38.4	intron
NODE_5855_length_2464_cov_73.993507 mapping	403	SNV	1	T	C	Heterozygous	11	28	39.2857	0.272727	38.3636	intron
NODE_5855_length_2464_cov_73.993507 mapping	425	SNV	1	C	T	Heterozygous	12	29	41.3793	0.5	37.25	intron
NODE_5855_length_2464_cov_73.993507 mapping	437	SNV	1	T	A	Heterozygous	10	29	34.4828	0.3	40.2	intron
NODE_5855_length_2464_cov_73.993507 mapping	467	Insertion	1	-	C	Heterozygous	11	37	29.7297	0.272727	39.5455	intron
NODE_5855_length_2464_cov_73.993507 mapping	470	SNV	1	A	T	Heterozygous	23	33	69.697	0.434783	36.4783	intron
NODE_5855_length_2464_cov_73.993507 mapping	470	Deletion	1	A	-	Heterozygous	10	33	30.303	0.3	38.7	intron
NODE_5855_length_2464_cov_73.993507 mapping	478	SNV	1	T	C	Heterozygous	10	35	28.5714	0.3	38.5	intron
NODE_5855_length_2464_cov_73.993507 mapping	489	Insertion	1	-	T	Heterozygous	14	33	42.4242	0.428571	39.2143	intron
NODE_5855_length_2464_cov_73.993507 mapping	492	Insertion	1	-	G	Heterozygous	10	32	31.25	0.5	36.3	intron
NODE_5855_length_2464_cov_73.993507 mapping	505	SNV	1	T	C	Heterozygous	21	33	63.6364	0.380952	37.1429	intron
NODE_5855_length_2464_cov_73.993507 mapping	518	SNV	1	G	A	Homozygous	34	34	100	0.441176	38.3235	intron
NODE_5855_length_2464_cov_73.993507 mapping	537	SNV	1	C	T	Homozygous	35	36	97.2222	0.457143	34.6571	intron
NODE_5855_length_2464_cov_73.993507 mapping	550	SNV	1	C	A	Homozygous	33	34	97.0588	0.411765	32.1471	intron
NODE_5855_length_2464_cov_73.993507 mapping	596	SNV	1	A	G	Homozygous	22	22	100	0.363636	38.5	intron
NODE_5855_length_2464_cov_73.993507 mapping	601	Replacement	2	TG	C	Homozygous	22	22	100	0.363636	36	intron
NODE_5855_length_2464_cov_73.993507 mapping	629	SNV	1	T	A	Heterozygous	4	15	26.6667	0.25	40.25	intron
NODE_5855_length_2464_cov_73.993507 mapping	644	SNV	1	G	A	Homozygous	12	13	92.3077	0.25	37.1667	intron
NODE_5855_length_2464_cov_73.993507 mapping	663	SNV	1	A	T	Homozygous	15	15	100	0.266667	36.1333	intron
NODE_5855_length_2464_cov_73.993507 mapping	688	SNV	1	A	G	Heterozygous	16	23	69.5652	0.1875	36.8125	intron
NODE_5855_length_2464_cov_73.993507 mapping	696	SNV	1	G	A	Homozygous	23	23	100	0.26087	37.3043	intron
NODE_5855_length_2464_cov_73.993507 mapping	710	SNV	1	A	G	Heterozygous	5	21	23.8095	0.4	32.4	intron
NODE_5855_length_2464_cov_73.993507 mapping	719	SNV	1	G	T	Homozygous	16	19	84.2105	0.1875	39.1875	intron
NODE_5855_length_2464_cov_73.993507 mapping	723	SNV	1	G	A	Homozygous	18	18	100	0.166667	38.5	intron
NODE_5855_length_2464_cov_73.993507 mapping	728	SNV	1	A	T	Homozygous	18	18	100	0.166667	40.2222	intron
NODE_5855_length_2464_cov_73.993507 mapping	746	Deletion	2	TT	-	Heterozygous	7	12	58.3333	0.142857	36.4286	intron
NODE_5855_length_2464_cov_73.993507 mapping	862	SNV	1	A	G	Heterozygous	3	10	30	0.333333	39.6667	intron
NODE_5855_length_2464_cov_73.993507 mapping	873	Replacement	2	A	CT	Homozygous	11	11	100	0.363636	39.9091	intron
NODE_5855_length_2464_cov_73.993507 mapping	875	Insertion	1	-	A	Homozygous	10	11	90.9091	0.4	40.6	intron
NODE_5855_length_2464_cov_73.993507 mapping	885	SNV	1	C	A	Homozygous	15	15	100	0.266667	39	intron
NODE_5855_length_2464_cov_73.993507 mapping	900	SNV	1	C	A	Heterozygous	6	17	35.2941	0.333333	39.1667	intron
NODE_5855_length_2464_cov_73.993507 mapping	925	SNV	1	A	G	Homozygous	10	10	100	0.1	38.2	exon
NODE_5855_length_2464_cov_73.993507 mapping	928	SNV	1	A	G	Homozygous	10	10	100	0.1	38.2	exon
NODE_5855_length_2464_cov_73.993507 mapping	952	SNV	1	C	A	Homozygous	10	10	100	0.3	36.7	exon
NODE_5855_length_2464_cov_73.993507 mapping	954	SNV	1	C	T	Heterozygous	7	11	63.6364	0.285714	31.9231	exon
NODE_5855_length_2464_cov_73.993507 mapping	954	MNV	2	CG	TT	Heterozygous	4	11	36.3636	0.25	35.625	exon
NODE_5855_length_2464_cov_73.993507 mapping	993	SNV	1	G	T	Homozygous	17	17	100	0.352941	37.1176	exon
NODE_5855_length_2464_cov_73.993507 mapping	1087	SNV	1	G	A	Heterozygous	8	28	28.5714	0.5	36.5	exon
NODE_5855_length_2464_cov_73.993507 mapping	1091	SNV	1	T	A	Homozygous	25	25	100	0.44	37.48	exon
NODE_5855_length_2464_cov_73.993507 mapping	1125	SNV	1	T	C	Heterozygous	9	17	52.9412	0.222222	38.2222	exon
NODE_5855_length_2464_cov_73.993507 mapping	1125	SNV	1	T	A	Heterozygous	8	17	47.0588	0.5	37.875	exon
NODE_5855_length_2464_cov_73.993507 mapping	1137	MNV	2	AA	TG	Heterozygous	6	16	37.5	0.333333	39.3333	exon
NODE_5855_length_2464_cov_73.993507 mapping	1138	SNV	1	A	G	Heterozygous	10	16	62.5	0.2	38.95	exon
NODE_5855_length_2464_cov_73.993507 mapping	1145	SNV	1	A	G	Homozygous	16	16	100	0.375	38.6875	exon
NODE_5855_length_2464_cov_73.993507 mapping	1198	SNV	1	A	T	Heterozygous	3	10	30	0.333333	38.3333	exon
NODE_5855_length_2464_cov_73.993507 mapping	1228	SNV	1	G	A	Heterozygous	5	15	33.3333	0.2	38.8	exon
NODE_5855_length_2464_cov_73.993507 mapping	1234	SNV	1	G	A	Heterozygous	12	16	75	0.5	39	exon
NODE_5855_length_2464_cov_73.993507 mapping	1234	MNV	2	GT	AC	Heterozygous	4	16	25	0.5	40.375	exon
NODE_5855_length_2464_cov_73.993507 mapping	1282	SNV	1	C	T	Homozygous	21	21	100	0.47619	38.7143	exon
NODE_5855_length_2464_cov_73.993507 mapping	1322	SNV	1	C	T	Homozygous	19	19	100	0.473684	39.2105	intron
NODE_5855_length_2464_cov_73.993507 mapping	1332	SNV	1	G	A	Homozygous	20	20	100	0.45	38	intron
NODE_5855_length_2464_cov_73.993507 mapping	1367	SNV	1	T	G	Homozygous	16	17	94.1176	0.5	36.1875	intron
NODE_5855_length_2464_cov_73.993507 mapping	1386	SNV	1	C	A	Homozygous	19	19	100	0.368421	37.1053	intron
NODE_5855_length_2464_cov_73.993507 mapping	1438	SNV	1	T	C	Homozygous	19	20	95	0.368421	39.1579	exon
NODE_5855_length_2464_cov_73.993507 mapping	1451	SNV	1	G	A	Homozygous	19	19	100	0.368421	37.0526	exon
NODE_5855_length_2464_cov_73.993507 mapping	1456	SNV	1	G	T	Homozygous	21	21	100	0.47619	38.1905	exon
NODE_5855_length_2464_cov_73.993507 mapping	1485	SNV	1	A	G	Heterozygous	10	21	47.619	0.272727	37	intron
NODE_5855_length_2464_cov_73.993507 mapping	1487	SNV	1	T	A	Homozygous	20	20	100	0.47619	38.4762	intron
NODE_5855_length_2464_cov_73.993507 mapping	1491	SNV	1	G	A	Homozygous	19	19	100	0.5	39.6	intron
NODE_5855_length_2464_cov_73.993507 mapping	1505	SNV	1	G	A	Homozygous	22	22	100	0.454545	39.0909	intron
NODE_5855_length_2464_cov_73.993507 mapping	1521	SNV	1	G	T	Homozygous	19	19	100	0.421053	37.1579	intron
NODE_5855_length_2464_cov_73.993507 mapping	1527	SNV	1	C	T	Homozygous	16	16	100	0.4375	38.3125	intron
NODE_5855_length_2464_cov_73.993507 mapping	1531	SNV	1	T	C	Homozygous	15	15	100	0.466667	38.0667	intron
NODE_5855_length_2464_cov_73.993507 mapping	1534	Deletion	1	A	-	Heterozygous	4	15	26.6667	0.5	40	intron
NODE_5855_length_2464_cov_73.993507 mapping	1536	SNV	1	A	G	Homozygous	15	15	100	0.466667	38.4	intron
NODE_5855_length_2464_cov_73.993507 mapping	1553	SNV	1	T	A	Homozygous	10	10	100	0.4	39.8	intron
NODE_5855_length_2464_cov_73.993507 mapping	1557	SNV	1	T	G	Heterozygous	6	10	60	0.5	38.1667	intron
NODE_5855_length_2464_cov_73.993507 mapping	1557	Replacement	2	TT	A	Heterozygous	4	10	40	0.25	37.625	intron
NODE_5855_length_2464_cov_73.993507 mapping	1631	Deletion	1	T	-	Homozygous	8	10	80	0.125	39.5	exon
NODE_5855_length_2464_cov_73.993507 mapping	1636	SNV	1	T	A	Homozygous	7	13	53.8462	0.142857	36	exon
NODE_5855_length_2464_cov_73.993507 mapping	1694	SNV	1	A	G	Homozygous	12	12	100	0.0833333	39.25	exon
NODE_5855_length_2464_cov_73.993507 mapping	1704	SNV	1	A	G	Homozygous	11	11	100	0.0909091	40.0909	exon
NODE_5855_length_2464_cov_73.993507 mapping	1708	Insertion	1	-	A	Homozygous	10	11	90.9091	0.1	40.1	exon
NODE_5855_length_2464_cov_73.993507 mapping	1710	SNV	1	G	A	Homozygous	11	11	100	0.0909091	38.1818	exon
NODE_5855_length_2464_cov_73.993507 mapping	1716	SNV	1	T	C	Homozygous	10	11	90.9091	0.1	39.7	exon
NODE_5760_length_10819_cov_47.218410 mapping	9379	MNV	2	TG	CA	Homozygous	11	11	100	0.363636	36.4091	intergenic
NODE_5760_length_10819_cov_47.218410 mapping	9384	SNV	1	C	T	Homozygous	11	11	100	0.363636	37	intergenic
NODE_5760_length_10819_cov_47.218410 mapping	9412	SNV	1	G	A	Homozygous	12	12	100	0.333333	38.75	intergenic
NODE_3353_length_50984_cov_34.709713 mapping	3590	SNV	1	G	A	Homozygous	11	11	100	0.181818	38.7273	intron
NODE_3353_length_50984_cov_34.709713 mapping	3605	SNV	1	T	G	Homozygous	11	11	100	0.181818	37.4545	intron
NODE_3353_length_50984_cov_34.709713 mapping	3614	SNV	1	G	T	Homozygous	10	10	100	0.2	36.7	intron
NODE_3353_length_50984_cov_34.709713 mapping	11831	SNV	1	T	C	Homozygous	10	10	100	0.4	38.8	intron
NODE_3353_length_50984_cov_34.709713 mapping	11835	SNV	1	C	A	Homozygous	10	10	100	0.4	38.1	intron
NODE_3353_length_50984_cov_34.709713 mapping	11868	SNV	1	C	A	Homozygous	10	10	100	0.4	38.5	intron
NODE_3353_length_50984_cov_34.709713 mapping	11872	SNV	1	G	A	Homozygous	10	10	100	0.4	38.3	intron
NODE_3353_length_50984_cov_34.709713 mapping	12548	SNV	1	C	A	Homozygous	10	10	100	0.3	39.1	intron
NODE_3353_length_50984_cov_34.709713 mapping	12552	SNV	1	T	C	Homozygous	10	10	100	0.3	38.8	intron
NODE_3353_length_50984_cov_34.709713 mapping	12567	SNV	1	T	A	Homozygous	10	10	100	0.3	37.8	intron
NODE_3353_length_50984_cov_34.709713 mapping	12609	Insertion	1	-	T	Homozygous	8	10	80	0.25	37.875	intron
NODE_3353_length_50984_cov_34.709713 mapping	12755	SNV	1	A	T	Homozygous	11	11	100	0.454545	40	intron
NODE_3353_length_50984_cov_34.709713 mapping	12916	SNV	1	T	G	Homozygous	10	10	100	0.4	38.4	intron
NODE_3353_length_50984_cov_34.709713 mapping	13352	SNV	1	T	A	Homozygous	10	10	100	0.4	36.9	intron
NODE_3353_length_50984_cov_34.709713 mapping	13695	SNV	1	A	T	Homozygous	10	10	100	0.2	36.5	intron
NODE_3353_length_50984_cov_34.709713 mapping	13717	SNV	1	T	A	Homozygous	10	10	100	0.2	36.3	intron
NODE_3353_length_50984_cov_34.709713 mapping	20406	SNV	1	G	T	Homozygous	15	15	100	0.333333	36	intron
NODE_3353_length_50984_cov_34.709713 mapping	20430	SNV	1	A	C	Homozygous	17	17	100	0.411765	36.5882	intron
NODE_3353_length_50984_cov_34.709713 mapping	20437	SNV	1	G	A	Homozygous	14	15	93.3333	0.5	33.5714	intron
NODE_3353_length_50984_cov_34.709713 mapping	20453	SNV	1	C	G	Homozygous	11	11	100	0.363636	37.3636	intron
NODE_3353_length_50984_cov_34.709713 mapping	20560	SNV	1	C	A	Homozygous	10	10	100	0.2	37.6	intron
NODE_3353_length_50984_cov_34.709713 mapping	20573	SNV	1	C	A	Homozygous	14	14	100	0.285714	36.7857	intron
NODE_3353_length_50984_cov_34.709713 mapping	20588	Deletion	2	TA	-	Homozygous	15	15	100	0.4	37.8667	intron
NODE_3353_length_50984_cov_34.709713 mapping	20599	SNV	1	C	T	Homozygous	17	17	100	0.411765	37.8824	intron
NODE_3353_length_50984_cov_34.709713 mapping	20619	SNV	1	T	A	Heterozygous	9	16	56.25	0.333333	39.4444	intron
NODE_3353_length_50984_cov_34.709713 mapping	20623	SNV	1	G	C	Homozygous	16	16	100	0.4375	38.8125	intron
NODE_3353_length_50984_cov_34.709713 mapping	20845	SNV	1	C	T	Homozygous	11	11	100	0.363636	35.5455	intron
NODE_3353_length_50984_cov_34.709713 mapping	20884	SNV	1	A	T	Heterozygous	7	15	46.6667	0.428571	36.2857	intron
NODE_3353_length_50984_cov_34.709713 mapping	20896	MNV	2	CC	TT	Homozygous	14	14	100	0.285714	38.6429	intron
NODE_3353_length_50984_cov_34.709713 mapping	20899	SNV	1	T	C	Homozygous	14	14	100	0.285714	38.2143	intron
NODE_3353_length_50984_cov_34.709713 mapping	20906	Deletion	1	T	-	Homozygous	15	15	100	0.333333	35.7333	intron
NODE_3353_length_50984_cov_34.709713 mapping	20924	SNV	1	C	G	Heterozygous	9	16	56.25	0.333333	37.1111	intron
NODE_3353_length_50984_cov_34.709713 mapping	20926	SNV	1	T	C	Homozygous	15	15	100	0.4	36.6	intron
NODE_3353_length_50984_cov_34.709713 mapping	20941	SNV	1	T	G	Homozygous	11	12	91.6667	0.454545	38.4545	intron
NODE_3353_length_50984_cov_34.709713 mapping	21015	SNV	1	T	A	Homozygous	13	13	100	0.461538	39.1538	intron
NODE_3353_length_50984_cov_34.709713 mapping	21020	SNV	1	C	T	Homozygous	15	15	100	0.466667	39.4	intron
NODE_3353_length_50984_cov_34.709713 mapping	21044	SNV	1	T	G	Homozygous	17	17	100	0.5	37.3333	intron
NODE_3353_length_50984_cov_34.709713 mapping	21050	SNV	1	T	C	Homozygous	18	18	100	0.473684	35.5789	intron
NODE_3353_length_50984_cov_34.709713 mapping	21055	SNV	1	T	A	Homozygous	16	16	100	0.470588	36	intron
NODE_3353_length_50984_cov_34.709713 mapping	21057	SNV	1	C	T	Homozygous	16	16	100	0.470588	36.2941	intron
NODE_3353_length_50984_cov_34.709713 mapping	21096	SNV	1	C	T	Homozygous	16	16	100	0.5	37.9375	intron
NODE_3353_length_50984_cov_34.709713 mapping	21117	Insertion	1	-	T	Homozygous	14	14	100	0.357143	37.5	intron
NODE_3353_length_50984_cov_34.709713 mapping	21132	MNV	2	CG	AT	Heterozygous	6	12	50	0.333333	39.5	intron
NODE_3353_length_50984_cov_34.709713 mapping	21133	SNV	1	G	T	Heterozygous	6	12	50	0.5	38.8333	intron
NODE_3353_length_50984_cov_34.709713 mapping	21174	SNV	1	G	C	Homozygous	14	14	100	0.285714	38.5714	intron
NODE_3353_length_50984_cov_34.709713 mapping	21186	SNV	1	A	C	Homozygous	13	14	92.8571	0.307692	40.1538	intron
NODE_3353_length_50984_cov_34.709713 mapping	21244	SNV	1	C	T	Homozygous	19	19	100	0.315789	37.1579	intron
NODE_3353_length_50984_cov_34.709713 mapping	21247	SNV	1	A	T	Homozygous	19	19	100	0.315789	37.5789	intron
NODE_3353_length_50984_cov_34.709713 mapping	21264	SNV	1	C	A	Homozygous	14	14	100	0.214286	37.8571	intron
NODE_3353_length_50984_cov_34.709713 mapping	21279	SNV	1	A	T	Homozygous	12	12	100	0.0833333	39.3333	intron
NODE_3353_length_50984_cov_34.709713 mapping	21290	SNV	1	T	A	Homozygous	9	10	90	0.111111	37.7778	intron
NODE_3353_length_50984_cov_34.709713 mapping	26644	SNV	1	A	T	Homozygous	12	12	100	0.416667	38.9167	intron
NODE_3353_length_50984_cov_34.709713 mapping	26648	SNV	1	T	G	Homozygous	12	12	100	0.416667	39.4167	intron
NODE_3353_length_50984_cov_34.709713 mapping	26656	SNV	1	A	G	Homozygous	11	11	100	0.363636	38.8182	intron
NODE_5998_length_1250_cov_68.321602 mapping	498	SNV	1	A	G	Homozygous	10	10	100	0.4	39.2	exon
NODE_5170_length_20460_cov_28.448484 mapping	18313	SNV	1	A	G	Homozygous	10	11	90.9091	0.3	37.9	intergenic
NODE_5170_length_20460_cov_28.448484 mapping	18317	SNV	1	G	A	Homozygous	11	11	100	0.272727	38.9091	intergenic
NODE_5170_length_20460_cov_28.448484 mapping	18333	SNV	1	C	A	Homozygous	11	11	100	0.272727	40.0909	intergenic
NODE_5170_length_20460_cov_28.448484 mapping	18339	SNV	1	A	T	Homozygous	11	11	100	0.272727	39.9091	intergenic
NODE_5170_length_20460_cov_28.448484 mapping	18355	SNV	1	A	T	Homozygous	14	14	100	0.285714	39	intergenic
NODE_5170_length_20460_cov_28.448484 mapping	18358	SNV	1	A	G	Homozygous	13	14	92.8571	0.307692	38.6923	intergenic
NODE_5170_length_20460_cov_28.448484 mapping	18364	SNV	1	A	T	Homozygous	14	14	100	0.285714	38.9286	intergenic
NODE_5170_length_20460_cov_28.448484 mapping	18369	MNV	2	CA	TG	Homozygous	13	13	100	0.307692	38.1538	intergenic
NODE_5170_length_20460_cov_28.448484 mapping	18382	Insertion	3	-	GTT	Homozygous	9	9	100	0.222222	39.2593	intergenic
NODE_5170_length_20460_cov_28.448484 mapping	18525	SNV	1	A	G	Homozygous	13	13	100	0.384615	37.8462	intergenic
NODE_5170_length_20460_cov_28.448484 mapping	18534	SNV	1	G	T	Homozygous	15	15	100	0.333333	38.3333	intergenic
NODE_5170_length_20460_cov_28.448484 mapping	18537	SNV	1	C	T	Homozygous	15	15	100	0.333333	39.2	intergenic
NODE_5170_length_20460_cov_28.448484 mapping	18540	SNV	1	C	A	Homozygous	15	15	100	0.333333	39.3333	intergenic
NODE_5170_length_20460_cov_28.448484 mapping	18550	Insertion	1	-	T	Homozygous	13	14	92.8571	0.384615	38.6923	intergenic
NODE_5170_length_20460_cov_28.448484 mapping	18569	SNV	1	T	C	Homozygous	11	13	84.6154	0.454545	39.4545	intergenic
NODE_5170_length_20460_cov_28.448484 mapping	18576	SNV	1	A	G	Homozygous	12	12	100	0.416667	39	intergenic
NODE_5170_length_20460_cov_28.448484 mapping	18722	Insertion	2	-	AT	Homozygous	10	10	100	0.4	38	intergenic
NODE_5170_length_20460_cov_28.448484 mapping	18732	MNV	2	GA	AT	Homozygous	11	11	100	0.454545	38	intergenic
NODE_5170_length_20460_cov_28.448484 mapping	18781	SNV	1	T	A	Homozygous	10	10	100	0.3	38.1	intergenic
NODE_5170_length_20460_cov_28.448484 mapping	18787	Insertion	3	-	TAT	Heterozygous	8	10	80	0.25	37.5833	intergenic
NODE_5170_length_20460_cov_28.448484 mapping	19011	SNV	1	C	A	Homozygous	11	11	100	0.181818	37.1818	intergenic
NODE_5170_length_20460_cov_28.448484 mapping	19037	SNV	1	T	A	Homozygous	10	10	100	0.2	37.7	intergenic
NODE_6170_length_3563_cov_57.931236 mapping	2115	SNV	1	C	T	Homozygous	10	10	100	0.5	39.1	intergenic
NODE_6170_length_3563_cov_57.931236 mapping	2162	SNV	1	T	C	Homozygous	11	11	100	0.363636	39.2727	intergenic
NODE_6170_length_3563_cov_57.931236 mapping	2177	MNV	2	CT	TC	Homozygous	12	12	100	0.333333	38.0417	intergenic
NODE_6170_length_3563_cov_57.931236 mapping	2188	SNV	1	A	T	Homozygous	11	11	100	0.272727	38.1818	intergenic
NODE_6170_length_3563_cov_57.931236 mapping	2190	Deletion	1	T	-	Heterozygous	6	11	54.5455	0.166667	38.6667	intergenic
NODE_6202_length_58492_cov_18.909748 mapping	30234	SNV	1	A	G	Homozygous	9	10	90	0.5	36.5	exon
NODE_6272_length_6486_cov_6.070305 mapping	267	SNV	1	T	C	Homozygous	10	10	100	0.5	37.6	intergenic
NODE_6272_length_6486_cov_6.070305 mapping	276	SNV	1	C	T	Heterozygous	6	11	54.5455	0.166667	35.8333	intergenic
NODE_6272_length_6486_cov_6.070305 mapping	279	SNV	1	T	A	Heterozygous	6	11	54.5455	0.166667	36.8333	intergenic
NODE_6272_length_6486_cov_6.070305 mapping	302	Deletion	1	T	-	Heterozygous	5	13	38.4615	0.4	37.8	intergenic
NODE_6272_length_6486_cov_6.070305 mapping	315	SNV	1	C	T	Homozygous	12	12	100	0.416667	37.25	intergenic
NODE_6272_length_6486_cov_6.070305 mapping	427	SNV	1	G	T	Heterozygous	8	15	53.3333	0.375	36.25	intergenic
NODE_6272_length_6486_cov_6.070305 mapping	444	Deletion	3	TCG	-	Heterozygous	11	14	78.5714	0.454545	37.5455	intergenic
NODE_6272_length_6486_cov_6.070305 mapping	446	Deletion	1	G	-	Heterozygous	3	14	21.4286	0.333333	35.125	intergenic
NODE_6272_length_6486_cov_6.070305 mapping	452	Deletion	1	T	-	Homozygous	14	14	100	0.428571	35.2143	intergenic
NODE_6272_length_6486_cov_6.070305 mapping	480	SNV	1	T	G	Homozygous	15	15	100	0.466667	38.3333	intergenic
NODE_6272_length_6486_cov_6.070305 mapping	496	MNV	2	CC	TT	Heterozygous	6	16	37.5	0.333333	39.5	intergenic
NODE_6272_length_6486_cov_6.070305 mapping	497	SNV	1	C	T	Heterozygous	10	16	62.5	0.4	36.7895	intergenic
NODE_6272_length_6486_cov_6.070305 mapping	501	SNV	1	T	G	Heterozygous	5	15	33.3333	0.4	37.8	intergenic
NODE_6272_length_6486_cov_6.070305 mapping	519	SNV	1	G	A	Heterozygous	5	10	50	0.4	37.2	intergenic
NODE_6272_length_6486_cov_6.070305 mapping	522	SNV	1	G	T	Homozygous	10	10	100	0.4	37.3	intergenic
NODE_6282_length_2341_cov_52.962410 mapping	2080	SNV	1	A	C	Homozygous	11	11	100	0.181818	37.3636	exon
NODE_6282_length_2341_cov_52.962410 mapping	2093	SNV	1	G	A	Homozygous	11	11	100	0.181818	35.5455	exon
NODE_6305_length_1081_cov_3142.388428 mapping	130	Insertion	7	-	TTTCAAT	Heterozygous	45	95	47.3684	0.0666667	33.4032	exon
NODE_6305_length_1081_cov_3142.388428 mapping	279	SNV	1	C	A	Homozygous	226	226	100	0.460177	36.5088	exon
NODE_6305_length_1081_cov_3142.388428 mapping	296	SNV	1	T	G	Homozygous	230	238	96.6387	0.413043	36.1217	exon
NODE_6305_length_1081_cov_3142.388428 mapping	554	MNV	2	GA	TC	Homozygous	253	253	100	0.494071	36.8893	intergenic
NODE_6305_length_1081_cov_3142.388428 mapping	747	SNV	1	A	C	Homozygous	244	245	99.5918	0.479508	37.7541	exon
NODE_6305_length_1081_cov_3142.388428 mapping	895	SNV	1	T	C	Homozygous	202	205	98.5366	0.394089	35.0049	exon
NODE_6374_length_19556_cov_40.786304 mapping	8855	SNV	1	G	T	Homozygous	10	10	100	0.4	39.5	intron
NODE_4358_length_24116_cov_7.401062 mapping	20094	SNV	1	C	A	Homozygous	10	10	100	0.2	38.2	intron
NODE_4358_length_24116_cov_7.401062 mapping	20112	SNV	1	G	T	Homozygous	11	11	100	0.181818	38.7273	intron
NODE_4358_length_24116_cov_7.401062 mapping	20133	SNV	1	C	A	Homozygous	13	13	100	0.307692	37.0769	intron
NODE_4358_length_24116_cov_7.401062 mapping	20138	SNV	1	C	A	Homozygous	14	14	100	0.285714	38	intron
NODE_4358_length_24116_cov_7.401062 mapping	20140	SNV	1	G	C	Homozygous	13	14	92.8571	0.307692	39.3846	intron
NODE_4358_length_24116_cov_7.401062 mapping	20196	MNV	2	AT	TA	Homozygous	15	15	100	0.466667	34.8333	intron
NODE_4358_length_24116_cov_7.401062 mapping	20277	SNV	1	A	G	Homozygous	12	12	100	0.5	37.9167	intron
NODE_4358_length_24116_cov_7.401062 mapping	20308	SNV	1	G	A	Heterozygous	8	11	72.7273	0.5	37.625	exon
NODE_4358_length_24116_cov_7.401062 mapping	20325	SNV	1	G	T	Homozygous	14	14	100	0.357143	35.7143	exon
NODE_6530_length_6317_cov_51.148964 mapping	3069	SNV	1	C	A	Homozygous	11	11	100	0.454545	37.2727	intergenic
NODE_6530_length_6317_cov_51.148964 mapping	3077	SNV	1	G	T	Homozygous	11	11	100	0.454545	35.6364	intergenic
NODE_6530_length_6317_cov_51.148964 mapping	3086	MNV	2	GC	AT	Homozygous	11	11	100	0.454545	37.2727	intergenic
NODE_6530_length_6317_cov_51.148964 mapping	3120	MNV	2	AA	GG	Homozygous	12	12	100	0.416667	38.2083	intergenic
NODE_6530_length_6317_cov_51.148964 mapping	3148	SNV	1	A	G	Homozygous	11	11	100	0.363636	36.2727	intergenic
NODE_6530_length_6317_cov_51.148964 mapping	3156	SNV	1	A	G	Heterozygous	4	10	40	0.5	33.5	intergenic
NODE_6545_length_21072_cov_36.064541 mapping	11699	SNV	1	G	T	Homozygous	6	10	60	0.166667	38.3333	intron
NODE_6545_length_21072_cov_36.064541 mapping	11702	SNV	1	G	A	Homozygous	10	10	100	0.1	38.1	intron
NODE_6545_length_21072_cov_36.064541 mapping	11730	Deletion	1	A	-	Homozygous	7	11	63.6364	0.285714	35.5714	intron
NODE_6545_length_21072_cov_36.064541 mapping	11898	SNV	1	A	G	Heterozygous	6	11	54.5455	0.5	35.1667	intron
NODE_6545_length_21072_cov_36.064541 mapping	11901	MNV	2	TT	CG	Heterozygous	6	11	54.5455	0.5	35.9167	intron
NODE_6545_length_21072_cov_36.064541 mapping	11922	SNV	1	G	C	Heterozygous	4	12	33.3333	0.25	38.75	intron
NODE_6545_length_21072_cov_36.064541 mapping	11925	SNV	1	A	G	Heterozygous	4	12	33.3333	0.25	37	intron
NODE_6545_length_21072_cov_36.064541 mapping	11935	SNV	1	G	T	Heterozygous	8	12	66.6667	0.25	38	intron
NODE_6684_length_6643_cov_16.947163 mapping	773	SNV	1	A	T	Homozygous	14	14	100	0.214286	39.5	intergenic
NODE_6684_length_6643_cov_16.947163 mapping	793	SNV	1	C	A	Homozygous	14	14	100	0.214286	39.9286	intergenic
NODE_6684_length_6643_cov_16.947163 mapping	817	SNV	1	C	A	Homozygous	13	13	100	0.230769	39.9231	intergenic
NODE_6684_length_6643_cov_16.947163 mapping	823	Deletion	1	A	-	Homozygous	14	14	100	0.214286	39.0714	intergenic
NODE_6684_length_6643_cov_16.947163 mapping	826	SNV	1	C	G	Homozygous	14	14	100	0.214286	39.6429	intergenic
NODE_6684_length_6643_cov_16.947163 mapping	916	Deletion	1	A	-	Heterozygous	7	11	63.6364	0.142857	38.1429	intergenic
NODE_6684_length_6643_cov_16.947163 mapping	923	SNV	1	T	A	Homozygous	8	11	72.7273	0.25	38.875	intergenic
NODE_6684_length_6643_cov_16.947163 mapping	926	SNV	1	C	G	Homozygous	8	10	80	0.25	39.625	intergenic
NODE_6684_length_6643_cov_16.947163 mapping	948	SNV	1	A	T	Heterozygous	3	13	23.0769	0.333333	41	intergenic
NODE_6684_length_6643_cov_16.947163 mapping	968	SNV	1	C	T	Homozygous	14	14	100	0.214286	38.5714	intergenic
NODE_6684_length_6643_cov_16.947163 mapping	978	SNV	1	A	T	Heterozygous	9	13	69.2308	0.222222	39.5556	intergenic
NODE_6684_length_6643_cov_16.947163 mapping	980	SNV	1	G	A	Homozygous	13	13	100	0.230769	38.9231	intergenic
NODE_6684_length_6643_cov_16.947163 mapping	987	MNV	2	TA	AT	Heterozygous	2	11	18.1818	0.5	39.25	intergenic
NODE_6650_length_1127_cov_3009.265381 mapping	369	SNV	1	C	T	Homozygous	250	275	90.9091	0.476	35.776	intergenic
NODE_6836_length_15559_cov_54.318081 mapping	12730	SNV	1	T	G	Homozygous	12	12	100	0.166667	37.25	intron
NODE_6836_length_15559_cov_54.318081 mapping	12739	SNV	1	C	T	Heterozygous	6	11	54.5455	0.166667	36.6667	intron
NODE_6836_length_15559_cov_54.318081 mapping	12742	SNV	1	A	T	Homozygous	11	11	100	0.181818	38.1818	intron
NODE_6836_length_15559_cov_54.318081 mapping	12754	MNV	2	TG	CA	Homozygous	12	12	100	0.166667	37.9583	intron
NODE_6836_length_15559_cov_54.318081 mapping	12762	SNV	1	C	T	Homozygous	12	12	100	0.166667	38.75	intron
NODE_6836_length_15559_cov_54.318081 mapping	12766	SNV	1	C	A	Homozygous	11	11	100	0.181818	39.7273	intron
NODE_6836_length_15559_cov_54.318081 mapping	12769	SNV	1	C	T	Homozygous	11	11	100	0.181818	37.6364	intron
NODE_6836_length_15559_cov_54.318081 mapping	12785	SNV	1	T	C	Homozygous	12	12	100	0.166667	37.5	intron
NODE_6836_length_15559_cov_54.318081 mapping	12808	SNV	1	A	G	Homozygous	10	10	100	0.3	36.4	intron
NODE_6836_length_15559_cov_54.318081 mapping	12811	SNV	1	T	A	Homozygous	10	10	100	0.3	37.6	intron
NODE_6836_length_15559_cov_54.318081 mapping	12923	SNV	1	A	G	Homozygous	15	15	100	0.2	35.6667	intron
NODE_6836_length_15559_cov_54.318081 mapping	12963	SNV	1	A	T	Homozygous	12	12	100	0.25	39.4167	intron
NODE_6836_length_15559_cov_54.318081 mapping	12966	SNV	1	C	T	Homozygous	12	12	100	0.25	39.6667	intron
NODE_6836_length_15559_cov_54.318081 mapping	14579	SNV	1	C	T	Homozygous	10	10	100	0.3	36.7	intron
NODE_6836_length_15559_cov_54.318081 mapping	14757	SNV	1	T	G	Homozygous	10	11	90.9091	0.4	37.9	intron
NODE_6725_length_6349_cov_49.714287 mapping	4729	SNV	1	T	C	Homozygous	10	12	83.3333	0.5	38.6	intergenic
NODE_6725_length_6349_cov_49.714287 mapping	4732	SNV	1	T	G	Homozygous	11	11	100	0.454545	37.4545	intergenic
NODE_7005_length_1375_cov_43.627636 mapping	446	SNV	1	C	T	Homozygous	11	11	100	0.272727	39.4545	intergenic
NODE_7005_length_1375_cov_43.627636 mapping	457	SNV	1	C	G	Heterozygous	6	11	54.5455	0.333333	39.5	intergenic
NODE_7005_length_1375_cov_43.627636 mapping	459	SNV	1	G	A	Homozygous	11	11	100	0.272727	38.8182	intergenic
NODE_7005_length_1375_cov_43.627636 mapping	465	Deletion	1	A	-	Heterozygous	6	11	54.5455	0.333333	32.8333	intergenic
NODE_7005_length_1375_cov_43.627636 mapping	481	SNV	1	A	T	Heterozygous	5	10	50	0.2	38.2	intergenic
NODE_7160_length_4300_cov_62.576511 mapping	3366	SNV	1	C	A	Heterozygous	6	10	60	0.166667	36.6667	intergenic
NODE_7234_length_7004_cov_55.302971 mapping	683	SNV	1	T	A	Homozygous	11	11	100	0.272727	38.0909	intergenic
NODE_7234_length_7004_cov_55.302971 mapping	694	SNV	1	A	T	Homozygous	10	10	100	0.3	38.5	intergenic
NODE_7347_length_1943_cov_2513.013428 mapping	458	SNV	1	T	G	Homozygous	348	351	99.1453	0.445402	36.8937	exon
NODE_7473_length_23642_cov_29.673632 mapping	1921	SNV	1	T	A	Homozygous	9	10	90	0.444444	38.4444	intergenic
NODE_7473_length_23642_cov_29.673632 mapping	12200	SNV	1	C	T	Homozygous	10	10	100	0.454545	33.9091	intergenic
NODE_7473_length_23642_cov_29.673632 mapping	12207	Deletion	1	G	-	Homozygous	10	10	100	0.454545	35.8182	intergenic
NODE_7473_length_23642_cov_29.673632 mapping	12210	SNV	1	A	C	Homozygous	10	10	100	0.454545	37.2727	intergenic
NODE_7473_length_23642_cov_29.673632 mapping	12215	Deletion	1	A	-	Homozygous	10	10	100	0.454545	37.6364	intergenic
NODE_7473_length_23642_cov_29.673632 mapping	12222	SNV	1	T	A	Homozygous	10	10	100	0.454545	37.7273	intergenic
NODE_7473_length_23642_cov_29.673632 mapping	13028	SNV	1	A	G	Homozygous	10	10	100	0.4	36.8	intergenic
NODE_7473_length_23642_cov_29.673632 mapping	13039	SNV	1	G	C	Homozygous	11	11	100	0.363636	39	intergenic
NODE_7473_length_23642_cov_29.673632 mapping	13046	SNV	1	A	G	Homozygous	11	11	100	0.363636	37.5455	intergenic
NODE_7510_length_7466_cov_8.005090 mapping	2643	SNV	1	T	G	Heterozygous	6	10	60	0.166667	37	exon
NODE_7510_length_7466_cov_8.005090 mapping	2654	SNV	1	G	A	Heterozygous	7	13	53.8462	0.285714	35.8571	exon
NODE_7510_length_7466_cov_8.005090 mapping	2665	SNV	1	T	G	Heterozygous	6	14	42.8571	0.166667	38.8333	exon
NODE_7510_length_7466_cov_8.005090 mapping	2683	SNV	1	C	A	Heterozygous	7	15	46.6667	0.428571	34.7143	exon
NODE_7510_length_7466_cov_8.005090 mapping	2697	SNV	1	A	G	Homozygous	13	13	100	0.384615	36.2308	exon
NODE_7510_length_7466_cov_8.005090 mapping	2709	SNV	1	T	G	Homozygous	13	13	100	0.461538	35.4615	exon
NODE_7587_length_972_cov_49.313786 mapping	657	SNV	1	C	T	Homozygous	10	10	100	0.4	36.7	intergenic
NODE_7587_length_972_cov_49.313786 mapping	659	MNV	2	CG	AT	Heterozygous	4	10	40	0.25	37.75	intergenic
NODE_7587_length_972_cov_49.313786 mapping	660	SNV	1	G	T	Heterozygous	6	10	60	0.5	37.5833	intergenic
NODE_7587_length_972_cov_49.313786 mapping	665	SNV	1	A	C	Homozygous	14	14	100	0.357143	37.6429	intergenic
NODE_7587_length_972_cov_49.313786 mapping	681	SNV	1	T	C	Homozygous	15	15	100	0.333333	36.8667	intergenic
NODE_7587_length_972_cov_49.313786 mapping	733	SNV	1	G	T	Heterozygous	4	11	36.3636	0.25	37.75	intergenic
NODE_7620_length_1876_cov_3617.776611 mapping	139	SNV	1	G	T	Heterozygous	7	18	38.8889	0.285714	38.8571	intergenic
NODE_7620_length_1876_cov_3617.776611 mapping	151	SNV	1	C	T	Heterozygous	8	23	34.7826	0.25	39.75	intergenic
NODE_7620_length_1876_cov_3617.776611 mapping	230	SNV	1	C	T	Heterozygous	9	39	23.0769	0.3	36.4	intergenic
NODE_7620_length_1876_cov_3617.776611 mapping	241	SNV	1	G	A	Heterozygous	11	39	28.2051	0.181818	34.6364	intergenic
NODE_7620_length_1876_cov_3617.776611 mapping	268	SNV	1	C	A	Heterozygous	19	36	52.7778	0.368421	36.0278	intergenic
NODE_7620_length_1876_cov_3617.776611 mapping	268	SNV	1	C	G	Heterozygous	8	36	22.2222	0.375	40.1333	intergenic
NODE_7620_length_1876_cov_3617.776611 mapping	268	MNV	2	CT	AA	Heterozygous	9	36	25	0.444444	37.3333	intergenic
NODE_7620_length_1876_cov_3617.776611 mapping	326	SNV	1	G	A	Heterozygous	19	40	47.5	0.315789	36.1053	intergenic
NODE_7620_length_1876_cov_3617.776611 mapping	331	SNV	1	G	T	Heterozygous	12	41	29.2683	0.416667	40	intergenic
NODE_7620_length_1876_cov_3617.776611 mapping	368	SNV	1	A	T	Heterozygous	16	52	30.7692	0.25	39.9375	intergenic
NODE_7620_length_1876_cov_3617.776611 mapping	372	SNV	1	C	T	Heterozygous	23	49	46.9388	0.416667	37.625	intergenic
NODE_7620_length_1876_cov_3617.776611 mapping	378	SNV	1	G	A	Heterozygous	16	48	33.3333	0.375	37.4375	intergenic
NODE_7620_length_1876_cov_3617.776611 mapping	384	SNV	1	G	A	Heterozygous	13	51	25.4902	0.307692	37.5385	intergenic
NODE_7620_length_1876_cov_3617.776611 mapping	386	SNV	1	C	T	Heterozygous	16	51	31.3725	0.4375	38.625	intergenic
NODE_7620_length_1876_cov_3617.776611 mapping	402	SNV	1	C	T	Heterozygous	13	47	27.6596	0.153846	37.4615	intergenic
NODE_7620_length_1876_cov_3617.776611 mapping	405	SNV	1	G	A	Heterozygous	12	49	24.4898	0.333333	38.8333	intergenic
NODE_7620_length_1876_cov_3617.776611 mapping	438	SNV	1	C	T	Heterozygous	15	46	32.6087	0.466667	37.2667	intergenic
NODE_7620_length_1876_cov_3617.776611 mapping	440	SNV	1	G	A	Heterozygous	12	38	31.5789	0.333333	38.1667	intergenic
NODE_7620_length_1876_cov_3617.776611 mapping	455	SNV	1	A	T	Heterozygous	11	37	29.7297	0.454545	37.8182	intergenic
NODE_7620_length_1876_cov_3617.776611 mapping	469	SNV	1	G	A	Heterozygous	21	36	58.3333	0.333333	36.1429	intergenic
NODE_7620_length_1876_cov_3617.776611 mapping	488	SNV	1	C	T	Heterozygous	13	35	37.1429	0.461538	36.1538	intergenic
NODE_7620_length_1876_cov_3617.776611 mapping	531	SNV	1	C	T	Heterozygous	12	30	40	0.25	39.1667	intergenic
NODE_7620_length_1876_cov_3617.776611 mapping	570	SNV	1	G	A	Heterozygous	8	31	25.8065	0.375	36	intergenic
NODE_7620_length_1876_cov_3617.776611 mapping	578	SNV	1	G	A	Heterozygous	11	34	32.3529	0.454545	36.8182	intergenic
NODE_7620_length_1876_cov_3617.776611 mapping	640	SNV	1	C	T	Heterozygous	17	35	48.5714	0.294118	38.8235	intergenic
NODE_7620_length_1876_cov_3617.776611 mapping	659	SNV	1	G	A	Heterozygous	9	34	26.4706	0.333333	36.6667	intergenic
NODE_7620_length_1876_cov_3617.776611 mapping	735	SNV	1	G	A	Heterozygous	14	37	37.8378	0.428571	37.5	intergenic
NODE_7620_length_1876_cov_3617.776611 mapping	774	SNV	1	A	T	Heterozygous	17	33	51.5152	0.411765	37.4706	intergenic
NODE_7620_length_1876_cov_3617.776611 mapping	796	SNV	1	C	T	Heterozygous	13	29	44.8276	0.230769	37.6154	intergenic
NODE_7620_length_1876_cov_3617.776611 mapping	857	SNV	1	C	T	Homozygous	42	42	100	0.465116	37.8372	intergenic
NODE_7620_length_1876_cov_3617.776611 mapping	899	SNV	1	A	T	Heterozygous	15	45	33.3333	0.466667	36.8667	intergenic
NODE_7620_length_1876_cov_3617.776611 mapping	919	SNV	1	C	T	Heterozygous	11	43	25.5814	0.363636	39.9091	intergenic
NODE_7620_length_1876_cov_3617.776611 mapping	926	SNV	1	A	G	Heterozygous	11	42	26.1905	0.454545	38.6364	intergenic
NODE_7620_length_1876_cov_3617.776611 mapping	939	SNV	1	G	A	Heterozygous	10	40	25	0.5	38.3	intergenic
NODE_7620_length_1876_cov_3617.776611 mapping	1206	SNV	1	C	A	Homozygous	168	170	98.8235	0.210526	36.2047	intergenic
NODE_7620_length_1876_cov_3617.776611 mapping	1665	Insertion	4	-	AAGA	Heterozygous	72	144	50	0.0555556	36.8819	intergenic
NODE_7620_length_1876_cov_3617.776611 mapping	1665	Insertion	1	-	A	Heterozygous	5	144	3.47222	0	38.5714	intergenic
NODE_7650_length_3000_cov_88.939667 mapping	2201	SNV	1	G	T	Homozygous	10	10	100	0.3	33.7	intergenic
NODE_7650_length_3000_cov_88.939667 mapping	2205	SNV	1	G	A	Homozygous	10	10	100	0.3	38.7	intergenic
NODE_7650_length_3000_cov_88.939667 mapping	2212	SNV	1	G	C	Homozygous	11	11	100	0.272727	39.8182	intergenic
NODE_7650_length_3000_cov_88.939667 mapping	2219	SNV	1	G	T	Homozygous	11	11	100	0.272727	37.9091	intergenic
NODE_5746_length_39283_cov_15.945320 mapping	5035	SNV	1	G	T	Homozygous	10	10	100	0.4	36.3	intergenic
NODE_5746_length_39283_cov_15.945320 mapping	15438	SNV	1	T	G	Heterozygous	4	11	36.3636	0.25	37.5	exon
NODE_5746_length_39283_cov_15.945320 mapping	15448	SNV	1	T	C	Homozygous	10	10	100	0.3	37.6	exon
NODE_5746_length_39283_cov_15.945320 mapping	15552	MNV	2	GC	AT	Heterozygous	6	15	40	0.166667	38.5833	intron
NODE_5746_length_39283_cov_15.945320 mapping	15583	SNV	1	A	T	Heterozygous	7	19	36.8421	0.285714	40	intron
NODE_5746_length_39283_cov_15.945320 mapping	15608	SNV	1	G	A	Homozygous	16	17	94.1176	0.352941	38.7059	intron
NODE_5746_length_39283_cov_15.945320 mapping	15612	Insertion	1	-	G	Homozygous	15	17	88.2353	0.3125	37.0625	intron
NODE_5746_length_39283_cov_15.945320 mapping	15615	SNV	1	A	G	Heterozygous	6	17	35.2941	0.333333	32	intron
NODE_5746_length_39283_cov_15.945320 mapping	15620	SNV	1	A	T	Homozygous	16	16	100	0.352941	37.1765	intron
NODE_5746_length_39283_cov_15.945320 mapping	15638	SNV	1	A	C	Homozygous	10	10	100	0.454545	38.0909	intron
NODE_5746_length_39283_cov_15.945320 mapping	15691	SNV	1	T	A	Homozygous	10	10	100	0.5	38.4	intron
NODE_5746_length_39283_cov_15.945320 mapping	15695	MNV	3	TTC	CAT	Heterozygous	4	10	40	0.5	39.0833	intron
NODE_5746_length_39283_cov_15.945320 mapping	15696	MNV	2	TC	AT	Heterozygous	6	10	60	0.5	37.0556	intron
NODE_5746_length_39283_cov_15.945320 mapping	15731	MNV	2	GC	TG	Homozygous	17	17	100	0.352941	38.8824	exon
NODE_5746_length_39283_cov_15.945320 mapping	15738	SNV	1	A	G	Homozygous	17	17	100	0.352941	38.1765	exon
NODE_5746_length_39283_cov_15.945320 mapping	15754	SNV	1	C	T	Heterozygous	5	22	22.7273	0.4	38.4	intron
NODE_5746_length_39283_cov_15.945320 mapping	15801	SNV	1	T	A	Homozygous	12	15	80	0.416667	38.4167	intron
NODE_5746_length_39283_cov_15.945320 mapping	15837	SNV	1	A	C	Homozygous	6	17	35.2941	0.166667	38.1667	intron
NODE_5746_length_39283_cov_15.945320 mapping	15870	SNV	1	A	T	Homozygous	18	22	81.8182	0.277778	38.6111	exon
NODE_5746_length_39283_cov_15.945320 mapping	15932	SNV	1	T	C	Homozygous	20	23	86.9565	0.25	37.55	exon
NODE_5746_length_39283_cov_15.945320 mapping	15946	SNV	1	A	G	Homozygous	12	23	52.1739	0.333333	38.4167	exon
NODE_5746_length_39283_cov_15.945320 mapping	15949	SNV	1	C	T	Homozygous	20	21	95.2381	0.15	38.25	exon
NODE_5746_length_39283_cov_15.945320 mapping	15975	SNV	1	T	C	Heterozygous	11	34	32.3529	0.454545	35	intron
NODE_5746_length_39283_cov_15.945320 mapping	15985	MNV	2	TG	CC	Heterozygous	23	38	60.5263	0.434783	37.4348	intron
NODE_5746_length_39283_cov_15.945320 mapping	15986	SNV	1	G	C	Heterozygous	5	38	13.1579	0	41.75	intron
NODE_5746_length_39283_cov_15.945320 mapping	15999	SNV	1	T	A	Heterozygous	24	37	64.8649	0.458333	39.625	intron
NODE_5746_length_39283_cov_15.945320 mapping	16012	SNV	1	C	G	Heterozygous	9	34	26.4706	0.444444	39.2222	intron
NODE_5746_length_39283_cov_15.945320 mapping	16032	SNV	1	T	C	Heterozygous	20	28	71.4286	0.45	39.1	intron
NODE_5746_length_39283_cov_15.945320 mapping	16040	SNV	1	T	C	Heterozygous	20	28	71.4286	0.45	39.1	intron
NODE_5746_length_39283_cov_15.945320 mapping	16045	SNV	1	C	A	Homozygous	22	26	84.6154	0.409091	38.9091	intron
NODE_5746_length_39283_cov_15.945320 mapping	16056	SNV	1	G	C	Homozygous	19	19	100	0.421053	37.1053	intron
NODE_5746_length_39283_cov_15.945320 mapping	16060	SNV	1	T	C	Homozygous	12	13	92.3077	0.333333	38.1667	intron
NODE_5746_length_39283_cov_15.945320 mapping	17052	SNV	1	C	A	Homozygous	8	21	38.0952	0.125	40.625	intron
NODE_5746_length_39283_cov_15.945320 mapping	17070	SNV	1	G	T	Homozygous	10	23	43.4783	0.1	35.2	intron
NODE_5746_length_39283_cov_15.945320 mapping	17085	SNV	1	T	A	Homozygous	15	24	62.5	0.0666667	40.2667	intron
NODE_5746_length_39283_cov_15.945320 mapping	17173	SNV	1	C	T	Heterozygous	10	28	35.7143	0.2	39.5	exon
NODE_5746_length_39283_cov_15.945320 mapping	17189	SNV	1	G	T	Heterozygous	12	29	41.3793	0.230769	37.1538	exon
NODE_5746_length_39283_cov_15.945320 mapping	17235	Deletion	1	C	-	Homozygous	34	34	100	0.257143	38.7714	intron
NODE_5746_length_39283_cov_15.945320 mapping	17243	SNV	1	T	A	Heterozygous	12	36	33.3333	0.166667	40.5833	intron
NODE_5746_length_39283_cov_15.945320 mapping	17244	SNV	1	G	A	Heterozygous	23	36	63.8889	0.26087	39.087	intron
NODE_5746_length_39283_cov_15.945320 mapping	17252	SNV	1	C	T	Heterozygous	20	39	51.2821	0.25	39.3	intron
NODE_5746_length_39283_cov_15.945320 mapping	17265	SNV	1	T	A	Homozygous	41	41	100	0.292683	38.5366	intron
NODE_5746_length_39283_cov_15.945320 mapping	17290	SNV	1	G	A	Homozygous	37	37	100	0.243243	38.4595	intron
NODE_5746_length_39283_cov_15.945320 mapping	17315	MNV	2	TA	AC	Homozygous	29	29	100	0.275862	38.0862	intron
NODE_5746_length_39283_cov_15.945320 mapping	17330	SNV	1	A	T	Homozygous	21	21	100	0.238095	39.0476	intron
NODE_5746_length_39283_cov_15.945320 mapping	17349	SNV	1	G	T	Homozygous	14	14	100	0.285714	38.7857	intron
NODE_5746_length_39283_cov_15.945320 mapping	17357	SNV	1	G	A	Homozygous	10	10	100	0.1	36	intron
NODE_5746_length_39283_cov_15.945320 mapping	21877	SNV	1	G	A	Heterozygous	7	11	63.6364	0.285714	35.5714	intron
NODE_5746_length_39283_cov_15.945320 mapping	21900	SNV	1	T	C	Homozygous	16	18	88.8889	0.25	35.75	intron
NODE_5746_length_39283_cov_15.945320 mapping	21907	SNV	1	G	T	Homozygous	11	17	64.7059	0.272727	36.0909	intron
NODE_5746_length_39283_cov_15.945320 mapping	21910	SNV	1	G	A	Homozygous	11	17	64.7059	0.272727	34.9091	intron
NODE_5746_length_39283_cov_15.945320 mapping	21912	SNV	1	C	G	Homozygous	16	17	94.1176	0.1875	34.875	intron
NODE_5746_length_39283_cov_15.945320 mapping	21915	SNV	1	T	C	Homozygous	17	17	100	0.235294	36.1765	intron
NODE_5746_length_39283_cov_15.945320 mapping	21918	SNV	1	G	A	Heterozygous	13	17	76.4706	0.230769	33.4615	intron
NODE_5746_length_39283_cov_15.945320 mapping	21953	SNV	1	G	A	Homozygous	15	15	100	0.2	35.6	intron
NODE_5746_length_39283_cov_15.945320 mapping	22083	MNV	2	AG	CA	Homozygous	13	13	100	0.153846	37.2692	intron
NODE_5746_length_39283_cov_15.945320 mapping	22091	SNV	1	T	C	Homozygous	9	13	69.2308	0.111111	34.8889	intron
NODE_5746_length_39283_cov_15.945320 mapping	22531	SNV	1	T	C	Homozygous	10	10	100	0.4	36.8	intron
NODE_5746_length_39283_cov_15.945320 mapping	22537	SNV	1	T	A	Heterozygous	4	10	40	0.25	37.25	intron
NODE_5746_length_39283_cov_15.945320 mapping	22555	SNV	1	G	T	Heterozygous	6	10	60	0.333333	37	intron
NODE_5746_length_39283_cov_15.945320 mapping	32190	SNV	1	A	T	Homozygous	6	10	60	0.166667	39.6667	intergenic
NODE_5746_length_39283_cov_15.945320 mapping	32474	SNV	1	T	C	Homozygous	2	11	18.1818	0.5	39.75	intergenic
NODE_5746_length_39283_cov_15.945320 mapping	32483	SNV	1	A	T	Homozygous	10	10	100	0.166667	37.6667	intergenic
NODE_4999_length_52722_cov_16.334301 mapping	26839	SNV	1	G	A	Heterozygous	3	10	30	0.333333	34.6667	intron
NODE_4999_length_52722_cov_16.334301 mapping	26900	SNV	1	A	G	Heterozygous	3	10	30	0.25	34	intron
NODE_4999_length_52722_cov_16.334301 mapping	26906	SNV	1	C	T	Heterozygous	4	11	36.3636	0.25	37	intron
NODE_4999_length_52722_cov_16.334301 mapping	26912	SNV	1	C	A	Heterozygous	3	11	27.2727	0.25	36.25	intron
NODE_4999_length_52722_cov_16.334301 mapping	26916	SNV	1	T	A	Heterozygous	3	11	27.2727	0.25	33.75	intron
NODE_4999_length_52722_cov_16.334301 mapping	26919	SNV	1	A	T	Heterozygous	4	10	40	0.5	36	intron
NODE_4999_length_52722_cov_16.334301 mapping	26923	SNV	1	C	A	Heterozygous	7	10	70	0.428571	36.1429	intron
NODE_5535_length_41202_cov_27.453133 mapping	30089	SNV	1	T	A	Heterozygous	7	10	70	0.142857	38.4286	intergenic
NODE_5535_length_41202_cov_27.453133 mapping	30090	SNV	1	T	A	Heterozygous	3	10	30	0.333333	36.3333	intergenic
NODE_5535_length_41202_cov_27.453133 mapping	30111	SNV	1	C	T	Homozygous	10	10	100	0.3	36.8	intergenic
NODE_5535_length_41202_cov_27.453133 mapping	30115	SNV	1	T	G	Heterozygous	4	10	40	0.5	36.75	intergenic
NODE_5535_length_41202_cov_27.453133 mapping	30115	SNV	1	T	C	Heterozygous	3	10	30	0.333333	37	intergenic
NODE_5535_length_41202_cov_27.453133 mapping	30118	SNV	1	C	T	Homozygous	10	10	100	0.3	39	intergenic
NODE_5535_length_41202_cov_27.453133 mapping	30471	SNV	1	T	C	Homozygous	10	10	100	0.2	38.6	intergenic
NODE_5535_length_41202_cov_27.453133 mapping	30479	MNV	2	GC	AG	Homozygous	11	11	100	0.181818	38.619	intergenic
NODE_5535_length_41202_cov_27.453133 mapping	30487	SNV	1	T	C	Homozygous	11	11	100	0.181818	38.9091	intergenic
NODE_5535_length_41202_cov_27.453133 mapping	30493	SNV	1	A	C	Homozygous	4	10	40	0.25	37.75	intergenic
NODE_5535_length_41202_cov_27.453133 mapping	30674	SNV	1	G	A	Heterozygous	8	10	80	0.25	39.875	intergenic
NODE_5535_length_41202_cov_27.453133 mapping	30681	SNV	1	A	G	Homozygous	10	10	100	0.3	39.8	intergenic
NODE_5535_length_41202_cov_27.453133 mapping	30687	SNV	1	C	T	Heterozygous	9	11	81.8182	0.333333	39.3333	intergenic
NODE_5535_length_41202_cov_27.453133 mapping	30697	SNV	1	A	G	Homozygous	11	11	100	0.363636	40.8182	intergenic
NODE_5535_length_41202_cov_27.453133 mapping	30723	MNV	2	CC	AT	Heterozygous	8	10	80	0.375	38.9375	intergenic
NODE_7918_length_22352_cov_20.373478 mapping	20978	SNV	1	A	G	Homozygous	10	10	100	0.181818	37.1818	intron
NODE_7918_length_22352_cov_20.373478 mapping	20982	Deletion	1	G	-	Homozygous	10	10	100	0.2	37.3	intron
NODE_8208_length_1046_cov_67.073616 mapping	168	MNV	2	GG	TA	Homozygous	25	25	100	0.28	37.44	intergenic
NODE_8208_length_1046_cov_67.073616 mapping	184	Deletion	2	AC	-	Homozygous	25	25	100	0.4	36.0213	intergenic
NODE_8208_length_1046_cov_67.073616 mapping	189	SNV	1	C	T	Homozygous	26	27	96.2963	0.461538	37.3846	intergenic
NODE_8208_length_1046_cov_67.073616 mapping	198	SNV	1	C	T	Homozygous	34	34	100	0.441176	38.1765	intergenic
NODE_8208_length_1046_cov_67.073616 mapping	209	SNV	1	A	T	Homozygous	53	54	98.1481	0.377358	37.8868	intergenic
NODE_8208_length_1046_cov_67.073616 mapping	221	SNV	1	G	A	Homozygous	71	71	100	0.352113	37.3944	intergenic
NODE_8208_length_1046_cov_67.073616 mapping	233	SNV	1	G	A	Homozygous	80	87	91.954	0.3125	38.1875	intergenic
NODE_8208_length_1046_cov_67.073616 mapping	235	SNV	1	T	C	Homozygous	86	87	98.8506	0.325581	38.5233	intergenic
NODE_8208_length_1046_cov_67.073616 mapping	254	SNV	1	T	C	Heterozygous	28	98	28.5714	0.25	39.0714	intergenic
NODE_8208_length_1046_cov_67.073616 mapping	274	SNV	1	A	G	Homozygous	76	90	84.4444	0.315789	37.7368	intergenic
NODE_8208_length_1046_cov_67.073616 mapping	285	SNV	1	T	C	Homozygous	79	79	100	0.265823	37.1266	intergenic
NODE_8208_length_1046_cov_67.073616 mapping	287	SNV	1	G	A	Homozygous	76	79	96.2025	0.263158	37.7763	intergenic
NODE_8208_length_1046_cov_67.073616 mapping	308	SNV	1	T	G	Homozygous	37	37	100	0.297297	35.5946	intergenic
NODE_8208_length_1046_cov_67.073616 mapping	311	SNV	1	C	T	Homozygous	37	37	100	0.297297	35.8919	intergenic
NODE_8208_length_1046_cov_67.073616 mapping	315	Replacement	2	CC	T	Homozygous	14	14	100	0.357143	39.1071	intergenic
NODE_8208_length_1046_cov_67.073616 mapping	320	Insertion	1	-	A	Homozygous	12	14	85.7143	0.333333	37.5833	intergenic
NODE_8208_length_1046_cov_67.073616 mapping	322	SNV	1	G	A	Homozygous	13	14	92.8571	0.384615	38.6154	intergenic
NODE_8208_length_1046_cov_67.073616 mapping	325	Deletion	1	T	-	Homozygous	13	14	92.8571	0.384615	36.5385	intergenic
NODE_8208_length_1046_cov_67.073616 mapping	329	SNV	1	A	C	Homozygous	13	14	92.8571	0.384615	38.1538	intergenic
NODE_8208_length_1046_cov_67.073616 mapping	335	SNV	1	G	A	Homozygous	13	14	92.8571	0.384615	36.0769	intergenic
NODE_8208_length_1046_cov_67.073616 mapping	388	SNV	1	A	G	Homozygous	40	40	100	0.45	36.625	intergenic
NODE_8208_length_1046_cov_67.073616 mapping	415	SNV	1	T	A	Homozygous	76	82	92.6829	0.355263	34.8684	intergenic
NODE_8208_length_1046_cov_67.073616 mapping	439	SNV	1	A	C	Homozygous	103	103	100	0.378641	36.835	intergenic
NODE_8208_length_1046_cov_67.073616 mapping	466	SNV	1	C	T	Heterozygous	81	108	75	0.414634	37.7927	intergenic
NODE_8208_length_1046_cov_67.073616 mapping	481	SNV	1	A	T	Homozygous	85	105	80.9524	0.458824	37.7176	intergenic
NODE_8208_length_1046_cov_67.073616 mapping	512	MNV	2	AA	GC	Homozygous	72	72	100	0.347222	37.0972	intergenic
NODE_8208_length_1046_cov_67.073616 mapping	520	SNV	1	A	T	Homozygous	68	68	100	0.338235	37.4265	intergenic
NODE_8208_length_1046_cov_67.073616 mapping	522	SNV	1	T	C	Homozygous	66	69	95.6522	0.333333	38.2424	intergenic
NODE_8208_length_1046_cov_67.073616 mapping	524	SNV	1	G	A	Heterozygous	19	74	25.6757	0.263158	38	intergenic
NODE_8208_length_1046_cov_67.073616 mapping	570	SNV	1	G	A	Homozygous	25	25	100	0.32	37.4	intergenic
NODE_8208_length_1046_cov_67.073616 mapping	572	SNV	1	C	T	Homozygous	25	25	100	0.32	37.28	intergenic
NODE_8208_length_1046_cov_67.073616 mapping	574	SNV	1	A	T	Homozygous	24	25	96	0.333333	36.9167	intergenic
NODE_8208_length_1046_cov_67.073616 mapping	581	SNV	1	G	T	Heterozygous	13	33	39.3939	0.461538	32.8462	intergenic
NODE_8208_length_1046_cov_67.073616 mapping	587	SNV	1	C	T	Heterozygous	8	33	24.2424	0.375	37.875	intergenic
NODE_8208_length_1046_cov_67.073616 mapping	587	MNV	2	CG	TA	Heterozygous	25	33	75.7576	0.44	35.56	intergenic
NODE_8208_length_1046_cov_67.073616 mapping	605	MNV	2	CT	TC	Homozygous	36	36	100	0.305556	37.0417	intergenic
NODE_8208_length_1046_cov_67.073616 mapping	619	SNV	1	A	T	Homozygous	27	27	100	0.259259	38.6667	intergenic
NODE_8208_length_1046_cov_67.073616 mapping	642	SNV	1	T	A	Homozygous	48	50	96	0.270833	38.5208	intergenic
NODE_8208_length_1046_cov_67.073616 mapping	679	SNV	1	G	T	Heterozygous	46	92	50	0.391304	38.2609	intergenic
NODE_8208_length_1046_cov_67.073616 mapping	709	SNV	1	A	G	Homozygous	102	106	96.2264	0.470588	38.8137	intergenic
NODE_8208_length_1046_cov_67.073616 mapping	728	SNV	1	A	G	Homozygous	97	121	80.1653	0.412371	38.9072	intergenic
NODE_8208_length_1046_cov_67.073616 mapping	745	SNV	1	A	G	Homozygous	86	90	95.5556	0.337209	38.8953	intergenic
NODE_8208_length_1046_cov_67.073616 mapping	747	MNV	2	CC	TT	Homozygous	89	89	100	0.325843	38.4551	intergenic
NODE_8208_length_1046_cov_67.073616 mapping	753	SNV	1	T	C	Homozygous	84	92	91.3043	0.345238	38.9881	intergenic
NODE_8208_length_1046_cov_67.073616 mapping	781	SNV	1	A	G	Homozygous	57	64	89.0625	0.224138	38.0345	intergenic
NODE_8208_length_1046_cov_67.073616 mapping	785	SNV	1	G	A	Homozygous	66	67	98.5075	0.253731	37.6418	intergenic
NODE_8208_length_1046_cov_67.073616 mapping	794	SNV	1	T	A	Homozygous	62	64	96.875	0.274194	37.9032	intergenic
NODE_8208_length_1046_cov_67.073616 mapping	816	SNV	1	T	C	Homozygous	55	56	98.2143	0.464286	37.2143	intergenic
NODE_8208_length_1046_cov_67.073616 mapping	838	SNV	1	T	A	Homozygous	52	59	88.1356	0.365385	37.2115	intergenic
NODE_8208_length_1046_cov_67.073616 mapping	879	SNV	1	A	T	Homozygous	54	55	98.1818	0.166667	37.7037	intergenic
NODE_8208_length_1046_cov_67.073616 mapping	884	SNV	1	T	G	Heterozygous	39	51	76.4706	0.0512821	38.7692	intergenic
NODE_8291_length_6701_cov_53.826443 mapping	2358	SNV	1	G	C	Homozygous	10	10	100	0.4	40	intergenic
NODE_5835_length_31971_cov_23.167089 mapping	719	SNV	1	C	G	Homozygous	15	16	93.75	0.0666667	36.6667	intergenic
NODE_5835_length_31971_cov_23.167089 mapping	732	SNV	1	T	A	Homozygous	5	14	35.7143	0.2	32.4	intergenic
NODE_5835_length_31971_cov_23.167089 mapping	784	MNV	2	TA	CG	Homozygous	18	18	100	0.277778	38.0833	intergenic
NODE_5835_length_31971_cov_23.167089 mapping	801	SNV	1	C	T	Homozygous	20	21	95.2381	0.25	37.45	intergenic
NODE_5835_length_31971_cov_23.167089 mapping	813	SNV	1	T	C	Homozygous	18	21	85.7143	0.277778	39	intergenic
NODE_5835_length_31971_cov_23.167089 mapping	817	SNV	1	G	A	Heterozygous	6	21	28.5714	0.5	36.5	intergenic
NODE_5835_length_31971_cov_23.167089 mapping	835	SNV	1	T	C	Homozygous	26	26	100	0.423077	37.2308	intergenic
NODE_5835_length_31971_cov_23.167089 mapping	845	SNV	1	C	A	Homozygous	23	23	100	0.391304	37.0435	intergenic
NODE_5835_length_31971_cov_23.167089 mapping	878	Insertion	3	-	TAT	Heterozygous	5	16	31.25	0.2	38.2667	intergenic
NODE_5835_length_31971_cov_23.167089 mapping	940	SNV	1	T	C	Homozygous	18	18	100	0.166667	39.5	intergenic
NODE_5835_length_31971_cov_23.167089 mapping	951	SNV	1	A	C	Homozygous	21	23	91.3043	0.238095	38.7619	intergenic
NODE_5835_length_31971_cov_23.167089 mapping	1009	MNV	2	CC	GA	Homozygous	27	27	100	0.481481	38.3519	intergenic
NODE_5835_length_31971_cov_23.167089 mapping	1015	SNV	1	A	T	Homozygous	24	24	100	0.416667	38.8333	intergenic
NODE_5835_length_31971_cov_23.167089 mapping	1019	SNV	1	A	G	Homozygous	24	25	96	0.416667	38.375	intergenic
NODE_5835_length_31971_cov_23.167089 mapping	1023	SNV	1	A	G	Homozygous	16	16	100	0.125	38.6875	intergenic
NODE_5835_length_31971_cov_23.167089 mapping	1025	SNV	1	C	A	Homozygous	11	16	68.75	0.181818	39.0909	intergenic
NODE_5835_length_31971_cov_23.167089 mapping	1029	SNV	1	G	A	Homozygous	16	19	84.2105	0.1875	38.0625	intergenic
NODE_5835_length_31971_cov_23.167089 mapping	1032	SNV	1	A	C	Homozygous	19	19	100	0.157895	37.9474	intergenic
NODE_5835_length_31971_cov_23.167089 mapping	1035	SNV	1	A	G	Homozygous	9	19	47.3684	0.333333	39	intergenic
NODE_5835_length_31971_cov_23.167089 mapping	1038	SNV	1	T	C	Homozygous	19	19	100	0.157895	39.0526	intergenic
NODE_5835_length_31971_cov_23.167089 mapping	1045	SNV	1	T	G	Homozygous	18	22	81.8182	0.222222	37.5556	intergenic
NODE_5835_length_31971_cov_23.167089 mapping	1053	SNV	1	A	T	Homozygous	22	22	100	0.181818	34.4091	intergenic
NODE_5835_length_31971_cov_23.167089 mapping	1083	SNV	1	G	A	Heterozygous	10	22	45.4545	0.2	40	intergenic
NODE_5835_length_31971_cov_23.167089 mapping	1085	SNV	1	A	G	Homozygous	18	23	78.2609	0.444444	37.4444	intergenic
NODE_5835_length_31971_cov_23.167089 mapping	1094	SNV	1	T	G	Heterozygous	17	24	70.8333	0.352941	38.2353	intergenic
NODE_5835_length_31971_cov_23.167089 mapping	1103	SNV	1	T	A	Homozygous	17	23	73.913	0.294118	37	intergenic
NODE_5835_length_31971_cov_23.167089 mapping	1115	SNV	1	A	T	Homozygous	14	20	70	0.285714	39.4286	intergenic
NODE_5835_length_31971_cov_23.167089 mapping	1118	SNV	1	A	G	Homozygous	20	20	100	0.2	38	intergenic
NODE_5835_length_31971_cov_23.167089 mapping	1121	SNV	1	A	T	Homozygous	14	20	70	0.285714	39.2857	intergenic
NODE_5835_length_31971_cov_23.167089 mapping	1128	SNV	1	A	G	Homozygous	13	18	72.2222	0.230769	36.7692	intergenic
NODE_5835_length_31971_cov_23.167089 mapping	1279	SNV	1	C	T	Homozygous	27	27	100	0.296296	39.1481	intergenic
NODE_5835_length_31971_cov_23.167089 mapping	1298	SNV	1	A	C	Homozygous	26	30	86.6667	0.346154	37.8462	intergenic
NODE_5835_length_31971_cov_23.167089 mapping	1305	SNV	1	C	T	Heterozygous	22	31	70.9677	0.0909091	38.3182	intergenic
NODE_5835_length_31971_cov_23.167089 mapping	1313	MNV	2	TA	CT	Homozygous	27	27	100	0.333333	38.3208	intergenic
NODE_5835_length_31971_cov_23.167089 mapping	1326	SNV	1	A	G	Homozygous	22	22	100	0.363636	39.1364	intergenic
NODE_5835_length_31971_cov_23.167089 mapping	1343	SNV	1	A	T	Homozygous	18	18	100	0.388889	39	intergenic
NODE_5835_length_31971_cov_23.167089 mapping	1390	SNV	1	A	G	Homozygous	10	11	90.9091	0.2	38.6	intergenic
NODE_5835_length_31971_cov_23.167089 mapping	1395	SNV	1	A	G	Heterozygous	5	14	35.7143	0.2	38	intergenic
NODE_5835_length_31971_cov_23.167089 mapping	1402	MNV	2	AG	TA	Heterozygous	5	14	35.7143	0.2	41.3333	intergenic
NODE_5835_length_31971_cov_23.167089 mapping	1403	SNV	1	G	A	Heterozygous	9	14	64.2857	0.111111	40.1667	intergenic
NODE_5835_length_31971_cov_23.167089 mapping	1412	SNV	1	C	A	Heterozygous	6	14	42.8571	0.142857	39	exon
NODE_5835_length_31971_cov_23.167089 mapping	1412	SNV	1	C	T	Heterozygous	6	14	42.8571	0.166667	38.1667	exon
NODE_5835_length_31971_cov_23.167089 mapping	1416	SNV	1	C	A	Homozygous	12	13	92.3077	0.230769	39.8462	exon
NODE_5835_length_31971_cov_23.167089 mapping	1420	SNV	1	T	G	Heterozygous	8	13	61.5385	0.111111	39.7778	exon
NODE_5835_length_31971_cov_23.167089 mapping	1431	Insertion	1	-	A	Heterozygous	3	14	21.4286	0.333333	38.3333	exon
NODE_5835_length_31971_cov_23.167089 mapping	1432	Insertion	3	-	AAG	Heterozygous	4	14	28.5714	0.25	42.6667	exon
NODE_5835_length_31971_cov_23.167089 mapping	1432	SNV	1	T	G	Heterozygous	9	14	64.2857	0.333333	37.75	exon
NODE_5835_length_31971_cov_23.167089 mapping	1454	SNV	1	T	C	Homozygous	9	11	81.8182	0.454545	37.4545	exon
NODE_5835_length_31971_cov_23.167089 mapping	1457	SNV	1	A	C	Homozygous	10	10	100	0.5	36	exon
NODE_5835_length_31971_cov_23.167089 mapping	1515	SNV	1	G	A	Homozygous	10	13	76.9231	0.1	38.4	exon
NODE_5835_length_31971_cov_23.167089 mapping	1519	SNV	1	G	T	Homozygous	5	13	38.4615	0.2	40.2	intron
NODE_5835_length_31971_cov_23.167089 mapping	1521	MNV	2	TC	AT	Homozygous	13	13	100	0.0769231	39.7692	intron
NODE_5835_length_31971_cov_23.167089 mapping	2116	SNV	1	T	C	Homozygous	10	10	100	0.5	36.6	intron
NODE_5835_length_31971_cov_23.167089 mapping	2144	SNV	1	G	A	Heterozygous	6	10	60	0.333333	39.8333	intron
NODE_5835_length_31971_cov_23.167089 mapping	2156	SNV	1	C	T	Homozygous	10	10	100	0.4	35.9	intron
NODE_5835_length_31971_cov_23.167089 mapping	2160	SNV	1	G	A	Homozygous	11	11	100	0.454545	34.5455	intron
NODE_5835_length_31971_cov_23.167089 mapping	2166	Deletion	1	A	-	Homozygous	9	11	81.8182	0.444444	32.7778	intron
NODE_5835_length_31971_cov_23.167089 mapping	2205	SNV	1	C	A	Homozygous	10	10	100	0.5	37.8	exon
NODE_5835_length_31971_cov_23.167089 mapping	8182	SNV	1	A	G	Heterozygous	4	10	40	0.333333	38	intron
NODE_5835_length_31971_cov_23.167089 mapping	8184	SNV	1	G	T	Heterozygous	6	10	60	0.5	36.3333	intron
NODE_8339_length_10035_cov_55.346786 mapping	6217	SNV	1	G	T	Heterozygous	11	16	68.75	0.454545	38	intergenic
NODE_8339_length_10035_cov_55.346786 mapping	6223	SNV	1	A	G	Homozygous	13	13	100	0.384615	38.6923	intergenic
NODE_8339_length_10035_cov_55.346786 mapping	6226	Insertion	1	-	G	Heterozygous	8	13	61.5385	0.5	39.375	intergenic
NODE_8339_length_10035_cov_55.346786 mapping	6227	SNV	1	T	C	Heterozygous	5	13	38.4615	0.2	40	intergenic
NODE_8339_length_10035_cov_55.346786 mapping	6228	Deletion	1	C	-	Heterozygous	8	13	61.5385	0.5	39.875	intergenic
NODE_8339_length_10035_cov_55.346786 mapping	6233	SNV	1	C	A	Homozygous	13	13	100	0.384615	39.2308	intergenic
NODE_8339_length_10035_cov_55.346786 mapping	6241	SNV	1	T	A	Homozygous	12	12	100	0.416667	38.75	intergenic
NODE_8339_length_10035_cov_55.346786 mapping	6258	SNV	1	A	G	Heterozygous	4	12	33.3333	0.5	40.75	intergenic
NODE_8339_length_10035_cov_55.346786 mapping	6260	MNV	2	GT	TG	Heterozygous	4	12	33.3333	0.5	40	intergenic
NODE_8339_length_10035_cov_55.346786 mapping	6261	SNV	1	T	G	Heterozygous	8	12	66.6667	0.5	39.5333	intergenic
NODE_8339_length_10035_cov_55.346786 mapping	6277	Deletion	3	TTA	-	Heterozygous	3	11	27.2727	0.333333	37.3333	intergenic
NODE_8441_length_24378_cov_55.528019 mapping	17229	SNV	1	C	G	Homozygous	12	12	100	0.166667	35.5833	intergenic
NODE_8441_length_24378_cov_55.528019 mapping	17253	Deletion	2	TC	-	Homozygous	11	11	100	0.181818	36.0909	intergenic
NODE_8441_length_24378_cov_55.528019 mapping	17305	SNV	1	T	C	Homozygous	12	14	85.7143	0.0833333	36.6667	intergenic
NODE_8441_length_24378_cov_55.528019 mapping	17308	SNV	1	C	T	Homozygous	12	13	92.3077	0.0833333	37.1667	intergenic
NODE_8441_length_24378_cov_55.528019 mapping	17354	SNV	1	G	A	Homozygous	12	12	100	0.166667	39.6667	intergenic
NODE_8441_length_24378_cov_55.528019 mapping	17356	SNV	1	A	T	Homozygous	12	12	100	0.166667	40	intergenic
NODE_8441_length_24378_cov_55.528019 mapping	17366	SNV	1	T	C	Homozygous	14	14	100	0.214286	38	intergenic
NODE_8441_length_24378_cov_55.528019 mapping	17370	Deletion	1	C	-	Homozygous	14	14	100	0.214286	36.3571	intergenic
NODE_8441_length_24378_cov_55.528019 mapping	17383	SNV	1	T	G	Homozygous	13	13	100	0.230769	36.3077	intergenic
NODE_8441_length_24378_cov_55.528019 mapping	17387	SNV	1	T	C	Homozygous	13	13	100	0.230769	37	intergenic
NODE_8441_length_24378_cov_55.528019 mapping	17502	SNV	1	A	G	Homozygous	15	15	100	0.133333	37.8667	intergenic
NODE_8441_length_24378_cov_55.528019 mapping	17510	SNV	1	G	A	Homozygous	17	17	100	0.117647	38.7059	intergenic
NODE_8441_length_24378_cov_55.528019 mapping	17523	SNV	1	A	C	Homozygous	17	17	100	0.117647	38.1176	intergenic
NODE_8441_length_24378_cov_55.528019 mapping	17532	SNV	1	A	G	Homozygous	15	15	100	0.133333	38.2	intergenic
NODE_8441_length_24378_cov_55.528019 mapping	17534	SNV	1	G	A	Homozygous	15	15	100	0.133333	38.6667	intergenic
NODE_8441_length_24378_cov_55.528019 mapping	17557	SNV	1	G	A	Homozygous	11	11	100	0.181818	39.1818	intergenic
NODE_8441_length_24378_cov_55.528019 mapping	18130	SNV	1	C	T	Homozygous	10	10	100	0.3	38.2	intergenic
NODE_8441_length_24378_cov_55.528019 mapping	18134	Insertion	1	-	T	Homozygous	8	10	80	0.25	37.875	intergenic
NODE_8557_length_5691_cov_49.150238 mapping	1787	SNV	1	A	C	Heterozygous	5	10	50	0.4	40	intergenic
NODE_8559_length_2637_cov_56.653774 mapping	743	Deletion	2	TT	-	Heterozygous	5	10	50	0.2	39.2	intergenic
NODE_8724_length_36297_cov_9.388655 mapping	16241	SNV	1	A	G	Homozygous	12	12	100	0.416667	39.0833	exon
NODE_8803_length_25205_cov_60.800240 mapping	8189	SNV	1	T	C	Homozygous	15	15	100	0.4	38.8667	intron
NODE_8803_length_25205_cov_60.800240 mapping	8224	SNV	1	C	T	Homozygous	10	10	100	0.4	34.1	intron
NODE_939_length_23996_cov_23.212618 mapping	1878	SNV	1	C	T	Homozygous	11	11	100	0.181818	38.7273	intergenic
NODE_939_length_23996_cov_23.212618 mapping	1897	SNV	1	T	A	Homozygous	11	11	100	0.272727	38.5455	intergenic
NODE_939_length_23996_cov_23.212618 mapping	1921	SNV	1	T	G	Homozygous	13	13	100	0.461538	36.3077	intergenic
NODE_939_length_23996_cov_23.212618 mapping	1938	SNV	1	A	G	Homozygous	14	14	100	0.428571	36.7143	intergenic
NODE_939_length_23996_cov_23.212618 mapping	1947	SNV	1	C	T	Homozygous	14	15	93.3333	0.428571	35.9286	intergenic
NODE_939_length_23996_cov_23.212618 mapping	1963	SNV	1	A	G	Homozygous	13	13	100	0.461538	39.1538	intergenic
NODE_939_length_23996_cov_23.212618 mapping	1995	SNV	1	G	A	Homozygous	11	11	100	0.363636	38	intergenic
NODE_939_length_23996_cov_23.212618 mapping	2005	SNV	1	G	T	Homozygous	10	10	100	0.3	39.1	intergenic
NODE_939_length_23996_cov_23.212618 mapping	2013	SNV	1	C	T	Homozygous	11	11	100	0.363636	38.3636	intergenic
NODE_939_length_23996_cov_23.212618 mapping	13013	SNV	1	G	A	Homozygous	10	10	100	0.2	40.1	intergenic
NODE_939_length_23996_cov_23.212618 mapping	13017	SNV	1	G	T	Homozygous	10	10	100	0.2	39.2	intergenic
NODE_939_length_23996_cov_23.212618 mapping	16645	SNV	1	A	T	Homozygous	10	10	100	0.4	37.6	intron
NODE_939_length_23996_cov_23.212618 mapping	16647	SNV	1	T	C	Homozygous	10	10	100	0.4	37.4	intron
NODE_939_length_23996_cov_23.212618 mapping	16778	SNV	1	T	C	Homozygous	10	10	100	0.4	33	intron
NODE_939_length_23996_cov_23.212618 mapping	16781	Deletion	1	T	-	Homozygous	9	10	90	0.333333	32.5556	intron
NODE_939_length_23996_cov_23.212618 mapping	16836	SNV	1	C	G	Homozygous	10	10	100	0.4	37.3	intron
NODE_9047_length_11147_cov_58.234142 mapping	325	SNV	1	T	G	Homozygous	11	11	100	0.272727	40	intergenic
NODE_9047_length_11147_cov_58.234142 mapping	330	SNV	1	A	T	Homozygous	11	11	100	0.272727	38.7273	intergenic
NODE_9047_length_11147_cov_58.234142 mapping	347	Insertion	1	-	A	Homozygous	12	13	92.3077	0.25	39	intergenic
NODE_9047_length_11147_cov_58.234142 mapping	352	SNV	1	C	G	Homozygous	13	13	100	0.307692	37.3077	intergenic
NODE_9047_length_11147_cov_58.234142 mapping	361	SNV	1	G	T	Homozygous	15	15	100	0.333333	37.0667	intergenic
NODE_9047_length_11147_cov_58.234142 mapping	393	SNV	1	G	C	Homozygous	11	11	100	0.363636	38.8182	intergenic
NODE_9047_length_11147_cov_58.234142 mapping	514	Deletion	1	A	-	Homozygous	11	12	91.6667	0.272727	37.2727	intergenic
NODE_9047_length_11147_cov_58.234142 mapping	520	SNV	1	A	G	Homozygous	11	11	100	0.272727	37.2727	intergenic
NODE_9047_length_11147_cov_58.234142 mapping	536	SNV	1	C	G	Homozygous	11	11	100	0.272727	36.9091	intergenic
NODE_9047_length_11147_cov_58.234142 mapping	563	SNV	1	A	G	Homozygous	12	12	100	0.5	37.8333	intergenic
NODE_9047_length_11147_cov_58.234142 mapping	571	MNV	2	TG	CA	Homozygous	11	11	100	0.454545	37.9091	intergenic
NODE_9047_length_11147_cov_58.234142 mapping	576	SNV	1	T	A	Homozygous	11	11	100	0.454545	38.6364	intergenic
NODE_9047_length_11147_cov_58.234142 mapping	629	SNV	1	C	A	Homozygous	10	10	100	0.2	38.6	intergenic
NODE_9047_length_11147_cov_58.234142 mapping	768	SNV	1	T	C	Homozygous	10	10	100	0.3	38.7	intergenic
NODE_9047_length_11147_cov_58.234142 mapping	2679	SNV	1	A	T	Homozygous	12	12	100	0.5	37.6667	exon
NODE_9047_length_11147_cov_58.234142 mapping	2690	MNV	2	TT	CG	Homozygous	11	11	100	0.454545	38.7727	exon
NODE_9047_length_11147_cov_58.234142 mapping	2702	MNV	2	AA	GC	Homozygous	11	11	100	0.454545	35.5909	exon
NODE_9047_length_11147_cov_58.234142 mapping	2710	SNV	1	T	C	Homozygous	10	10	100	0.4	38.4	exon
NODE_9047_length_11147_cov_58.234142 mapping	2725	SNV	1	T	C	Homozygous	12	12	100	0.5	39.3333	exon
NODE_9047_length_11147_cov_58.234142 mapping	2748	SNV	1	T	G	Homozygous	10	10	100	0.4	36.3	exon
NODE_9047_length_11147_cov_58.234142 mapping	3077	SNV	1	T	C	Homozygous	10	10	100	0.4	36.1	intron
NODE_9047_length_11147_cov_58.234142 mapping	3122	SNV	1	A	G	Homozygous	10	10	100	0.4	37	exon
NODE_9047_length_11147_cov_58.234142 mapping	3269	SNV	1	T	C	Homozygous	10	10	100	0.4	35	intron
NODE_9047_length_11147_cov_58.234142 mapping	3273	SNV	1	T	A	Homozygous	10	10	100	0.4	37.8	intron
NODE_9047_length_11147_cov_58.234142 mapping	3287	SNV	1	C	A	Homozygous	11	12	91.6667	0.454545	37.7273	intron
NODE_9047_length_11147_cov_58.234142 mapping	3292	SNV	1	C	T	Homozygous	13	13	100	0.461538	35.3846	intron
NODE_9047_length_11147_cov_58.234142 mapping	3303	SNV	1	A	C	Homozygous	15	15	100	0.466667	38.3333	intron
NODE_9047_length_11147_cov_58.234142 mapping	3310	MNV	2	TA	GG	Homozygous	13	13	100	0.461538	38.8077	intron
NODE_9047_length_11147_cov_58.234142 mapping	3331	SNV	1	T	G	Homozygous	11	11	100	0.454545	38	intron
NODE_9155_length_2492_cov_44.657303 mapping	2111	SNV	1	A	T	Homozygous	11	11	100	0.272727	37.7273	intergenic
NODE_9155_length_2492_cov_44.657303 mapping	2127	SNV	1	C	A	Homozygous	11	11	100	0.272727	35.0909	intergenic
NODE_9155_length_2492_cov_44.657303 mapping	2144	SNV	1	A	G	Homozygous	11	11	100	0.272727	39.5455	intergenic
NODE_9155_length_2492_cov_44.657303 mapping	2148	SNV	1	T	A	Homozygous	11	11	100	0.272727	39.1818	intergenic
NODE_9155_length_2492_cov_44.657303 mapping	2159	SNV	1	G	A	Homozygous	10	10	100	0.3	38	intergenic
NODE_9577_length_3523_cov_48.111835 mapping	408	SNV	1	G	T	Homozygous	10	10	100	0.4	38.7	intergenic
NODE_9577_length_3523_cov_48.111835 mapping	415	SNV	1	T	C	Homozygous	10	10	100	0.4	38.7	intergenic
NODE_9577_length_3523_cov_48.111835 mapping	425	SNV	1	T	C	Homozygous	10	10	100	0.4	37.2	intergenic
NODE_9577_length_3523_cov_48.111835 mapping	429	SNV	1	G	A	Homozygous	10	10	100	0.4	38.1	intergenic
NODE_9936_length_11918_cov_52.150780 mapping	5640	SNV	1	G	A	Homozygous	10	10	100	0.272727	39.3636	intergenic
NODE_9936_length_11918_cov_52.150780 mapping	5643	SNV	1	C	T	Homozygous	9	10	90	0.222222	36.7778	intergenic
NODE_9936_length_11918_cov_52.150780 mapping	7771	SNV	1	A	G	Homozygous	10	10	100	0.2	38	intergenic
NODE_9936_length_11918_cov_52.150780 mapping	7776	SNV	1	A	G	Homozygous	10	10	100	0.2	38.1	intergenic
NODE_9936_length_11918_cov_52.150780 mapping	9499	SNV	1	T	G	Homozygous	10	10	100	0.4	38.6	intergenic
NODE_10049_length_1116_cov_3407.829834 mapping	278	MNV	2	GA	TC	Homozygous	218	218	100	0.426606	37.2431	intergenic
NODE_10105_length_7981_cov_77.334419 mapping	1741	SNV	1	C	T	Heterozygous	5	10	50	0.4	30.6	intergenic
NODE_10105_length_7981_cov_77.334419 mapping	1836	SNV	1	T	C	Heterozygous	4	10	40	0.25	36	intergenic
NODE_10105_length_7981_cov_77.334419 mapping	1837	SNV	1	T	C	Heterozygous	5	11	45.4545	0.4	39	intergenic
NODE_10105_length_7981_cov_77.334419 mapping	1840	SNV	1	A	T	Heterozygous	5	12	41.6667	0.2	36	intergenic
NODE_10105_length_7981_cov_77.334419 mapping	1844	SNV	1	T	A	Heterozygous	5	12	41.6667	0.2	38.2	intergenic
NODE_10105_length_7981_cov_77.334419 mapping	1847	SNV	1	G	A	Heterozygous	5	14	35.7143	0.2	37.6	intergenic
NODE_10105_length_7981_cov_77.334419 mapping	1855	SNV	1	A	T	Heterozygous	5	17	29.4118	0.2	37.8	intergenic
NODE_10105_length_7981_cov_77.334419 mapping	1862	MNV	2	GG	AA	Heterozygous	8	18	44.4444	0.5	37.8125	intergenic
NODE_10105_length_7981_cov_77.334419 mapping	1863	SNV	1	G	A	Heterozygous	10	18	55.5556	0.4	36.55	intergenic
NODE_10105_length_7981_cov_77.334419 mapping	1871	SNV	1	T	C	Heterozygous	5	18	27.7778	0.2	35.2	intergenic
NODE_10105_length_7981_cov_77.334419 mapping	1874	SNV	1	G	T	Heterozygous	5	18	27.7778	0.2	37	intergenic
NODE_10105_length_7981_cov_77.334419 mapping	1878	SNV	1	A	T	Heterozygous	8	18	44.4444	0.5	39.25	intergenic
NODE_10105_length_7981_cov_77.334419 mapping	1883	SNV	1	G	T	Heterozygous	5	18	27.7778	0.4	38.8	intergenic
NODE_10105_length_7981_cov_77.334419 mapping	1897	SNV	1	A	T	Heterozygous	13	16	81.25	0.461538	38.9231	intergenic
NODE_10105_length_7981_cov_77.334419 mapping	1897	SNV	1	A	C	Heterozygous	3	16	18.75	0.333333	37	intergenic
NODE_10105_length_7981_cov_77.334419 mapping	1903	SNV	1	G	A	Heterozygous	5	16	31.25	0.4	38.8	intergenic
NODE_10105_length_7981_cov_77.334419 mapping	1903	MNV	2	GC	AT	Heterozygous	3	16	18.75	0.333333	30.5	intergenic
NODE_10105_length_7981_cov_77.334419 mapping	1904	SNV	1	C	T	Heterozygous	5	16	31.25	0.4	35.9	intergenic
NODE_10105_length_7981_cov_77.334419 mapping	1913	SNV	1	G	T	Heterozygous	5	13	38.4615	0.4	39	intergenic
NODE_10105_length_7981_cov_77.334419 mapping	1919	SNV	1	G	T	Heterozygous	3	15	20	0.333333	36	intergenic
NODE_10105_length_7981_cov_77.334419 mapping	1922	Insertion	1	-	G	Heterozygous	3	14	21.4286	0.333333	32	intergenic
NODE_10105_length_7981_cov_77.334419 mapping	1928	SNV	1	G	A	Homozygous	11	11	100	0.363636	38.2727	intergenic
NODE_10105_length_7981_cov_77.334419 mapping	1930	SNV	1	G	C	Heterozygous	5	11	45.4545	0.4	38.6	intergenic
NODE_10105_length_7981_cov_77.334419 mapping	1932	SNV	1	A	C	Heterozygous	4	10	40	0.5	40	intergenic
NODE_10105_length_7981_cov_77.334419 mapping	1955	SNV	1	A	T	Heterozygous	3	10	30	0.333333	38.3333	intergenic
NODE_10105_length_7981_cov_77.334419 mapping	1959	SNV	1	C	G	Heterozygous	7	10	70	0.142857	37.7143	intergenic
NODE_10105_length_7981_cov_77.334419 mapping	1985	SNV	1	C	T	Heterozygous	12	15	80	0.166667	38.0833	intergenic
NODE_10105_length_7981_cov_77.334419 mapping	1989	Deletion	1	A	-	Heterozygous	10	15	66.6667	0.1	39.6	intergenic
NODE_10105_length_7981_cov_77.334419 mapping	1991	SNV	1	C	G	Heterozygous	8	15	53.3333	0.125	40.375	intergenic
NODE_10105_length_7981_cov_77.334419 mapping	2013	SNV	1	T	C	Homozygous	15	18	83.3333	0.2	37.6667	intergenic
NODE_10105_length_7981_cov_77.334419 mapping	2016	SNV	1	T	A	Heterozygous	10	17	58.8235	0.1	38.9	intergenic
NODE_10105_length_7981_cov_77.334419 mapping	2016	SNV	1	T	G	Heterozygous	7	17	41.1765	0.428571	38.4286	intergenic
NODE_10105_length_7981_cov_77.334419 mapping	2024	SNV	1	C	A	Homozygous	18	18	100	0.277778	36	intergenic
NODE_10105_length_7981_cov_77.334419 mapping	2026	SNV	1	T	C	Homozygous	18	18	100	0.277778	36.1667	intergenic
NODE_10105_length_7981_cov_77.334419 mapping	2030	SNV	1	T	C	Heterozygous	17	23	73.913	0.176471	36.3529	intergenic
NODE_10105_length_7981_cov_77.334419 mapping	2041	SNV	1	G	T	Heterozygous	14	21	66.6667	0.214286	35.2857	intergenic
NODE_10105_length_7981_cov_77.334419 mapping	2045	SNV	1	G	C	Heterozygous	5	21	23.8095	0.2	37.4	intergenic
NODE_10105_length_7981_cov_77.334419 mapping	2075	SNV	1	G	A	Homozygous	12	17	70.5882	0.333333	36.5833	exon
NODE_10105_length_7981_cov_77.334419 mapping	2086	SNV	1	T	A	Homozygous	16	16	100	0.375	37.75	exon
NODE_10105_length_7981_cov_77.334419 mapping	2098	SNV	1	T	G	Heterozygous	9	17	52.9412	0.444444	35.3333	exon
NODE_10105_length_7981_cov_77.334419 mapping	2109	SNV	1	A	T	Heterozygous	7	22	31.8182	0.142857	39.5714	exon
NODE_10105_length_7981_cov_77.334419 mapping	2122	SNV	1	C	T	Homozygous	20	20	100	0.47619	39.1429	exon
NODE_10105_length_7981_cov_77.334419 mapping	2124	SNV	1	G	A	Heterozygous	9	21	42.8571	0.2	39.5	exon
NODE_10105_length_7981_cov_77.334419 mapping	2130	MNV	2	CC	AA	Homozygous	22	22	100	0.5	38.3182	exon
NODE_10105_length_7981_cov_77.334419 mapping	2133	SNV	1	G	A	Heterozygous	9	25	36	0.2	39.3	exon
NODE_10105_length_7981_cov_77.334419 mapping	2155	SNV	1	G	T	Heterozygous	18	29	62.069	0.388889	38.6111	exon
NODE_10105_length_7981_cov_77.334419 mapping	2165	SNV	1	C	T	Homozygous	28	28	100	0.482759	38.9655	exon
NODE_10105_length_7981_cov_77.334419 mapping	2167	SNV	1	T	G	Heterozygous	16	28	57.1429	0.4375	39.375	exon
NODE_10105_length_7981_cov_77.334419 mapping	2177	MNV	2	AC	CT	Heterozygous	7	26	26.9231	0.285714	38.9286	exon
NODE_10105_length_7981_cov_77.334419 mapping	2178	SNV	1	C	T	Heterozygous	19	26	73.0769	0.368421	38.6316	exon
NODE_10105_length_7981_cov_77.334419 mapping	2180	SNV	1	G	A	Heterozygous	7	26	26.9231	0.25	36.75	exon
NODE_10105_length_7981_cov_77.334419 mapping	2190	MNV	2	TT	CG	Heterozygous	16	26	61.5385	0.4375	38.9032	exon
NODE_10105_length_7981_cov_77.334419 mapping	2191	SNV	1	T	G	Heterozygous	2	26	7.69231	0.5	30.5	exon
NODE_10105_length_7981_cov_77.334419 mapping	2197	SNV	1	C	T	Homozygous	21	21	100	0.428571	38.1429	exon
NODE_10105_length_7981_cov_77.334419 mapping	2203	SNV	1	G	A	Homozygous	18	18	100	0.388889	38.3333	exon
NODE_10105_length_7981_cov_77.334419 mapping	2205	SNV	1	G	A	Homozygous	18	18	100	0.388889	39.6667	exon
NODE_10105_length_7981_cov_77.334419 mapping	2208	SNV	1	T	G	Homozygous	16	18	88.8889	0.4375	38.375	exon
NODE_10105_length_7981_cov_77.334419 mapping	2210	SNV	1	T	A	Homozygous	15	18	83.3333	0.466667	38.6	exon
NODE_10105_length_7981_cov_77.334419 mapping	2234	SNV	1	T	C	Homozygous	14	14	100	0.357143	38.6429	exon
NODE_10105_length_7981_cov_77.334419 mapping	2256	Deletion	1	A	-	Homozygous	17	18	94.4444	0.294118	37.9412	exon
NODE_10105_length_7981_cov_77.334419 mapping	2265	SNV	1	T	A	Homozygous	18	18	100	0.277778	37.2222	exon
NODE_10105_length_7981_cov_77.334419 mapping	2280	SNV	1	G	A	Homozygous	18	18	100	0.333333	39.0556	exon
NODE_10105_length_7981_cov_77.334419 mapping	2289	SNV	1	C	T	Heterozygous	9	21	42.8571	0.333333	37.4444	exon
NODE_10105_length_7981_cov_77.334419 mapping	2303	SNV	1	T	C	Homozygous	16	16	100	0.375	37.625	exon
NODE_10105_length_7981_cov_77.334419 mapping	2305	SNV	1	T	C	Heterozygous	11	16	68.75	0.363636	37.5455	exon
NODE_10105_length_7981_cov_77.334419 mapping	2306	SNV	1	G	A	Heterozygous	4	17	23.5294	0.25	39	exon
NODE_10105_length_7981_cov_77.334419 mapping	2328	SNV	1	T	C	Homozygous	21	21	100	0.428571	36.7143	exon
NODE_10105_length_7981_cov_77.334419 mapping	2331	SNV	1	C	T	Homozygous	21	21	100	0.428571	36.7619	exon
NODE_10105_length_7981_cov_77.334419 mapping	2355	SNV	1	A	C	Homozygous	15	15	100	0.4	38.3333	exon
NODE_10105_length_7981_cov_77.334419 mapping	2364	SNV	1	C	T	Heterozygous	9	14	64.2857	0.333333	39.8889	exon
NODE_10105_length_7981_cov_77.334419 mapping	2370	SNV	1	A	G	Heterozygous	9	14	64.2857	0.333333	39.6667	exon
NODE_10105_length_7981_cov_77.334419 mapping	2372	SNV	1	T	C	Heterozygous	3	14	21.4286	0.333333	38.6667	exon
NODE_10105_length_7981_cov_77.334419 mapping	2383	SNV	1	A	G	Homozygous	9	12	75	0.333333	39.7778	exon
NODE_10105_length_7981_cov_77.334419 mapping	2398	SNV	1	C	A	Homozygous	10	10	100	0.4	39.5	exon
NODE_10105_length_7981_cov_77.334419 mapping	2488	SNV	1	G	A	Heterozygous	3	11	27.2727	0.333333	39	exon
NODE_10105_length_7981_cov_77.334419 mapping	2492	SNV	1	A	G	Heterozygous	9	14	64.2857	0.444444	38	exon
NODE_10105_length_7981_cov_77.334419 mapping	2500	SNV	1	C	G	Heterozygous	6	16	37.5	0.5	36.3333	exon
NODE_10105_length_7981_cov_77.334419 mapping	2504	SNV	1	C	T	Heterozygous	11	16	68.75	0.454545	38.3636	exon
NODE_10105_length_7981_cov_77.334419 mapping	2508	Deletion	3	TAT	-	Heterozygous	5	17	29.4118	0.4	34.8	exon
NODE_10105_length_7981_cov_77.334419 mapping	2512	SNV	1	A	G	Heterozygous	6	17	35.2941	0.333333	36	exon
NODE_10105_length_7981_cov_77.334419 mapping	2535	SNV	1	C	G	Heterozygous	9	20	45	0.333333	35.7778	exon
NODE_10105_length_7981_cov_77.334419 mapping	2536	SNV	1	C	G	Heterozygous	5	19	26.3158	0.4	34.8	exon
NODE_10105_length_7981_cov_77.334419 mapping	2547	SNV	1	A	T	Heterozygous	9	19	47.3684	0.333333	34.4444	exon
NODE_10105_length_7981_cov_77.334419 mapping	2576	SNV	1	T	A	Heterozygous	6	13	46.1538	0.333333	39.6667	exon
NODE_10105_length_7981_cov_77.334419 mapping	2580	SNV	1	C	A	Homozygous	11	12	91.6667	0.454545	37.3636	exon
NODE_10105_length_7981_cov_77.334419 mapping	2584	SNV	1	C	T	Homozygous	10	10	100	0.5	36.5	exon
NODE_10105_length_7981_cov_77.334419 mapping	2650	Deletion	1	G	-	Heterozygous	4	10	40	0.5	40	exon
NODE_10105_length_7981_cov_77.334419 mapping	2652	SNV	1	A	C	Heterozygous	4	10	40	0.5	39.5	exon
NODE_10105_length_7981_cov_77.334419 mapping	2654	MNV	2	AT	GC	Heterozygous	4	10	40	0.5	38.875	exon
NODE_10105_length_7981_cov_77.334419 mapping	2655	SNV	1	T	C	Heterozygous	6	10	60	0.333333	36.3333	exon
NODE_10105_length_7981_cov_77.334419 mapping	2661	SNV	1	T	C	Homozygous	10	10	100	0.4	37.3	exon
NODE_10105_length_7981_cov_77.334419 mapping	2665	SNV	1	C	T	Heterozygous	5	12	41.6667	0.4	38	exon
NODE_10105_length_7981_cov_77.334419 mapping	2667	SNV	1	G	T	Heterozygous	6	12	50	0.5	35.8333	exon
NODE_10105_length_7981_cov_77.334419 mapping	2671	SNV	1	A	T	Homozygous	12	12	100	0.5	37.25	exon
NODE_10105_length_7981_cov_77.334419 mapping	2679	SNV	1	C	T	Homozygous	13	14	92.8571	0.384615	36	exon
NODE_10105_length_7981_cov_77.334419 mapping	2715	SNV	1	A	G	Heterozygous	5	11	45.4545	0.4	38.2	exon
NODE_10105_length_7981_cov_77.334419 mapping	2718	SNV	1	C	T	Homozygous	10	10	100	0.2	37.1	exon
NODE_10105_length_7981_cov_77.334419 mapping	2738	MNV	2	TT	AC	Homozygous	11	11	100	0.272727	36.5909	intron
NODE_10105_length_7981_cov_77.334419 mapping	2741	SNV	1	G	A	Homozygous	11	11	100	0.272727	37.0909	intron
NODE_10105_length_7981_cov_77.334419 mapping	2747	SNV	1	T	G	Homozygous	6	12	50	0.5	39.8333	intron
NODE_10105_length_7981_cov_77.334419 mapping	2810	Insertion	1	-	A	Homozygous	9	12	75	0.333333	35.8889	intron
NODE_10105_length_7981_cov_77.334419 mapping	3874	Deletion	3	CTT	-	Heterozygous	4	15	26.6667	0.25	35.75	intron
NODE_10105_length_7981_cov_77.334419 mapping	3886	SNV	1	T	C	Heterozygous	4	16	25	0.5	38.25	intron
NODE_10105_length_7981_cov_77.334419 mapping	3902	SNV	1	C	G	Heterozygous	9	19	47.3684	0.111111	38.4444	intron
NODE_10105_length_7981_cov_77.334419 mapping	3978	SNV	1	C	T	Homozygous	18	18	100	0.238095	35.8571	exon
NODE_10105_length_7981_cov_77.334419 mapping	3993	SNV	1	G	T	Heterozygous	5	20	25	0.4	39.8	exon
NODE_10105_length_7981_cov_77.334419 mapping	4002	SNV	1	G	T	Heterozygous	15	19	78.9474	0.2	37.7333	exon
NODE_10105_length_7981_cov_77.334419 mapping	4002	SNV	1	G	A	Heterozygous	4	19	21.0526	0.25	37.25	exon
NODE_10105_length_7981_cov_77.334419 mapping	4008	SNV	1	T	C	Heterozygous	11	20	55	0.272727	36.3636	exon
NODE_10105_length_7981_cov_77.334419 mapping	4018	SNV	1	T	A	Homozygous	15	15	100	0.2	36.4667	exon
NODE_10105_length_7981_cov_77.334419 mapping	4022	SNV	1	T	C	Heterozygous	12	15	80	0.0833333	34.9167	exon
NODE_10105_length_7981_cov_77.334419 mapping	4032	SNV	1	T	C	Homozygous	9	11	81.8182	0.111111	38	intron
NODE_10105_length_7981_cov_77.334419 mapping	7668	SNV	1	A	G	Heterozygous	3	10	30	0.333333	38	intergenic
NODE_10105_length_7981_cov_77.334419 mapping	7679	SNV	1	T	C	Heterozygous	7	10	70	0.285714	40.1429	intergenic
NODE_10105_length_7981_cov_77.334419 mapping	7683	SNV	1	A	C	Heterozygous	3	10	30	0.333333	39.6667	intergenic
NODE_10205_length_4810_cov_62.322662 mapping	2851	SNV	1	G	A	Homozygous	10	10	100	0.3	34	intergenic
NODE_10205_length_4810_cov_62.322662 mapping	3040	SNV	1	G	A	Heterozygous	7	13	53.8462	0.428571	35.5714	intergenic
NODE_10205_length_4810_cov_62.322662 mapping	3042	SNV	1	A	C	Homozygous	9	13	69.2308	0.444444	32.1111	intergenic
NODE_10205_length_4810_cov_62.322662 mapping	3052	SNV	1	A	G	Heterozygous	3	14	21.4286	0.333333	35.6667	intergenic
NODE_10205_length_4810_cov_62.322662 mapping	3058	SNV	1	A	G	Heterozygous	8	14	57.1429	0.25	37.375	intergenic
NODE_10205_length_4810_cov_62.322662 mapping	3104	SNV	1	C	T	Heterozygous	3	10	30	0.333333	38.6667	intergenic
NODE_10205_length_4810_cov_62.322662 mapping	3105	SNV	1	T	A	Heterozygous	3	10	30	0.333333	33.3333	intergenic
NODE_10205_length_4810_cov_62.322662 mapping	3134	SNV	1	T	C	Homozygous	9	10	90	0.444444	37.5556	intergenic
NODE_10205_length_4810_cov_62.322662 mapping	3138	SNV	1	A	C	Homozygous	9	12	75	0.333333	37.1111	intergenic
NODE_10205_length_4810_cov_62.322662 mapping	3146	SNV	1	T	A	Homozygous	7	12	58.3333	0.285714	39.8571	intergenic
NODE_10205_length_4810_cov_62.322662 mapping	3149	SNV	1	G	C	Heterozygous	3	12	25	0.333333	39	intergenic
NODE_10205_length_4810_cov_62.322662 mapping	3162	SNV	1	G	A	Homozygous	8	12	66.6667	0.375	39	intergenic
NODE_10205_length_4810_cov_62.322662 mapping	3164	SNV	1	T	G	Homozygous	12	12	100	0.416667	38.1667	intergenic
NODE_10205_length_4810_cov_62.322662 mapping	3404	SNV	1	C	T	Homozygous	17	17	100	0.117647	39.4706	intergenic
NODE_10205_length_4810_cov_62.322662 mapping	3409	SNV	1	G	A	Heterozygous	5	18	27.7778	0.2	40.2	intergenic
NODE_10205_length_4810_cov_62.322662 mapping	3411	SNV	1	G	A	Homozygous	11	18	61.1111	0.181818	39.3636	intergenic
NODE_10205_length_4810_cov_62.322662 mapping	3455	SNV	1	C	T	Heterozygous	5	19	26.3158	0.4	38.4	intergenic
NODE_10205_length_4810_cov_62.322662 mapping	3456	SNV	1	T	A	Heterozygous	5	19	26.3158	0.2	35.2	intergenic
NODE_10205_length_4810_cov_62.322662 mapping	3476	Deletion	1	T	-	Heterozygous	6	16	37.5	0.333333	36.1667	intergenic
NODE_10205_length_4810_cov_62.322662 mapping	3490	SNV	1	C	G	Heterozygous	3	12	25	0.333333	37	intergenic
NODE_10205_length_4810_cov_62.322662 mapping	3493	Deletion	1	T	-	Heterozygous	3	12	25	0.333333	36.6667	intergenic
NODE_10205_length_4810_cov_62.322662 mapping	3497	SNV	1	C	G	Heterozygous	4	12	33.3333	0.5	37.25	intergenic
NODE_10205_length_4810_cov_62.322662 mapping	3498	SNV	1	T	G	Heterozygous	3	12	25	0.333333	39.3333	intergenic
NODE_10205_length_4810_cov_62.322662 mapping	3506	Insertion	1	-	A	Heterozygous	3	12	25	0.333333	38.6667	intergenic
NODE_10205_length_4810_cov_62.322662 mapping	3511	SNV	1	T	A	Heterozygous	3	12	25	0.333333	39.6667	intergenic
NODE_10205_length_4810_cov_62.322662 mapping	3514	Deletion	1	T	-	Heterozygous	3	11	27.2727	0.333333	37	intergenic
NODE_10205_length_4810_cov_62.322662 mapping	3517	MNV	2	TT	GC	Heterozygous	3	11	27.2727	0.333333	38.1667	intergenic
NODE_10205_length_4810_cov_62.322662 mapping	3518	SNV	1	T	C	Heterozygous	8	11	72.7273	0.375	38.5625	intergenic
NODE_10205_length_4810_cov_62.322662 mapping	3533	SNV	1	A	G	Heterozygous	4	14	28.5714	0.25	39.5	intergenic
NODE_10205_length_4810_cov_62.322662 mapping	3552	SNV	1	C	A	Heterozygous	10	13	76.9231	0.3	37.5	intergenic
NODE_10205_length_4810_cov_62.322662 mapping	3558	SNV	1	C	T	Homozygous	14	14	100	0.285714	38.5714	intergenic
NODE_10205_length_4810_cov_62.322662 mapping	3562	SNV	1	C	T	Heterozygous	14	19	73.6842	0.285714	38.4286	intergenic
NODE_10205_length_4810_cov_62.322662 mapping	3567	SNV	1	T	A	Heterozygous	5	20	25	0.4	40	intergenic
NODE_10205_length_4810_cov_62.322662 mapping	3569	SNV	1	T	C	Homozygous	12	17	70.5882	0.25	37.8333	intergenic
NODE_10205_length_4810_cov_62.322662 mapping	3576	SNV	1	G	T	Heterozygous	6	18	33.3333	0.166667	35.3333	intergenic
NODE_10205_length_4810_cov_62.322662 mapping	3588	SNV	1	G	A	Heterozygous	5	17	29.4118	0.2	38.4	intergenic
NODE_10205_length_4810_cov_62.322662 mapping	3593	Insertion	1	-	G	Homozygous	15	16	93.75	0.133333	39.4	intergenic
NODE_10205_length_4810_cov_62.322662 mapping	3594	SNV	1	C	A	Heterozygous	5	15	33.3333	0.2	40.4	intergenic
NODE_10205_length_4810_cov_62.322662 mapping	3596	MNV	2	TG	CA	Homozygous	15	15	100	0.133333	39.4667	intergenic
NODE_10232_length_1830_cov_74.618576 mapping	326	SNV	1	T	C	Homozygous	13	13	100	0.461538	37.8462	intergenic
NODE_10232_length_1830_cov_74.618576 mapping	329	SNV	1	A	G	Homozygous	13	13	100	0.461538	37.9231	intergenic
NODE_10232_length_1830_cov_74.618576 mapping	334	SNV	1	C	T	Homozygous	14	14	100	0.5	36	intergenic
NODE_10232_length_1830_cov_74.618576 mapping	338	SNV	1	T	C	Homozygous	14	14	100	0.428571	35.5	intergenic
NODE_10232_length_1830_cov_74.618576 mapping	343	SNV	1	T	C	Homozygous	14	14	100	0.428571	36.7857	intergenic
NODE_10232_length_1830_cov_74.618576 mapping	345	SNV	1	G	T	Homozygous	14	14	100	0.428571	34	intergenic
NODE_10232_length_1830_cov_74.618576 mapping	566	SNV	1	C	T	Heterozygous	7	10	70	0.285714	37	intergenic
NODE_10264_length_9512_cov_49.034061 mapping	8790	Insertion	1	-	T	Heterozygous	5	12	41.6667	0.4	32.2	intergenic
NODE_10264_length_9512_cov_49.034061 mapping	8790	SNV	1	A	T	Heterozygous	4	12	33.3333	0.25	36.75	intergenic
NODE_10264_length_9512_cov_49.034061 mapping	8792	SNV	1	T	A	Heterozygous	4	12	33.3333	0.25	37.75	intergenic
NODE_10264_length_9512_cov_49.034061 mapping	8796	SNV	1	T	A	Homozygous	8	12	66.6667	0.375	38.375	intergenic
NODE_10264_length_9512_cov_49.034061 mapping	8802	Deletion	2	AA	-	Heterozygous	6	12	50	0.333333	35.6667	intergenic
NODE_10264_length_9512_cov_49.034061 mapping	8802	MNV	2	AA	TT	Heterozygous	3	12	25	0	40	intergenic
NODE_10264_length_9512_cov_49.034061 mapping	8803	Replacement	2	A	TT	Heterozygous	3	12	25	0.333333	39.8889	intergenic
NODE_10264_length_9512_cov_49.034061 mapping	8823	SNV	1	T	A	Homozygous	10	12	83.3333	0.454545	39.1818	intergenic
NODE_10264_length_9512_cov_49.034061 mapping	8829	SNV	1	G	A	Homozygous	11	11	100	0.5	36.6667	intergenic
NODE_10264_length_9512_cov_49.034061 mapping	8833	MNV	3	AGT	GAA	Homozygous	11	11	100	0.454545	36.4848	intergenic
NODE_10287_length_1339_cov_60.631813 mapping	607	SNV	1	A	T	Homozygous	10	11	90.9091	0.4	33.2	intergenic
NODE_10217_length_1620_cov_3930.368408 mapping	638	SNV	1	G	T	Homozygous	369	369	100	0.41779	37.5337	exon
NODE_10217_length_1620_cov_3930.368408 mapping	1042	Replacement	3	TTC	A	Homozygous	234	234	100	0.474359	36.9327	exon
NODE_10217_length_1620_cov_3930.368408 mapping	1047	SNV	1	T	G	Homozygous	234	234	100	0.474359	37.1368	exon
NODE_10217_length_1620_cov_3930.368408 mapping	1050	SNV	1	T	G	Homozygous	234	234	100	0.474359	37.1838	exon
NODE_10363_length_6669_cov_17.217573 mapping	4512	SNV	1	G	A	Homozygous	13	13	100	0.461538	37.9231	intergenic
NODE_10363_length_6669_cov_17.217573 mapping	4525	SNV	1	G	A	Homozygous	13	13	100	0.461538	36.7692	intergenic
NODE_10363_length_6669_cov_17.217573 mapping	4547	Deletion	1	C	-	Homozygous	10	12	83.3333	0.4	37.2	intergenic
NODE_10363_length_6669_cov_17.217573 mapping	4563	SNV	1	C	T	Homozygous	11	11	100	0.363636	37.1818	intergenic
NODE_10363_length_6669_cov_17.217573 mapping	4568	SNV	1	C	T	Homozygous	11	11	100	0.363636	34	intergenic
NODE_10363_length_6669_cov_17.217573 mapping	4611	Insertion	1	-	T	Homozygous	12	12	100	0.333333	36.75	intergenic
NODE_10363_length_6669_cov_17.217573 mapping	4613	SNV	1	A	T	Homozygous	12	12	100	0.333333	38.1667	intergenic
NODE_10363_length_6669_cov_17.217573 mapping	4630	SNV	1	A	G	Homozygous	13	13	100	0.384615	38.8462	intergenic
NODE_10363_length_6669_cov_17.217573 mapping	4635	SNV	1	C	A	Homozygous	13	13	100	0.384615	39.0769	intergenic
NODE_10363_length_6669_cov_17.217573 mapping	4642	SNV	1	C	A	Homozygous	15	15	100	0.333333	37.3333	intergenic
NODE_10363_length_6669_cov_17.217573 mapping	4648	SNV	1	T	C	Homozygous	14	15	93.3333	0.285714	38.1429	intergenic
NODE_10363_length_6669_cov_17.217573 mapping	4693	SNV	1	A	G	Homozygous	14	14	100	0.214286	36.6429	intergenic
NODE_10363_length_6669_cov_17.217573 mapping	4704	SNV	1	A	T	Homozygous	10	10	100	0.3	36.7	intergenic
NODE_10363_length_6669_cov_17.217573 mapping	4718	MNV	2	CT	AC	Homozygous	12	12	100	0.25	37.875	intergenic
NODE_10363_length_6669_cov_17.217573 mapping	4728	SNV	1	T	A	Homozygous	13	15	86.6667	0.461538	35.0769	intergenic
NODE_10363_length_6669_cov_17.217573 mapping	4734	SNV	1	T	C	Homozygous	19	19	100	0.368421	37.8421	intergenic
NODE_10363_length_6669_cov_17.217573 mapping	4751	SNV	1	G	T	Homozygous	17	18	94.4444	0.411765	38.5882	intergenic
NODE_10363_length_6669_cov_17.217573 mapping	4756	SNV	1	A	G	Homozygous	20	20	100	0.45	38.4	intergenic
NODE_10363_length_6669_cov_17.217573 mapping	4781	SNV	1	A	C	Homozygous	20	20	100	0.5	39.35	intergenic
NODE_10363_length_6669_cov_17.217573 mapping	4783	SNV	1	C	T	Homozygous	20	20	100	0.5	40.2	intergenic
NODE_10363_length_6669_cov_17.217573 mapping	4813	SNV	1	A	G	Homozygous	16	16	100	0.4375	39.375	intergenic
NODE_10363_length_6669_cov_17.217573 mapping	4823	SNV	1	A	G	Heterozygous	7	12	58.3333	0.285714	40.1429	intergenic
NODE_10363_length_6669_cov_17.217573 mapping	4826	SNV	1	T	C	Homozygous	10	10	100	0.4	38.8	intergenic
NODE_10363_length_6669_cov_17.217573 mapping	4830	SNV	1	C	T	Homozygous	11	11	100	0.363636	36.0909	intergenic
NODE_10363_length_6669_cov_17.217573 mapping	4833	SNV	1	G	A	Homozygous	11	11	100	0.363636	38.3636	intergenic
NODE_10363_length_6669_cov_17.217573 mapping	4839	SNV	1	A	C	Homozygous	13	13	100	0.307692	37.2308	intergenic
NODE_10363_length_6669_cov_17.217573 mapping	4850	SNV	1	C	A	Homozygous	11	11	100	0.363636	35.8182	intergenic
NODE_10363_length_6669_cov_17.217573 mapping	4868	SNV	1	G	T	Homozygous	10	10	100	0.2	38.2	intergenic
NODE_10363_length_6669_cov_17.217573 mapping	4870	SNV	1	A	G	Homozygous	10	10	100	0.2	37.5	intergenic
NODE_10363_length_6669_cov_17.217573 mapping	4876	SNV	1	A	C	Homozygous	12	12	100	0.166667	37	intergenic
NODE_10363_length_6669_cov_17.217573 mapping	4880	SNV	1	C	T	Homozygous	12	12	100	0.166667	37.8333	intergenic
NODE_10363_length_6669_cov_17.217573 mapping	4916	SNV	1	G	A	Homozygous	16	16	100	0.0625	38.75	intergenic
NODE_10363_length_6669_cov_17.217573 mapping	4918	SNV	1	T	G	Homozygous	16	16	100	0.0625	38.8125	intergenic
NODE_10363_length_6669_cov_17.217573 mapping	4928	SNV	1	A	T	Homozygous	13	13	100	0.0769231	39.3846	intergenic
NODE_10363_length_6669_cov_17.217573 mapping	4932	SNV	1	A	T	Homozygous	11	11	100	0.0909091	39.5455	intergenic
NODE_10363_length_6669_cov_17.217573 mapping	4943	SNV	1	G	C	Homozygous	11	11	100	0.0909091	40	intergenic
NODE_10363_length_6669_cov_17.217573 mapping	4949	SNV	1	C	A	Homozygous	11	11	100	0.0909091	38.8182	intergenic
NODE_10363_length_6669_cov_17.217573 mapping	4954	SNV	1	C	T	Homozygous	9	10	90	0.111111	39.2222	intergenic
NODE_10370_length_1532_cov_60.362270 mapping	1059	SNV	1	C	T	Homozygous	12	12	100	0.5	38.3333	exon
NODE_10367_length_23907_cov_39.671394 mapping	3949	MNV	2	GC	AG	Homozygous	17	17	100	0.0588235	34.7941	exon
NODE_10367_length_23907_cov_39.671394 mapping	3956	SNV	1	G	A	Heterozygous	5	18	27.7778	0.2	30.8	exon
NODE_10367_length_23907_cov_39.671394 mapping	3988	SNV	1	A	G	Homozygous	9	11	81.8182	0.222222	30.6667	exon
NODE_10367_length_23907_cov_39.671394 mapping	3990	SNV	1	T	C	Homozygous	9	11	81.8182	0.222222	31.2222	exon
NODE_10367_length_23907_cov_39.671394 mapping	4002	SNV	1	T	C	Homozygous	9	10	90	0.222222	33	exon
NODE_10511_length_5919_cov_54.519684 mapping	2312	Deletion	1	G	-	Heterozygous	11	14	78.5714	0.0909091	32.6364	intron
NODE_10511_length_5919_cov_54.519684 mapping	2316	SNV	1	A	C	Homozygous	12	15	80	0.0833333	38.25	intron
NODE_10511_length_5919_cov_54.519684 mapping	2320	SNV	1	A	G	Homozygous	15	15	100	0.133333	39.1333	intron
NODE_10511_length_5919_cov_54.519684 mapping	2353	SNV	1	A	G	Heterozygous	7	20	35	0.142857	38.1429	intron
NODE_10511_length_5919_cov_54.519684 mapping	2360	SNV	1	A	C	Homozygous	21	21	100	0.0952381	37.9524	intron
NODE_10511_length_5919_cov_54.519684 mapping	2372	SNV	1	G	T	Homozygous	8	19	42.1053	0.125	36.625	intron
NODE_10511_length_5919_cov_54.519684 mapping	2389	SNV	1	A	T	Homozygous	12	12	100	0.0833333	38.0833	intron
NODE_10748_length_1034_cov_66.125725 mapping	572	SNV	1	T	A	Homozygous	10	10	100	0.5	37.6	intergenic
NODE_10748_length_1034_cov_66.125725 mapping	577	Insertion	1	-	T	Heterozygous	7	11	63.6364	0.428571	37.8571	intergenic
NODE_10748_length_1034_cov_66.125725 mapping	580	SNV	1	A	T	Homozygous	11	11	100	0.454545	39.4545	intergenic
NODE_10748_length_1034_cov_66.125725 mapping	586	SNV	1	T	A	Homozygous	11	11	100	0.363636	37.3636	intergenic
NODE_10748_length_1034_cov_66.125725 mapping	588	SNV	1	A	C	Homozygous	11	11	100	0.363636	40.0909	intergenic
NODE_10748_length_1034_cov_66.125725 mapping	610	SNV	1	A	C	Homozygous	15	15	100	0.4	39.8	intergenic
NODE_10748_length_1034_cov_66.125725 mapping	625	SNV	1	T	C	Heterozygous	4	15	26.6667	0.25	40.25	intergenic
NODE_10748_length_1034_cov_66.125725 mapping	631	SNV	1	G	T	Homozygous	14	14	100	0.357143	40.0714	intergenic
NODE_10748_length_1034_cov_66.125725 mapping	633	SNV	1	A	G	Homozygous	14	14	100	0.357143	39.2857	intergenic
NODE_10748_length_1034_cov_66.125725 mapping	641	MNV	2	CT	TA	Homozygous	13	13	100	0.307692	38.2308	intergenic
NODE_10748_length_1034_cov_66.125725 mapping	649	MNV	2	CA	TG	Heterozygous	6	11	54.5455	0.333333	38.6667	intergenic
NODE_10748_length_1034_cov_66.125725 mapping	650	SNV	1	A	G	Heterozygous	5	11	45.4545	0.2	38	intergenic
NODE_10748_length_1034_cov_66.125725 mapping	652	SNV	1	C	T	Homozygous	10	10	100	0.2	37.2	intergenic
NODE_10748_length_1034_cov_66.125725 mapping	724	SNV	1	T	A	Homozygous	10	10	100	0.3	37.5	intergenic
NODE_10748_length_1034_cov_66.125725 mapping	745	SNV	1	A	G	Homozygous	12	12	100	0.25	38.8333	intergenic
NODE_10748_length_1034_cov_66.125725 mapping	782	SNV	1	A	T	Homozygous	19	19	100	0.473684	38	intergenic
NODE_10748_length_1034_cov_66.125725 mapping	809	SNV	1	T	G	Homozygous	19	19	100	0.315789	38.9474	intergenic
NODE_10748_length_1034_cov_66.125725 mapping	846	SNV	1	T	A	Homozygous	14	14	100	0.214286	37.5	intergenic
NODE_11143_length_1331_cov_61.602554 mapping	1044	SNV	1	A	G	Homozygous	11	11	100	0.454545	38.9091	intergenic
NODE_11143_length_1331_cov_61.602554 mapping	1059	SNV	1	A	T	Homozygous	14	14	100	0.428571	38.7857	intergenic
NODE_11143_length_1331_cov_61.602554 mapping	1061	SNV	1	A	G	Homozygous	14	14	100	0.428571	39.5714	intergenic
NODE_11143_length_1331_cov_61.602554 mapping	1091	MNV	2	GA	AG	Homozygous	17	17	100	0.352941	39.1471	intergenic
NODE_11143_length_1331_cov_61.602554 mapping	1103	SNV	1	A	T	Homozygous	15	15	100	0.4	39.5333	intergenic
NODE_11143_length_1331_cov_61.602554 mapping	1129	Insertion	4	-	TGAG	Heterozygous	7	12	58.3333	0.142857	40.6786	intergenic
NODE_11962_length_2095_cov_57.087830 mapping	1208	SNV	1	T	C	Homozygous	6	11	54.5455	0.5	37.8333	intron
NODE_11962_length_2095_cov_57.087830 mapping	1294	SNV	1	T	C	Heterozygous	5	11	45.4545	0.2	38.8	intron
NODE_11962_length_2095_cov_57.087830 mapping	1317	SNV	1	G	T	Heterozygous	3	10	30	0.333333	39.6667	intron
NODE_12184_length_12578_cov_56.653683 mapping	8029	SNV	1	A	C	Homozygous	10	10	100	0.3	37.4	intron
NODE_12184_length_12578_cov_56.653683 mapping	8040	SNV	1	G	T	Homozygous	10	10	100	0.3	36.3	intron
NODE_12184_length_12578_cov_56.653683 mapping	8056	SNV	1	A	T	Homozygous	11	11	100	0.454545	37.8182	intron
NODE_12184_length_12578_cov_56.653683 mapping	8064	SNV	1	T	C	Homozygous	9	10	90	0.444444	37.6667	intron
NODE_12184_length_12578_cov_56.653683 mapping	8066	SNV	1	C	T	Homozygous	10	10	100	0.5	36.5	intron
NODE_12184_length_12578_cov_56.653683 mapping	8068	SNV	1	A	G	Homozygous	10	10	100	0.5	36.2	intron
NODE_7764_length_15384_cov_38.730953 mapping	3128	SNV	1	T	C	Homozygous	10	10	100	0.4	39.2	intron
NODE_7764_length_15384_cov_38.730953 mapping	3367	SNV	1	A	T	Homozygous	11	11	100	0.363636	37.5455	intron
NODE_7764_length_15384_cov_38.730953 mapping	3371	SNV	1	T	C	Homozygous	11	11	100	0.363636	37.9091	intron
NODE_7764_length_15384_cov_38.730953 mapping	3375	SNV	1	A	C	Homozygous	11	11	100	0.363636	37.7273	intron
NODE_7764_length_15384_cov_38.730953 mapping	4976	SNV	1	C	A	Homozygous	13	13	100	0.357143	37.2857	intron
NODE_7764_length_15384_cov_38.730953 mapping	4999	SNV	1	A	G	Homozygous	13	13	100	0.357143	39.9286	intron
NODE_7764_length_15384_cov_38.730953 mapping	5007	SNV	1	G	A	Homozygous	13	13	100	0.357143	37.9286	intron
NODE_7764_length_15384_cov_38.730953 mapping	5021	SNV	1	C	A	Homozygous	12	12	100	0.307692	39.4615	intron
NODE_7764_length_15384_cov_38.730953 mapping	5040	Insertion	1	-	C	Homozygous	14	14	100	0.214286	36.8571	intron
NODE_7764_length_15384_cov_38.730953 mapping	5049	SNV	1	T	C	Homozygous	10	10	100	0.2	38.4	intron
NODE_7764_length_15384_cov_38.730953 mapping	5052	SNV	1	C	A	Homozygous	10	10	100	0.2	36.9	intron
NODE_7764_length_15384_cov_38.730953 mapping	5203	MNV	2	AA	GC	Homozygous	11	11	100	0.454545	39	intron
NODE_7764_length_15384_cov_38.730953 mapping	5210	SNV	1	T	A	Homozygous	11	11	100	0.454545	36.9091	intron
NODE_7764_length_15384_cov_38.730953 mapping	5226	SNV	1	A	C	Homozygous	11	11	100	0.454545	38.4545	intron
NODE_7764_length_15384_cov_38.730953 mapping	5241	SNV	1	C	T	Homozygous	12	12	100	0.416667	36.4167	intron
NODE_7764_length_15384_cov_38.730953 mapping	5250	SNV	1	T	C	Homozygous	13	13	100	0.384615	36.4615	intron
NODE_7764_length_15384_cov_38.730953 mapping	5432	SNV	1	T	C	Homozygous	10	10	100	0.363636	38.8182	intron
NODE_7764_length_15384_cov_38.730953 mapping	5473	SNV	1	A	G	Homozygous	11	11	100	0.363636	39.2727	intron
NODE_8881_length_10906_cov_4.210618 mapping	6596	SNV	1	C	T	Homozygous	12	13	92.3077	0.416667	36.4167	exon
NODE_8881_length_10906_cov_4.210618 mapping	6613	SNV	1	A	T	Heterozygous	7	12	58.3333	0.428571	38.5714	exon
NODE_8881_length_10906_cov_4.210618 mapping	6617	SNV	1	T	G	Homozygous	12	12	100	0.5	34.5833	exon
NODE_8881_length_10906_cov_4.210618 mapping	6620	MNV	2	GG	AC	Heterozygous	7	12	58.3333	0.428571	34.6429	exon
NODE_8881_length_10906_cov_4.210618 mapping	6620	MNV	2	GG	AT	Heterozygous	5	12	41.6667	0.4	35.6	exon
NODE_8881_length_10906_cov_4.210618 mapping	6665	SNV	1	G	A	Heterozygous	4	10	40	0.25	37.75	exon
NODE_12591_length_8156_cov_22.262997 mapping	6420	Insertion	1	-	T	Homozygous	11	11	100	0.272727	37.9091	intergenic
NODE_12591_length_8156_cov_22.262997 mapping	6437	SNV	1	T	C	Homozygous	10	10	100	0.4	37.5	intergenic
NODE_12816_length_1975_cov_94.792908 mapping	727	SNV	1	T	G	Homozygous	10	10	100	0.4	35.2	intergenic
NODE_12816_length_1975_cov_94.792908 mapping	735	SNV	1	G	A	Heterozygous	6	10	60	0.5	36.6667	intergenic
NODE_12816_length_1975_cov_94.792908 mapping	748	SNV	1	A	G	Heterozygous	6	11	54.5455	0.5	33.1667	intergenic
NODE_12816_length_1975_cov_94.792908 mapping	753	MNV	2	TG	CT	Homozygous	10	10	100	0.3	32.05	intergenic
NODE_12816_length_1975_cov_94.792908 mapping	763	SNV	1	T	C	Homozygous	10	10	100	0.3	36.2	intergenic
NODE_13036_length_2006_cov_39.246262 mapping	1594	Deletion	1	T	-	Homozygous	11	11	100	0.0909091	35.2727	intergenic
NODE_13036_length_2006_cov_39.246262 mapping	1596	Deletion	2	AC	-	Homozygous	11	11	100	0.0909091	35.1818	intergenic
NODE_13036_length_2006_cov_39.246262 mapping	1609	SNV	1	G	T	Homozygous	12	12	100	0.0833333	36.6667	intergenic
NODE_13036_length_2006_cov_39.246262 mapping	1680	Insertion	1	-	C	Homozygous	10	10	100	0.4	34	intergenic
NODE_13322_length_19367_cov_28.382454 mapping	6147	SNV	1	C	T	Homozygous	11	11	100	0.181818	32.3636	intron
NODE_13322_length_19367_cov_28.382454 mapping	6172	SNV	1	G	C	Homozygous	10	10	100	0.5	35.6	intron
NODE_13322_length_19367_cov_28.382454 mapping	6272	SNV	1	A	C	Homozygous	12	12	100	0.5	39.3333	intron
NODE_13322_length_19367_cov_28.382454 mapping	6274	SNV	1	A	G	Homozygous	12	12	100	0.5	40	intron
NODE_13322_length_19367_cov_28.382454 mapping	6302	SNV	1	C	T	Homozygous	14	14	100	0.428571	38.4286	intron
NODE_13322_length_19367_cov_28.382454 mapping	6306	SNV	1	G	T	Homozygous	14	14	100	0.428571	37.4286	intron
NODE_13322_length_19367_cov_28.382454 mapping	6315	Insertion	1	-	G	Homozygous	12	14	85.7143	0.416667	39.4167	intron
NODE_13359_length_16073_cov_53.301624 mapping	2473	SNV	1	A	C	Homozygous	11	11	100	0.363636	39.5455	intergenic
NODE_13359_length_16073_cov_53.301624 mapping	2507	SNV	1	A	G	Homozygous	10	10	100	0.5	37.5	intergenic
NODE_13359_length_16073_cov_53.301624 mapping	3053	SNV	1	T	A	Homozygous	10	10	100	0.3	38.1	intergenic
NODE_13359_length_16073_cov_53.301624 mapping	7632	SNV	1	A	G	Homozygous	11	11	100	0.5	39	intergenic
NODE_13359_length_16073_cov_53.301624 mapping	7640	SNV	1	T	C	Homozygous	11	11	100	0.5	39.0833	intergenic
NODE_13359_length_16073_cov_53.301624 mapping	7642	SNV	1	G	A	Homozygous	11	11	100	0.5	38.1667	intergenic
NODE_13359_length_16073_cov_53.301624 mapping	15106	SNV	1	T	A	Homozygous	6	13	46.1538	0.166667	38.5	intergenic
NODE_13359_length_16073_cov_53.301624 mapping	15125	MNV	2	GC	AT	Homozygous	15	15	100	0.0666667	38.1	intergenic
NODE_13359_length_16073_cov_53.301624 mapping	15154	MNV	2	AT	GA	Homozygous	14	14	100	0.142857	38.4286	intergenic
NODE_13359_length_16073_cov_53.301624 mapping	15165	SNV	1	A	G	Homozygous	5	14	35.7143	0.4	35.6	intergenic
NODE_13359_length_16073_cov_53.301624 mapping	15193	SNV	1	C	T	Homozygous	10	10	100	0.2	38.9	intergenic
NODE_13359_length_16073_cov_53.301624 mapping	15216	SNV	1	T	C	Homozygous	12	12	100	0.5	38.8333	intergenic
NODE_13359_length_16073_cov_53.301624 mapping	15222	SNV	1	A	C	Heterozygous	6	12	50	0.333333	40	intergenic
NODE_13359_length_16073_cov_53.301624 mapping	15232	MNV	2	CT	AC	Homozygous	11	11	100	0.363636	39.0909	intergenic
NODE_13359_length_16073_cov_53.301624 mapping	15244	SNV	1	G	A	Homozygous	12	12	100	0.25	39.1667	intergenic
NODE_13359_length_16073_cov_53.301624 mapping	15254	SNV	1	T	G	Homozygous	12	12	100	0.25	39.1667	intergenic
NODE_13359_length_16073_cov_53.301624 mapping	15294	SNV	1	T	C	Heterozygous	9	16	56.25	0.111111	37.8889	intergenic
NODE_13359_length_16073_cov_53.301624 mapping	15296	SNV	1	A	T	Homozygous	15	15	100	0.266667	37.7333	intergenic
NODE_13359_length_16073_cov_53.301624 mapping	15300	SNV	1	C	T	Homozygous	15	15	100	0.266667	38.0667	intergenic
NODE_13359_length_16073_cov_53.301624 mapping	15333	SNV	1	A	C	Heterozygous	9	15	60	0.111111	38.7778	intergenic
NODE_13359_length_16073_cov_53.301624 mapping	15368	SNV	1	G	T	Homozygous	11	11	100	0.272727	39.8182	intergenic
NODE_13359_length_16073_cov_53.301624 mapping	15370	SNV	1	G	A	Homozygous	11	11	100	0.272727	38.8182	intergenic
NODE_13359_length_16073_cov_53.301624 mapping	15508	SNV	1	T	A	Homozygous	10	10	100	0.4	38.1	intergenic
NODE_13359_length_16073_cov_53.301624 mapping	15527	SNV	1	C	T	Homozygous	11	11	100	0.416667	31.75	intergenic
NODE_13359_length_16073_cov_53.301624 mapping	15546	SNV	1	T	C	Homozygous	13	15	86.6667	0.461538	38	intergenic
NODE_13359_length_16073_cov_53.301624 mapping	15550	SNV	1	T	A	Homozygous	14	14	100	0.5	37.9286	intergenic
NODE_13359_length_16073_cov_53.301624 mapping	15560	SNV	1	A	G	Homozygous	14	14	100	0.5	37.3571	intergenic
NODE_13359_length_16073_cov_53.301624 mapping	15567	Replacement	2	CA	G	Homozygous	14	14	100	0.5	36.5714	intergenic
NODE_13359_length_16073_cov_53.301624 mapping	15597	SNV	1	C	A	Homozygous	13	13	100	0.384615	38	intergenic
NODE_13359_length_16073_cov_53.301624 mapping	15604	SNV	1	G	A	Homozygous	11	11	100	0.454545	37.6364	intergenic
NODE_13551_length_2067_cov_65.919205 mapping	1797	SNV	1	A	G	Homozygous	10	10	100	0.1	37.3	intergenic
NODE_13551_length_2067_cov_65.919205 mapping	1805	SNV	1	A	G	Heterozygous	3	15	20	0.333333	39.3333	intergenic
NODE_13551_length_2067_cov_65.919205 mapping	1813	SNV	1	C	T	Homozygous	17	17	100	0.294118	37.4118	intergenic
NODE_13551_length_2067_cov_65.919205 mapping	1844	SNV	1	G	T	Heterozygous	6	17	35.2941	0.333333	39	intergenic
NODE_13551_length_2067_cov_65.919205 mapping	1848	SNV	1	A	G	Heterozygous	11	17	64.7059	0.272727	36.6364	intergenic
NODE_13551_length_2067_cov_65.919205 mapping	1863	MNV	2	TG	AC	Heterozygous	8	14	57.1429	0.375	37.75	intergenic
NODE_13493_length_21249_cov_44.548309 mapping	17543	SNV	1	A	C	Homozygous	10	10	100	0.3	38.6	intergenic
NODE_13493_length_21249_cov_44.548309 mapping	17548	SNV	1	G	A	Homozygous	10	10	100	0.3	39.8	intergenic
NODE_13493_length_21249_cov_44.548309 mapping	17659	SNV	1	A	G	Homozygous	10	10	100	0.3	36.9	intergenic
NODE_13493_length_21249_cov_44.548309 mapping	17671	SNV	1	G	A	Homozygous	10	10	100	0.3	37.1	intergenic
NODE_13493_length_21249_cov_44.548309 mapping	17674	SNV	1	T	A	Homozygous	10	10	100	0.3	36	intergenic
NODE_13493_length_21249_cov_44.548309 mapping	17686	SNV	1	T	C	Homozygous	10	10	100	0.2	38.7	intergenic
NODE_13493_length_21249_cov_44.548309 mapping	17695	SNV	1	G	A	Homozygous	10	10	100	0.1	37	intergenic
NODE_13493_length_21249_cov_44.548309 mapping	17718	SNV	1	C	A	Homozygous	11	11	100	0.363636	38.6364	intergenic
NODE_13493_length_21249_cov_44.548309 mapping	17720	SNV	1	A	G	Homozygous	11	11	100	0.363636	39.4545	intergenic
NODE_13493_length_21249_cov_44.548309 mapping	17733	SNV	1	C	T	Homozygous	11	12	91.6667	0.454545	39	intergenic
NODE_13493_length_21249_cov_44.548309 mapping	17741	SNV	1	T	C	Homozygous	12	12	100	0.416667	38.5	intergenic
NODE_13493_length_21249_cov_44.548309 mapping	17978	SNV	1	C	T	Homozygous	10	10	100	0.454545	39.0909	intergenic
NODE_13493_length_21249_cov_44.548309 mapping	17984	SNV	1	T	A	Homozygous	10	10	100	0.454545	38.3636	intergenic
NODE_13493_length_21249_cov_44.548309 mapping	20384	SNV	1	T	A	Homozygous	10	10	100	0.1	39.2	intergenic
NODE_13493_length_21249_cov_44.548309 mapping	20491	SNV	1	C	T	Homozygous	10	10	100	0.3	36.8	intergenic
NODE_13493_length_21249_cov_44.548309 mapping	20494	SNV	1	C	T	Homozygous	10	10	100	0.3	35.2	intergenic
NODE_13493_length_21249_cov_44.548309 mapping	20502	SNV	1	C	G	Homozygous	10	10	100	0.3	37	intergenic
NODE_13493_length_21249_cov_44.548309 mapping	20504	SNV	1	C	T	Homozygous	10	10	100	0.3	37.4	intergenic
NODE_13493_length_21249_cov_44.548309 mapping	20527	SNV	1	C	A	Homozygous	10	10	100	0.4	38.7	intergenic
NODE_13493_length_21249_cov_44.548309 mapping	20574	SNV	1	C	A	Homozygous	13	13	100	0.230769	38.6154	intergenic
NODE_13493_length_21249_cov_44.548309 mapping	20583	Deletion	1	A	-	Homozygous	10	10	100	0.4	36.5	intergenic
NODE_13493_length_21249_cov_44.548309 mapping	20630	SNV	1	T	C	Homozygous	10	10	100	0.2	39.4	intergenic
NODE_13493_length_21249_cov_44.548309 mapping	20640	SNV	1	G	A	Homozygous	11	11	100	0.272727	39.9091	intergenic
NODE_13493_length_21249_cov_44.548309 mapping	20650	SNV	1	G	T	Homozygous	11	11	100	0.25	38.25	intergenic
NODE_14097_length_2578_cov_95.522888 mapping	2044	SNV	1	C	G	Homozygous	10	10	100	0.3	39.7	intergenic
NODE_14097_length_2578_cov_95.522888 mapping	2082	MNV	2	GA	TT	Homozygous	13	13	100	0.307692	38.9231	intergenic
NODE_14164_length_8795_cov_53.601250 mapping	888	Deletion	1	T	-	Homozygous	9	11	81.8182	0.333333	38.6667	intron
NODE_14164_length_8795_cov_53.601250 mapping	890	Deletion	1	T	-	Homozygous	9	11	81.8182	0.333333	38.6667	intron
NODE_14164_length_8795_cov_53.601250 mapping	1709	Insertion	1	-	T	Homozygous	9	10	90	0.222222	37.1111	intron
NODE_14164_length_8795_cov_53.601250 mapping	5953	SNV	1	C	G	Homozygous	10	10	100	0.5	37.9	intron
NODE_14164_length_8795_cov_53.601250 mapping	5973	SNV	1	T	C	Homozygous	9	10	90	0.444444	37.6667	intron
NODE_14323_length_1329_cov_60.731377 mapping	273	SNV	1	A	G	Homozygous	10	10	100	0.2	39.7	intergenic
NODE_14323_length_1329_cov_60.731377 mapping	876	SNV	1	G	C	Homozygous	10	10	100	0.1	38.1	intergenic
NODE_14548_length_8005_cov_52.618614 mapping	3810	SNV	1	C	A	Homozygous	12	12	100	0.307692	37.3077	intron
NODE_14548_length_8005_cov_52.618614 mapping	3973	SNV	1	C	T	Homozygous	11	11	100	0.363636	38.1818	intron
NODE_14548_length_8005_cov_52.618614 mapping	3986	SNV	1	T	C	Homozygous	10	10	100	0.4	38.1	intron
NODE_14542_length_12347_cov_31.177614 mapping	7290	SNV	1	A	C	Homozygous	8	10	80	0.375	38	intergenic
NODE_14542_length_12347_cov_31.177614 mapping	7293	SNV	1	G	T	Homozygous	10	10	100	0.3	36.8	intergenic
NODE_14542_length_12347_cov_31.177614 mapping	7295	SNV	1	T	C	Homozygous	7	10	70	0.285714	37.7143	intergenic
NODE_14542_length_12347_cov_31.177614 mapping	7298	SNV	1	C	T	Homozygous	8	10	80	0.375	38.625	intergenic
NODE_14542_length_12347_cov_31.177614 mapping	7321	Insertion	1	-	A	Homozygous	7	10	70	0.428571	39.4286	intergenic
NODE_14542_length_12347_cov_31.177614 mapping	9583	SNV	1	C	G	Heterozygous	4	10	40	0.25	36.75	intergenic
NODE_14542_length_12347_cov_31.177614 mapping	9594	SNV	1	A	T	Homozygous	9	10	90	0.333333	39.2222	intergenic
NODE_14603_length_21227_cov_51.822536 mapping	3637	SNV	1	A	T	Homozygous	10	10	100	0.1	35.1	intergenic
NODE_14603_length_21227_cov_51.822536 mapping	3650	SNV	1	C	A	Homozygous	10	10	100	0.1	38.7	intergenic
NODE_14603_length_21227_cov_51.822536 mapping	3652	SNV	1	T	G	Homozygous	10	10	100	0.1	38.1	intergenic
NODE_14603_length_21227_cov_51.822536 mapping	3659	SNV	1	C	T	Homozygous	10	10	100	0.1	38	intergenic
NODE_14603_length_21227_cov_51.822536 mapping	3747	SNV	1	A	T	Homozygous	13	13	100	0.307692	39.5385	intergenic
NODE_14603_length_21227_cov_51.822536 mapping	3755	SNV	1	T	G	Homozygous	14	14	100	0.357143	39	intergenic
NODE_14603_length_21227_cov_51.822536 mapping	3772	Deletion	1	T	-	Homozygous	14	16	87.5	0.285714	37.8571	intergenic
NODE_14603_length_21227_cov_51.822536 mapping	3792	SNV	1	T	C	Homozygous	15	15	100	0.4	38.4	intergenic
NODE_14603_length_21227_cov_51.822536 mapping	3804	SNV	1	T	A	Homozygous	17	17	100	0.411765	37.4118	intergenic
NODE_14603_length_21227_cov_51.822536 mapping	3820	SNV	1	T	C	Heterozygous	9	15	60	0.5	37.3	intergenic
NODE_14603_length_21227_cov_51.822536 mapping	3822	SNV	1	G	A	Homozygous	14	14	100	0.4	38.4667	intergenic
NODE_14603_length_21227_cov_51.822536 mapping	3830	MNV	2	GT	CC	Homozygous	12	12	100	0.333333	38.7083	intergenic
NODE_14603_length_21227_cov_51.822536 mapping	6377	SNV	1	T	G	Homozygous	10	10	100	0.4	38.1	intron
NODE_14603_length_21227_cov_51.822536 mapping	6381	SNV	1	T	C	Homozygous	10	11	90.9091	0.4	38.1	intron
NODE_14603_length_21227_cov_51.822536 mapping	8671	SNV	1	T	G	Homozygous	10	10	100	0.4	36.6	intron
NODE_14603_length_21227_cov_51.822536 mapping	8701	SNV	1	T	G	Homozygous	10	10	100	0.4	38.6	intron
NODE_14603_length_21227_cov_51.822536 mapping	20682	SNV	1	T	A	Homozygous	10	10	100	0.5	37.6	intergenic
NODE_14603_length_21227_cov_51.822536 mapping	20684	SNV	1	G	A	Homozygous	10	10	100	0.5	39.3	intergenic
NODE_9390_length_31708_cov_26.360193 mapping	2475	SNV	1	A	C	Heterozygous	4	10	40	0.25	38.25	intergenic
NODE_9390_length_31708_cov_26.360193 mapping	2480	SNV	1	C	A	Heterozygous	6	10	60	0.333333	38.6667	intergenic
NODE_9390_length_31708_cov_26.360193 mapping	12952	SNV	1	A	T	Homozygous	10	10	100	0.1	40.3	intron
NODE_9390_length_31708_cov_26.360193 mapping	12995	SNV	1	C	T	Homozygous	11	11	100	0.181818	40.3636	intron
NODE_9390_length_31708_cov_26.360193 mapping	13007	SNV	1	A	G	Homozygous	13	13	100	0.230769	38.0769	intron
NODE_9390_length_31708_cov_26.360193 mapping	13012	SNV	1	T	C	Homozygous	14	14	100	0.214286	38.4286	intron
NODE_9390_length_31708_cov_26.360193 mapping	13019	SNV	1	C	A	Homozygous	13	13	100	0.153846	37.7692	intron
NODE_9390_length_31708_cov_26.360193 mapping	13025	SNV	1	G	A	Homozygous	12	12	100	0.230769	37.0769	intron
NODE_9390_length_31708_cov_26.360193 mapping	13028	SNV	1	G	A	Homozygous	12	12	100	0.230769	36.8462	intron
NODE_9390_length_31708_cov_26.360193 mapping	13132	SNV	1	A	T	Homozygous	10	10	100	0.4	37.8	intron
NODE_9390_length_31708_cov_26.360193 mapping	13134	SNV	1	A	C	Homozygous	10	10	100	0.4	38.6	intron
NODE_9390_length_31708_cov_26.360193 mapping	13139	SNV	1	C	T	Homozygous	10	10	100	0.4	39.5	intron
NODE_9390_length_31708_cov_26.360193 mapping	13142	SNV	1	A	C	Homozygous	9	10	90	0.333333	40.1111	intron
NODE_9390_length_31708_cov_26.360193 mapping	13149	SNV	1	A	C	Homozygous	15	15	100	0.4	35.3333	intron
NODE_9390_length_31708_cov_26.360193 mapping	13162	SNV	1	C	T	Homozygous	14	14	100	0.285714	35.0714	intron
NODE_9390_length_31708_cov_26.360193 mapping	13176	SNV	1	A	C	Heterozygous	8	15	53.3333	0.25	38.875	intron
NODE_9390_length_31708_cov_26.360193 mapping	13176	SNV	1	A	T	Heterozygous	7	15	46.6667	0.285714	31.2857	intron
NODE_9390_length_31708_cov_26.360193 mapping	13188	SNV	1	G	T	Homozygous	13	13	100	0.230769	36.5385	intron
NODE_9390_length_31708_cov_26.360193 mapping	13219	SNV	1	A	T	Homozygous	9	10	90	0.111111	39.5556	intron
NODE_9390_length_31708_cov_26.360193 mapping	26749	SNV	1	C	T	Homozygous	10	10	100	0.2	39.1	intergenic
NODE_9390_length_31708_cov_26.360193 mapping	26874	SNV	1	T	C	Homozygous	10	10	100	0.5	36.5	intergenic
NODE_9390_length_31708_cov_26.360193 mapping	26885	MNV	2	GC	AA	Homozygous	11	11	100	0.454545	37.2273	intergenic
NODE_9390_length_31708_cov_26.360193 mapping	26893	SNV	1	A	T	Homozygous	10	11	90.9091	0.4	38.1	intergenic
NODE_12753_length_91349_cov_14.478560 mapping	18562	SNV	1	T	C	Homozygous	11	11	100	0.454545	38.0909	intron
NODE_12753_length_91349_cov_14.478560 mapping	18570	SNV	1	C	T	Homozygous	11	11	100	0.454545	34.3636	intron
NODE_12753_length_91349_cov_14.478560 mapping	18876	Insertion	1	-	T	Heterozygous	6	10	60	0.166667	38.8333	intron
NODE_12753_length_91349_cov_14.478560 mapping	19007	SNV	1	G	T	Homozygous	10	10	100	0.5	34.3	intron
NODE_12753_length_91349_cov_14.478560 mapping	19020	SNV	1	G	A	Homozygous	10	10	100	0.3	36.4	intron
NODE_12753_length_91349_cov_14.478560 mapping	19022	SNV	1	G	C	Homozygous	10	10	100	0.3	35.9	intron
NODE_12753_length_91349_cov_14.478560 mapping	19061	SNV	1	T	G	Homozygous	10	10	100	0.3	35.9	intron
NODE_12753_length_91349_cov_14.478560 mapping	19091	SNV	1	G	T	Homozygous	10	10	100	0.2	36.5	intron
NODE_12753_length_91349_cov_14.478560 mapping	20870	SNV	1	T	C	Homozygous	10	10	100	0.3	36.4	exon
NODE_12753_length_91349_cov_14.478560 mapping	24151	SNV	1	G	T	Homozygous	11	11	100	0.363636	39	intron
NODE_12753_length_91349_cov_14.478560 mapping	38531	Insertion	2	-	TA	Heterozygous	4	10	40	0.25	36.375	intergenic
NODE_12753_length_91349_cov_14.478560 mapping	38541	SNV	1	A	G	Homozygous	10	10	100	0.3	37.1	intergenic
NODE_14668_length_1230_cov_2278.603271 mapping	260	SNV	1	C	T	Heterozygous	88	359	24.5125	0.318182	36.375	exon
NODE_14668_length_1230_cov_2278.603271 mapping	519	SNV	1	C	A	Homozygous	352	353	99.7167	0.470588	35.3585	exon
NODE_14668_length_1230_cov_2278.603271 mapping	755	Deletion	4	CGCG	-	Homozygous	300	300	100	0.46	34.5265	exon
NODE_14668_length_1230_cov_2278.603271 mapping	818	SNV	1	G	T	Heterozygous	112	374	29.9465	0.4375	35.5625	exon
NODE_14668_length_1230_cov_2278.603271 mapping	1035	SNV	1	G	A	Heterozygous	112	373	30.0268	0.477876	36.4425	exon
NODE_14819_length_1776_cov_55.178490 mapping	1205	SNV	1	G	A	Homozygous	16	16	100	0.3125	39.3125	intergenic
NODE_14819_length_1776_cov_55.178490 mapping	1225	SNV	1	C	T	Heterozygous	10	14	71.4286	0.4	38.4	intergenic
NODE_14819_length_1776_cov_55.178490 mapping	1230	SNV	1	T	C	Homozygous	13	13	100	0.384615	39.4615	intergenic
NODE_14819_length_1776_cov_55.178490 mapping	1249	SNV	1	T	C	Heterozygous	6	10	60	0.5	38.1667	intergenic
NODE_14819_length_1776_cov_55.178490 mapping	1317	SNV	1	A	G	Homozygous	13	13	100	0.0769231	39	intergenic
NODE_15018_length_12002_cov_53.768372 mapping	2027	SNV	1	A	T	Homozygous	10	10	100	0.5	38.5	intergenic
NODE_15018_length_12002_cov_53.768372 mapping	2036	SNV	1	C	T	Heterozygous	3	10	30	0.333333	36	intergenic
NODE_15018_length_12002_cov_53.768372 mapping	2580	SNV	1	G	A	Homozygous	9	10	90	0.333333	34.8889	intergenic
NODE_15018_length_12002_cov_53.768372 mapping	2716	SNV	1	A	T	Homozygous	10	10	100	0.5	38.1	intergenic
NODE_15018_length_12002_cov_53.768372 mapping	2719	SNV	1	T	C	Homozygous	10	10	100	0.5	38.2	intergenic
NODE_15018_length_12002_cov_53.768372 mapping	2758	SNV	1	A	G	Homozygous	12	12	100	0.5	38.4167	intergenic
NODE_15018_length_12002_cov_53.768372 mapping	2763	SNV	1	T	G	Homozygous	12	12	100	0.5	36.75	intergenic
NODE_15018_length_12002_cov_53.768372 mapping	2767	SNV	1	A	G	Homozygous	12	12	100	0.5	37.4167	intergenic
NODE_15018_length_12002_cov_53.768372 mapping	2829	SNV	1	A	T	Homozygous	11	11	100	0.363636	38.3636	intergenic
NODE_15018_length_12002_cov_53.768372 mapping	2858	Deletion	2	AA	-	Homozygous	14	14	100	0.357143	35.6429	intergenic
NODE_15018_length_12002_cov_53.768372 mapping	2861	SNV	1	T	A	Homozygous	14	14	100	0.357143	37.7857	intergenic
NODE_15018_length_12002_cov_53.768372 mapping	2879	SNV	1	A	T	Homozygous	14	14	100	0.357143	39.5714	intergenic
NODE_15018_length_12002_cov_53.768372 mapping	2882	SNV	1	A	G	Homozygous	13	14	92.8571	0.384615	39.6154	intergenic
NODE_15018_length_12002_cov_53.768372 mapping	2887	SNV	1	T	A	Homozygous	13	13	100	0.384615	39.7692	intergenic
NODE_15018_length_12002_cov_53.768372 mapping	2889	SNV	1	T	G	Homozygous	12	13	92.3077	0.416667	39.8333	intergenic
NODE_15018_length_12002_cov_53.768372 mapping	2892	Insertion	1	-	T	Homozygous	12	13	92.3077	0.416667	39.0833	intergenic
NODE_15018_length_12002_cov_53.768372 mapping	3710	SNV	1	T	G	Homozygous	9	10	90	0.333333	34	intergenic
NODE_15018_length_12002_cov_53.768372 mapping	3713	SNV	1	A	G	Homozygous	10	10	100	0.4	33.6	intergenic
NODE_15018_length_12002_cov_53.768372 mapping	3946	SNV	1	T	C	Homozygous	12	12	100	0.416667	36.3333	intergenic
NODE_15018_length_12002_cov_53.768372 mapping	4001	SNV	1	G	A	Heterozygous	5	10	50	0.4	38.6	intergenic
NODE_15018_length_12002_cov_53.768372 mapping	4004	MNV	2	TC	CA	Homozygous	10	10	100	0.4	37.8	intergenic
NODE_15078_length_1905_cov_64.710236 mapping	1578	SNV	1	G	T	Heterozygous	3	12	25	0.333333	37.6667	intergenic
NODE_15078_length_1905_cov_64.710236 mapping	1646	SNV	1	A	T	Homozygous	14	16	87.5	0.357143	37.9286	intergenic
NODE_15078_length_1905_cov_64.710236 mapping	1655	SNV	1	C	T	Homozygous	13	13	100	0.230769	36.4615	intergenic
NODE_15078_length_1905_cov_64.710236 mapping	1682	SNV	1	A	G	Homozygous	11	12	91.6667	0.272727	34.6364	intergenic
NODE_15078_length_1905_cov_64.710236 mapping	1688	SNV	1	A	G	Homozygous	12	12	100	0.25	35.8333	intergenic
NODE_15078_length_1905_cov_64.710236 mapping	1717	SNV	1	C	T	Homozygous	10	11	90.9091	0.4	37	intergenic
NODE_15078_length_1905_cov_64.710236 mapping	1787	SNV	1	T	A	Homozygous	9	10	90	0.1	36.4	intergenic
NODE_15078_length_1905_cov_64.710236 mapping	1802	SNV	1	G	A	Homozygous	6	13	46.1538	0.142857	36.2857	intergenic
NODE_15179_length_1228_cov_79.106674 mapping	770	SNV	1	T	C	Homozygous	10	10	100	0.3	36.4	intergenic
NODE_15179_length_1228_cov_79.106674 mapping	778	SNV	1	C	T	Homozygous	10	10	100	0.3	37.7	intergenic
NODE_15223_length_1449_cov_65.437546 mapping	739	SNV	1	T	A	Homozygous	13	13	100	0.230769	38.9231	intergenic
NODE_15223_length_1449_cov_65.437546 mapping	760	SNV	1	C	T	Homozygous	13	13	100	0.0769231	39.2308	intergenic
NODE_15223_length_1449_cov_65.437546 mapping	779	SNV	1	G	T	Homozygous	11	11	100	0.0909091	39.6364	intergenic
NODE_15223_length_1449_cov_65.437546 mapping	783	SNV	1	A	G	Homozygous	11	11	100	0.0909091	39.2727	intergenic
NODE_15223_length_1449_cov_65.437546 mapping	974	SNV	1	C	T	Homozygous	14	14	100	0.214286	39.2857	intergenic
NODE_15382_length_7382_cov_55.141830 mapping	4848	SNV	1	A	G	Homozygous	11	11	100	0.363636	38.7273	exon
NODE_15558_length_8318_cov_51.103752 mapping	6217	SNV	1	G	T	Homozygous	10	10	100	0.4	39	intergenic
NODE_15558_length_8318_cov_51.103752 mapping	6221	SNV	1	C	G	Homozygous	10	10	100	0.4	38	intergenic
NODE_15558_length_8318_cov_51.103752 mapping	6243	SNV	1	T	A	Homozygous	11	11	100	0.363636	37.3636	intergenic
NODE_15558_length_8318_cov_51.103752 mapping	6253	SNV	1	C	T	Homozygous	11	11	100	0.454545	38.5455	intergenic
NODE_15558_length_8318_cov_51.103752 mapping	6267	MNV	2	CA	AT	Homozygous	13	13	100	0.461538	39.0385	intergenic
NODE_15558_length_8318_cov_51.103752 mapping	6280	SNV	1	C	T	Homozygous	12	12	100	0.416667	38.9167	intergenic
NODE_15558_length_8318_cov_51.103752 mapping	6288	SNV	1	C	A	Homozygous	13	13	100	0.461538	36.7692	intergenic
NODE_15558_length_8318_cov_51.103752 mapping	6291	SNV	1	G	T	Homozygous	13	13	100	0.461538	39	intergenic
NODE_15558_length_8318_cov_51.103752 mapping	6342	SNV	1	A	C	Homozygous	10	10	100	0.4	39.7	intergenic
NODE_15558_length_8318_cov_51.103752 mapping	6345	SNV	1	A	T	Homozygous	10	10	100	0.4	39.6	intergenic
NODE_15558_length_8318_cov_51.103752 mapping	6348	SNV	1	C	A	Homozygous	10	10	100	0.4	40	intergenic
NODE_15558_length_8318_cov_51.103752 mapping	6353	SNV	1	G	C	Homozygous	10	10	100	0.4	39.6	intergenic
NODE_15558_length_8318_cov_51.103752 mapping	6360	SNV	1	T	A	Homozygous	10	10	100	0.363636	39.0909	intergenic
NODE_15558_length_8318_cov_51.103752 mapping	6362	SNV	1	A	T	Homozygous	10	10	100	0.363636	38.6364	intergenic
NODE_15558_length_8318_cov_51.103752 mapping	6367	SNV	1	T	C	Homozygous	12	12	100	0.307692	37.8462	intergenic
NODE_15558_length_8318_cov_51.103752 mapping	6369	SNV	1	G	A	Homozygous	12	12	100	0.307692	38.6154	intergenic
NODE_15559_length_4917_cov_95.830177 mapping	966	SNV	1	A	G	Homozygous	10	10	100	0.5	39	exon
NODE_15616_length_9901_cov_48.869102 mapping	5919	Insertion	1	-	A	Homozygous	11	12	91.6667	0.363636	40	intergenic
NODE_15616_length_9901_cov_48.869102 mapping	5921	SNV	1	T	A	Homozygous	12	12	100	0.333333	39.5833	intergenic
NODE_15616_length_9901_cov_48.869102 mapping	5932	SNV	1	C	T	Homozygous	11	11	100	0.363636	40.0909	intergenic
NODE_15616_length_9901_cov_48.869102 mapping	5952	SNV	1	T	C	Homozygous	11	11	100	0.363636	39.8182	intergenic
NODE_15616_length_9901_cov_48.869102 mapping	5968	SNV	1	T	C	Homozygous	14	14	100	0.428571	37.4286	intergenic
NODE_15616_length_9901_cov_48.869102 mapping	7176	Deletion	2	CA	-	Homozygous	14	14	100	0.357143	36.7143	intergenic
NODE_15616_length_9901_cov_48.869102 mapping	7190	SNV	1	T	A	Homozygous	14	14	100	0.142857	38	intergenic
NODE_15616_length_9901_cov_48.869102 mapping	7194	SNV	1	C	T	Homozygous	13	13	100	0.153846	36.6154	intergenic
NODE_15616_length_9901_cov_48.869102 mapping	7197	MNV	2	GA	AT	Homozygous	13	13	100	0.153846	38.1923	intergenic
NODE_15616_length_9901_cov_48.869102 mapping	7209	SNV	1	A	G	Homozygous	8	14	57.1429	0.375	39.875	intergenic
NODE_15616_length_9901_cov_48.869102 mapping	7228	SNV	1	T	A	Homozygous	9	14	64.2857	0.444444	40.4444	intergenic
NODE_15727_length_1180_cov_81.400002 mapping	744	SNV	1	C	T	Homozygous	10	10	100	0.3	36.2	intergenic
NODE_15727_length_1180_cov_81.400002 mapping	769	SNV	1	A	T	Homozygous	10	10	100	0.2	36.5	intergenic
NODE_15855_length_8678_cov_54.649113 mapping	3532	SNV	1	T	G	Homozygous	11	11	100	0.363636	37.7273	intergenic
NODE_15855_length_8678_cov_54.649113 mapping	3538	SNV	1	A	C	Homozygous	11	11	100	0.363636	37.6364	intergenic
NODE_15855_length_8678_cov_54.649113 mapping	3768	SNV	1	A	G	Homozygous	10	10	100	0.5	38.1	intergenic
NODE_15855_length_8678_cov_54.649113 mapping	3781	SNV	1	T	A	Homozygous	10	10	100	0.5	39.8	intergenic
NODE_15855_length_8678_cov_54.649113 mapping	8613	SNV	1	T	C	Homozygous	11	11	100	0.214286	37.5714	intergenic
NODE_15855_length_8678_cov_54.649113 mapping	8616	SNV	1	A	G	Homozygous	10	11	90.9091	0.230769	37.8462	intergenic
NODE_15855_length_8678_cov_54.649113 mapping	8674	SNV	1	A	G	Homozygous	10	10	100	0.25	34	intergenic
NODE_15855_length_8678_cov_54.649113 mapping	8678	SNV	1	A	C	Homozygous	10	10	100	0.166667	35	intergenic
NODE_10909_length_49075_cov_18.740335 mapping	12104	SNV	1	T	G	Homozygous	10	10	100	0.4	34.2	intron
NODE_10909_length_49075_cov_18.740335 mapping	12114	SNV	1	T	A	Homozygous	10	11	90.9091	0.4	33.9	intron
NODE_10909_length_49075_cov_18.740335 mapping	12166	SNV	1	A	T	Homozygous	10	10	100	0.4	33.6	intron
NODE_10909_length_49075_cov_18.740335 mapping	12178	SNV	1	G	T	Homozygous	10	10	100	0.5	31.8	intron
NODE_10909_length_49075_cov_18.740335 mapping	12364	SNV	1	G	A	Homozygous	10	10	100	0.4	39.3	intron
NODE_10909_length_49075_cov_18.740335 mapping	15958	SNV	1	T	C	Homozygous	10	10	100	0.4	36.3	intron
NODE_10909_length_49075_cov_18.740335 mapping	15968	SNV	1	A	G	Homozygous	11	11	100	0.454545	36.7273	intron
NODE_10909_length_49075_cov_18.740335 mapping	16011	SNV	1	A	G	Homozygous	10	10	100	0.2	38.2	intron
NODE_16631_length_10045_cov_53.406174 mapping	3125	Deletion	1	G	-	Homozygous	10	10	100	0.5	38	intergenic
NODE_16631_length_10045_cov_53.406174 mapping	3144	SNV	1	C	A	Homozygous	11	11	100	0.454545	38.7273	intergenic
NODE_16631_length_10045_cov_53.406174 mapping	3148	SNV	1	C	T	Homozygous	11	11	100	0.454545	34.8182	intergenic
NODE_16631_length_10045_cov_53.406174 mapping	3151	Deletion	1	A	-	Homozygous	10	11	90.9091	0.4	37.2	intergenic
NODE_16631_length_10045_cov_53.406174 mapping	4395	SNV	1	C	G	Homozygous	11	11	100	0.181818	38.1818	exon
NODE_17116_length_4913_cov_51.186035 mapping	3442	SNV	1	G	A	Homozygous	12	12	100	0.230769	37.9231	intergenic
NODE_17116_length_4913_cov_51.186035 mapping	3467	SNV	1	G	A	Homozygous	13	13	100	0.285714	39	intergenic
NODE_17116_length_4913_cov_51.186035 mapping	3474	MNV	2	GA	AG	Homozygous	14	14	100	0.214286	39.2143	intergenic
NODE_17116_length_4913_cov_51.186035 mapping	3481	MNV	2	TC	GT	Homozygous	14	14	100	0.214286	37.75	intergenic
NODE_17116_length_4913_cov_51.186035 mapping	3513	SNV	1	C	T	Homozygous	12	12	100	0.307692	38.6923	intergenic
NODE_17122_length_13846_cov_55.988804 mapping	9845	SNV	1	C	G	Homozygous	6	11	54.5455	0.333333	38.3333	intron
NODE_17122_length_13846_cov_55.988804 mapping	9892	SNV	1	T	C	Heterozygous	5	11	45.4545	0.2	38.6	intron
NODE_17122_length_13846_cov_55.988804 mapping	9907	SNV	1	A	C	Heterozygous	4	11	36.3636	0.25	36.75	intron
NODE_17122_length_13846_cov_55.988804 mapping	9912	SNV	1	G	A	Homozygous	11	11	100	0.454545	35.6364	intron
NODE_17122_length_13846_cov_55.988804 mapping	9931	SNV	1	C	A	Heterozygous	4	10	40	0.25	35.75	intron
NODE_17204_length_15260_cov_54.436436 mapping	1521	SNV	1	T	C	Homozygous	10	10	100	0.25	37.6667	intron
NODE_17204_length_15260_cov_54.436436 mapping	1675	SNV	1	G	T	Homozygous	10	10	100	0.4	38.6	intron
NODE_17204_length_15260_cov_54.436436 mapping	1678	SNV	1	G	A	Homozygous	10	10	100	0.4	38.4	intron
NODE_17204_length_15260_cov_54.436436 mapping	1734	SNV	1	G	A	Homozygous	10	10	100	0.4	38.1	intron
NODE_17204_length_15260_cov_54.436436 mapping	1763	SNV	1	T	C	Homozygous	11	11	100	0.454545	38.4545	intron
NODE_17204_length_15260_cov_54.436436 mapping	1765	MNV	2	GC	AT	Homozygous	11	11	100	0.454545	33.8636	intron
NODE_17204_length_15260_cov_54.436436 mapping	1768	SNV	1	C	A	Homozygous	11	11	100	0.454545	39	intron
NODE_17204_length_15260_cov_54.436436 mapping	1802	SNV	1	C	T	Homozygous	10	10	100	0.2	33.5	intron
NODE_17204_length_15260_cov_54.436436 mapping	1817	SNV	1	T	A	Homozygous	10	10	100	0.3	32.5	intron
NODE_17204_length_15260_cov_54.436436 mapping	1859	SNV	1	C	T	Homozygous	10	10	100	0.2	35.1	intron
NODE_17204_length_15260_cov_54.436436 mapping	1878	SNV	1	G	C	Homozygous	11	11	100	0.181818	36.8182	intron
NODE_17204_length_15260_cov_54.436436 mapping	7707	SNV	1	A	G	Homozygous	10	10	100	0.4	37.3	intron
NODE_17204_length_15260_cov_54.436436 mapping	10896	Deletion	1	T	-	Homozygous	13	13	100	0.307692	36.1538	intron
NODE_17204_length_15260_cov_54.436436 mapping	10930	SNV	1	C	T	Homozygous	11	12	91.6667	0.181818	38.4545	intron
NODE_17204_length_15260_cov_54.436436 mapping	11025	SNV	1	A	T	Homozygous	11	11	100	0.363636	36.9091	intron
NODE_17204_length_15260_cov_54.436436 mapping	11029	SNV	1	G	C	Homozygous	11	11	100	0.363636	38.5455	intron
NODE_17204_length_15260_cov_54.436436 mapping	11033	SNV	1	A	T	Homozygous	10	10	100	0.3	38.7	intron
NODE_17204_length_15260_cov_54.436436 mapping	11048	SNV	1	A	G	Homozygous	10	10	100	0.4	38.5	intron
NODE_17204_length_15260_cov_54.436436 mapping	13652	SNV	1	T	G	Homozygous	10	10	100	0.3	32.4	intron
NODE_17204_length_15260_cov_54.436436 mapping	13667	SNV	1	T	C	Homozygous	10	10	100	0.3	37.7	intron
NODE_17204_length_15260_cov_54.436436 mapping	13725	SNV	1	G	A	Homozygous	11	11	100	0.272727	35.5455	exon
NODE_3142_length_170306_cov_13.933878 mapping	20532	SNV	1	G	A	Homozygous	10	10	100	0.4	39.6	intron
NODE_3142_length_170306_cov_13.933878 mapping	20539	SNV	1	C	A	Homozygous	10	10	100	0.4	39.9	intron
NODE_3142_length_170306_cov_13.933878 mapping	22010	SNV	1	A	G	Homozygous	12	12	100	0.461538	39.5385	exon
NODE_3142_length_170306_cov_13.933878 mapping	22066	SNV	1	C	T	Homozygous	11	11	100	0.454545	34.1818	exon
NODE_3142_length_170306_cov_13.933878 mapping	46658	SNV	1	T	C	Heterozygous	4	10	40	0.25	38.75	intron
NODE_3142_length_170306_cov_13.933878 mapping	70735	SNV	1	A	G	Homozygous	10	10	100	0.2	37.7	intron
NODE_3142_length_170306_cov_13.933878 mapping	70742	SNV	1	G	T	Homozygous	10	10	100	0.2	38.6	intron
NODE_3142_length_170306_cov_13.933878 mapping	70753	SNV	1	C	T	Homozygous	10	10	100	0.2	36.3	intron
NODE_3142_length_170306_cov_13.933878 mapping	81268	SNV	1	T	C	Homozygous	11	11	100	0.454545	36.5455	exon
NODE_3142_length_170306_cov_13.933878 mapping	81339	SNV	1	C	T	Homozygous	12	12	100	0.166667	37.8333	exon
NODE_3142_length_170306_cov_13.933878 mapping	81344	SNV	1	G	A	Homozygous	11	11	100	0.181818	37.2727	exon
NODE_3142_length_170306_cov_13.933878 mapping	81413	SNV	1	T	A	Homozygous	13	13	100	0.307692	38.5385	exon
NODE_3142_length_170306_cov_13.933878 mapping	81421	SNV	1	G	A	Homozygous	14	14	100	0.357143	38.0714	exon
NODE_3142_length_170306_cov_13.933878 mapping	81643	SNV	1	G	A	Homozygous	10	10	100	0.5	36.5	exon
NODE_3142_length_170306_cov_13.933878 mapping	83819	SNV	1	G	T	Homozygous	10	10	100	0.4	35.9	intron
NODE_3142_length_170306_cov_13.933878 mapping	83831	MNV	2	TA	GC	Homozygous	10	10	100	0.4	35.6	intron
NODE_3142_length_170306_cov_13.933878 mapping	86890	Insertion	1	-	A	Homozygous	10	10	100	0.4	39.7	intron
NODE_3142_length_170306_cov_13.933878 mapping	86894	SNV	1	T	G	Homozygous	10	10	100	0.4	39.8	intron
NODE_3142_length_170306_cov_13.933878 mapping	86901	SNV	1	T	C	Homozygous	10	10	100	0.4	39.9	intron
NODE_3142_length_170306_cov_13.933878 mapping	86921	SNV	1	T	C	Homozygous	13	13	100	0.461538	37.0769	intron
NODE_3142_length_170306_cov_13.933878 mapping	86925	SNV	1	A	G	Homozygous	14	14	100	0.428571	38.5	intron
NODE_3142_length_170306_cov_13.933878 mapping	86930	SNV	1	G	A	Homozygous	16	16	100	0.375	36.5625	intron
NODE_3142_length_170306_cov_13.933878 mapping	86935	SNV	1	A	G	Homozygous	16	16	100	0.375	36.625	intron
NODE_3142_length_170306_cov_13.933878 mapping	86942	SNV	1	T	A	Homozygous	13	13	100	0.307692	35.8462	intron
NODE_3142_length_170306_cov_13.933878 mapping	86944	SNV	1	A	G	Homozygous	13	13	100	0.307692	35.6923	intron
NODE_3142_length_170306_cov_13.933878 mapping	86961	Insertion	4	-	ATCT	Heterozygous	6	12	50	0.5	38.6667	intron
NODE_3142_length_170306_cov_13.933878 mapping	86997	SNV	1	T	A	Homozygous	14	14	100	0.357143	37.1429	intron
NODE_3142_length_170306_cov_13.933878 mapping	87007	SNV	1	G	A	Homozygous	14	14	100	0.285714	35.2857	intron
NODE_3142_length_170306_cov_13.933878 mapping	87019	SNV	1	A	G	Homozygous	11	11	100	0.272727	38.8182	intron
NODE_3142_length_170306_cov_13.933878 mapping	87094	SNV	1	T	G	Homozygous	10	10	100	0.2	36.9	intron
NODE_3142_length_170306_cov_13.933878 mapping	87101	SNV	1	A	G	Homozygous	11	11	100	0.0909091	33.3636	intron
NODE_3142_length_170306_cov_13.933878 mapping	87114	SNV	1	G	A	Homozygous	15	15	100	0.133333	38.0667	intron
NODE_3142_length_170306_cov_13.933878 mapping	87116	SNV	1	C	A	Homozygous	15	15	100	0.133333	37.6667	intron
NODE_3142_length_170306_cov_13.933878 mapping	87121	SNV	1	G	A	Homozygous	15	15	100	0.133333	36.1333	intron
NODE_3142_length_170306_cov_13.933878 mapping	87146	SNV	1	A	T	Homozygous	15	15	100	0.133333	37.9333	intron
NODE_3142_length_170306_cov_13.933878 mapping	109301	SNV	1	T	C	Homozygous	10	10	100	0.454545	36.8182	intron
NODE_3142_length_170306_cov_13.933878 mapping	109318	SNV	1	T	C	Homozygous	11	11	100	0.5	35.8333	intron
NODE_3142_length_170306_cov_13.933878 mapping	109339	SNV	1	A	G	Homozygous	10	11	90.9091	0.4	37.7	intron
NODE_3142_length_170306_cov_13.933878 mapping	109343	SNV	1	C	A	Homozygous	12	12	100	0.5	38.25	intron
NODE_3142_length_170306_cov_13.933878 mapping	109350	SNV	1	A	G	Homozygous	13	13	100	0.461538	37.5385	intron
NODE_3142_length_170306_cov_13.933878 mapping	109362	SNV	1	A	G	Homozygous	13	13	100	0.461538	35.9231	intron
NODE_3142_length_170306_cov_13.933878 mapping	109380	Deletion	3	TCT	-	Heterozygous	8	12	66.6667	0.375	34.625	intron
NODE_3142_length_170306_cov_13.933878 mapping	109429	SNV	1	T	C	Homozygous	10	10	100	0.4	34.3	intron
NODE_3142_length_170306_cov_13.933878 mapping	109437	SNV	1	G	A	Homozygous	9	10	90	0.444444	35.5556	intron
NODE_3142_length_170306_cov_13.933878 mapping	109513	SNV	1	C	G	Homozygous	17	17	100	0.411765	38.2941	intron
NODE_3142_length_170306_cov_13.933878 mapping	109589	SNV	1	A	G	Homozygous	12	12	100	0.25	33.3333	intron
NODE_3142_length_170306_cov_13.933878 mapping	109597	SNV	1	C	A	Homozygous	13	13	100	0.153846	35.9231	intron
NODE_3142_length_170306_cov_13.933878 mapping	109604	SNV	1	C	T	Homozygous	10	10	100	0.2	30.5	intron
NODE_3142_length_170306_cov_13.933878 mapping	109636	SNV	1	A	T	Homozygous	12	12	100	0.416667	37	intron
NODE_3142_length_170306_cov_13.933878 mapping	109644	SNV	1	T	A	Homozygous	16	16	100	0.3125	34.375	intron
NODE_3142_length_170306_cov_13.933878 mapping	109651	SNV	1	G	A	Homozygous	18	18	100	0.388889	39	intron
NODE_3142_length_170306_cov_13.933878 mapping	109654	SNV	1	A	T	Homozygous	17	18	94.4444	0.352941	39.2353	intron
NODE_3142_length_170306_cov_13.933878 mapping	109662	SNV	1	A	G	Homozygous	20	20	100	0.4	34.65	intron
NODE_3142_length_170306_cov_13.933878 mapping	109665	SNV	1	T	C	Homozygous	20	20	100	0.4	36.35	intron
NODE_3142_length_170306_cov_13.933878 mapping	109690	SNV	1	G	A	Homozygous	16	16	100	0.375	37.9375	intron
NODE_3142_length_170306_cov_13.933878 mapping	109700	MNV	2	TG	GA	Homozygous	19	19	100	0.368421	35.6579	intron
NODE_3142_length_170306_cov_13.933878 mapping	109714	SNV	1	G	A	Homozygous	18	18	100	0.388889	35	intron
NODE_3142_length_170306_cov_13.933878 mapping	109732	SNV	1	G	A	Homozygous	18	18	100	0.444444	37.1111	intron
NODE_3142_length_170306_cov_13.933878 mapping	109752	SNV	1	T	C	Homozygous	12	12	100	0.333333	37.3333	intron
NODE_3142_length_170306_cov_13.933878 mapping	109754	Replacement	2	GT	A	Homozygous	12	12	100	0.333333	34.6667	intron
NODE_3142_length_170306_cov_13.933878 mapping	109770	SNV	1	C	A	Homozygous	14	14	100	0.357143	35.3571	intron
NODE_3142_length_170306_cov_13.933878 mapping	109817	SNV	1	A	G	Homozygous	12	13	92.3077	0.166667	36.5	intron
NODE_3142_length_170306_cov_13.933878 mapping	109823	SNV	1	A	T	Homozygous	12	13	92.3077	0.166667	37.1667	intron
NODE_3142_length_170306_cov_13.933878 mapping	109830	SNV	1	G	C	Homozygous	13	13	100	0.153846	34.8462	intron
NODE_3142_length_170306_cov_13.933878 mapping	109842	SNV	1	T	C	Homozygous	12	12	100	0.0833333	38.8333	intron
NODE_3142_length_170306_cov_13.933878 mapping	116586	SNV	1	T	C	Homozygous	11	11	100	0.454545	39.0909	intron
NODE_3142_length_170306_cov_13.933878 mapping	116591	SNV	1	G	T	Homozygous	11	11	100	0.454545	33.1818	intron
NODE_3142_length_170306_cov_13.933878 mapping	116606	SNV	1	C	T	Homozygous	12	12	100	0.5	36.0833	intron
NODE_3142_length_170306_cov_13.933878 mapping	116620	SNV	1	C	G	Homozygous	12	12	100	0.5	34.9167	intron
NODE_3142_length_170306_cov_13.933878 mapping	116639	SNV	1	A	C	Homozygous	10	10	100	0.5	33.3	intron
NODE_3142_length_170306_cov_13.933878 mapping	116721	SNV	1	T	C	Homozygous	11	11	100	0.0909091	38.2727	intron
NODE_3142_length_170306_cov_13.933878 mapping	116915	SNV	1	A	C	Homozygous	10	10	100	0.2	36.9	intron
NODE_3142_length_170306_cov_13.933878 mapping	123378	SNV	1	A	T	Homozygous	10	10	100	0.5	34.1	exon
NODE_3142_length_170306_cov_13.933878 mapping	123389	SNV	1	G	A	Homozygous	10	10	100	0.3	37	exon
NODE_3142_length_170306_cov_13.933878 mapping	124062	SNV	1	A	T	Homozygous	10	10	100	0.4	36.3	intron
NODE_3142_length_170306_cov_13.933878 mapping	124076	SNV	1	T	C	Homozygous	10	10	100	0.4	35.8	intron
NODE_3142_length_170306_cov_13.933878 mapping	127365	SNV	1	A	G	Homozygous	10	10	100	0.454545	37.6364	intron
NODE_3142_length_170306_cov_13.933878 mapping	127375	SNV	1	A	T	Homozygous	10	10	100	0.454545	37.7273	intron
NODE_3142_length_170306_cov_13.933878 mapping	127405	SNV	1	A	C	Homozygous	12	12	100	0.5	38.5	intron
NODE_3142_length_170306_cov_13.933878 mapping	127409	MNV	2	AC	TT	Homozygous	11	11	100	0.454545	39.5	intron
NODE_3142_length_170306_cov_13.933878 mapping	160690	SNV	1	T	A	Homozygous	11	11	100	0.0909091	35.9091	exon
NODE_3142_length_170306_cov_13.933878 mapping	168459	SNV	1	C	T	Homozygous	10	10	100	0.2	40.2	intergenic
NODE_3142_length_170306_cov_13.933878 mapping	168651	SNV	1	A	G	Homozygous	10	10	100	0.1	37.9	intergenic
NODE_3142_length_170306_cov_13.933878 mapping	168683	SNV	1	T	G	Homozygous	11	11	100	0.0909091	39.5455	intergenic
NODE_3142_length_170306_cov_13.933878 mapping	168685	SNV	1	A	G	Homozygous	11	11	100	0.0909091	39.5455	intergenic
NODE_17305_length_2709_cov_80.312294 mapping	552	SNV	1	A	C	Homozygous	11	11	100	0.454545	38.2727	intergenic
NODE_17324_length_1000_cov_4473.794922 mapping	265	SNV	1	C	A	Homozygous	228	237	96.2025	0.447826	33.9913	exon
NODE_15730_length_15293_cov_24.503040 mapping	9257	Insertion	1	-	T	Homozygous	10	12	83.3333	0.4	40.2	intergenic
NODE_15730_length_15293_cov_24.503040 mapping	9258	SNV	1	G	T	Heterozygous	7	10	70	0.428571	40.5714	intergenic
NODE_15730_length_15293_cov_24.503040 mapping	9258	SNV	1	G	C	Heterozygous	3	10	30	0.333333	39.3333	intergenic
NODE_15730_length_15293_cov_24.503040 mapping	9260	SNV	1	G	T	Heterozygous	3	10	30	0.333333	39	intergenic
NODE_15730_length_15293_cov_24.503040 mapping	9281	SNV	1	T	A	Homozygous	9	10	90	0.444444	39.3333	intergenic
NODE_15730_length_15293_cov_24.503040 mapping	9293	SNV	1	C	A	Homozygous	7	10	70	0.285714	40.5714	intergenic
NODE_15730_length_15293_cov_24.503040 mapping	9425	SNV	1	C	T	Heterozygous	5	10	50	0.5	37.5	intergenic
NODE_15730_length_15293_cov_24.503040 mapping	9437	SNV	1	A	T	Heterozygous	6	13	46.1538	0.333333	39.5	intergenic
NODE_15730_length_15293_cov_24.503040 mapping	9441	SNV	1	T	A	Heterozygous	6	12	50	0.285714	39.2857	intergenic
NODE_15730_length_15293_cov_24.503040 mapping	9448	MNV	2	AA	TT	Heterozygous	5	11	45.4545	0.2	40.5	intergenic
NODE_15730_length_15293_cov_24.503040 mapping	9449	SNV	1	A	T	Heterozygous	6	11	54.5455	0.333333	37.9167	intergenic
NODE_15730_length_15293_cov_24.503040 mapping	9476	SNV	1	T	C	Heterozygous	4	10	40	0.5	38.5	intergenic
NODE_15730_length_15293_cov_24.503040 mapping	9961	SNV	1	T	G	Heterozygous	4	10	40	0.5	40	intergenic
NODE_15730_length_15293_cov_24.503040 mapping	10813	Replacement	2	G	TA	Heterozygous	7	13	53.8462	0.285714	37.9286	intergenic
NODE_15730_length_15293_cov_24.503040 mapping	10817	SNV	1	T	C	Homozygous	14	14	100	0.5	37.2857	intergenic
NODE_15730_length_15293_cov_24.503040 mapping	10823	SNV	1	C	T	Heterozygous	6	13	46.1538	0.166667	38.6667	intergenic
NODE_15730_length_15293_cov_24.503040 mapping	10826	SNV	1	T	G	Homozygous	12	12	100	0.416667	37.4167	intergenic
NODE_15730_length_15293_cov_24.503040 mapping	10835	SNV	1	C	G	Homozygous	13	13	100	0.384615	35.0769	intergenic
NODE_15730_length_15293_cov_24.503040 mapping	10848	SNV	1	C	A	Heterozygous	5	11	45.4545	0.2	38.2	intergenic
NODE_15730_length_15293_cov_24.503040 mapping	10854	SNV	1	A	G	Heterozygous	7	12	58.3333	0.428571	39.1429	intergenic
NODE_15730_length_15293_cov_24.503040 mapping	10859	SNV	1	G	A	Heterozygous	5	13	38.4615	0.2	37.4	intergenic
NODE_15730_length_15293_cov_24.503040 mapping	10862	SNV	1	T	C	Heterozygous	7	15	46.6667	0.142857	35.2632	intergenic
NODE_15730_length_15293_cov_24.503040 mapping	10863	MNV	2	AA	GT	Heterozygous	8	15	53.3333	0.375	37.7917	intergenic
NODE_15730_length_15293_cov_24.503040 mapping	10885	SNV	1	A	G	Heterozygous	6	13	46.1538	0.166667	39	intergenic
NODE_15730_length_15293_cov_24.503040 mapping	10896	Deletion	1	C	-	Heterozygous	8	13	61.5385	0.25	38.5	intergenic
NODE_15730_length_15293_cov_24.503040 mapping	10896	SNV	1	C	T	Heterozygous	5	13	38.4615	0.4	39.4	intergenic
NODE_15730_length_15293_cov_24.503040 mapping	10901	SNV	1	G	A	Heterozygous	8	14	57.1429	0.25	37	intergenic
NODE_15730_length_15293_cov_24.503040 mapping	10905	SNV	1	T	A	Heterozygous	5	12	41.6667	0.2	36.6	intergenic
NODE_15730_length_15293_cov_24.503040 mapping	10910	Insertion	1	-	A	Heterozygous	5	12	41.6667	0.2	39.8	intergenic
NODE_15730_length_15293_cov_24.503040 mapping	10928	SNV	1	T	G	Heterozygous	4	10	40	0.25	40.5	intergenic
NODE_15730_length_15293_cov_24.503040 mapping	10936	SNV	1	G	A	Heterozygous	6	11	54.5455	0.166667	37.8333	intergenic
NODE_15730_length_15293_cov_24.503040 mapping	10936	Deletion	1	G	-	Heterozygous	5	11	45.4545	0.4	38.4	intergenic
NODE_15730_length_15293_cov_24.503040 mapping	10941	SNV	1	A	T	Heterozygous	6	11	54.5455	0.166667	36.6667	intergenic
NODE_15730_length_15293_cov_24.503040 mapping	11025	SNV	1	A	G	Homozygous	11	11	100	0.454545	37.6364	intergenic
NODE_15730_length_15293_cov_24.503040 mapping	11029	SNV	1	T	A	Heterozygous	5	11	45.4545	0.2	38.2	intergenic
NODE_15730_length_15293_cov_24.503040 mapping	11047	SNV	1	G	A	Heterozygous	7	13	53.8462	0.142857	39.1429	intergenic
NODE_15730_length_15293_cov_24.503040 mapping	11052	SNV	1	A	G	Heterozygous	7	13	53.8462	0.142857	39.1429	intergenic
NODE_15730_length_15293_cov_24.503040 mapping	11053	Deletion	1	T	-	Heterozygous	5	13	38.4615	0.4	40.4	intergenic
NODE_15730_length_15293_cov_24.503040 mapping	11057	SNV	1	A	G	Homozygous	12	13	92.3077	0.333333	39.5833	intergenic
NODE_15730_length_15293_cov_24.503040 mapping	11066	SNV	1	A	C	Heterozygous	7	12	58.3333	0.142857	37.5714	intergenic
NODE_15730_length_15293_cov_24.503040 mapping	11068	SNV	1	T	A	Homozygous	12	12	100	0.333333	39.9167	intergenic
NODE_15730_length_15293_cov_24.503040 mapping	11093	SNV	1	T	A	Heterozygous	7	15	46.6667	0.142857	39.1429	intergenic
NODE_12356_length_86773_cov_14.588374 mapping	22019	SNV	1	C	A	Homozygous	11	11	100	0.363636	38.3636	intergenic
NODE_12356_length_86773_cov_14.588374 mapping	22030	Deletion	2	AG	-	Homozygous	11	11	100	0.363636	35.6364	intergenic
NODE_12356_length_86773_cov_14.588374 mapping	22033	SNV	1	T	C	Homozygous	11	11	100	0.363636	38.8182	intergenic
NODE_12356_length_86773_cov_14.588374 mapping	22035	SNV	1	A	G	Homozygous	11	11	100	0.363636	38.3636	intergenic
NODE_17950_length_25331_cov_54.787376 mapping	2400	SNV	1	T	C	Homozygous	11	11	100	0.272727	37.2727	intergenic
NODE_17950_length_25331_cov_54.787376 mapping	2412	SNV	1	A	T	Homozygous	7	11	63.6364	0.428571	37.1429	intergenic
NODE_17950_length_25331_cov_54.787376 mapping	2418	MNV	2	GA	AC	Homozygous	10	10	100	0.2	36.35	intergenic
NODE_17950_length_25331_cov_54.787376 mapping	2427	Deletion	1	A	-	Heterozygous	7	10	70	0.142857	39.7143	intergenic
NODE_17950_length_25331_cov_54.787376 mapping	2427	SNV	1	A	G	Heterozygous	3	10	30	0.333333	35.3333	intergenic
NODE_17950_length_25331_cov_54.787376 mapping	2429	Deletion	1	A	-	Heterozygous	7	10	70	0.142857	38.5714	intergenic
NODE_17950_length_25331_cov_54.787376 mapping	2572	SNV	1	A	G	Homozygous	10	10	100	0.1	35.9	intergenic
NODE_17950_length_25331_cov_54.787376 mapping	2576	SNV	1	C	A	Homozygous	10	10	100	0.1	37	intergenic
NODE_17950_length_25331_cov_54.787376 mapping	2592	SNV	1	A	G	Homozygous	5	10	50	0.2	37.8	intergenic
NODE_17950_length_25331_cov_54.787376 mapping	3675	SNV	1	A	C	Homozygous	10	10	100	0.5	38.5	intergenic
NODE_17950_length_25331_cov_54.787376 mapping	3679	Insertion	1	-	A	Homozygous	8	10	80	0.375	38.25	intergenic
NODE_17950_length_25331_cov_54.787376 mapping	3732	SNV	1	C	T	Homozygous	10	10	100	0.3	35.5	intergenic
NODE_17950_length_25331_cov_54.787376 mapping	3738	SNV	1	T	C	Homozygous	10	10	100	0.3	35.7	intergenic
NODE_17950_length_25331_cov_54.787376 mapping	3857	SNV	1	C	A	Homozygous	11	11	100	0.363636	35.0909	intergenic
NODE_17950_length_25331_cov_54.787376 mapping	3888	SNV	1	T	C	Homozygous	11	11	100	0.454545	37.1818	intergenic
NODE_17950_length_25331_cov_54.787376 mapping	3892	SNV	1	C	T	Homozygous	11	11	100	0.454545	35.3636	intergenic
NODE_17950_length_25331_cov_54.787376 mapping	3904	MNV	3	GAA	TGT	Homozygous	11	11	100	0.454545	38.2727	intergenic
NODE_17950_length_25331_cov_54.787376 mapping	3911	SNV	1	C	A	Homozygous	11	11	100	0.454545	37.3636	intergenic
NODE_17950_length_25331_cov_54.787376 mapping	3921	SNV	1	C	T	Homozygous	10	10	100	0.4	38.6	intergenic
NODE_17950_length_25331_cov_54.787376 mapping	3923	SNV	1	T	A	Homozygous	10	10	100	0.4	38	intergenic
NODE_17950_length_25331_cov_54.787376 mapping	3933	SNV	1	C	T	Homozygous	11	11	100	0.454545	37.6364	intergenic
NODE_17950_length_25331_cov_54.787376 mapping	3956	SNV	1	C	A	Homozygous	10	10	100	0.3	39	intergenic
NODE_17950_length_25331_cov_54.787376 mapping	3965	SNV	1	C	A	Homozygous	10	10	100	0.2	38.2	intergenic
NODE_17950_length_25331_cov_54.787376 mapping	3970	SNV	1	G	A	Heterozygous	2	10	20	0.5	36.5	intergenic
NODE_17950_length_25331_cov_54.787376 mapping	3973	SNV	1	A	C	Homozygous	10	10	100	0.3	36.6	intergenic
NODE_17950_length_25331_cov_54.787376 mapping	3993	SNV	1	T	C	Homozygous	11	11	100	0.363636	37.7273	intergenic
NODE_17950_length_25331_cov_54.787376 mapping	5254	SNV	1	A	G	Heterozygous	5	11	45.4545	0.2	36.8	intergenic
NODE_17950_length_25331_cov_54.787376 mapping	5258	SNV	1	A	G	Homozygous	10	10	100	0.2	39.5	intergenic
NODE_17950_length_25331_cov_54.787376 mapping	5266	SNV	1	T	A	Heterozygous	5	10	50	0.2	38.8	intergenic
NODE_17950_length_25331_cov_54.787376 mapping	5296	SNV	1	A	T	Homozygous	11	11	100	0.363636	34.8182	intergenic
NODE_17950_length_25331_cov_54.787376 mapping	5306	SNV	1	C	T	Homozygous	11	11	100	0.272727	35.8182	intergenic
NODE_17950_length_25331_cov_54.787376 mapping	5351	SNV	1	T	C	Homozygous	9	11	81.8182	0.111111	36.7778	intergenic
NODE_17950_length_25331_cov_54.787376 mapping	5364	SNV	1	G	T	Homozygous	10	10	100	0.1	37.8	intergenic
NODE_17950_length_25331_cov_54.787376 mapping	5366	SNV	1	G	T	Homozygous	10	10	100	0.1	37.4	intergenic
NODE_17950_length_25331_cov_54.787376 mapping	5938	SNV	1	C	G	Homozygous	7	10	70	0.285714	38.5714	intergenic
NODE_17950_length_25331_cov_54.787376 mapping	5945	SNV	1	C	T	Homozygous	10	10	100	0.5	37.9	intergenic
NODE_17950_length_25331_cov_54.787376 mapping	6077	SNV	1	T	A	Homozygous	11	11	100	0.454545	39	intergenic
NODE_17950_length_25331_cov_54.787376 mapping	6086	SNV	1	C	A	Homozygous	12	12	100	0.416667	38.0833	intergenic
NODE_17950_length_25331_cov_54.787376 mapping	6267	SNV	1	A	G	Homozygous	10	11	90.9091	0.4	38.1	intergenic
NODE_17950_length_25331_cov_54.787376 mapping	6285	SNV	1	G	A	Homozygous	10	10	100	0.4	38.4	intergenic
NODE_17950_length_25331_cov_54.787376 mapping	8186	SNV	1	C	T	Heterozygous	5	10	50	0.4	35.4	intergenic
NODE_17950_length_25331_cov_54.787376 mapping	8188	Deletion	1	A	-	Heterozygous	5	10	50	0.4	39.8	intergenic
NODE_17950_length_25331_cov_54.787376 mapping	8221	SNV	1	C	A	Homozygous	10	10	100	0.5	38.3	intergenic
NODE_17950_length_25331_cov_54.787376 mapping	8681	SNV	1	A	C	Homozygous	10	10	100	0.1	36.6	intergenic
NODE_17950_length_25331_cov_54.787376 mapping	8837	SNV	1	C	T	Heterozygous	6	12	50	0.333333	36.5	intergenic
NODE_17950_length_25331_cov_54.787376 mapping	8840	SNV	1	T	C	Homozygous	12	12	100	0.416667	36.9167	intergenic
NODE_17950_length_25331_cov_54.787376 mapping	8846	SNV	1	C	A	Homozygous	12	12	100	0.333333	37.4167	intergenic
NODE_17950_length_25331_cov_54.787376 mapping	9524	Deletion	1	T	-	Homozygous	11	11	100	0.363636	38	intergenic
NODE_17950_length_25331_cov_54.787376 mapping	9548	SNV	1	C	T	Homozygous	11	11	100	0.363636	38.7273	intergenic
NODE_17950_length_25331_cov_54.787376 mapping	9550	SNV	1	G	A	Homozygous	11	11	100	0.363636	38.6364	intergenic
NODE_17950_length_25331_cov_54.787376 mapping	9561	Insertion	1	-	T	Homozygous	10	13	76.9231	0.4	39	intergenic
NODE_17950_length_25331_cov_54.787376 mapping	9565	SNV	1	G	A	Homozygous	10	10	100	0.4	37.5	intergenic
NODE_17950_length_25331_cov_54.787376 mapping	9571	SNV	1	C	A	Heterozygous	4	11	36.3636	0.25	40.25	intergenic
NODE_17950_length_25331_cov_54.787376 mapping	9705	SNV	1	C	T	Homozygous	8	11	72.7273	0.25	37.625	intergenic
NODE_17950_length_25331_cov_54.787376 mapping	9741	SNV	1	T	G	Homozygous	11	11	100	0.272727	39.0909	intergenic
NODE_17950_length_25331_cov_54.787376 mapping	9751	SNV	1	G	T	Homozygous	10	10	100	0.3	35.8	intergenic
NODE_17950_length_25331_cov_54.787376 mapping	9774	SNV	1	T	A	Homozygous	13	13	100	0.307692	35.6154	intergenic
NODE_17950_length_25331_cov_54.787376 mapping	9776	SNV	1	T	A	Homozygous	13	13	100	0.307692	38.8462	intergenic
NODE_17950_length_25331_cov_54.787376 mapping	9780	SNV	1	T	G	Heterozygous	5	13	38.4615	0.2	40.2	intergenic
NODE_17950_length_25331_cov_54.787376 mapping	9790	SNV	1	A	C	Homozygous	13	13	100	0.307692	38.5385	intergenic
NODE_17950_length_25331_cov_54.787376 mapping	9810	SNV	1	C	A	Homozygous	12	12	100	0.25	40.0833	intergenic
NODE_17950_length_25331_cov_54.787376 mapping	9814	SNV	1	T	G	Homozygous	12	12	100	0.25	36.1667	intergenic
NODE_17950_length_25331_cov_54.787376 mapping	20110	SNV	1	C	A	Homozygous	10	10	100	0.2	38.7	intron
NODE_17950_length_25331_cov_54.787376 mapping	20316	SNV	1	G	A	Homozygous	10	10	100	0.2	38.7	intron
NODE_17950_length_25331_cov_54.787376 mapping	23786	Insertion	1	-	T	Homozygous	9	10	90	0.2	39	intergenic
NODE_18357_length_3001_cov_52.027657 mapping	1819	SNV	1	T	A	Heterozygous	5	10	50	0.2	39.6	intergenic
NODE_18556_length_2205_cov_49.005898 mapping	1384	SNV	1	T	C	Homozygous	10	10	100	0.5	39	intergenic
NODE_18556_length_2205_cov_49.005898 mapping	1425	SNV	1	G	A	Homozygous	9	10	90	0.333333	40.3333	intergenic
NODE_13789_length_87968_cov_19.697777 mapping	5217	SNV	1	A	G	Heterozygous	4	11	36.3636	0.25	40.875	intergenic
NODE_13789_length_87968_cov_19.697777 mapping	5217	MNV	2	AG	GT	Heterozygous	2	11	18.1818	0	34.25	intergenic
NODE_13789_length_87968_cov_19.697777 mapping	5221	SNV	1	T	G	Heterozygous	5	11	45.4545	0.285714	37.4286	intergenic
NODE_13789_length_87968_cov_19.697777 mapping	5224	SNV	1	A	T	Homozygous	10	11	90.9091	0.384615	37.0769	intergenic
NODE_13789_length_87968_cov_19.697777 mapping	5241	Deletion	1	G	-	Homozygous	11	15	73.3333	0.47619	36.4286	intergenic
NODE_13789_length_87968_cov_19.697777 mapping	5254	MNV	2	GC	CA	Homozygous	16	16	100	0.375	37.75	intergenic
NODE_13789_length_87968_cov_19.697777 mapping	5260	MNV	2	AG	TT	Heterozygous	9	16	56.25	0.444444	35.7647	intergenic
NODE_13789_length_87968_cov_19.697777 mapping	5260	MNV	2	AG	TA	Heterozygous	7	16	43.75	0.285714	40.3571	intergenic
NODE_13789_length_87968_cov_19.697777 mapping	5264	MNV	2	AC	TT	Homozygous	16	16	100	0.375	37.1875	intergenic
NODE_13789_length_87968_cov_19.697777 mapping	5298	SNV	1	T	C	Homozygous	15	18	83.3333	0.423077	35.2308	intergenic
NODE_13789_length_87968_cov_19.697777 mapping	5300	SNV	1	C	T	Homozygous	14	18	77.7778	0.416667	36.8333	intergenic
NODE_13789_length_87968_cov_19.697777 mapping	5304	Insertion	1	-	C	Heterozygous	10	18	55.5556	0.375	36.5	intergenic
NODE_13789_length_87968_cov_19.697777 mapping	5306	SNV	1	A	T	Homozygous	11	12	91.6667	0.352941	37.4118	intergenic
NODE_13789_length_87968_cov_19.697777 mapping	5308	SNV	1	A	C	Homozygous	11	12	91.6667	0.352941	38.5882	intergenic
NODE_13789_length_87968_cov_19.697777 mapping	5312	Deletion	1	A	-	Homozygous	12	12	100	0.333333	36.4444	intergenic
NODE_13789_length_87968_cov_19.697777 mapping	5315	SNV	1	T	C	Heterozygous	6	12	50	0.4	36.3	intergenic
NODE_13789_length_87968_cov_19.697777 mapping	5316	SNV	1	G	T	Heterozygous	5	12	41.6667	0.166667	38.3333	intergenic
NODE_18759_length_2244_cov_33.861408 mapping	324	SNV	1	C	A	Homozygous	106	106	100	0.196262	38.6542	intergenic
NODE_18759_length_2244_cov_33.861408 mapping	333	SNV	1	G	T	Heterozygous	54	102	52.9412	0.272727	39.1818	intergenic
NODE_18759_length_2244_cov_33.861408 mapping	371	SNV	1	C	T	Heterozygous	94	157	59.8726	0.46875	38.6667	intergenic
NODE_18759_length_2244_cov_33.861408 mapping	394	SNV	1	C	A	Heterozygous	43	184	23.3696	0.186047	37	intergenic
NODE_18759_length_2244_cov_33.861408 mapping	407	SNV	1	A	C	Homozygous	166	189	87.8307	0.349398	38.759	intergenic
NODE_18759_length_2244_cov_33.861408 mapping	428	SNV	1	T	C	Homozygous	214	226	94.6903	0.319444	38.7269	intergenic
NODE_18759_length_2244_cov_33.861408 mapping	447	SNV	1	C	A	Heterozygous	120	227	52.8634	0.347107	38.7025	intergenic
NODE_18759_length_2244_cov_33.861408 mapping	457	Insertion	1	-	T	Heterozygous	107	210	50.9524	0.233645	37.6291	intergenic
NODE_18759_length_2244_cov_33.861408 mapping	457	Insertion	2	-	TT	Heterozygous	103	210	49.0476	0.38835	38.3107	intergenic
NODE_18759_length_2244_cov_33.861408 mapping	478	SNV	1	T	A	Heterozygous	102	165	61.8182	0.368932	38.6602	intergenic
NODE_18759_length_2244_cov_33.861408 mapping	508	SNV	1	A	G	Heterozygous	31	114	27.193	0.225806	37.2903	intergenic
NODE_18759_length_2244_cov_33.861408 mapping	510	SNV	1	T	A	Heterozygous	65	103	63.1068	0.323077	37.7231	intergenic
NODE_18759_length_2244_cov_33.861408 mapping	536	SNV	1	C	T	Homozygous	33	33	100	0.0606061	39.0606	intergenic
NODE_18759_length_2244_cov_33.861408 mapping	652	SNV	1	T	A	Heterozygous	38	50	76	0.0526316	38.3158	intergenic
NODE_18759_length_2244_cov_33.861408 mapping	675	SNV	1	C	A	Homozygous	12	12	100	0.0833333	37.1667	intergenic
NODE_18759_length_2244_cov_33.861408 mapping	717	SNV	1	T	C	Heterozygous	8	11	72.7273	0.125	39.8667	intergenic
NODE_18759_length_2244_cov_33.861408 mapping	717	MNV	2	TA	CG	Heterozygous	3	11	27.2727	0.333333	30.6667	intergenic
NODE_18759_length_2244_cov_33.861408 mapping	730	SNV	1	A	T	Homozygous	12	12	100	0.166667	39.0833	intergenic
NODE_18759_length_2244_cov_33.861408 mapping	745	SNV	1	T	C	Homozygous	12	12	100	0.0833333	35.9167	intergenic
NODE_18759_length_2244_cov_33.861408 mapping	982	MNV	2	CT	GA	Heterozygous	6	18	33.3333	0.333333	38.8333	intergenic
NODE_18759_length_2244_cov_33.861408 mapping	983	SNV	1	T	A	Heterozygous	3	18	16.6667	0.333333	38.3333	intergenic
NODE_18759_length_2244_cov_33.861408 mapping	985	MNV	2	TG	CA	Homozygous	18	18	100	0.444444	39.0833	intergenic
NODE_18759_length_2244_cov_33.861408 mapping	1010	SNV	1	C	A	Heterozygous	5	14	35.7143	0.2	39	intergenic
NODE_18759_length_2244_cov_33.861408 mapping	1012	SNV	1	A	C	Homozygous	14	14	100	0.428571	36.8571	intergenic
NODE_18759_length_2244_cov_33.861408 mapping	1017	SNV	1	T	A	Heterozygous	6	16	37.5	0.166667	36.8333	intergenic
NODE_18759_length_2244_cov_33.861408 mapping	1073	SNV	1	G	T	Homozygous	11	13	84.6154	0.0909091	37.6364	intergenic
NODE_18759_length_2244_cov_33.861408 mapping	1095	SNV	1	A	T	Homozygous	12	12	100	0.0833333	38.5	intergenic
NODE_18759_length_2244_cov_33.861408 mapping	1104	SNV	1	C	T	Homozygous	13	13	100	0.0769231	35.0769	intergenic
NODE_18759_length_2244_cov_33.861408 mapping	1107	SNV	1	T	A	Homozygous	12	13	92.3077	0.0833333	38.9167	intergenic
NODE_18874_length_23844_cov_31.936756 mapping	4133	SNV	1	A	T	Homozygous	11	11	100	0.5	37.8333	intergenic
NODE_18874_length_23844_cov_31.936756 mapping	4143	MNV	2	CA	AT	Homozygous	12	12	100	0.416667	36.1667	intergenic
NODE_18874_length_23844_cov_31.936756 mapping	4159	SNV	1	A	G	Homozygous	12	12	100	0.416667	36.5	intergenic
NODE_18874_length_23844_cov_31.936756 mapping	4161	SNV	1	G	A	Homozygous	12	12	100	0.416667	34.5833	intergenic
NODE_18874_length_23844_cov_31.936756 mapping	4214	SNV	1	T	A	Homozygous	11	12	91.6667	0.272727	37.5455	intergenic
NODE_18874_length_23844_cov_31.936756 mapping	17347	SNV	1	T	C	Homozygous	10	10	100	0.4	36.2	intergenic
NODE_19074_length_2857_cov_41.991951 mapping	2368	SNV	1	G	A	Homozygous	15	15	100	0.333333	36.0667	intergenic
NODE_19074_length_2857_cov_41.991951 mapping	2372	SNV	1	A	G	Homozygous	14	14	100	0.285714	35.1429	intergenic
NODE_19074_length_2857_cov_41.991951 mapping	2375	SNV	1	A	G	Heterozygous	7	15	46.6667	0.142857	37.5714	intergenic
NODE_19074_length_2857_cov_41.991951 mapping	2391	SNV	1	T	C	Homozygous	14	14	100	0.285714	37.0714	intergenic
NODE_19074_length_2857_cov_41.991951 mapping	2423	SNV	1	T	C	Homozygous	12	12	100	0.416667	36.75	intergenic
NODE_19074_length_2857_cov_41.991951 mapping	2439	SNV	1	A	C	Homozygous	14	14	100	0.357143	36.5714	intergenic
NODE_19074_length_2857_cov_41.991951 mapping	2444	SNV	1	A	C	Homozygous	13	13	100	0.307692	37.1538	intergenic
NODE_19307_length_1020_cov_62.900982 mapping	262	SNV	1	T	A	Homozygous	10	10	100	0.4	35.7	intergenic
NODE_19307_length_1020_cov_62.900982 mapping	293	SNV	1	G	A	Homozygous	10	10	100	0.1	34.6	intergenic
NODE_19307_length_1020_cov_62.900982 mapping	314	SNV	1	T	C	Homozygous	10	10	100	0.1	37.2	intergenic
NODE_19390_length_4839_cov_56.340153 mapping	164	SNV	1	A	T	Heterozygous	3	11	27.2727	0.333333	38.3333	intergenic
NODE_19390_length_4839_cov_56.340153 mapping	198	SNV	1	G	C	Homozygous	11	11	100	0.454545	36.5455	intergenic
NODE_19390_length_4839_cov_56.340153 mapping	223	SNV	1	G	T	Homozygous	10	10	100	0.4	34.4	intergenic
NODE_19390_length_4839_cov_56.340153 mapping	953	SNV	1	A	T	Homozygous	10	10	100	0.5	39	intergenic
NODE_19390_length_4839_cov_56.340153 mapping	971	SNV	1	G	C	Homozygous	10	10	100	0.4	40.2	intergenic
NODE_19390_length_4839_cov_56.340153 mapping	980	SNV	1	G	A	Homozygous	10	10	100	0.4	39.9	intergenic
NODE_19453_length_1536_cov_81.788414 mapping	666	Insertion	1	-	G	Heterozygous	6	11	54.5455	0.333333	37.8333	intergenic
NODE_19453_length_1536_cov_81.788414 mapping	666	SNV	1	A	G	Heterozygous	5	11	45.4545	0.333333	36.1667	intergenic
NODE_19453_length_1536_cov_81.788414 mapping	677	SNV	1	C	T	Heterozygous	4	11	36.3636	0.4	37.4	intergenic
NODE_19453_length_1536_cov_81.788414 mapping	679	SNV	1	T	A	Heterozygous	4	11	36.3636	0.4	37.8	intergenic
NODE_19453_length_1536_cov_81.788414 mapping	684	SNV	1	A	C	Heterozygous	4	11	36.3636	0.4	34.6	intergenic
NODE_19453_length_1536_cov_81.788414 mapping	685	SNV	1	G	C	Heterozygous	7	11	63.6364	0.428571	39.2857	intergenic
NODE_19453_length_1536_cov_81.788414 mapping	692	SNV	1	G	A	Homozygous	10	11	90.9091	0.5	39.3	intergenic
NODE_19468_length_1070_cov_68.765419 mapping	428	SNV	1	C	T	Homozygous	5	11	45.4545	0.2	36.8	intergenic
NODE_19468_length_1070_cov_68.765419 mapping	459	SNV	1	A	G	Homozygous	4	10	40	0.25	38.5	intergenic
NODE_19468_length_1070_cov_68.765419 mapping	612	SNV	1	A	T	Homozygous	10	10	100	0.3	38.7	intergenic
NODE_19468_length_1070_cov_68.765419 mapping	630	SNV	1	T	C	Heterozygous	9	15	60	0.111111	35.8889	intergenic
NODE_19468_length_1070_cov_68.765419 mapping	647	SNV	1	G	A	Homozygous	16	16	100	0.25	39	intergenic
NODE_19468_length_1070_cov_68.765419 mapping	651	MNV	2	GG	AA	Heterozygous	4	18	22.2222	0.25	40	intergenic
NODE_19468_length_1070_cov_68.765419 mapping	652	SNV	1	G	A	Heterozygous	14	18	77.7778	0.285714	36.3929	intergenic
NODE_19468_length_1070_cov_68.765419 mapping	665	SNV	1	A	G	Heterozygous	10	19	52.6316	0.4	38.6	intergenic
NODE_19468_length_1070_cov_68.765419 mapping	667	SNV	1	A	G	Heterozygous	10	19	52.6316	0.4	39.1	intergenic
NODE_19468_length_1070_cov_68.765419 mapping	667	SNV	1	A	C	Heterozygous	9	19	47.3684	0.111111	38.7778	intergenic
NODE_19468_length_1070_cov_68.765419 mapping	675	SNV	1	C	T	Heterozygous	9	20	45	0.444444	37.3333	intergenic
NODE_19468_length_1070_cov_68.765419 mapping	684	SNV	1	T	A	Homozygous	17	17	100	0.294118	37.8235	intergenic
NODE_19468_length_1070_cov_68.765419 mapping	726	SNV	1	G	A	Heterozygous	4	18	22.2222	0.25	40.75	intergenic
NODE_19468_length_1070_cov_68.765419 mapping	746	SNV	1	C	G	Heterozygous	6	18	33.3333	0.333333	38	intergenic
NODE_19468_length_1070_cov_68.765419 mapping	760	MNV	2	AA	TG	Heterozygous	5	12	41.6667	0.2	40.8	intergenic
NODE_19468_length_1070_cov_68.765419 mapping	761	SNV	1	A	G	Heterozygous	7	12	58.3333	0.285714	35.7857	intergenic
NODE_19468_length_1070_cov_68.765419 mapping	769	MNV	2	AA	TG	Homozygous	10	10	100	0.4	40.1	intergenic
NODE_19468_length_1070_cov_68.765419 mapping	801	SNV	1	G	A	Homozygous	10	10	100	0.1	39.8	intergenic
NODE_19468_length_1070_cov_68.765419 mapping	811	SNV	1	C	A	Homozygous	14	14	100	0.214286	39.2857	intergenic
NODE_19468_length_1070_cov_68.765419 mapping	831	Deletion	1	C	-	Heterozygous	9	16	56.25	0.333333	38.4444	intergenic
NODE_19468_length_1070_cov_68.765419 mapping	839	SNV	1	G	A	Heterozygous	12	19	63.1579	0.416667	38.25	intergenic
NODE_19468_length_1070_cov_68.765419 mapping	849	SNV	1	T	C	Heterozygous	11	16	68.75	0.363636	39.2727	intergenic
NODE_19468_length_1070_cov_68.765419 mapping	852	SNV	1	C	T	Homozygous	16	16	100	0.375	38	intergenic
NODE_19468_length_1070_cov_68.765419 mapping	856	MNV	2	GC	AT	Homozygous	16	16	100	0.375	36.1562	intergenic
NODE_19468_length_1070_cov_68.765419 mapping	866	SNV	1	A	C	Heterozygous	5	16	31.25	0.4	34	intergenic
NODE_19468_length_1070_cov_68.765419 mapping	866	MNV	3	ATA	CCG	Heterozygous	6	16	37.5	0.5	37.875	intergenic
NODE_19468_length_1070_cov_68.765419 mapping	866	MNV	4	ATAC	CCGT	Heterozygous	5	16	31.25	0.2	36.3	intergenic
NODE_19468_length_1070_cov_68.765419 mapping	872	SNV	1	G	C	Heterozygous	9	16	56.25	0.333333	34.5556	intergenic
NODE_19468_length_1070_cov_68.765419 mapping	901	SNV	1	G	A	Heterozygous	3	13	23.0769	0.333333	39.3333	intergenic
NODE_19468_length_1070_cov_68.765419 mapping	903	SNV	1	C	T	Homozygous	13	13	100	0.153846	37.7692	intergenic
NODE_19468_length_1070_cov_68.765419 mapping	910	SNV	1	A	G	Heterozygous	3	13	23.0769	0.333333	39.3333	intergenic
NODE_19468_length_1070_cov_68.765419 mapping	922	Insertion	1	-	G	Homozygous	12	12	100	0.0833333	39.1667	intergenic
NODE_19468_length_1070_cov_68.765419 mapping	930	SNV	1	T	C	Homozygous	3	11	27.2727	0.333333	39.6667	intergenic
NODE_19468_length_1070_cov_68.765419 mapping	932	SNV	1	A	G	Homozygous	3	11	27.2727	0.333333	39.6667	intergenic
NODE_19468_length_1070_cov_68.765419 mapping	938	SNV	1	A	G	Homozygous	12	12	100	0.0833333	38.4167	intergenic
NODE_19468_length_1070_cov_68.765419 mapping	951	SNV	1	T	A	Homozygous	5	12	41.6667	0.2	36.4	intergenic
NODE_19468_length_1070_cov_68.765419 mapping	959	SNV	1	A	C	Homozygous	4	15	26.6667	0.25	30.75	intergenic
NODE_19644_length_4465_cov_53.169094 mapping	217	SNV	1	C	A	Homozygous	10	10	100	0.4	37.9	intron
NODE_19644_length_4465_cov_53.169094 mapping	1280	SNV	1	G	T	Homozygous	10	10	100	0.3	35.1	exon
NODE_19644_length_4465_cov_53.169094 mapping	1303	Insertion	2	-	CC	Heterozygous	5	10	50	0.4	36.1	exon
NODE_19824_length_3975_cov_53.816856 mapping	933	SNV	1	T	G	Homozygous	10	10	100	0.3	37.5	exon
NODE_19824_length_3975_cov_53.816856 mapping	3300	MNV	2	GG	TC	Homozygous	11	11	100	0.272727	38.7727	intergenic
NODE_19824_length_3975_cov_53.816856 mapping	3383	SNV	1	T	G	Homozygous	10	10	100	0.5	37.7	intergenic
NODE_19824_length_3975_cov_53.816856 mapping	3502	SNV	1	T	A	Homozygous	11	11	100	0.0833333	37	intergenic
NODE_19824_length_3975_cov_53.816856 mapping	3506	SNV	1	T	C	Homozygous	11	11	100	0.0833333	36.75	intergenic
NODE_19824_length_3975_cov_53.816856 mapping	3515	SNV	1	A	G	Homozygous	10	10	100	0.0909091	37.7273	intergenic
NODE_19893_length_12795_cov_35.269245 mapping	6192	SNV	1	G	C	Homozygous	10	10	100	0.1	37.5	intergenic
NODE_19982_length_7439_cov_53.558006 mapping	6255	SNV	1	G	A	Homozygous	10	10	100	0.3	37.5	intergenic
NODE_19982_length_7439_cov_53.558006 mapping	6305	SNV	1	A	G	Homozygous	11	11	100	0.363636	36	intergenic
NODE_19982_length_7439_cov_53.558006 mapping	6309	SNV	1	G	C	Homozygous	11	11	100	0.363636	37.2727	intergenic
NODE_20114_length_5473_cov_47.624153 mapping	3335	Insertion	1	-	T	Homozygous	10	10	100	0.1	34.2	intergenic
NODE_20114_length_5473_cov_47.624153 mapping	3752	SNV	1	C	G	Homozygous	10	10	100	0.3	38	intergenic
NODE_20114_length_5473_cov_47.624153 mapping	5010	SNV	1	C	T	Homozygous	10	10	100	0.4	37.5	intergenic
NODE_20114_length_5473_cov_47.624153 mapping	5017	SNV	1	G	A	Homozygous	10	10	100	0.4	37.9	intergenic
NODE_20114_length_5473_cov_47.624153 mapping	5023	SNV	1	A	T	Homozygous	10	10	100	0.4	36.1	intergenic
NODE_20140_length_1876_cov_57.159382 mapping	1035	SNV	1	A	G	Homozygous	10	10	100	0.1	38.8	intergenic
NODE_20140_length_1876_cov_57.159382 mapping	1039	Deletion	1	A	-	Homozygous	9	10	90	0.111111	38.1111	intergenic
NODE_20140_length_1876_cov_57.159382 mapping	1170	SNV	1	T	A	Homozygous	10	10	100	0.1	40	intergenic
NODE_20140_length_1876_cov_57.159382 mapping	1450	SNV	1	T	C	Homozygous	11	11	100	0.454545	37.2727	intergenic
NODE_20140_length_1876_cov_57.159382 mapping	1483	MNV	2	AT	TC	Homozygous	11	11	100	0.454545	36.4545	intergenic
NODE_20140_length_1876_cov_57.159382 mapping	1491	SNV	1	A	C	Heterozygous	7	13	53.8462	0.428571	37.8571	intergenic
NODE_20140_length_1876_cov_57.159382 mapping	1515	SNV	1	T	A	Homozygous	17	17	100	0.352941	38.7059	intergenic
NODE_20140_length_1876_cov_57.159382 mapping	1522	SNV	1	T	A	Homozygous	17	17	100	0.294118	39	intergenic
NODE_20140_length_1876_cov_57.159382 mapping	1525	SNV	1	C	G	Homozygous	17	17	100	0.294118	38.8235	intergenic
NODE_20140_length_1876_cov_57.159382 mapping	1536	SNV	1	A	C	Homozygous	15	15	100	0.266667	38.7333	intergenic
NODE_20140_length_1876_cov_57.159382 mapping	1568	SNV	1	A	G	Homozygous	12	12	100	0.25	33.3333	intergenic
NODE_20140_length_1876_cov_57.159382 mapping	1581	SNV	1	T	C	Homozygous	13	13	100	0.461538	34.7692	intergenic
NODE_20140_length_1876_cov_57.159382 mapping	1593	SNV	1	T	G	Homozygous	11	11	100	0.363636	36.0909	intergenic
NODE_20140_length_1876_cov_57.159382 mapping	1678	Deletion	1	G	-	Heterozygous	5	10	50	0.4	38.4	intergenic
NODE_20140_length_1876_cov_57.159382 mapping	1733	SNV	1	A	G	Homozygous	10	10	100	0.1	39.2	intergenic
NODE_8573_length_88841_cov_13.090465 mapping	39540	SNV	1	T	C	Homozygous	10	10	100	0.4	37.5	intron
NODE_8573_length_88841_cov_13.090465 mapping	39550	SNV	1	T	C	Homozygous	11	11	100	0.363636	37	intron
NODE_20200_length_1070_cov_51.220562 mapping	181	MNV	2	CG	AA	Homozygous	12	12	100	0.25	38.3333	intergenic
NODE_20200_length_1070_cov_51.220562 mapping	208	Deletion	1	A	-	Homozygous	17	17	100	0.411765	35.6471	intergenic
NODE_20200_length_1070_cov_51.220562 mapping	275	SNV	1	C	T	Homozygous	35	35	100	0.457143	39.2857	intergenic
NODE_20200_length_1070_cov_51.220562 mapping	285	SNV	1	C	T	Homozygous	33	33	100	0.441176	39.0882	intergenic
NODE_20200_length_1070_cov_51.220562 mapping	294	SNV	1	T	A	Homozygous	34	34	100	0.457143	38.6571	intergenic
NODE_20200_length_1070_cov_51.220562 mapping	328	SNV	1	G	T	Homozygous	30	30	100	0.4	39.0333	intergenic
NODE_20200_length_1070_cov_51.220562 mapping	403	SNV	1	T	G	Homozygous	33	33	100	0.393939	37.4848	intergenic
NODE_20200_length_1070_cov_51.220562 mapping	408	SNV	1	T	A	Homozygous	31	31	100	0.451613	37.9032	intergenic
NODE_20200_length_1070_cov_51.220562 mapping	411	SNV	1	C	T	Homozygous	31	31	100	0.451613	37.2581	intergenic
NODE_20200_length_1070_cov_51.220562 mapping	417	Deletion	2	AA	-	Homozygous	29	29	100	0.482759	37.2456	intergenic
NODE_20200_length_1070_cov_51.220562 mapping	422	SNV	1	A	T	Homozygous	32	32	100	0.4375	38.2812	intergenic
NODE_20200_length_1070_cov_51.220562 mapping	451	SNV	1	T	G	Homozygous	27	27	100	0.481481	36.2222	intergenic
NODE_20200_length_1070_cov_51.220562 mapping	488	Replacement	2	C	TA	Homozygous	25	25	100	0.44	38.72	intergenic
NODE_20200_length_1070_cov_51.220562 mapping	495	SNV	1	C	G	Heterozygous	21	28	75	0.380952	39.4286	intergenic
NODE_20200_length_1070_cov_51.220562 mapping	513	SNV	1	A	G	Heterozygous	22	30	73.3333	0.454545	37.9091	intergenic
NODE_20200_length_1070_cov_51.220562 mapping	535	SNV	1	A	G	Homozygous	28	28	100	0.392857	38.0357	intergenic
NODE_20200_length_1070_cov_51.220562 mapping	580	SNV	1	T	C	Homozygous	36	41	87.8049	0.378378	35.8649	intergenic
NODE_20200_length_1070_cov_51.220562 mapping	584	SNV	1	T	A	Homozygous	38	43	88.3721	0.368421	37.2368	intergenic
NODE_20200_length_1070_cov_51.220562 mapping	606	SNV	1	G	T	Homozygous	38	38	100	0.473684	38.5	intergenic
NODE_20200_length_1070_cov_51.220562 mapping	635	SNV	1	C	T	Homozygous	41	41	100	0.488372	35.3023	intergenic
NODE_20200_length_1070_cov_51.220562 mapping	664	SNV	1	G	A	Homozygous	30	32	93.75	0.433333	38.8	intergenic
NODE_20200_length_1070_cov_51.220562 mapping	682	SNV	1	C	T	Homozygous	29	29	100	0.37931	38.4483	intergenic
NODE_20200_length_1070_cov_51.220562 mapping	694	SNV	1	A	T	Homozygous	30	34	88.2353	0.366667	37.4667	intergenic
NODE_20200_length_1070_cov_51.220562 mapping	722	SNV	1	T	C	Homozygous	27	31	87.0968	0.259259	36.4444	intergenic
NODE_20200_length_1070_cov_51.220562 mapping	739	SNV	1	A	G	Homozygous	30	30	100	0.2	35.9	intergenic
NODE_20200_length_1070_cov_51.220562 mapping	786	SNV	1	T	C	Homozygous	28	28	100	0.25	36.7143	intergenic
NODE_20200_length_1070_cov_51.220562 mapping	803	Deletion	1	A	-	Homozygous	16	23	69.5652	0.375	38.625	intergenic
NODE_20200_length_1070_cov_51.220562 mapping	814	MNV	2	CC	GT	Homozygous	16	16	100	0.3125	37.9375	intergenic
NODE_20200_length_1070_cov_51.220562 mapping	819	SNV	1	C	T	Homozygous	16	16	100	0.3125	39.5	intergenic
NODE_20200_length_1070_cov_51.220562 mapping	852	SNV	1	T	C	Homozygous	14	14	100	0.285714	36.7857	intergenic
NODE_20200_length_1070_cov_51.220562 mapping	857	Deletion	1	A	-	Homozygous	11	13	84.6154	0.181818	34	intergenic
NODE_20290_length_4390_cov_70.531433 mapping	1352	SNV	1	T	G	Homozygous	11	11	100	0.0833333	40.25	exon
NODE_20290_length_4390_cov_70.531433 mapping	1416	SNV	1	A	C	Homozygous	11	11	100	0.5	37.9167	exon
NODE_20290_length_4390_cov_70.531433 mapping	1421	SNV	1	A	G	Homozygous	12	12	100	0.416667	37	exon
NODE_20290_length_4390_cov_70.531433 mapping	1452	SNV	1	T	C	Homozygous	10	10	100	0.4	37.4	exon
NODE_20290_length_4390_cov_70.531433 mapping	1572	SNV	1	T	C	Homozygous	11	11	100	0.272727	34.4545	exon
NODE_20290_length_4390_cov_70.531433 mapping	1755	SNV	1	C	T	Homozygous	10	10	100	0.3	38.5	exon
NODE_20290_length_4390_cov_70.531433 mapping	1783	SNV	1	G	T	Homozygous	15	15	100	0.333333	39.1333	exon
NODE_20290_length_4390_cov_70.531433 mapping	1807	SNV	1	G	A	Homozygous	12	12	100	0.333333	37.9167	exon
NODE_20290_length_4390_cov_70.531433 mapping	1813	SNV	1	G	A	Homozygous	12	12	100	0.333333	38.9167	exon
NODE_20290_length_4390_cov_70.531433 mapping	1824	SNV	1	G	T	Homozygous	13	13	100	0.307692	37.2308	exon
NODE_20290_length_4390_cov_70.531433 mapping	1836	SNV	1	G	A	Homozygous	12	12	100	0.333333	38	exon
NODE_20290_length_4390_cov_70.531433 mapping	1945	SNV	1	T	C	Homozygous	12	12	100	0.166667	35.8333	intron
NODE_20290_length_4390_cov_70.531433 mapping	1973	SNV	1	T	A	Homozygous	12	12	100	0.166667	35.5	intron
NODE_20290_length_4390_cov_70.531433 mapping	3033	SNV	1	A	G	Heterozygous	4	10	40	0.25	40.5	intron
NODE_20290_length_4390_cov_70.531433 mapping	3039	SNV	1	A	G	Homozygous	10	10	100	0.2	36.2	intron
NODE_20290_length_4390_cov_70.531433 mapping	3090	SNV	1	C	A	Homozygous	10	10	100	0.4	37.8	intron
NODE_20290_length_4390_cov_70.531433 mapping	3097	SNV	1	T	C	Homozygous	10	10	100	0.4	35.8	intron
NODE_20290_length_4390_cov_70.531433 mapping	3131	SNV	1	A	C	Homozygous	10	10	100	0.4	37.6	intron
NODE_20290_length_4390_cov_70.531433 mapping	3185	SNV	1	T	A	Homozygous	10	10	100	0.4	38.4	intron
NODE_20290_length_4390_cov_70.531433 mapping	3260	SNV	1	A	T	Homozygous	11	11	100	0.363636	38.5455	intron
NODE_20290_length_4390_cov_70.531433 mapping	3266	SNV	1	A	G	Homozygous	10	10	100	0.4	38.8	intron
NODE_20290_length_4390_cov_70.531433 mapping	3284	SNV	1	C	T	Homozygous	10	10	100	0.5	39.6	intron
NODE_20290_length_4390_cov_70.531433 mapping	3330	SNV	1	C	T	Homozygous	11	11	100	0.454545	37.0909	intron
NODE_20290_length_4390_cov_70.531433 mapping	3889	SNV	1	C	T	Homozygous	10	10	100	0.3	38.6	intron
NODE_20290_length_4390_cov_70.531433 mapping	3937	SNV	1	T	G	Homozygous	11	11	100	0.181818	36.9091	intron
NODE_20290_length_4390_cov_70.531433 mapping	4000	SNV	1	A	T	Homozygous	10	10	100	0.5	38.2	intron
NODE_20290_length_4390_cov_70.531433 mapping	4064	Deletion	1	T	-	Homozygous	4	10	40	0.25	35.75	intron
NODE_20290_length_4390_cov_70.531433 mapping	4084	SNV	1	C	T	Homozygous	12	12	100	0.25	35.75	intron
NODE_20268_length_8682_cov_53.123127 mapping	6295	SNV	1	G	T	Heterozygous	5	10	50	0.4	37.8	intergenic
NODE_20268_length_8682_cov_53.123127 mapping	6299	SNV	1	A	G	Homozygous	11	11	100	0.272727	37.5455	intergenic
NODE_20268_length_8682_cov_53.123127 mapping	6304	SNV	1	G	T	Homozygous	10	10	100	0.2	37.6	intergenic
NODE_20268_length_8682_cov_53.123127 mapping	6312	SNV	1	T	A	Heterozygous	5	10	50	0.2	35.8	intergenic
NODE_20393_length_4715_cov_62.783882 mapping	2813	SNV	1	A	G	Homozygous	10	10	100	0.2	38.8	intergenic
NODE_20393_length_4715_cov_62.783882 mapping	2816	SNV	1	A	T	Homozygous	10	10	100	0.2	36	intergenic
NODE_18356_length_25117_cov_13.901501 mapping	12821	SNV	1	A	T	Homozygous	12	12	100	0.416667	36.5833	intergenic
NODE_18356_length_25117_cov_13.901501 mapping	12825	Deletion	1	G	-	Homozygous	11	11	100	0.454545	36.0909	intergenic
NODE_18356_length_25117_cov_13.901501 mapping	12827	SNV	1	C	T	Homozygous	11	11	100	0.454545	37.0909	intergenic
NODE_18356_length_25117_cov_13.901501 mapping	12830	SNV	1	C	A	Homozygous	11	11	100	0.454545	34.6364	intergenic
NODE_18356_length_25117_cov_13.901501 mapping	12840	SNV	1	T	C	Homozygous	11	11	100	0.363636	36.0909	intergenic
NODE_18356_length_25117_cov_13.901501 mapping	13154	MNV	2	AA	GG	Heterozygous	5	11	45.4545	0.4	38.2	intergenic
NODE_18356_length_25117_cov_13.901501 mapping	13155	SNV	1	A	G	Heterozygous	6	11	54.5455	0.333333	40.0833	intergenic
NODE_18356_length_25117_cov_13.901501 mapping	13174	MNV	2	AC	GA	Homozygous	13	13	100	0.230769	38.5769	intergenic
NODE_18356_length_25117_cov_13.901501 mapping	13189	SNV	1	C	A	Homozygous	13	13	100	0.470588	39.1765	intergenic
NODE_18356_length_25117_cov_13.901501 mapping	13204	SNV	1	C	A	Homozygous	10	11	90.9091	0.384615	39.7692	intergenic
NODE_18356_length_25117_cov_13.901501 mapping	13210	SNV	1	C	G	Homozygous	11	11	100	0.466667	38.4667	intergenic
NODE_18356_length_25117_cov_13.901501 mapping	13214	SNV	1	G	T	Homozygous	10	11	90.9091	0.428571	38.1429	intergenic
NODE_18356_length_25117_cov_13.901501 mapping	13225	Insertion	1	-	A	Homozygous	6	10	60	0.428571	37.4286	intergenic
NODE_20591_length_5583_cov_69.622429 mapping	375	SNV	1	T	G	Heterozygous	4	10	40	0.25	40.75	intergenic
NODE_20591_length_5583_cov_69.622429 mapping	1001	SNV	1	C	T	Homozygous	10	10	100	0.4	38.4	intergenic
NODE_20591_length_5583_cov_69.622429 mapping	1049	SNV	1	T	G	Homozygous	13	13	100	0.461538	33.6154	intergenic
NODE_20591_length_5583_cov_69.622429 mapping	1088	Insertion	1	-	T	Homozygous	14	14	100	0.5	38.4286	intergenic
NODE_20591_length_5583_cov_69.622429 mapping	1100	SNV	1	A	G	Homozygous	10	10	100	0.4	37.5	intergenic
NODE_20591_length_5583_cov_69.622429 mapping	1225	SNV	1	G	A	Homozygous	12	12	100	0.25	38.9167	intergenic
NODE_20591_length_5583_cov_69.622429 mapping	1234	SNV	1	A	G	Homozygous	12	12	100	0.25	38.8333	intergenic
NODE_20591_length_5583_cov_69.622429 mapping	1236	Insertion	1	-	A	Homozygous	12	12	100	0.25	37.6667	intergenic
NODE_20730_length_21996_cov_42.437805 mapping	11764	SNV	1	C	G	Homozygous	10	10	100	0.5	39.4	intergenic
NODE_20730_length_21996_cov_42.437805 mapping	11779	SNV	1	T	A	Homozygous	10	10	100	0.5	38.1	intergenic
NODE_20730_length_21996_cov_42.437805 mapping	11791	SNV	1	G	A	Homozygous	12	12	100	0.416667	39.75	intergenic
NODE_20730_length_21996_cov_42.437805 mapping	11809	SNV	1	G	A	Homozygous	12	12	100	0.333333	38.9167	intergenic
NODE_20730_length_21996_cov_42.437805 mapping	11918	SNV	1	C	T	Homozygous	10	10	100	0.4	39.3	intergenic
NODE_20730_length_21996_cov_42.437805 mapping	11923	SNV	1	C	T	Homozygous	10	10	100	0.4	38.2	intergenic
NODE_20730_length_21996_cov_42.437805 mapping	11957	SNV	1	G	A	Homozygous	10	10	100	0.3	38	intergenic
NODE_20730_length_21996_cov_42.437805 mapping	14883	SNV	1	C	A	Homozygous	10	10	100	0.3	38.5	intergenic
NODE_20730_length_21996_cov_42.437805 mapping	14891	SNV	1	T	A	Homozygous	11	11	100	0.333333	38.5833	intergenic
NODE_20730_length_21996_cov_42.437805 mapping	14895	SNV	1	T	C	Homozygous	11	11	100	0.333333	37.25	intergenic
NODE_20730_length_21996_cov_42.437805 mapping	15003	MNV	2	TT	GC	Homozygous	10	10	100	0.4	36.85	intergenic
NODE_20730_length_21996_cov_42.437805 mapping	15078	SNV	1	T	G	Homozygous	12	12	100	0.416667	38.3333	intergenic
NODE_20730_length_21996_cov_42.437805 mapping	15134	Deletion	1	T	-	Homozygous	10	11	90.9091	0.3	33.5	intergenic
NODE_20730_length_21996_cov_42.437805 mapping	15150	SNV	1	C	T	Homozygous	11	11	100	0.272727	37.0909	intergenic
NODE_20730_length_21996_cov_42.437805 mapping	15157	SNV	1	A	G	Homozygous	10	10	100	0.2	38.7	intergenic
NODE_20952_length_3182_cov_53.294155 mapping	451	SNV	1	C	T	Homozygous	10	10	100	0.5	34.3	exon
NODE_20952_length_3182_cov_53.294155 mapping	467	SNV	1	A	T	Homozygous	12	12	100	0.5	35.9167	exon
NODE_20952_length_3182_cov_53.294155 mapping	469	SNV	1	T	A	Homozygous	12	12	100	0.5	37.5	exon
NODE_20952_length_3182_cov_53.294155 mapping	474	SNV	1	T	C	Homozygous	10	11	90.9091	0.4	35.4	exon
NODE_20952_length_3182_cov_53.294155 mapping	502	SNV	1	G	A	Homozygous	12	12	100	0.333333	39.0833	exon
NODE_20952_length_3182_cov_53.294155 mapping	520	SNV	1	A	T	Homozygous	12	12	100	0.416667	38.8333	exon
NODE_20952_length_3182_cov_53.294155 mapping	523	SNV	1	C	T	Homozygous	12	12	100	0.416667	39.25	exon
NODE_17825_length_64978_cov_19.541214 mapping	45871	SNV	1	T	C	Homozygous	12	31	38.7097	0.333333	36.7333	intergenic
NODE_21067_length_12944_cov_39.638367 mapping	2726	SNV	1	A	T	Homozygous	10	10	100	0.1	38.2	intergenic
NODE_21067_length_12944_cov_39.638367 mapping	2733	SNV	1	G	A	Homozygous	10	10	100	0.1	38.4	intergenic
NODE_21067_length_12944_cov_39.638367 mapping	2867	SNV	1	A	C	Homozygous	10	10	100	0.2	37.2	intergenic
NODE_21067_length_12944_cov_39.638367 mapping	2879	SNV	1	C	T	Homozygous	12	12	100	0.166667	34	intergenic
NODE_21067_length_12944_cov_39.638367 mapping	2886	SNV	1	T	C	Homozygous	12	12	100	0.166667	38	intergenic
NODE_21067_length_12944_cov_39.638367 mapping	2892	SNV	1	G	A	Homozygous	11	11	100	0.181818	38.1818	intergenic
NODE_21067_length_12944_cov_39.638367 mapping	2907	SNV	1	T	C	Homozygous	10	10	100	0.1	37.6	intergenic
NODE_21067_length_12944_cov_39.638367 mapping	5288	SNV	1	G	C	Homozygous	10	10	100	0.1	39.9	intergenic
NODE_21067_length_12944_cov_39.638367 mapping	5308	SNV	1	G	T	Homozygous	11	11	100	0.0909091	38.4545	intergenic
NODE_21067_length_12944_cov_39.638367 mapping	5324	SNV	1	G	A	Homozygous	13	13	100	0.0769231	38.3846	intergenic
NODE_21067_length_12944_cov_39.638367 mapping	5328	MNV	2	CC	TT	Homozygous	11	11	100	0.0909091	38.6818	intergenic
NODE_21067_length_12944_cov_39.638367 mapping	5331	SNV	1	G	A	Homozygous	11	11	100	0.0909091	39.6364	intergenic
NODE_21067_length_12944_cov_39.638367 mapping	5335	SNV	1	A	G	Homozygous	12	12	100	0.0833333	35.1667	intergenic
NODE_21067_length_12944_cov_39.638367 mapping	5348	SNV	1	G	T	Homozygous	13	13	100	0.230769	38.6154	intergenic
NODE_21067_length_12944_cov_39.638367 mapping	5361	SNV	1	G	A	Homozygous	11	11	100	0.272727	39.2727	intergenic
NODE_21067_length_12944_cov_39.638367 mapping	5379	SNV	1	C	T	Homozygous	10	10	100	0.2	40.1	intergenic
NODE_21067_length_12944_cov_39.638367 mapping	5382	SNV	1	A	T	Homozygous	10	10	100	0.2	37.3	intergenic
NODE_21067_length_12944_cov_39.638367 mapping	5384	SNV	1	A	T	Heterozygous	6	10	60	0.166667	39.3333	intergenic
NODE_21067_length_12944_cov_39.638367 mapping	5400	SNV	1	T	A	Heterozygous	3	11	27.2727	0.333333	40.6667	intergenic
NODE_21067_length_12944_cov_39.638367 mapping	5404	SNV	1	C	A	Homozygous	11	11	100	0.272727	38.0909	intergenic
NODE_21067_length_12944_cov_39.638367 mapping	5422	MNV	2	CC	TA	Homozygous	11	11	100	0.454545	39.0455	intergenic
NODE_21067_length_12944_cov_39.638367 mapping	5438	SNV	1	A	T	Homozygous	10	10	100	0.5	39.3	intergenic
NODE_21067_length_12944_cov_39.638367 mapping	5479	Deletion	2	GT	-	Homozygous	12	12	100	0.25	35.5	intergenic
NODE_21067_length_12944_cov_39.638367 mapping	5484	SNV	1	G	C	Homozygous	13	13	100	0.230769	38	intergenic
NODE_21067_length_12944_cov_39.638367 mapping	5494	Deletion	2	AA	-	Homozygous	14	14	100	0.214286	38.4815	intergenic
NODE_21067_length_12944_cov_39.638367 mapping	5507	SNV	1	G	A	Homozygous	12	12	100	0.0833333	39	intergenic
NODE_21067_length_12944_cov_39.638367 mapping	5511	SNV	1	A	T	Homozygous	9	10	90	0.111111	39.2222	intergenic
NODE_21067_length_12944_cov_39.638367 mapping	5528	MNV	2	TG	GA	Homozygous	11	11	100	0.181818	39.5	intergenic
NODE_21067_length_12944_cov_39.638367 mapping	5549	SNV	1	G	C	Homozygous	11	11	100	0.181818	39.0909	intergenic
NODE_21067_length_12944_cov_39.638367 mapping	5554	SNV	1	G	A	Homozygous	11	11	100	0.181818	38.1818	intergenic
NODE_21072_length_4137_cov_58.349285 mapping	1589	SNV	1	G	T	Homozygous	11	11	100	0.454545	39.9091	intergenic
NODE_21072_length_4137_cov_58.349285 mapping	1600	SNV	1	T	C	Homozygous	11	11	100	0.454545	40.0909	intergenic
NODE_21072_length_4137_cov_58.349285 mapping	1604	SNV	1	A	G	Homozygous	11	11	100	0.454545	38.2727	intergenic
NODE_21072_length_4137_cov_58.349285 mapping	1621	SNV	1	T	C	Homozygous	10	10	100	0.4	39	intergenic
NODE_21208_length_5780_cov_57.193943 mapping	2838	SNV	1	T	A	Homozygous	10	10	100	0.1	38.6	intergenic
NODE_21208_length_5780_cov_57.193943 mapping	2842	SNV	1	A	T	Homozygous	10	10	100	0.1	37.2	intergenic
NODE_21208_length_5780_cov_57.193943 mapping	2988	SNV	1	C	A	Homozygous	10	10	100	0.2	38	intergenic
NODE_21428_length_1184_cov_3398.999268 mapping	368	SNV	1	A	C	Homozygous	231	231	100	0.441558	36.2424	exon
NODE_21428_length_1184_cov_3398.999268 mapping	395	SNV	1	C	A	Homozygous	128	129	99.2248	0.40625	35.9844	exon
NODE_21428_length_1184_cov_3398.999268 mapping	933	Replacement	2	CC	A	Heterozygous	38	99	38.3838	0.263158	38.9467	exon
NODE_21428_length_1184_cov_3398.999268 mapping	937	Deletion	1	T	-	Heterozygous	40	115	34.7826	0.275	37.9	exon
NODE_21428_length_1184_cov_3398.999268 mapping	970	SNV	1	T	G	Homozygous	198	198	100	0.353535	37.1465	exon
NODE_21428_length_1184_cov_3398.999268 mapping	1141	SNV	1	C	A	Homozygous	125	163	76.6871	0.110236	38.4016	exon
NODE_21520_length_3672_cov_84.972771 mapping	459	SNV	1	A	C	Homozygous	11	11	100	0.454545	36.6364	intergenic
NODE_21520_length_3672_cov_84.972771 mapping	462	SNV	1	C	T	Homozygous	11	11	100	0.454545	36.4545	intergenic
NODE_3287_length_142918_cov_12.702221 mapping	7695	SNV	1	G	A	Homozygous	10	10	100	0.5	39.9	intron
NODE_3287_length_142918_cov_12.702221 mapping	7703	SNV	1	A	G	Heterozygous	3	10	30	0.333333	40	intron
NODE_3287_length_142918_cov_12.702221 mapping	7714	SNV	1	C	T	Homozygous	10	10	100	0.5	37.9	intron
NODE_3287_length_142918_cov_12.702221 mapping	7717	SNV	1	A	T	Homozygous	10	10	100	0.5	39.7	intron
NODE_3287_length_142918_cov_12.702221 mapping	28693	SNV	1	T	C	Homozygous	12	12	100	0.5	34.3333	intron
NODE_3287_length_142918_cov_12.702221 mapping	28702	SNV	1	T	C	Homozygous	9	12	75	0.4	37.5	intron
NODE_3287_length_142918_cov_12.702221 mapping	28706	SNV	1	T	C	Homozygous	12	12	100	0.461538	36.3077	intron
NODE_3287_length_142918_cov_12.702221 mapping	28708	SNV	1	G	T	Homozygous	12	12	100	0.461538	37.8462	intron
NODE_3287_length_142918_cov_12.702221 mapping	28713	SNV	1	A	G	Homozygous	10	10	100	0.454545	38.7273	intron
NODE_3287_length_142918_cov_12.702221 mapping	45077	SNV	1	G	C	Heterozygous	5	10	50	0.4	36.8	exon
NODE_3287_length_142918_cov_12.702221 mapping	45975	SNV	1	A	C	Heterozygous	4	11	36.3636	0.25	38	intron
NODE_3287_length_142918_cov_12.702221 mapping	45996	SNV	1	G	A	Homozygous	10	10	100	0.3	38.8	intron
NODE_3287_length_142918_cov_12.702221 mapping	46026	SNV	1	G	A	Homozygous	8	10	80	0.5	37.625	intron
NODE_3287_length_142918_cov_12.702221 mapping	46032	SNV	1	C	T	Heterozygous	4	10	40	0.25	35.25	intron
NODE_3287_length_142918_cov_12.702221 mapping	46043	SNV	1	G	A	Heterozygous	3	10	30	0.333333	35.6667	intron
NODE_3287_length_142918_cov_12.702221 mapping	46046	SNV	1	T	C	Heterozygous	5	11	45.4545	0.2	37.8	intron
NODE_3287_length_142918_cov_12.702221 mapping	46091	SNV	1	C	T	Heterozygous	6	10	60	0.333333	38.3333	intron
NODE_3287_length_142918_cov_12.702221 mapping	46091	MNV	2	CC	TT	Heterozygous	4	10	40	0.5	38.25	intron
NODE_3287_length_142918_cov_12.702221 mapping	46094	SNV	1	A	T	Homozygous	10	10	100	0.4	39.2	intron
NODE_3287_length_142918_cov_12.702221 mapping	46096	SNV	1	C	A	Heterozygous	3	11	27.2727	0.333333	36.3333	intron
NODE_3287_length_142918_cov_12.702221 mapping	46106	SNV	1	G	A	Heterozygous	3	13	23.0769	0.333333	39.3333	intron
NODE_3287_length_142918_cov_12.702221 mapping	46112	SNV	1	A	T	Heterozygous	4	14	28.5714	0.5	37.75	intron
NODE_3287_length_142918_cov_12.702221 mapping	46126	SNV	1	C	A	Heterozygous	8	17	47.0588	0.375	36.5	intron
NODE_3287_length_142918_cov_12.702221 mapping	46132	SNV	1	C	T	Heterozygous	4	17	23.5294	0.5	39.75	intron
NODE_3287_length_142918_cov_12.702221 mapping	46149	SNV	1	T	G	Heterozygous	4	17	23.5294	0.5	36.5	intron
NODE_3287_length_142918_cov_12.702221 mapping	46166	SNV	1	T	G	Homozygous	14	15	93.3333	0.214286	38.9286	intron
NODE_3287_length_142918_cov_12.702221 mapping	46177	SNV	1	C	T	Homozygous	12	13	92.3077	0.25	38.9167	intron
NODE_3287_length_142918_cov_12.702221 mapping	46184	SNV	1	A	G	Heterozygous	6	13	46.1538	0.333333	39.5	intron
NODE_3287_length_142918_cov_12.702221 mapping	46203	SNV	1	C	T	Homozygous	8	11	72.7273	0.125	37.375	intron
NODE_3287_length_142918_cov_12.702221 mapping	46245	SNV	1	C	T	Heterozygous	3	10	30	0.333333	31.3333	intron
NODE_3287_length_142918_cov_12.702221 mapping	46269	SNV	1	C	T	Heterozygous	6	10	60	0.333333	36.5	intron
NODE_3287_length_142918_cov_12.702221 mapping	46277	MNV	2	AA	GG	Heterozygous	5	12	41.6667	0.4	37.3	intron
NODE_3287_length_142918_cov_12.702221 mapping	46278	SNV	1	A	G	Heterozygous	7	12	58.3333	0.428571	33.6429	intron
NODE_3287_length_142918_cov_12.702221 mapping	46282	SNV	1	A	C	Heterozygous	10	12	83.3333	0.5	34.8	intron
NODE_3287_length_142918_cov_12.702221 mapping	46282	SNV	1	A	T	Heterozygous	2	12	16.6667	0.5	37	intron
NODE_3287_length_142918_cov_12.702221 mapping	46301	SNV	1	C	A	Heterozygous	3	12	25	0.333333	40.3333	intron
NODE_3287_length_142918_cov_12.702221 mapping	46308	Deletion	1	A	-	Heterozygous	7	13	53.8462	0.285714	37.5714	intron
NODE_3287_length_142918_cov_12.702221 mapping	46315	SNV	1	C	T	Heterozygous	3	11	27.2727	0.333333	38.6667	intron
NODE_3287_length_142918_cov_12.702221 mapping	46317	SNV	1	T	A	Heterozygous	3	11	27.2727	0.333333	38.3333	intron
NODE_3287_length_142918_cov_12.702221 mapping	46325	Deletion	1	A	-	Homozygous	9	10	90	0.222222	38.6667	intron
NODE_3287_length_142918_cov_12.702221 mapping	46347	SNV	1	A	T	Heterozygous	3	14	21.4286	0.333333	38	intron
NODE_3287_length_142918_cov_12.702221 mapping	46354	SNV	1	T	C	Heterozygous	3	15	20	0.333333	40.3333	intron
NODE_3287_length_142918_cov_12.702221 mapping	46366	SNV	1	T	C	Homozygous	14	14	100	0.357143	36.4286	intron
NODE_3287_length_142918_cov_12.702221 mapping	46370	SNV	1	T	A	Heterozygous	5	13	38.4615	0.4	37.6	intron
NODE_3287_length_142918_cov_12.702221 mapping	46378	SNV	1	T	C	Homozygous	11	12	91.6667	0.454545	39.4545	intron
NODE_3287_length_142918_cov_12.702221 mapping	46382	SNV	1	C	T	Heterozygous	3	13	23.0769	0.333333	41	intron
NODE_3287_length_142918_cov_12.702221 mapping	46386	SNV	1	T	C	Homozygous	13	13	100	0.461538	37.3846	intron
NODE_3287_length_142918_cov_12.702221 mapping	46398	SNV	1	G	A	Heterozygous	3	14	21.4286	0.333333	38.3333	intron
NODE_3287_length_142918_cov_12.702221 mapping	46421	SNV	1	A	G	Homozygous	17	17	100	0.473684	36.7895	intron
NODE_3287_length_142918_cov_12.702221 mapping	46431	SNV	1	T	C	Heterozygous	12	16	75	0.428571	38.6429	intron
NODE_3287_length_142918_cov_12.702221 mapping	46437	SNV	1	T	C	Heterozygous	5	14	35.7143	0.428571	39.5714	intron
NODE_3287_length_142918_cov_12.702221 mapping	46451	SNV	1	T	A	Homozygous	12	13	92.3077	0.5	38	intron
NODE_3287_length_142918_cov_12.702221 mapping	46456	SNV	1	T	A	Heterozygous	3	13	23.0769	0.333333	39.6667	intron
NODE_3287_length_142918_cov_12.702221 mapping	46477	SNV	1	A	C	Heterozygous	4	16	25	0.5	39.3333	intron
NODE_3287_length_142918_cov_12.702221 mapping	46480	SNV	1	C	T	Heterozygous	4	16	25	0.5	39	intron
NODE_3287_length_142918_cov_12.702221 mapping	46482	SNV	1	A	G	Homozygous	14	15	93.3333	0.375	37.8125	intron
NODE_3287_length_142918_cov_12.702221 mapping	46505	SNV	1	C	T	Heterozygous	6	10	60	0.5	39.75	intron
NODE_3287_length_142918_cov_12.702221 mapping	46505	Replacement	2	C	AT	Heterozygous	4	10	40	0.25	35.5	intron
NODE_3287_length_142918_cov_12.702221 mapping	46508	SNV	1	T	C	Homozygous	7	11	63.6364	0.142857	37.5714	intron
NODE_3287_length_142918_cov_12.702221 mapping	59248	SNV	1	T	A	Heterozygous	3	10	30	0.333333	37	intron
[truncated: 343,766+ more rows]
