# Supplementary material for: The genome and transcriptome of Phalaenopsis yield insights into floral organ development and flowering regulation
Source: PeerJ. 2016 May 12;4:e2017. doi: 10.7717/peerj.2017 (PMC4868593; doi:10.7717/peerj.2017)
Supplement: Supplemental Information 5 [file peerj-04-2017-s005.xlsx]

## Sheet: 工作表1
Dataset S16-2: Distribution of SNPs identified between the Phalaenopsis accessions 'KHM190' and 'B8802'
Mapping	Reference Position	Type	Length	Reference	Allele	Zygosity	Count	Coverage	Frequency	Forward/reverse balance	Average quality	Type
NODE_4763856_length_74288_cov_17.330053 mapping	17494	SNV	1	C	A	Heterozygous	25	40	62.5	0.2	37.92	exon
NODE_4763856_length_74288_cov_17.330053 mapping	17500	SNV	1	A	T	Homozygous	39	41	95.122	0.179487	38.0256	exon
NODE_4763856_length_74288_cov_17.330053 mapping	17510	MNV	2	CA	AG	Homozygous	40	40	100	0.2	37.55	exon
NODE_4763856_length_74288_cov_17.330053 mapping	17513	SNV	1	A	G	Homozygous	39	40	97.5	0.205128	38.1026	exon
NODE_4763856_length_74288_cov_17.330053 mapping	17519	SNV	1	G	A	Heterozygous	12	43	27.907	0.0833333	34.8333	exon
NODE_4763856_length_74288_cov_17.330053 mapping	17549	SNV	1	A	G	Homozygous	40	43	93.0233	0.2	35.15	exon
NODE_4763856_length_74288_cov_17.330053 mapping	17557	SNV	1	A	G	Heterozygous	11	41	26.8293	0.0909091	33.7273	exon
NODE_4763856_length_74288_cov_17.330053 mapping	17565	SNV	1	A	C	Homozygous	35	36	97.2222	0.171429	35.4571	exon
NODE_4763856_length_74288_cov_17.330053 mapping	17570	SNV	1	A	G	Heterozygous	20	33	60.6061	0.2	35.5	exon
NODE_4763856_length_74288_cov_17.330053 mapping	17577	SNV	1	T	G	Homozygous	34	34	100	0.205882	36.9706	exon
NODE_4763856_length_74288_cov_17.330053 mapping	17583	SNV	1	C	T	Heterozygous	12	31	38.7097	0.416667	36.9167	exon
NODE_4763856_length_74288_cov_17.330053 mapping	17585	SNV	1	C	A	Heterozygous	12	31	38.7097	0.416667	35.6957	exon
NODE_4763856_length_74288_cov_17.330053 mapping	17585	SNV	1	C	G	Heterozygous	6	31	19.3548	0	39.9	exon
NODE_4763856_length_74288_cov_17.330053 mapping	17585	MNV	2	CG	GA	Heterozygous	13	31	41.9355	0.153846	38.8077	exon
NODE_4763856_length_74288_cov_17.330053 mapping	17591	SNV	1	A	G	Homozygous	38	38	100	0.368421	36.8947	exon
NODE_4763856_length_74288_cov_17.330053 mapping	17594	SNV	1	C	T	Heterozygous	20	39	51.2821	0.4	33.8	exon
NODE_4763856_length_74288_cov_17.330053 mapping	17623	SNV	1	T	G	Heterozygous	24	74	32.4324	0.25	36.125	exon
NODE_4763856_length_74288_cov_17.330053 mapping	17647	MNV	2	CT	TG	Heterozygous	26	84	30.9524	0.346154	37.4231	exon
NODE_4763856_length_74288_cov_17.330053 mapping	17648	SNV	1	T	G	Heterozygous	58	84	69.0476	0.362069	38.1652	exon
NODE_4763856_length_74288_cov_17.330053 mapping	17686	SNV	1	G	A	Heterozygous	36	123	29.2683	0.416667	36.9444	exon
NODE_4763856_length_74288_cov_17.330053 mapping	17701	SNV	1	T	G	Heterozygous	67	137	48.9051	0.298507	37.7463	exon
NODE_4763856_length_74288_cov_17.330053 mapping	17717	MNV	2	AA	GT	Homozygous	134	134	100	0.253731	37.944	exon
NODE_4763856_length_74288_cov_17.330053 mapping	17729	SNV	1	T	C	Homozygous	140	151	92.7152	0.2	38.2643	exon
NODE_4763856_length_74288_cov_17.330053 mapping	17735	SNV	1	C	T	Heterozygous	66	159	41.5094	0.212121	39.1061	exon
NODE_4763856_length_74288_cov_17.330053 mapping	17741	SNV	1	T	C	Heterozygous	39	157	24.8408	0.307692	37.8205	exon
NODE_4763856_length_74288_cov_17.330053 mapping	17812	SNV	1	T	G	Homozygous	114	144	79.1667	0.33913	36.4087	exon
NODE_4763856_length_74288_cov_17.330053 mapping	17829	SNV	1	G	A	Heterozygous	46	152	30.2632	0.456522	32.3043	exon
NODE_4763856_length_74288_cov_17.330053 mapping	17837	SNV	1	C	T	Heterozygous	41	151	27.1523	0.341463	38.5854	exon
NODE_4763856_length_74288_cov_17.330053 mapping	17846	SNV	1	T	C	Homozygous	156	159	98.1132	0.43038	36.2025	exon
NODE_4763856_length_74288_cov_17.330053 mapping	17856	SNV	1	C	T	Heterozygous	42	171	24.5614	0.333333	38	exon
NODE_4763856_length_74288_cov_17.330053 mapping	17877	SNV	1	T	A	Heterozygous	48	161	29.8137	0.145833	35.25	exon
NODE_4763856_length_74288_cov_17.330053 mapping	17890	SNV	1	T	C	Homozygous	121	145	83.4483	0.172131	38.0246	exon
NODE_4763856_length_74288_cov_17.330053 mapping	17901	Insertion	1	-	A	Heterozygous	43	134	32.0896	0.162791	38.1163	exon
NODE_4763856_length_74288_cov_17.330053 mapping	17904	SNV	1	T	A	Homozygous	124	124	100	0.169355	38.6855	exon
NODE_4763856_length_74288_cov_17.330053 mapping	17931	SNV	1	A	G	Homozygous	131	156	83.9744	0.274809	38.229	exon
NODE_4763856_length_74288_cov_17.330053 mapping	17949	SNV	1	C	A	Homozygous	150	154	97.4026	0.38	38.1067	exon
NODE_4763856_length_74288_cov_17.330053 mapping	17951	Deletion	1	A	-	Heterozygous	36	154	23.3766	0.305556	37.0833	exon
NODE_4763856_length_74288_cov_17.330053 mapping	17952	SNV	1	A	G	Heterozygous	102	154	66.2338	0.431373	38.3235	exon
NODE_4763856_length_74288_cov_17.330053 mapping	17959	SNV	1	G	T	Heterozygous	49	166	29.5181	0.408163	38.1429	exon
NODE_4763856_length_74288_cov_17.330053 mapping	17978	SNV	1	T	A	Heterozygous	4	176	2.27273	0.5	36.375	exon
NODE_4763856_length_74288_cov_17.330053 mapping	17978	MNV	2	TG	AA	Heterozygous	59	176	33.5227	0.389831	39.0508	exon
NODE_4763856_length_74288_cov_17.330053 mapping	18000	SNV	1	C	A	Heterozygous	36	151	23.8411	0.486486	38.5135	exon
NODE_4763856_length_74288_cov_17.330053 mapping	18005	SNV	1	A	G	Heterozygous	49	135	36.2963	0.387755	38.9592	exon
NODE_4763856_length_74288_cov_17.330053 mapping	18006	SNV	1	A	G	Heterozygous	59	122	48.3607	0.40678	38.7797	exon
NODE_4763856_length_74288_cov_17.330053 mapping	18008	SNV	1	T	C	Homozygous	97	121	80.1653	0.453608	38.4021	exon
NODE_4763856_length_74288_cov_17.330053 mapping	18024	SNV	1	G	C	Heterozygous	38	92	41.3043	0.368421	37.2368	exon
NODE_4763856_length_74288_cov_17.330053 mapping	18028	SNV	1	G	T	Heterozygous	36	82	43.9024	0.444444	35.4444	exon
NODE_4763856_length_74288_cov_17.330053 mapping	18040	SNV	1	C	A	Heterozygous	36	58	62.069	0.472222	37.3889	exon
NODE_4763856_length_74288_cov_17.330053 mapping	18046	SNV	1	A	C	Homozygous	38	41	92.6829	0.473684	37.3158	exon
NODE_4763856_length_74288_cov_17.330053 mapping	18052	SNV	1	A	G	Heterozygous	12	17	70.5882	0.333333	35.1667	exon
NODE_4763856_length_74288_cov_17.330053 mapping	18052	MNV	2	AC	GT	Heterozygous	5	17	29.4118	0.4	38.7	exon
NODE_4763856_length_74288_cov_17.330053 mapping	18055	MNV	2	AA	GC	Homozygous	17	17	100	0.411765	37.0882	exon
NODE_4763856_length_74288_cov_17.330053 mapping	18199	SNV	1	T	C	Homozygous	17	18	94.4444	0.294118	35.8235	exon
NODE_4763856_length_74288_cov_17.330053 mapping	18218	SNV	1	A	G	Homozygous	35	44	79.5455	0.314286	36.7714	exon
NODE_4763856_length_74288_cov_17.330053 mapping	18224	MNV	2	CT	TA	Heterozygous	16	55	29.0909	0.3125	38.5312	exon
NODE_4763856_length_74288_cov_17.330053 mapping	18225	SNV	1	T	A	Heterozygous	11	55	20	0.454545	38.6364	exon
NODE_4763856_length_74288_cov_17.330053 mapping	18229	SNV	1	A	G	Homozygous	53	58	91.3793	0.358491	38.3774	intron
NODE_4763856_length_74288_cov_17.330053 mapping	18235	SNV	1	T	A	Homozygous	70	73	95.8904	0.357143	37.9286	intron
NODE_4763856_length_74288_cov_17.330053 mapping	18327	SNV	1	C	A	Heterozygous	6	136	4.41176	0.5	36.9167	intron
NODE_4763856_length_74288_cov_17.330053 mapping	18327	MNV	2	CT	AC	Heterozygous	47	136	34.5588	0.489362	37.5484	intron
NODE_4763856_length_74288_cov_17.330053 mapping	18345	SNV	1	G	A	Homozygous	102	102	100	0.294118	38.4216	intron
NODE_4763856_length_74288_cov_17.330053 mapping	18369	SNV	1	T	A	Heterozygous	27	74	36.4865	0.37037	36.963	exon
NODE_4763856_length_74288_cov_17.330053 mapping	18377	SNV	1	C	A	Heterozygous	2	62	3.22581	0	43	exon
NODE_4763856_length_74288_cov_17.330053 mapping	18377	MNV	2	CC	AT	Heterozygous	16	62	25.8065	0.3125	38.2188	exon
NODE_4763856_length_74288_cov_17.330053 mapping	18378	SNV	1	C	T	Heterozygous	6	62	9.67742	0.166667	40.7	exon
NODE_4763856_length_74288_cov_17.330053 mapping	18380	SNV	1	G	C	Heterozygous	18	55	32.7273	0.388889	37.3889	exon
NODE_4763856_length_74288_cov_17.330053 mapping	18388	SNV	1	T	C	Homozygous	41	47	87.234	0.219512	37.122	exon
NODE_4763856_length_74288_cov_17.330053 mapping	18402	SNV	1	T	C	Homozygous	22	26	84.6154	0.272727	34.9545	exon
NODE_4763856_length_74288_cov_17.330053 mapping	18417	SNV	1	G	A	Homozygous	9	11	81.8182	0.444444	37	exon
NODE_4763856_length_74288_cov_17.330053 mapping	18540	SNV	1	T	A	Heterozygous	8	16	50	0.5	37	exon
NODE_4763856_length_74288_cov_17.330053 mapping	18540	SNV	1	T	C	Heterozygous	8	16	50	0.375	34.5	exon
NODE_4763856_length_74288_cov_17.330053 mapping	18544	SNV	1	T	G	Heterozygous	6	23	26.087	0.333333	39.1667	exon
NODE_4763856_length_74288_cov_17.330053 mapping	18546	SNV	1	G	A	Heterozygous	8	25	32	0.5	37	exon
NODE_4763856_length_74288_cov_17.330053 mapping	18554	MNV	2	CG	AA	Heterozygous	11	32	34.375	0.454545	37.7586	exon
NODE_4763856_length_74288_cov_17.330053 mapping	18556	SNV	1	C	T	Heterozygous	13	32	40.625	0.384615	36.9231	exon
NODE_4763856_length_74288_cov_17.330053 mapping	18568	SNV	1	A	G	Homozygous	36	38	94.7368	0.416667	36.1944	intron
NODE_4763856_length_74288_cov_17.330053 mapping	18570	SNV	1	A	C	Heterozygous	29	42	69.0476	0.37931	37.3448	intron
NODE_4763856_length_74288_cov_17.330053 mapping	18573	SNV	1	G	A	Heterozygous	23	48	47.9167	0.391304	35.2609	intron
NODE_4763856_length_74288_cov_17.330053 mapping	18588	Insertion	1	-	A	Heterozygous	17	68	25	0.411765	38.2353	intron
NODE_4763856_length_74288_cov_17.330053 mapping	18595	SNV	1	T	A	Heterozygous	24	75	32	0.291667	38.2083	intron
NODE_4763856_length_74288_cov_17.330053 mapping	18604	MNV	2	AG	GT	Heterozygous	35	86	40.6977	0.342857	35.8	intron
NODE_4763856_length_74288_cov_17.330053 mapping	18616	SNV	1	T	A	Heterozygous	72	94	76.5957	0.25	37.6389	intron
NODE_4763856_length_74288_cov_17.330053 mapping	18633	SNV	1	T	C	Heterozygous	75	105	71.4286	0.263158	36.6316	intron
NODE_4763856_length_74288_cov_17.330053 mapping	18668	SNV	1	C	A	Heterozygous	30	95	31.5789	0.40625	37.5	intron
NODE_4763856_length_74288_cov_17.330053 mapping	18670	SNV	1	C	A	Heterozygous	33	96	34.375	0.428571	38.0286	intron
NODE_4763856_length_74288_cov_17.330053 mapping	18695	SNV	1	G	C	Heterozygous	34	92	36.9565	0.416667	36.3889	intron
NODE_4763856_length_74288_cov_17.330053 mapping	18743	SNV	1	G	T	Heterozygous	34	75	45.3333	0.428571	39.2286	intron
NODE_4763856_length_74288_cov_17.330053 mapping	18758	SNV	1	G	T	Heterozygous	28	67	41.791	0.482759	38.1034	intron
NODE_4763856_length_74288_cov_17.330053 mapping	18802	SNV	1	A	T	Heterozygous	21	28	75	0.333333	35.1429	intron
NODE_4763856_length_74288_cov_17.330053 mapping	18802	SNV	1	A	C	Heterozygous	6	28	21.4286	0.333333	35.8333	intron
NODE_4763856_length_74288_cov_17.330053 mapping	18807	SNV	1	T	A	Heterozygous	12	23	52.1739	0.5	37.8333	intron
NODE_4763856_length_74288_cov_17.330053 mapping	18811	SNV	1	A	C	Heterozygous	12	19	63.1579	0.333333	37.25	intron
NODE_4763856_length_74288_cov_17.330053 mapping	18811	SNV	1	A	T	Heterozygous	7	19	36.8421	0.285714	37	intron
NODE_4763856_length_74288_cov_17.330053 mapping	18895	SNV	1	T	G	Homozygous	20	24	83.3333	0.4	36.5	intron
NODE_4763856_length_74288_cov_17.330053 mapping	18912	SNV	1	T	C	Heterozygous	34	47	72.3404	0.411765	36.0882	intron
NODE_4763856_length_74288_cov_17.330053 mapping	18928	SNV	1	A	G	Homozygous	54	55	98.1818	0.407407	36.3519	intron
NODE_4763856_length_74288_cov_17.330053 mapping	18930	SNV	1	T	C	Homozygous	54	55	98.1818	0.425926	36.5556	intron
NODE_4763856_length_74288_cov_17.330053 mapping	18932	SNV	1	C	T	Heterozygous	15	59	25.4237	0.4	38.4	intron
NODE_4763856_length_74288_cov_17.330053 mapping	18942	SNV	1	C	T	Heterozygous	21	67	31.3433	0.333333	37.619	intron
NODE_4763856_length_74288_cov_17.330053 mapping	18969	SNV	1	A	G	Heterozygous	23	88	26.1364	0.26087	37.0435	intron
NODE_4763856_length_74288_cov_17.330053 mapping	18998	SNV	1	C	T	Heterozygous	32	88	36.3636	0.3125	38.0625	intron
NODE_4763856_length_74288_cov_17.330053 mapping	19002	SNV	1	C	T	Heterozygous	43	82	52.439	0.27907	37.1628	intron
NODE_4763856_length_74288_cov_17.330053 mapping	19018	SNV	1	A	G	Heterozygous	26	87	29.8851	0.230769	36.6923	intron
NODE_4763856_length_74288_cov_17.330053 mapping	19090	SNV	1	A	G	Heterozygous	22	29	75.8621	0.363636	37.9091	intron
NODE_4763856_length_74288_cov_17.330053 mapping	19092	SNV	1	T	C	Heterozygous	20	28	71.4286	0.45	37	intron
NODE_4763856_length_74288_cov_17.330053 mapping	19092	SNV	1	T	A	Heterozygous	8	28	28.5714	0.125	36.375	intron
NODE_4763856_length_74288_cov_17.330053 mapping	19120	SNV	1	C	T	Heterozygous	10	34	29.4118	0.3	32.8	intron
NODE_4763856_length_74288_cov_17.330053 mapping	19130	SNV	1	G	A	Heterozygous	23	40	57.5	0.434783	35.5217	intron
NODE_4763856_length_74288_cov_17.330053 mapping	19155	SNV	1	G	A	Homozygous	66	73	90.411	0.409091	37.3636	intron
NODE_4763856_length_74288_cov_17.330053 mapping	19213	SNV	1	G	T	Heterozygous	31	124	25	0.483871	38.8387	intron
NODE_4763856_length_74288_cov_17.330053 mapping	19233	SNV	1	T	C	Homozygous	94	95	98.9474	0.446809	38.4894	intron
NODE_4763856_length_74288_cov_17.330053 mapping	19251	SNV	1	A	C	Heterozygous	32	82	39.0244	0.40625	38.5938	intron
NODE_4763856_length_74288_cov_17.330053 mapping	19292	SNV	1	C	A	Heterozygous	45	105	42.8571	0.288889	38.1556	intron
NODE_4763856_length_74288_cov_17.330053 mapping	19298	SNV	1	A	T	Heterozygous	22	102	21.5686	0.454545	36.7727	intron
NODE_4763856_length_74288_cov_17.330053 mapping	19304	SNV	1	A	T	Heterozygous	26	99	26.2626	0.423077	39.4615	intron
NODE_4763856_length_74288_cov_17.330053 mapping	19309	SNV	1	G	T	Heterozygous	25	100	25	0.24	37.72	intron
NODE_4763856_length_74288_cov_17.330053 mapping	19380	SNV	1	T	C	Heterozygous	20	63	31.746	0.45	34.9	intron
NODE_4763856_length_74288_cov_17.330053 mapping	19393	SNV	1	C	A	Homozygous	40	51	78.4314	0.243902	37.4146	intron
NODE_4763856_length_74288_cov_17.330053 mapping	19410	SNV	1	G	A	Heterozygous	16	59	27.1186	0.375	37.1875	intron
NODE_4763856_length_74288_cov_17.330053 mapping	19528	SNV	1	C	G	Homozygous	53	64	82.8125	0.0754717	37.717	intron
NODE_4763856_length_74288_cov_17.330053 mapping	19688	SNV	1	T	G	Heterozygous	10	36	27.7778	0.2	38.8	exon
NODE_4763856_length_74288_cov_17.330053 mapping	19740	SNV	1	A	C	Heterozygous	31	61	50.8197	0.290323	39.2258	exon
NODE_4763856_length_74288_cov_17.330053 mapping	19781	SNV	1	C	T	Heterozygous	16	53	30.1887	0.25	38.625	exon
NODE_4763856_length_74288_cov_17.330053 mapping	19787	SNV	1	A	G	Homozygous	50	51	98.0392	0.18	38.26	exon
NODE_4763856_length_74288_cov_17.330053 mapping	19800	SNV	1	C	A	Heterozygous	15	61	24.5902	0.266667	37.2	exon
NODE_4763856_length_74288_cov_17.330053 mapping	19836	SNV	1	C	T	Heterozygous	25	74	33.7838	0.32	38.84	intron
NODE_4763856_length_74288_cov_17.330053 mapping	19847	SNV	1	C	T	Heterozygous	23	68	33.8235	0.391304	36.3478	intron
NODE_4763856_length_74288_cov_17.330053 mapping	19900	SNV	1	C	A	Homozygous	34	40	85	0.411765	35.2647	intron
NODE_4763856_length_74288_cov_17.330053 mapping	19908	SNV	1	T	C	Homozygous	35	37	94.5946	0.4	36.8	exon
NODE_4763856_length_74288_cov_17.330053 mapping	19920	SNV	1	A	G	Homozygous	42	42	100	0.309524	36.8333	exon
NODE_4763856_length_74288_cov_17.330053 mapping	19934	SNV	1	C	A	Homozygous	43	43	100	0.325581	36.4651	exon
NODE_4763856_length_74288_cov_17.330053 mapping	19940	SNV	1	A	C	Homozygous	42	47	89.3617	0.333333	37.7857	exon
NODE_4763856_length_74288_cov_17.330053 mapping	19991	SNV	1	C	T	Homozygous	51	72	70.8333	0.372549	37.4118	exon
NODE_4763856_length_74288_cov_17.330053 mapping	20032	SNV	1	C	T	Heterozygous	27	94	28.7234	0.444444	34.963	exon
NODE_4763856_length_74288_cov_17.330053 mapping	20034	SNV	1	G	A	Heterozygous	34	93	36.5591	0.470588	32.7941	exon
NODE_4763856_length_74288_cov_17.330053 mapping	20079	SNV	1	A	T	Heterozygous	40	52	76.9231	0.4	36.9	intron
NODE_4763856_length_74288_cov_17.330053 mapping	20098	SNV	1	C	T	Homozygous	34	34	100	0.235294	36.1176	intron
NODE_4763856_length_74288_cov_17.330053 mapping	20111	Insertion	1	-	A	Homozygous	24	28	85.7143	0.208333	37.5417	intron
NODE_4763856_length_74288_cov_17.330053 mapping	20125	SNV	1	C	A	Homozygous	35	35	100	0.114286	37.2571	intron
NODE_4763856_length_74288_cov_17.330053 mapping	20171	SNV	1	T	C	Heterozygous	25	93	26.8817	0.2	38.92	exon
NODE_4763856_length_74288_cov_17.330053 mapping	20196	SNV	1	C	T	Homozygous	104	105	99.0476	0.238095	38.0857	exon
NODE_4763856_length_74288_cov_17.330053 mapping	20358	SNV	1	G	A	Heterozygous	46	131	35.1145	0.478261	36.8478	intron
NODE_4763856_length_74288_cov_17.330053 mapping	20370	Deletion	1	A	-	Heterozygous	29	119	24.3697	0.37931	36.7931	intron
NODE_4763856_length_74288_cov_17.330053 mapping	20372	SNV	1	A	T	Heterozygous	32	110	29.0909	0.5	36.5625	intron
NODE_4763856_length_74288_cov_17.330053 mapping	20382	SNV	1	G	T	Heterozygous	24	105	22.8571	0.125	37.5	intron
NODE_4763856_length_74288_cov_17.330053 mapping	20465	SNV	1	A	G	Homozygous	38	42	90.4762	0.184211	38.1579	intron
NODE_4763856_length_74288_cov_17.330053 mapping	20487	SNV	1	G	C	Heterozygous	11	51	21.5686	0.0909091	36.2727	intron
NODE_4763856_length_74288_cov_17.330053 mapping	20496	SNV	1	T	G	Homozygous	48	48	100	0.125	36.625	intron
NODE_4763856_length_74288_cov_17.330053 mapping	20515	SNV	1	G	A	Heterozygous	23	66	34.8485	0.130435	36.4348	intron
NODE_4763856_length_74288_cov_17.330053 mapping	20524	SNV	1	A	G	Homozygous	54	62	87.0968	0.109091	39.2909	intron
NODE_4763856_length_74288_cov_17.330053 mapping	20536	SNV	1	A	T	Heterozygous	21	59	35.5932	0.181818	37.4091	intron
NODE_4763856_length_74288_cov_17.330053 mapping	20590	SNV	1	G	A	Heterozygous	9	31	29.0323	0.111111	38	intron
NODE_4763856_length_74288_cov_17.330053 mapping	20655	SNV	1	G	T	Homozygous	13	13	100	0.461538	36.4615	intron
NODE_4763856_length_74288_cov_17.330053 mapping	20686	Insertion	1	-	A	Heterozygous	13	24	54.1667	0.142857	36.8571	intron
NODE_4763856_length_74288_cov_17.330053 mapping	20686	Insertion	1	-	C	Heterozygous	6	24	25	0.166667	39.1667	intron
NODE_4763856_length_74288_cov_17.330053 mapping	20715	SNV	1	C	T	Homozygous	49	49	100	0.204082	39.102	intron
NODE_4763856_length_74288_cov_17.330053 mapping	20724	MNV	2	CA	TG	Heterozygous	18	51	35.2941	0.222222	39.5278	intron
NODE_4763856_length_74288_cov_17.330053 mapping	20725	SNV	1	A	G	Heterozygous	33	51	64.7059	0.151515	39.1846	intron
NODE_4763856_length_74288_cov_17.330053 mapping	20737	SNV	1	G	A	Heterozygous	12	62	19.3548	0.0833333	39.25	intron
NODE_4763856_length_74288_cov_17.330053 mapping	20737	MNV	2	GC	AT	Heterozygous	3	62	4.83871	0.333333	38.1667	intron
NODE_4763856_length_74288_cov_17.330053 mapping	20738	SNV	1	C	T	Heterozygous	14	62	22.5806	0.285714	38.4615	intron
NODE_4763856_length_74288_cov_17.330053 mapping	20748	MNV	2	TT	GC	Heterozygous	12	58	20.6897	0.0833333	37.2174	intron
NODE_4763856_length_74288_cov_17.330053 mapping	20749	SNV	1	T	C	Heterozygous	46	58	79.3103	0.173913	39.6522	intron
NODE_4763856_length_74288_cov_17.330053 mapping	20791	SNV	1	A	G	Homozygous	56	58	96.5517	0.175439	37.8947	intron
NODE_4763856_length_74288_cov_17.330053 mapping	20810	SNV	1	A	T	Homozygous	58	59	98.3051	0.186441	35.4746	intron
NODE_4763856_length_74288_cov_17.330053 mapping	20884	SNV	1	A	C	Homozygous	69	73	94.5205	0.376812	37.2609	intron
NODE_4763856_length_74288_cov_17.330053 mapping	20910	SNV	1	C	T	Heterozygous	27	79	34.1772	0.481481	35.1852	intron
NODE_4763856_length_74288_cov_17.330053 mapping	20941	SNV	1	G	A	Homozygous	80	82	97.561	0.5	37.6875	intron
NODE_4763856_length_74288_cov_17.330053 mapping	20961	SNV	1	A	G	Homozygous	91	97	93.8144	0.494505	39.2967	intron
NODE_4763856_length_74288_cov_17.330053 mapping	20998	SNV	1	A	G	Homozygous	125	130	96.1538	0.44	38.72	intron
NODE_4763856_length_74288_cov_17.330053 mapping	21010	SNV	1	G	A	Homozygous	132	133	99.2481	0.448529	38.2941	intron
NODE_4763856_length_74288_cov_17.330053 mapping	21023	SNV	1	G	A	Heterozygous	44	143	30.7692	0.444444	36.0667	intron
NODE_4763856_length_74288_cov_17.330053 mapping	21062	SNV	1	T	C	Heterozygous	20	90	22.2222	0.3	38.3	intron
NODE_4763856_length_74288_cov_17.330053 mapping	21065	Deletion	2	TC	-	Heterozygous	49	88	55.6818	0.387755	38.5102	intron
NODE_4763856_length_74288_cov_17.330053 mapping	21066	Deletion	1	C	-	Heterozygous	39	88	44.3182	0.410256	36.3425	intron
NODE_4763856_length_74288_cov_17.330053 mapping	21103	SNV	1	A	T	Homozygous	22	25	88	0.272727	37.5909	intron
NODE_4763856_length_74288_cov_17.330053 mapping	21215	SNV	1	G	T	Homozygous	7	13	53.8462	0.285714	33.1429	intron
NODE_4763856_length_74288_cov_17.330053 mapping	21244	Deletion	3	TTC	-	Heterozygous	13	36	36.1111	0.307692	39.4615	intron
NODE_4763856_length_74288_cov_17.330053 mapping	21245	Deletion	2	TC	-	Heterozygous	6	36	16.6667	0.333333	39.4444	intron
NODE_4763856_length_74288_cov_17.330053 mapping	21246	SNV	1	C	T	Heterozygous	17	36	47.2222	0.411765	37.451	intron
NODE_4763856_length_74288_cov_17.330053 mapping	21317	SNV	1	T	G	Heterozygous	36	153	23.5294	0.444444	38.6389	intron
NODE_4763856_length_74288_cov_17.330053 mapping	21337	SNV	1	G	T	Heterozygous	41	169	24.2604	0.341463	38.9756	intron
NODE_4763856_length_74288_cov_17.330053 mapping	21346	SNV	1	T	C	Heterozygous	69	172	40.1163	0.362319	37.8551	intron
NODE_4763856_length_74288_cov_17.330053 mapping	21357	SNV	1	G	A	Heterozygous	36	145	24.8276	0.472222	38.9722	intron
NODE_4763856_length_74288_cov_17.330053 mapping	21360	SNV	1	A	T	Heterozygous	107	142	75.3521	0.457944	37.0748	intron
NODE_4763856_length_74288_cov_17.330053 mapping	21360	SNV	1	A	C	Heterozygous	35	142	24.6479	0.342857	36.8571	intron
NODE_4763856_length_74288_cov_17.330053 mapping	21369	SNV	1	T	C	Homozygous	118	136	86.7647	0.495798	38.1345	intron
NODE_4763856_length_74288_cov_17.330053 mapping	21376	SNV	1	T	C	Heterozygous	33	149	22.1477	0.424242	38.4545	intron
NODE_4763856_length_74288_cov_17.330053 mapping	21395	SNV	1	G	A	Heterozygous	89	124	71.7742	0.426966	36.7572	intron
NODE_4763856_length_74288_cov_17.330053 mapping	21395	MNV	2	GG	AA	Heterozygous	35	124	28.2258	0.371429	39.5797	intron
NODE_4763856_length_74288_cov_17.330053 mapping	21398	SNV	1	C	T	Heterozygous	34	125	27.2	0.441176	38.4118	intron
NODE_4763856_length_74288_cov_17.330053 mapping	21415	SNV	1	C	T	Heterozygous	76	120	63.3333	0.486842	35.4868	intron
NODE_4763856_length_74288_cov_17.330053 mapping	21424	SNV	1	C	T	Heterozygous	61	125	48.8	0.42623	38.4754	intron
NODE_4763856_length_74288_cov_17.330053 mapping	21441	SNV	1	G	A	Homozygous	108	109	99.0826	0.5	38.8148	intron
NODE_4763856_length_74288_cov_17.330053 mapping	21579	SNV	1	G	A	Homozygous	49	50	98	0.408163	37.449	intron
NODE_4763856_length_74288_cov_17.330053 mapping	21669	SNV	1	T	G	Heterozygous	37	164	22.561	0.378378	39.2162	intron
NODE_4763856_length_74288_cov_17.330053 mapping	21683	SNV	1	T	A	Homozygous	147	153	96.0784	0.435374	38.6803	intron
NODE_4763856_length_74288_cov_17.330053 mapping	21685	SNV	1	A	G	Heterozygous	45	161	27.9503	0.488889	38.3778	intron
NODE_4763856_length_74288_cov_17.330053 mapping	21707	SNV	1	G	A	Heterozygous	39	131	29.771	0.435897	38.5385	intron
NODE_4763856_length_74288_cov_17.330053 mapping	21715	Deletion	1	C	-	Heterozygous	60	115	52.1739	0.416667	37.9	intron
NODE_4763856_length_74288_cov_17.330053 mapping	21715	SNV	1	C	A	Heterozygous	49	115	42.6087	0.489796	37.9184	intron
NODE_4763856_length_74288_cov_17.330053 mapping	21725	SNV	1	C	G	Heterozygous	76	102	74.5098	0.473684	36.4342	intron
NODE_4763856_length_74288_cov_17.330053 mapping	21725	MNV	2	CG	GA	Heterozygous	26	102	25.4902	0.384615	37.3846	intron
NODE_4763856_length_74288_cov_17.330053 mapping	21776	SNV	1	A	T	Heterozygous	25	106	23.5849	0.36	38	intron
NODE_4763856_length_74288_cov_17.330053 mapping	21781	SNV	1	G	A	Heterozygous	59	98	60.2041	0.288136	37.1525	intron
NODE_4763856_length_74288_cov_17.330053 mapping	21790	SNV	1	T	C	Homozygous	69	93	74.1935	0.333333	38.3333	intron
NODE_4763856_length_74288_cov_17.330053 mapping	21796	SNV	1	C	G	Homozygous	76	86	88.3721	0.276316	38.7632	intron
NODE_4763856_length_74288_cov_17.330053 mapping	21855	SNV	1	T	C	Heterozygous	38	135	28.1481	0.368421	39.3158	intron
NODE_4763856_length_74288_cov_17.330053 mapping	21863	Insertion	1	-	A	Heterozygous	95	136	69.8529	0.333333	38.9375	intron
NODE_4763856_length_74288_cov_17.330053 mapping	21926	SNV	1	A	T	Homozygous	91	105	86.6667	0.44086	37.4624	intron
NODE_4763856_length_74288_cov_17.330053 mapping	21946	SNV	1	T	C	Heterozygous	26	99	26.2626	0.423077	38.4231	intron
NODE_4763856_length_74288_cov_17.330053 mapping	21990	SNV	1	G	A	Homozygous	22	23	95.6522	0.391304	38.4783	intron
NODE_4763856_length_74288_cov_17.330053 mapping	22012	SNV	1	G	A	Heterozygous	13	34	38.2353	0.384615	38.9231	intron
NODE_4763856_length_74288_cov_17.330053 mapping	22015	Deletion	1	A	-	Heterozygous	14	35	40	0.5	37.5714	intron
NODE_4763856_length_74288_cov_17.330053 mapping	22023	Deletion	1	A	-	Heterozygous	23	39	58.9744	0.347826	37.3043	intron
NODE_4763856_length_74288_cov_17.330053 mapping	22023	SNV	1	A	T	Heterozygous	14	39	35.8974	0.428571	37.6429	intron
NODE_4763856_length_74288_cov_17.330053 mapping	22035	SNV	1	T	G	Homozygous	52	53	98.1132	0.423077	37.6346	intron
NODE_4763856_length_74288_cov_17.330053 mapping	22050	SNV	1	T	A	Heterozygous	26	66	39.3939	0.269231	37	intron
NODE_4763856_length_74288_cov_17.330053 mapping	22070	SNV	1	C	G	Heterozygous	19	83	22.8916	0.263158	39.1579	intron
NODE_4763856_length_74288_cov_17.330053 mapping	22079	SNV	1	G	A	Heterozygous	29	85	34.1176	0.344828	37.931	intron
NODE_4763856_length_74288_cov_17.330053 mapping	22103	SNV	1	T	G	Homozygous	88	91	96.7033	0.477273	38.3068	intron
NODE_4763856_length_74288_cov_17.330053 mapping	22131	SNV	1	G	T	Heterozygous	21	83	25.3012	0.428571	38.8095	intron
NODE_4763856_length_74288_cov_17.330053 mapping	22137	SNV	1	A	G	Homozygous	57	74	77.027	0.491228	38.3333	intron
NODE_4763856_length_74288_cov_17.330053 mapping	22141	SNV	1	C	A	Heterozygous	21	74	28.3784	0.285714	38.7143	intron
NODE_4763856_length_74288_cov_17.330053 mapping	22144	SNV	1	T	G	Heterozygous	18	73	24.6575	0.5	38.0556	intron
NODE_4763856_length_74288_cov_17.330053 mapping	22145	SNV	1	G	A	Heterozygous	21	72	29.1667	0.285714	38.8095	intron
NODE_4763856_length_74288_cov_17.330053 mapping	22152	SNV	1	G	T	Heterozygous	16	67	23.8806	0.5	38.5625	intron
NODE_4763856_length_74288_cov_17.330053 mapping	22178	MNV	2	TG	CA	Heterozygous	12	50	24	0.5	35.96	intron
NODE_4763856_length_74288_cov_17.330053 mapping	22193	SNV	1	A	G	Homozygous	33	34	97.0588	0.333333	37.3636	intron
NODE_4763856_length_74288_cov_17.330053 mapping	22202	SNV	1	T	G	Homozygous	44	44	100	0.409091	36.4773	intron
NODE_4763856_length_74288_cov_17.330053 mapping	22214	SNV	1	A	G	Heterozygous	14	52	26.9231	0.428571	37.6429	intron
NODE_4763856_length_74288_cov_17.330053 mapping	22242	SNV	1	T	C	Homozygous	67	67	100	0.477612	37.9851	intron
NODE_4763856_length_74288_cov_17.330053 mapping	22263	SNV	1	A	C	Heterozygous	26	78	33.3333	0.461538	36.6538	intron
NODE_4763856_length_74288_cov_17.330053 mapping	22302	SNV	1	A	G	Homozygous	39	43	90.6977	0.435897	36.4359	intron
NODE_4763856_length_74288_cov_17.330053 mapping	22518	SNV	1	C	A	Heterozygous	21	51	41.1765	0.190476	38.0476	intron
NODE_4763856_length_74288_cov_17.330053 mapping	22526	SNV	1	G	T	Heterozygous	15	57	26.3158	0.266667	38.6	intron
NODE_4763856_length_74288_cov_17.330053 mapping	22568	MNV	2	AG	TA	Heterozygous	14	54	25.9259	0.214286	37.2143	intron
NODE_4763856_length_74288_cov_17.330053 mapping	22574	SNV	1	C	A	Heterozygous	13	52	25	0.285714	31.8571	intron
NODE_4763856_length_74288_cov_17.330053 mapping	22596	SNV	1	A	T	Homozygous	42	44	95.4545	0.214286	38.8333	intron
NODE_4763856_length_74288_cov_17.330053 mapping	22620	SNV	1	A	T	Heterozygous	7	29	24.1379	0.428571	38.8571	intron
NODE_4763856_length_74288_cov_17.330053 mapping	22624	SNV	1	G	A	Heterozygous	13	26	50	0.230769	36.3077	intron
NODE_4763856_length_74288_cov_17.330053 mapping	22624	SNV	1	G	T	Heterozygous	8	26	30.7692	0.25	40.25	intron
NODE_4763856_length_74288_cov_17.330053 mapping	22630	SNV	1	A	T	Heterozygous	7	26	26.9231	0.285714	40.4286	intron
NODE_4763856_length_74288_cov_17.330053 mapping	22633	SNV	1	C	T	Heterozygous	8	24	33.3333	0.375	39.375	intron
NODE_4763856_length_74288_cov_17.330053 mapping	22637	Deletion	1	T	-	Heterozygous	7	24	29.1667	0.285714	34.8571	intron
NODE_4763856_length_74288_cov_17.330053 mapping	22639	SNV	1	T	A	Heterozygous	9	25	36	0.333333	35.1111	intron
NODE_4763856_length_74288_cov_17.330053 mapping	22655	SNV	1	A	T	Homozygous	37	46	80.4348	0.135135	39.1892	intron
NODE_4763856_length_74288_cov_17.330053 mapping	22682	SNV	1	A	T	Homozygous	19	77	24.6753	0.105263	38.6842	intron
NODE_4763856_length_74288_cov_17.330053 mapping	22737	SNV	1	A	G	Heterozygous	102	149	68.4564	0.0952381	39.0762	intron
NODE_4763856_length_74288_cov_17.330053 mapping	22801	Insertion	1	-	A	Heterozygous	63	127	49.6063	0.396825	38.0476	intron
NODE_4763856_length_74288_cov_17.330053 mapping	22808	SNV	1	G	A	Homozygous	99	101	98.0198	0.393939	35.9798	intron
NODE_4763856_length_74288_cov_17.330053 mapping	22904	SNV	1	G	A	Heterozygous	46	175	26.2857	0.434783	37.2391	intron
NODE_4763856_length_74288_cov_17.330053 mapping	22950	SNV	1	T	C	Heterozygous	69	151	45.6954	0.289855	38.8696	intron
NODE_4763856_length_74288_cov_17.330053 mapping	22969	SNV	1	A	G	Homozygous	117	121	96.6942	0.333333	37.7521	intron
NODE_4763856_length_74288_cov_17.330053 mapping	22977	SNV	1	A	G	Heterozygous	66	110	60	0.363636	37.2879	intron
NODE_4763856_length_74288_cov_17.330053 mapping	23002	SNV	1	T	C	Heterozygous	21	85	24.7059	0.285714	38.6667	intron
NODE_4763856_length_74288_cov_17.330053 mapping	23012	SNV	1	A	C	Heterozygous	50	76	65.7895	0.4	37.92	intron
NODE_4763856_length_74288_cov_17.330053 mapping	23027	SNV	1	A	G	Homozygous	62	65	95.3846	0.467742	37.3871	intron
NODE_4763856_length_74288_cov_17.330053 mapping	23056	SNV	1	A	G	Heterozygous	36	77	46.7532	0.361111	36.4444	intron
NODE_4763856_length_74288_cov_17.330053 mapping	23085	SNV	1	G	A	Homozygous	62	65	95.3846	0.370968	36.0484	intron
NODE_4763856_length_74288_cov_17.330053 mapping	23089	SNV	1	A	G	Homozygous	60	63	95.2381	0.366667	37.2167	intron
NODE_4763856_length_74288_cov_17.330053 mapping	23094	SNV	1	G	A	Heterozygous	23	69	33.3333	0.173913	35.6522	intron
NODE_4763856_length_74288_cov_17.330053 mapping	23098	SNV	1	C	G	Homozygous	60	67	89.5522	0.383333	37.3167	intron
NODE_4763856_length_74288_cov_17.330053 mapping	23140	SNV	1	A	C	Homozygous	35	47	74.4681	0.371429	36.6857	intron
NODE_4763856_length_74288_cov_17.330053 mapping	23144	SNV	1	T	A	Heterozygous	14	46	30.4348	0.357143	36.7857	intron
NODE_4763856_length_74288_cov_17.330053 mapping	23146	SNV	1	T	C	Heterozygous	24	40	60	0.333333	36.5417	intron
NODE_4763856_length_74288_cov_17.330053 mapping	23159	SNV	1	A	T	Heterozygous	12	31	38.7097	0.25	39.5	intron
NODE_4763856_length_74288_cov_17.330053 mapping	23166	SNV	1	T	C	Homozygous	20	26	76.9231	0.2	38.75	intron
NODE_4763856_length_74288_cov_17.330053 mapping	23178	SNV	1	A	G	Heterozygous	13	23	56.5217	0.307692	38.5385	intron
NODE_4763856_length_74288_cov_17.330053 mapping	23184	SNV	1	A	G	Heterozygous	10	22	45.4545	0.3	38.7	intron
NODE_4763856_length_74288_cov_17.330053 mapping	23203	Insertion	1	-	T	Heterozygous	3	11	27.2727	0.333333	30.3333	intron
NODE_4763856_length_74288_cov_17.330053 mapping	23284	MNV	2	CT	TC	Heterozygous	4	10	40	0.5	38.625	intron
NODE_4763856_length_74288_cov_17.330053 mapping	23285	SNV	1	T	C	Heterozygous	6	10	60	0.5	33.9167	intron
NODE_4763856_length_74288_cov_17.330053 mapping	23294	SNV	1	A	C	Homozygous	12	13	92.3077	0.5	37.8333	intron
NODE_4763856_length_74288_cov_17.330053 mapping	23298	SNV	1	T	A	Heterozygous	4	13	30.7692	0.25	35.75	intron
NODE_4763856_length_74288_cov_17.330053 mapping	23300	SNV	1	T	C	Heterozygous	6	13	46.1538	0.333333	35.6667	intron
NODE_4763856_length_74288_cov_17.330053 mapping	23300	SNV	1	T	A	Heterozygous	4	13	30.7692	0.5	37.75	intron
NODE_4763856_length_74288_cov_17.330053 mapping	23313	SNV	1	A	T	Heterozygous	8	26	30.7692	0.5	37.75	intron
NODE_4763856_length_74288_cov_17.330053 mapping	23320	SNV	1	T	C	Homozygous	25	28	89.2857	0.48	37.32	intron
NODE_4763856_length_74288_cov_17.330053 mapping	23338	SNV	1	A	G	Heterozygous	25	48	52.0833	0.4	37.6	intron
NODE_4763856_length_74288_cov_17.330053 mapping	23363	SNV	1	C	T	Homozygous	49	74	66.2162	0.408163	36.2041	intron
NODE_4763856_length_74288_cov_17.330053 mapping	23368	SNV	1	A	T	Heterozygous	17	79	21.519	0.411765	38.3529	intron
NODE_4763856_length_74288_cov_17.330053 mapping	23411	SNV	1	T	C	Heterozygous	41	93	44.086	0.365854	38.2927	intron
NODE_4763856_length_74288_cov_17.330053 mapping	23413	SNV	1	A	G	Homozygous	83	91	91.2088	0.313253	37.3614	intron
NODE_4763856_length_74288_cov_17.330053 mapping	23438	SNV	1	T	C	Homozygous	73	87	83.908	0.260274	36.7397	intron
NODE_4763856_length_74288_cov_17.330053 mapping	23467	Deletion	1	T	-	Heterozygous	22	76	28.9474	0.304348	36.1739	intron
NODE_4763856_length_74288_cov_17.330053 mapping	23487	SNV	1	T	A	Homozygous	70	70	100	0.408451	35.8732	intron
NODE_4763856_length_74288_cov_17.330053 mapping	23509	SNV	1	A	G	Homozygous	54	72	75	0.454545	35.7273	intron
NODE_4763856_length_74288_cov_17.330053 mapping	23517	SNV	1	A	C	Heterozygous	32	78	41.0256	0.424242	37.0606	intron
NODE_4763856_length_74288_cov_17.330053 mapping	23524	SNV	1	A	T	Heterozygous	17	80	21.25	0.411765	38.1765	intron
NODE_4763856_length_74288_cov_17.330053 mapping	23550	SNV	1	A	C	Heterozygous	36	79	45.5696	0.416667	37.9583	intron
NODE_4763856_length_74288_cov_17.330053 mapping	23550	Replacement	2	A	CT	Heterozygous	32	79	40.5063	0.40625	37.8906	intron
NODE_4763856_length_74288_cov_17.330053 mapping	23550	SNV	1	A	T	Heterozygous	11	79	13.9241	0.454545	38.0476	intron
NODE_4763856_length_74288_cov_17.330053 mapping	23559	SNV	1	G	T	Homozygous	74	80	92.5	0.445946	36.8919	intron
NODE_4763856_length_74288_cov_17.330053 mapping	23571	SNV	1	T	A	Homozygous	103	104	99.0385	0.495146	37.2233	intron
NODE_4763856_length_74288_cov_17.330053 mapping	23683	SNV	1	T	C	Homozygous	69	70	98.5714	0.391304	37.4493	intron
NODE_4763856_length_74288_cov_17.330053 mapping	23692	Insertion	1	-	C	Homozygous	53	53	100	0.462963	36.2593	intron
NODE_4763856_length_74288_cov_17.330053 mapping	23694	SNV	1	C	T	Heterozygous	14	53	26.4151	0.357143	36.3571	intron
NODE_4763856_length_74288_cov_17.330053 mapping	23697	SNV	1	T	G	Homozygous	46	47	97.8723	0.468085	36.5745	intron
NODE_4763856_length_74288_cov_17.330053 mapping	23700	SNV	1	A	G	Homozygous	40	49	81.6327	0.487805	36.2439	intron
NODE_4763856_length_74288_cov_17.330053 mapping	23720	Insertion	1	-	C	Heterozygous	17	70	24.2857	0.470588	38.7059	intron
NODE_4763856_length_74288_cov_17.330053 mapping	23726	Insertion	2	-	AC	Heterozygous	32	91	35.1648	0.5	39.0938	intron
NODE_4763856_length_74288_cov_17.330053 mapping	23726	SNV	1	A	C	Heterozygous	24	91	26.3736	0.375	35.0571	intron
NODE_4763856_length_74288_cov_17.330053 mapping	23767	SNV	1	G	T	Heterozygous	37	155	23.871	0.342105	36.8947	intron
NODE_4763856_length_74288_cov_17.330053 mapping	23780	SNV	1	A	G	Homozygous	111	137	81.0219	0.419643	36.7054	intron
NODE_4763856_length_74288_cov_17.330053 mapping	23783	SNV	1	T	C	Homozygous	121	132	91.6667	0.442623	37.7705	intron
NODE_4763856_length_74288_cov_17.330053 mapping	23841	SNV	1	G	A	Heterozygous	26	86	30.2326	0.384615	37.9615	intron
NODE_4763856_length_74288_cov_17.330053 mapping	23854	SNV	1	T	C	Homozygous	70	72	97.2222	0.5	37.5857	intron
NODE_4763856_length_74288_cov_17.330053 mapping	23861	SNV	1	G	A	Heterozygous	26	77	33.7662	0.5	37.3462	intron
NODE_4763856_length_74288_cov_17.330053 mapping	23866	SNV	1	T	C	Heterozygous	46	77	59.7403	0.434783	36.2391	intron
NODE_4763856_length_74288_cov_17.330053 mapping	23866	SNV	1	T	A	Heterozygous	19	77	24.6753	0.368421	36.5789	intron
NODE_4763856_length_74288_cov_17.330053 mapping	23874	SNV	1	A	C	Heterozygous	23	85	27.0588	0.434783	35.7826	intron
NODE_4763856_length_74288_cov_17.330053 mapping	23879	SNV	1	A	G	Heterozygous	61	89	68.5393	0.491803	37.3115	intron
NODE_4763856_length_74288_cov_17.330053 mapping	23908	SNV	1	C	T	Heterozygous	34	105	32.381	0.416667	35.3056	intron
NODE_4763856_length_74288_cov_17.330053 mapping	23913	SNV	1	G	A	Heterozygous	28	104	26.9231	0.464286	37.9286	intron
NODE_4763856_length_74288_cov_17.330053 mapping	23932	SNV	1	G	A	Heterozygous	44	104	42.3077	0.177778	37.8	intron
NODE_4763856_length_74288_cov_17.330053 mapping	23947	SNV	1	A	G	Heterozygous	65	92	70.6522	0.246154	38.4154	intron
NODE_4763856_length_74288_cov_17.330053 mapping	23953	SNV	1	T	G	Heterozygous	27	88	30.6818	0.296296	37.7407	intron
NODE_4763856_length_74288_cov_17.330053 mapping	23963	SNV	1	A	G	Heterozygous	31	82	37.8049	0.290323	37.5161	intron
NODE_4763856_length_74288_cov_17.330053 mapping	23979	SNV	1	A	G	Heterozygous	19	62	30.6452	0.368421	39.2105	intron
NODE_4763856_length_74288_cov_17.330053 mapping	23985	SNV	1	T	C	Homozygous	50	51	98.0392	0.26	36.78	intron
NODE_4763856_length_74288_cov_17.330053 mapping	24004	SNV	1	A	G	Heterozygous	11	38	28.9474	0.0909091	38.3636	intron
NODE_4763856_length_74288_cov_17.330053 mapping	24019	SNV	1	A	C	Heterozygous	8	21	38.0952	0.25	34.75	intron
NODE_4763856_length_74288_cov_17.330053 mapping	24022	SNV	1	C	A	Homozygous	21	21	100	0.142857	38.9524	intron
NODE_4763856_length_74288_cov_17.330053 mapping	24044	SNV	1	A	C	Heterozygous	22	35	62.8571	0.0909091	34.7273	intron
NODE_4763856_length_74288_cov_17.330053 mapping	24081	SNV	1	T	A	Heterozygous	16	43	37.2093	0.125	36.5625	intron
NODE_4763856_length_74288_cov_17.330053 mapping	24100	SNV	1	A	C	Heterozygous	14	39	35.8974	0.142857	37.2857	intron
NODE_4763856_length_74288_cov_17.330053 mapping	24130	SNV	1	G	A	Heterozygous	9	30	30	0.222222	38.1111	intron
NODE_4763856_length_74288_cov_17.330053 mapping	24137	SNV	1	A	G	Homozygous	24	25	96	0.208333	37.2083	intron
NODE_4763856_length_74288_cov_17.330053 mapping	24145	SNV	1	T	C	Homozygous	22	23	95.6522	0.181818	38.5909	intron
NODE_4763856_length_74288_cov_17.330053 mapping	24155	SNV	1	A	G	Homozygous	18	19	94.7368	0.388889	36	intron
NODE_4763856_length_74288_cov_17.330053 mapping	24198	SNV	1	C	T	Heterozygous	5	12	41.6667	0.4	33.8	intron
NODE_4763856_length_74288_cov_17.330053 mapping	24490	SNV	1	G	A	Heterozygous	5	13	38.4615	0.4	38.8	intron
NODE_4763856_length_74288_cov_17.330053 mapping	24507	SNV	1	G	A	Homozygous	22	25	88	0.227273	38.0909	intron
NODE_4763856_length_74288_cov_17.330053 mapping	24554	SNV	1	G	T	Heterozygous	18	67	26.8657	0.0555556	37.8889	intron
NODE_4763856_length_74288_cov_17.330053 mapping	24565	SNV	1	T	C	Homozygous	77	77	100	0.0779221	34.8182	intron
NODE_4763856_length_74288_cov_17.330053 mapping	24574	SNV	1	A	G	Homozygous	59	77	76.6234	0.0677966	37.6271	intron
NODE_4763856_length_74288_cov_17.330053 mapping	24629	SNV	1	G	A	Homozygous	84	87	96.5517	0.0941176	36.1882	intron
NODE_4763856_length_74288_cov_17.330053 mapping	24643	SNV	1	G	A	Heterozygous	35	76	46.0526	0.194444	37.1111	intron
NODE_4763856_length_74288_cov_17.330053 mapping	24685	SNV	1	C	G	Heterozygous	34	108	31.4815	0.285714	36.3429	intron
NODE_4763856_length_74288_cov_17.330053 mapping	24694	SNV	1	T	C	Homozygous	109	113	96.4602	0.390909	37.1182	intron
NODE_4763856_length_74288_cov_17.330053 mapping	24701	Deletion	1	A	-	Heterozygous	87	116	75	0.413793	36.8506	intron
NODE_4763856_length_74288_cov_17.330053 mapping	24734	Replacement	4	TAAT	C	Heterozygous	30	127	23.622	0.466667	36.8333	intron
NODE_4763856_length_74288_cov_17.330053 mapping	24760	SNV	1	C	T	Heterozygous	41	141	29.078	0.414634	38.561	intron
NODE_4763856_length_74288_cov_17.330053 mapping	24764	SNV	1	C	T	Heterozygous	49	131	37.4046	0.408163	39.1633	intron
NODE_4763856_length_74288_cov_17.330053 mapping	24772	SNV	1	G	C	Heterozygous	91	130	70	0.430108	38.0645	intron
NODE_4763856_length_74288_cov_17.330053 mapping	24772	SNV	1	G	T	Heterozygous	39	130	30	0.384615	38.6154	intron
NODE_4763856_length_74288_cov_17.330053 mapping	24779	MNV	2	TA	CT	Heterozygous	37	141	26.2411	0.432432	38.04	intron
NODE_4763856_length_74288_cov_17.330053 mapping	24780	SNV	1	A	T	Heterozygous	18	141	12.766	0.388889	35.4	intron
NODE_4763856_length_74288_cov_17.330053 mapping	24810	MNV	2	TC	AA	Heterozygous	50	150	33.3333	0.42	38.32	intron
NODE_4763856_length_74288_cov_17.330053 mapping	24836	SNV	1	T	G	Homozygous	121	129	93.7984	0.380165	38.5041	intron
NODE_4763856_length_74288_cov_17.330053 mapping	24840	SNV	1	G	A	Heterozygous	49	129	37.9845	0.428571	37.4286	intron
NODE_4763856_length_74288_cov_17.330053 mapping	24845	SNV	1	C	G	Heterozygous	29	118	24.5763	0.310345	36.8276	intron
NODE_4763856_length_74288_cov_17.330053 mapping	24847	SNV	1	A	G	Homozygous	109	117	93.1624	0.366972	38.9266	intron
NODE_4763856_length_74288_cov_17.330053 mapping	24856	SNV	1	G	T	Heterozygous	45	123	36.5854	0.377778	38.7556	intron
NODE_4763856_length_74288_cov_17.330053 mapping	24861	SNV	1	G	A	Heterozygous	38	116	32.7586	0.315789	38.2105	intron
NODE_4763856_length_74288_cov_17.330053 mapping	24870	SNV	1	T	C	Heterozygous	40	111	36.036	0.425	38.4	intron
NODE_4763856_length_74288_cov_17.330053 mapping	24898	SNV	1	T	C	Homozygous	63	64	98.4375	0.253968	36.9841	intron
NODE_4763856_length_74288_cov_17.330053 mapping	24901	SNV	1	G	A	Homozygous	64	64	100	0.25	36.2812	intron
NODE_4763856_length_74288_cov_17.330053 mapping	24904	SNV	1	G	A	Heterozygous	22	72	30.5556	0.272727	36	intron
NODE_4763856_length_74288_cov_17.330053 mapping	24912	SNV	1	T	C	Homozygous	52	66	78.7879	0.211538	35.0769	intron
NODE_4763856_length_74288_cov_17.330053 mapping	24914	SNV	1	G	T	Heterozygous	21	65	32.3077	0.0952381	34	intron
NODE_4763856_length_74288_cov_17.330053 mapping	24917	SNV	1	C	T	Homozygous	55	61	90.1639	0.145455	37.2727	intron
NODE_4763856_length_74288_cov_17.330053 mapping	32226	SNV	1	A	G	Homozygous	75	77	97.4026	0.146667	36.9067	intron
NODE_4763856_length_74288_cov_17.330053 mapping	32237	SNV	1	G	T	Heterozygous	29	78	37.1795	0.275862	30.2069	intron
NODE_4763856_length_74288_cov_17.330053 mapping	32245	SNV	1	A	G	Homozygous	80	80	100	0.3	36.4375	intron
NODE_4763856_length_74288_cov_17.330053 mapping	32274	SNV	1	A	G	Heterozygous	28	97	28.866	0.428571	36.0357	intron
NODE_4763856_length_74288_cov_17.330053 mapping	32288	SNV	1	G	A	Homozygous	103	103	100	0.417476	33.8932	intron
NODE_4763856_length_74288_cov_17.330053 mapping	32293	SNV	1	T	C	Heterozygous	35	109	32.1101	0.428571	35.0286	intron
NODE_4763856_length_74288_cov_17.330053 mapping	32303	SNV	1	A	G	Homozygous	104	104	100	0.365385	36.625	intron
NODE_4763856_length_74288_cov_17.330053 mapping	32336	SNV	1	T	C	Homozygous	112	112	100	0.336283	36.2124	intron
NODE_4763856_length_74288_cov_17.330053 mapping	32341	SNV	1	T	C	Homozygous	104	104	100	0.352381	35.2095	intron
NODE_4763856_length_74288_cov_17.330053 mapping	32344	SNV	1	A	C	Homozygous	104	104	100	0.352381	36.8476	intron
NODE_4763856_length_74288_cov_17.330053 mapping	32354	SNV	1	C	T	Homozygous	114	119	95.7983	0.408696	36.0696	intron
NODE_4763856_length_74288_cov_17.330053 mapping	32374	SNV	1	C	A	Homozygous	126	126	100	0.373016	36.7222	intron
NODE_4763856_length_74288_cov_17.330053 mapping	32387	SNV	1	C	T	Heterozygous	32	130	24.6154	0.46875	36.4062	intron
NODE_4763856_length_74288_cov_17.330053 mapping	32427	SNV	1	T	C	Homozygous	74	88	84.0909	0.391892	37.4459	intron
NODE_4763856_length_74288_cov_17.330053 mapping	32443	SNV	1	T	C	Homozygous	65	67	97.0149	0.353846	37.5077	intron
NODE_4763856_length_74288_cov_17.330053 mapping	32454	SNV	1	A	T	Homozygous	29	31	93.5484	0.37931	38.1034	intron
NODE_4763856_length_74288_cov_17.330053 mapping	32457	SNV	1	C	A	Homozygous	29	31	93.5484	0.310345	38.1724	intron
NODE_4763856_length_74288_cov_17.330053 mapping	32460	Deletion	1	A	-	Heterozygous	13	48	27.0833	0.307692	37.2308	intron
NODE_4763856_length_74288_cov_17.330053 mapping	32469	SNV	1	G	T	Heterozygous	8	25	32	0.25	36.5	intron
NODE_4763856_length_74288_cov_17.330053 mapping	32471	SNV	1	T	C	Heterozygous	17	27	62.963	0.117647	39.0588	intron
NODE_4763856_length_74288_cov_17.330053 mapping	32474	SNV	1	G	A	Heterozygous	17	35	48.5714	0.352941	39	intron
NODE_4763856_length_74288_cov_17.330053 mapping	32567	SNV	1	T	A	Heterozygous	35	62	56.4516	0.2	37.6571	intron
NODE_4763856_length_74288_cov_17.330053 mapping	32587	SNV	1	T	A	Homozygous	33	38	86.8421	0.242424	38.8485	intron
NODE_4763856_length_74288_cov_17.330053 mapping	32604	SNV	1	G	A	Heterozygous	20	26	76.9231	0.2	35.7	intron
NODE_4763856_length_74288_cov_17.330053 mapping	32672	SNV	1	G	T	Homozygous	12	13	92.3077	0.333333	37.0833	intron
NODE_4763856_length_74288_cov_17.330053 mapping	32680	MNV	2	CT	TC	Heterozygous	5	16	31.25	0.2	37	intron
NODE_4763856_length_74288_cov_17.330053 mapping	32681	SNV	1	T	C	Heterozygous	11	16	68.75	0.363636	34.9545	intron
NODE_4763856_length_74288_cov_17.330053 mapping	32708	SNV	1	A	T	Homozygous	16	20	80	0.25	39.1875	intron
NODE_4763856_length_74288_cov_17.330053 mapping	32711	SNV	1	C	A	Heterozygous	15	20	75	0.266667	39	intron
NODE_4763856_length_74288_cov_17.330053 mapping	32711	Replacement	3	C	TGA	Heterozygous	5	20	25	0.4	39.5333	intron
NODE_4763856_length_74288_cov_17.330053 mapping	32714	Insertion	6	-	AAGAAA	Heterozygous	8	20	40	0.25	39.3958	intron
NODE_4763856_length_74288_cov_17.330053 mapping	32714	Insertion	6	-	ATGAAA	Heterozygous	7	20	35	0.285714	39	intron
NODE_4763856_length_74288_cov_17.330053 mapping	32796	SNV	1	C	T	Heterozygous	7	19	36.8421	0.142857	31.7143	intron
NODE_4763856_length_74288_cov_17.330053 mapping	32808	SNV	1	A	G	Heterozygous	6	15	40	0.166667	39.3333	intron
NODE_4763856_length_74288_cov_17.330053 mapping	32816	SNV	1	T	G	Homozygous	19	19	100	0.210526	38.7895	intron
NODE_4763856_length_74288_cov_17.330053 mapping	32821	SNV	1	T	A	Heterozygous	17	22	77.2727	0.235294	38.8235	intron
NODE_4763856_length_74288_cov_17.330053 mapping	32840	SNV	1	A	G	Heterozygous	19	44	43.1818	0.210526	39.1053	intron
NODE_4763856_length_74288_cov_17.330053 mapping	32842	SNV	1	A	G	Heterozygous	19	44	43.1818	0.210526	39.1579	intron
NODE_4763856_length_74288_cov_17.330053 mapping	32849	SNV	1	T	A	Heterozygous	6	52	11.5385	0.333333	39.75	intron
NODE_4763856_length_74288_cov_17.330053 mapping	32849	MNV	2	TA	AG	Heterozygous	10	52	19.2308	0.2	38.45	intron
NODE_4763856_length_74288_cov_17.330053 mapping	32850	SNV	1	A	G	Heterozygous	12	52	23.0769	0.25	36.7917	intron
NODE_4763856_length_74288_cov_17.330053 mapping	32858	SNV	1	G	A	Homozygous	47	58	81.0345	0.382979	35.8936	intron
NODE_4763856_length_74288_cov_17.330053 mapping	32898	SNV	1	A	G	Heterozygous	23	80	28.75	0.347826	38.3478	intron
NODE_4763856_length_74288_cov_17.330053 mapping	32915	Insertion	1	-	G	Heterozygous	24	69	34.7826	0.375	39.75	intron
NODE_4763856_length_74288_cov_17.330053 mapping	32916	Insertion	4	-	CAGT	Heterozygous	21	64	32.8125	0.47619	36.4762	intron
NODE_4763856_length_74288_cov_17.330053 mapping	32916	Insertion	1	-	C	Heterozygous	5	64	7.8125	0.4	39.6538	intron
NODE_4763856_length_74288_cov_17.330053 mapping	32916	SNV	1	A	G	Heterozygous	24	64	37.5	0.291667	34.6949	intron
NODE_4763856_length_74288_cov_17.330053 mapping	32919	Insertion	1	-	T	Heterozygous	30	64	46.875	0.466667	38.3	intron
NODE_4763856_length_74288_cov_17.330053 mapping	32920	SNV	1	G	A	Heterozygous	33	60	55	0.454545	38.2727	intron
NODE_4763856_length_74288_cov_17.330053 mapping	32945	SNV	1	C	G	Homozygous	66	70	94.2857	0.439394	37.8939	intron
NODE_4763856_length_74288_cov_17.330053 mapping	32976	SNV	1	T	A	Homozygous	68	68	100	0.442857	37.9857	intron
NODE_4763856_length_74288_cov_17.330053 mapping	32983	SNV	1	C	G	Homozygous	81	81	100	0.488095	36.6667	intron
NODE_4763856_length_74288_cov_17.330053 mapping	33014	MNV	2	AA	GC	Heterozygous	19	82	23.1707	0.368421	35.9737	intron
NODE_4763856_length_74288_cov_17.330053 mapping	33015	SNV	1	A	C	Heterozygous	63	82	76.8293	0.47619	36.592	intron
NODE_4763856_length_74288_cov_17.330053 mapping	33048	SNV	1	A	C	Homozygous	57	70	81.4286	0.368421	37.3684	intron
NODE_4763856_length_74288_cov_17.330053 mapping	33050	Deletion	2	GC	-	Heterozygous	19	72	26.3889	0.421053	36.2368	intron
NODE_4763856_length_74288_cov_17.330053 mapping	33051	SNV	1	C	T	Heterozygous	53	72	73.6111	0.396226	38.1143	intron
NODE_4763856_length_74288_cov_17.330053 mapping	33069	MNV	2	GA	AG	Homozygous	69	69	100	0.449275	37.0217	intron
NODE_4763856_length_74288_cov_17.330053 mapping	33072	SNV	1	T	G	Homozygous	64	69	92.7536	0.4375	36.875	intron
NODE_4763856_length_74288_cov_17.330053 mapping	33084	MNV	2	AG	GC	Homozygous	66	66	100	0.454545	37.8106	intron
NODE_4763856_length_74288_cov_17.330053 mapping	33104	Deletion	1	A	-	Heterozygous	20	71	28.169	0.4	37.95	intron
NODE_4763856_length_74288_cov_17.330053 mapping	33126	SNV	1	C	T	Heterozygous	16	54	29.6296	0.470588	36.5882	intron
NODE_4763856_length_74288_cov_17.330053 mapping	33129	SNV	1	T	C	Homozygous	50	50	100	0.470588	38.2941	intron
NODE_4763856_length_74288_cov_17.330053 mapping	33131	SNV	1	A	G	Homozygous	45	50	90	0.434783	36.6739	intron
NODE_4763856_length_74288_cov_17.330053 mapping	33136	SNV	1	C	T	Heterozygous	16	54	29.6296	0.375	37.9375	intron
NODE_4763856_length_74288_cov_17.330053 mapping	33161	SNV	1	C	T	Homozygous	31	35	88.5714	0.483871	36.5161	intron
NODE_4763856_length_74288_cov_17.330053 mapping	33178	SNV	1	C	T	Heterozygous	10	38	26.3158	0.5	35.6	intron
NODE_4763856_length_74288_cov_17.330053 mapping	33206	SNV	1	G	A	Heterozygous	13	48	27.0833	0.461538	37.4615	intron
NODE_4763856_length_74288_cov_17.330053 mapping	33209	SNV	1	A	C	Homozygous	44	48	91.6667	0.431818	35.4091	intron
NODE_4763856_length_74288_cov_17.330053 mapping	33213	SNV	1	G	A	Heterozygous	12	53	22.6415	0.416667	35.4167	intron
NODE_4763856_length_74288_cov_17.330053 mapping	33216	SNV	1	T	C	Heterozygous	21	57	36.8421	0.428571	34.1905	intron
NODE_4763856_length_74288_cov_17.330053 mapping	33218	SNV	1	T	C	Homozygous	55	57	96.4912	0.490909	36.8909	intron
NODE_4763856_length_74288_cov_17.330053 mapping	33259	SNV	1	A	G	Homozygous	77	79	97.4684	0.487179	37.2436	intron
NODE_4763856_length_74288_cov_17.330053 mapping	33270	SNV	1	G	A	Heterozygous	38	83	45.7831	0.473684	37.3684	intron
NODE_4763856_length_74288_cov_17.330053 mapping	33295	SNV	1	A	C	Homozygous	56	70	80	0.303571	36.6964	intron
NODE_4763856_length_74288_cov_17.330053 mapping	33307	SNV	1	C	G	Homozygous	68	71	95.7746	0.367647	36.3529	intron
NODE_4763856_length_74288_cov_17.330053 mapping	33338	SNV	1	T	C	Homozygous	44	60	73.3333	0.431818	37.1818	intron
NODE_4763856_length_74288_cov_17.330053 mapping	33341	SNV	1	C	T	Heterozygous	17	61	27.8689	0.352941	34.2941	intron
NODE_4763856_length_74288_cov_17.330053 mapping	33369	SNV	1	T	C	Homozygous	48	57	84.2105	0.375	35.8542	intron
NODE_4763856_length_74288_cov_17.330053 mapping	33378	SNV	1	G	A	Heterozygous	20	53	37.7358	0.45	34.65	intron
NODE_4763856_length_74288_cov_17.330053 mapping	33396	SNV	1	A	G	Heterozygous	27	45	60	0.107143	38.5714	intron
NODE_4763856_length_74288_cov_17.330053 mapping	33411	SNV	1	A	G	Heterozygous	12	41	29.2683	0.416667	36.75	intron
NODE_4763856_length_74288_cov_17.330053 mapping	33442	SNV	1	C	A	Heterozygous	15	61	24.5902	0.133333	37.1333	intron
NODE_4763856_length_74288_cov_17.330053 mapping	33506	SNV	1	T	C	Heterozygous	32	49	65.3061	0.40625	38.7812	intron
NODE_4763856_length_74288_cov_17.330053 mapping	33510	SNV	1	A	G	Homozygous	44	46	95.6522	0.4	37.4889	intron
NODE_4763856_length_74288_cov_17.330053 mapping	33514	SNV	1	A	G	Homozygous	43	45	95.5556	0.409091	37.6364	intron
NODE_4763856_length_74288_cov_17.330053 mapping	33524	SNV	1	T	C	Heterozygous	16	30	53.3333	0.4375	37	intron
NODE_4763856_length_74288_cov_17.330053 mapping	33526	SNV	1	G	A	Heterozygous	14	27	51.8519	0.428571	37.2857	intron
NODE_4763856_length_74288_cov_17.330053 mapping	33537	Insertion	2	-	TC	Heterozygous	8	21	38.0952	0.25	31.5	intron
NODE_4763856_length_74288_cov_17.330053 mapping	33547	SNV	1	C	T	Heterozygous	9	19	47.3684	0.444444	37.2222	intron
NODE_4763856_length_74288_cov_17.330053 mapping	33560	Deletion	1	C	-	Homozygous	8	10	80	0.25	37	intron
NODE_4763856_length_74288_cov_17.330053 mapping	33615	SNV	1	A	T	Heterozygous	5	10	50	0.4	38	intron
NODE_4763856_length_74288_cov_17.330053 mapping	33636	SNV	1	A	C	Homozygous	9	13	69.2308	0.333333	36	intron
NODE_4763856_length_74288_cov_17.330053 mapping	33652	SNV	1	T	G	Homozygous	15	18	83.3333	0.333333	37.8	intron
NODE_4763856_length_74288_cov_17.330053 mapping	33661	SNV	1	A	C	Heterozygous	12	19	63.1579	0.416667	37.9565	intron
NODE_4763856_length_74288_cov_17.330053 mapping	33661	MNV	2	AG	CA	Heterozygous	7	19	36.8421	0.285714	40.4286	intron
NODE_4763856_length_74288_cov_17.330053 mapping	33680	SNV	1	A	G	Homozygous	28	30	93.3333	0.428571	37.1786	intron
NODE_4763856_length_74288_cov_17.330053 mapping	33733	SNV	1	C	T	Homozygous	35	38	92.1053	0.5	36.7778	intron
NODE_4763856_length_74288_cov_17.330053 mapping	33754	SNV	1	T	A	Homozygous	31	32	96.875	0.419355	38.4516	intron
NODE_4763856_length_74288_cov_17.330053 mapping	33757	SNV	1	G	A	Heterozygous	10	32	31.25	0.4	37.3	intron
NODE_4763856_length_74288_cov_17.330053 mapping	33766	SNV	1	G	A	Heterozygous	8	30	26.6667	0.375	38.375	intron
NODE_4763856_length_74288_cov_17.330053 mapping	33806	MNV	2	TG	CA	Homozygous	21	21	100	0.285714	38.9762	intron
NODE_4763856_length_74288_cov_17.330053 mapping	33830	SNV	1	A	G	Homozygous	22	28	78.5714	0.5	37.5455	intron
NODE_4763856_length_74288_cov_17.330053 mapping	33874	SNV	1	T	C	Heterozygous	12	36	33.3333	0.416667	38.913	intron
NODE_4763856_length_74288_cov_17.330053 mapping	33874	MNV	2	TC	CT	Heterozygous	8	36	22.2222	0.25	39.6471	intron
NODE_4763856_length_74288_cov_17.330053 mapping	33897	MNV	2	AT	GG	Homozygous	38	38	100	0.473684	35.48	intron
NODE_4763856_length_74288_cov_17.330053 mapping	33906	SNV	1	T	C	Heterozygous	23	36	63.8889	0.478261	35.6957	intron
NODE_4763856_length_74288_cov_17.330053 mapping	33963	SNV	1	T	C	Heterozygous	6	10	60	0.333333	35	intron
NODE_4763856_length_74288_cov_17.330053 mapping	34150	SNV	1	T	C	Heterozygous	7	17	41.1765	0.142857	35.3571	intron
NODE_4763856_length_74288_cov_17.330053 mapping	34150	MNV	2	TG	CA	Heterozygous	4	17	23.5294	0.25	31.25	intron
NODE_4763856_length_74288_cov_17.330053 mapping	34151	SNV	1	G	A	Heterozygous	5	17	29.4118	0.2	38.3	intron
NODE_4763856_length_74288_cov_17.330053 mapping	34163	SNV	1	G	A	Heterozygous	9	23	39.1304	0.111111	36.1111	intron
NODE_4763856_length_74288_cov_17.330053 mapping	34171	SNV	1	G	T	Heterozygous	7	24	29.1667	0.142857	32.7143	intron
NODE_4763856_length_74288_cov_17.330053 mapping	34203	SNV	1	T	A	Homozygous	27	27	100	0.37037	35.1111	intron
NODE_4763856_length_74288_cov_17.330053 mapping	34210	MNV	2	GA	AG	Heterozygous	9	24	37.5	0.333333	35.1111	intron
NODE_4763856_length_74288_cov_17.330053 mapping	34211	SNV	1	A	G	Heterozygous	15	24	62.5	0.4	36.3103	intron
NODE_4763856_length_74288_cov_17.330053 mapping	34263	SNV	1	T	C	Homozygous	18	22	81.8182	0.388889	34.5	intron
NODE_4763856_length_74288_cov_17.330053 mapping	34299	SNV	1	C	A	Heterozygous	9	15	60	0.444444	39	intron
NODE_4763856_length_74288_cov_17.330053 mapping	34299	SNV	1	C	T	Heterozygous	6	15	40	0.333333	39	intron
NODE_4763856_length_74288_cov_17.330053 mapping	34301	SNV	1	A	C	Heterozygous	8	24	33.3333	0.5	36.375	intron
NODE_4763856_length_74288_cov_17.330053 mapping	34344	SNV	1	T	A	Homozygous	22	22	100	0.318182	36.9545	intron
NODE_4763856_length_74288_cov_17.330053 mapping	34357	SNV	1	T	A	Heterozygous	11	19	57.8947	0.272727	39.0909	intron
NODE_4763856_length_74288_cov_17.330053 mapping	34361	MNV	2	TG	CA	Heterozygous	10	17	58.8235	0.3	39.15	intron
NODE_4763856_length_74288_cov_17.330053 mapping	34362	SNV	1	G	A	Heterozygous	7	17	41.1765	0.142857	37.9286	intron
NODE_4763856_length_74288_cov_17.330053 mapping	34381	SNV	1	T	C	Homozygous	23	24	95.8333	0.26087	37.4783	intron
NODE_4763856_length_74288_cov_17.330053 mapping	34385	SNV	1	C	A	Heterozygous	13	24	54.1667	0.307692	37	intron
NODE_4763856_length_74288_cov_17.330053 mapping	34418	Insertion	2	-	TA	Homozygous	24	24	100	0.458333	37.2917	intron
NODE_4763856_length_74288_cov_17.330053 mapping	34424	SNV	1	T	A	Heterozygous	10	30	33.3333	0.2	38.6	intron
NODE_4763856_length_74288_cov_17.330053 mapping	34430	SNV	1	T	A	Heterozygous	7	30	23.3333	0.285714	35.4286	intron
NODE_4763856_length_74288_cov_17.330053 mapping	34432	SNV	1	T	C	Heterozygous	10	29	34.4828	0.5	38.9	intron
NODE_4763856_length_74288_cov_17.330053 mapping	34449	SNV	1	A	G	Heterozygous	8	34	23.5294	0.25	37.875	intron
NODE_4763856_length_74288_cov_17.330053 mapping	34475	Deletion	1	G	-	Heterozygous	9	27	33.3333	0.444444	38.6667	intron
NODE_4763856_length_74288_cov_17.330053 mapping	34503	SNV	1	G	A	Heterozygous	11	34	32.3529	0.272727	37.2727	intron
NODE_4763856_length_74288_cov_17.330053 mapping	34509	SNV	1	T	A	Homozygous	30	31	96.7742	0.466667	36.7667	intron
NODE_4763856_length_74288_cov_17.330053 mapping	34539	SNV	1	C	T	Homozygous	17	21	80.9524	0.470588	37.4118	intron
NODE_4763856_length_74288_cov_17.330053 mapping	34542	SNV	1	G	A	Homozygous	18	20	90	0.5	38.3889	intron
NODE_4763856_length_74288_cov_17.330053 mapping	34698	SNV	1	C	T	Homozygous	10	11	90.9091	0.1	36.1	intron
NODE_4763856_length_74288_cov_17.330053 mapping	34709	SNV	1	C	T	Homozygous	8	16	50	0.125	35.875	intron
NODE_4763856_length_74288_cov_17.330053 mapping	34739	SNV	1	G	A	Heterozygous	9	24	37.5	0.222222	39.4444	intron
NODE_4763856_length_74288_cov_17.330053 mapping	34756	SNV	1	A	T	Homozygous	20	24	83.3333	0.25	39	intron
NODE_4763856_length_74288_cov_17.330053 mapping	35420	SNV	1	G	C	Heterozygous	4	13	30.7692	0.25	35.5	intron
NODE_4763856_length_74288_cov_17.330053 mapping	35424	SNV	1	G	A	Heterozygous	6	15	40	0.166667	36.1667	intron
NODE_4763856_length_74288_cov_17.330053 mapping	35482	SNV	1	C	T	Homozygous	11	13	84.6154	0.181818	32.5455	intron
NODE_4763856_length_74288_cov_17.330053 mapping	35596	SNV	1	T	C	Heterozygous	9	25	36	0.444444	38.2222	intron
NODE_4763856_length_74288_cov_17.330053 mapping	35603	SNV	1	A	G	Homozygous	26	26	100	0.230769	39.1923	intron
NODE_4763856_length_74288_cov_17.330053 mapping	35613	SNV	1	C	T	Homozygous	25	28	89.2857	0.24	38.28	intron
NODE_4763856_length_74288_cov_17.330053 mapping	35625	SNV	1	C	T	Homozygous	29	32	90.625	0.206897	38.7586	intron
NODE_4763856_length_74288_cov_17.330053 mapping	35672	SNV	1	A	T	Heterozygous	26	56	46.4286	0.346154	38.1923	intron
NODE_4763856_length_74288_cov_17.330053 mapping	35688	SNV	1	T	G	Homozygous	45	45	100	0.2	38.2444	intron
NODE_4763856_length_74288_cov_17.330053 mapping	35743	SNV	1	A	G	Homozygous	20	29	68.9655	0.1	34.55	intron
NODE_4763856_length_74288_cov_17.330053 mapping	35757	SNV	1	A	T	Heterozygous	13	27	48.1481	0.428571	35.7143	intron
NODE_4763856_length_74288_cov_17.330053 mapping	35779	SNV	1	A	G	Homozygous	35	35	100	0.416667	38.6667	intron
NODE_4763856_length_74288_cov_17.330053 mapping	35794	SNV	1	G	A	Heterozygous	12	46	26.087	0.333333	36.8333	intron
NODE_4763856_length_74288_cov_17.330053 mapping	35798	SNV	1	G	A	Heterozygous	16	50	32	0.5	38.375	intron
NODE_4763856_length_74288_cov_17.330053 mapping	35807	SNV	1	C	G	Heterozygous	16	63	25.3968	0.4375	39.0625	intron
NODE_4763856_length_74288_cov_17.330053 mapping	35833	SNV	1	A	C	Homozygous	98	98	100	0.44898	37.8878	intron
NODE_4763856_length_74288_cov_17.330053 mapping	35838	SNV	1	A	T	Heterozygous	37	112	33.0357	0.405405	35.9459	intron
NODE_4763856_length_74288_cov_17.330053 mapping	35869	SNV	1	C	T	Homozygous	80	96	83.3333	0.382716	36.9383	intron
NODE_4763856_length_74288_cov_17.330053 mapping	35876	SNV	1	C	T	Heterozygous	50	93	53.7634	0.3	38.82	intron
NODE_4763856_length_74288_cov_17.330053 mapping	35908	SNV	1	G	T	Heterozygous	16	61	26.2295	0.375	36.6875	intron
NODE_4763856_length_74288_cov_17.330053 mapping	36023	SNV	1	C	G	Homozygous	94	107	87.8505	0.457447	38.234	intron
NODE_4763856_length_74288_cov_17.330053 mapping	36135	SNV	1	A	T	Heterozygous	24	105	22.8571	0.208333	38.1667	intron
NODE_4763856_length_74288_cov_17.330053 mapping	36181	SNV	1	G	C	Heterozygous	47	134	35.0746	0.416667	36.8542	exon
NODE_4763856_length_74288_cov_17.330053 mapping	36197	SNV	1	C	T	Heterozygous	64	157	40.7643	0.446154	36.2	exon
NODE_4763856_length_74288_cov_17.330053 mapping	36317	SNV	1	T	C	Heterozygous	84	126	66.6667	0.452381	36.75	intron
NODE_4763856_length_74288_cov_17.330053 mapping	36317	SNV	1	T	A	Heterozygous	28	126	22.2222	0.464286	38.3214	intron
NODE_4763856_length_74288_cov_17.330053 mapping	36344	SNV	1	A	T	Heterozygous	101	132	76.5152	0.336634	38.2376	intron
NODE_4763856_length_74288_cov_17.330053 mapping	36364	SNV	1	C	T	Homozygous	118	141	83.6879	0.338983	36.7542	intron
NODE_4763856_length_74288_cov_17.330053 mapping	36462	SNV	1	C	A	Heterozygous	54	124	43.5484	0.462963	38.2222	intron
NODE_4763856_length_74288_cov_17.330053 mapping	36581	SNV	1	A	G	Homozygous	55	61	90.1639	0.472727	37.7818	intron
NODE_4763856_length_74288_cov_17.330053 mapping	36596	SNV	1	G	A	Heterozygous	14	50	28	0.428571	39.7143	intron
NODE_4763856_length_74288_cov_17.330053 mapping	36607	MNV	2	AA	TG	Homozygous	49	49	100	0.428571	38.3469	intron
NODE_4763856_length_74288_cov_17.330053 mapping	36639	SNV	1	G	A	Homozygous	68	68	100	0.426471	36.5147	intron
NODE_4763856_length_74288_cov_17.330053 mapping	36657	SNV	1	T	C	Heterozygous	45	107	42.0561	0.422222	38.8427	intron
NODE_4763856_length_74288_cov_17.330053 mapping	36657	MNV	2	TG	CA	Heterozygous	32	107	29.9065	0.34375	39.2812	intron
NODE_4763856_length_74288_cov_17.330053 mapping	36797	SNV	1	G	C	Homozygous	49	68	72.0588	0.469388	37.2653	exon
NODE_4763856_length_74288_cov_17.330053 mapping	36800	SNV	1	C	T	Heterozygous	17	67	25.3731	0.470588	37.9412	exon
NODE_4763856_length_74288_cov_17.330053 mapping	36804	SNV	1	T	C	Heterozygous	48	68	70.5882	0.458333	37.7292	exon
NODE_4763856_length_74288_cov_17.330053 mapping	36855	SNV	1	C	T	Heterozygous	21	79	26.5823	0.333333	37.4762	exon
NODE_4763856_length_74288_cov_17.330053 mapping	36884	SNV	1	C	T	Heterozygous	24	85	28.2353	0.28	38.64	exon
NODE_4763856_length_74288_cov_17.330053 mapping	36892	SNV	1	C	T	Heterozygous	34	85	40	0.205882	38.0294	exon
NODE_4763856_length_74288_cov_17.330053 mapping	36902	SNV	1	A	T	Homozygous	78	78	100	0.269231	37.8333	exon
NODE_4763856_length_74288_cov_17.330053 mapping	36947	SNV	1	C	T	Heterozygous	32	57	56.1404	0.375	37.8125	exon
NODE_4763856_length_74288_cov_17.330053 mapping	36996	SNV	1	A	C	Homozygous	49	50	98	0.428571	38.7143	exon
NODE_4763856_length_74288_cov_17.330053 mapping	37045	SNV	1	A	G	Homozygous	52	57	91.2281	0.45283	37.1698	exon
NODE_4763856_length_74288_cov_17.330053 mapping	37077	SNV	1	T	C	Homozygous	45	46	97.8261	0.444444	36.6667	exon
NODE_4763856_length_74288_cov_17.330053 mapping	37088	SNV	1	G	A	Homozygous	37	45	82.2222	0.459459	34.5676	exon
NODE_4763856_length_74288_cov_17.330053 mapping	37121	SNV	1	T	C	Homozygous	25	26	96.1538	0.44	37.2	intron
NODE_4763856_length_74288_cov_17.330053 mapping	37128	SNV	1	T	G	Homozygous	28	28	100	0.428571	37.25	intron
NODE_4763856_length_74288_cov_17.330053 mapping	37189	SNV	1	G	A	Heterozygous	17	46	36.9565	0.333333	38.3889	intron
NODE_4763856_length_74288_cov_17.330053 mapping	37217	SNV	1	A	G	Heterozygous	11	46	23.913	0.230769	37.3077	exon
NODE_4763856_length_74288_cov_17.330053 mapping	37236	SNV	1	T	C	Homozygous	24	38	63.1579	0.153846	37.6923	exon
NODE_4763856_length_74288_cov_17.330053 mapping	37278	SNV	1	A	C	Homozygous	22	23	95.6522	0.0909091	37.7273	exon
NODE_4763856_length_74288_cov_17.330053 mapping	37939	SNV	1	C	A	Homozygous	18	19	94.7368	0.111111	38.7778	intron
NODE_4763856_length_74288_cov_17.330053 mapping	38016	SNV	1	A	G	Homozygous	46	50	92	0.108696	38.3478	intron
NODE_4763856_length_74288_cov_17.330053 mapping	38037	SNV	1	T	C	Heterozygous	16	61	26.2295	0.0625	36.5625	intron
NODE_4763856_length_74288_cov_17.330053 mapping	38042	SNV	1	G	A	Heterozygous	23	56	41.0714	0.0869565	38.1304	intron
NODE_4763856_length_74288_cov_17.330053 mapping	38048	SNV	1	C	A	Homozygous	55	55	100	0.109091	37.2364	intron
NODE_4763856_length_74288_cov_17.330053 mapping	38065	SNV	1	T	C	Heterozygous	19	64	29.6875	0.315789	38.3158	intron
NODE_4763856_length_74288_cov_17.330053 mapping	38080	SNV	1	A	G	Heterozygous	24	87	27.5862	0.375	38.75	intron
NODE_4763856_length_74288_cov_17.330053 mapping	38125	SNV	1	C	T	Heterozygous	26	103	25.2427	0.5	38.8462	intron
NODE_4763856_length_74288_cov_17.330053 mapping	38152	SNV	1	A	C	Homozygous	63	102	61.7647	0.349206	36.6508	intron
NODE_4763856_length_74288_cov_17.330053 mapping	38184	SNV	1	G	T	Homozygous	74	92	80.4348	0.351351	37.2703	intron
NODE_4763856_length_74288_cov_17.330053 mapping	38230	SNV	1	C	T	Heterozygous	25	99	25.2525	0.48	37.68	intron
NODE_4763856_length_74288_cov_17.330053 mapping	38235	SNV	1	T	A	Heterozygous	23	98	23.4694	0.434783	37.1739	intron
NODE_4763856_length_74288_cov_17.330053 mapping	38237	SNV	1	C	T	Heterozygous	38	96	39.5833	0.447368	37.6053	intron
NODE_4763856_length_74288_cov_17.330053 mapping	38251	SNV	1	A	G	Homozygous	69	92	75	0.428571	36.6143	intron
NODE_4763856_length_74288_cov_17.330053 mapping	38253	SNV	1	T	C	Heterozygous	24	99	24.2424	0.416667	36.4583	intron
NODE_4763856_length_74288_cov_17.330053 mapping	38280	SNV	1	G	A	Heterozygous	34	114	29.8246	0.411765	35.3529	intron
NODE_4763856_length_74288_cov_17.330053 mapping	38285	SNV	1	G	A	Heterozygous	20	115	17.3913	0.4	36.95	intron
NODE_4763856_length_74288_cov_17.330053 mapping	38285	MNV	2	GG	AA	Heterozygous	15	115	13.0435	0.4	38.1	intron
NODE_4763856_length_74288_cov_17.330053 mapping	38286	SNV	1	G	A	Heterozygous	21	115	18.2609	0.238095	35.975	intron
NODE_4763856_length_74288_cov_17.330053 mapping	38289	SNV	1	C	T	Heterozygous	29	116	25	0.275862	36.7241	intron
NODE_4763856_length_74288_cov_17.330053 mapping	38363	SNV	1	G	A	Homozygous	57	64	89.0625	0.105263	37.9474	intron
NODE_4763856_length_74288_cov_17.330053 mapping	38394	SNV	1	G	A	Heterozygous	17	56	30.3571	0.235294	37.8235	intron
NODE_4763856_length_74288_cov_17.330053 mapping	38423	SNV	1	A	G	Heterozygous	31	44	70.4545	0.193548	38.7097	intron
NODE_4763856_length_74288_cov_17.330053 mapping	38448	SNV	1	T	A	Heterozygous	13	33	39.3939	0.230769	37.3846	intron
NODE_4763856_length_74288_cov_17.330053 mapping	38451	SNV	1	G	A	Homozygous	30	30	100	0.133333	38.5	intron
NODE_4763856_length_74288_cov_17.330053 mapping	38453	SNV	1	G	T	Heterozygous	9	30	30	0.111111	38.1111	intron
NODE_4763856_length_74288_cov_17.330053 mapping	38466	SNV	1	C	T	Heterozygous	7	23	30.4348	0.285714	40	intron
NODE_4763856_length_74288_cov_17.330053 mapping	38481	SNV	1	T	G	Homozygous	4	10	40	0.25	38.25	intron
NODE_4763856_length_74288_cov_17.330053 mapping	42742	SNV	1	A	C	Homozygous	10	10	100	0.1	34	intron
NODE_4763856_length_74288_cov_17.330053 mapping	43056	SNV	1	T	C	Heterozygous	5	13	38.4615	0.4	36.8	intron
NODE_4763856_length_74288_cov_17.330053 mapping	43187	SNV	1	G	C	Homozygous	15	20	75	0.133333	38.5333	intron
NODE_4763856_length_74288_cov_17.330053 mapping	43205	SNV	1	G	A	Heterozygous	10	21	47.619	0.2	35.3	intron
NODE_4763856_length_74288_cov_17.330053 mapping	43211	SNV	1	G	T	Homozygous	11	11	100	0.454545	36.0909	intron
NODE_4763856_length_74288_cov_17.330053 mapping	43218	SNV	1	G	A	Heterozygous	4	13	30.7692	0.25	35.25	intron
NODE_4763856_length_74288_cov_17.330053 mapping	43772	SNV	1	C	T	Heterozygous	7	21	33.3333	0.428571	38.5714	exon
NODE_4763856_length_74288_cov_17.330053 mapping	43793	SNV	1	C	T	Heterozygous	8	21	38.0952	0.25	33.625	exon
NODE_4763856_length_74288_cov_17.330053 mapping	43810	SNV	1	G	A	Heterozygous	13	23	56.5217	0.307692	36.5385	exon
NODE_4763856_length_74288_cov_17.330053 mapping	43815	SNV	1	C	T	Heterozygous	8	23	34.7826	0.333333	35.6667	exon
NODE_4763856_length_74288_cov_17.330053 mapping	43821	SNV	1	G	A	Heterozygous	11	24	45.8333	0.166667	37.6667	exon
NODE_4763856_length_74288_cov_17.330053 mapping	43832	SNV	1	A	G	Homozygous	18	20	90	0.166667	38.0556	exon
NODE_4763856_length_74288_cov_17.330053 mapping	43836	SNV	1	C	T	Heterozygous	6	21	28.5714	0.166667	36.1667	exon
NODE_4763856_length_74288_cov_17.330053 mapping	43852	SNV	1	A	G	Heterozygous	6	21	28.5714	0.333333	38	exon
NODE_4763856_length_74288_cov_17.330053 mapping	43859	SNV	1	A	G	Homozygous	14	17	82.3529	0.428571	38.7143	exon
NODE_4763856_length_74288_cov_17.330053 mapping	43865	SNV	1	C	G	Heterozygous	8	20	40	0.25	37.375	exon
NODE_4763856_length_74288_cov_17.330053 mapping	43865	SNV	1	C	T	Heterozygous	8	20	40	0.375	37.25	exon
NODE_4763856_length_74288_cov_17.330053 mapping	43867	SNV	1	C	T	Heterozygous	9	20	45	0.333333	35	exon
NODE_4763856_length_74288_cov_17.330053 mapping	43876	SNV	1	T	A	Homozygous	17	20	85	0.352941	38.1176	exon
NODE_4763856_length_74288_cov_17.330053 mapping	43883	SNV	1	A	G	Heterozygous	8	26	30.7692	0.375	38.625	intron
NODE_4763856_length_74288_cov_17.330053 mapping	43898	MNV	2	GC	AA	Heterozygous	17	28	60.7143	0.235294	39.7059	intron
NODE_4763856_length_74288_cov_17.330053 mapping	43954	SNV	1	A	G	Heterozygous	12	30	40	0.25	36.6667	intron
NODE_4763856_length_74288_cov_17.330053 mapping	44020	SNV	1	T	C	Heterozygous	11	32	34.375	0.181818	38.9091	intron
NODE_4763856_length_74288_cov_17.330053 mapping	44053	SNV	1	T	C	Homozygous	21	32	65.625	0.0952381	39.0476	intron
NODE_4763856_length_74288_cov_17.330053 mapping	44090	SNV	1	G	A	Homozygous	17	17	100	0.235294	39	intron
NODE_4763856_length_74288_cov_17.330053 mapping	44096	SNV	1	G	T	Heterozygous	5	17	29.4118	0.2	39.4	intron
NODE_4763856_length_74288_cov_17.330053 mapping	44234	SNV	1	T	A	Homozygous	6	11	54.5455	0.333333	38	exon
NODE_4763856_length_74288_cov_17.330053 mapping	44241	SNV	1	A	T	Homozygous	6	11	54.5455	0.333333	33.5	exon
NODE_4763856_length_74288_cov_17.330053 mapping	47602	SNV	1	T	G	Homozygous	17	18	94.4444	0.0588235	37.1176	exon
NODE_4763856_length_74288_cov_17.330053 mapping	47607	SNV	1	G	T	Homozygous	6	17	35.2941	0.166667	34.5	exon
NODE_4763856_length_74288_cov_17.330053 mapping	48139	SNV	1	T	C	Heterozygous	5	10	50	0.2	37.8	intron
NODE_4763856_length_74288_cov_17.330053 mapping	48158	Replacement	2	CA	T	Heterozygous	3	10	30	0.333333	40.1667	intron
NODE_4763856_length_74288_cov_17.330053 mapping	48161	SNV	1	A	C	Heterozygous	5	10	50	0.2	40	intron
NODE_4763856_length_74288_cov_17.330053 mapping	48183	SNV	1	A	T	Homozygous	11	11	100	0.25	37.9167	intron
NODE_4763856_length_74288_cov_17.330053 mapping	48186	SNV	1	G	C	Homozygous	11	11	100	0.25	37.5	intron
NODE_4763856_length_74288_cov_17.330053 mapping	48189	SNV	1	G	A	Homozygous	11	11	100	0.25	37.5	intron
NODE_4763856_length_74288_cov_17.330053 mapping	48192	SNV	1	T	C	Heterozygous	7	14	50	0.285714	37.7143	intron
NODE_4763856_length_74288_cov_17.330053 mapping	48204	SNV	1	A	G	Heterozygous	9	14	64.2857	0.333333	39	intron
NODE_4763856_length_74288_cov_17.330053 mapping	48218	SNV	1	T	G	Homozygous	14	14	100	0.3125	39.8125	intron
NODE_4763856_length_74288_cov_17.330053 mapping	48233	SNV	1	A	C	Homozygous	17	19	89.4737	0.333333	39.2222	intron
NODE_4763856_length_74288_cov_17.330053 mapping	48246	SNV	1	A	G	Heterozygous	11	22	50	0.416667	39.5	intron
NODE_4763856_length_74288_cov_17.330053 mapping	48264	SNV	1	A	G	Heterozygous	17	24	70.8333	0.352941	38.0882	intron
NODE_4763856_length_74288_cov_17.330053 mapping	48264	MNV	2	AT	GC	Heterozygous	7	24	29.1667	0.285714	38.9286	intron
NODE_4763856_length_74288_cov_17.330053 mapping	48271	SNV	1	A	G	Heterozygous	5	22	22.7273	0.4	39.2	intron
NODE_4763856_length_74288_cov_17.330053 mapping	48283	SNV	1	C	A	Heterozygous	9	20	45	0.333333	37	intron
NODE_4763856_length_74288_cov_17.330053 mapping	48287	MNV	2	CT	TC	Heterozygous	8	17	47.0588	0.375	39.8125	intron
NODE_4763856_length_74288_cov_17.330053 mapping	48288	SNV	1	T	C	Heterozygous	9	17	52.9412	0.444444	39.1111	intron
NODE_4763856_length_74288_cov_17.330053 mapping	48315	SNV	1	C	T	Homozygous	16	16	100	0.375	37.625	intron
NODE_4763856_length_74288_cov_17.330053 mapping	48317	SNV	1	T	C	Heterozygous	9	17	52.9412	0.333333	37.1111	intron
NODE_4763856_length_74288_cov_17.330053 mapping	48322	SNV	1	T	C	Homozygous	17	19	89.4737	0.411765	35.5294	intron
NODE_4763856_length_74288_cov_17.330053 mapping	48357	Deletion	1	T	-	Homozygous	15	15	100	0.466667	37.4667	intron
NODE_4763856_length_74288_cov_17.330053 mapping	48373	SNV	1	T	G	Homozygous	13	14	92.8571	0.384615	38.5385	intron
NODE_4763856_length_74288_cov_17.330053 mapping	48406	SNV	1	C	T	Heterozygous	5	13	38.4615	0.4	38.6	intron
NODE_4763856_length_74288_cov_17.330053 mapping	48408	SNV	1	G	T	Heterozygous	4	13	30.7692	0.25	35.75	intron
NODE_4763856_length_74288_cov_17.330053 mapping	48424	SNV	1	A	T	Homozygous	11	11	100	0.454545	39.2727	intron
NODE_4763856_length_74288_cov_17.330053 mapping	48429	SNV	1	T	A	Homozygous	11	11	100	0.363636	39.7273	intron
NODE_4763856_length_74288_cov_17.330053 mapping	48435	SNV	1	G	A	Heterozygous	7	13	53.8462	0.142857	38.7143	intron
NODE_4763856_length_74288_cov_17.330053 mapping	48439	SNV	1	G	C	Heterozygous	8	14	57.1429	0.125	37.5	intron
NODE_4763856_length_74288_cov_17.330053 mapping	48480	SNV	1	A	G	Homozygous	18	18	100	0.166667	39	intron
NODE_4763856_length_74288_cov_17.330053 mapping	48501	SNV	1	T	G	Homozygous	17	18	94.4444	0.176471	37.7647	intron
NODE_4763856_length_74288_cov_17.330053 mapping	48503	MNV	2	TA	CG	Homozygous	18	18	100	0.166667	39.3333	intron
NODE_4763856_length_74288_cov_17.330053 mapping	48515	SNV	1	T	C	Homozygous	20	20	100	0.25	39.65	intron
NODE_4763856_length_74288_cov_17.330053 mapping	48519	SNV	1	A	G	Homozygous	13	16	81.25	0.307692	39.3846	intron
NODE_4763856_length_74288_cov_17.330053 mapping	48525	SNV	1	G	A	Homozygous	16	18	88.8889	0.375	38	intron
NODE_4763856_length_74288_cov_17.330053 mapping	48534	SNV	1	T	A	Homozygous	19	19	100	0.368421	37.6842	intron
NODE_4763856_length_74288_cov_17.330053 mapping	48585	SNV	1	T	C	Homozygous	22	23	95.6522	0.478261	37.6957	intron
NODE_4763856_length_74288_cov_17.330053 mapping	48594	SNV	1	G	A	Heterozygous	15	28	53.5714	0.4	36.0667	intron
NODE_4763856_length_74288_cov_17.330053 mapping	48605	SNV	1	T	C	Heterozygous	9	31	29.0323	0.333333	37	intron
NODE_4763856_length_74288_cov_17.330053 mapping	48616	SNV	1	A	C	Heterozygous	10	29	34.4828	0.3	35.7	intron
NODE_4763856_length_74288_cov_17.330053 mapping	48619	SNV	1	A	G	Heterozygous	13	28	46.4286	0.461538	37.8462	intron
NODE_4763856_length_74288_cov_17.330053 mapping	48619	MNV	2	AG	GA	Heterozygous	15	28	53.5714	0.333333	36.2759	intron
NODE_4763856_length_74288_cov_17.330053 mapping	48661	MNV	2	AG	GA	Homozygous	21	21	100	0.380952	38.5	intron
NODE_4763856_length_74288_cov_17.330053 mapping	48689	SNV	1	A	G	Homozygous	17	17	100	0.235294	37.3529	intron
NODE_4763856_length_74288_cov_17.330053 mapping	48698	SNV	1	C	T	Heterozygous	9	13	69.2308	0.111111	39.2222	intron
NODE_4763856_length_74288_cov_17.330053 mapping	48732	SNV	1	T	C	Homozygous	12	12	100	0.153846	38.5385	intron
NODE_4763856_length_74288_cov_17.330053 mapping	48741	SNV	1	A	G	Heterozygous	8	10	80	0.125	34.125	intron
NODE_4763856_length_74288_cov_17.330053 mapping	48741	SNV	1	A	T	Heterozygous	2	10	20	0.333333	37.3333	intron
NODE_4763856_length_74288_cov_17.330053 mapping	48746	SNV	1	T	C	Homozygous	4	11	36.3636	0.25	39	intron
NODE_4763856_length_74288_cov_17.330053 mapping	48751	SNV	1	A	G	Homozygous	5	10	50	0.2	38.4	intron
NODE_4763856_length_74288_cov_17.330053 mapping	48754	SNV	1	T	C	Homozygous	7	10	70	0.142857	36.5714	intron
NODE_4763856_length_74288_cov_17.330053 mapping	48756	SNV	1	G	A	Homozygous	10	10	100	0.1	38.1	intron
NODE_4763856_length_74288_cov_17.330053 mapping	49168	SNV	1	A	T	Homozygous	10	12	83.3333	0.4	35.9	intron
NODE_4763856_length_74288_cov_17.330053 mapping	49174	SNV	1	A	G	Homozygous	8	12	66.6667	0.375	37.125	intron
NODE_4763856_length_74288_cov_17.330053 mapping	49178	Insertion	2	-	GC	Heterozygous	5	11	45.4545	0.4	37.4667	intron
NODE_4763856_length_74288_cov_17.330053 mapping	49178	Replacement	3	T	GCC	Heterozygous	3	11	27.2727	0.333333	26.2222	intron
NODE_4763856_length_74288_cov_17.330053 mapping	49182	SNV	1	T	G	Homozygous	11	11	100	0.454545	35.6364	intron
NODE_4763856_length_74288_cov_17.330053 mapping	49276	Deletion	1	T	-	Heterozygous	4	10	40	0.25	35.75	intron
NODE_4763856_length_74288_cov_17.330053 mapping	49307	SNV	1	A	G	Heterozygous	5	17	29.4118	0.2	39.6	intron
NODE_4763856_length_74288_cov_17.330053 mapping	49322	SNV	1	C	G	Heterozygous	10	16	62.5	0.4	39.5	intron
NODE_4763856_length_74288_cov_17.330053 mapping	49322	SNV	1	C	A	Heterozygous	6	16	37.5	0.166667	38.3333	intron
NODE_4763856_length_74288_cov_17.330053 mapping	49343	SNV	1	C	T	Homozygous	20	20	100	0.25	38.95	intron
NODE_4763856_length_74288_cov_17.330053 mapping	49442	SNV	1	A	C	Homozygous	8	10	80	0.25	36.875	intron
NODE_4763856_length_74288_cov_17.330053 mapping	49450	SNV	1	A	G	Heterozygous	4	10	40	0.25	38.25	intron
NODE_4763856_length_74288_cov_17.330053 mapping	49460	SNV	1	G	A	Homozygous	11	11	100	0.272727	36.0909	intron
NODE_4763856_length_74288_cov_17.330053 mapping	49464	SNV	1	C	T	Heterozygous	11	16	68.75	0.454545	35.95	intron
NODE_4763856_length_74288_cov_17.330053 mapping	49464	MNV	2	CA	TC	Heterozygous	5	16	31.25	0.2	35.2	intron
NODE_4763856_length_74288_cov_17.330053 mapping	49469	SNV	1	G	A	Homozygous	16	16	100	0.4375	37.9375	intron
NODE_4763856_length_74288_cov_17.330053 mapping	49478	SNV	1	A	G	Homozygous	15	18	83.3333	0.466667	39.2	intron
NODE_4763856_length_74288_cov_17.330053 mapping	49492	Deletion	1	T	-	Heterozygous	8	21	38.0952	0.5	38.125	intron
NODE_4763856_length_74288_cov_17.330053 mapping	49536	SNV	1	A	C	Homozygous	21	22	95.4545	0.47619	37.8571	intron
NODE_4763856_length_74288_cov_17.330053 mapping	49570	SNV	1	G	A	Homozygous	13	13	100	0.307692	38.3846	intron
NODE_4763856_length_74288_cov_17.330053 mapping	49682	SNV	1	C	G	Homozygous	12	12	100	0.0833333	38.6667	intron
NODE_4763856_length_74288_cov_17.330053 mapping	49715	SNV	1	T	C	Homozygous	13	13	100	0.0769231	40.5385	intron
NODE_4763856_length_74288_cov_17.330053 mapping	49917	SNV	1	C	A	Homozygous	11	11	100	0.0909091	36.9091	intron
NODE_4763856_length_74288_cov_17.330053 mapping	54246	SNV	1	T	A	Homozygous	19	25	76	0.210526	38.5263	intron
NODE_4763856_length_74288_cov_17.330053 mapping	54259	SNV	1	C	T	Heterozygous	10	32	31.25	0.3	37.55	intron
NODE_4763856_length_74288_cov_17.330053 mapping	54259	MNV	2	CC	TT	Heterozygous	10	32	31.25	0.4	38.05	intron
NODE_4763856_length_74288_cov_17.330053 mapping	54273	SNV	1	T	C	Homozygous	28	28	100	0.464286	37.25	intron
NODE_4763856_length_74288_cov_17.330053 mapping	54345	MNV	2	AG	TA	Homozygous	21	21	100	0.047619	37.1429	intron
NODE_4763856_length_74288_cov_17.330053 mapping	54711	SNV	1	C	T	Heterozygous	8	23	34.7826	0.125	32.25	intron
NODE_4763856_length_74288_cov_17.330053 mapping	54766	SNV	1	T	G	Heterozygous	5	17	29.4118	0.4	33	intron
NODE_4763856_length_74288_cov_17.330053 mapping	54884	SNV	1	C	T	Heterozygous	10	23	43.4783	0.1	35.3	exon
NODE_4763856_length_74288_cov_17.330053 mapping	54899	SNV	1	G	A	Heterozygous	7	23	30.4348	0.428571	37.5714	exon
NODE_4763856_length_74288_cov_17.330053 mapping	55390	SNV	1	C	A	Heterozygous	6	21	28.5714	0.333333	29.5	intron
NODE_4763856_length_74288_cov_17.330053 mapping	55404	SNV	1	A	C	Heterozygous	9	17	52.9412	0.222222	36.8889	intron
NODE_4763856_length_74288_cov_17.330053 mapping	55409	SNV	1	G	A	Homozygous	16	16	100	0.1875	36.9375	intron
NODE_4763856_length_74288_cov_17.330053 mapping	55460	SNV	1	G	A	Heterozygous	11	32	34.375	0.272727	38.6364	intron
NODE_4763856_length_74288_cov_17.330053 mapping	56963	SNV	1	A	T	Homozygous	12	12	100	0.25	38.0833	intron
NODE_4763856_length_74288_cov_17.330053 mapping	56966	SNV	1	T	A	Heterozygous	7	12	58.3333	0.285714	37.2857	intron
NODE_4763856_length_74288_cov_17.330053 mapping	56966	SNV	1	T	C	Heterozygous	5	12	41.6667	0.2	39.2	intron
NODE_4763856_length_74288_cov_17.330053 mapping	56970	SNV	1	T	C	Heterozygous	6	11	54.5455	0.166667	40.3333	intron
NODE_4763856_length_74288_cov_17.330053 mapping	57003	SNV	1	A	T	Homozygous	15	15	100	0.466667	38.2667	intron
NODE_4763856_length_74288_cov_17.330053 mapping	57016	SNV	1	T	C	Heterozygous	9	21	42.8571	0.444444	40.4118	intron
NODE_4763856_length_74288_cov_17.330053 mapping	57016	MNV	2	TA	CG	Heterozygous	12	21	57.1429	0.416667	38.4583	intron
NODE_4763856_length_74288_cov_17.330053 mapping	57054	SNV	1	G	A	Heterozygous	16	37	43.2432	0.375	38.5625	intron
NODE_4763856_length_74288_cov_17.330053 mapping	57058	Insertion	1	-	C	Heterozygous	23	37	62.1622	0.391304	38.6087	intron
NODE_4763856_length_74288_cov_17.330053 mapping	57059	SNV	1	A	C	Heterozygous	11	37	29.7297	0.272727	38	intron
NODE_4763856_length_74288_cov_17.330053 mapping	57063	Insertion	1	-	A	Heterozygous	11	38	28.9474	0.272727	38.7273	intron
NODE_4763856_length_74288_cov_17.330053 mapping	57067	SNV	1	C	A	Heterozygous	12	41	29.2683	0.25	38.4167	intron
NODE_4763856_length_74288_cov_17.330053 mapping	57068	SNV	1	T	A	Heterozygous	16	41	39.0244	0.375	38.125	intron
NODE_4763856_length_74288_cov_17.330053 mapping	57075	SNV	1	A	G	Homozygous	34	40	85	0.382353	38.1765	intron
NODE_4763856_length_74288_cov_17.330053 mapping	57120	SNV	1	A	G	Homozygous	14	17	82.3529	0.428571	37.2143	intron
NODE_4763856_length_74288_cov_17.330053 mapping	57136	SNV	1	C	A	Homozygous	10	10	100	0.4	36.5	intron
NODE_4763856_length_74288_cov_17.330053 mapping	57171	SNV	1	C	A	Homozygous	12	12	100	0.333333	36	intron
NODE_4763856_length_74288_cov_17.330053 mapping	57184	SNV	1	T	C	Homozygous	22	22	100	0.363636	35.7727	intron
NODE_4763856_length_74288_cov_17.330053 mapping	57197	SNV	1	C	G	Heterozygous	15	28	53.5714	0.266667	39.2	intron
NODE_4763856_length_74288_cov_17.330053 mapping	57226	SNV	1	G	C	Heterozygous	19	26	73.0769	0.368421	38.2632	intron
NODE_4763856_length_74288_cov_17.330053 mapping	57226	Deletion	1	G	-	Heterozygous	7	26	26.9231	0.428571	35.8571	intron
NODE_4763856_length_74288_cov_17.330053 mapping	57243	SNV	1	C	A	Homozygous	20	22	90.9091	0.4	39	intron
NODE_4763856_length_74288_cov_17.330053 mapping	57248	SNV	1	T	G	Homozygous	20	20	100	0.3	38.45	intron
NODE_4763856_length_74288_cov_17.330053 mapping	57273	SNV	1	A	G	Heterozygous	9	20	45	0.333333	37.2222	intron
NODE_4763856_length_74288_cov_17.330053 mapping	57305	SNV	1	A	T	Homozygous	12	12	100	0.333333	37.8333	intron
NODE_4763856_length_74288_cov_17.330053 mapping	57310	SNV	1	T	C	Heterozygous	8	14	57.1429	0.375	39.25	intron
NODE_4763856_length_74288_cov_17.330053 mapping	57320	SNV	1	G	A	Homozygous	12	15	80	0.416667	39.4167	intron
NODE_4763856_length_74288_cov_17.330053 mapping	57332	SNV	1	T	C	Heterozygous	7	15	46.6667	0.428571	39.1429	intron
NODE_4763856_length_74288_cov_17.330053 mapping	57350	SNV	1	G	A	Homozygous	12	12	100	0.166667	39	intron
NODE_4763856_length_74288_cov_17.330053 mapping	57368	SNV	1	A	T	Homozygous	8	12	66.6667	0.25	38.875	intron
NODE_4763856_length_74288_cov_17.330053 mapping	57402	SNV	1	G	A	Heterozygous	5	20	25	0.333333	39	intron
NODE_4763856_length_74288_cov_17.330053 mapping	57409	SNV	1	C	G	Homozygous	18	21	85.7143	0.333333	38.4444	intron
NODE_4763856_length_74288_cov_17.330053 mapping	57414	SNV	1	T	A	Heterozygous	14	21	66.6667	0.285714	38	intron
NODE_4763856_length_74288_cov_17.330053 mapping	57426	SNV	1	T	A	Heterozygous	13	22	59.0909	0.384615	36.7692	intron
NODE_4763856_length_74288_cov_17.330053 mapping	57459	SNV	1	A	T	Homozygous	25	26	96.1538	0.48	37.96	intron
NODE_4763856_length_74288_cov_17.330053 mapping	57464	SNV	1	G	A	Homozygous	25	25	100	0.48	38.2	intron
NODE_4763856_length_74288_cov_17.330053 mapping	57472	SNV	1	G	A	Heterozygous	15	22	68.1818	0.466667	39.2	intron
NODE_4763856_length_74288_cov_17.330053 mapping	57475	SNV	1	G	A	Homozygous	17	22	77.2727	0.470588	39.0588	intron
NODE_4763856_length_74288_cov_17.330053 mapping	57498	SNV	1	T	C	Heterozygous	14	20	70	0.466667	37.9333	intron
NODE_4763856_length_74288_cov_17.330053 mapping	57504	Deletion	1	C	-	Homozygous	13	15	86.6667	0.428571	34.7143	intron
NODE_4763856_length_74288_cov_17.330053 mapping	57527	SNV	1	C	T	Heterozygous	7	23	30.4348	0.285714	36.7143	intron
NODE_4763856_length_74288_cov_17.330053 mapping	57534	SNV	1	C	G	Heterozygous	8	26	30.7692	0.375	37.75	intron
NODE_4763856_length_74288_cov_17.330053 mapping	57548	SNV	1	T	G	Homozygous	22	22	100	0.227273	35.8182	intron
NODE_4763856_length_74288_cov_17.330053 mapping	57569	SNV	1	C	G	Homozygous	13	18	72.2222	0.230769	37	intron
NODE_4763856_length_74288_cov_17.330053 mapping	57577	Insertion	1	-	G	Homozygous	9	17	52.9412	0.333333	40.1111	intron
NODE_4763856_length_74288_cov_17.330053 mapping	57665	MNV	2	TT	CC	Homozygous	13	13	100	0.307692	37.2308	intron
NODE_4763856_length_74288_cov_17.330053 mapping	57726	SNV	1	C	T	Heterozygous	4	13	30.7692	0.25	34.5	intron
NODE_4763856_length_74288_cov_17.330053 mapping	57830	SNV	1	T	G	Homozygous	18	18	100	0.444444	35.8333	intron
NODE_4763856_length_74288_cov_17.330053 mapping	57832	SNV	1	A	G	Homozygous	16	18	88.8889	0.375	35.875	intron
NODE_4763856_length_74288_cov_17.330053 mapping	57835	SNV	1	C	G	Heterozygous	10	18	55.5556	0.5	36.4	intron
NODE_4763856_length_74288_cov_17.330053 mapping	57873	SNV	1	T	C	Homozygous	16	20	80	0.3125	37.875	intron
NODE_4763856_length_74288_cov_17.330053 mapping	57876	SNV	1	A	T	Homozygous	19	20	95	0.421053	38.5263	intron
NODE_4763856_length_74288_cov_17.330053 mapping	57881	SNV	1	A	C	Homozygous	17	20	85	0.470588	38.5294	intron
NODE_4763856_length_74288_cov_17.330053 mapping	57888	SNV	1	A	G	Homozygous	18	18	100	0.388889	39.0556	intron
NODE_4763856_length_74288_cov_17.330053 mapping	57907	SNV	1	C	A	Heterozygous	5	17	29.4118	0.4	32.4	intron
NODE_4763856_length_74288_cov_17.330053 mapping	57914	SNV	1	T	G	Heterozygous	9	15	60	0.222222	35.4444	intron
NODE_4763856_length_74288_cov_17.330053 mapping	57918	Insertion	1	-	C	Homozygous	12	13	92.3077	0.25	34.5	intron
NODE_4763856_length_74288_cov_17.330053 mapping	57963	SNV	1	G	A	Homozygous	5	14	35.7143	0.2	32.6	intron
NODE_4763856_length_74288_cov_17.330053 mapping	57976	SNV	1	C	T	Homozygous	13	14	92.8571	0.461538	36.3846	intron
NODE_4763856_length_74288_cov_17.330053 mapping	57991	SNV	1	T	G	Homozygous	14	14	100	0.428571	38.4286	intron
NODE_4763856_length_74288_cov_17.330053 mapping	57994	MNV	2	TT	AG	Homozygous	14	14	100	0.428571	37.1071	intron
NODE_4763856_length_74288_cov_17.330053 mapping	57997	SNV	1	T	C	Homozygous	7	14	50	0.142857	36.8571	intron
NODE_4763856_length_74288_cov_17.330053 mapping	58565	SNV	1	G	A	Heterozygous	5	10	50	0.4	38	intron
NODE_4763856_length_74288_cov_17.330053 mapping	58625	SNV	1	T	G	Homozygous	10	10	100	0.4	35	intron
NODE_4763856_length_74288_cov_17.330053 mapping	59677	SNV	1	G	A	Homozygous	17	17	100	0.176471	35.6471	intron
NODE_4763856_length_74288_cov_17.330053 mapping	59688	SNV	1	T	A	Homozygous	7	21	33.3333	0.428571	37.4286	intron
NODE_4763856_length_74288_cov_17.330053 mapping	59794	SNV	1	A	G	Heterozygous	5	11	45.4545	0.2	36.4	intron
NODE_4763856_length_74288_cov_17.330053 mapping	61081	Deletion	1	A	-	Homozygous	4	12	33.3333	0.25	35.5	intron
NODE_4763856_length_74288_cov_17.330053 mapping	61104	SNV	1	A	G	Heterozygous	4	14	28.5714	0.25	38.75	intron
NODE_4763856_length_74288_cov_17.330053 mapping	61128	Insertion	1	-	A	Heterozygous	4	15	26.6667	0.25	38.75	intron
NODE_4763856_length_74288_cov_17.330053 mapping	61163	SNV	1	C	A	Homozygous	7	10	70	0.142857	33.2857	intron
NODE_4763856_length_74288_cov_17.330053 mapping	61216	SNV	1	T	C	Heterozygous	8	11	72.7273	0.25	32.25	intron
NODE_4763856_length_74288_cov_17.330053 mapping	61222	SNV	1	C	T	Heterozygous	4	13	30.7692	0.25	38	intron
NODE_4763856_length_74288_cov_17.330053 mapping	61230	SNV	1	A	C	Heterozygous	4	14	28.5714	0.25	35.25	intron
NODE_4763856_length_74288_cov_17.330053 mapping	61233	SNV	1	T	C	Homozygous	14	14	100	0.285714	35.8571	intron
NODE_4763856_length_74288_cov_17.330053 mapping	61235	SNV	1	G	A	Heterozygous	11	14	78.5714	0.272727	38	intron
NODE_4763856_length_74288_cov_17.330053 mapping	61265	SNV	1	G	C	Heterozygous	10	25	40	0.2	38.9	intron
NODE_4763856_length_74288_cov_17.330053 mapping	61268	SNV	1	C	T	Heterozygous	11	25	44	0.363636	38.8182	intron
NODE_4763856_length_74288_cov_17.330053 mapping	61270	SNV	1	T	A	Homozygous	25	25	100	0.4	39.2	intron
NODE_4763856_length_74288_cov_17.330053 mapping	61290	SNV	1	T	C	Homozygous	20	23	86.9565	0.45	38.6	intron
NODE_4763856_length_74288_cov_17.330053 mapping	61300	SNV	1	C	T	Heterozygous	7	20	35	0.142857	38.8571	intron
NODE_4763856_length_74288_cov_17.330053 mapping	61803	SNV	1	G	A	Heterozygous	7	13	53.8462	0.428571	38.2857	intron
NODE_4763856_length_74288_cov_17.330053 mapping	61808	SNV	1	C	T	Homozygous	14	14	100	0.428571	36.6429	intron
NODE_4763856_length_74288_cov_17.330053 mapping	61826	SNV	1	G	A	Heterozygous	4	12	33.3333	0.25	39	intron
NODE_4763856_length_74288_cov_17.330053 mapping	61832	Deletion	1	G	-	Homozygous	10	10	100	0.5	37.1	intron
NODE_4763856_length_74288_cov_17.330053 mapping	61834	SNV	1	T	C	Heterozygous	5	10	50	0.4	39.6	intron
NODE_4763856_length_74288_cov_17.330053 mapping	61834	SNV	1	T	A	Heterozygous	4	10	40	0.5	38.75	intron
NODE_4763856_length_74288_cov_17.330053 mapping	61836	SNV	1	G	A	Heterozygous	5	10	50	0.4	38	intron
NODE_4763856_length_74288_cov_17.330053 mapping	61839	SNV	1	G	A	Homozygous	10	10	100	0.5	38.3	intron
NODE_4763856_length_74288_cov_17.330053 mapping	61841	SNV	1	T	C	Homozygous	10	10	100	0.5	37.1	intron
NODE_4763856_length_74288_cov_17.330053 mapping	61845	MNV	3	TGA	CGG	Heterozygous	5	10	50	0.4	38.8667	intron
NODE_4763856_length_74288_cov_17.330053 mapping	61845	MNV	3	TGA	CAG	Heterozygous	5	10	50	0.4	39.4	intron
NODE_4763856_length_74288_cov_17.330053 mapping	61851	SNV	1	T	C	Homozygous	10	10	100	0.5	37.2	intron
NODE_4763856_length_74288_cov_17.330053 mapping	65061	SNV	1	A	G	Homozygous	7	12	58.3333	0.285714	39.2857	intron
NODE_4763856_length_74288_cov_17.330053 mapping	65068	SNV	1	G	A	Homozygous	10	12	83.3333	0.2	38.7	intron
NODE_4763856_length_74288_cov_17.330053 mapping	65085	SNV	1	T	G	Homozygous	17	18	94.4444	0.294118	36.7647	intron
NODE_4763856_length_74288_cov_17.330053 mapping	65097	SNV	1	C	T	Heterozygous	6	18	33.3333	0.333333	34	intron
NODE_4763856_length_74288_cov_17.330053 mapping	65101	SNV	1	A	G	Homozygous	11	18	61.1111	0.454545	37.4545	intron
NODE_4763856_length_74288_cov_17.330053 mapping	65269	SNV	1	A	G	Homozygous	11	12	91.6667	0.0909091	36.6364	exon
NODE_4763856_length_74288_cov_17.330053 mapping	65301	SNV	1	T	G	Homozygous	11	11	100	0.0909091	39.0909	exon
NODE_4763856_length_74288_cov_17.330053 mapping	67747	SNV	1	T	G	Homozygous	11	11	100	0.363636	35.0909	exon
NODE_4763856_length_74288_cov_17.330053 mapping	67801	SNV	1	A	G	Heterozygous	12	30	40	0.333333	38.1667	exon
NODE_4763856_length_74288_cov_17.330053 mapping	67816	SNV	1	A	T	Heterozygous	9	32	28.125	0.111111	38	exon
NODE_4763856_length_74288_cov_17.330053 mapping	67828	SNV	1	C	G	Heterozygous	8	31	25.8065	0.125	38.625	exon
NODE_4763856_length_74288_cov_17.330053 mapping	67835	SNV	1	C	T	Heterozygous	8	27	29.6296	0.5	38.125	exon
NODE_4763856_length_74288_cov_17.330053 mapping	67861	SNV	1	T	A	Heterozygous	6	16	37.5	0.333333	37.6667	exon
NODE_4763856_length_74288_cov_17.330053 mapping	67861	SNV	1	T	C	Heterozygous	5	16	31.25	0.2	37	exon
NODE_4763856_length_74288_cov_17.330053 mapping	67866	SNV	1	A	G	Heterozygous	7	16	43.75	0.428571	33.7143	exon
NODE_4763856_length_74288_cov_17.330053 mapping	67866	MNV	2	AA	GG	Heterozygous	5	16	31.25	0.2	33.5	exon
NODE_4763856_length_74288_cov_17.330053 mapping	67867	SNV	1	A	G	Heterozygous	4	16	25	0.25	39.5	exon
NODE_4763856_length_74288_cov_17.330053 mapping	67876	SNV	1	T	G	Heterozygous	5	17	29.4118	0.4	36.6	intron
NODE_4763856_length_74288_cov_17.330053 mapping	67901	SNV	1	T	C	Heterozygous	4	11	36.3636	0.25	36.75	intron
NODE_4763856_length_74288_cov_17.330053 mapping	67913	SNV	1	C	A	Homozygous	15	15	100	0.4	36.2667	intron
NODE_4763856_length_74288_cov_17.330053 mapping	67915	SNV	1	C	A	Heterozygous	5	17	29.4118	0.4	37.8	intron
NODE_4763856_length_74288_cov_17.330053 mapping	67977	SNV	1	C	A	Heterozygous	9	32	28.125	0.444444	38.8889	exon
NODE_4763856_length_74288_cov_17.330053 mapping	67980	MNV	2	AT	GA	Heterozygous	11	31	35.4839	0.454545	36.0909	exon
NODE_4763856_length_74288_cov_17.330053 mapping	67981	SNV	1	T	A	Heterozygous	12	31	38.7097	0.5	39.2917	exon
NODE_4763856_length_74288_cov_17.330053 mapping	67981	Deletion	1	T	-	Heterozygous	8	31	25.8065	0.25	37.9375	exon
NODE_4763856_length_74288_cov_17.330053 mapping	67984	SNV	1	T	G	Heterozygous	11	31	35.4839	0.454545	36.7273	exon
NODE_4763856_length_74288_cov_17.330053 mapping	68008	SNV	1	A	G	Homozygous	23	24	95.8333	0.26087	38.5217	exon
NODE_4763856_length_74288_cov_17.330053 mapping	68025	SNV	1	G	T	Homozygous	13	14	92.8571	0.384615	37.8462	exon
NODE_4763856_length_74288_cov_17.330053 mapping	68570	SNV	1	C	G	Heterozygous	7	10	70	0.333333	38.2222	intron
NODE_4763856_length_74288_cov_17.330053 mapping	68570	Deletion	1	C	-	Heterozygous	3	10	30	0.333333	37.3333	intron
NODE_4763856_length_74288_cov_17.330053 mapping	68586	SNV	1	A	G	Homozygous	10	12	83.3333	0.333333	38.3333	intron
NODE_4763856_length_74288_cov_17.330053 mapping	68601	SNV	1	G	T	Heterozygous	5	16	31.25	0.333333	39.1667	intron
NODE_4763856_length_74288_cov_17.330053 mapping	68643	SNV	1	T	A	Heterozygous	6	15	40	0.333333	39.5	intron
NODE_4763856_length_74288_cov_17.330053 mapping	68658	SNV	1	T	C	Homozygous	18	18	100	0.277778	36.2222	intron
NODE_4763856_length_74288_cov_17.330053 mapping	68703	SNV	1	T	G	Heterozygous	15	23	65.2174	0.0625	38.5	intron
NODE_4763856_length_74288_cov_17.330053 mapping	68708	SNV	1	C	A	Homozygous	23	24	95.8333	0.333333	37.5	intron
NODE_4763856_length_74288_cov_17.330053 mapping	68764	SNV	1	G	A	Homozygous	12	12	100	0.166667	38.5833	intron
NODE_4763856_length_74288_cov_17.330053 mapping	68770	SNV	1	C	T	Heterozygous	5	12	41.6667	0.2	39.6	intron
NODE_4763856_length_74288_cov_17.330053 mapping	68833	SNV	1	C	T	Heterozygous	4	10	40	0.25	39	intron
NODE_4763856_length_74288_cov_17.330053 mapping	68857	SNV	1	G	A	Homozygous	10	12	83.3333	0.4	38.6	intron
NODE_4763856_length_74288_cov_17.330053 mapping	68868	SNV	1	G	A	Homozygous	8	10	80	0.222222	39.5556	intron
NODE_4763856_length_74288_cov_17.330053 mapping	68881	SNV	1	T	C	Homozygous	7	10	70	0.125	37.375	intron
NODE_4763856_length_74288_cov_17.330053 mapping	71757	SNV	1	A	G	Heterozygous	4	12	33.3333	0.25	36	intron
NODE_4763856_length_74288_cov_17.330053 mapping	71774	SNV	1	A	T	Heterozygous	9	18	50	0.222222	39.3333	intron
NODE_4763856_length_74288_cov_17.330053 mapping	71790	SNV	1	C	A	Heterozygous	11	29	37.931	0.272727	36.3636	intron
NODE_4763856_length_74288_cov_17.330053 mapping	71805	SNV	1	A	G	Heterozygous	14	32	43.75	0.285714	38.7857	intron
NODE_4763856_length_74288_cov_17.330053 mapping	71819	SNV	1	C	A	Homozygous	33	33	100	0.272727	37.2424	intron
NODE_4763856_length_74288_cov_17.330053 mapping	71850	SNV	1	G	A	Heterozygous	8	30	26.6667	0.125	34.375	intron
NODE_4763856_length_74288_cov_17.330053 mapping	71861	SNV	1	G	A	Heterozygous	12	27	44.4444	0.166667	35.5833	intron
NODE_4763856_length_74288_cov_17.330053 mapping	71866	SNV	1	T	A	Heterozygous	6	24	25	0.166667	32.3333	intron
NODE_4763856_length_74288_cov_17.330053 mapping	71883	SNV	1	T	G	Homozygous	11	11	100	0.25	33.6667	intron
NODE_4763856_length_74288_cov_17.330053 mapping	71914	SNV	1	A	G	Heterozygous	6	15	40	0.5	38.3333	intron
NODE_4763856_length_74288_cov_17.330053 mapping	71930	SNV	1	G	T	Heterozygous	8	20	40	0.375	36.75	intron
NODE_4763856_length_74288_cov_17.330053 mapping	71945	SNV	1	A	G	Homozygous	22	22	100	0.454545	36.7273	intron
NODE_4763856_length_74288_cov_17.330053 mapping	71965	SNV	1	T	A	Heterozygous	10	23	43.4783	0.454545	37.9091	intron
NODE_4763856_length_74288_cov_17.330053 mapping	71976	MNV	2	TT	CC	Heterozygous	13	28	46.4286	0.384615	35.4615	intron
NODE_4763856_length_74288_cov_17.330053 mapping	71977	SNV	1	T	C	Heterozygous	5	28	17.8571	0.2	39.1	intron
NODE_4763856_length_74288_cov_17.330053 mapping	72014	SNV	1	G	T	Heterozygous	12	30	40	0.153846	38.5385	intron
NODE_4763856_length_74288_cov_17.330053 mapping	72052	SNV	1	A	T	Heterozygous	21	31	67.7419	0.380952	37.619	intron
NODE_4763856_length_74288_cov_17.330053 mapping	72060	SNV	1	A	T	Heterozygous	8	36	22.2222	0.222222	37.2222	intron
NODE_4763856_length_74288_cov_17.330053 mapping	72062	SNV	1	A	G	Heterozygous	9	37	24.3243	0.444444	36.1111	intron
NODE_4763856_length_74288_cov_17.330053 mapping	72102	SNV	1	C	T	Heterozygous	13	29	44.8276	0.461538	35.4615	intron
NODE_4763856_length_74288_cov_17.330053 mapping	72104	SNV	1	G	A	Heterozygous	14	28	50	0.5	37.9286	exon
NODE_4763856_length_74288_cov_17.330053 mapping	72120	SNV	1	T	G	Homozygous	23	23	100	0.434783	36.5217	exon
NODE_4763856_length_74288_cov_17.330053 mapping	72128	SNV	1	T	G	Heterozygous	7	19	36.8421	0.285714	36.2857	intron
NODE_4763856_length_74288_cov_17.330053 mapping	72223	SNV	1	T	C	Homozygous	4	10	40	0.25	39.5	intron
NODE_4763856_length_74288_cov_17.330053 mapping	72231	SNV	1	C	T	Homozygous	10	10	100	0.1	35.4	intron
NODE_4763856_length_74288_cov_17.330053 mapping	72244	Deletion	1	T	-	Heterozygous	5	11	45.4545	0.2	36.8	intron
NODE_4763856_length_74288_cov_17.330053 mapping	72244	SNV	1	T	G	Heterozygous	3	11	27.2727	0.333333	40	intron
NODE_4763856_length_74288_cov_17.330053 mapping	72253	Insertion	1	-	T	Homozygous	7	11	63.6364	0.285714	38.5714	intron
NODE_4763856_length_74288_cov_17.330053 mapping	72259	Deletion	1	A	-	Homozygous	6	14	42.8571	0.333333	38.8333	intron
NODE_4763856_length_74288_cov_17.330053 mapping	72294	SNV	1	G	A	Heterozygous	8	14	57.1429	0.375	37.125	intron
NODE_4763856_length_74288_cov_17.330053 mapping	72314	SNV	1	A	G	Homozygous	11	11	100	0.272727	38.8182	intron
NODE_4763856_length_74288_cov_17.330053 mapping	73128	SNV	1	T	C	Heterozygous	16	33	48.4848	0.0625	38.5	intron
NODE_4763856_length_74288_cov_17.330053 mapping	73269	SNV	1	G	C	Heterozygous	16	37	43.2432	0.1875	38.375	exon
NODE_4763856_length_74288_cov_17.330053 mapping	73279	SNV	1	T	G	Homozygous	27	29	93.1034	0.296296	37.8148	exon
NODE_4763856_length_74288_cov_17.330053 mapping	73290	SNV	1	A	C	Homozygous	16	20	80	0.125	37.75	exon
NODE_4763856_length_74288_cov_17.330053 mapping	73304	SNV	1	C	T	Heterozygous	9	14	64.2857	0.111111	38.8889	exon
NODE_4763856_length_74288_cov_17.330053 mapping	73395	SNV	1	T	A	Homozygous	24	24	100	0.0833333	34.4583	intron
NODE_4763856_length_74288_cov_17.330053 mapping	73547	SNV	1	C	T	Heterozygous	5	17	29.4118	0.333333	37.1667	exon
NODE_4763856_length_74288_cov_17.330053 mapping	73551	SNV	1	T	G	Homozygous	5	17	29.4118	0.333333	31.6667	exon
NODE_4763856_length_74288_cov_17.330053 mapping	73566	SNV	1	C	T	Homozygous	6	20	30	0.428571	37.1429	exon
NODE_4763856_length_74288_cov_17.330053 mapping	73573	SNV	1	G	A	Homozygous	7	21	33.3333	0.5	33.75	exon
NODE_4763856_length_74288_cov_17.330053 mapping	73624	SNV	1	A	G	Homozygous	20	26	76.9231	0.15	35.55	intron
NODE_4763856_length_74288_cov_17.330053 mapping	73638	SNV	1	C	A	Homozygous	20	20	100	0.2	37.75	intron
NODE_4763856_length_74288_cov_17.330053 mapping	73684	SNV	1	C	T	Homozygous	19	19	100	0.421053	37.3158	exon
NODE_4763856_length_74288_cov_17.330053 mapping	73689	SNV	1	A	G	Homozygous	17	19	89.4737	0.294118	35.9412	exon
NODE_4763856_length_74288_cov_17.330053 mapping	73698	SNV	1	T	G	Homozygous	16	16	100	0.3125	37.875	exon
NODE_4763856_length_74288_cov_17.330053 mapping	73709	SNV	1	A	G	Heterozygous	9	16	56.25	0.111111	38.5556	exon
NODE_4763856_length_74288_cov_17.330053 mapping	73713	Insertion	3	-	GTA	Homozygous	15	15	100	0.266667	38.7556	exon
NODE_4763856_length_74288_cov_17.330053 mapping	74695	SNV	1	G	A	Homozygous	28	55	50.9091	0.0714286	38	intron
NODE_4763856_length_74288_cov_17.330053 mapping	74740	SNV	1	G	A	Heterozygous	20	74	27.027	0.25	38.75	intron
NODE_4763856_length_74288_cov_17.330053 mapping	74803	SNV	1	C	T	Heterozygous	22	89	24.7191	0.409091	36.7727	intron
NODE_4763856_length_74288_cov_17.330053 mapping	74806	SNV	1	C	T	Heterozygous	33	91	36.2637	0.363636	37.6667	intron
NODE_4763856_length_74288_cov_17.330053 mapping	74896	SNV	1	C	A	Heterozygous	21	91	23.0769	0.333333	34.6667	exon
NODE_4763856_length_74288_cov_17.330053 mapping	74914	SNV	1	C	T	Heterozygous	23	83	27.7108	0.478261	37.3043	exon
NODE_4763856_length_74288_cov_17.330053 mapping	74957	MNV	2	GC	TT	Homozygous	69	69	100	0.188406	37.1594	exon
NODE_4763856_length_74288_cov_17.330053 mapping	74961	SNV	1	T	C	Heterozygous	41	72	56.9444	0.219512	38.878	exon
NODE_4763856_length_74288_cov_17.330053 mapping	75033	SNV	1	A	C	Homozygous	53	54	98.1481	0.150943	37.3396	intron
NODE_4763856_length_74288_cov_17.330053 mapping	75039	SNV	1	G	T	Homozygous	40	50	80	0.125	38.5	intron
NODE_4763856_length_74288_cov_17.330053 mapping	75043	SNV	1	A	G	Heterozygous	12	50	24	0.0833333	37.75	intron
NODE_4763856_length_74288_cov_17.330053 mapping	75061	SNV	1	G	A	Heterozygous	20	32	62.5	0.2	38.5	intron
NODE_4763856_length_74288_cov_17.330053 mapping	75071	MNV	2	TT	CA	Homozygous	14	14	100	0.428571	35.3214	intron
NODE_4763856_length_74288_cov_17.330053 mapping	75083	SNV	1	T	C	Homozygous	12	12	100	0.416667	37.4167	intron
NODE_4763856_length_74288_cov_17.330053 mapping	75092	SNV	1	G	T	Homozygous	8	10	80	0.375	37.875	intron
NODE_4763856_length_74288_cov_17.330053 mapping	75130	SNV	1	C	T	Heterozygous	6	17	35.2941	0.5	37.1667	intron
NODE_4763856_length_74288_cov_17.330053 mapping	75138	SNV	1	C	T	Homozygous	15	15	100	0.466667	38.8	intron
NODE_4763856_length_74288_cov_17.330053 mapping	75169	SNV	1	G	C	Homozygous	15	15	100	0.466667	35.7333	exon
NODE_4763856_length_74288_cov_17.330053 mapping	75186	SNV	1	T	C	Heterozygous	12	18	66.6667	0.416667	36.6667	exon
NODE_4763856_length_74288_cov_17.330053 mapping	75200	SNV	1	C	T	Heterozygous	9	13	69.2308	0.333333	36.5556	exon
NODE_4763856_length_74288_cov_17.330053 mapping	75200	SNV	1	C	G	Heterozygous	3	13	23.0769	0.333333	32.6667	exon
NODE_4763856_length_74288_cov_17.330053 mapping	75202	SNV	1	A	C	Homozygous	12	13	92.3077	0.25	38.0833	exon
NODE_4763856_length_74288_cov_17.330053 mapping	75208	SNV	1	C	T	Heterozygous	6	14	42.8571	0.166667	36.6667	exon
NODE_4763856_length_74288_cov_17.330053 mapping	75211	SNV	1	G	A	Heterozygous	6	17	35.2941	0.333333	31.1667	exon
NODE_4763856_length_74288_cov_17.330053 mapping	75800	SNV	1	T	A	Heterozygous	7	10	70	0.428571	37.8571	intergenic
NODE_4763856_length_74288_cov_17.330053 mapping	75807	SNV	1	G	A	Heterozygous	7	10	70	0.428571	35.7143	intergenic
NODE_4767481_length_66669_cov_16.132446 mapping	14817	SNV	1	C	T	Homozygous	10	10	100	0.5	39.3	exon
NODE_4767481_length_66669_cov_16.132446 mapping	14833	SNV	1	A	C	Homozygous	10	10	100	0.5	40	exon
NODE_4767481_length_66669_cov_16.132446 mapping	14837	MNV	2	AT	GG	Homozygous	10	10	100	0.5	39.3	exon
NODE_4767481_length_66669_cov_16.132446 mapping	14842	SNV	1	C	A	Homozygous	10	10	100	0.5	36.3	exon
NODE_4767481_length_66669_cov_16.132446 mapping	20163	MNV	2	CT	TG	Homozygous	11	11	100	0.272727	38.8636	intron
NODE_4767481_length_66669_cov_16.132446 mapping	20170	SNV	1	T	C	Homozygous	12	12	100	0.25	37.9167	intron
NODE_4767481_length_66669_cov_16.132446 mapping	20179	SNV	1	A	T	Homozygous	15	15	100	0.4	37.2667	intron
NODE_4767481_length_66669_cov_16.132446 mapping	20184	SNV	1	G	A	Homozygous	14	14	100	0.357143	37.5714	intron
NODE_4767481_length_66669_cov_16.132446 mapping	20197	SNV	1	C	G	Homozygous	13	13	100	0.357143	38	intron
NODE_4767481_length_66669_cov_16.132446 mapping	20246	SNV	1	T	C	Homozygous	14	14	100	0.5	38.0714	intron
NODE_4767481_length_66669_cov_16.132446 mapping	20428	Deletion	1	A	-	Homozygous	10	10	100	0.3	40.1	intron
NODE_4767481_length_66669_cov_16.132446 mapping	25949	SNV	1	A	G	Homozygous	11	11	100	0.363636	38	intron
NODE_4763499_length_41498_cov_14.869006 mapping	35012	SNV	1	G	T	Heterozygous	2	11	18.1818	0.5	37	intergenic
NODE_4763499_length_41498_cov_14.869006 mapping	35034	SNV	1	T	C	Heterozygous	4	14	28.5714	0.5	35.5	intergenic
NODE_4763499_length_41498_cov_14.869006 mapping	35049	SNV	1	C	G	Homozygous	11	14	78.5714	0.357143	38.2143	intergenic
NODE_4763499_length_41498_cov_14.869006 mapping	35083	SNV	1	A	T	Homozygous	18	22	81.8182	0.363636	37.1818	intergenic
NODE_4763499_length_41498_cov_14.869006 mapping	35085	SNV	1	T	A	Homozygous	22	22	100	0.407407	35.1111	intergenic
NODE_4763499_length_41498_cov_14.869006 mapping	35090	SNV	1	T	C	Homozygous	18	22	81.8182	0.363636	36.9091	intergenic
NODE_4763499_length_41498_cov_14.869006 mapping	35123	MNV	3	GCT	AGA	Heterozygous	3	12	25	0.333333	35.5556	intergenic
NODE_4763499_length_41498_cov_14.869006 mapping	35138	SNV	1	T	C	Heterozygous	3	11	27.2727	0.25	33.75	intergenic
NODE_4763499_length_41498_cov_14.869006 mapping	35243	SNV	1	T	C	Heterozygous	14	22	63.6364	0.142857	37.7143	intergenic
NODE_4777434_length_5030_cov_2.892246 mapping	4425	Deletion	3	ACA	-	Heterozygous	8	10	80	0.5	38.125	intergenic
NODE_4777434_length_5030_cov_2.892246 mapping	4456	MNV	2	TT	CC	Homozygous	10	10	100	0.5	37.8	intergenic
NODE_4775383_length_33904_cov_17.375088 mapping	1421	SNV	1	G	A	Heterozygous	3	11	27.2727	0.333333	31	intergenic
NODE_4775383_length_33904_cov_17.375088 mapping	1654	MNV	2	AC	GT	Homozygous	10	10	100	0.5	35.2	intergenic
NODE_4775383_length_33904_cov_17.375088 mapping	1676	SNV	1	A	C	Homozygous	13	13	100	0.461538	36.6923	intergenic
NODE_4775383_length_33904_cov_17.375088 mapping	1716	SNV	1	C	T	Homozygous	10	10	100	0.5	39.2	intergenic
NODE_4775383_length_33904_cov_17.375088 mapping	1720	SNV	1	G	A	Homozygous	9	10	90	0.444444	38.6667	intergenic
NODE_4775383_length_33904_cov_17.375088 mapping	1737	SNV	1	A	T	Heterozygous	4	12	33.3333	0.25	34.75	intergenic
NODE_4775383_length_33904_cov_17.375088 mapping	1761	SNV	1	T	G	Homozygous	12	12	100	0.416667	35	intergenic
NODE_4775383_length_33904_cov_17.375088 mapping	1803	SNV	1	G	A	Heterozygous	6	12	50	0.166667	36.1667	intergenic
NODE_4775383_length_33904_cov_17.375088 mapping	1808	SNV	1	T	G	Homozygous	10	10	100	0.4	38.3	intergenic
NODE_4775383_length_33904_cov_17.375088 mapping	1810	SNV	1	A	C	Homozygous	9	10	90	0.333333	37	intergenic
NODE_4775383_length_33904_cov_17.375088 mapping	3706	SNV	1	G	A	Homozygous	7	10	70	0.428571	39	intergenic
NODE_4775383_length_33904_cov_17.375088 mapping	3719	SNV	1	G	A	Heterozygous	8	12	66.6667	0.5	35.75	intergenic
NODE_4775383_length_33904_cov_17.375088 mapping	4689	SNV	1	T	C	Homozygous	8	10	80	0.375	38.125	exon
NODE_4775383_length_33904_cov_17.375088 mapping	4692	SNV	1	G	A	Heterozygous	6	10	60	0.333333	37.3333	exon
NODE_4775383_length_33904_cov_17.375088 mapping	4728	SNV	1	C	T	Homozygous	10	10	100	0.2	35.1	exon
NODE_4775383_length_33904_cov_17.375088 mapping	4962	SNV	1	A	T	Homozygous	7	10	70	0.428571	34.8571	intron
NODE_4775383_length_33904_cov_17.375088 mapping	5014	SNV	1	C	G	Homozygous	10	12	83.3333	0.1	35.1	exon
NODE_4775383_length_33904_cov_17.375088 mapping	8100	SNV	1	A	C	Homozygous	6	11	54.5455	0.166667	33	exon
NODE_4775383_length_33904_cov_17.375088 mapping	9977	SNV	1	T	A	Heterozygous	6	13	46.1538	0.333333	34.3636	intergenic
NODE_4775383_length_33904_cov_17.375088 mapping	9977	MNV	2	TA	AT	Heterozygous	7	13	53.8462	0.285714	38.6429	intergenic
NODE_4775383_length_33904_cov_17.375088 mapping	9993	SNV	1	A	C	Homozygous	13	13	100	0.307692	35.6923	intergenic
NODE_4775383_length_33904_cov_17.375088 mapping	10008	SNV	1	A	T	Heterozygous	9	13	69.2308	0.111111	37.4444	intergenic
NODE_4775383_length_33904_cov_17.375088 mapping	10009	SNV	1	C	A	Heterozygous	3	13	23.0769	0.333333	36.3333	intergenic
NODE_4775383_length_33904_cov_17.375088 mapping	10013	SNV	1	C	T	Heterozygous	3	12	25	0.333333	40	intergenic
NODE_4771235_length_56533_cov_14.945537 mapping	57815	SNV	1	A	C	Homozygous	10	10	100	0.1	37.9	intergenic
NODE_4771235_length_56533_cov_14.945537 mapping	57836	SNV	1	T	A	Homozygous	10	10	100	0.1	40.7	intergenic
NODE_4752332_length_48387_cov_11.217021 mapping	35068	SNV	1	C	T	Heterozygous	6	14	42.8571	0.25	37	intergenic
NODE_4752332_length_48387_cov_11.217021 mapping	35110	SNV	1	A	T	Homozygous	22	22	100	0.230769	36.5	intergenic
NODE_4752332_length_48387_cov_11.217021 mapping	35152	SNV	1	A	G	Homozygous	13	14	92.8571	0.285714	37.2857	intergenic
NODE_4752332_length_48387_cov_11.217021 mapping	35321	SNV	1	C	T	Homozygous	14	17	82.3529	0.0666667	39.4	intergenic
NODE_4780481_length_1545_cov_50.281555 mapping	416	SNV	1	G	A	Homozygous	16	17	94.1176	0.0588235	36.5882	intergenic
NODE_4780481_length_1545_cov_50.281555 mapping	448	SNV	1	C	T	Homozygous	12	12	100	0.153846	38.4615	intergenic
NODE_4780481_length_1545_cov_50.281555 mapping	606	SNV	1	G	T	Homozygous	5	12	41.6667	0.4	40.4	intergenic
NODE_4780481_length_1545_cov_50.281555 mapping	616	SNV	1	C	T	Homozygous	5	12	41.6667	0.4	39.4	intergenic
NODE_4780481_length_1545_cov_50.281555 mapping	636	Insertion	1	-	A	Homozygous	5	12	41.6667	0.4	39	intergenic
NODE_4780481_length_1545_cov_50.281555 mapping	1003	SNV	1	A	C	Homozygous	12	12	100	0.0833333	38.4167	intergenic
NODE_4780481_length_1545_cov_50.281555 mapping	1019	Insertion	1	-	T	Heterozygous	4	16	25	0.5	32.5	intergenic
NODE_4780481_length_1545_cov_50.281555 mapping	1042	SNV	1	T	C	Heterozygous	8	23	34.7826	0.111111	39.3333	intergenic
NODE_4780481_length_1545_cov_50.281555 mapping	1049	SNV	1	A	C	Homozygous	23	25	92	0.25	38.4583	intergenic
NODE_4780481_length_1545_cov_50.281555 mapping	1055	SNV	1	T	A	Heterozygous	16	25	64	0.294118	38.8824	intergenic
NODE_4780481_length_1545_cov_50.281555 mapping	1076	SNV	1	A	T	Heterozygous	8	27	29.6296	0.125	39.375	intergenic
NODE_4780481_length_1545_cov_50.281555 mapping	1080	SNV	1	C	T	Heterozygous	7	27	25.9259	0.285714	40.1429	intergenic
NODE_4780481_length_1545_cov_50.281555 mapping	1082	Replacement	2	T	GA	Homozygous	26	26	100	0.230769	39.5962	intergenic
NODE_4780481_length_1545_cov_50.281555 mapping	1091	MNV	2	AC	TT	Homozygous	23	23	100	0.217391	39.4783	intergenic
NODE_4780481_length_1545_cov_50.281555 mapping	1097	SNV	1	T	A	Heterozygous	12	23	52.1739	0.166667	40	intergenic
NODE_4780481_length_1545_cov_50.281555 mapping	1099	SNV	1	G	T	Homozygous	22	22	100	0.227273	39.6364	intergenic
NODE_4780481_length_1545_cov_50.281555 mapping	1103	SNV	1	G	A	Homozygous	18	20	90	0.111111	38.3333	intergenic
NODE_4780481_length_1545_cov_50.281555 mapping	1113	SNV	1	A	T	Heterozygous	5	19	26.3158	0.2	39.4	intergenic
NODE_4780481_length_1545_cov_50.281555 mapping	1125	MNV	2	TT	AC	Homozygous	13	13	100	0.153846	37.32	intergenic
NODE_4780481_length_1545_cov_50.281555 mapping	1221	SNV	1	C	T	Homozygous	21	24	87.5	0.272727	39.4091	intergenic
NODE_4780481_length_1545_cov_50.281555 mapping	1264	SNV	1	A	C	Homozygous	28	28	100	0.206897	39.4138	intergenic
NODE_4780481_length_1545_cov_50.281555 mapping	1285	SNV	1	A	C	Homozygous	9	17	52.9412	0.111111	39	intergenic
NODE_4780481_length_1545_cov_50.281555 mapping	1290	SNV	1	C	A	Homozygous	6	15	40	0.166667	39.5	intergenic
NODE_4780481_length_1545_cov_50.281555 mapping	1300	SNV	1	A	G	Homozygous	4	13	30.7692	0.25	39.25	intergenic
NODE_4764741_length_124690_cov_14.744294 mapping	30405	Deletion	1	A	-	Homozygous	8	11	72.7273	0.375	37.875	intron
NODE_4764741_length_124690_cov_14.744294 mapping	30413	SNV	1	A	T	Homozygous	8	13	61.5385	0.375	37.75	intron
NODE_4764741_length_124690_cov_14.744294 mapping	30416	SNV	1	A	G	Homozygous	13	13	100	0.307692	36.5385	intron
NODE_4764741_length_124690_cov_14.744294 mapping	30433	SNV	1	T	A	Homozygous	10	12	83.3333	0.3	35	intron
NODE_4764741_length_124690_cov_14.744294 mapping	30448	SNV	1	G	A	Homozygous	10	10	100	0.4	32.9	intron
NODE_4764741_length_124690_cov_14.744294 mapping	30465	SNV	1	A	G	Homozygous	9	10	90	0.333333	35.7778	intron
NODE_4764741_length_124690_cov_14.744294 mapping	30592	SNV	1	T	C	Heterozygous	3	10	30	0.333333	36.5	intron
NODE_4764741_length_124690_cov_14.744294 mapping	30592	MNV	2	TG	CT	Heterozygous	7	10	70	0.428571	39.7857	intron
NODE_4764741_length_124690_cov_14.744294 mapping	30596	SNV	1	A	G	Homozygous	10	10	100	0.5	39	intron
NODE_4764741_length_124690_cov_14.744294 mapping	30619	SNV	1	G	A	Homozygous	10	10	100	0.2	39.4	intron
NODE_4764741_length_124690_cov_14.744294 mapping	30624	SNV	1	G	A	Homozygous	13	13	100	0.357143	38.5714	intron
NODE_4764741_length_124690_cov_14.744294 mapping	30628	SNV	1	G	A	Homozygous	9	13	69.2308	0.5	35.8	intron
NODE_4764741_length_124690_cov_14.744294 mapping	30635	SNV	1	T	G	Homozygous	10	13	76.9231	0.4	37.1	intron
NODE_4764741_length_124690_cov_14.744294 mapping	30668	SNV	1	G	C	Heterozygous	4	10	40	0.25	37.75	intron
NODE_4764741_length_124690_cov_14.744294 mapping	30674	SNV	1	C	G	Heterozygous	3	10	30	0.333333	35.6667	intron
NODE_4764741_length_124690_cov_14.744294 mapping	30681	SNV	1	T	C	Homozygous	10	10	100	0.4	37.8	intron
NODE_4764741_length_124690_cov_14.744294 mapping	30780	Replacement	2	GT	A	Heterozygous	3	11	27.2727	0.333333	32.8333	intron
NODE_4764741_length_124690_cov_14.744294 mapping	30791	MNV	2	TT	AA	Heterozygous	4	12	33.3333	0.5	39.125	intron
NODE_4764741_length_124690_cov_14.744294 mapping	30794	SNV	1	A	T	Homozygous	12	12	100	0.416667	39.75	intron
NODE_4764741_length_124690_cov_14.744294 mapping	30810	SNV	1	C	T	Homozygous	12	12	100	0.416667	39.5833	intron
NODE_4764741_length_124690_cov_14.744294 mapping	30821	SNV	1	A	G	Homozygous	12	12	100	0.416667	39.5833	intron
NODE_4764741_length_124690_cov_14.744294 mapping	30831	SNV	1	C	A	Homozygous	12	12	100	0.416667	39.25	intron
NODE_4764741_length_124690_cov_14.744294 mapping	30833	SNV	1	T	A	Heterozygous	8	12	66.6667	0.375	37.625	intron
NODE_4764741_length_124690_cov_14.744294 mapping	30833	SNV	1	T	C	Heterozygous	4	12	33.3333	0.5	40	intron
NODE_4764741_length_124690_cov_14.744294 mapping	30925	Deletion	1	A	-	Heterozygous	7	10	70	0.428571	38.8571	intron
NODE_4764741_length_124690_cov_14.744294 mapping	30955	SNV	1	G	T	Heterozygous	3	11	27.2727	0.333333	39	intron
NODE_4764741_length_124690_cov_14.744294 mapping	30957	SNV	1	T	G	Heterozygous	6	11	54.5455	0.166667	34.5	intron
NODE_4764741_length_124690_cov_14.744294 mapping	30963	Insertion	1	-	T	Heterozygous	3	12	25	0.333333	40.3333	intron
NODE_4764741_length_124690_cov_14.744294 mapping	30969	SNV	1	C	T	Heterozygous	6	10	60	0.5	36	intron
NODE_4764741_length_124690_cov_14.744294 mapping	31197	SNV	1	T	A	Homozygous	11	11	100	0.363636	36.8182	intron
NODE_4764741_length_124690_cov_14.744294 mapping	31208	SNV	1	C	A	Heterozygous	3	10	30	0.333333	39	intron
NODE_4764741_length_124690_cov_14.744294 mapping	31212	SNV	1	G	A	Homozygous	9	12	75	0.444444	33.4444	intron
NODE_4764741_length_124690_cov_14.744294 mapping	31224	SNV	1	G	T	Heterozygous	3	10	30	0.333333	39	intron
NODE_4764741_length_124690_cov_14.744294 mapping	31239	SNV	1	G	A	Heterozygous	5	12	41.6667	0.2	37	intron
NODE_4764741_length_124690_cov_14.744294 mapping	31241	SNV	1	T	C	Homozygous	9	11	81.8182	0.444444	35.5556	intron
NODE_4764741_length_124690_cov_14.744294 mapping	31262	SNV	1	A	C	Heterozygous	4	16	25	0.5	36.25	intron
NODE_4764741_length_124690_cov_14.744294 mapping	31288	SNV	1	C	T	Heterozygous	8	10	80	0.25	26.375	intron
NODE_4764741_length_124690_cov_14.744294 mapping	31398	SNV	1	T	A	Heterozygous	4	10	40	0.5	39.25	intron
NODE_4764741_length_124690_cov_14.744294 mapping	31398	SNV	1	T	C	Heterozygous	3	10	30	0	37.5	intron
NODE_4764741_length_124690_cov_14.744294 mapping	31398	MNV	2	TC	CT	Heterozygous	3	10	30	0.333333	37.6667	intron
NODE_4764741_length_124690_cov_14.744294 mapping	31408	SNV	1	A	G	Homozygous	10	10	100	0.3	39.4	intron
NODE_4764741_length_124690_cov_14.744294 mapping	31422	SNV	1	C	T	Homozygous	11	11	100	0.272727	38.0909	intron
NODE_4764741_length_124690_cov_14.744294 mapping	31424	SNV	1	T	C	Heterozygous	8	11	72.7273	0.25	38	intron
NODE_4764741_length_124690_cov_14.744294 mapping	31431	SNV	1	G	A	Heterozygous	3	11	27.2727	0.333333	41	intron
NODE_4764741_length_124690_cov_14.744294 mapping	31452	Replacement	3	ATG	GT	Heterozygous	3	10	30	0.333333	36.5833	intron
NODE_4764741_length_124690_cov_14.744294 mapping	31453	MNV	3	TGA	CGG	Heterozygous	3	10	30	0.333333	39.9167	intron
NODE_4764741_length_124690_cov_14.744294 mapping	31461	SNV	1	G	T	Homozygous	10	10	100	0.3	38.1	intron
NODE_4764741_length_124690_cov_14.744294 mapping	46258	Deletion	1	G	-	Heterozygous	7	11	63.6364	0.428571	39.7143	intron
NODE_4764741_length_124690_cov_14.744294 mapping	46258	SNV	1	G	T	Heterozygous	4	11	36.3636	0.25	39.5	intron
NODE_4764741_length_124690_cov_14.744294 mapping	46274	SNV	1	T	A	Heterozygous	6	12	50	0.333333	38.3333	intron
NODE_4764741_length_124690_cov_14.744294 mapping	46274	Replacement	4	T	ATAA	Heterozygous	6	12	50	0.333333	39.4583	intron
NODE_4764741_length_124690_cov_14.744294 mapping	46290	SNV	1	C	T	Heterozygous	8	14	57.1429	0.5	38.875	intron
NODE_4764741_length_124690_cov_14.744294 mapping	46290	Deletion	1	C	-	Heterozygous	6	14	42.8571	0.333333	40.3333	intron
NODE_4764741_length_124690_cov_14.744294 mapping	46319	SNV	1	A	G	Heterozygous	4	12	33.3333	0.25	37	intron
NODE_4764741_length_124690_cov_14.744294 mapping	46327	SNV	1	T	A	Homozygous	12	12	100	0.5	37.6667	intron
NODE_4764741_length_124690_cov_14.744294 mapping	46332	SNV	1	T	C	Homozygous	11	11	100	0.454545	38.7273	intron
NODE_4764741_length_124690_cov_14.744294 mapping	46336	SNV	1	T	C	Homozygous	8	10	80	0.375	38.125	intron
NODE_4764741_length_124690_cov_14.744294 mapping	58115	SNV	1	T	C	Homozygous	7	10	70	0.142857	38.8571	intergenic
NODE_4764741_length_124690_cov_14.744294 mapping	58212	SNV	1	C	A	Heterozygous	3	10	30	0.333333	39	intergenic
NODE_4764741_length_124690_cov_14.744294 mapping	58243	SNV	1	C	A	Heterozygous	6	10	60	0.166667	36.6667	intergenic
NODE_4764741_length_124690_cov_14.744294 mapping	58247	SNV	1	C	T	Heterozygous	3	10	30	0.333333	40	intergenic
NODE_4764741_length_124690_cov_14.744294 mapping	58259	SNV	1	C	T	Heterozygous	4	11	36.3636	0.25	39.25	intergenic
NODE_4764741_length_124690_cov_14.744294 mapping	58263	SNV	1	A	T	Heterozygous	4	11	36.3636	0.25	38.5	intergenic
NODE_4764741_length_124690_cov_14.744294 mapping	58263	MNV	2	AT	TC	Heterozygous	7	11	63.6364	0.142857	36.9286	intergenic
NODE_4764741_length_124690_cov_14.744294 mapping	58276	Deletion	1	A	-	Heterozygous	4	11	36.3636	0.25	38	intergenic
NODE_4764741_length_124690_cov_14.744294 mapping	58551	SNV	1	C	T	Homozygous	11	11	100	0.0909091	40.2727	intergenic
NODE_4764741_length_124690_cov_14.744294 mapping	58559	SNV	1	T	C	Homozygous	10	10	100	0.1	38.9	intergenic
NODE_4782623_length_12239_cov_9.803660 mapping	6157	SNV	1	T	G	Homozygous	10	10	100	0.2	39.2	intergenic
NODE_4782623_length_12239_cov_9.803660 mapping	6166	SNV	1	C	A	Homozygous	10	10	100	0.2	39.6	intergenic
NODE_4782623_length_12239_cov_9.803660 mapping	6168	SNV	1	C	T	Homozygous	10	10	100	0.2	40.1	intergenic
NODE_4782623_length_12239_cov_9.803660 mapping	6180	SNV	1	C	T	Homozygous	11	11	100	0.272727	38.9091	intergenic
NODE_4782623_length_12239_cov_9.803660 mapping	6205	SNV	1	C	T	Homozygous	11	11	100	0.272727	40	intergenic
NODE_4782623_length_12239_cov_9.803660 mapping	6214	MNV	2	TT	CA	Homozygous	11	11	100	0.272727	39.4545	intergenic
NODE_4782623_length_12239_cov_9.803660 mapping	6331	SNV	1	G	A	Homozygous	10	10	100	0.4	37.7	exon
NODE_4782623_length_12239_cov_9.803660 mapping	6355	SNV	1	T	A	Homozygous	13	13	100	0.307692	38.8462	exon
NODE_4782623_length_12239_cov_9.803660 mapping	6370	SNV	1	G	A	Homozygous	13	13	100	0.307692	38.7692	exon
NODE_4782623_length_12239_cov_9.803660 mapping	6375	SNV	1	A	C	Homozygous	14	14	100	0.357143	39.3571	exon
NODE_4782623_length_12239_cov_9.803660 mapping	6377	SNV	1	A	T	Homozygous	14	14	100	0.357143	39.1429	exon
NODE_4782623_length_12239_cov_9.803660 mapping	6386	SNV	1	A	G	Homozygous	13	13	100	0.230769	39.6154	exon
NODE_4782623_length_12239_cov_9.803660 mapping	6426	Deletion	1	A	-	Heterozygous	3	10	30	0.333333	40.3333	exon
NODE_4782623_length_12239_cov_9.803660 mapping	7081	SNV	1	T	C	Homozygous	5	10	50	0.4	40.2	intergenic
NODE_4782623_length_12239_cov_9.803660 mapping	7096	SNV	1	A	T	Homozygous	10	10	100	0.4	39.4	intergenic
NODE_4786788_length_15981_cov_4.509730 mapping	8920	SNV	1	A	G	Homozygous	12	12	100	0.0833333	37.3333	intergenic
NODE_4786788_length_15981_cov_4.509730 mapping	8961	SNV	1	A	G	Homozygous	3	14	21.4286	0.333333	38.6667	intergenic
NODE_4786788_length_15981_cov_4.509730 mapping	8967	SNV	1	A	T	Homozygous	5	13	38.4615	0.2	31	intergenic
NODE_4786788_length_15981_cov_4.509730 mapping	8975	SNV	1	C	T	Homozygous	4	13	30.7692	0.25	35.75	intergenic
NODE_4784888_length_37593_cov_16.646690 mapping	6406	SNV	1	A	G	Homozygous	8	10	80	0.125	37.125	intergenic
NODE_4784888_length_37593_cov_16.646690 mapping	6435	Deletion	1	A	-	Heterozygous	7	10	70	0.285714	36.2857	intergenic
NODE_4784888_length_37593_cov_16.646690 mapping	6476	SNV	1	T	A	Homozygous	8	10	80	0.375	38.375	intergenic
NODE_4786781_length_21155_cov_15.422170 mapping	1902	SNV	1	A	G	Heterozygous	5	10	50	0.4	37.6	exon
NODE_4776464_length_87996_cov_13.222851 mapping	4972	Insertion	1	-	T	Heterozygous	2	10	20	0.5	36	intron
NODE_4776464_length_87996_cov_13.222851 mapping	4975	Deletion	1	T	-	Heterozygous	2	10	20	0.5	37.5	intron
NODE_4776464_length_87996_cov_13.222851 mapping	5009	SNV	1	T	C	Heterozygous	2	10	20	0.5	40.75	intron
NODE_4776464_length_87996_cov_13.222851 mapping	5022	SNV	1	T	C	Heterozygous	3	10	30	0.5	38.5	intron
NODE_4776464_length_87996_cov_13.222851 mapping	40578	SNV	1	T	G	Homozygous	10	10	100	0.1	36	intron
NODE_4776464_length_87996_cov_13.222851 mapping	40750	SNV	1	C	T	Heterozygous	9	11	81.8182	0.222222	38	intron
NODE_4776464_length_87996_cov_13.222851 mapping	40756	Replacement	2	T	AA	Heterozygous	9	11	81.8182	0.222222	38.8889	intron
NODE_4776464_length_87996_cov_13.222851 mapping	47211	SNV	1	G	C	Homozygous	10	10	100	0.3	35.8	intron
NODE_4776464_length_87996_cov_13.222851 mapping	47213	SNV	1	T	C	Homozygous	10	10	100	0.3	38.2	intron
NODE_4776464_length_87996_cov_13.222851 mapping	47257	SNV	1	G	A	Homozygous	15	15	100	0.333333	38.8	intron
NODE_4776464_length_87996_cov_13.222851 mapping	47286	SNV	1	A	G	Homozygous	16	16	100	0.4375	39.0625	intron
NODE_4776464_length_87996_cov_13.222851 mapping	47300	SNV	1	C	T	Homozygous	15	15	100	0.4	38.8667	intron
NODE_4776464_length_87996_cov_13.222851 mapping	47325	SNV	1	A	C	Homozygous	11	11	100	0.363636	38.8182	intron
NODE_4776464_length_87996_cov_13.222851 mapping	47341	SNV	1	C	A	Homozygous	12	12	100	0.25	38.25	intron
NODE_4776464_length_87996_cov_13.222851 mapping	47389	SNV	1	C	A	Homozygous	10	10	100	0.4	36.8	intron
NODE_4776464_length_87996_cov_13.222851 mapping	47396	SNV	1	T	G	Homozygous	10	10	100	0.4	33.4	intron
NODE_4776464_length_87996_cov_13.222851 mapping	47453	SNV	1	T	A	Homozygous	10	10	100	0.3	35.6	intron
NODE_4776464_length_87996_cov_13.222851 mapping	47458	Deletion	3	AAA	-	Heterozygous	5	10	50	0.4	35.6	intron
NODE_4776464_length_87996_cov_13.222851 mapping	51118	Deletion	1	G	-	Homozygous	10	10	100	0.4	33.9	intron
NODE_4776464_length_87996_cov_13.222851 mapping	52572	SNV	1	T	C	Homozygous	10	10	100	0.2	38.1	intron
NODE_4776464_length_87996_cov_13.222851 mapping	52592	SNV	1	A	G	Heterozygous	7	13	53.8462	0.142857	38	intron
NODE_4776464_length_87996_cov_13.222851 mapping	52594	SNV	1	C	A	Heterozygous	7	13	53.8462	0.142857	39.1429	intron
NODE_4776464_length_87996_cov_13.222851 mapping	52599	Insertion	1	-	T	Heterozygous	9	14	64.2857	0.111111	36.5	intron
NODE_4776464_length_87996_cov_13.222851 mapping	52599	Insertion	2	-	TT	Heterozygous	5	14	35.7143	0.2	40	intron
NODE_4776464_length_87996_cov_13.222851 mapping	52759	Insertion	1	-	A	Homozygous	13	13	100	0.461538	39.4615	intron
NODE_4776464_length_87996_cov_13.222851 mapping	52779	SNV	1	T	G	Homozygous	18	18	100	0.444444	38.3333	intron
NODE_4776464_length_87996_cov_13.222851 mapping	52796	SNV	1	C	T	Homozygous	17	17	100	0.411765	39.1765	intron
NODE_4776464_length_87996_cov_13.222851 mapping	52802	SNV	1	C	T	Homozygous	16	16	100	0.4375	38.875	intron
NODE_4776464_length_87996_cov_13.222851 mapping	52826	SNV	1	G	T	Homozygous	15	15	100	0.4	37.8	intron
NODE_4776464_length_87996_cov_13.222851 mapping	52851	SNV	1	C	T	Homozygous	12	12	100	0.333333	38.4167	intron
NODE_4776464_length_87996_cov_13.222851 mapping	52857	SNV	1	G	A	Homozygous	12	13	92.3077	0.416667	38.5833	intron
NODE_4776464_length_87996_cov_13.222851 mapping	52861	SNV	1	G	A	Heterozygous	3	13	23.0769	0.333333	38.6667	intron
NODE_4776464_length_87996_cov_13.222851 mapping	52866	SNV	1	T	G	Heterozygous	7	12	58.3333	0.428571	38	intron
NODE_4776464_length_87996_cov_13.222851 mapping	59301	Deletion	1	C	-	Homozygous	9	10	90	0.444444	33.5556	intron
NODE_4776464_length_87996_cov_13.222851 mapping	59457	SNV	1	T	C	Homozygous	10	10	100	0.5	38.3	intron
NODE_4776464_length_87996_cov_13.222851 mapping	59594	SNV	1	A	T	Homozygous	11	11	100	0.454545	40.1818	intron
NODE_4789148_length_34493_cov_18.296640 mapping	16834	SNV	1	A	G	Homozygous	10	10	100	0.4	37.6	intergenic
NODE_4789148_length_34493_cov_18.296640 mapping	16855	SNV	1	A	G	Homozygous	10	10	100	0.4	36.4	intergenic
NODE_4789148_length_34493_cov_18.296640 mapping	16960	SNV	1	T	A	Homozygous	10	10	100	0.4	38.7	intergenic
NODE_4789148_length_34493_cov_18.296640 mapping	17003	MNV	2	AT	TG	Homozygous	10	10	100	0.3	39.6	intergenic
NODE_4789148_length_34493_cov_18.296640 mapping	17023	SNV	1	A	T	Heterozygous	3	10	30	0.333333	39.6667	intergenic
NODE_4789148_length_34493_cov_18.296640 mapping	17978	SNV	1	G	A	Homozygous	10	10	100	0.4	37.7	intergenic
NODE_4789148_length_34493_cov_18.296640 mapping	18585	SNV	1	C	T	Homozygous	10	10	100	0.3	37	intergenic
NODE_4789148_length_34493_cov_18.296640 mapping	18587	SNV	1	C	A	Heterozygous	6	10	60	0.166667	38.1667	intergenic
NODE_4789148_length_34493_cov_18.296640 mapping	18587	SNV	1	C	G	Heterozygous	4	10	40	0.5	37.75	intergenic
NODE_4789148_length_34493_cov_18.296640 mapping	18601	SNV	1	A	T	Homozygous	11	11	100	0.363636	39.9091	intergenic
NODE_4789148_length_34493_cov_18.296640 mapping	18604	SNV	1	A	T	Homozygous	11	11	100	0.363636	39.2727	intergenic
NODE_4789148_length_34493_cov_18.296640 mapping	18620	SNV	1	A	T	Homozygous	11	11	100	0.363636	39.4545	intergenic
NODE_4789148_length_34493_cov_18.296640 mapping	18723	SNV	1	A	T	Homozygous	9	10	90	0.333333	39.3333	intergenic
NODE_4789148_length_34493_cov_18.296640 mapping	18726	SNV	1	T	C	Homozygous	10	10	100	0.3	39.1	intergenic
NODE_4789148_length_34493_cov_18.296640 mapping	18731	SNV	1	C	T	Homozygous	10	10	100	0.3	40.5	intergenic
NODE_4789148_length_34493_cov_18.296640 mapping	18739	SNV	1	C	T	Homozygous	10	10	100	0.3	39.3	intergenic
NODE_4789148_length_34493_cov_18.296640 mapping	18777	SNV	1	C	G	Homozygous	10	10	100	0.3	38.2	intergenic
NODE_4791269_length_50980_cov_10.450353 mapping	23373	SNV	1	C	G	Homozygous	11	11	100	0.363636	38	intron
NODE_4791269_length_50980_cov_10.450353 mapping	23390	SNV	1	C	G	Homozygous	11	11	100	0.363636	37.8182	intron
NODE_4791269_length_50980_cov_10.450353 mapping	23400	SNV	1	A	G	Homozygous	13	13	100	0.461538	38.9231	intron
NODE_4791269_length_50980_cov_10.450353 mapping	23442	SNV	1	T	A	Homozygous	11	11	100	0.461538	36.6923	intron
NODE_4791269_length_50980_cov_10.450353 mapping	23474	SNV	1	T	A	Homozygous	12	12	100	0.285714	37.5714	intron
NODE_4791269_length_50980_cov_10.450353 mapping	23510	SNV	1	C	G	Homozygous	12	12	100	0.5	37.8333	intron
NODE_4791269_length_50980_cov_10.450353 mapping	23513	Deletion	1	T	-	Homozygous	11	12	91.6667	0.454545	35.3636	intron
NODE_4791269_length_50980_cov_10.450353 mapping	23522	SNV	1	A	G	Homozygous	12	12	100	0.416667	36.1667	intron
NODE_4791269_length_50980_cov_10.450353 mapping	23647	Insertion	2	-	AT	Homozygous	11	11	100	0.454545	39.1818	intron
NODE_4791269_length_50980_cov_10.450353 mapping	23657	SNV	1	C	T	Homozygous	11	11	100	0.454545	38.2727	intron
NODE_4791269_length_50980_cov_10.450353 mapping	23669	SNV	1	G	T	Homozygous	10	10	100	0.5	38.9	intron
NODE_4791269_length_50980_cov_10.450353 mapping	23879	SNV	1	C	T	Homozygous	14	14	100	0.357143	37.7143	intron
NODE_4791269_length_50980_cov_10.450353 mapping	23887	MNV	3	TTA	CCG	Homozygous	14	14	100	0.357143	36.4286	intron
NODE_4791269_length_50980_cov_10.450353 mapping	23897	SNV	1	A	C	Homozygous	15	15	100	0.333333	37.1333	intron
NODE_4791269_length_50980_cov_10.450353 mapping	23903	SNV	1	G	A	Homozygous	13	13	100	0.307692	38.6923	intron
NODE_4791269_length_50980_cov_10.450353 mapping	23914	SNV	1	A	T	Homozygous	12	12	100	0.333333	38.4167	intron
NODE_4791269_length_50980_cov_10.450353 mapping	23916	Insertion	1	-	G	Homozygous	11	12	91.6667	0.363636	39.6364	intron
NODE_4791269_length_50980_cov_10.450353 mapping	23925	SNV	1	T	A	Homozygous	11	11	100	0.363636	39	intron
NODE_4791269_length_50980_cov_10.450353 mapping	23931	SNV	1	T	C	Homozygous	11	11	100	0.272727	38.3636	intron
NODE_4791600_length_3118_cov_91.173508 mapping	557	SNV	1	G	C	Homozygous	10	10	100	0.166667	35.5833	intergenic
NODE_4791600_length_3118_cov_91.173508 mapping	589	Deletion	1	A	-	Homozygous	11	11	100	0.363636	36	intergenic
NODE_4791600_length_3118_cov_91.173508 mapping	756	SNV	1	A	T	Homozygous	11	11	100	0.454545	37.9091	intergenic
NODE_4791600_length_3118_cov_91.173508 mapping	775	SNV	1	T	C	Homozygous	11	11	100	0.454545	37.7273	intergenic
NODE_4791600_length_3118_cov_91.173508 mapping	788	SNV	1	G	C	Homozygous	11	11	100	0.454545	35.5455	intergenic
NODE_4791600_length_3118_cov_91.173508 mapping	858	MNV	2	GC	TA	Homozygous	15	15	100	0.4	38.5333	intergenic
NODE_4791600_length_3118_cov_91.173508 mapping	879	SNV	1	T	G	Homozygous	14	14	100	0.428571	38.4286	intergenic
NODE_4791600_length_3118_cov_91.173508 mapping	913	Insertion	1	-	A	Homozygous	11	11	100	0.363636	35.7273	intergenic
NODE_4791600_length_3118_cov_91.173508 mapping	944	SNV	1	G	C	Homozygous	12	12	100	0.416667	38	intergenic
NODE_4791600_length_3118_cov_91.173508 mapping	969	SNV	1	A	G	Homozygous	17	17	100	0.411765	37.5294	intergenic
NODE_4791600_length_3118_cov_91.173508 mapping	974	SNV	1	A	G	Homozygous	17	17	100	0.411765	37.2353	intergenic
NODE_4791600_length_3118_cov_91.173508 mapping	986	Insertion	6	-	TGCCCA	Heterozygous	8	17	47.0588	0.125	38.5208	intergenic
NODE_4791600_length_3118_cov_91.173508 mapping	1003	SNV	1	A	C	Homozygous	14	14	100	0.428571	36.2857	intergenic
NODE_4791600_length_3118_cov_91.173508 mapping	1006	SNV	1	T	C	Heterozygous	6	15	40	0.333333	36.3333	intergenic
NODE_4791600_length_3118_cov_91.173508 mapping	1056	SNV	1	A	G	Homozygous	13	13	100	0.384615	36.7692	intergenic
NODE_4791600_length_3118_cov_91.173508 mapping	1074	SNV	1	T	C	Homozygous	13	13	100	0.384615	37.5385	intergenic
NODE_4791600_length_3118_cov_91.173508 mapping	1086	SNV	1	A	G	Heterozygous	4	10	40	0.5	32.5	intergenic
NODE_4791600_length_3118_cov_91.173508 mapping	1095	SNV	1	C	T	Homozygous	11	11	100	0.454545	33.7273	intergenic
NODE_4791600_length_3118_cov_91.173508 mapping	1108	Insertion	1	-	G	Homozygous	11	13	84.6154	0.363636	36.0909	intergenic
NODE_4791600_length_3118_cov_91.173508 mapping	1118	SNV	1	G	T	Homozygous	12	12	100	0.25	37.1667	intergenic
NODE_4791600_length_3118_cov_91.173508 mapping	1132	SNV	1	G	A	Homozygous	13	13	100	0.307692	36.3077	intergenic
NODE_4791600_length_3118_cov_91.173508 mapping	1137	SNV	1	G	C	Homozygous	13	13	100	0.307692	35.9231	intergenic
NODE_4791600_length_3118_cov_91.173508 mapping	1161	SNV	1	G	C	Homozygous	15	15	100	0.266667	33.2667	intergenic
NODE_4791600_length_3118_cov_91.173508 mapping	1172	MNV	3	TTC	CCT	Homozygous	15	15	100	0.266667	37.5333	intergenic
NODE_4791600_length_3118_cov_91.173508 mapping	1195	MNV	2	AT	CA	Homozygous	12	12	100	0.25	36.7917	intergenic
NODE_4791600_length_3118_cov_91.173508 mapping	1324	SNV	1	A	G	Homozygous	11	11	100	0.363636	36.3636	intergenic
NODE_4790818_length_104595_cov_16.059448 mapping	15489	SNV	1	G	A	Heterozygous	3	10	30	0.4	34.4	intergenic
NODE_4790818_length_104595_cov_16.059448 mapping	15499	SNV	1	C	T	Heterozygous	5	10	50	0.375	38.25	intergenic
NODE_4795355_length_2313_cov_54.216171 mapping	2037	SNV	1	G	A	Homozygous	10	10	100	0.5	34	intergenic
NODE_4779501_length_133367_cov_16.874325 mapping	82988	SNV	1	C	A	Homozygous	3	13	23.0769	0.25	38	intergenic
NODE_4779501_length_133367_cov_16.874325 mapping	83041	SNV	1	T	A	Homozygous	10	10	100	0.428571	32.5714	intergenic
NODE_4796230_length_14012_cov_22.372967 mapping	3937	SNV	1	A	C	Homozygous	20	22	90.9091	0.1	37.9	intergenic
NODE_4796230_length_14012_cov_22.372967 mapping	3975	SNV	1	C	T	Heterozygous	5	12	41.6667	0.4	31	intergenic
NODE_4799542_length_5634_cov_5.917643 mapping	5545	SNV	1	G	T	Homozygous	5	10	50	0.166667	35.8333	intergenic
NODE_4748925_length_162991_cov_12.090514 mapping	163167	SNV	1	T	C	Homozygous	13	14	92.8571	0.0714286	34.2857	intergenic
NODE_4748925_length_162991_cov_12.090514 mapping	163197	SNV	1	C	T	Homozygous	5	11	45.4545	0.166667	34.5	intergenic
NODE_4748925_length_162991_cov_12.090514 mapping	163239	SNV	1	T	C	Homozygous	8	11	72.7273	0.25	35.875	intergenic
NODE_4791781_length_74689_cov_8.979756 mapping	54497	SNV	1	T	A	Homozygous	10	10	100	0.4	39.2	intergenic
NODE_4786649_length_124394_cov_17.949186 mapping	26131	Deletion	1	T	-	Homozygous	9	10	90	0.222222	36	intron
NODE_4786649_length_124394_cov_17.949186 mapping	28362	SNV	1	C	T	Homozygous	10	10	100	0.3	38.5	intron
NODE_4786649_length_124394_cov_17.949186 mapping	71888	SNV	1	T	C	Homozygous	4	13	30.7692	0.25	34.25	exon
NODE_4786649_length_124394_cov_17.949186 mapping	71899	SNV	1	T	C	Homozygous	13	13	100	0.0769231	34.6154	exon
NODE_4786649_length_124394_cov_17.949186 mapping	71912	SNV	1	A	G	Heterozygous	5	16	31.25	0.2	38.8	exon
NODE_4786649_length_124394_cov_17.949186 mapping	71958	SNV	1	A	T	Homozygous	15	15	100	0.133333	37.1333	exon
NODE_4786649_length_124394_cov_17.949186 mapping	72119	SNV	1	A	G	Heterozygous	3	11	27.2727	0.333333	38.6667	intron
NODE_4786649_length_124394_cov_17.949186 mapping	72128	SNV	1	A	T	Heterozygous	3	11	27.2727	0.333333	35.3333	intron
NODE_4786649_length_124394_cov_17.949186 mapping	72132	SNV	1	C	T	Heterozygous	3	11	27.2727	0.333333	39	intron
NODE_4786649_length_124394_cov_17.949186 mapping	72134	SNV	1	A	G	Heterozygous	3	11	27.2727	0.333333	28.6667	intron
NODE_4786649_length_124394_cov_17.949186 mapping	72142	SNV	1	A	C	Heterozygous	7	11	63.6364	0.142857	37.8571	intron
NODE_4786649_length_124394_cov_17.949186 mapping	72144	SNV	1	C	T	Homozygous	11	11	100	0.272727	36.3636	intron
NODE_4786649_length_124394_cov_17.949186 mapping	72147	SNV	1	T	A	Homozygous	11	11	100	0.272727	38.3636	intron
NODE_4786649_length_124394_cov_17.949186 mapping	72165	SNV	1	C	T	Homozygous	11	11	100	0.272727	38.8182	intron
NODE_4786649_length_124394_cov_17.949186 mapping	72180	SNV	1	G	A	Heterozygous	7	10	70	0.142857	39	intron
NODE_4786649_length_124394_cov_17.949186 mapping	72180	SNV	1	G	C	Heterozygous	3	10	30	0.333333	38.6667	intron
NODE_4786649_length_124394_cov_17.949186 mapping	72188	SNV	1	G	A	Heterozygous	3	10	30	0.333333	34	intron
NODE_4786649_length_124394_cov_17.949186 mapping	72906	SNV	1	A	T	Heterozygous	4	11	36.3636	0.5	38	intron
NODE_4786649_length_124394_cov_17.949186 mapping	72908	SNV	1	A	G	Heterozygous	4	11	36.3636	0.5	38	intron
NODE_4786649_length_124394_cov_17.949186 mapping	72942	SNV	1	G	A	Heterozygous	8	16	50	0.375	36.25	exon
NODE_4786649_length_124394_cov_17.949186 mapping	72944	SNV	1	A	G	Heterozygous	3	16	18.75	0.333333	33	exon
NODE_4786649_length_124394_cov_17.949186 mapping	72948	SNV	1	C	T	Heterozygous	5	15	33.3333	0.4	38.4	exon
NODE_4786649_length_124394_cov_17.949186 mapping	72951	SNV	1	A	T	Heterozygous	5	15	33.3333	0.4	38.4	exon
NODE_4786649_length_124394_cov_17.949186 mapping	72955	SNV	1	C	T	Heterozygous	7	13	53.8462	0.428571	39.7143	exon
NODE_4786649_length_124394_cov_17.949186 mapping	72977	SNV	1	T	C	Heterozygous	10	16	62.5	0.4	37.2	exon
NODE_4786649_length_124394_cov_17.949186 mapping	72980	SNV	1	G	A	Heterozygous	10	15	66.6667	0.4	37.2	exon
NODE_4786649_length_124394_cov_17.949186 mapping	72987	SNV	1	G	T	Homozygous	16	16	100	0.4375	37.9375	exon
NODE_4786649_length_124394_cov_17.949186 mapping	72996	MNV	2	GG	AT	Heterozygous	3	17	17.6471	0.333333	39.5	exon
NODE_4786649_length_124394_cov_17.949186 mapping	73009	SNV	1	T	A	Heterozygous	4	17	23.5294	0.5	39.25	exon
NODE_4786649_length_124394_cov_17.949186 mapping	73020	SNV	1	T	C	Heterozygous	8	12	66.6667	0.375	39.125	exon
NODE_4786649_length_124394_cov_17.949186 mapping	73025	SNV	1	G	A	Heterozygous	3	11	27.2727	0.333333	40	intron
NODE_4786649_length_124394_cov_17.949186 mapping	73028	MNV	2	TC	AG	Heterozygous	8	11	72.7273	0.375	38.5625	intron
NODE_4786649_length_124394_cov_17.949186 mapping	73029	SNV	1	C	G	Heterozygous	3	11	27.2727	0.333333	40.6667	intron
NODE_4786649_length_124394_cov_17.949186 mapping	73034	SNV	1	C	T	Heterozygous	8	11	72.7273	0.375	38.625	intron
NODE_4786649_length_124394_cov_17.949186 mapping	73043	SNV	1	T	C	Heterozygous	3	11	27.2727	0.333333	41	intron
NODE_4786649_length_124394_cov_17.949186 mapping	73053	SNV	1	C	G	Heterozygous	3	12	25	0.333333	39	intron
NODE_4786649_length_124394_cov_17.949186 mapping	73062	SNV	1	G	A	Heterozygous	9	14	64.2857	0.333333	36.4444	intron
NODE_4786649_length_124394_cov_17.949186 mapping	73105	SNV	1	G	A	Homozygous	7	11	63.6364	0.428571	38.2857	exon
NODE_4786649_length_124394_cov_17.949186 mapping	73131	SNV	1	G	A	Heterozygous	6	17	35.2941	0.166667	38.5	exon
NODE_4786649_length_124394_cov_17.949186 mapping	73150	SNV	1	T	A	Heterozygous	4	18	22.2222	0.5	35.25	exon
NODE_4786649_length_124394_cov_17.949186 mapping	73153	SNV	1	T	C	Heterozygous	5	18	27.7778	0.4	35.8	exon
NODE_4786649_length_124394_cov_17.949186 mapping	73170	SNV	1	G	A	Heterozygous	8	21	38.0952	0.125	34.5	exon
NODE_4786649_length_124394_cov_17.949186 mapping	73195	SNV	1	G	A	Heterozygous	6	19	31.5789	0.166667	38.5	exon
NODE_4786649_length_124394_cov_17.949186 mapping	73216	SNV	1	G	T	Homozygous	10	16	62.5	0.25	35.9167	exon
NODE_4786649_length_124394_cov_17.949186 mapping	75401	SNV	1	C	T	Homozygous	6	13	46.1538	0.25	36.25	exon
NODE_4786649_length_124394_cov_17.949186 mapping	75406	SNV	1	C	A	Heterozygous	5	14	35.7143	0.285714	35.5714	exon
NODE_4786649_length_124394_cov_17.949186 mapping	75415	Deletion	1	T	-	Heterozygous	3	14	21.4286	0.333333	34.3333	exon
NODE_4786649_length_124394_cov_17.949186 mapping	75457	SNV	1	A	G	Heterozygous	10	14	71.4286	0.1	38.4	exon
NODE_4786649_length_124394_cov_17.949186 mapping	75469	SNV	1	T	C	Heterozygous	9	12	75	0.111111	37.2222	exon
NODE_4786649_length_124394_cov_17.949186 mapping	75473	SNV	1	T	C	Heterozygous	3	12	25	0.333333	38	exon
NODE_4786649_length_124394_cov_17.949186 mapping	75594	SNV	1	G	A	Homozygous	7	12	58.3333	0.142857	34.8571	exon
NODE_4786649_length_124394_cov_17.949186 mapping	77219	SNV	1	A	T	Homozygous	10	10	100	0.3	36.8	intergenic
NODE_4786649_length_124394_cov_17.949186 mapping	77225	SNV	1	A	T	Homozygous	10	12	83.3333	0.4	35.7	intergenic
NODE_4786649_length_124394_cov_17.949186 mapping	77227	SNV	1	T	C	Homozygous	10	12	83.3333	0.4	36.3	intergenic
NODE_4786649_length_124394_cov_17.949186 mapping	77247	SNV	1	A	T	Heterozygous	6	17	35.2941	0.166667	31.5	intergenic
NODE_4786649_length_124394_cov_17.949186 mapping	77251	SNV	1	T	C	Heterozygous	4	17	23.5294	0.25	35.5	intergenic
NODE_4786649_length_124394_cov_17.949186 mapping	77294	SNV	1	G	A	Homozygous	17	17	100	0.294118	38.1765	intergenic
NODE_4786649_length_124394_cov_17.949186 mapping	77310	SNV	1	T	A	Homozygous	9	10	90	0.222222	38.8889	intergenic
NODE_4786649_length_124394_cov_17.949186 mapping	77423	SNV	1	C	T	Homozygous	10	10	100	0.5	37.9	intergenic
NODE_4786649_length_124394_cov_17.949186 mapping	77426	SNV	1	A	C	Heterozygous	2	10	20	0.5	38.75	intergenic
NODE_4786649_length_124394_cov_17.949186 mapping	77426	MNV	2	AA	CG	Heterozygous	8	10	80	0.5	38.875	intergenic
NODE_4786649_length_124394_cov_17.949186 mapping	77606	Deletion	1	T	-	Heterozygous	4	10	40	0.25	39.25	intergenic
NODE_4786649_length_124394_cov_17.949186 mapping	77617	Deletion	1	A	-	Heterozygous	6	10	60	0.333333	39.5	intergenic
NODE_4786649_length_124394_cov_17.949186 mapping	77624	SNV	1	A	T	Homozygous	11	11	100	0.454545	39.5455	intergenic
NODE_4786649_length_124394_cov_17.949186 mapping	77630	SNV	1	T	G	Heterozygous	3	12	25	0.333333	39.3333	intergenic
NODE_4786649_length_124394_cov_17.949186 mapping	77631	SNV	1	A	G	Heterozygous	8	12	66.6667	0.375	38.125	intergenic
NODE_4786649_length_124394_cov_17.949186 mapping	77685	SNV	1	G	A	Homozygous	11	11	100	0.307692	37.7692	intergenic
NODE_4786649_length_124394_cov_17.949186 mapping	77690	Deletion	1	A	-	Heterozygous	8	11	72.7273	0.3	38.2	intergenic
NODE_4786649_length_124394_cov_17.949186 mapping	77692	SNV	1	A	G	Heterozygous	8	11	72.7273	0.3	38.8	intergenic
NODE_4786649_length_124394_cov_17.949186 mapping	77706	SNV	1	C	A	Heterozygous	6	17	35.2941	0.333333	37.6667	intergenic
NODE_4786649_length_124394_cov_17.949186 mapping	77713	SNV	1	A	G	Heterozygous	7	17	41.1765	0.428571	39.8571	intergenic
NODE_4786649_length_124394_cov_17.949186 mapping	77716	SNV	1	C	G	Homozygous	16	16	100	0.3125	39.875	intergenic
NODE_4786649_length_124394_cov_17.949186 mapping	77733	SNV	1	C	T	Heterozygous	10	22	45.4545	0.3	39.6	intergenic
NODE_4786649_length_124394_cov_17.949186 mapping	77740	SNV	1	G	A	Homozygous	20	21	95.2381	0.2	39.45	intergenic
NODE_4786649_length_124394_cov_17.949186 mapping	77742	SNV	1	C	A	Homozygous	19	21	90.4762	0.210526	39.4737	intergenic
NODE_4786649_length_124394_cov_17.949186 mapping	77744	SNV	1	T	G	Homozygous	21	21	100	0.238095	40.0952	intergenic
NODE_4786649_length_124394_cov_17.949186 mapping	77748	SNV	1	T	G	Heterozygous	12	24	50	0.0833333	38.3333	intergenic
NODE_4786649_length_124394_cov_17.949186 mapping	77755	SNV	1	G	T	Heterozygous	12	25	48	0.25	39.5833	intergenic
NODE_4786649_length_124394_cov_17.949186 mapping	77772	SNV	1	T	G	Heterozygous	14	27	51.8519	0.285714	38.4286	intergenic
NODE_4786649_length_124394_cov_17.949186 mapping	77783	SNV	1	A	C	Homozygous	22	22	100	0.136364	38.5909	intergenic
NODE_4786649_length_124394_cov_17.949186 mapping	77791	SNV	1	T	G	Heterozygous	11	23	47.8261	0.181818	40.1818	intergenic
NODE_4786649_length_124394_cov_17.949186 mapping	77802	SNV	1	C	T	Homozygous	11	17	64.7059	0.181818	39.5455	intergenic
NODE_4786649_length_124394_cov_17.949186 mapping	77818	MNV	2	TC	AT	Homozygous	16	16	100	0.25	36.875	intergenic
NODE_4786649_length_124394_cov_17.949186 mapping	77825	SNV	1	T	A	Heterozygous	5	17	29.4118	0.2	35.2	intergenic
NODE_4786649_length_124394_cov_17.949186 mapping	77832	Replacement	4	TGTT	CA	Heterozygous	10	13	76.9231	0.4	35.525	intergenic
NODE_4786649_length_124394_cov_17.949186 mapping	77833	Deletion	2	GT	-	Heterozygous	3	13	23.0769	0.333333	38.5	intergenic
NODE_4786649_length_124394_cov_17.949186 mapping	77862	SNV	1	G	A	Homozygous	12	12	100	0.5	38.75	intergenic
NODE_4786649_length_124394_cov_17.949186 mapping	77866	Deletion	1	G	-	Heterozygous	5	10	50	0.4	38	intergenic
NODE_4786649_length_124394_cov_17.949186 mapping	77866	SNV	1	G	A	Heterozygous	5	10	50	0.2	40	intergenic
NODE_4786649_length_124394_cov_17.949186 mapping	77873	SNV	1	G	T	Heterozygous	6	11	54.5455	0.5	38.1667	intergenic
NODE_4786649_length_124394_cov_17.949186 mapping	77882	SNV	1	T	C	Heterozygous	8	16	50	0.375	38.75	intergenic
NODE_4786649_length_124394_cov_17.949186 mapping	77900	SNV	1	T	A	Heterozygous	8	21	38.0952	0.5	39.375	intergenic
NODE_4786649_length_124394_cov_17.949186 mapping	77904	Insertion	1	-	T	Heterozygous	11	21	52.381	0.363636	39.6364	intergenic
NODE_4786649_length_124394_cov_17.949186 mapping	77905	Insertion	1	-	C	Heterozygous	8	22	36.3636	0.5	38.25	intergenic
NODE_4786649_length_124394_cov_17.949186 mapping	77911	SNV	1	T	A	Heterozygous	13	25	52	0.384615	37.8462	intergenic
NODE_4786649_length_124394_cov_17.949186 mapping	77920	SNV	1	A	T	Heterozygous	15	26	57.6923	0.4	38.2414	intergenic
NODE_4786649_length_124394_cov_17.949186 mapping	77920	MNV	2	AA	TG	Heterozygous	11	26	42.3077	0.454545	39.8182	intergenic
NODE_4786649_length_124394_cov_17.949186 mapping	77926	SNV	1	T	C	Heterozygous	13	26	50	0.307692	39.1538	intergenic
NODE_4786649_length_124394_cov_17.949186 mapping	77929	Replacement	3	ATG	CT	Heterozygous	11	30	36.6667	0.454545	38.9697	intergenic
NODE_4786649_length_124394_cov_17.949186 mapping	77930	SNV	1	T	A	Heterozygous	19	30	63.3333	0.315789	38.4314	intergenic
NODE_4786649_length_124394_cov_17.949186 mapping	77936	SNV	1	T	A	Heterozygous	20	31	64.5161	0.3	38.4	intergenic
NODE_4786649_length_124394_cov_17.949186 mapping	77936	MNV	2	TT	AC	Heterozygous	11	31	35.4839	0.454545	37.7273	intergenic
NODE_4786649_length_124394_cov_17.949186 mapping	77941	SNV	1	A	G	Heterozygous	6	32	18.75	0.333333	37.8333	intergenic
NODE_4786649_length_124394_cov_17.949186 mapping	77948	SNV	1	A	T	Heterozygous	7	33	21.2121	0.285714	38	intergenic
NODE_4786649_length_124394_cov_17.949186 mapping	77960	SNV	1	T	C	Homozygous	34	34	100	0.441176	38.4412	intergenic
NODE_4786649_length_124394_cov_17.949186 mapping	77967	SNV	1	T	A	Heterozygous	14	37	37.8378	0.428571	38.4286	intergenic
NODE_4786649_length_124394_cov_17.949186 mapping	77974	MNV	2	TG	AA	Homozygous	31	31	100	0.451613	39.0968	intergenic
NODE_4786649_length_124394_cov_17.949186 mapping	77978	SNV	1	G	A	Heterozygous	20	31	64.5161	0.35	38.15	intergenic
NODE_4786649_length_124394_cov_17.949186 mapping	77994	SNV	1	T	C	Heterozygous	23	33	69.697	0.391304	37.6957	intergenic
NODE_4786649_length_124394_cov_17.949186 mapping	78014	SNV	1	C	A	Heterozygous	6	25	24	0.333333	35.1667	intergenic
NODE_4786649_length_124394_cov_17.949186 mapping	78015	Insertion	1	-	A	Heterozygous	6	24	25	0.333333	36.8333	intergenic
NODE_4786649_length_124394_cov_17.949186 mapping	78018	MNV	2	TG	CT	Heterozygous	6	24	25	0.333333	35.4444	intergenic
NODE_4786649_length_124394_cov_17.949186 mapping	78019	Replacement	2	G	CT	Heterozygous	18	24	75	0.5	37.4259	intergenic
NODE_4786649_length_124394_cov_17.949186 mapping	78062	SNV	1	T	C	Homozygous	8	10	80	0.375	36.125	intergenic
NODE_4786649_length_124394_cov_17.949186 mapping	78067	SNV	1	A	G	Heterozygous	4	10	40	0.5	35	intergenic
NODE_4786649_length_124394_cov_17.949186 mapping	78078	SNV	1	T	C	Homozygous	6	10	60	0.333333	37	intergenic
NODE_4786418_length_159756_cov_19.780233 mapping	26279	SNV	1	A	G	Heterozygous	4	11	36.3636	0.25	36	intergenic
NODE_4786418_length_159756_cov_19.780233 mapping	26288	SNV	1	G	T	Homozygous	13	13	100	0.230769	38.4615	intergenic
NODE_4786418_length_159756_cov_19.780233 mapping	26294	SNV	1	G	A	Homozygous	14	14	100	0.214286	38.7143	intergenic
NODE_4786418_length_159756_cov_19.780233 mapping	26319	Deletion	1	A	-	Heterozygous	8	16	50	0.25	40.375	intergenic
NODE_4786418_length_159756_cov_19.780233 mapping	26358	MNV	2	CA	TG	Homozygous	14	14	100	0.285714	39.3929	intergenic
NODE_4786418_length_159756_cov_19.780233 mapping	26366	SNV	1	T	C	Homozygous	15	15	100	0.333333	36.2	intergenic
NODE_4786418_length_159756_cov_19.780233 mapping	26412	SNV	1	T	A	Homozygous	11	11	100	0.363636	35.6364	intergenic
NODE_4786418_length_159756_cov_19.780233 mapping	26422	MNV	2	AT	CA	Homozygous	12	12	100	0.25	36.4167	intergenic
NODE_4786418_length_159756_cov_19.780233 mapping	26446	Deletion	1	C	-	Homozygous	14	14	100	0.0714286	37.7143	intergenic
NODE_4786418_length_159756_cov_19.780233 mapping	26457	MNV	2	GA	AG	Homozygous	14	14	100	0.0714286	38.1786	intergenic
NODE_4786418_length_159756_cov_19.780233 mapping	26483	SNV	1	T	A	Homozygous	14	14	100	0.0714286	39.7143	intergenic
NODE_4786418_length_159756_cov_19.780233 mapping	26491	MNV	2	CA	AT	Homozygous	15	15	100	0.0666667	37.9667	intergenic
NODE_4786418_length_159756_cov_19.780233 mapping	28344	Insertion	2	-	CT	Homozygous	10	10	100	0.4	39.25	intergenic
NODE_4786418_length_159756_cov_19.780233 mapping	28512	SNV	1	C	T	Homozygous	10	10	100	0.4	37.9	intergenic
NODE_4786418_length_159756_cov_19.780233 mapping	28518	SNV	1	T	C	Homozygous	11	11	100	0.454545	38.1818	intergenic
NODE_4786418_length_159756_cov_19.780233 mapping	29384	Deletion	1	T	-	Homozygous	10	10	100	0.5	38.6	intergenic
NODE_4786418_length_159756_cov_19.780233 mapping	29389	SNV	1	T	C	Homozygous	11	11	100	0.454545	38.5455	intergenic
NODE_4786418_length_159756_cov_19.780233 mapping	29425	SNV	1	A	G	Homozygous	10	10	100	0.4	39.7	intergenic
NODE_4786418_length_159756_cov_19.780233 mapping	32447	SNV	1	A	T	Homozygous	10	10	100	0.1	38.3	intergenic
NODE_4786418_length_159756_cov_19.780233 mapping	32449	SNV	1	A	T	Homozygous	9	10	90	0.111111	38	intergenic
NODE_4786418_length_159756_cov_19.780233 mapping	32457	Deletion	1	T	-	Homozygous	7	10	70	0.142857	37.2857	intergenic
NODE_4786418_length_159756_cov_19.780233 mapping	36126	SNV	1	T	A	Homozygous	10	10	100	0.2	37.4	intergenic
NODE_4786418_length_159756_cov_19.780233 mapping	36133	SNV	1	T	A	Homozygous	11	11	100	0.272727	38.1818	intergenic
NODE_4786418_length_159756_cov_19.780233 mapping	113253	SNV	1	A	T	Homozygous	10	10	100	0.5	37.2	intergenic
NODE_4786418_length_159756_cov_19.780233 mapping	113256	SNV	1	C	T	Heterozygous	6	10	60	0.333333	39.6667	intergenic
NODE_4786418_length_159756_cov_19.780233 mapping	113256	SNV	1	C	G	Heterozygous	4	10	40	0.25	35	intergenic
NODE_4786418_length_159756_cov_19.780233 mapping	113272	SNV	1	A	C	Homozygous	11	11	100	0.454545	37.1818	intergenic
NODE_4786418_length_159756_cov_19.780233 mapping	113279	SNV	1	T	A	Homozygous	10	10	100	0.5	35.8	intergenic
NODE_4786418_length_159756_cov_19.780233 mapping	113282	SNV	1	A	T	Homozygous	10	10	100	0.5	34.2	intergenic
NODE_4786418_length_159756_cov_19.780233 mapping	115452	SNV	1	T	C	Homozygous	5	11	45.4545	0.2	35.6	intergenic
NODE_4786418_length_159756_cov_19.780233 mapping	115456	SNV	1	A	G	Homozygous	10	10	100	0.1	37.4	intergenic
NODE_4786418_length_159756_cov_19.780233 mapping	115459	SNV	1	T	C	Homozygous	9	10	90	0.111111	37.3333	intergenic
NODE_4786418_length_159756_cov_19.780233 mapping	115464	SNV	1	G	A	Homozygous	10	10	100	0.1	38.3	intergenic
NODE_4786418_length_159756_cov_19.780233 mapping	115603	SNV	1	C	T	Homozygous	3	11	27.2727	0.25	37.75	intergenic
NODE_4786418_length_159756_cov_19.780233 mapping	115642	SNV	1	A	C	Homozygous	9	10	90	0.1	38.6	intergenic
NODE_4786418_length_159756_cov_19.780233 mapping	121380	SNV	1	A	G	Homozygous	10	10	100	0.5	38.9286	intergenic
NODE_4786418_length_159756_cov_19.780233 mapping	121382	SNV	1	A	G	Homozygous	10	10	100	0.5	36.5	intergenic
NODE_4800350_length_80608_cov_11.657032 mapping	392	SNV	1	C	A	Homozygous	10	10	100	0.4	36.9	exon
NODE_4800350_length_80608_cov_11.657032 mapping	1772	SNV	1	C	T	Homozygous	7	11	63.6364	0.428571	38.7143	intron
NODE_4800350_length_80608_cov_11.657032 mapping	1804	SNV	1	A	C	Homozygous	10	10	100	0.4	38	intron
NODE_4800350_length_80608_cov_11.657032 mapping	1959	SNV	1	C	T	Homozygous	12	12	100	0.416667	37.75	intron
NODE_4800350_length_80608_cov_11.657032 mapping	1984	SNV	1	A	G	Homozygous	10	10	100	0.3	39.5	intron
NODE_4800350_length_80608_cov_11.657032 mapping	1998	SNV	1	G	A	Homozygous	12	12	100	0.416667	38.25	intron
NODE_4800350_length_80608_cov_11.657032 mapping	2111	SNV	1	T	C	Homozygous	10	10	100	0.2	38.2	exon
NODE_4800350_length_80608_cov_11.657032 mapping	2229	SNV	1	T	G	Homozygous	6	10	60	0.166667	37.8333	intron
NODE_4800350_length_80608_cov_11.657032 mapping	2237	SNV	1	T	A	Homozygous	10	10	100	0.1	36	intron
NODE_4800350_length_80608_cov_11.657032 mapping	14806	SNV	1	G	A	Homozygous	12	12	100	0.333333	39.4167	intron
NODE_4800350_length_80608_cov_11.657032 mapping	14814	Deletion	2	TG	-	Heterozygous	7	12	58.3333	0.285714	36.2857	intron
NODE_4800350_length_80608_cov_11.657032 mapping	69664	SNV	1	G	T	Homozygous	10	10	100	0.1	39.5	intergenic
NODE_4799959_length_46025_cov_16.225096 mapping	11505	SNV	1	A	T	Homozygous	9	10	90	0.444444	36.2222	intergenic
NODE_4799959_length_46025_cov_16.225096 mapping	11509	SNV	1	T	C	Homozygous	9	10	90	0.444444	38.1111	intergenic
NODE_4804818_length_12138_cov_7.499506 mapping	1110	SNV	1	A	G	Homozygous	11	11	100	0.0909091	31	intergenic
NODE_4804818_length_12138_cov_7.499506 mapping	1113	SNV	1	T	C	Homozygous	11	11	100	0.0909091	33.2727	intergenic
NODE_4768823_length_194450_cov_15.311371 mapping	62039	Deletion	1	C	-	Homozygous	13	16	81.25	0.47619	37.8095	intergenic
NODE_4768823_length_194450_cov_15.311371 mapping	62041	MNV	2	AA	TG	Homozygous	16	16	100	0.375	39.1562	intergenic
NODE_4768823_length_194450_cov_15.311371 mapping	62051	SNV	1	A	G	Heterozygous	2	16	12.5	0.5	39.75	intergenic
NODE_4768823_length_194450_cov_15.311371 mapping	62053	SNV	1	T	C	Homozygous	15	16	93.75	0.444444	38.4444	intergenic
NODE_4768823_length_194450_cov_15.311371 mapping	62055	SNV	1	A	C	Homozygous	14	16	87.5	0.44	39.6	intergenic
NODE_4768823_length_194450_cov_15.311371 mapping	62063	SNV	1	T	C	Homozygous	12	16	75	0.454545	39.8636	intergenic
NODE_4768823_length_194450_cov_15.311371 mapping	62069	SNV	1	A	T	Homozygous	14	16	87.5	0.481481	39.5926	intergenic
NODE_4768823_length_194450_cov_15.311371 mapping	62080	SNV	1	T	C	Homozygous	13	16	81.25	0.48	37.84	intergenic
NODE_4768823_length_194450_cov_15.311371 mapping	62084	SNV	1	T	C	Homozygous	10	16	62.5	0.473684	35.4737	intergenic
NODE_4768823_length_194450_cov_15.311371 mapping	62086	SNV	1	C	T	Homozygous	8	16	50	0.466667	40.4	intergenic
NODE_4768823_length_194450_cov_15.311371 mapping	62105	Deletion	1	C	-	Homozygous	8	12	66.6667	0.454545	36.8182	intergenic
NODE_4768823_length_194450_cov_15.311371 mapping	62107	MNV	2	AA	TG	Heterozygous	9	12	75	0.444444	36	intergenic
NODE_4768823_length_194450_cov_15.311371 mapping	62108	SNV	1	A	G	Heterozygous	3	12	25	0.333333	39	intergenic
NODE_4804046_length_10385_cov_4.047376 mapping	1577	SNV	1	T	C	Heterozygous	4	17	23.5294	0.5	33.75	intergenic
NODE_4807211_length_117275_cov_16.928211 mapping	66958	SNV	1	A	T	Homozygous	10	10	100	0.4	38.1	intergenic
NODE_4807211_length_117275_cov_16.928211 mapping	66983	SNV	1	A	G	Homozygous	11	11	100	0.181818	36.4545	intergenic
NODE_4807211_length_117275_cov_16.928211 mapping	67028	SNV	1	G	A	Homozygous	11	11	100	0.181818	39.2727	intergenic
NODE_4807211_length_117275_cov_16.928211 mapping	67035	SNV	1	T	C	Homozygous	11	11	100	0.181818	38.0909	intergenic
NODE_4807211_length_117275_cov_16.928211 mapping	67153	SNV	1	T	C	Homozygous	10	10	100	0.2	39.1	intergenic
NODE_4807211_length_117275_cov_16.928211 mapping	67155	SNV	1	G	A	Homozygous	10	10	100	0.2	38.2	intergenic
NODE_4807211_length_117275_cov_16.928211 mapping	67172	SNV	1	A	G	Homozygous	10	10	100	0.1	39.7	intergenic
NODE_4807211_length_117275_cov_16.928211 mapping	67191	SNV	1	A	T	Homozygous	10	10	100	0.1	40.4	intergenic
NODE_4807211_length_117275_cov_16.928211 mapping	75648	Insertion	1	-	A	Homozygous	11	11	100	0.454545	38.4545	intergenic
NODE_4807211_length_117275_cov_16.928211 mapping	75670	SNV	1	T	G	Homozygous	16	16	100	0.4375	38.375	intergenic
NODE_4807211_length_117275_cov_16.928211 mapping	75683	SNV	1	A	G	Homozygous	17	17	100	0.470588	32.5882	intergenic
NODE_4807211_length_117275_cov_16.928211 mapping	75732	SNV	1	T	C	Homozygous	10	10	100	0.5	33.6	intergenic
NODE_4807211_length_117275_cov_16.928211 mapping	76490	SNV	1	T	G	Homozygous	11	11	100	0.363636	36.1818	intergenic
NODE_4807211_length_117275_cov_16.928211 mapping	76509	Deletion	1	T	-	Homozygous	14	14	100	0.357143	38.7143	intergenic
NODE_4807211_length_117275_cov_16.928211 mapping	76512	Insertion	1	-	A	Homozygous	14	14	100	0.357143	38.7857	intergenic
NODE_4807211_length_117275_cov_16.928211 mapping	76545	SNV	1	A	T	Homozygous	12	12	100	0.416667	39.3333	intergenic
NODE_4807211_length_117275_cov_16.928211 mapping	76698	SNV	1	T	C	Homozygous	10	10	100	0.4	37.5	intergenic
NODE_4807211_length_117275_cov_16.928211 mapping	76705	SNV	1	T	C	Homozygous	10	10	100	0.4	34.8	intergenic
NODE_4807211_length_117275_cov_16.928211 mapping	76728	SNV	1	A	C	Homozygous	12	12	100	0.333333	36.25	intergenic
NODE_4807211_length_117275_cov_16.928211 mapping	76731	SNV	1	C	A	Homozygous	12	12	100	0.333333	34.8333	intergenic
NODE_4807211_length_117275_cov_16.928211 mapping	76985	SNV	1	A	G	Homozygous	10	10	100	0.4	38.8	intergenic
NODE_4807211_length_117275_cov_16.928211 mapping	77012	SNV	1	A	G	Homozygous	10	10	100	0.3	39.5	intergenic
NODE_4807211_length_117275_cov_16.928211 mapping	77026	SNV	1	C	T	Homozygous	12	12	100	0.25	38.8333	intergenic
NODE_4807211_length_117275_cov_16.928211 mapping	77039	SNV	1	T	C	Homozygous	13	13	100	0.384615	39.6154	intergenic
NODE_4807211_length_117275_cov_16.928211 mapping	77058	SNV	1	T	A	Homozygous	10	10	100	0.4	39.9	intergenic
NODE_4807211_length_117275_cov_16.928211 mapping	77063	SNV	1	G	T	Homozygous	10	10	100	0.4	39.7	intergenic
NODE_4807211_length_117275_cov_16.928211 mapping	77179	SNV	1	C	T	Homozygous	10	10	100	0.5	38.1	intergenic
NODE_4807211_length_117275_cov_16.928211 mapping	77193	SNV	1	T	A	Homozygous	10	10	100	0.5	36	intergenic
NODE_4807211_length_117275_cov_16.928211 mapping	77224	SNV	1	A	T	Homozygous	10	10	100	0.3	37.4	intergenic
NODE_4807211_length_117275_cov_16.928211 mapping	77259	SNV	1	T	C	Homozygous	10	10	100	0.5	38.9	intergenic
NODE_4807211_length_117275_cov_16.928211 mapping	77267	MNV	2	TG	AT	Homozygous	10	10	100	0.4	39.05	intergenic
NODE_4807211_length_117275_cov_16.928211 mapping	77275	SNV	1	A	G	Homozygous	11	11	100	0.363636	38.5455	intergenic
NODE_4807211_length_117275_cov_16.928211 mapping	77296	SNV	1	T	G	Homozygous	13	13	100	0.384615	38	intergenic
NODE_4807211_length_117275_cov_16.928211 mapping	77308	SNV	1	A	C	Homozygous	11	11	100	0.454545	37.8182	intergenic
NODE_4807211_length_117275_cov_16.928211 mapping	77314	SNV	1	T	C	Homozygous	11	11	100	0.454545	35.7273	intergenic
NODE_4807211_length_117275_cov_16.928211 mapping	77322	SNV	1	A	G	Homozygous	10	10	100	0.5	37.4	intergenic
NODE_4807211_length_117275_cov_16.928211 mapping	77324	SNV	1	T	A	Homozygous	10	10	100	0.5	37.2	intergenic
NODE_4807211_length_117275_cov_16.928211 mapping	77459	MNV	2	GA	AG	Homozygous	10	10	100	0.4	39.2	intergenic
NODE_4807211_length_117275_cov_16.928211 mapping	77496	SNV	1	T	G	Homozygous	10	10	100	0.2	33.6	intergenic
NODE_4807211_length_117275_cov_16.928211 mapping	77499	SNV	1	T	G	Homozygous	10	10	100	0.2	36.9	intergenic
NODE_4807211_length_117275_cov_16.928211 mapping	77501	SNV	1	T	C	Homozygous	10	10	100	0.2	37.6	intergenic
NODE_4807211_length_117275_cov_16.928211 mapping	77504	SNV	1	C	T	Homozygous	10	10	100	0.2	36.8	intergenic
NODE_4807211_length_117275_cov_16.928211 mapping	77507	SNV	1	A	G	Homozygous	10	10	100	0.2	36.2	intergenic
NODE_4807211_length_117275_cov_16.928211 mapping	77517	SNV	1	A	G	Homozygous	12	12	100	0.416667	34.5833	intergenic
NODE_4807211_length_117275_cov_16.928211 mapping	77541	SNV	1	A	G	Homozygous	12	12	100	0.416667	36.8333	intergenic
NODE_4807211_length_117275_cov_16.928211 mapping	77563	SNV	1	A	T	Homozygous	11	11	100	0.454545	34.7273	intergenic
NODE_4807211_length_117275_cov_16.928211 mapping	77568	SNV	1	A	G	Homozygous	11	11	100	0.454545	34.3636	intergenic
NODE_4807211_length_117275_cov_16.928211 mapping	77645	SNV	1	T	A	Homozygous	10	10	100	0.3	37.3	intergenic
NODE_4807211_length_117275_cov_16.928211 mapping	77656	SNV	1	G	T	Homozygous	10	10	100	0.3	38	intergenic
NODE_4806820_length_13189_cov_17.102661 mapping	5582	SNV	1	C	T	Homozygous	10	10	100	0.5	38.1	intergenic
NODE_4806820_length_13189_cov_17.102661 mapping	7892	SNV	1	A	G	Homozygous	11	11	100	0.0909091	38.7273	intergenic
NODE_4806820_length_13189_cov_17.102661 mapping	7909	SNV	1	G	T	Homozygous	14	14	100	0.142857	39.2143	intergenic
NODE_4806820_length_13189_cov_17.102661 mapping	7954	SNV	1	T	C	Homozygous	14	14	100	0.214286	37.1429	intergenic
NODE_4806820_length_13189_cov_17.102661 mapping	7956	SNV	1	A	T	Homozygous	14	14	100	0.214286	39.2143	intergenic
NODE_4806820_length_13189_cov_17.102661 mapping	8050	SNV	1	G	A	Homozygous	11	11	100	0.272727	37.8182	intergenic
NODE_4806820_length_13189_cov_17.102661 mapping	8055	Deletion	6	TCCTGA	-	Homozygous	11	11	100	0.272727	38.1475	intergenic
NODE_4806820_length_13189_cov_17.102661 mapping	8066	SNV	1	G	T	Homozygous	11	11	100	0.181818	36.5455	intergenic
NODE_4806820_length_13189_cov_17.102661 mapping	8080	MNV	2	CT	TG	Homozygous	11	11	100	0.181818	35	intergenic
NODE_4806820_length_13189_cov_17.102661 mapping	8088	SNV	1	T	A	Homozygous	12	12	100	0.166667	37	intergenic
NODE_4806820_length_13189_cov_17.102661 mapping	8187	SNV	1	G	A	Homozygous	10	10	100	0.2	37.8	intergenic
NODE_4806820_length_13189_cov_17.102661 mapping	8260	SNV	1	G	T	Homozygous	10	10	100	0.4	36.1	intergenic
NODE_4806820_length_13189_cov_17.102661 mapping	8271	Deletion	1	T	-	Homozygous	10	10	100	0.2	38.2	intergenic
NODE_4806820_length_13189_cov_17.102661 mapping	8370	SNV	1	T	C	Homozygous	11	11	100	0.454545	37	intergenic
NODE_4806820_length_13189_cov_17.102661 mapping	8379	Insertion	1	-	A	Homozygous	11	11	100	0.454545	38	intergenic
NODE_4806820_length_13189_cov_17.102661 mapping	8389	Deletion	1	A	-	Homozygous	13	13	100	0.384615	36.8462	intergenic
NODE_4806820_length_13189_cov_17.102661 mapping	8423	SNV	1	G	T	Homozygous	12	12	100	0.333333	36.75	intergenic
NODE_4806820_length_13189_cov_17.102661 mapping	8434	SNV	1	T	G	Homozygous	11	11	100	0.272727	36.2727	intergenic
NODE_4806820_length_13189_cov_17.102661 mapping	8440	SNV	1	A	G	Homozygous	11	11	100	0.272727	36.9091	intergenic
NODE_4803851_length_48022_cov_18.232122 mapping	18135	SNV	1	A	T	Homozygous	12	12	100	0.416667	34.75	intron
NODE_4803851_length_48022_cov_18.232122 mapping	36151	SNV	1	A	C	Homozygous	11	11	100	0.0909091	37.3636	intron
NODE_4803851_length_48022_cov_18.232122 mapping	36156	SNV	1	G	A	Homozygous	11	11	100	0.0909091	38.6364	intron
NODE_4808044_length_24505_cov_14.290961 mapping	23012	SNV	1	A	G	Homozygous	18	20	90	0.15	34.55	intergenic
NODE_4808044_length_24505_cov_14.290961 mapping	23051	SNV	1	A	T	Homozygous	27	27	100	0.1	38.7	intergenic
NODE_4808044_length_24505_cov_14.290961 mapping	23060	SNV	1	A	T	Homozygous	25	25	100	0.107143	38.5714	intergenic
NODE_4808044_length_24505_cov_14.290961 mapping	23064	MNV	3	TTG	CCA	Homozygous	24	24	100	0.0416667	39.6389	intergenic
NODE_4808044_length_24505_cov_14.290961 mapping	23072	MNV	2	TC	CT	Homozygous	24	24	100	0.0416667	39.5208	intergenic
NODE_4808044_length_24505_cov_14.290961 mapping	23075	SNV	1	G	A	Homozygous	23	24	95.8333	0.115385	38.8077	intergenic
NODE_4808044_length_24505_cov_14.290961 mapping	23087	SNV	1	T	G	Homozygous	14	15	93.3333	0.0666667	39.2	intergenic
NODE_4808044_length_24505_cov_14.290961 mapping	23096	SNV	1	G	A	Homozygous	14	14	100	0.0666667	34.6	intergenic
NODE_4801684_length_362600_cov_18.039707 mapping	48436	SNV	1	C	G	Homozygous	13	13	100	0.230769	37.6154	intergenic
NODE_4801684_length_362600_cov_18.039707 mapping	48441	SNV	1	G	C	Homozygous	12	13	92.3077	0.25	35.9167	intergenic
NODE_4801684_length_362600_cov_18.039707 mapping	48449	SNV	1	C	T	Homozygous	14	14	100	0.214286	38.4286	intergenic
NODE_4801684_length_362600_cov_18.039707 mapping	48463	SNV	1	A	G	Homozygous	11	11	100	0.272727	37.9091	intergenic
NODE_4801684_length_362600_cov_18.039707 mapping	48465	SNV	1	C	T	Homozygous	4	11	36.3636	0.25	38	intergenic
NODE_4801684_length_362600_cov_18.039707 mapping	48555	SNV	1	T	C	Homozygous	11	11	100	0.454545	34.0909	intergenic
NODE_4801684_length_362600_cov_18.039707 mapping	48580	MNV	2	TA	CG	Heterozygous	8	21	38.0952	0.5	38.3125	intergenic
NODE_4801684_length_362600_cov_18.039707 mapping	48581	SNV	1	A	G	Heterozygous	13	21	61.9048	0.384615	31.6538	intergenic
NODE_4801684_length_362600_cov_18.039707 mapping	48603	SNV	1	G	T	Homozygous	19	19	100	0.368421	36.8421	intergenic
NODE_4801684_length_362600_cov_18.039707 mapping	48610	SNV	1	C	A	Heterozygous	12	17	70.5882	0.166667	38.875	intergenic
NODE_4801684_length_362600_cov_18.039707 mapping	48610	MNV	2	CT	AG	Heterozygous	5	17	29.4118	0.4	39.3	intergenic
NODE_4801684_length_362600_cov_18.039707 mapping	48613	SNV	1	G	T	Heterozygous	11	17	64.7059	0.181818	37.4091	intergenic
NODE_4801684_length_362600_cov_18.039707 mapping	48613	MNV	2	GC	TT	Heterozygous	6	17	35.2941	0.5	37.25	intergenic
NODE_4801684_length_362600_cov_18.039707 mapping	48627	SNV	1	G	A	Homozygous	16	16	100	0.3125	37.25	intergenic
NODE_4801684_length_362600_cov_18.039707 mapping	48647	SNV	1	T	G	Homozygous	8	10	80	0.375	36.875	intergenic
NODE_4801684_length_362600_cov_18.039707 mapping	48743	SNV	1	T	C	Homozygous	10	10	100	0.2	37.3	intergenic
NODE_4801684_length_362600_cov_18.039707 mapping	48746	SNV	1	T	C	Homozygous	10	10	100	0.2	37.5	intergenic
NODE_4801684_length_362600_cov_18.039707 mapping	48753	SNV	1	T	A	Homozygous	11	11	100	0.272727	39.1818	intergenic
NODE_4801684_length_362600_cov_18.039707 mapping	48764	SNV	1	G	T	Homozygous	12	12	100	0.333333	39.5833	intergenic
NODE_4801684_length_362600_cov_18.039707 mapping	48781	SNV	1	C	T	Homozygous	10	10	100	0.4	39.5	intergenic
NODE_4801684_length_362600_cov_18.039707 mapping	75429	Insertion	1	-	A	Heterozygous	5	12	41.6667	0.333333	40.6667	exon
NODE_4801684_length_362600_cov_18.039707 mapping	75440	SNV	1	A	G	Heterozygous	6	12	50	0.333333	37.3333	exon
NODE_4801684_length_362600_cov_18.039707 mapping	75449	SNV	1	A	C	Heterozygous	5	11	45.4545	0.4	37.2	exon
NODE_4801684_length_362600_cov_18.039707 mapping	75459	Deletion	1	G	-	Heterozygous	6	10	60	0.5	40.1667	exon
NODE_4801684_length_362600_cov_18.039707 mapping	75579	SNV	1	A	C	Homozygous	9	11	81.8182	0.444444	36.7778	exon
NODE_4801684_length_362600_cov_18.039707 mapping	75626	Insertion	1	-	C	Heterozygous	5	14	35.7143	0.4	38.2	exon
NODE_4801684_length_362600_cov_18.039707 mapping	76078	SNV	1	C	T	Heterozygous	4	10	40	0.25	38.75	exon
NODE_4801684_length_362600_cov_18.039707 mapping	76086	SNV	1	G	T	Heterozygous	7	12	58.3333	0.428571	39.8571	exon
NODE_4801684_length_362600_cov_18.039707 mapping	76108	SNV	1	C	A	Homozygous	12	12	100	0.333333	37.8333	exon
NODE_4801684_length_362600_cov_18.039707 mapping	76113	SNV	1	C	T	Homozygous	12	12	100	0.333333	35.9167	exon
NODE_4801684_length_362600_cov_18.039707 mapping	79132	SNV	1	T	A	Homozygous	5	16	31.25	0.2	36.6	intron
NODE_4801684_length_362600_cov_18.039707 mapping	79151	SNV	1	C	T	Homozygous	7	13	53.8462	0.142857	36.2857	intron
NODE_4801684_length_362600_cov_18.039707 mapping	79226	SNV	1	T	A	Heterozygous	2	12	16.6667	0.5	40	intron
NODE_4801684_length_362600_cov_18.039707 mapping	79228	SNV	1	G	T	Heterozygous	5	12	41.6667	0.2	35.6	intron
NODE_4801684_length_362600_cov_18.039707 mapping	79235	MNV	2	TG	CA	Heterozygous	8	13	61.5385	0.125	35.4375	intron
NODE_4801684_length_362600_cov_18.039707 mapping	79267	SNV	1	T	G	Homozygous	15	15	100	0.133333	36.7333	intron
NODE_4801684_length_362600_cov_18.039707 mapping	79270	SNV	1	G	T	Heterozygous	6	16	37.5	0.166667	37.1667	intron
NODE_4801684_length_362600_cov_18.039707 mapping	79273	SNV	1	T	G	Heterozygous	5	18	27.7778	0.2	37.8	intron
NODE_4801684_length_362600_cov_18.039707 mapping	79302	SNV	1	G	T	Heterozygous	12	18	66.6667	0.230769	38.5385	intron
NODE_4801684_length_362600_cov_18.039707 mapping	88203	SNV	1	G	A	Homozygous	6	11	54.5455	0.166667	38.3333	intron
NODE_4801684_length_362600_cov_18.039707 mapping	93353	SNV	1	A	C	Homozygous	13	13	100	0.307692	38.0769	intron
NODE_4801684_length_362600_cov_18.039707 mapping	93364	Replacement	3	GTA	C	Heterozygous	6	15	40	0.166667	39.9444	intron
NODE_4801684_length_362600_cov_18.039707 mapping	93376	SNV	1	G	A	Heterozygous	4	17	23.5294	0.5	37.75	intron
NODE_4801684_length_362600_cov_18.039707 mapping	93380	SNV	1	A	G	Homozygous	17	17	100	0.470588	38.4118	intron
NODE_4801684_length_362600_cov_18.039707 mapping	93391	SNV	1	G	A	Heterozygous	10	18	55.5556	0.4	39	intron
NODE_4801684_length_362600_cov_18.039707 mapping	93403	SNV	1	T	G	Heterozygous	7	16	43.75	0.285714	38	intron
NODE_4801684_length_362600_cov_18.039707 mapping	93450	SNV	1	C	T	Heterozygous	4	10	40	0.5	37.25	intron
NODE_4801684_length_362600_cov_18.039707 mapping	93958	SNV	1	C	T	Heterozygous	2	10	20	0.333333	39.6667	intron
NODE_4801684_length_362600_cov_18.039707 mapping	93973	SNV	1	C	T	Heterozygous	3	11	27.2727	0.333333	38.3333	intron
NODE_4801684_length_362600_cov_18.039707 mapping	93975	SNV	1	T	A	Heterozygous	9	11	81.8182	0.222222	38.8889	intron
NODE_4801684_length_362600_cov_18.039707 mapping	93977	SNV	1	T	C	Heterozygous	9	11	81.8182	0.222222	37.8889	intron
NODE_4801684_length_362600_cov_18.039707 mapping	93982	SNV	1	T	C	Homozygous	11	11	100	0.333333	38.4167	intron
NODE_4801684_length_362600_cov_18.039707 mapping	93988	SNV	1	C	T	Heterozygous	3	10	30	0.5	39	intron
NODE_4801684_length_362600_cov_18.039707 mapping	93992	Insertion	2	-	AA	Heterozygous	3	10	30	0.333333	35	intron
NODE_4801684_length_362600_cov_18.039707 mapping	93994	SNV	1	T	A	Heterozygous	6	10	60	0.166667	35.0833	intron
NODE_4801684_length_362600_cov_18.039707 mapping	93994	MNV	2	TT	AA	Heterozygous	4	10	40	0.25	39.875	intron
NODE_4801684_length_362600_cov_18.039707 mapping	98347	MNV	2	TC	GT	Homozygous	11	11	100	0.0909091	38.5	intron
NODE_4801684_length_362600_cov_18.039707 mapping	98369	SNV	1	G	A	Homozygous	6	14	42.8571	0.333333	37.5	intron
NODE_4801684_length_362600_cov_18.039707 mapping	98381	SNV	1	T	A	Heterozygous	8	16	50	0.125	36.75	intron
NODE_4801684_length_362600_cov_18.039707 mapping	98386	SNV	1	A	G	Heterozygous	7	14	50	0.428571	38.4286	intron
NODE_4801684_length_362600_cov_18.039707 mapping	98386	SNV	1	A	T	Heterozygous	7	14	50	0.142857	34.5714	intron
NODE_4801684_length_362600_cov_18.039707 mapping	98401	SNV	1	T	G	Homozygous	10	10	100	0.4	39.8	intron
NODE_4801684_length_362600_cov_18.039707 mapping	98438	SNV	1	T	A	Homozygous	11	11	100	0.363636	39	intron
NODE_4801684_length_362600_cov_18.039707 mapping	98445	SNV	1	T	G	Homozygous	12	12	100	0.333333	37.5	intron
NODE_4801684_length_362600_cov_18.039707 mapping	98457	SNV	1	A	C	Heterozygous	6	17	35.2941	0.333333	38.3333	intron
NODE_4801684_length_362600_cov_18.039707 mapping	98459	SNV	1	C	T	Heterozygous	6	17	35.2941	0.333333	37.6667	intron
NODE_4801684_length_362600_cov_18.039707 mapping	98469	SNV	1	G	A	Homozygous	20	20	100	0.4	38.4	intron
NODE_4801684_length_362600_cov_18.039707 mapping	98474	Deletion	1	G	-	Heterozygous	10	18	55.5556	0.3	37.8	intron
NODE_4801684_length_362600_cov_18.039707 mapping	98479	Deletion	1	A	-	Heterozygous	10	19	52.6316	0.3	38.2	intron
NODE_4801684_length_362600_cov_18.039707 mapping	98492	SNV	1	T	C	Heterozygous	9	23	39.1304	0.444444	40.2222	intron
NODE_4801684_length_362600_cov_18.039707 mapping	98521	SNV	1	A	T	Heterozygous	10	26	38.4615	0.5	40	intron
NODE_4801684_length_362600_cov_18.039707 mapping	98523	SNV	1	A	G	Heterozygous	10	26	38.4615	0.5	39.7	intron
NODE_4801684_length_362600_cov_18.039707 mapping	98528	Deletion	2	TG	-	Heterozygous	10	26	38.4615	0.5	39.6	intron
NODE_4801684_length_362600_cov_18.039707 mapping	98533	Deletion	7	GTCAAAA	-	Heterozygous	10	21	47.619	0.4	36.3	intron
NODE_4801684_length_362600_cov_18.039707 mapping	98542	SNV	1	G	A	Heterozygous	11	21	52.381	0.454545	39.8182	intron
NODE_4801684_length_362600_cov_18.039707 mapping	98544	SNV	1	G	T	Heterozygous	11	21	52.381	0.454545	39.7273	intron
NODE_4801684_length_362600_cov_18.039707 mapping	98569	MNV	2	AT	CC	Heterozygous	7	16	43.75	0.428571	39.3571	intron
NODE_4801684_length_362600_cov_18.039707 mapping	98574	SNV	1	G	T	Heterozygous	10	17	58.8235	0.2	37.1	intron
NODE_4801684_length_362600_cov_18.039707 mapping	98580	SNV	1	A	G	Heterozygous	10	20	50	0.2	37.2	intron
NODE_4801684_length_362600_cov_18.039707 mapping	98587	SNV	1	C	T	Homozygous	9	17	52.9412	0.333333	34.5556	intron
NODE_4801684_length_362600_cov_18.039707 mapping	99862	SNV	1	T	C	Homozygous	10	10	100	0.2	36.3	exon
NODE_4801684_length_362600_cov_18.039707 mapping	100040	SNV	1	G	A	Homozygous	4	10	40	0.25	34.75	exon
NODE_4801684_length_362600_cov_18.039707 mapping	100043	Insertion	2	-	AG	Homozygous	10	10	100	0.1	38.85	exon
NODE_4801684_length_362600_cov_18.039707 mapping	100798	SNV	1	T	A	Homozygous	6	11	54.5455	0.5	37.6667	intron
NODE_4801684_length_362600_cov_18.039707 mapping	105511	SNV	1	A	G	Heterozygous	4	11	36.3636	0.25	37.5	intergenic
NODE_4801684_length_362600_cov_18.039707 mapping	105512	SNV	1	A	C	Heterozygous	3	12	25	0.333333	39.6667	intergenic
NODE_4801684_length_362600_cov_18.039707 mapping	105537	SNV	1	A	G	Heterozygous	4	13	30.7692	0.5	39.5	intergenic
NODE_4801684_length_362600_cov_18.039707 mapping	105555	MNV	2	GT	TA	Homozygous	12	12	100	0.416667	38.7083	intergenic
NODE_4801684_length_362600_cov_18.039707 mapping	105567	SNV	1	G	A	Heterozygous	8	12	66.6667	0.5	38.875	intergenic
NODE_4801684_length_362600_cov_18.039707 mapping	105572	SNV	1	T	A	Heterozygous	7	12	58.3333	0.285714	39.5714	intergenic
NODE_4801684_length_362600_cov_18.039707 mapping	105572	SNV	1	T	G	Heterozygous	5	12	41.6667	0.4	39.6	intergenic
NODE_4801684_length_362600_cov_18.039707 mapping	105577	SNV	1	A	C	Heterozygous	4	11	36.3636	0.25	40.75	intergenic
NODE_4801684_length_362600_cov_18.039707 mapping	105581	SNV	1	A	C	Heterozygous	6	10	60	0.5	37.6667	intergenic
NODE_4801684_length_362600_cov_18.039707 mapping	105581	SNV	1	A	T	Heterozygous	4	10	40	0.25	41	intergenic
NODE_4801684_length_362600_cov_18.039707 mapping	105709	SNV	1	G	A	Heterozygous	5	10	50	0.2	37.4	intergenic
NODE_4801684_length_362600_cov_18.039707 mapping	105712	SNV	1	G	T	Heterozygous	5	10	50	0.2	32	intergenic
NODE_4801684_length_362600_cov_18.039707 mapping	105755	Insertion	1	-	C	Heterozygous	2	14	14.2857	0.5	36	intergenic
NODE_4801684_length_362600_cov_18.039707 mapping	105758	SNV	1	A	C	Heterozygous	10	12	83.3333	0.3	38.2	intergenic
NODE_4801684_length_362600_cov_18.039707 mapping	105758	SNV	1	A	T	Heterozygous	2	12	16.6667	0.5	37	intergenic
NODE_4801684_length_362600_cov_18.039707 mapping	105780	SNV	1	T	C	Homozygous	10	10	100	0.4	39.7	intergenic
NODE_4801684_length_362600_cov_18.039707 mapping	105785	MNV	2	CA	TG	Heterozygous	3	10	30	0.333333	39.1667	intergenic
NODE_4801684_length_362600_cov_18.039707 mapping	105786	SNV	1	A	G	Heterozygous	7	10	70	0.285714	39.5714	intergenic
NODE_4801684_length_362600_cov_18.039707 mapping	105789	SNV	1	A	G	Heterozygous	6	10	60	0.5	37.5	intergenic
NODE_4801684_length_362600_cov_18.039707 mapping	105804	SNV	1	A	C	Heterozygous	5	10	50	0.2	37.8	intergenic
NODE_4801684_length_362600_cov_18.039707 mapping	105960	SNV	1	A	T	Heterozygous	5	10	50	0.4	37.6	intergenic
NODE_4801684_length_362600_cov_18.039707 mapping	105964	MNV	2	CC	TG	Homozygous	10	10	100	0.4	36.65	intergenic
NODE_4801684_length_362600_cov_18.039707 mapping	105970	SNV	1	A	G	Heterozygous	6	12	50	0.5	39.1667	intergenic
NODE_4801684_length_362600_cov_18.039707 mapping	105972	SNV	1	A	G	Homozygous	12	12	100	0.416667	38.5833	intergenic
NODE_4801684_length_362600_cov_18.039707 mapping	105975	SNV	1	C	A	Heterozygous	6	12	50	0.5	38.8333	intergenic
NODE_4801684_length_362600_cov_18.039707 mapping	105976	SNV	1	T	A	Heterozygous	6	12	50	0.333333	38	intergenic
NODE_4801684_length_362600_cov_18.039707 mapping	106132	SNV	1	T	C	Heterozygous	5	12	41.6667	0.2	38.2	intergenic
NODE_4801684_length_362600_cov_18.039707 mapping	106155	SNV	1	A	C	Homozygous	12	12	100	0.5	39.6667	intergenic
NODE_4801684_length_362600_cov_18.039707 mapping	106177	SNV	1	G	A	Homozygous	13	13	100	0.384615	37.6154	intergenic
NODE_4801684_length_362600_cov_18.039707 mapping	106179	SNV	1	T	A	Heterozygous	4	13	30.7692	0.25	37	intergenic
NODE_4801684_length_362600_cov_18.039707 mapping	106181	MNV	2	CC	TG	Homozygous	12	12	100	0.416667	38.5	intergenic
NODE_4801684_length_362600_cov_18.039707 mapping	106193	SNV	1	C	T	Heterozygous	4	10	40	0.25	40.5	intergenic
NODE_4801684_length_362600_cov_18.039707 mapping	106570	MNV	2	TA	AC	Homozygous	13	13	100	0.461538	38.6923	intergenic
NODE_4801684_length_362600_cov_18.039707 mapping	106577	SNV	1	T	C	Homozygous	13	13	100	0.461538	40.4615	intergenic
NODE_4801684_length_362600_cov_18.039707 mapping	107319	SNV	1	A	G	Homozygous	11	11	100	0.363636	36.5455	intergenic
NODE_4801684_length_362600_cov_18.039707 mapping	107324	SNV	1	T	A	Heterozygous	6	14	42.8571	0.5	39.1667	intergenic
NODE_4801684_length_362600_cov_18.039707 mapping	107335	MNV	2	GT	AA	Homozygous	16	16	100	0.375	37.75	intergenic
NODE_4801684_length_362600_cov_18.039707 mapping	107343	SNV	1	A	G	Heterozygous	7	16	43.75	0.428571	37.2857	intergenic
NODE_4801684_length_362600_cov_18.039707 mapping	107345	SNV	1	T	C	Homozygous	16	16	100	0.375	38.0625	intergenic
NODE_4801684_length_362600_cov_18.039707 mapping	107349	SNV	1	C	G	Homozygous	16	16	100	0.375	37.5	intergenic
NODE_4801684_length_362600_cov_18.039707 mapping	107376	SNV	1	A	G	Heterozygous	3	16	18.75	0.333333	31.6667	intergenic
NODE_4801684_length_362600_cov_18.039707 mapping	107379	SNV	1	T	C	Heterozygous	11	15	73.3333	0.272727	36.7273	intergenic
NODE_4801684_length_362600_cov_18.039707 mapping	107387	SNV	1	A	G	Homozygous	13	13	100	0.307692	35.4615	intergenic
NODE_4801684_length_362600_cov_18.039707 mapping	107390	MNV	2	GA	TG	Homozygous	13	13	100	0.307692	31.9231	intergenic
NODE_4801684_length_362600_cov_18.039707 mapping	107399	SNV	1	A	T	Heterozygous	3	14	21.4286	0.333333	35.3333	intergenic
NODE_4801684_length_362600_cov_18.039707 mapping	107417	SNV	1	T	A	Heterozygous	3	10	30	0.333333	36.6667	intergenic
NODE_4801684_length_362600_cov_18.039707 mapping	107420	SNV	1	A	G	Homozygous	10	10	100	0.3	37.2	intergenic
NODE_4801684_length_362600_cov_18.039707 mapping	107450	SNV	1	T	A	Homozygous	10	10	100	0.5	32	intergenic
NODE_4801684_length_362600_cov_18.039707 mapping	107458	SNV	1	T	A	Homozygous	12	12	100	0.5	35.3333	intergenic
NODE_4801684_length_362600_cov_18.039707 mapping	107474	SNV	1	T	A	Heterozygous	5	14	35.7143	0.4	37.6	intergenic
NODE_4801684_length_362600_cov_18.039707 mapping	107480	SNV	1	A	T	Homozygous	13	13	100	0.384615	36.4615	intergenic
NODE_4801684_length_362600_cov_18.039707 mapping	107482	SNV	1	G	T	Homozygous	13	13	100	0.384615	38.2308	intergenic
NODE_4801684_length_362600_cov_18.039707 mapping	107532	SNV	1	T	A	Heterozygous	8	15	53.3333	0.125	35.75	intergenic
NODE_4801684_length_362600_cov_18.039707 mapping	107543	SNV	1	A	T	Heterozygous	6	12	50	0.166667	37.5	intergenic
NODE_4801684_length_362600_cov_18.039707 mapping	107554	SNV	1	G	C	Heterozygous	4	12	33.3333	0.25	35.5	intergenic
NODE_4801684_length_362600_cov_18.039707 mapping	107580	SNV	1	T	C	Heterozygous	6	11	54.5455	0.166667	38.5	intergenic
NODE_4801684_length_362600_cov_18.039707 mapping	107580	MNV	2	TA	CC	Heterozygous	5	11	45.4545	0.4	34.5	intergenic
NODE_4801684_length_362600_cov_18.039707 mapping	107719	SNV	1	C	T	Homozygous	10	10	100	0.4	35.6	intergenic
NODE_4801684_length_362600_cov_18.039707 mapping	107727	Deletion	1	T	-	Homozygous	10	10	100	0.4	36.8	intergenic
NODE_4801684_length_362600_cov_18.039707 mapping	107731	SNV	1	G	A	Homozygous	11	11	100	0.454545	38.2727	intergenic
NODE_4801684_length_362600_cov_18.039707 mapping	107736	SNV	1	G	A	Homozygous	12	12	100	0.5	38	intergenic
NODE_4801684_length_362600_cov_18.039707 mapping	108024	SNV	1	C	T	Homozygous	10	10	100	0.4	37.5	intergenic
NODE_4801684_length_362600_cov_18.039707 mapping	108030	SNV	1	C	A	Homozygous	11	11	100	0.272727	38.4545	intergenic
NODE_4801684_length_362600_cov_18.039707 mapping	108047	SNV	1	A	G	Homozygous	9	11	81.8182	0.444444	37.8889	intergenic
NODE_4801684_length_362600_cov_18.039707 mapping	108053	SNV	1	T	C	Heterozygous	6	12	50	0.333333	38	intergenic
NODE_4801684_length_362600_cov_18.039707 mapping	108058	SNV	1	A	T	Heterozygous	6	11	54.5455	0.333333	39.6667	intergenic
NODE_4801684_length_362600_cov_18.039707 mapping	108068	SNV	1	T	A	Heterozygous	3	10	30	0.333333	34.6667	intergenic
NODE_4801684_length_362600_cov_18.039707 mapping	108248	SNV	1	G	A	Homozygous	10	10	100	0.3	39.2	intergenic
NODE_4801684_length_362600_cov_18.039707 mapping	108281	SNV	1	C	T	Homozygous	10	10	100	0.3	37.7	intergenic
NODE_4801684_length_362600_cov_18.039707 mapping	108347	Deletion	1	A	-	Heterozygous	4	10	40	0.5	39.5	intergenic
NODE_4801684_length_362600_cov_18.039707 mapping	108362	SNV	1	C	T	Homozygous	10	10	100	0.5	40.6	intergenic
NODE_4801684_length_362600_cov_18.039707 mapping	108379	MNV	2	TC	CA	Heterozygous	8	12	66.6667	0.375	38.5	intergenic
NODE_4801684_length_362600_cov_18.039707 mapping	108379	MNV	3	TCT	CCA	Heterozygous	4	12	33.3333	0.5	40.9167	intergenic
NODE_4801684_length_362600_cov_18.039707 mapping	108400	SNV	1	A	C	Homozygous	13	13	100	0.384615	38.5385	intergenic
NODE_4801684_length_362600_cov_18.039707 mapping	110209	SNV	1	A	G	Homozygous	5	13	38.4615	0.2	37	intergenic
NODE_4801684_length_362600_cov_18.039707 mapping	110225	SNV	1	T	A	Heterozygous	4	17	23.5294	0.25	36.5	intergenic
NODE_4801684_length_362600_cov_18.039707 mapping	110228	SNV	1	A	G	Homozygous	17	17	100	0.470588	37.9412	intergenic
NODE_4801684_length_362600_cov_18.039707 mapping	110234	SNV	1	T	G	Heterozygous	9	19	47.3684	0.222222	38.1111	intergenic
NODE_4801684_length_362600_cov_18.039707 mapping	110250	SNV	1	A	G	Heterozygous	9	21	42.8571	0.111111	37.6667	intergenic
NODE_4801684_length_362600_cov_18.039707 mapping	110255	SNV	1	A	T	Heterozygous	10	21	47.619	0.1	39.5	intergenic
NODE_4801684_length_362600_cov_18.039707 mapping	110261	SNV	1	C	A	Homozygous	21	21	100	0.380952	38.1429	intergenic
NODE_4801684_length_362600_cov_18.039707 mapping	110267	SNV	1	C	T	Heterozygous	11	21	52.381	0.363636	37.6364	intergenic
NODE_4801684_length_362600_cov_18.039707 mapping	110282	SNV	1	A	C	Heterozygous	11	23	47.8261	0.454545	38.5455	intergenic
NODE_4801684_length_362600_cov_18.039707 mapping	110300	SNV	1	T	G	Heterozygous	13	25	52	0.461538	39.1538	intergenic
NODE_4801684_length_362600_cov_18.039707 mapping	110313	SNV	1	T	C	Heterozygous	14	28	50	0.5	37.1429	intergenic
NODE_4801684_length_362600_cov_18.039707 mapping	110318	SNV	1	G	T	Heterozygous	13	27	48.1481	0.153846	37.6154	intergenic
NODE_4801684_length_362600_cov_18.039707 mapping	110328	SNV	1	T	C	Heterozygous	15	30	50	0.4	38.6667	intergenic
NODE_4801684_length_362600_cov_18.039707 mapping	110338	SNV	1	T	C	Heterozygous	13	27	48.1481	0.461538	39.3846	intergenic
NODE_4801684_length_362600_cov_18.039707 mapping	110375	SNV	1	G	A	Homozygous	27	27	100	0.296296	36.9259	intergenic
NODE_4801684_length_362600_cov_18.039707 mapping	110389	SNV	1	C	T	Heterozygous	9	25	36	0.333333	37.2222	intergenic
NODE_4801684_length_362600_cov_18.039707 mapping	110399	SNV	1	C	T	Homozygous	21	21	100	0.428571	36.3333	intergenic
NODE_4801684_length_362600_cov_18.039707 mapping	110423	SNV	1	A	T	Heterozygous	7	12	58.3333	0.285714	37.2857	intergenic
NODE_4801684_length_362600_cov_18.039707 mapping	110433	MNV	2	CC	TA	Heterozygous	10	16	62.5	0.2	37.15	intergenic
NODE_4801684_length_362600_cov_18.039707 mapping	110433	MNV	2	CC	TT	Heterozygous	6	16	37.5	0.5	35.5833	intergenic
NODE_4801684_length_362600_cov_18.039707 mapping	110439	SNV	1	G	A	Homozygous	19	19	100	0.263158	37.0526	intergenic
NODE_4801684_length_362600_cov_18.039707 mapping	110455	SNV	1	C	A	Heterozygous	10	19	52.6316	0.1	39	intergenic
NODE_4801684_length_362600_cov_18.039707 mapping	110459	SNV	1	G	T	Heterozygous	12	22	54.5455	0.0833333	38.9167	intergenic
NODE_4801684_length_362600_cov_18.039707 mapping	110473	MNV	2	CA	GG	Heterozygous	12	21	57.1429	0.166667	39.375	intergenic
NODE_4801684_length_362600_cov_18.039707 mapping	110487	SNV	1	G	A	Heterozygous	9	19	47.3684	0.222222	39.3333	intergenic
NODE_4801684_length_362600_cov_18.039707 mapping	110496	SNV	1	G	A	Homozygous	20	20	100	0.25	39.15	intergenic
NODE_4801684_length_362600_cov_18.039707 mapping	110502	SNV	1	T	C	Heterozygous	10	21	47.619	0.4	37.1	intergenic
NODE_4801684_length_362600_cov_18.039707 mapping	110514	SNV	1	C	T	Homozygous	22	22	100	0.272727	38.2727	intergenic
NODE_4801684_length_362600_cov_18.039707 mapping	110531	SNV	1	A	C	Heterozygous	9	21	42.8571	0.222222	38.3333	intergenic
NODE_4801684_length_362600_cov_18.039707 mapping	110537	SNV	1	T	C	Heterozygous	10	19	52.6316	0.4	33.6	intergenic
NODE_4801684_length_362600_cov_18.039707 mapping	110545	SNV	1	A	G	Homozygous	13	15	86.6667	0.384615	37.0769	intergenic
NODE_4801684_length_362600_cov_18.039707 mapping	110555	SNV	1	T	C	Homozygous	16	16	100	0.3125	34.3125	intergenic
NODE_4801684_length_362600_cov_18.039707 mapping	110572	SNV	1	T	A	Homozygous	16	16	100	0.25	37.0625	intergenic
NODE_4801684_length_362600_cov_18.039707 mapping	110628	SNV	1	A	G	Heterozygous	9	13	69.2308	0.333333	36.6667	intergenic
NODE_4801684_length_362600_cov_18.039707 mapping	110695	SNV	1	G	A	Homozygous	11	11	100	0.363636	37.1818	intergenic
NODE_4801684_length_362600_cov_18.039707 mapping	110699	SNV	1	G	A	Homozygous	13	13	100	0.307692	37	intergenic
NODE_4801684_length_362600_cov_18.039707 mapping	110720	SNV	1	G	A	Heterozygous	4	20	20	0.25	39.5	intergenic
NODE_4801684_length_362600_cov_18.039707 mapping	110725	SNV	1	A	T	Heterozygous	9	20	45	0.333333	39.3333	intergenic
NODE_4801684_length_362600_cov_18.039707 mapping	110729	SNV	1	T	A	Heterozygous	7	20	35	0.428571	37.8571	intergenic
NODE_4801684_length_362600_cov_18.039707 mapping	110733	SNV	1	G	T	Homozygous	20	20	100	0.45	38.9	intergenic
NODE_4801684_length_362600_cov_18.039707 mapping	110736	SNV	1	G	T	Heterozygous	13	20	65	0.461538	36.6923	intergenic
NODE_4801684_length_362600_cov_18.039707 mapping	110747	SNV	1	T	G	Heterozygous	8	17	47.0588	0.25	36.875	intergenic
NODE_4801684_length_362600_cov_18.039707 mapping	110758	MNV	2	CG	TA	Heterozygous	7	16	43.75	0.285714	37.5	intergenic
NODE_4801684_length_362600_cov_18.039707 mapping	110759	SNV	1	G	C	Heterozygous	9	16	56.25	0.333333	36.5882	intergenic
NODE_4801684_length_362600_cov_18.039707 mapping	110769	SNV	1	G	A	Heterozygous	8	16	50	0.375	32.875	intergenic
NODE_4801684_length_362600_cov_18.039707 mapping	110769	SNV	1	G	T	Heterozygous	8	16	50	0.375	36.375	intergenic
NODE_4801684_length_362600_cov_18.039707 mapping	110778	SNV	1	T	A	Heterozygous	7	15	46.6667	0.428571	35.5714	intergenic
NODE_4801684_length_362600_cov_18.039707 mapping	110780	SNV	1	A	T	Heterozygous	6	13	46.1538	0.5	38.3333	intergenic
NODE_4801684_length_362600_cov_18.039707 mapping	110784	SNV	1	A	T	Homozygous	11	11	100	0.454545	37.9091	intergenic
NODE_4801684_length_362600_cov_18.039707 mapping	110790	SNV	1	C	A	Heterozygous	5	12	41.6667	0.4	37	intergenic
NODE_4801684_length_362600_cov_18.039707 mapping	110829	SNV	1	A	G	Heterozygous	4	10	40	0.25	37	intergenic
NODE_4801684_length_362600_cov_18.039707 mapping	110837	SNV	1	A	T	Heterozygous	4	10	40	0.25	35.75	intergenic
NODE_4801684_length_362600_cov_18.039707 mapping	110862	SNV	1	C	T	Heterozygous	6	10	60	0.333333	39	intergenic
NODE_4801684_length_362600_cov_18.039707 mapping	110906	SNV	1	C	G	Heterozygous	7	14	50	0.428571	39.1429	intergenic
NODE_4801684_length_362600_cov_18.039707 mapping	110908	SNV	1	A	T	Heterozygous	7	13	53.8462	0.428571	38.1429	intergenic
NODE_4801684_length_362600_cov_18.039707 mapping	110920	SNV	1	C	T	Homozygous	12	12	100	0.333333	35.5833	intergenic
NODE_4801684_length_362600_cov_18.039707 mapping	110934	Replacement	2	G	TA	Heterozygous	6	10	60	0.333333	38.6364	intergenic
NODE_4801684_length_362600_cov_18.039707 mapping	110934	Replacement	2	G	CA	Heterozygous	4	10	40	0.5	40.5	intergenic
NODE_4801684_length_362600_cov_18.039707 mapping	110941	SNV	1	T	C	Heterozygous	6	10	60	0.333333	40	intergenic
NODE_4801684_length_362600_cov_18.039707 mapping	110941	MNV	2	TG	AA	Heterozygous	4	10	40	0.5	38	intergenic
NODE_4801684_length_362600_cov_18.039707 mapping	110951	SNV	1	A	T	Homozygous	13	13	100	0.461538	37	intergenic
NODE_4801684_length_362600_cov_18.039707 mapping	110967	SNV	1	A	G	Heterozygous	7	12	58.3333	0.428571	38.4286	intergenic
NODE_4801684_length_362600_cov_18.039707 mapping	111747	SNV	1	A	G	Homozygous	9	11	81.8182	0.3	37.2	intergenic
NODE_4801684_length_362600_cov_18.039707 mapping	111770	Deletion	2	GC	-	Heterozygous	7	10	70	0.428571	33.8571	intergenic
NODE_4801684_length_362600_cov_18.039707 mapping	111775	SNV	1	G	T	Homozygous	10	10	100	0.363636	35.0909	intergenic
NODE_4801684_length_362600_cov_18.039707 mapping	111881	SNV	1	T	G	Homozygous	10	10	100	0.4	37.5	intergenic
NODE_4801684_length_362600_cov_18.039707 mapping	111888	MNV	3	ACA	TTG	Heterozygous	8	11	72.7273	0.375	36.9583	intergenic
NODE_4801684_length_362600_cov_18.039707 mapping	111888	MNV	3	ACA	TCG	Heterozygous	3	11	27.2727	0.333333	37.3333	intergenic
NODE_4801684_length_362600_cov_18.039707 mapping	111895	SNV	1	T	C	Heterozygous	9	12	75	0.333333	37.5556	intergenic
NODE_4801684_length_362600_cov_18.039707 mapping	111895	SNV	1	T	G	Heterozygous	3	12	25	0.333333	37	intergenic
NODE_4801684_length_362600_cov_18.039707 mapping	111904	SNV	1	T	G	Heterozygous	8	12	66.6667	0.333333	39.1111	intergenic
NODE_4801684_length_362600_cov_18.039707 mapping	111911	SNV	1	C	A	Homozygous	13	13	100	0.428571	38.0714	intergenic
NODE_4801684_length_362600_cov_18.039707 mapping	111914	SNV	1	T	A	Heterozygous	4	13	30.7692	0.5	38.75	intergenic
NODE_4801684_length_362600_cov_18.039707 mapping	111941	SNV	1	T	A	Heterozygous	10	15	66.6667	0.454545	35.2727	intergenic
NODE_4801684_length_362600_cov_18.039707 mapping	111950	MNV	2	GT	AC	Homozygous	10	10	100	0.5	36.8	intergenic
NODE_4801684_length_362600_cov_18.039707 mapping	111957	SNV	1	A	C	Heterozygous	5	10	50	0.5	38.3333	intergenic
NODE_4801684_length_362600_cov_18.039707 mapping	112126	SNV	1	G	A	Homozygous	11	11	100	0.454545	37.1818	intergenic
NODE_4801684_length_362600_cov_18.039707 mapping	112152	SNV	1	G	A	Homozygous	10	10	100	0.4	37.3	intergenic
NODE_4801684_length_362600_cov_18.039707 mapping	112362	SNV	1	C	A	Heterozygous	6	12	50	0.333333	39.6667	intergenic
NODE_4801684_length_362600_cov_18.039707 mapping	112364	SNV	1	C	A	Heterozygous	6	12	50	0.333333	39.5	intergenic
NODE_4801684_length_362600_cov_18.039707 mapping	112428	Insertion	1	-	T	Heterozygous	4	12	33.3333	0.25	38.25	intergenic
NODE_4801684_length_362600_cov_18.039707 mapping	112430	SNV	1	T	C	Heterozygous	7	11	63.6364	0.142857	38.1429	intergenic
NODE_4801684_length_362600_cov_18.039707 mapping	112431	Deletion	1	C	-	Heterozygous	3	11	27.2727	0.333333	39	intergenic
NODE_4801684_length_362600_cov_18.039707 mapping	112442	SNV	1	A	G	Heterozygous	5	12	41.6667	0.2	38.2	intergenic
NODE_4801684_length_362600_cov_18.039707 mapping	112446	SNV	1	G	A	Heterozygous	7	12	58.3333	0.285714	38.1429	intergenic
NODE_4801684_length_362600_cov_18.039707 mapping	112455	Insertion	1	-	T	Heterozygous	5	12	41.6667	0.2	39.6	intergenic
NODE_4801684_length_362600_cov_18.039707 mapping	112463	SNV	1	T	A	Heterozygous	5	11	45.4545	0.2	39.4	intergenic
NODE_4801684_length_362600_cov_18.039707 mapping	112465	SNV	1	T	A	Heterozygous	6	11	54.5455	0.333333	36.1667	intergenic
NODE_4801684_length_362600_cov_18.039707 mapping	112484	SNV	1	G	A	Heterozygous	5	11	45.4545	0.2	36.2	intergenic
NODE_4801684_length_362600_cov_18.039707 mapping	112488	SNV	1	G	T	Homozygous	10	10	100	0.2	35.8	intergenic
NODE_4801684_length_362600_cov_18.039707 mapping	112493	SNV	1	A	G	Heterozygous	6	11	54.5455	0.166667	35.5	intergenic
NODE_4801684_length_362600_cov_18.039707 mapping	112496	SNV	1	C	G	Homozygous	11	11	100	0.181818	36.2727	intergenic
NODE_4801684_length_362600_cov_18.039707 mapping	112502	SNV	1	A	C	Homozygous	11	11	100	0.181818	33.8182	intergenic
NODE_4801684_length_362600_cov_18.039707 mapping	112505	SNV	1	A	G	Homozygous	11	11	100	0.181818	35.1818	intergenic
NODE_4801684_length_362600_cov_18.039707 mapping	112517	Deletion	1	T	-	Homozygous	7	10	70	0.285714	36.5714	intergenic
NODE_4801684_length_362600_cov_18.039707 mapping	112599	SNV	1	C	T	Heterozygous	4	10	40	0.25	37	intergenic
NODE_4801684_length_362600_cov_18.039707 mapping	112601	SNV	1	C	A	Homozygous	10	10	100	0.5	34.7	intergenic
NODE_4801684_length_362600_cov_18.039707 mapping	112607	SNV	1	T	C	Homozygous	10	10	100	0.5	36.4	intergenic
NODE_4801684_length_362600_cov_18.039707 mapping	112615	Insertion	1	-	A	Heterozygous	4	11	36.3636	0.25	40	intergenic
NODE_4801684_length_362600_cov_18.039707 mapping	112618	SNV	1	A	T	Heterozygous	2	10	20	0.5	39.5	intergenic
NODE_4801684_length_362600_cov_18.039707 mapping	112619	SNV	1	T	A	Heterozygous	4	10	40	0.25	40.5	intergenic
NODE_4801684_length_362600_cov_18.039707 mapping	112623	SNV	1	T	G	Heterozygous	4	10	40	0.25	40.25	intergenic
NODE_4801684_length_362600_cov_18.039707 mapping	112634	SNV	1	T	G	Heterozygous	2	11	18.1818	0.5	36.5	intergenic
NODE_4801684_length_362600_cov_18.039707 mapping	112690	SNV	1	A	T	Heterozygous	7	11	63.6364	0.285714	38	intergenic
NODE_4801684_length_362600_cov_18.039707 mapping	112767	SNV	1	G	A	Homozygous	11	11	100	0.454545	36.9091	intergenic
NODE_4801684_length_362600_cov_18.039707 mapping	112778	SNV	1	T	A	Heterozygous	5	13	38.4615	0.4	37.4	intergenic
NODE_4801684_length_362600_cov_18.039707 mapping	112780	SNV	1	C	T	Homozygous	13	13	100	0.461538	37.6154	intergenic
NODE_4801684_length_362600_cov_18.039707 mapping	112792	SNV	1	A	G	Heterozygous	4	13	30.7692	0.5	38.75	intergenic
NODE_4801684_length_362600_cov_18.039707 mapping	112794	SNV	1	C	T	Heterozygous	4	13	30.7692	0.5	35.5	intergenic
NODE_4801684_length_362600_cov_18.039707 mapping	112803	SNV	1	G	A	Heterozygous	6	14	42.8571	0.333333	37.0909	intergenic
NODE_4801684_length_362600_cov_18.039707 mapping	112803	MNV	2	GG	AA	Heterozygous	8	14	57.1429	0.5	36.25	intergenic
NODE_4801684_length_362600_cov_18.039707 mapping	112830	SNV	1	T	C	Homozygous	12	12	100	0.333333	37.9167	intergenic
NODE_4801684_length_362600_cov_18.039707 mapping	112835	MNV	2	TA	CG	Heterozygous	5	12	41.6667	0.4	36.4	intergenic
NODE_4801684_length_362600_cov_18.039707 mapping	112836	SNV	1	A	G	Heterozygous	7	12	58.3333	0.285714	38.2857	intergenic
NODE_4801684_length_362600_cov_18.039707 mapping	112841	SNV	1	C	T	Homozygous	10	10	100	0.3	38.4	intergenic
NODE_4801684_length_362600_cov_18.039707 mapping	112843	SNV	1	T	C	Heterozygous	5	10	50	0.4	37.2	intergenic
NODE_4801684_length_362600_cov_18.039707 mapping	112843	MNV	2	TC	CA	Heterozygous	5	10	50	0.2	39	intergenic
NODE_4801684_length_362600_cov_18.039707 mapping	112846	SNV	1	C	T	Heterozygous	5	10	50	0.2	38.2	intergenic
NODE_4801684_length_362600_cov_18.039707 mapping	112846	Deletion	1	C	-	Heterozygous	4	10	40	0.5	37.5	intergenic
NODE_4801684_length_362600_cov_18.039707 mapping	112867	SNV	1	T	A	Heterozygous	5	10	50	0.2	37	intergenic
NODE_4801684_length_362600_cov_18.039707 mapping	112873	SNV	1	G	A	Heterozygous	5	11	45.4545	0.2	36.4	intergenic
NODE_4801684_length_362600_cov_18.039707 mapping	112877	SNV	1	A	T	Heterozygous	5	12	41.6667	0.2	36.2	intergenic
NODE_4801684_length_362600_cov_18.039707 mapping	112880	SNV	1	T	C	Homozygous	12	12	100	0.25	35.6667	intergenic
NODE_4801684_length_362600_cov_18.039707 mapping	112884	SNV	1	T	C	Homozygous	11	11	100	0.272727	38.1818	intergenic
NODE_4801684_length_362600_cov_18.039707 mapping	112894	SNV	1	A	G	Homozygous	10	10	100	0.3	38.7	intergenic
NODE_4801684_length_362600_cov_18.039707 mapping	112899	SNV	1	C	T	Homozygous	10	10	100	0.3	35.2	intergenic
NODE_4801684_length_362600_cov_18.039707 mapping	112936	SNV	1	C	T	Heterozygous	3	11	27.2727	0.333333	36.6667	intergenic
NODE_4801684_length_362600_cov_18.039707 mapping	112962	SNV	1	G	A	Heterozygous	4	12	33.3333	0.5	36	intergenic
NODE_4801684_length_362600_cov_18.039707 mapping	112969	MNV	2	AT	GC	Heterozygous	7	11	63.6364	0.428571	38.5	intergenic
NODE_4801684_length_362600_cov_18.039707 mapping	112969	MNV	2	AT	GA	Heterozygous	4	11	36.3636	0.25	36.625	intergenic
NODE_4801684_length_362600_cov_18.039707 mapping	112989	SNV	1	C	T	Heterozygous	8	12	66.6667	0.25	37.375	intergenic
NODE_4801684_length_362600_cov_18.039707 mapping	113001	Insertion	1	-	T	Homozygous	12	13	92.3077	0.25	37.5	intergenic
NODE_4801684_length_362600_cov_18.039707 mapping	113011	SNV	1	T	C	Homozygous	13	13	100	0.153846	39.1538	intergenic
NODE_4801684_length_362600_cov_18.039707 mapping	113046	SNV	1	C	G	Heterozygous	7	12	58.3333	0.428571	33	intergenic
NODE_4801684_length_362600_cov_18.039707 mapping	113071	SNV	1	A	T	Heterozygous	5	11	45.4545	0.4	37.8	intergenic
NODE_4801684_length_362600_cov_18.039707 mapping	113077	SNV	1	C	A	Homozygous	12	12	100	0.5	39	intergenic
NODE_4801684_length_362600_cov_18.039707 mapping	113087	SNV	1	T	C	Homozygous	13	13	100	0.384615	38	intergenic
NODE_4801684_length_362600_cov_18.039707 mapping	113095	SNV	1	A	C	Heterozygous	7	13	53.8462	0.428571	37.8571	intergenic
NODE_4801684_length_362600_cov_18.039707 mapping	113095	SNV	1	A	T	Heterozygous	6	13	46.1538	0.333333	35	intergenic
NODE_4801684_length_362600_cov_18.039707 mapping	113100	SNV	1	A	G	Homozygous	14	14	100	0.428571	34.5	intergenic
NODE_4801684_length_362600_cov_18.039707 mapping	113114	SNV	1	G	A	Homozygous	13	13	100	0.461538	37.9231	intergenic
NODE_4801684_length_362600_cov_18.039707 mapping	113125	Deletion	1	C	-	Heterozygous	5	14	35.7143	0.4	31.2	intergenic
NODE_4801684_length_362600_cov_18.039707 mapping	113132	SNV	1	C	T	Heterozygous	3	13	23.0769	0.333333	41	intergenic
NODE_4801684_length_362600_cov_18.039707 mapping	113140	SNV	1	C	T	Homozygous	11	11	100	0.454545	36.3636	intergenic
NODE_4801684_length_362600_cov_18.039707 mapping	113147	SNV	1	T	C	Heterozygous	4	10	40	0.25	38.5	intergenic
NODE_4801684_length_362600_cov_18.039707 mapping	113265	SNV	1	T	C	Homozygous	12	13	92.3077	0.230769	38.2308	intergenic
NODE_4801684_length_362600_cov_18.039707 mapping	113276	SNV	1	G	A	Homozygous	8	14	57.1429	0.444444	39.1111	intergenic
NODE_4801684_length_362600_cov_18.039707 mapping	113301	SNV	1	C	T	Heterozygous	7	16	43.75	0.142857	38.2857	intergenic
NODE_4801684_length_362600_cov_18.039707 mapping	113308	Insertion	1	-	G	Heterozygous	9	19	47.3684	0.5	39.5	intergenic
NODE_4801684_length_362600_cov_18.039707 mapping	113310	MNV	2	GA	TG	Heterozygous	5	16	31.25	0.4	33.4	intergenic
NODE_4801684_length_362600_cov_18.039707 mapping	113311	Deletion	1	A	-	Heterozygous	11	16	68.75	0.363636	37	intergenic
NODE_4801684_length_362600_cov_18.039707 mapping	113313	Deletion	1	G	-	Homozygous	12	14	85.7143	0.461538	36.8462	intergenic
NODE_4801684_length_362600_cov_18.039707 mapping	113319	MNV	2	GA	AG	Heterozygous	9	14	64.2857	0.222222	38	intergenic
NODE_4801684_length_362600_cov_18.039707 mapping	113320	SNV	1	A	G	Heterozygous	5	14	35.7143	0.4	35.5	intergenic
NODE_4801684_length_362600_cov_18.039707 mapping	113345	SNV	1	C	T	Homozygous	10	10	100	0.272727	38.4545	intergenic
NODE_4801684_length_362600_cov_18.039707 mapping	113490	SNV	1	A	C	Homozygous	15	15	100	0.4	37.5333	intergenic
NODE_4801684_length_362600_cov_18.039707 mapping	113495	SNV	1	A	G	Homozygous	17	17	100	0.470588	37.5294	intergenic
NODE_4801684_length_362600_cov_18.039707 mapping	113501	SNV	1	G	T	Heterozygous	7	15	46.6667	0.285714	39	intergenic
NODE_4801684_length_362600_cov_18.039707 mapping	113504	SNV	1	G	A	Heterozygous	7	15	46.6667	0.285714	40	intergenic
NODE_4801684_length_362600_cov_18.039707 mapping	113508	SNV	1	G	T	Heterozygous	7	14	50	0.285714	37	intergenic
NODE_4801684_length_362600_cov_18.039707 mapping	113525	SNV	1	T	G	Homozygous	13	13	100	0.461538	38.5385	intergenic
NODE_4801684_length_362600_cov_18.039707 mapping	113529	SNV	1	T	A	Homozygous	13	13	100	0.461538	34.6923	intergenic
NODE_4801684_length_362600_cov_18.039707 mapping	113532	SNV	1	T	C	Homozygous	13	13	100	0.461538	36.2308	intergenic
NODE_4801684_length_362600_cov_18.039707 mapping	113550	SNV	1	G	A	Heterozygous	9	13	69.2308	0.222222	34.2222	intergenic
NODE_4801684_length_362600_cov_18.039707 mapping	113556	SNV	1	A	G	Homozygous	13	13	100	0.230769	36.3846	intergenic
NODE_4801684_length_362600_cov_18.039707 mapping	113560	SNV	1	G	A	Homozygous	13	13	100	0.230769	35.6923	intergenic
NODE_4801684_length_362600_cov_18.039707 mapping	113564	SNV	1	T	A	Heterozygous	7	11	63.6364	0.142857	37.7143	intergenic
NODE_4801684_length_362600_cov_18.039707 mapping	113612	MNV	2	GA	AG	Heterozygous	3	10	30	0.333333	37.3333	intergenic
NODE_4801684_length_362600_cov_18.039707 mapping	113613	SNV	1	A	G	Heterozygous	7	10	70	0.428571	39.8571	intergenic
NODE_4801684_length_362600_cov_18.039707 mapping	113627	SNV	1	T	C	Heterozygous	6	10	60	0.5	39.6667	intergenic
NODE_4801684_length_362600_cov_18.039707 mapping	113634	SNV	1	A	G	Homozygous	10	10	100	0.4	37.6	intergenic
NODE_4801684_length_362600_cov_18.039707 mapping	113642	MNV	2	AA	TG	Homozygous	10	10	100	0.5	38.4	intergenic
NODE_4801684_length_362600_cov_18.039707 mapping	113669	SNV	1	A	G	Homozygous	11	11	100	0.363636	37.9091	intergenic
NODE_4801684_length_362600_cov_18.039707 mapping	113675	SNV	1	C	T	Homozygous	11	11	100	0.363636	38.0909	intergenic
NODE_4801684_length_362600_cov_18.039707 mapping	113794	SNV	1	G	A	Homozygous	10	10	100	0.4	37.1	intergenic
NODE_4801684_length_362600_cov_18.039707 mapping	113811	SNV	1	G	A	Heterozygous	3	10	30	0.333333	39.6667	intergenic
NODE_4801684_length_362600_cov_18.039707 mapping	113823	SNV	1	A	G	Homozygous	11	12	91.6667	0.363636	38.7273	intergenic
NODE_4801684_length_362600_cov_18.039707 mapping	113831	SNV	1	A	G	Homozygous	12	12	100	0.333333	36.25	intergenic
NODE_4801684_length_362600_cov_18.039707 mapping	113848	SNV	1	A	C	Heterozygous	4	15	26.6667	0.5	36	intergenic
NODE_4801684_length_362600_cov_18.039707 mapping	113854	SNV	1	A	G	Heterozygous	4	13	30.7692	0.5	36.375	intergenic
NODE_4801684_length_362600_cov_18.039707 mapping	113854	MNV	2	AA	GG	Heterozygous	9	13	69.2308	0.333333	37.8333	intergenic
NODE_4801684_length_362600_cov_18.039707 mapping	113863	SNV	1	T	A	Homozygous	13	13	100	0.384615	38.2308	intergenic
NODE_4801684_length_362600_cov_18.039707 mapping	113865	SNV	1	C	A	Heterozygous	3	14	21.4286	0.333333	40.3333	intergenic
NODE_4801684_length_362600_cov_18.039707 mapping	113876	MNV	2	AT	CC	Heterozygous	5	15	33.3333	0.4	34.8	intergenic
NODE_4801684_length_362600_cov_18.039707 mapping	113877	SNV	1	T	C	Heterozygous	10	15	66.6667	0.2	36	intergenic
NODE_4801684_length_362600_cov_18.039707 mapping	113879	SNV	1	G	A	Homozygous	14	14	100	0.285714	37.2857	intergenic
NODE_4801684_length_362600_cov_18.039707 mapping	113898	SNV	1	A	G	Homozygous	13	13	100	0.307692	34.6154	intergenic
NODE_4801684_length_362600_cov_18.039707 mapping	113904	SNV	1	T	C	Homozygous	12	12	100	0.333333	35.8333	intergenic
NODE_4801684_length_362600_cov_18.039707 mapping	113908	SNV	1	G	T	Homozygous	12	12	100	0.333333	34.3333	intergenic
NODE_4801684_length_362600_cov_18.039707 mapping	114129	SNV	1	G	A	Heterozygous	5	10	50	0.2	39.4	intergenic
NODE_4801684_length_362600_cov_18.039707 mapping	114136	SNV	1	A	T	Heterozygous	2	11	18.1818	0.5	40	intergenic
NODE_4801684_length_362600_cov_18.039707 mapping	114141	SNV	1	C	A	Heterozygous	2	10	20	0.5	36.5	intergenic
NODE_4801684_length_362600_cov_18.039707 mapping	114150	MNV	2	CA	TC	Heterozygous	5	10	50	0.4	40.9	intergenic
NODE_4801684_length_362600_cov_18.039707 mapping	114194	SNV	1	C	A	Heterozygous	6	12	50	0.333333	37.3333	intergenic
NODE_4801684_length_362600_cov_18.039707 mapping	114196	SNV	1	T	C	Heterozygous	5	11	45.4545	0.2	39.4	intergenic
NODE_4801684_length_362600_cov_18.039707 mapping	114199	SNV	1	A	G	Homozygous	10	10	100	0.2	38.1	intergenic
NODE_4801684_length_362600_cov_18.039707 mapping	114223	SNV	1	G	A	Heterozygous	6	11	54.5455	0.166667	32.6667	intergenic
NODE_4801684_length_362600_cov_18.039707 mapping	114237	SNV	1	T	C	Heterozygous	2	11	18.1818	0.5	39	intergenic
NODE_4801684_length_362600_cov_18.039707 mapping	114240	SNV	1	A	T	Heterozygous	5	11	45.4545	0.2	38.4	intergenic
NODE_4801684_length_362600_cov_18.039707 mapping	114269	SNV	1	T	G	Homozygous	13	13	100	0.307692	36.7692	intergenic
NODE_4801684_length_362600_cov_18.039707 mapping	114281	Insertion	2	-	AT	Heterozygous	5	11	45.4545	0.4	39.1	intergenic
NODE_4801684_length_362600_cov_18.039707 mapping	114314	SNV	1	C	A	Homozygous	10	10	100	0.5	39	intergenic
NODE_4801684_length_362600_cov_18.039707 mapping	114325	SNV	1	C	T	Homozygous	12	12	100	0.5	39	intergenic
NODE_4801684_length_362600_cov_18.039707 mapping	114352	SNV	1	G	A	Homozygous	11	11	100	0.454545	38.4545	intergenic
NODE_4801684_length_362600_cov_18.039707 mapping	114364	SNV	1	C	A	Homozygous	12	12	100	0.5	38.5	intergenic
NODE_4801684_length_362600_cov_18.039707 mapping	114366	MNV	2	GA	TT	Homozygous	12	12	100	0.5	39.1667	intergenic
NODE_4801684_length_362600_cov_18.039707 mapping	114372	MNV	2	AT	GA	Homozygous	13	13	100	0.461538	37.6538	intergenic
NODE_4801684_length_362600_cov_18.039707 mapping	114401	Insertion	1	-	C	Homozygous	15	16	93.75	0.4	38.8667	intergenic
NODE_4801684_length_362600_cov_18.039707 mapping	114405	SNV	1	G	T	Homozygous	16	16	100	0.375	39.25	intergenic
NODE_4801684_length_362600_cov_18.039707 mapping	114407	SNV	1	T	A	Homozygous	16	16	100	0.375	38.375	intergenic
NODE_4801684_length_362600_cov_18.039707 mapping	114427	SNV	1	A	T	Heterozygous	3	13	23.0769	0.333333	39	intergenic
NODE_4801684_length_362600_cov_18.039707 mapping	114465	SNV	1	G	A	Homozygous	19	19	100	0.263158	39.3158	intergenic
NODE_4801684_length_362600_cov_18.039707 mapping	114468	SNV	1	G	A	Homozygous	19	19	100	0.263158	38.6316	intergenic
NODE_4801684_length_362600_cov_18.039707 mapping	114477	MNV	2	CT	GC	Homozygous	18	18	100	0.277778	38.8611	intergenic
NODE_4801684_length_362600_cov_18.039707 mapping	114497	SNV	1	G	C	Homozygous	19	19	100	0.263158	38.3684	intergenic
NODE_4801684_length_362600_cov_18.039707 mapping	114503	Insertion	1	-	A	Homozygous	18	18	100	0.277778	38.1667	intergenic
NODE_4801684_length_362600_cov_18.039707 mapping	114506	SNV	1	C	T	Homozygous	17	17	100	0.235294	40.1765	intergenic
NODE_4801684_length_362600_cov_18.039707 mapping	114510	SNV	1	A	G	Homozygous	8	17	47.0588	0.5	39.5	intergenic
NODE_4801684_length_362600_cov_18.039707 mapping	114512	MNV	2	AG	GT	Homozygous	16	16	100	0.25	39.0625	intergenic
NODE_4801684_length_362600_cov_18.039707 mapping	114568	SNV	1	A	G	Homozygous	11	11	100	0.363636	35.4545	intergenic
NODE_4801684_length_362600_cov_18.039707 mapping	114575	SNV	1	G	A	Homozygous	13	13	100	0.384615	36.6154	intergenic
NODE_4801684_length_362600_cov_18.039707 mapping	114581	SNV	1	C	A	Homozygous	15	15	100	0.333333	36.0667	intergenic
NODE_4801684_length_362600_cov_18.039707 mapping	114589	Insertion	1	-	T	Heterozygous	2	17	11.7647	0.5	38	intergenic
NODE_4801684_length_362600_cov_18.039707 mapping	114593	SNV	1	G	A	Homozygous	17	18	94.4444	0.235294	37.8824	intergenic
NODE_4801684_length_362600_cov_18.039707 mapping	114621	SNV	1	A	T	Homozygous	24	24	100	0.291667	37.9167	intergenic
NODE_4801684_length_362600_cov_18.039707 mapping	114625	SNV	1	T	A	Heterozygous	11	21	52.381	0.363636	38.6364	intergenic
NODE_4801684_length_362600_cov_18.039707 mapping	114630	SNV	1	G	A	Heterozygous	11	22	50	0.363636	38.7273	intergenic
NODE_4801684_length_362600_cov_18.039707 mapping	114642	SNV	1	G	T	Heterozygous	8	23	34.7826	0.375	40.125	intergenic
NODE_4801684_length_362600_cov_18.039707 mapping	114649	SNV	1	G	A	Heterozygous	12	24	50	0.5	38.0833	intergenic
NODE_4801684_length_362600_cov_18.039707 mapping	114664	SNV	1	G	T	Heterozygous	9	21	42.8571	0.444444	37.2222	intergenic
NODE_4801684_length_362600_cov_18.039707 mapping	114678	SNV	1	C	A	Homozygous	13	13	100	0.461538	38.4615	intergenic
NODE_4801684_length_362600_cov_18.039707 mapping	114680	SNV	1	G	T	Homozygous	13	13	100	0.461538	39.0769	intergenic
NODE_4801684_length_362600_cov_18.039707 mapping	114694	SNV	1	A	T	Heterozygous	9	18	50	0.444444	38.3333	intergenic
NODE_4801684_length_362600_cov_18.039707 mapping	114713	SNV	1	C	G	Heterozygous	7	12	58.3333	0.428571	37.8571	intergenic
NODE_4801684_length_362600_cov_18.039707 mapping	114716	MNV	2	CT	TC	Heterozygous	5	12	41.6667	0.4	31.4	intergenic
NODE_4801684_length_362600_cov_18.039707 mapping	114716	MNV	3	CTC	TCT	Heterozygous	7	12	58.3333	0.428571	37.2857	intergenic
NODE_4801684_length_362600_cov_18.039707 mapping	114720	SNV	1	A	T	Homozygous	12	12	100	0.5	35.8333	intergenic
NODE_4801684_length_362600_cov_18.039707 mapping	114725	Deletion	1	A	-	Heterozygous	5	13	38.4615	0.4	31.8	intergenic
NODE_4801684_length_362600_cov_18.039707 mapping	114737	SNV	1	T	A	Homozygous	11	11	100	0.454545	34.6364	intergenic
NODE_4801684_length_362600_cov_18.039707 mapping	114753	SNV	1	G	A	Heterozygous	5	10	50	0.4	37	intergenic
NODE_4801684_length_362600_cov_18.039707 mapping	114758	SNV	1	C	G	Heterozygous	3	10	30	0.333333	34	intergenic
NODE_4801684_length_362600_cov_18.039707 mapping	114762	SNV	1	A	G	Homozygous	10	10	100	0.4	37	intergenic
NODE_4801684_length_362600_cov_18.039707 mapping	114769	SNV	1	C	T	Homozygous	14	14	100	0.285714	35.0714	intergenic
NODE_4801684_length_362600_cov_18.039707 mapping	114774	SNV	1	G	T	Heterozygous	4	11	36.3636	0.5	36.5	intergenic
NODE_4801684_length_362600_cov_18.039707 mapping	114775	SNV	1	T	G	Heterozygous	7	12	58.3333	0.142857	37.2857	intergenic
NODE_4801684_length_362600_cov_18.039707 mapping	114783	SNV	1	C	G	Heterozygous	6	11	54.5455	0.166667	36.6667	intergenic
NODE_4801684_length_362600_cov_18.039707 mapping	114791	MNV	2	AA	CT	Homozygous	10	10	100	0.3	37.55	intergenic
NODE_4801684_length_362600_cov_18.039707 mapping	114803	SNV	1	A	C	Heterozygous	4	14	28.5714	0.25	39.5	intergenic
NODE_4801684_length_362600_cov_18.039707 mapping	114806	SNV	1	A	T	Homozygous	14	14	100	0.357143	37.2143	intergenic
NODE_4801684_length_362600_cov_18.039707 mapping	114832	SNV	1	G	A	Heterozygous	9	15	60	0.333333	40.2222	intergenic
NODE_4801684_length_362600_cov_18.039707 mapping	114832	SNV	1	G	T	Heterozygous	6	15	40	0.333333	39.1667	intergenic
NODE_4801684_length_362600_cov_18.039707 mapping	114848	SNV	1	A	G	Homozygous	16	16	100	0.4375	40	intergenic
NODE_4801684_length_362600_cov_18.039707 mapping	114866	SNV	1	A	G	Homozygous	14	14	100	0.428571	39.3571	intergenic
NODE_4801684_length_362600_cov_18.039707 mapping	114890	Deletion	1	G	-	Heterozygous	7	11	63.6364	0.285714	39.7143	intergenic
NODE_4801684_length_362600_cov_18.039707 mapping	114890	SNV	1	G	A	Heterozygous	4	11	36.3636	0.25	37.5	intergenic
NODE_4801684_length_362600_cov_18.039707 mapping	114915	SNV	1	A	G	Homozygous	7	12	58.3333	0.428571	38.2857	intergenic
NODE_4801684_length_362600_cov_18.039707 mapping	114917	SNV	1	T	A	Homozygous	12	12	100	0.333333	37.4167	intergenic
NODE_4801684_length_362600_cov_18.039707 mapping	114923	SNV	1	G	A	Heterozygous	6	15	40	0.166667	37.6667	intergenic
NODE_4801684_length_362600_cov_18.039707 mapping	114959	SNV	1	A	T	Heterozygous	12	16	75	0.416667	38.9167	intergenic
NODE_4801684_length_362600_cov_18.039707 mapping	114959	SNV	1	A	C	Heterozygous	4	16	25	0.25	39.5	intergenic
NODE_4801684_length_362600_cov_18.039707 mapping	114969	SNV	1	A	G	Homozygous	17	17	100	0.352941	37.5294	intergenic
NODE_4801684_length_362600_cov_18.039707 mapping	114977	SNV	1	T	C	Heterozygous	7	16	43.75	0.428571	39.5714	intergenic
NODE_4801684_length_362600_cov_18.039707 mapping	115001	SNV	1	C	T	Heterozygous	4	15	26.6667	0.25	40.5	intergenic
NODE_4801684_length_362600_cov_18.039707 mapping	115005	SNV	1	A	G	Homozygous	15	15	100	0.333333	38.8	intergenic
NODE_4801684_length_362600_cov_18.039707 mapping	115031	MNV	2	TA	AC	Homozygous	15	15	100	0.4	36.2	intergenic
NODE_4801684_length_362600_cov_18.039707 mapping	115037	SNV	1	A	C	Heterozygous	7	16	43.75	0.428571	39.5714	intergenic
NODE_4801684_length_362600_cov_18.039707 mapping	115040	SNV	1	T	C	Heterozygous	9	16	56.25	0.222222	36.4444	intergenic
NODE_4801684_length_362600_cov_18.039707 mapping	115042	SNV	1	A	T	Homozygous	16	16	100	0.375	36.9375	intergenic
NODE_4801684_length_362600_cov_18.039707 mapping	115050	Insertion	1	-	A	Heterozygous	8	16	50	0.375	36	intergenic
NODE_4801684_length_362600_cov_18.039707 mapping	115053	SNV	1	G	A	Heterozygous	8	15	53.3333	0.375	34.25	intergenic
NODE_4801684_length_362600_cov_18.039707 mapping	115057	SNV	1	T	C	Heterozygous	8	16	50	0.375	36.25	intergenic
NODE_4801684_length_362600_cov_18.039707 mapping	115066	SNV	1	G	A	Homozygous	15	15	100	0.4	37.3333	intergenic
NODE_4801684_length_362600_cov_18.039707 mapping	115069	SNV	1	T	C	Heterozygous	7	16	43.75	0.428571	39.5714	intergenic
NODE_4801684_length_362600_cov_18.039707 mapping	115077	SNV	1	A	C	Homozygous	17	17	100	0.470588	34.4706	intergenic
NODE_4801684_length_362600_cov_18.039707 mapping	115083	SNV	1	G	A	Homozygous	16	16	100	0.375	38	intergenic
NODE_4801684_length_362600_cov_18.039707 mapping	115109	SNV	1	G	A	Homozygous	17	17	100	0.235294	38.1765	intergenic
NODE_4801684_length_362600_cov_18.039707 mapping	115130	Insertion	4	-	TAAG	Heterozygous	11	16	68.75	0.0909091	38.2727	intergenic
NODE_4801684_length_362600_cov_18.039707 mapping	115130	Insertion	1	-	G	Heterozygous	5	16	31.25	0.4	35.45	intergenic
NODE_4801684_length_362600_cov_18.039707 mapping	115183	SNV	1	C	T	Homozygous	14	14	100	0.285714	36.5714	intergenic
NODE_4801684_length_362600_cov_18.039707 mapping	115194	SNV	1	C	T	Heterozygous	7	18	38.8889	0.428571	37.8571	intergenic
NODE_4801684_length_362600_cov_18.039707 mapping	115218	SNV	1	G	A	Homozygous	17	17	100	0.411765	36.8235	intergenic
NODE_4801684_length_362600_cov_18.039707 mapping	115224	SNV	1	A	G	Homozygous	19	19	100	0.421053	39	intergenic
NODE_4801684_length_362600_cov_18.039707 mapping	115228	SNV	1	G	T	Heterozygous	5	19	26.3158	0.4	39.6	intergenic
NODE_4801684_length_362600_cov_18.039707 mapping	115230	SNV	1	A	T	Homozygous	19	19	100	0.421053	38.5263	intergenic
NODE_4801684_length_362600_cov_18.039707 mapping	115250	MNV	2	TC	GT	Homozygous	16	16	100	0.375	37.0938	intergenic
NODE_4801684_length_362600_cov_18.039707 mapping	115257	SNV	1	T	G	Heterozygous	12	18	66.6667	0.333333	38.75	intergenic
NODE_4801684_length_362600_cov_18.039707 mapping	115257	SNV	1	T	A	Heterozygous	6	18	33.3333	0.333333	36.1667	intergenic
NODE_4801684_length_362600_cov_18.039707 mapping	115272	SNV	1	C	G	Homozygous	18	18	100	0.333333	38.7778	intergenic
NODE_4801684_length_362600_cov_18.039707 mapping	115288	SNV	1	C	T	Heterozygous	10	15	66.6667	0.4	32.8	intergenic
NODE_4801684_length_362600_cov_18.039707 mapping	115297	SNV	1	G	A	Heterozygous	4	13	30.7692	0.5	39.75	intergenic
NODE_4801684_length_362600_cov_18.039707 mapping	115301	Deletion	1	A	-	Heterozygous	10	13	76.9231	0.4	35.9	intergenic
NODE_4801684_length_362600_cov_18.039707 mapping	115309	SNV	1	G	T	Heterozygous	3	10	30	0.333333	38	intergenic
NODE_4801684_length_362600_cov_18.039707 mapping	115313	Deletion	2	AA	-	Heterozygous	3	11	27.2727	0.333333	38.3333	intergenic
NODE_4801684_length_362600_cov_18.039707 mapping	115319	SNV	1	C	T	Heterozygous	4	12	33.3333	0.5	35.75	intergenic
NODE_4801684_length_362600_cov_18.039707 mapping	115328	Deletion	1	G	-	Heterozygous	3	12	25	0.333333	35.3333	intergenic
NODE_4801684_length_362600_cov_18.039707 mapping	115398	SNV	1	G	A	Heterozygous	7	14	50	0.142857	28.2857	intergenic
NODE_4801684_length_362600_cov_18.039707 mapping	115410	SNV	1	G	A	Homozygous	13	13	100	0.307692	34.9231	intergenic
NODE_4801684_length_362600_cov_18.039707 mapping	115415	SNV	1	T	C	Homozygous	12	12	100	0.333333	36.1667	intergenic
NODE_4801684_length_362600_cov_18.039707 mapping	115419	SNV	1	C	T	Heterozygous	2	12	16.6667	0.5	33.5	intergenic
NODE_4801684_length_362600_cov_18.039707 mapping	115425	SNV	1	C	T	Heterozygous	5	11	45.4545	0.4	37.4	intergenic
NODE_4801684_length_362600_cov_18.039707 mapping	115431	SNV	1	T	A	Homozygous	10	10	100	0.2	37.1	intergenic
NODE_4801684_length_362600_cov_18.039707 mapping	115437	SNV	1	C	T	Heterozygous	5	11	45.4545	0.4	37.8	intergenic
NODE_4801684_length_362600_cov_18.039707 mapping	115440	SNV	1	G	C	Heterozygous	6	12	50	0.166667	36.8333	intergenic
NODE_4801684_length_362600_cov_18.039707 mapping	115453	SNV	1	C	T	Heterozygous	6	12	50	0.333333	36	intergenic
NODE_4801684_length_362600_cov_18.039707 mapping	115671	SNV	1	G	T	Homozygous	10	10	100	0.4	36.6	intergenic
NODE_4801684_length_362600_cov_18.039707 mapping	115674	SNV	1	A	G	Heterozygous	6	10	60	0.333333	36.3333	intergenic
NODE_4801684_length_362600_cov_18.039707 mapping	115674	SNV	1	A	T	Heterozygous	4	10	40	0.5	39.25	intergenic
NODE_4801684_length_362600_cov_18.039707 mapping	115681	SNV	1	T	C	Homozygous	11	11	100	0.272727	37.1818	intergenic
NODE_4801684_length_362600_cov_18.039707 mapping	115690	SNV	1	C	T	Homozygous	7	10	70	0.285714	37	intergenic
NODE_4801684_length_362600_cov_18.039707 mapping	115697	SNV	1	G	A	Homozygous	10	10	100	0.2	36.7	intergenic
NODE_4801684_length_362600_cov_18.039707 mapping	115716	SNV	1	G	A	Heterozygous	3	10	30	0.333333	37.3333	intergenic
NODE_4801684_length_362600_cov_18.039707 mapping	115796	SNV	1	G	T	Heterozygous	2	10	20	0.5	39	intergenic
NODE_4801684_length_362600_cov_18.039707 mapping	115803	SNV	1	G	T	Heterozygous	3	11	27.2727	0.333333	35.6667	intergenic
NODE_4801684_length_362600_cov_18.039707 mapping	115832	SNV	1	C	G	Heterozygous	3	10	30	0.333333	39.6667	intergenic
NODE_4801684_length_362600_cov_18.039707 mapping	115845	SNV	1	G	A	Heterozygous	3	11	27.2727	0.333333	38.6667	intergenic
NODE_4801684_length_362600_cov_18.039707 mapping	115858	SNV	1	T	C	Homozygous	10	11	90.9091	0.4	39	intergenic
NODE_4801684_length_362600_cov_18.039707 mapping	115864	SNV	1	T	G	Homozygous	10	12	83.3333	0.4	37.8	intergenic
NODE_4801684_length_362600_cov_18.039707 mapping	115868	Deletion	2	TC	-	Homozygous	11	11	100	0.363636	32.9091	intergenic
NODE_4801684_length_362600_cov_18.039707 mapping	115881	SNV	1	C	T	Homozygous	7	10	70	0.428571	36.4286	intergenic
NODE_4801684_length_362600_cov_18.039707 mapping	116202	SNV	1	T	C	Homozygous	4	10	40	0.25	38.75	intergenic
NODE_4801684_length_362600_cov_18.039707 mapping	116216	SNV	1	C	T	Homozygous	11	11	100	0.272727	35	intergenic
NODE_4801684_length_362600_cov_18.039707 mapping	116236	SNV	1	T	G	Homozygous	11	11	100	0.272727	38.2727	intergenic
NODE_4801684_length_362600_cov_18.039707 mapping	116239	SNV	1	A	G	Heterozygous	6	12	50	0.333333	38.1667	intergenic
NODE_4801684_length_362600_cov_18.039707 mapping	116262	SNV	1	G	A	Heterozygous	7	13	53.8462	0.285714	37.2857	intergenic
NODE_4801684_length_362600_cov_18.039707 mapping	116268	SNV	1	T	C	Homozygous	14	14	100	0.357143	37.1429	intergenic
NODE_4801684_length_362600_cov_18.039707 mapping	116270	SNV	1	T	A	Heterozygous	6	14	42.8571	0.5	35.6667	intergenic
NODE_4801684_length_362600_cov_18.039707 mapping	116276	SNV	1	C	T	Homozygous	13	13	100	0.384615	37	intergenic
NODE_4801684_length_362600_cov_18.039707 mapping	116281	MNV	2	TT	GG	Heterozygous	7	12	58.3333	0.428571	37.6429	intergenic
NODE_4801684_length_362600_cov_18.039707 mapping	116281	MNV	2	TT	CG	Heterozygous	5	12	41.6667	0.4	38.2	intergenic
NODE_4801684_length_362600_cov_18.039707 mapping	116296	SNV	1	T	C	Homozygous	12	12	100	0.416667	37.8333	intergenic
NODE_4801684_length_362600_cov_18.039707 mapping	116308	SNV	1	C	T	Homozygous	11	11	100	0.454545	36.6364	intergenic
NODE_4801684_length_362600_cov_18.039707 mapping	116310	SNV	1	C	A	Homozygous	11	11	100	0.454545	36.0909	intergenic
NODE_4801684_length_362600_cov_18.039707 mapping	116323	SNV	1	A	T	Heterozygous	5	11	45.4545	0.4	37.2	intergenic
NODE_4801684_length_362600_cov_18.039707 mapping	116327	SNV	1	G	A	Heterozygous	5	10	50	0.4	38.2	intergenic
NODE_4801684_length_362600_cov_18.039707 mapping	117068	SNV	1	G	A	Heterozygous	3	10	30	0.333333	37	intergenic
NODE_4801684_length_362600_cov_18.039707 mapping	117111	Insertion	1	-	G	Homozygous	10	10	100	0.5	37	exon
NODE_4801684_length_362600_cov_18.039707 mapping	117141	SNV	1	A	T	Heterozygous	3	10	30	0.333333	36.6667	exon
NODE_4801684_length_362600_cov_18.039707 mapping	117143	SNV	1	T	G	Heterozygous	3	11	27.2727	0.333333	36.6667	exon
NODE_4801684_length_362600_cov_18.039707 mapping	117181	SNV	1	T	C	Heterozygous	5	11	45.4545	0.2	39.4	exon
NODE_4801684_length_362600_cov_18.039707 mapping	117190	SNV	1	T	C	Heterozygous	7	12	58.3333	0.428571	39.7143	exon
NODE_4801684_length_362600_cov_18.039707 mapping	117210	SNV	1	T	C	Heterozygous	3	12	25	0.333333	38	exon
NODE_4801684_length_362600_cov_18.039707 mapping	117242	SNV	1	G	A	Homozygous	11	11	100	0.363636	37.4545	exon
NODE_4801684_length_362600_cov_18.039707 mapping	117251	SNV	1	A	G	Homozygous	12	12	100	0.333333	38.5833	exon
NODE_4801684_length_362600_cov_18.039707 mapping	117263	SNV	1	A	G	Homozygous	11	11	100	0.363636	38.7273	exon
NODE_4801684_length_362600_cov_18.039707 mapping	117294	SNV	1	A	C	Homozygous	7	13	53.8462	0.285714	39.4286	exon
NODE_4801684_length_362600_cov_18.039707 mapping	117297	SNV	1	C	T	Homozygous	13	13	100	0.153846	37.5385	exon
NODE_4801684_length_362600_cov_18.039707 mapping	117316	SNV	1	G	C	Homozygous	13	13	100	0.230769	37.4615	exon
NODE_4801684_length_362600_cov_18.039707 mapping	117324	SNV	1	C	T	Heterozygous	6	13	46.1538	0.166667	36.5	exon
NODE_4801684_length_362600_cov_18.039707 mapping	117369	SNV	1	C	A	Heterozygous	6	13	46.1538	0.5	36.6667	exon
NODE_4801684_length_362600_cov_18.039707 mapping	117371	SNV	1	A	G	Heterozygous	5	15	33.3333	0.4	38.6	exon
NODE_4801684_length_362600_cov_18.039707 mapping	117373	SNV	1	A	G	Heterozygous	4	13	30.7692	0.25	39.5	exon
NODE_4801684_length_362600_cov_18.039707 mapping	117376	SNV	1	C	G	Homozygous	13	13	100	0.461538	37.6923	exon
NODE_4801684_length_362600_cov_18.039707 mapping	117382	SNV	1	G	A	Homozygous	14	14	100	0.428571	37.5	exon
NODE_4801684_length_362600_cov_18.039707 mapping	117399	SNV	1	G	A	Homozygous	15	15	100	0.466667	36.2	exon
NODE_4801684_length_362600_cov_18.039707 mapping	117420	SNV	1	C	T	Heterozygous	12	18	66.6667	0.416667	37.4167	exon
NODE_4801684_length_362600_cov_18.039707 mapping	117424	SNV	1	A	G	Heterozygous	6	19	31.5789	0.166667	38.3333	exon
NODE_4801684_length_362600_cov_18.039707 mapping	117442	SNV	1	C	T	Heterozygous	11	15	73.3333	0.363636	37.7273	exon
NODE_4801684_length_362600_cov_18.039707 mapping	117509	SNV	1	G	A	Heterozygous	4	14	28.5714	0.25	33.75	exon
NODE_4801684_length_362600_cov_18.039707 mapping	117520	SNV	1	C	A	Heterozygous	5	15	33.3333	0.4	31.8	exon
NODE_4801684_length_362600_cov_18.039707 mapping	117587	SNV	1	C	T	Heterozygous	3	10	30	0.333333	39	exon
NODE_4801684_length_362600_cov_18.039707 mapping	119106	SNV	1	C	T	Homozygous	10	10	100	0.1	35.6	exon
NODE_4801684_length_362600_cov_18.039707 mapping	119118	SNV	1	T	C	Heterozygous	5	11	45.4545	0.2	37.4	exon
NODE_4801684_length_362600_cov_18.039707 mapping	119161	SNV	1	A	G	Heterozygous	7	13	53.8462	0.428571	38	exon
NODE_4801684_length_362600_cov_18.039707 mapping	119167	SNV	1	C	T	Heterozygous	6	14	42.8571	0.5	35	exon
NODE_4801684_length_362600_cov_18.039707 mapping	119201	SNV	1	G	A	Heterozygous	6	15	40	0.333333	38	exon
NODE_4801684_length_362600_cov_18.039707 mapping	119214	Deletion	7	TAGAATT	-	Heterozygous	6	17	35.2941	0.333333	39	exon
NODE_4801684_length_362600_cov_18.039707 mapping	119326	SNV	1	G	T	Heterozygous	7	12	58.3333	0.142857	34.5714	exon
NODE_4801684_length_362600_cov_18.039707 mapping	119326	SNV	1	G	C	Heterozygous	5	12	41.6667	0.4	38.4	exon
NODE_4801684_length_362600_cov_18.039707 mapping	119351	MNV	2	CT	TG	Heterozygous	8	16	50	0.25	34.4375	exon
NODE_4801684_length_362600_cov_18.039707 mapping	119383	SNV	1	C	G	Homozygous	13	13	100	0.307692	38.3846	exon
NODE_4801684_length_362600_cov_18.039707 mapping	119392	SNV	1	G	A	Heterozygous	10	15	66.6667	0.2	34.6	exon
NODE_4801684_length_362600_cov_18.039707 mapping	119395	SNV	1	G	A	Heterozygous	10	15	66.6667	0.2	37.1	exon
NODE_4801684_length_362600_cov_18.039707 mapping	119428	SNV	1	A	G	Heterozygous	4	11	36.3636	0.25	39.75	exon
NODE_4801684_length_362600_cov_18.039707 mapping	119431	SNV	1	G	A	Homozygous	10	10	100	0.4	37.1	exon
NODE_4801684_length_362600_cov_18.039707 mapping	119494	SNV	1	G	T	Heterozygous	6	10	60	0.5	36.8333	exon
NODE_4801684_length_362600_cov_18.039707 mapping	119644	SNV	1	C	A	Heterozygous	5	10	50	0.4	37.6	exon
NODE_4801684_length_362600_cov_18.039707 mapping	119659	SNV	1	A	T	Heterozygous	5	11	45.4545	0.4	38	exon
NODE_4801684_length_362600_cov_18.039707 mapping	119661	SNV	1	T	C	Homozygous	11	11	100	0.454545	36.6364	exon
NODE_4801684_length_362600_cov_18.039707 mapping	119671	SNV	1	A	G	Heterozygous	5	11	45.4545	0.4	37	exon
NODE_4801684_length_362600_cov_18.039707 mapping	215830	SNV	1	T	A	Homozygous	2	10	20	0.5	39	intergenic
NODE_4801684_length_362600_cov_18.039707 mapping	215832	Insertion	1	-	T	Homozygous	2	10	20	0.5	40	intergenic
NODE_4801684_length_362600_cov_18.039707 mapping	215837	SNV	1	T	A	Homozygous	13	13	100	0.0769231	37.1538	intergenic
NODE_4801684_length_362600_cov_18.039707 mapping	215868	SNV	1	C	T	Heterozygous	7	15	46.6667	0.142857	37.2857	intergenic
NODE_4801684_length_362600_cov_18.039707 mapping	215872	SNV	1	C	T	Heterozygous	13	16	81.25	0.153846	38.5385	intergenic
NODE_4801684_length_362600_cov_18.039707 mapping	215872	SNV	1	C	A	Heterozygous	3	16	18.75	0.333333	36.6667	intergenic
NODE_4801684_length_362600_cov_18.039707 mapping	215883	SNV	1	T	A	Heterozygous	3	16	18.75	0.333333	39	intergenic
NODE_4801684_length_362600_cov_18.039707 mapping	215885	SNV	1	A	G	Homozygous	16	16	100	0.25	38.125	intergenic
NODE_4801684_length_362600_cov_18.039707 mapping	215896	SNV	1	C	A	Homozygous	15	15	100	0.266667	37.3333	intergenic
NODE_4801684_length_362600_cov_18.039707 mapping	215901	SNV	1	C	T	Homozygous	15	15	100	0.266667	37	intergenic
NODE_4801684_length_362600_cov_18.039707 mapping	216021	MNV	2	CT	AA	Heterozygous	9	17	52.9412	0.222222	36.7222	intergenic
NODE_4801684_length_362600_cov_18.039707 mapping	216022	SNV	1	T	A	Heterozygous	8	17	47.0588	0.125	36.5	intergenic
[truncated: 343,770+ more rows]
