# Supplementary material for: The genome and transcriptome of Phalaenopsis yield insights into floral organ development and flowering regulation
Source: PeerJ. 2016 May 12;4:e2017. doi: 10.7717/peerj.2017 (PMC4868593; doi:10.7717/peerj.2017)
Supplement: Supplemental Information 7 — Sequence read archive. [file peerj-04-2017-s007.xlsx]

## Sheet: 工作表1
Sample name	Plant tissue	Library Type	Sequence read archive
Phalaenopsis 'KHM190'	Mature leafy	gDNA pair end	SRR1747138
	Mature leafy	gDNA pair end	SRR1753943
	Mature leafy	gDNA pair end	SRR1753944
	Mature leafy	gDNA pair end	SRR1753945
	Mature leafy	gDNA pair end	SRR1753946
	Mature leafy	gDNA pair end	SRR1753947
	Mature leafy	gDNA pair end	SRR1753948
	Mature leafy	gDNA pair end	SRR1753949
	Mature leafy	gDNA pair end	SRR1753950
	Mature leafy	gDNA mate pair	SRR1752971
	Mature leafy	gDNA mate pair	SRR1753106
	Mature leafy	gDNA mate pair	SRR1753165
	Mature leafy	gDNA mate pair	SRR1753166
Phalaenopsis ‘B8802’	Mature leafy	gDNA pair end	SRR1762751
	Mature leafy	gDNA pair end	SRR1762752
	Mature leafy	gDNA pair end	SRR1762753
BH	Phalaenopsis aphrodite Shoot tip; high-temperature treatment was carried out at 30/27°C (day/nigh)	RNA-seq	SRR1760428
BL1	Phalaenopsis aphrodite Shoot tip; low-temperature treatment was carried out at 22/18°C (day/night): 1 week	RNA-seq	SRR1760429
BL2	Phalaenopsis aphrodite Shoot tip; low-temperature treatment was carried out at 22/18°C (day/night): 2 week	RNA-seq	SRR1760430
BL3	Phalaenopsis aphrodite Shoot tip; low-temperature treatment was carried out at 22/18°C (day/night): 3 week	RNA-seq	SRR1760432
BL4	Phalaenopsis aphrodite Shoot tip; low-temperature treatment was carried out at 22/18°C (day/night): 4 week	RNA-seq	SRR1760433
BN	Phalaenopsis aphrodite wild type leaf	RNA-seq	SRR1760435
BW	Phalaenopsis aphrodite mutant with leaf intervein chlorosis	RNA-seq	SRR1760436
B190-0	Phalaenopsis ‘KHM190’ PLB after cutting and growth on induction medium for 0 week	RNA-seq	SRR1760438
B190-2W	Phalaenopsis ‘KHM190’ PLB after cutting and growth on induction medium for 2 wee	RNA-seq	SRR1760439
NSa	Phalaenopsis ‘KHM190’wild type sepal	RNA-seq	SRX396172
NPa	Phalaenopsis ‘KHM190’wild type petal	RNA-seq	SRX396784
NLa	Phalaenopsis ‘KHM190’wild type lip	RNA-seq	SRX396785
PSa	Phalaenopsis ‘KHM190’peloric mutant sepal	RNA-seq	SRX396786
PPa	Phalaenopsis ‘KHM190’peloric mutant petal	RNA-seq	SRX396787
PLa	Phalaenopsis ‘KHM190’peloric mutant lip	RNA-seq	SRX396788
BH	Phalaenopsis aphrodite Shoot tip; high-temperature treatment was carried out at 30/27°C (day/nigh)	sRNA-seq	SRR1760523
BL1	Phalaenopsis aphrodite Shoot tip; low-temperature treatment was carried out at 22/18°C (day/night): 1 week	sRNA-seq	SRR1760524
BL2	Phalaenopsis aphrodite Shoot tip; low-temperature treatment was carried out at 22/18°C (day/night): 2 week	sRNA-seq	SRR1760525
BL3	Phalaenopsis aphrodite Shoot tip; low-temperature treatment was carried out at 22/18°C (day/night): 3 week	sRNA-seq	SRR1760526
BL4	Phalaenopsis aphrodite Shoot tip; low-temperature treatment was carried out at 22/18°C (day/night): 4 week	sRNA-seq	SRR1760527
BN	Phalaenopsis aphrodite wild type leaf	sRNA-seq	SRR1760528
BW	Phalaenopsis aphrodite mutant with leaf intervein chlorosis	sRNA-seq	SRR1760530
B190-0	Phalaenopsis ‘KHM190’ PLB after cutting and growth on induction medium for 0 week	sRNA-seq	SRR1760531
B190-2W	Phalaenopsis ‘KHM190’ PLB after cutting and growth on induction medium for 2 wee	sRNA-seq	SRR1760532
NS	Phalaenopsis ‘KHM190’wild type sepal	sRNA-seq	SRR1760091
NP	Phalaenopsis ‘KHM190’wild type petal	sRNA-seq	SRR1760211
NL	Phalaenopsis ‘KHM190’wild type lip	sRNA-seq	SRR1760212
PS	Phalaenopsis ‘KHM190’peloric mutant sepal	sRNA-seq	SRR1760213
PP	Phalaenopsis ‘KHM190’peloric mutant petal	sRNA-seq	SRR1760270
PL	Phalaenopsis ‘KHM190’peloric mutant lip	sRNA-seq	SRR1760271
a: Huang et al., 2015
